# Supplementary material for: Highly stereoselective α-glycosylation with GalN 3 donors enabled collective synthesis of mucin-related tumor associated carbohydrate antigens
Source: Royal Society of Chemistry journal article supplement (doi:10.1039/d4sc01348d), 2024-01-01

## Supporting Information

### **Highly stereoselective $\alpha$ -glycosylation with GalN<sub>3</sub> donors enabled collective synthesis of mucin-related tumor associated carbohydrates antigens**

Kunxiu Shou<sup>a+</sup>, Yunqin Zhang<sup>a+</sup>, Yujie Ji<sup>b+</sup>, Bin Liu<sup>a</sup>, Qingli Zhou<sup>a</sup>, Qiang Tan<sup>a</sup>, Fuying Li<sup>c</sup>, Xiufang Wang<sup>c</sup>, Gang Lu<sup>b\*</sup>, Guozhi Xiao<sup>a\*</sup>

<sup>a</sup> State Key Laboratory of Phytochemistry and Plant Resources in West China, Kunming Institute of Botany, University of Chinese Academy of Sciences, Chinese Academy of Sciences, Kunming 650201, China

<sup>b</sup> School of Chemistry and Chemical Engineering, Shandong University, Jinan, Shandong 250100, China

<sup>c</sup> Department of Chemistry, Kunming University, 2 Puxing Road, Kunming 650214, China

+ these authors contributed equally

\*Correspondence: [xiaoguzhi@mail.kib.ac.cn](mailto:xiaoguzhi@mail.kib.ac.cn); [ganglu@sdu.edu.cn](mailto:ganglu@sdu.edu.cn)

---

## Table of Contents

|                                                                      |     |
|----------------------------------------------------------------------|-----|
| General Methods .....                                                | 2   |
| General Experimental Procedures.....                                 | 3   |
| Experimental procedures .....                                        | 4   |
| Optimization of the reaction.....                                    | 4   |
| Reaction scope of GalN <sub>3</sub> PTFAI donors .....               | 15  |
| Reaction Scope of acceptors .....                                    | 34  |
| Preparation of the common intermediate 16 .....                      | 59  |
| Synthesis of T <sub>N</sub> antigen (1).....                         | 62  |
| Preparation of donors 32-34 and acceptors 39 and S32.....            | 64  |
| Synthesis of core 1 mucin-type <i>O</i> -glycan (2) .....            | 69  |
| Synthesis of core 3 mucin-type <i>O</i> -glycan (4) .....            | 71  |
| Synthesis of core 5 mucin-type <i>O</i> -glycan (6) .....            | 74  |
| Synthesis of core 8 mucin-type <i>O</i> -glycan (9) .....            | 76  |
| Synthesis of core ST <sub>N</sub> antigen (10) .....                 | 78  |
| Synthesis of core 6 mucin-type <i>O</i> -glycan (7) .....            | 80  |
| Synthesis of core 7 mucin-type <i>O</i> -glycan (8) .....            | 83  |
| Synthesis of core 2 mucin-type <i>O</i> -glycan (3) .....            | 85  |
| Synthesis of core 4 mucin-type <i>O</i> -glycan (5) .....            | 88  |
| Synthesis of 2,6 STF antigen (11) .....                              | 91  |
| Synthesis of 2,3 STF antigen (12) .....                              | 93  |
| Synthesis of glycophorin (13) .....                                  | 96  |
| Mechanistic studies .....                                            | 97  |
| Computational studies .....                                          | 100 |
| References .....                                                     | 105 |
| Cartesian coordinates (Å) and energies of optimized structures ..... | 107 |
| Spectroscopic Data .....                                             | 143 |

---

## General Methods

All reactions were carried out under an argon atmosphere with anhydrous solvents under anhydrous conditions, unless otherwise noted. All glycosylation reactions were performed in the presence of 3Å or 4Å molecular sieves, which were flame-dried immediately before use in the reaction under high vacuum. Tetrahydrofuran (THF) was distilled immediately before use from sodium-benzophenoneketyl. Methylene chloride (DCM) was distilled from calcium hydride and stored under an argon atmosphere. Toluene was distilled immediately from calcium chloride before use. Reagents were purchased at the highest commercial quality and used without further purification, unless otherwise stated. Reactions were monitored by thin layer chromatography (TLC) carried out on TLC Silica gel 60 F<sub>254</sub> or TLC Silica gel 60 RP-18 F<sub>254</sub>S (EMD Millipore Corporation) using UV light (254 nm) as visualizing agent and 10% PMA/EtOH solution or 10% H<sub>2</sub>SO<sub>4</sub>/EtOH solution as developing agent. Flash column chromatography was performed on silica gel, LiChroprep<sup>®</sup> RP-18 (EMD Millipore Corporation) or Sephadex<sup>™</sup> LH-20 (GE Healthcare).

The <sup>1</sup>H-NMR, <sup>13</sup>C-NMR, H-H COSY and HSQC spectra were measured by a Bruker AVANCE III 400MHz spectrometer, Bruker Avance III 600MHz spectrometer or Bruker AV 800MHz spectrometer by using CDCl<sub>3</sub> or D<sub>2</sub>O as internal references: CDCl<sub>3</sub> (<sup>1</sup>H NMR δ = 7.26 ppm, <sup>13</sup>C NMR δ = 77.16 ppm) or D<sub>2</sub>O (<sup>1</sup>H NMR δ = 4.79 ppm). The following abbreviations are used to designate multiplicities: s = singlet, d = doublet, t = triplet, q = quartet, m = multiplet. Electron spray ionization (ESI) and high-resolution electron spray ionization (HRESI) were obtained on an Agilent 1290 spectrometer. MALDI-TOF spectra were recorded on a new ultrafleXtreme. The specific rotation was obtained on a Jasco P-1020, using CHCl<sub>3</sub> or H<sub>2</sub>O as solvent.

---

## General Experimental Procedures

A mixture of glycosyl PTFAI donor (1.5 equiv) and the acceptor (1.0 equiv) was co-evaporated with anhydrous toluene for three times. Then the mixture together with  $\text{Ph}_3\text{P}=\text{O}$  (6.0 equiv to the donor) were dissolved in dry DCM (0.1 M) and stirred over fresh-dried 3Å molecular sieves under argon at room temperature for 15 min. Subsequently, TMSI (1.0 equiv to the donor) was added dropwise. The reaction was stirred at room temperature. Upon completion, the solution was diluted with DCM and the reaction was quenched with saturated  $\text{Na}_2\text{S}_2\text{O}_3$ . The organic phase was washed with water and brine, dried over anhydrous  $\text{Na}_2\text{SO}_4$ , filtered and concentrated *in vacuo*. The products were purified by flash column chromatography.

## Experimental procedures

### Optimization of the reaction

#### *N*-(Benzyl)benzyloxycarbonyl-5-amino-pentyl 2-azido-3,4,6-tri-*O*-benzyl-2-deoxy-*D*-galactopyranoside (**19b**)

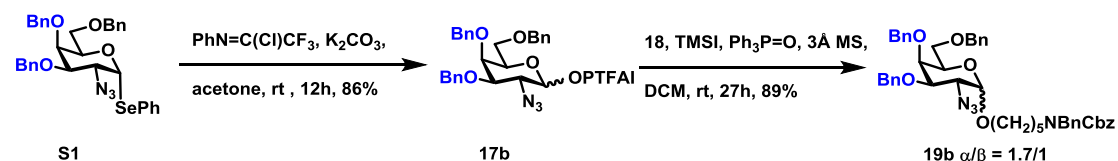

Compound **S1**<sup>1</sup> (104.1 mg, 0.22 mmol) and 2,2,2-trifluoro-*N*-phenylacetimidoyl chloride<sup>2</sup> (54.5 mg, 0.26 mmol) was dissolved in acetone (1 mL), and K<sub>2</sub>CO<sub>3</sub> (45.5 mg, 0.33 mmol) was added. The reaction was stirred at room temperature for 12 h, then filtered and concentrated *in vacuo*. The residue was purified by flash column chromatography (petroleum ether, containing 2% Et<sub>3</sub>N) to give **17b** (131 mg, 93%) (Compound **17b** was used directly without further structural characterization). The glycosylation reaction was carried out according to **General Experimental Procedures** at 30 °C for 27 h, using donor **17b** (129 mg, 0.20 mmol), acceptor **18** (98 mg, 0.30 mmol), DCM (2 mL), Ph<sub>3</sub>P=O (333.1 mg, 1.20 mmol) and TMSI (29 μL, 0.20 mmol). The product was purified by silica gel column chromatography (PE-EA, 6:1) to afford **19b** (138.4 mg, 89%,  $\alpha/\beta = 1.7:1$ ) as a yellowish syrup. <sup>1</sup>H NMR (400 MHz, CDCl<sub>3</sub>)  $\delta$  7.42 – 7.11 (m, 25H, Ar), 5.21 – 5.11 (m, 2H, CH<sub>2</sub>-Cbz), 4.91 – 4.83 (m, 2H, H-1 $\alpha$ , CH<sub>2</sub>-Bn), 4.74 – 4.63 (m, 2H, CH<sub>2</sub>-Bn), 4.59 – 4.37 (m, 5H, CH<sub>2</sub>-Bn), 4.15 (s, H-1 $\beta$ ), 4.02 (s, 1H), 3.93 (s, 1H), 3.87 – 3.77 (m, 2H), 3.65 – 3.51 (m, 2H), 3.50 – 3.31 (m, 2H), 3.30 – 3.15 (m, 2H, CH<sub>2</sub>), 1.62 – 1.46 (m, 4H, CH<sub>2</sub>), 1.36 – 1.29 (m, 2H, CH<sub>2</sub>). <sup>13</sup>C NMR (101 MHz, CDCl<sub>3</sub>)  $\delta$  156.7, 156.1, 138.3, 137.95, 137.89, 137.8, 137.7, 137.6, 136.9, 128.52, 128.49, 128.46, 128.43, 128.41, 128.3, 128.2, 128.1, 127.9, 127.87, 127.82, 127.78, 127.7, 127.6, 127.2, 102.4 (C-1 $\beta$ ), 98.2 (C-1 $\alpha$ ), 80.6, 77.3, 74.8, 74.6, 73.5, 72.5, 72.3, 72.2, 69.6, 68.8, 68.5, 68.1, 67.1, 63.4, 59.8, 50.5, 50.2, 47.1, 46.2, 31.9, 29.7, 29.4, 29.2, 29.1, 27.9, 27.5, 23.4, 23.2, 22.7. HRMS (ESI) calcd for C<sub>47</sub>H<sub>56</sub>N<sub>5</sub>O<sub>7</sub> [M+NH<sub>4</sub>]<sup>+</sup> 802.4174, found 802.4183.

**Phenyl 2-azido-3,4-di-O-benzyl-2-deoxy-6-O-levulinoyl-1-seleno- $\alpha$ -D-galactopyranoside (S3)**

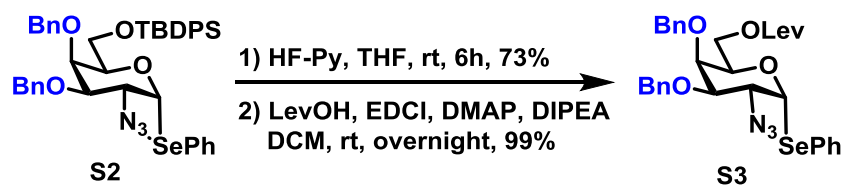

The **S2**<sup>2</sup> (244 mg, 0.32 mmol) was dissolved in anhydrous THF (1 mL), and HF/pyridine (70%, 0.29 mL, 3.20 mmol) was added dropwise. The resulting mixture was stirred for 6 h at room temperature, the reaction mixture was then quenched with Et<sub>3</sub>N, diluted with ethyl acetate and washed with saturated NaHCO<sub>3</sub> solution and brine. The organic layer was concentrated under vacuum. The residue was purified by column chromatography on silica gel (petroleum ether-EtOAc, 4:1) to give the intermediate (121.6 mg, 73%). To a solution of the above intermediate (121.6 mg, 0.23 mmol) and levulinic acid (LevOH) (53.8 mg, 0.46 mmol) in anhydrous DCM (1 mL) was added 4-dimethylaminopyridine (DMAP) (5.7 mg, 0.046 mmol), *N*-(3-dimethylamino-propyl)-*N*'-ethylcarbodiimide hydrochloride (EDCI) (133.3 mg, 0.70 mmol) and *N,N*-diisopropylethylamine (DIPEA) (0.11 mL, 0.70 mmol). The resulting mixture was stirred overnight at room temperature. Upon completion, the solvent was evaporated *in vacuo*. The residue was purified by column chromatography on silica gel (petroleum ether-EtOAc, 3.5:1) to afford **S3** (143 mg, 99%) as a white solid.  $[\alpha]_{\text{D}}^{25} = +321.5$  (c 0.15, CHCl<sub>3</sub>). <sup>1</sup>H NMR (400 MHz, CDCl<sub>3</sub>)  $\delta$  7.62 – 7.55 (m, 2H, Ar), 7.47 – 7.24 (m, 13H, Ar), 5.96 (d, *J* = 5.4 Hz, 1H, H-1), 4.92 (d, *J* = 11.3 Hz, 1H, CH<sub>2</sub>-Bn), 4.78 (s, 2H, CH<sub>2</sub>-Bn), 4.57 (d, *J* = 11.3 Hz, 1H, CH<sub>2</sub>-Bn), 4.41 – 4.33 (m, 2H, H-2), 4.16 – 4.08 (m, 2H), 3.96 (s, 1H, H-4), 3.73 (dd, *J* = 10.4, 2.6 Hz, 1H, H-3), 2.66 (t, *J* = 6.5 Hz, 2H, CH<sub>2</sub>-Lev), 2.46 – 2.40 (m, 2H, CH<sub>2</sub>-Lev), 2.14 (s, 3H, CH<sub>3</sub>-Lev). <sup>13</sup>C NMR (101 MHz, CDCl<sub>3</sub>)  $\delta$  206.5, 172.4, 137.9, 137.3, 134.53, 134.48, 129.1, 128.7, 128.5, 128.3, 128.21, 128.18, 128.0, 127.9, 85.2 (C-1), 80.2, 74.8, 72.8, 72.7, 71.0, 63.2, 60.9, 37.9, 29.9, 27.7. HRMS (ESI) calcd for C<sub>31</sub>H<sub>33</sub>N<sub>3</sub>O<sub>6</sub>SeNa [M+Na]<sup>+</sup> 640.1486, found 640.1475.

***N*-(Benzyl)benzyloxycarbonyl-5-amino-pentyl 2-azido-3,4-di-*O*-benzyl-2-deoxy-6-*O*-levulinoyl-D-galactopyranoside (19c)**

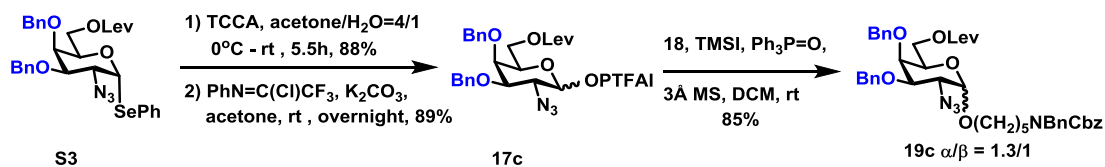

To a solution of compound **S3** (143 mg, 0.23 mmol) in acetone/H<sub>2</sub>O (4.5 mL/1.1 mL) was added Trichloroisocyanuric acid (TCCA) (53.3 mg, 0.23 mmol) at 0 °C. The reaction mixture was warmed gradually to room temperature and stirred for 5.5 h. Then EtOAc was added to this mixture and washed sequentially with saturated aqueous NaHCO<sub>3</sub>, H<sub>2</sub>O, and brine. The organic phase was dried by Na<sub>2</sub>SO<sub>4</sub> and concentrated *in vacuo*. Purification by flash chromatography (petroleum ether-EtOAc, 2:1 to 1.5:1) afforded hemiacetal intermediate (97.8 mg, 88%). The above intermediate (97.8 mg, 0.20 mmol) and 2,2,2-trifluoro-*N*-phenylacetimidoyl chloride (50.4 mg, 0.24 mmol) was dissolved in acetone (0.5 mL), and K<sub>2</sub>CO<sub>3</sub> (42 mg, 0.30 mmol) was added. The reaction was stirred overnight at room temperature, then filtered and concentrated *in vacuo*. The residue was purified by flash column chromatography (petroleum ether-EtOAc, 6:1 to 3:1, containing 2% Et<sub>3</sub>N) to give **17c** (118 mg, 89%) (Compound **17c** was used directly without further structural characterization). The glycosylation reaction was carried out according to **General Experimental Procedures** at rt for 3d, using donor **17c** (118 mg, 0.18 mmol), acceptor **18** (89.6 mg, 0.27 mmol), DCM (1.8 mL), Ph<sub>3</sub>P=O (304.7 mg, 1.10 mmol) and TMSI (26 μL, 0.18 mmol). The product was purified by silica gel column chromatography (PE-EA, 2.5:1) to afford **19c** (122.4 mg, 85%, α/β = 1.3:1) as a colorless syrup. <sup>1</sup>H NMR (400 MHz, CDCl<sub>3</sub>) δ 7.44 – 7.24 (m, 19H, Ar), 7.19 -7.15 (m, 1H, Ar), 5.24 – 5.11 (m, 2H, CH<sub>2</sub>-Cbz), 4.96 – 4.90 (m, 1H, CH<sub>2</sub>-Bn ), 4.89 – 4.85 (m, 1H, H-1α), 4.80 – 4.70 (m, 2H, CH<sub>2</sub>-Bn), 4.62 (d, *J* = 11.5 Hz, CH<sub>2</sub>-Bn β), 4.57 (d, *J* = 11.3 Hz, 1H, CH<sub>2</sub>-Bn α) 4.52 – 4.47 (m, 1H), 4.23 (dd, *J* = 11.1, 6.3 Hz), 4.19 – 4.14 (m, 1H), 4.13 – 4.09 (m, 1H), 3.98 – 3.78 (m, 3H), 3.68 – 3.55 (m, 1H),

3.52 – 3.18 (m, 4H, CH<sub>2</sub>), 2.74 – 2.64 (m, 2H, CH<sub>2</sub>-Lev), 2.54 – 2.42 (m, 2H, CH<sub>2</sub>-Lev), 2.17 (s, 1H, CH<sub>3</sub>-Lev β), 2.16 (s, 2H, CH<sub>3</sub>-Lev α), 1.64 – 1.47 (m, 4H, CH<sub>2</sub>), 1.39 – 1.28 (m, 2H, CH<sub>2</sub>). <sup>13</sup>C NMR (101 MHz, CDCl<sub>3</sub>) δ 206.4, 206.3, 172.4, 172.3, 156.7, 156.2, 138.1, 138.03, 137.99, 137.6, 137.5, 136.9, 128.59, 128.56, 128.54, 128.47, 128.4, 128.33, 128.29, 128.0, 127.95, 127.92, 127.89, 127.84, 127.83, 127.80, 127.3, 102.4 (C-1β), 98.2 (C-1α), 80.6, 77.3, 74.7, 74.5, 73.1, 72.7, 72.4, 72.0, 71.8, 69.8, 68.6, 68.2, 67.2, 63.4, 63.3, 62.9, 59.7, 53.5, 50.5, 50.3, 47.2, 46.2, 37.9, 37.8, 29.8, 29.7, 29.4, 29.2, 29.1, 27.82, 27.78, 27.5, 23.4, 23.2, 22.7. HRMS (ESI) calcd for C<sub>45</sub>H<sub>56</sub>N<sub>5</sub>O<sub>9</sub> [M+NH<sub>4</sub>]<sup>+</sup> 810.4073, found 810.4074.

***N*-(Benzyl)benzyloxycarbonyl-5-amino-pentyl 2-azido-3,4-di-*O*-benzyl-6-*O*-tert-butylidiphenylsilyl-2-deoxy-D-galactopyranoside (19d)**

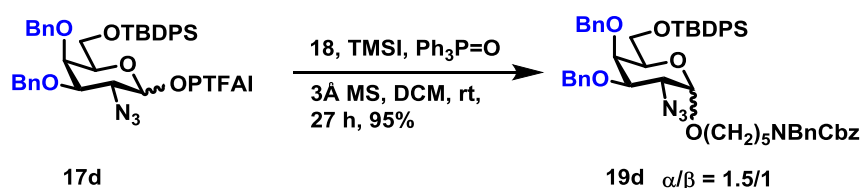

The glycosylation reaction was carried out according to **General Experimental Procedures** at 30 °C for 27 h, using donor **17d**<sup>3</sup> (103 mg, 0.13 mmol) (Compound **17d** was used directly without further structural characterization), acceptor **18** (63.6 mg, 0.19 mmol), DCM 1.3 mL, Ph<sub>3</sub>P=O (216.4 mg, 0.78 mmol) and TMSI (19 μL, 0.13 mmol). The product was purified by silica gel column chromatography (PE-EA, 10:1 to 7:1) to afford **19d** (114.5 mg, 95%, α/β = 1.5:1) as a yellowish syrup. <sup>1</sup>H NMR (400 MHz, CDCl<sub>3</sub>) δ 7.65 – 7.57 (m, 4H, Ar), 7.44 – 7.11 (m, 26H, Ar), 5.21 – 5.12 (m, 2H, CH<sub>2</sub>-Cbz), 4.90 (t, J = 10.8 Hz, 1H, CH<sub>2</sub>-Bn), 4.82 (s, 1H, H-1α), 4.76 – 4.67 (m, 2H, CH<sub>2</sub>-Bn), 4.58 (t, J = 10.4 Hz, 1H, CH<sub>2</sub>-Bn), 4.53 – 4.43 (m, 2H, CH<sub>2</sub>-Bn), 4.09 (s, H-1β), 4.03 (s), 3.97 – 3.87 (m, 1H), 3.83 – 3.68 (m, 4H, H-2α, H-2β), 3.56 – 3.44 (m, 1H), 3.38 – 3.12 (m, 4H, CH<sub>2</sub>), 1.61 – 1.44 (m, 4H, CH<sub>2</sub>), 1.34 – 1.26 (m, 2H, CH<sub>2</sub>), 1.05 (s, 9H, CH<sub>3</sub>-*t*-Bu). <sup>13</sup>C NMR (101 MHz, CDCl<sub>3</sub>) δ 138.54, 138.46, 138.0, 137.9, 137.8, 136.9, 135.62, 135.59, 133.35, 133.25, 129.9, 128.63, 128.61, 128.58, 128.52, 128.3, 128.2, 128.1, 128.03, 128.96, 127.92, 127.91, 127.85, 127.81, 127.7, 127.6,



127.3, 102.5 (C-1 $\beta$ ), 98.1 (C-1 $\alpha$ ), 80.6, 77.4, 75.0, 74.9, 74.8, 73.6, 72.7, 72.6, 72.4, 71.2, 69.7, 67.9, 67.3, 67.2, 63.5, 62.7, 62.3, 60.0, 50.6, 50.3, 47.2, 46.3, 29.8, 29.3, 29.2, 27.0, 23.5, 23.3, 19.3. HRMS (ESI) calcd for C<sub>56</sub>H<sub>68</sub>N<sub>5</sub>O<sub>7</sub>Si [M+NH<sub>4</sub>]<sup>+</sup> 950.4883, found 950.4888.

**Phenyl 2-azido-4-O-benzoyl-3,6-di-O-benzyl-2-deoxy-1-seleno- $\alpha$ -D-galactopyranoside (S5)**

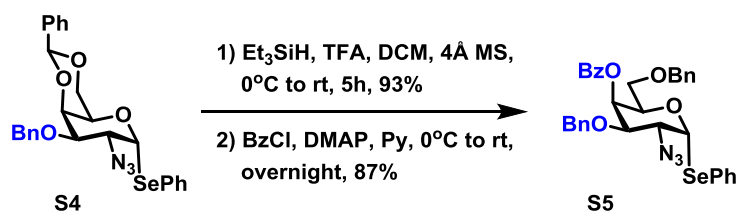

To a solution of the **S4**<sup>1</sup> (110.7 mg, 0.21 mmol) in new-distilled DCM (1 mL) was stirred over fresh-dried 4Å molecular sieves under argon at room temperature for 15 min. Then the solution was cooled to 0 °C, Et<sub>3</sub>SiH (0.34 mL, 2.12 mmol) and trifluoroacetic acid (TFA) (0.16 mL, 2.12 mmol) was added respectively. The resulting mixture was allowed to warm to room temperature and stirred for 5 h. Upon completion, the reaction mixture was quenched with Et<sub>3</sub>N, filtered and concentrated under vacuum. The residue was purified by column chromatography on silica gel (PE:EA = 6:1) to afford the intermediate (103.4 mg, 93%). The above intermediate (103 mg, 0.20 mmol) was dissolved in anhydrous pyridine (1 mL). The solution was cooled to 0 °C, DMAP (24 mg, 0.20 mmol) was added, then BzCl (0.03 mL, 0.29 mmol) was added slowly. The resulting mixture was allowed to warm to room temperature and stirred overnight. Upon completion, the reaction mixture was diluted in EA, washed with 3M HCl, saturated NaHCO<sub>3</sub> solution and brine. The combined organic layer was concentrated under vacuum. The residue was purified by column chromatography on silica gel (PE:EA = 10:1) to afford **S5** (110.4 mg, 87%) as colorless syrup.  $[\alpha]_D^{23} = +226.6$  (c 0.23, CHCl<sub>3</sub>). <sup>1</sup>H NMR (400 MHz, CDCl<sub>3</sub>)  $\delta$  8.04 (d, *J* = 7.7 Hz, 2H, Ar), 7.62 (d, *J* = 7.5 Hz, 2H, Ar), 7.56 (t, *J* = 7.4 Hz, 1H, Ar), 7.43 (t, *J* = 7.6 Hz, 2H, Ar), 7.36 (d, *J* = 7.2 Hz, 2H, Ar), 7.32 – 7.16 (m, 11H, Ar), 6.00 (d,

$J = 5.4$  Hz, 1H, H-1), 5.94 (d,  $J = 3.2$  Hz, 1H, H-4), 4.90 (d,  $J = 10.7$  Hz, 1H, CH<sub>2</sub>-Bn), 4.71 (t,  $J = 6.4$  Hz, 1H, H-5), 4.56 (d,  $J = 10.8$  Hz, 1H, CH<sub>2</sub>-Bn), 4.47 – 4.33 (m, 2H, CH<sub>2</sub>-Bn), 4.23 (dd,  $J = 10.3, 5.4$  Hz, 1H, H-2), 3.86 (dd,  $J = 10.2, 3.2$  Hz, 1H, H-3), 3.62 – 3.42 (m, 2H, H-6). <sup>13</sup>C NMR (101 MHz, CDCl<sub>3</sub>)  $\delta$  165.6, 137.6, 137.0, 135.14, 135.08, 133.4, 129.9, 129.7, 129.2, 128.6, 128.5, 128.4, 128.3, 128.13, 128.09, 128.05, 127.9, 127.8, 85.3 (C-1), 77.4, 73.7, 71.8, 70.9, 68.3, 66.9, 60.8. HRMS (ESI) calcd for C<sub>33</sub>H<sub>35</sub>N<sub>4</sub>O<sub>5</sub>Se [M+NH<sub>4</sub>]<sup>+</sup> 641.1827, found 641.1821.

***N*-(Benzyl)benzyloxycarbonyl-5-amino-pentyl 2-azido-4-*O*-benzoyl-3,6-di-*O*-benzyl-2-deoxy-*D*-galactopyranoside (19e)**

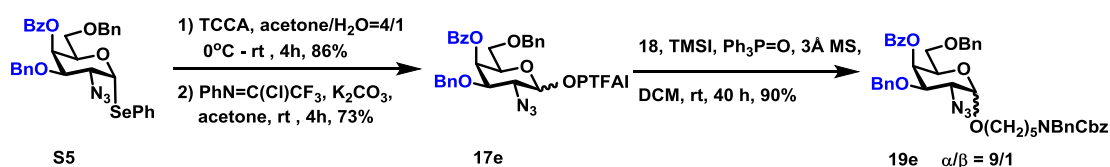

To a solution of compound **S5** (153 mg, 0.24 mmol) in acetone/H<sub>2</sub>O (4.9 mL/1.2 mL) was added TCCA (56.6 mg, 0.24 mmol) at 0 °C. The reaction mixture was warmed gradually to room temperature and stirred for 4 h. Then EtOAc was added to this mixture and washed sequentially with saturated aqueous NaHCO<sub>3</sub>, H<sub>2</sub>O, and brine. The organic phase was dried by Na<sub>2</sub>SO<sub>4</sub> and concentrated *in vacuo*. Purification by flash chromatography (petroleum ether-EtOAc, 10:1 to 5:1) afforded hemiacetal intermediate (102.9 mg, 86%). The above intermediate (102.9 mg, 0.21 mmol) and 2, 2, 2-trifluoro-*N*-phenylacetimidoyl chloride (52.4 mg, 0.25 mmol) was dissolved in acetone (0.5 mL), and K<sub>2</sub>CO<sub>3</sub> (43.8 mg, 0.32 mmol) was added. The reaction was stirred at room temperature for 4 h, then filtered and concentrated *in vacuo*. The residue was purified by flash column chromatography (petroleum ether containing 2% Et<sub>3</sub>N) to give **17e** (101.6 mg, 73%) (Compound **17e** was used directly without further structural characterization). The glycosylation reaction was carried out according to **General Experimental Procedures** at room temperature for 40 h, using donor **17e** (101.6 mg, 0.15 mmol), acceptor **18** (75.1 mg, 0.23 mmol), DCM (1.5 mL), Ph<sub>3</sub>P=O (255.3 mg, 0.92 mmol) and TMSI (22  $\mu$ L, 0.15 mmol). The product was purified by

silica gel column chromatography (PE-EA, 10:1 to 5:1) to afford **19e** (111.2 mg, 90%,  $\alpha/\beta = 9:1$ ) as a colorless syrup.  $[\alpha]_D^{25} = +105.1$  (c 0.26,  $\text{CHCl}_3$ ).  $^1\text{H NMR}$  (400 MHz,  $\text{CDCl}_3$ )  $\delta$  8.04 (d,  $J = 8.1$  Hz, 2H, Ar), 7.58 – 7.15 (m, 23H, Ar), 5.92 (s, 1H, H-4 $\alpha$ ), 5.80 (s, H-4 $\beta$ ), 5.23 – 5.07 (m, 2H,  $\text{CH}_2\text{-Cbz}$ ), 4.96 (s, 1H, H-1 $\alpha$ ), 4.92 – 4.76 (m, 1H,  $\text{CH}_2\text{-Bn}$ ), 4.59 – 4.35 (m, 5H,  $\text{CH}_2\text{-Bn}$ ), 4.19 (s, 1H), 4.12 – 4.00 (m, 1H, H-3 $\alpha$ ), 3.79 – 3.35 (m, 5H, H-2 $\alpha$ ), 3.27 – 3.20 (m, 2H,  $\text{CH}_2$ ), 1.68 – 1.47 (m, 4H,  $\text{CH}_2$ ), 1.42 – 1.27 (m, 2H,  $\text{CH}_2$ ).  $^{13}\text{C NMR}$  (101 MHz,  $\text{CDCl}_3$ )  $\delta$  165.7, 156.8, 156.3, 138.0, 137.7, 137.2, 136.9, 133.3, 130.1, 129.9, 129.8, 129.6, 128.62, 128.60, 128.5, 128.4, 128.3, 128.00, 127.95, 127.91, 127.89, 127.8, 127.4, 102.5 (C-1 $\beta$ ), 98.2 (C-1 $\alpha$ ), 77.4, 74.4, 73.8, 73.7, 72.7, 71.8, 71.7, 68.6, 68.4, 68.2, 67.4, 67.2, 66.2, 63.1, 59.6, 50.6, 50.3, 47.2, 46.2, 29.8, 29.1, 27.9, 27.5, 23.4, 23.2. HRMS (ESI) calcd for  $\text{C}_{47}\text{H}_{54}\text{N}_5\text{O}_8$   $[\text{M}+\text{NH}_4]^+$  816.3967, found 816.3968.

**Phenyl 2-azido-3-O-benzoyl-4,6-di-O-benzyl-2-deoxy-1-seleno- $\alpha$ -D-galactopyranoside (S7)**

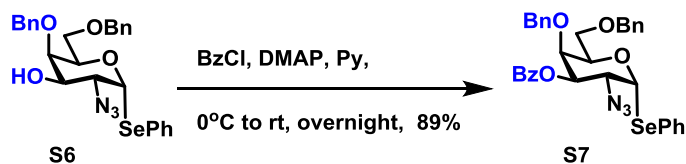

To a solution of compound **S6**<sup>3</sup> (93.4 mg, 0.18 mmol) in anhydrous pyridine (1.3 mL) was cooled to  $0^\circ\text{C}$ ,  $\text{DMAP}$  (21.8 mg, 0.18 mmol) was added, then  $\text{BzCl}$  (0.04 mL, 0.36 mmol) was added slowly. The resulting mixture was allowed to warm to room temperature and stirred overnight. Upon completion, the reaction mixture was diluted in EA, washed with 4M  $\text{HCl}$ , saturated  $\text{NaHCO}_3$  solution and brine. The combined organic layer was concentrated under vacuum. The residue was purified by column chromatography on silica gel (PE:EA = 20:1) to afford **S7** (98.8 mg, 89%) as colorless syrup.  $[\alpha]_D^{23} = +318.5$  (c 0.20,  $\text{CHCl}_3$ ).  $^1\text{H NMR}$  (400 MHz,  $\text{CDCl}_3$ )  $\delta$  8.07 (d,  $J = 7.7$  Hz, 2H, Ar), 7.61 (d,  $J = 7.5$  Hz, 3H, Ar), 7.46 (t,  $J = 7.6$  Hz, 2H, Ar), 7.35 – 7.13 (m, 13H, Ar), 6.01 (d,  $J = 5.4$  Hz, 1H, H-1), 5.29 (dd,  $J = 10.8, 2.9$  Hz, 1H, H-3), 4.65 – 4.55 (m, 3H, H-2, H-5,  $\text{CH}_2\text{-Bn}$ ), 4.51 – 4.37 (m, 3H,  $\text{CH}_2\text{-Bn}$ ), 4.28 (d,

$J = 2.9$  Hz, 1H, H-4), 3.61 (dd,  $J = 9.6, 7.0$  Hz, 1H, H-6), 3.48 (dd,  $J = 9.5, 6.1$  Hz, 1H, H-6).  $^{13}\text{C}$  NMR (101 MHz,  $\text{CDCl}_3$ )  $\delta$  165.7, 137.9, 137.7, 135.0, 133.7, 130.0, 129.20, 129.16, 128.7, 128.5, 128.4, 128.2, 128.05, 128.03, 127.96, 127.91, 127.87, 127.85, 85.1 (C-1), 75.4, 74.7, 74.3, 73.5, 71.7, 68.1, 60.0. HRMS (ESI) calcd for  $\text{C}_{33}\text{H}_{31}\text{N}_3\text{O}_5\text{SeNa}$   $[\text{M}+\text{Na}]^+$  646.1381, found 646.1385.

***N*-(Benzyl)benzyloxycarbonyl-5-amino-pentyl 2-azido-3-*O*-benzoyl-4,6-di-*O*-benzyl-2-deoxy-*D*-galactopyranoside (19f)**

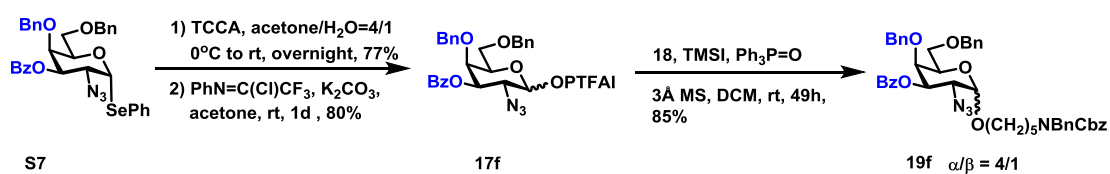

To a solution of **S7**<sup>3</sup> (300 mg, 0.48 mmol) in acetone/ $\text{H}_2\text{O}$  (9.6 mL/2.4 mL) was cooled to 0 °C, and TCCA (166 mg, 0.72 mmol) was added. The resulting mixture was stirred overnight at room temperature. The solution was diluted with EtOAc, washed with saturated  $\text{NaHCO}_3$ , water and brine, dried over anhydrous  $\text{Na}_2\text{SO}_4$ , filtered and concentrated *in vacuo*. The residue was purified by flash column chromatography (petroleum ether-EtOAc, 4:1) to give the intermediate (180 mg, 77%). The above intermediate (180 mg, 0.37 mmol) and 2,2,2-trifluoro-*N*-phenylacetimidoyl chloride (114 mg, 0.55 mmol) was dissolved in acetone (3 mL), and  $\text{K}_2\text{CO}_3$  (76 mg, 0.55 mmol) was added. The reaction was stirred 1d at room temperature, then filtered and concentrated *in vacuo*. The residue was purified by flash column chromatography (petroleum ether containing 2%  $\text{Et}_3\text{N}$ ) to give **17f** (190 mg, 80%) (Compound **17f** was used directly without further structural characterization). The glycosylation reaction was carried out according to **General Experimental Procedures** at rt for 49 h, using donor **17f** (170 mg, 0.26 mmol), acceptor **18** (126 mg, 0.39 mmol) with DCM (2.6 mL),  $\text{Ph}_3\text{P=O}$  (429 mg, 1.54 mmol) and TMSI (36  $\mu\text{L}$ , 0.26 mmol). The product was purified by silica gel column chromatography (PE-EA, 5:1) to afford **19f** (172 mg, 85%,  $\alpha/\beta = 4:1$ ) as a colorless syrup.  $^1\text{H}$  NMR (400 MHz,  $\text{CDCl}_3$ )  $\delta$  8.07 (d,  $J = 7.7$  Hz, 2H, Ar), 7.59 (t,  $J = 7.4$  Hz,

1H, Ar), 7.45 (t,  $J = 7.7$  Hz, 2H, Ar), 7.40 – 7.14 (m, 20H, Ar), 5.55 (dd,  $J = 11.1, 2.9$  Hz, 1H, H-3), 5.17 (d,  $J = 11.9$  Hz, 2H, CH<sub>2</sub>-Cbz), 4.98 (m, 1H), 4.65 (d,  $J = 11.3$  Hz, 1H, CH<sub>2</sub>-Bn), 4.53 – 4.41 (m, 5H, CH<sub>2</sub>-Bn), 4.37 – 4.29 (m, H-1 $\beta$ ), 4.21 (s, 1H, H-4), 4.16 – 4.08 (m, 1H, H-5), 3.93 (dd,  $J = 11.1, 3.5$  Hz, 1H, H-2), 3.74 – 3.63 (m, 1H, CH<sub>2</sub>), 3.62 – 3.53 (m, 2H, H-6), 3.48 – 3.34 (m, 1H, CH<sub>2</sub>), 3.31 – 3.16 (m, 2H, CH<sub>2</sub>), 1.64 – 1.48 (m, 4H, CH<sub>2</sub>), 1.40 – 1.27 (m, 2H, CH<sub>2</sub>). <sup>13</sup>C NMR (101 MHz, CDCl<sub>3</sub>)  $\delta$  165.8, 156.8, 156.2, 138.0, 137.85, 137.81, 136.9, 133.5, 130.0, 129.4, 128.6, 128.5, 128.5, 128.4, 128.3, 128.2, 128.04, 128.96, 127.91, 127.87, 127.83, 127.78, 127.3, 102.4 (C-1 $\beta$ ), 98.3 (C-1 $\alpha$ ), 77.4, 75.3, 75.2, 74.9, 74.4, 73.6, 73.5, 73.4, 71.8, 70.0, 69.3, 68.5, 68.2, 67.2, 61.8, 60.4, 58.4, 50.6, 50.3, 47.2, 46.3, 41.4, 31.6, 29.2, 28.0, 27.7, 27.6, 23.4, 23.2, 22.72, 22.70. HRMS (ESI) calcd for C<sub>47</sub>H<sub>50</sub>N<sub>4</sub>O<sub>8</sub>Na [M+Na]<sup>+</sup> 821.3521, found 821.3522.

**Phenyl 2-azido-3,4-di-*O*-benzoyl-6-*O*-benzyl-2-deoxy-1-seleno- $\alpha$ -D-galactopyranoside (S10)**

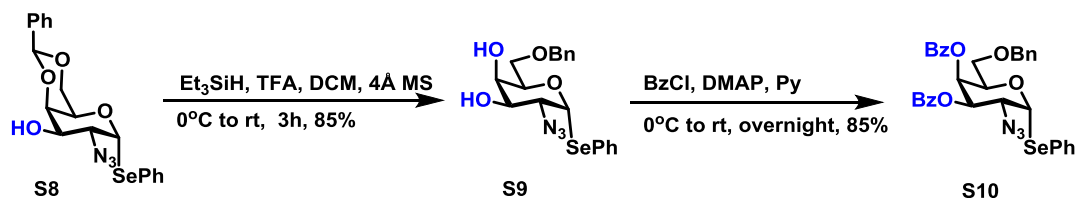

To a solution of the **S8**<sup>3</sup> (5.88 g, 13.60 mmol) in new-distilled DCM (67 mL) was stirred over fresh-dried 4Å molecular sieves under argon at room temperature for 15 min. Then the solution was cooled to 0 °C, Et<sub>3</sub>SiH (21.7 mL, 135.96 mmol) and TFA (10.5 mL, 135.96 mmol) was added respectively. The resulting mixture was allowed to warm to room temperature and stirred for 3 h. Upon completion, the reaction mixture was quenched with Et<sub>3</sub>N, filtered and concentrated under vacuum. The residue was purified by column chromatography on silica gel (PE:EA = 2.5:1) to afford the intermediate **S9** (4.99 g, 85%). The above intermediate (5.56 g, 12.80 mmol) was dissolved in anhydrous pyridine (42 mL). The solution was cooled to 0 °C, DMAP (1.56 g, 12.80 mmol) was added, then BzCl (4.5 mL, 38.40 mmol) was added slowly. The resulting mixture was allowed to warm to room temperature and stirred

overnight. Upon completion, the reaction mixture was diluted in EA, washed with 3M HCl, saturated NaHCO<sub>3</sub> solution and brine. The combined organic layer was concentrated under vacuum. The residue was purified by column chromatography on silica gel (PE:EA = 10:1) to afford **S10** (7.50 g, 85%) as white solid.  $[\alpha]_D^{23} = +182.4$  (c 0.20, CHCl<sub>3</sub>). <sup>1</sup>H NMR (400 MHz, CDCl<sub>3</sub>)  $\delta$  7.98 – 7.93 (m, 2H, Ar), 7.92 – 7.86 (m, 2H, Ar), 7.69 – 7.63 (m, 2H, Ar), 7.59 (t,  $J = 7.3$  Hz, 1H), 7.52 (t,  $J = 7.5$  Hz, 1H, Ar), 7.44 (t,  $J = 7.7$  Hz, 2H, Ar), 7.35 (t,  $J = 7.7$  Hz, 2H, Ar), 7.31 – 7.26 (m, 1H, Ar), 7.25 – 7.17 (m, 7H, Ar), 6.12 (d,  $J = 5.4$  Hz, 1H, H-1), 5.96 (d,  $J = 3.2$  Hz, 1H, H-4), 5.48 (dd,  $J = 10.8, 3.2$  Hz, 1H, H-3), 4.90 (t,  $J = 6.3$  Hz, 1H, H-5), 4.51 (dd,  $J = 10.8, 5.5$  Hz, 1H, H-2), 4.46 – 4.32 (m, 2H, CH<sub>2</sub>-Bn), 3.63 – 3.50 (m, 2H, H-6). <sup>13</sup>C NMR (101 MHz, CDCl<sub>3</sub>)  $\delta$  165.4, 165.3, 137.6, 135.3, 133.6, 133.5, 129.9, 129.3, 128.7, 128.5, 128.4, 128.3, 127.84, 127.79, 84.9 (C-1), 73.6, 72.2, 70.7, 68.5, 68.1, 59.9. HRMS (ESI) calcd for C<sub>33</sub>H<sub>29</sub>N<sub>3</sub>O<sub>6</sub>SeK [M+K]<sup>+</sup> 676.0913, found 676.0904.

***N*-(Benzyl)benzyloxycarbonyl-5-amino-pentyl 2-azido-3,4-di-*O*-benzoyl-6-*O*-benzyl-2-deoxy-D-galactopyranoside (19a)**

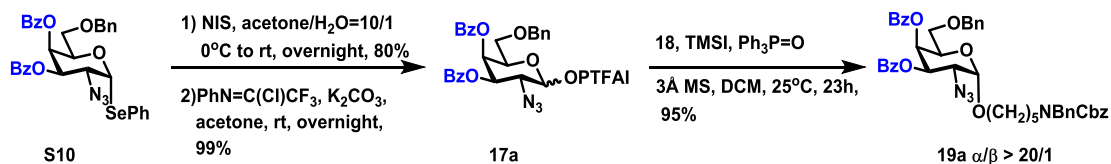

Compound **S10** (1.02 g, 1.59 mmol) was dissolved in acetone/H<sub>2</sub>O (14 mL/1.4 mL), then *N*-iodosuccinimide (NIS) (537.4 mg, 2.39 mmol) was added. The resulting mixture was allowed to warm to room temperature and stirred overnight. The solution was diluted with EtOAc, washed with saturated Na<sub>2</sub>S<sub>2</sub>O<sub>3</sub>, water and brine, dried over anhydrous Na<sub>2</sub>SO<sub>4</sub>, filtered and concentrated *in vacuo*. The residue was purified by flash column chromatography (petroleum ether-EtOAc, 4:1) to give the intermediate (637.8 mg, 80%). The above intermediate (637.8 mg, 1.27 mmol) and 2,2,2-trifluoro-*N*-phenylacetimidoyl chloride (289.2 mg, 1.39 mmol) was dissolved in acetone (2 mL), and K<sub>2</sub>CO<sub>3</sub> (262.5 mg, 1.90 mmol) was added. The reaction was stirred overnight at room temperature, then filtered and concentrated *in vacuo*. The

residue was purified by flash column chromatography (petroleum ether, containing 2% Et<sub>3</sub>N) to give **17a** (843 mg, 99%) (Compound **17a** was used directly without further structural characterization). The glycosylation reaction was carried out according to **General Experimental Procedure** at 25°C for 23 h, using acceptor **18** (120.2 mg, 0.37 mmol) with **17a** (165.1 mg, 0.24 mmol), DCM (2.4 mL), Ph<sub>3</sub>P=O (408.6 mg, 1.47 mmol) and TMSI (35 μL, 0.24 mmol). The product was purified by silica gel column chromatography (PE-EA, 4:1) to afford **19a** (188.5 mg, 95%, α/β >20:1) as a colorless syrup.  $[\alpha]_D^{23} = +137.0$  (c 0.25, CHCl<sub>3</sub>). <sup>1</sup>H NMR (400 MHz, CDCl<sub>3</sub>) δ 7.98 (d, *J* = 7.8 Hz, 2H, Ar), 7.88 (d, *J* = 7.7 Hz, 2H, Ar), 7.58 (t, *J* = 7.4 Hz, 1H, Ar), 7.51 – 7.40 (m, 3H, Ar), 7.39 – 7.12 (m, 17H, Ar), 5.93 (s, 1H, H-4), 5.78 – 5.73 (m, 1H, H-3), 5.23 – 5.07 (m, 3H, CH<sub>2</sub>-Cbz, H-1), 4.50 (d, *J* = 10.9 Hz, 3H, CH<sub>2</sub>-Bn), 4.42 – 4.33 (m, 2H, CH<sub>2</sub>-Bn, H-5), 3.87 – 3.70 (m, 2H, H-2, CH<sub>2</sub>), 3.64 – 3.40 (m, 3H, H-6, CH<sub>2</sub>), 3.35 – 3.16 (m, 2H, CH<sub>2</sub>), 1.73 – 1.48 (m, 4H, CH<sub>2</sub>), 1.45 – 1.29 (m, 2H, CH<sub>2</sub>). <sup>13</sup>C NMR (101 MHz, CDCl<sub>3</sub>) δ 165.4, 156.8, 156.3, 138.0, 137.6, 136.9, 133.4, 133.3, 129.9, 129.83, 129.80, 129.5, 129.3, 128.6, 128.5, 128.4, 128.3, 128.2, 127.9, 127.8, 127.71, 127.67, 127.3, 102.6 (C-1β), 98.4 (C-1α), 77.4, 73.6, 69.1, 69.0, 68.6, 68.31, 68.27, 67.2, 58.3, 50.6, 50.4, 47.2, 46.2, 29.7, 29.1, 27.9, 27.6, 23.4. HRMS (ESI) calcd for C<sub>47</sub>H<sub>52</sub>N<sub>5</sub>O<sub>9</sub> [M+NH<sub>4</sub>]<sup>+</sup> 830.3760, found 830.3763.

#### Glycosylation between **17a** and **18** using TMSI only

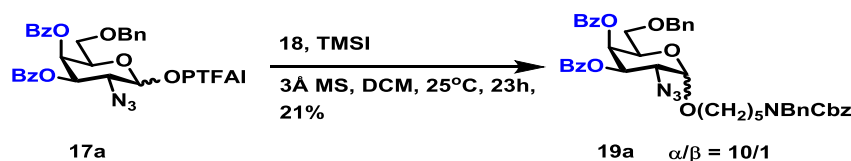

A mixture of donor **17a** (165 mg, 0.24 mmol) and acceptor *N*-(benzyl)benzyloxycarbonyl-5-aminopentanol **18** (120.1 mg, 0.37 mmol) was co-evaporated with dry toluene for three times. Then the mixture was dissolved in new distilled DCM (2.4 mL) and stirred over fresh-dried 3Å molecular sieves under argon at room temperature for 15 min, then TMSI (35 μL, 0.24 mmol) was added dropwise to the mixture. After being stirred for another 23 h at room temperature, the reaction was

quenched with Na<sub>2</sub>S<sub>2</sub>O<sub>3</sub> aq. The organic phase was washed with water and brine, dried over anhydrous Na<sub>2</sub>SO<sub>4</sub>, filtered and concentrated *in vacuo*. The products were purified by flash column chromatography (petroleum ether-EtOAc, 4:1) to afford **19a** (42.3 mg, 21%,  $\alpha/\beta = 10:1$ ) as a syrup.

### Glycosylation between **17a** and **18** using TMSOTf instead of TMSI and Ph<sub>3</sub>PO

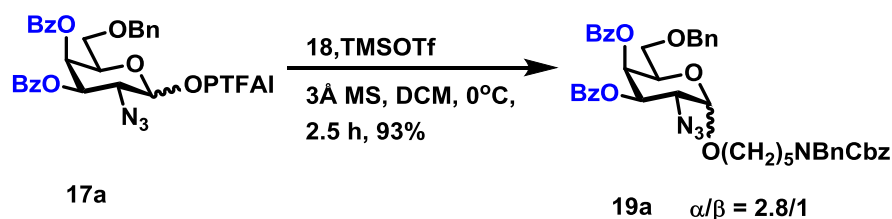

A mixture of donor **17a** (132.5 mg, 0.20 mmol) and acceptor **18** *N*-(benzyl)benzyloxycarbonyl-5-aminopentanol (96.5 mg, 0.29 mmol) was co-evaporated with anhydrous toluene for three times. Then the mixture was dissolved in new distilled DCM (2.0 mL) and stirred over fresh-dried 3 Å molecular sieves under argon at room temperature for 15 min, then cooled to 0 °C, trimethylsilyl trifluoromethanesulfonate (TMSOTf) (7  $\mu$ L, 0.039 mmol) was added dropwise to the mixture. After being stirred for another 2.5 h, the reaction was quenched with Et<sub>3</sub>N and filtered. The filtrates were concentrated *in vacuo* to give a residue, which was purified by flash column chromatography (petroleum ether-EtOAc, 3.5:1) to afford **19a** (148.4 mg, 93%,  $\alpha/\beta = 2.8:1$ ) as a syrup.

### Reaction scope of GalN<sub>3</sub> PTFAI donors

**Phenyl 2-azido-3,4-di-*O*-benzoyl-2-deoxy-6-*O*-levulinoyl-1-seleno- $\alpha$ -D-galactopyranoside (S14)**



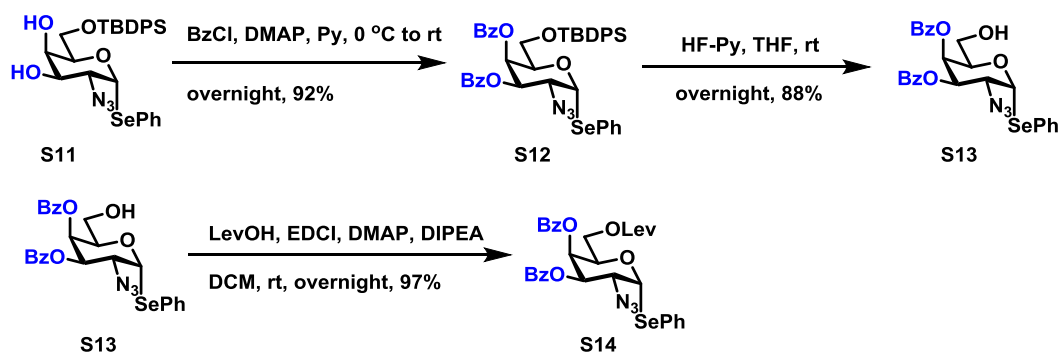

Compound **S11**<sup>3</sup> (2.17 g, 3.73 mmol) was dissolved in anhydrous pyridine (12 mL). The solution was cooled to  $0\text{ }^\circ\text{C}$ , DMAP (456.0 mg, 3.73 mmol) was added, then  $\text{BzCl}$  (1.3 mL, 11.20 mmol) was added slowly. The resulting mixture was allowed to warm to room temperature and stirred overnight. Upon completion, the reaction mixture was diluted in EA, washed with 3M  $\text{HCl}$ , saturated  $\text{NaHCO}_3$  solution and brine. The combined organic layer was concentrated under vacuum. The residue was purified by column chromatography on silica gel (PE:EA = 10:1) to afford **S12** (2.71 g, 92%).  $[\alpha]_{\text{D}}^{24} = +271.6$  (c 0.22,  $\text{CHCl}_3$ ).  $^1\text{H}$  NMR (400 MHz,  $\text{CDCl}_3$ )  $\delta$  7.96 (d,  $J = 7.8$  Hz, 2H, Ar), 7.92 (d,  $J = 7.8$  Hz, 2H, Ar), 7.62 (t,  $J = 7.4$  Hz, 3H, Ar), 7.56 (d,  $J = 7.5$  Hz, 2H, Ar), 7.49 (d,  $J = 7.4$  Hz, 1H, Ar), 7.47 – 7.32 (m, 9H, Ar), 7.24 (q,  $J = 6.8$  Hz, 2H, Ar), 7.17 (t,  $J = 7.4$  Hz, 2H, Ar), 7.08 (t,  $J = 7.5$  Hz, 2H, Ar), 6.12 (d,  $J = 3.2$  Hz, 1H, H-4), 6.05 (d,  $J = 5.4$  Hz, 1H, H-1), 5.57 (dd,  $J = 10.8, 3.2$  Hz, 1H, H-3), 4.74 (t,  $J = 7.2$  Hz, 1H, H-5), 4.48 (dd,  $J = 10.8, 5.4$  Hz, 1H, H-2), 3.71 (t,  $J = 9.2$  Hz, 1H, H-6), 3.55 (dd,  $J = 10.0, 5.9$  Hz, 1H, H-6), 0.98 (s, 9H,  $\text{CH}_3$ -*t*-Bu).  $^{13}\text{C}$  NMR (101 MHz,  $\text{CDCl}_3$ )  $\delta$  165.4, 165.2, 135.6, 135.54, 135.50, 135.2, 133.44, 133.40, 132.9, 132.5, 129.92, 129.87, 129.8, 129.74, 129.67, 129.29, 129.26, 128.7, 128.5, 128.2, 127.91, 127.88, 127.8, 127.7, 84.7 (C-1), 72.2, 71.7, 67.7, 61.0, 60.0, 26.8, 19.1. HRMS (ESI) calcd for  $\text{C}_{42}\text{H}_{45}\text{N}_4\text{O}_6\text{SeSi}$   $[\text{M}+\text{NH}_4]^+$  803.2328, found 803.2325.

The **S12** (1.48 g, 1.89 mmol) was then dissolved in anhydrous THF (6.0 mL), and HF/pyridine (70%, 1.7 mL, 18.68 mmol) was added dropwise. The resulting mixture was stirred overnight at room temperature, the reaction mixture was then quenched with  $\text{Et}_3\text{N}$ , diluted with ethyl acetate and washed with saturated  $\text{NaHCO}_3$  solution and brine. The organic layer was concentrated under vacuum. The residue

was purified by column chromatography on silica gel (PE:EA = 4:1) to give **S13** (913.4 mg, 88%,). To a solution of **S13** (460 mg, 0.83 mmol) and levulinic acid (145 mg, 1.25 mmol) in anhydrous DCM (8.3 mL) was added 4-dimethylaminopyridine (DMAP) (101.7 mg, 0.83 mmol), *N*-(3-dimethylaminopropyl)-*N'*-ethylcarbodiimide hydrochloride (EDCI) (287.3 mg, 1.50 mmol) and *N,N*-diisopropylethylamine (DIPEA) (0.41 mL, 2.50 mmol). The resulting mixture was stirred overnight at room temperature. Upon completion, the solvent was evaporated *in vacuo*. The residue was purified by column chromatography on silica gel (petroleum ether-EtOAc, 5:1) to afford **S14** (522.8 mg, 97%).  $[\alpha]_D^{21} = +376.2$  (c 0.12, CHCl<sub>3</sub>). <sup>1</sup>H NMR (400 MHz, CDCl<sub>3</sub>) δ 8.00 – 7.95 (m, 2H, Ar), 7.90 – 7.86 (m, 2H, Ar), 7.70 – 7.65 (m, 2H, Ar), 7.61 (t, *J* = 7.4 Hz, 1H, Ar), 7.53 (t, *J* = 7.5 Hz, 1H, Ar), 7.45 (t, *J* = 7.7 Hz, 2H, Ar), 7.38 – 7.30 (m, 5H, Ar), 6.16 (d, *J* = 5.4 Hz, 1H, H-1), 5.90 (d, *J* = 3.2 Hz, 1H, H-4), 5.47 (dd, *J* = 10.8, 3.3 Hz, 1H, H-3), 4.89 (t, *J* = 6.5 Hz, 1H, H-5), 4.53 (dd, *J* = 10.8, 5.4 Hz, 1H, H-2), 4.25 – 4.11 (m, 2H, H-6), 2.66 (t, *J* = 6.6 Hz, 2H, CH<sub>2</sub>-Lev), 2.47 (t, *J* = 6.7 Hz, 2H, CH<sub>2</sub>-Lev), 2.14 (s, 3H, CH<sub>3</sub>-Lev). <sup>13</sup>C NMR (101 MHz, CDCl<sub>3</sub>) δ 206.2, 172.2, 165.34, 165.32, 134.9, 133.8, 133.6, 129.92, 129.90, 129.4, 129.2, 129.1, 128.8, 128.5, 128.4, 127.8, 84.5 (C-1), 71.9, 69.6, 68.0, 62.1, 59.7, 37.9, 29.9, 29.8, 27.8. HRMS (ESI) calcd for C<sub>31</sub>H<sub>29</sub>N<sub>3</sub>O<sub>8</sub>SeNa [M+Na]<sup>+</sup> 668.1072, found 668.1067.

***N*-(Benzyl)benzyloxycarbonyl-5-amino-pentyl 2-azido-3,4-di-*O*-benzoyl-2-deoxy-6-*O*-levulinoyl-D-galactopyranoside (**19g**)**

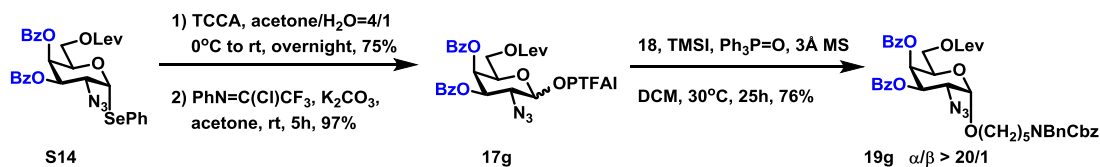

To a solution of **S14** (522.8 mg, 0.80 mmol) in acetone/H<sub>2</sub>O (16 mL/4 mL) was cooled to 0 °C, and TCCA (186.8 mg, 0.80 mmol) was added. The resulting mixture was stirred overnight at room temperature. The solution was diluted with EtOAc, washed with saturated NaHCO<sub>3</sub>, water and brine, dried over anhydrous Na<sub>2</sub>SO<sub>4</sub>, filtered and concentrated *in vacuo*. The residue was purified by flash column

---

chromatography (petroleum ether-EtOAc, 2.5:1 to 1:1) to give the intermediate (306.2 mg, 75%). The above intermediate (306.0 mg, 0.60 mmol) and 2,2,2-trifluoro-*N*-phenylacetimidoyl chloride (149.0 mg, 0.72 mmol) was dissolved in acetone (1.0 mL), and K<sub>2</sub>CO<sub>3</sub> (124.0 mg, 0.90 mmol) was added. The reaction was stirred for 5h at room temperature, then filtered and concentrated *in vacuo*. The residue was purified by flash column chromatography (petroleum ether-EtOAc, 10:1 to 3.2:1, containing 2% Et<sub>3</sub>N) to give **17g** (395.3 mg, 97%) (Compound **17g** was used directly without further structural characterization). The glycosylation reaction was carried out according to **General Experimental Procedure** at 30°C for 25 h, using donor **17g** (195.5 mg, 0.29 mmol), acceptor **18** (140.7 mg, 0.43 mmol) with DCM (2.8 mL), Ph<sub>3</sub>P=O (478.2 mg, 1.72 mmol) and TMSI (41 μL, 0.29 mmol). The product was purified by silica gel column chromatography (PE-EA, 2:1) to afford **19g** (179.0 mg, 76%, α/β >20:1) as a colorless syrup.  $[\alpha]_D^{25} = +174.6$  (c 0.17, CHCl<sub>3</sub>). <sup>1</sup>H NMR (400 MHz, CDCl<sub>3</sub>) δ 7.99 (d, *J* = 7.8 Hz, 2H, Ar), 7.87 (d, *J* = 7.7 Hz, 2H, Ar), 7.60 (t, *J* = 7.4 Hz, 1H, Ar), 7.53 – 7.42 (m, 3H, Ar), 7.42 – 7.15 (m, 12H, Ar), 5.86 (s, 1H, H-4), 5.74 (d, *J* = 10.8 Hz, 1H, H-3), 5.26 – 5.05 (m, 3H, CH<sub>2</sub>-Cbz, H-1), 4.57 – 4.48 (m, 2H, CH<sub>2</sub>-Bn), 4.45 – 4.33 (m, 1H), 4.30 – 4.21 (m, 1H), 4.20 – 4.08 (m, 1H), 3.89 – 3.70 (m, 2H, H-2, CH<sub>2</sub>), 3.60 – 3.41 (m, 1H, CH<sub>2</sub>), 3.35 – 3.16 (m, 2H, CH<sub>2</sub>), 2.68 (t, *J* = 6.5 Hz, 2H, CH<sub>2</sub>-Lev), 2.52 (t, *J* = 6.6 Hz, 2H, CH<sub>2</sub>-Lev), 2.13 (s, 3H, CH<sub>3</sub>-Lev), 1.75 – 1.50 (m, 4H, CH<sub>2</sub>), 1.47 – 1.31 (m, 2H, CH<sub>2</sub>). <sup>13</sup>C NMR (101 MHz, CDCl<sub>3</sub>) δ 206.7, 206.2, 172.1, 165.32, 165.27, 156.6, 156.1, 149.7, 137.9, 136.8, 135.9, 133.5, 133.3, 129.7, 129.1, 129.0, 128.6, 128.5, 128.41, 128.38, 128.3, 127.85, 127.77, 127.2, 123.7, 98.3 (C-1), 68.7, 68.4, 67.1, 66.9, 62.1, 58.0, 53.5, 50.5, 50.3, 47.1, 46.2, 37.7, 30.8, 29.6, 29.0, 27.9, 27.8, 27.7, 27.5, 23.3. HRMS (ESI) calcd for C<sub>45</sub>H<sub>52</sub>N<sub>5</sub>O<sub>11</sub> [M+NH<sub>4</sub>]<sup>+</sup> 838.3658, found 838.3668.

***N*-(Benzyl)benzyloxycarbonyl-5-amino-pentyl 2-azido-3,4-di-*O*-benzoyl-6-*O*-*tert*-butyldiphenylsilyl-2-deoxy-D-galactopyranoside (19h)**

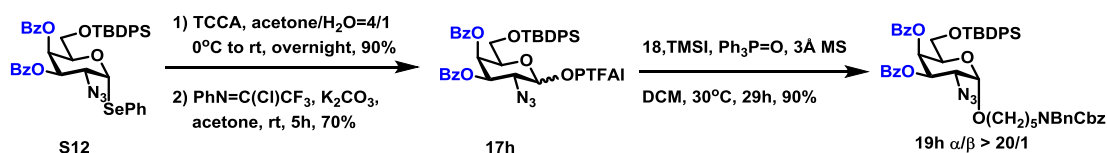

To a solution of **S12** (628.8 mg, 0.80 mmol) in acetone/H<sub>2</sub>O (16 mL/4 mL) was cooled to 0 °C, and TCCA (184.8 mg, 0.80 mmol) was added. The resulting mixture was stirred overnight at room temperature. The solution was diluted with EtOAc, washed with saturated NaHCO<sub>3</sub>, water and brine, dried over anhydrous Na<sub>2</sub>SO<sub>4</sub>, filtered and concentrated *in vacuo*. The residue was purified by flash column chromatography (petroleum ether-EtOAc, 4:1) to give the intermediate (466.0 mg, 90%). The above intermediate (466 mg, 0.72 mmol) and 2,2,2-trifluoro-*N*-phenylacetimidoyl chloride (178.1 mg, 0.86 mmol) was dissolved in acetone (1 mL), and K<sub>2</sub>CO<sub>3</sub> (148.2 mg, 1.07 mmol) was added. The reaction was stirred overnight at room temperature, then filtered and concentrated *in vacuo*. The residue was purified by flash column chromatography (petroleum ether-EtOAc, 50:1, containing 2% Et<sub>3</sub>N) to give **17h** (414 mg, 70%) (Compound **17h** was used directly without further structural characterization). The glycosylation reaction was carried out according to **General Experimental Procedure** at 30°C for 29 h, using acceptor **18** (121.8 mg, 0.37 mmol) with **17h** (204 mg, 0.25 mmol), DCM (2.5 mL), Ph<sub>3</sub>P=O (413.9 mg, 1.49 mmol) and TMSI (35 μL, 0.25 mmol). The product was purified by silica gel column chromatography (PE-EA, 6:1) to afford **19h** (215.5 mg, 90%, α/β > 20:1) as a colorless syrup.  $[\alpha]_D^{25} = +115.1$  (c 0.19, CHCl<sub>3</sub>). <sup>1</sup>H NMR (400 MHz, CDCl<sub>3</sub>) δ 7.97 (d, *J* = 7.7 Hz, 2H, Ar), 7.89 (d, *J* = 7.7 Hz, 2H, Ar), 7.65 (d, *J* = 6.8 Hz, 2H, Ar), 7.59 – 7.18 (m, 22H, Ar), 7.14 (t, *J* = 7.4 Hz, 2H, Ar), 6.04 (d, *J* = 3.4 Hz, 1H, H-4), 5.82 (d, *J* = 11.0 Hz, 1H, H-3), 5.20-5.07 (m, 3H), 4.52 (d, *J* = 10.7 Hz, 2H), 4.34 – 4.20 (m, 1H), 3.80 (dd, *J* = 11.1, 3.4 Hz, 1H, H-2), 3.77 – 3.62 (m, 3H), 3.52 – 3.36 (m, 1H), 3.35 – 3.18 (m, 2H), 1.70 – 1.51 (m, 4H, CH<sub>2</sub>), 1.46 – 1.30 (m, 2H, CH<sub>2</sub>), 1.01 (s, 9H, CH<sub>3</sub>-*t*-Bu). <sup>13</sup>C NMR (101 MHz, CDCl<sub>3</sub>) δ 165.4, 165.2, 156.7, 156.2, 137.9, 136.8, 135.5, 135.4, 133.3, 133.2, 132.9, 132.7, 129.81, 129.78, 129.73, 129.68, 129.6, 129.3, 128.5, 128.4, 128.2, 127.9, 127.81, 127.77, 127.74, 127.6, 127.3, 127.2, 98.3 (C-1), 77.2, 69.5, 69.1, 68.4, 67.2, 61.7, 58.3, 50.6, 50.3, 47.1, 46.2, 29.1, 27.9, 27.5,

26.7, 23.4, 19.0. HRMS (ESI) calcd for C<sub>56</sub>H<sub>64</sub>N<sub>5</sub>O<sub>9</sub>Si [M+NH<sub>4</sub>]<sup>+</sup> 978.4468, found 978.4469.

**Phenyl 6-O-acetyl-2-azido-3,4-di-O-benzoyl-2-deoxy-1-seleno- $\alpha$ -D-galactopyranoside (S15)**

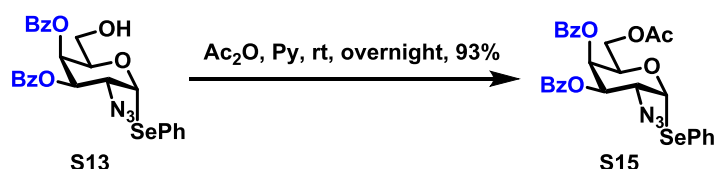

Compound **S13** (757 mg, 1.37 mmol) was dissolved in anhydrous pyridine (2.6 mL), then Ac<sub>2</sub>O (0.26 mL, 2.74 mmol) was added slowly. The resulting mixture was stirred overnight at room temperature. Upon completion, the reaction mixture was diluted in EA, washed with 4M HCl, saturated NaHCO<sub>3</sub> solution and brine. The combined organic layer was concentrated under vacuum. The residue was purified by column chromatography on silica gel (PE:EA = 5:1) to afford **S15** (760.9 mg, 93%) as white solid.  $[\alpha]_D^{23} = +443.6$  (c 0.14, CHCl<sub>3</sub>). <sup>1</sup>H NMR (400 MHz, CDCl<sub>3</sub>)  $\delta$  8.01 – 7.96 (m, 2H, Ar), 7.89 (d,  $J = 7.7$  Hz, 2H, Ar), 7.67 (dd,  $J = 7.2, 2.2$  Hz, 2H, Ar), 7.61 (t,  $J = 7.4$  Hz, 1H, Ar), 7.53 (t,  $J = 7.5$  Hz, 1H, Ar), 7.45 (t,  $J = 7.6$  Hz, 2H, Ar), 7.38 – 7.30 (m, 5H, Ar), 6.18 (d,  $J = 5.4$  Hz, 1H, H-1), 5.93 (d,  $J = 3.2$  Hz, 1H, H-4), 5.49 (dd,  $J = 10.8, 3.2$  Hz, 1H, H-3), 4.90 (t,  $J = 6.4$  Hz, 1H, H-5), 4.55 (dd,  $J = 10.8, 5.4$  Hz, 1H, H-2), 4.23 – 4.10 (m, 2H, H-6), 1.95 (s, 3H, CH<sub>3</sub>-Ac). <sup>13</sup>C NMR (101 MHz, CDCl<sub>3</sub>)  $\delta$  170.4, 165.4, 165.3, 135.0, 133.8, 133.6, 129.90, 129.86, 129.4, 129.0, 128.9, 128.8, 128.5, 128.4, 127.7, 84.3 (C-1), 72.0, 69.5, 68.0, 62.0, 59.6, 20.7. HRMS (ESI) calcd for C<sub>28</sub>H<sub>25</sub>N<sub>3</sub>O<sub>7</sub>SeNa [M+Na]<sup>+</sup> 612.0809, found 612.0817.

***N*-(Benzyl)benzyloxycarbonyl-5-amino-pentyl 6-O-acetyl-2-azido-3,4-di-O-benzoyl-2-deoxy-D-galactopyranoside (19i)**

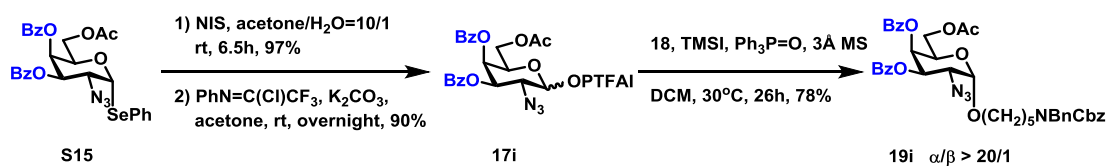

---

Compound **S15** (701 mg, 1.18 mmol) was dissolved in acetone/H<sub>2</sub>O (10 mL/1 mL) and NIS (397.9 mg, 1.77 mmol) was added. The resulting mixture was stirred for 6.5 h. The solution was diluted with EtOAc, washed with saturated Na<sub>2</sub>S<sub>2</sub>O<sub>3</sub>, water and brine, dried over anhydrous Na<sub>2</sub>SO<sub>4</sub>, filtered and concentrated *in vacuo*. The residue was purified by flash column chromatography (petroleum ether-EtOAc, 2:1) to give the intermediate (524 mg, 97%). The above intermediate (391 mg, 0.86 mmol) and 2,2,2-trifluoro-*N*-phenylacetimidoyl chloride (160.4 mg, 0.77 mmol) was dissolved in acetone (1 mL), and K<sub>2</sub>CO<sub>3</sub> (177.9 mg, 1.29 mmol) was added. The reaction was stirred overnight at room temperature, then filtered and concentrated *in vacuo*. The residue was purified by flash column chromatography (petroleum ether, containing 2% Et<sub>3</sub>N) to give **17i** (435.7 mg, 90%) (Compound **17i** was used directly without further structural characterization). The glycosylation reaction was carried out according to **General Experimental Procedure** at 30°C for 26 h, using acceptor **18** (158.9 mg, 0.49 mmol) with **17i** (202.0 mg, 0.32 mmol), DCM (3.2 mL), Ph<sub>3</sub>P=O (540.2 mg, 1.94 mmol) and TMSI (46 μL, 0.32 mmol). The product was purified by silica gel column chromatography (PE-EA, 3:1) to afford **19i** (193.4 mg, 78%, α/β >20:1) as a colorless syrup. [α]<sub>D</sub><sup>25</sup> = + 176.1 (c 0.26, CHCl<sub>3</sub>). <sup>1</sup>H NMR (400 MHz, CDCl<sub>3</sub>) δ 8.00 (d, *J* = 7.7 Hz, 2H, Ar), 7.87 (d, *J* = 7.7 Hz, 2H, Ar), 7.58 (t, *J* = 7.4 Hz, 1H, Ar), 7.51 – 7.41 (m, 3H, Ar), 7.40 – 7.17 (m, 12H, Ar), 5.89 (s, 1H, H-4), 5.75 (d, *J* = 10.9 Hz, 1H, H-3), 5.24 – 5.07 (m, 3H, H-1, CH<sub>2</sub>-Cbz), 4.52 (d, *J* = 6.7 Hz, 2H, CH<sub>2</sub>-Bn), 4.43 – 4.34 (m, 1H), 4.26 – 4.12 (m, 2H), 3.87 (dd, *J* = 11.1, 3.4 Hz, 1H, H-2), 3.81 – 3.68 (m, 1H, CH<sub>2</sub>), 3.59 – 3.43 (m, 1H, CH<sub>2</sub>), 3.35 – 3.19 (m, 2H, CH<sub>2</sub>), 1.99 (s, 3H, CH<sub>3</sub>-Ac), 1.75 – 1.50 (m, 4H, CH<sub>2</sub>), 1.46 – 1.31 (m, 2H, CH<sub>2</sub>). <sup>13</sup>C NMR (101 MHz, CDCl<sub>3</sub>) δ 170.3, 165.4, 156.7, 156.2, 137.9, 136.8, 133.6, 133.3, 129.9, 129.8, 129.2, 129.1, 128.6, 128.53, 128.45, 128.4, 128.3, 127.9, 127.8, 127.3, 98.4 (C-1), 68.8, 68.7, 68.5, 67.2, 67.0, 62.1, 58.1, 50.6, 50.3, 47.1, 46.2, 29.1, 27.9, 27.5, 23.4, 20.6. HRMS (ESI) calcd for C<sub>42</sub>H<sub>45</sub>N<sub>4</sub>O<sub>10</sub> [M+H]<sup>+</sup> 765.3130, found 765.3135.

***N*-(Benzyl)benzyloxycarbonyl-5-amino-pentyl 2-azido-3,4,6-tri-*O*-benzoyl-2-deoxy-*D*-galactopyranoside (19j)**

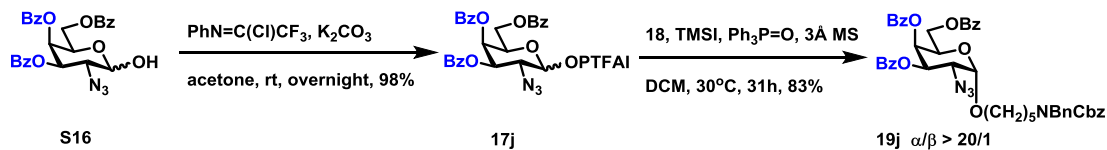

Compound **S16**<sup>4</sup> (592.8 mg, 1.15 mmol) and 2,2,2-trifluoro-*N*-phenylacetimidoyl chloride (261.6 mg, 1.26 mmol) was dissolved in acetone (2 mL), and K<sub>2</sub>CO<sub>3</sub> (238.3 mg, 1.72 mmol) was added. The reaction was stirred overnight at room temperature, then filtered and concentrated *in vacuo*. The residue was purified by flash column chromatography (petroleum ether, containing 2% Et<sub>3</sub>N) to give **17j** (774.5 mg, 98%) (Compound **17j** was used directly without further structural characterization). The glycosylation reaction was carried out according to **General Experimental Procedure** at 30°C for 31 h, using acceptor **18** (158.7 mg, 0.48 mmol) with **17j** (222.5 mg, 0.32 mmol), DCM 3.2 mL, Ph<sub>3</sub>P=O (539.5 mg, 1.94 mmol) and TMSI (47 μL, 0.32 mmol). The product was purified by silica gel column chromatography (PE-EA, 4:1) to afford **19j** (223.1 mg, 83%, α/β > 20:1) as a colorless syrup. [α]<sub>D</sub><sup>25</sup> = + 136.3 (c 0.28, CHCl<sub>3</sub>). <sup>1</sup>H NMR (400 MHz, CDCl<sub>3</sub>) δ 8.01 (m, 4H, Ar), 7.88 (d, *J* = 7.7 Hz, 2H, Ar), 7.60 – 7.53 (m, 1H, Ar), 7.51 – 7.40 (m, 4H, Ar), 7.40 – 7.15 (m, 14H, Ar), 6.01 (s, 1H, H-4), 5.82 (d, *J* = 10.4 Hz, 1H, H-3), 5.25 – 5.11 (m, 3H, CH<sub>2</sub>-Cbz, H-1), 4.62 – 4.45 (m, 4H, CH<sub>2</sub>-Bn), 4.36 (d, *J* = 10.6 Hz, 1H), 3.92 (d, *J* = 10.8 Hz, 1H, H-2), 3.82 – 3.68 (m, 1H, CH<sub>2</sub>), 3.58 – 3.42 (m, 1H, CH<sub>2</sub>), 3.33 – 3.17 (m, 2H, CH<sub>2</sub>), 1.74 – 1.45 (m, 4H, CH<sub>2</sub>), 1.41 – 1.27 (m, 2H, CH<sub>2</sub>). <sup>13</sup>C NMR (101 MHz, CDCl<sub>3</sub>) δ 165.9, 165.33, 165.27, 156.6, 156.1, 137.9, 136.8, 133.5, 133.3, 133.2, 129.9, 129.8, 129.73, 129.65, 129.6, 129.4, 129.1, 129.0, 128.6, 128.5, 128.4, 128.3, 127.8, 127.2, 98.3 (C-1), 68.8, 68.7, 68.6, 67.1, 67.1, 62.5, 58.1, 50.5, 50.2, 47.0, 46.1, 29.6, 29.0, 27.8, 27.4, 23.3. HRMS (ESI) calcd for C<sub>47</sub>H<sub>50</sub>N<sub>5</sub>O<sub>10</sub> [M+NH<sub>4</sub>]<sup>+</sup> 844.3552, found 844.3560.

**Phenyl 3,4-di-*O*-acetyl-2-azido-6-*O*-benzyl-2-deoxy-1-seleno- $\alpha$ -*D*-galactopyranoside (S17)**

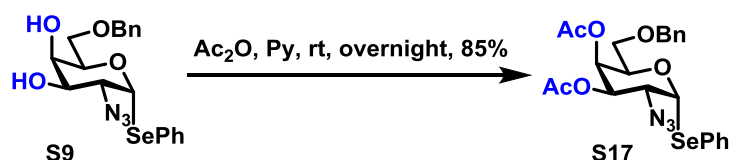

Compound **S9** (839 mg, 1.93 mmol) was dissolved in anhydrous pyridine (3.8 mL), then Ac<sub>2</sub>O (0.73 mL, 7.73 mmol) was added slowly. The resulting mixture was stirred overnight at room temperature. Upon completion, the reaction mixture was diluted in EA, washed with 4M HCl, saturated NaHCO<sub>3</sub> solution and brine. The combined organic layer was concentrated under vacuum. The residue was purified by column chromatography on silica gel (PE:EA = 6:1) to afford **S17** (820 mg, 85%) as white solid.  $[\alpha]_D^{23} = +27.7$  (c 0.19, CHCl<sub>3</sub>). <sup>1</sup>H NMR (400 MHz, CDCl<sub>3</sub>) δ 7.60 (d, *J* = 7.5 Hz, 2H, Ar), 7.36 – 7.22 (m, 6H, Ar), 7.18 (t, *J* = 7.5 Hz, 2H, Ar), 5.96 (d, *J* = 5.4 Hz, 1H, H-1), 5.54 (d, *J* = 3.2 Hz, 1H, H-4), 5.11 (dd, *J* = 10.9, 3.3 Hz, 1H, H-3), 4.66 (t, *J* = 6.3 Hz, 1H, H-5), 4.47 (d, *J* = 11.9 Hz, 1H, CH<sub>2</sub>-Bn), 4.38 (d, *J* = 12.0 Hz, 1H, CH<sub>2</sub>-Bn), 4.24 (dd, *J* = 10.9, 5.4 Hz, 1H, H-2), 3.49 – 3.38 (m, 2H, H-6), 2.22 – 1.93 (m, 6H, CH<sub>3</sub>-Ac). <sup>13</sup>C NMR (101 MHz, CDCl<sub>3</sub>) δ 170.0, 169.6, 137.6, 135.1, 129.2, 128.5, 128.2, 127.91, 127.88, 127.8, 84.6 (C-1), 73.5, 71.4, 70.2, 67.8, 67.7, 59.1, 20.74, 20.69. HRMS (ESI) calcd for C<sub>23</sub>H<sub>25</sub>N<sub>3</sub>O<sub>6</sub>SeNa [M+Na]<sup>+</sup> 536.0860, found 536.0863.

***N*-(Benzyl)benzyloxycarbonyl-5-amino-pentyl 3,4-di-*O*-acetyl-2-azido-6-*O*-benzyl-2-deoxy-D-galactopyranoside (19k)**

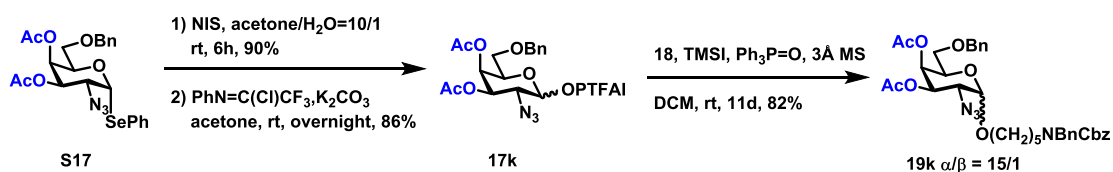

Compound **S17** (820 mg, 1.58 mmol) was dissolved in acetone/H<sub>2</sub>O (14 mL/1.4 mL), then NIS (533.8 mg, 2.37 mmol) was added. The resulting mixture was stirred for 6 h. The solution was diluted with EtOAc, washed with saturated Na<sub>2</sub>S<sub>2</sub>O<sub>3</sub>, water and brine, dried over anhydrous Na<sub>2</sub>SO<sub>4</sub>, filtered and concentrated *in vacuo*. The residue was purified by flash column chromatography (petroleum ether-EtOAc, 2:1)



to give the intermediate (539 mg, 90%). The above intermediate (539 mg, 1.42 mmol) and 2,2,2-trifluoro-*N*-phenylacetimidoyl chloride (294.9 mg, 1.42 mmol) was dissolved in acetone (1.4 mL), and K<sub>2</sub>CO<sub>3</sub> (294.5 mg, 2.13 mmol) was added. The reaction was stirred overnight at room temperature, then filtered and concentrated *in vacuo*. The residue was purified by flash column chromatography (petroleum ether, containing 2% Et<sub>3</sub>N) to give **17k** (671.6 mg, 86%) (Compound **17k** was used directly without further structural characterization). The glycosylation reaction was carried out according to **General Experimental Procedure** at rt for 11 d, using acceptor **18** (128.3 mg, 0.39 mmol) with **17k** (143.8 mg, 0.26 mmol), DCM 2.6 mL, Ph<sub>3</sub>P=O (436.1 mg, 1.57 mmol) and TMSI (37 μL, 0.26 mmol). The product was purified by silica gel column chromatography (PE-EA, 4:1) to afford **19k** (143.9 mg, 82%, α/β =15:1) as a colorless syrup. [α]<sub>D</sub><sup>25</sup> = +98.9 (c 0.17, CHCl<sub>3</sub>). <sup>1</sup>H NMR (400 MHz, CDCl<sub>3</sub>) δ 7.32 – 6.99 (m, 15H, Ar), 5.42 (d, *J* = 3.3 Hz, 1H, H-4α), 5.28 (dd, *J* = 11.1, 3.3 Hz, 1H, H-3α), 5.09 (d, *J* = 10.5 Hz, 2H, CH<sub>2</sub>-Cbz), 4.86 (s, 1H, H-1α), 4.68 (dd, *J* = 10.9, 3.3 Hz, H-3β), 4.48 – 4.28 (m, 4H, CH<sub>2</sub>-Bn), 4.11 – 4.01 (m, 1H, H-5α), 3.66 – 3.54 (m, 1H, CH<sub>2</sub>), 3.49 (dd, *J* = 11.1, 3.5 Hz, 1H, H-2α), 3.43 – 3.25 (m, 3H, H-6α, CH<sub>2</sub>), 3.22 – 3.08 (m, 2H, CH<sub>2</sub>), 1.95 (s, 6H, CH<sub>3</sub>-Ac), 1.58 – 1.36 (m, 4H, CH<sub>2</sub>), 1.32 – 1.20 (m, 2H, CH<sub>2</sub>). <sup>13</sup>C NMR (101 MHz, CDCl<sub>3</sub>) δ 170.0, 169.8, 156.7, 156.2, 138.0, 137.6, 136.9, 128.6, 128.5, 128.4, 127.92, 127.88, 127.82, 127.80, 127.3, 102.4 (C-1β), 98.1 (C-1α), 73.6, 73.5, 72.1, 71.2, 70.3, 68.5, 68.4, 68.2, 67.9, 67.8, 67.5, 67.2, 67.0, 61.2, 57.6, 50.6, 50.3, 47.1, 46.2, 29.4, 29.2, 29.0, 27.9, 27.5, 23.4, 23.2, 22.7, 20.70, 20.66, 20.6. HRMS (ESI) calcd for C<sub>37</sub>H<sub>48</sub>N<sub>5</sub>O<sub>9</sub> [M+NH<sub>4</sub>]<sup>+</sup> 706.3447, found 706.3449.

**Phenyl 3,4-di-*O*-acetyl-2-azido-6-*O*-*tert*-butyldiphenylsilyl-2-deoxy-1-seleno- $\alpha$ -D-galactopyranoside (S18)**

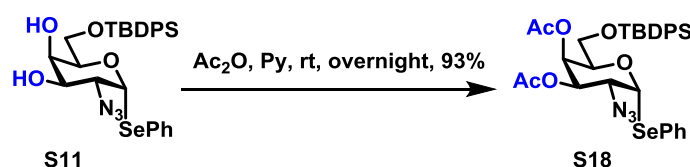

Compound **S11** (1.58 g, 2.71 mmol) was dissolved in anhydrous pyridine (5.4 mL), then Ac<sub>2</sub>O (1.0 mL, 10.84 mmol) was added slowly. The resulting mixture was stirred overnight at room temperature. Upon completion, the reaction mixture was diluted in EA, washed with 4M HCl, saturated NaHCO<sub>3</sub> solution and brine. The combined organic layer was concentrated under vacuum. The residue was purified by column chromatography on silica gel (PE:EA = 10:1) to afford **S18** (1.68 g, 93%) as yellow solid.  $[\alpha]_D^{23} = +184.2$  (c 0.25, CHCl<sub>3</sub>). <sup>1</sup>H NMR (400 MHz, CDCl<sub>3</sub>) δ 7.62 – 7.57 (m, 4H, Ar), 7.52 – 7.47 (m, 2H, Ar), 7.44 – 7.33 (m, 6H, Ar), 7.26 – 7.21 (m, 1H, Ar), 7.15 (t, *J* = 7.5 Hz, 2H, Ar), 5.89 (d, *J* = 5.4 Hz, 1H, H-1), 5.68 – 5.64 (m, 1H, H-4), 5.16 (dd, *J* = 10.8, 3.2 Hz, 1H, H-3), 4.51 (t, *J* = 7.0 Hz, 1H, H-5), 4.21 (dd, *J* = 10.9, 5.4 Hz, 1H, H-2), 3.57 (dd, *J* = 10.0, 8.1 Hz, 1H, H-6), 3.49 (dd, *J* = 10.0, 5.9 Hz, 1H, H-6), 2.07 (s, 3H, CH<sub>3</sub>-Ac), 2.03 (s, 3H, CH<sub>3</sub>-Ac), 1.02 (s, 9H, CH<sub>3</sub>-*t*-Bu). <sup>13</sup>C NMR (101 MHz, CDCl<sub>3</sub>) δ 169.7, 169.6, 135.6, 135.5, 135.0, 132.9, 132.7, 129.9, 129.1, 128.1, 127.80, 127.78, 127.7, 84.5 (C-1), 71.4, 71.2, 67.0, 60.9, 59.1, 26.7, 20.7, 20.5, 19.1. HRMS (ESI) calcd for C<sub>32</sub>H<sub>37</sub>N<sub>3</sub>O<sub>6</sub>SeSiK [M+K]<sup>+</sup> 700.1308, found 700.1308.

***N*-(Benzyl)benzyloxycarbonyl-5-amino-pentyl 3,4-di-*O*-acetyl-2-azido-6-*O*-*tert*-butyldiphenylsilyl-2-deoxy-*D*-galactopyranoside (191)**

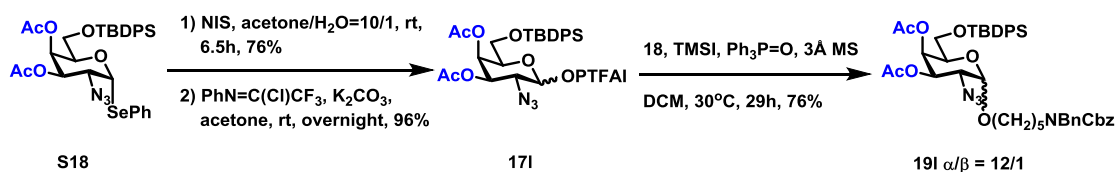

Compound **S18** (470 mg, 0.70 mmol) was dissolved in acetone/H<sub>2</sub>O (6.4 mL/0.6 mL), then NIS (212.8 mg, 0.95 mmol) was added. The resulting mixture was stirred for 6.5 h. The solution was diluted with EtOAc, washed with saturated Na<sub>2</sub>S<sub>2</sub>O<sub>3</sub>, water and brine, dried over anhydrous Na<sub>2</sub>SO<sub>4</sub>, filtered and concentrated *in vacuo*. The residue was purified by flash column chromatography (petroleum ether-EtOAc, 6:1) to give the intermediate (282.3 mg, 76%). The above intermediate (220.3 mg, 0.42 mmol) and 2,2,2-trifluoro-*N*-phenylacetimidoyl chloride (103.9 mg, 0.50 mmol) was

dissolved in acetone (1.0 mL), and  $K_2CO_3$  (86.4 mg, 0.63 mmol) was added. The reaction was stirred overnight at room temperature, then filtered and concentrated *in vacuo*. The residue was purified by flash column chromatography (petroleum ether, containing 2%  $Et_3N$ ) to give **17I** (280 mg, 96%) (Compound **17I** was used directly without further structural characterization). The glycosylation reaction was carried out according to **General Experimental Procedure** at 30°C for 29 h, using acceptor **18** (93.3 mg, 0.28 mmol) with **17I** (132.7 mg, 0.19 mmol), DCM (1.9 mL),  $Ph_3P=O$  (317.1 mg, 1.14 mmol) and TMSI (27  $\mu$ L, 0.19 mmol). The product was purified by silica gel column chromatography (PE-EA, 4:1) to afford **19I** (120.8 mg, 76%,  $\alpha/\beta = 12:1$ ) as a colorless syrup.  $[\alpha]_D^{25} = +62.5$  (c 0.25,  $CHCl_3$ ).  $^1H$  NMR (400 MHz,  $CDCl_3$ )  $\delta$  7.62 (t,  $J = 7.1$  Hz, 4H, Ar), 7.43 – 7.15 (m, 16H, Ar), 5.59 (d,  $J = 3.3$  Hz, 1H, H-4 $\alpha$ ), 5.52 (d,  $J = 3.3$  Hz, H-4 $\beta$ ) 5.40 (dd,  $J = 11.2, 3.2$  Hz, 1H, H-3 $\alpha$ ), 5.18 (d,  $J = 12.0$  Hz, 2H,  $CH_2$ -Cbz), 4.90 (s, 1H, H-1 $\alpha$ ), 4.50 (d,  $J = 8.5$  Hz, 2H,  $CH_2$ -Bn), 4.10 – 4.02 (m, 1H, H-5 $\alpha$ ), 3.73 – 3.59 (m, 3H, H-6 $\alpha$ ,  $CH_2$ ), 3.55 (dd,  $J = 11.2, 3.5$  Hz, 1H, H-2), 3.42 – 3.16 (m, 3H,  $CH_2$ ), 2.04 (s, 3H,  $CH_3$ -Ac), 2.00 (s, 3H,  $CH_3$ -Ac), 1.65 – 1.47 (m, 4H,  $CH_2$ ), 1.39 – 1.28 (m, 2H,  $CH_2$ ), 1.03 (s, 9H,  $CH_3$ -*t*-Bu).  $^{13}C$  NMR (101 MHz,  $CDCl_3$ )  $\delta$  169.84, 169.80, 156.7, 156.2, 137.9, 136.8, 135.6, 135.5, 133.0, 132.9, 129.9, 129.8, 128.52, 128.50, 128.4, 127.84, 127.81, 127.77, 127.74, 127.3, 102.3 (C-1 $\beta$ ), 98.0 (C-1 $\alpha$ ), 73.2, 69.1, 68.4, 68.3, 67.7, 67.1, 66.4, 61.6, 61.2, 57.6, 53.4, 50.6, 50.3, 47.1, 46.2, 29.0, 27.9, 27.5, 26.7, 23.3, 20.7, 20.6, 19.0. HRMS (ESI) calcd for  $C_{46}H_{60}N_5O_9Si$   $[M+NH_4]^+$  854.4155, found 854.4156.

***N*-(Benzyl)benzyloxycarbonyl-5-amino-pentyl 3,4,6-tri-*O*-acetyl-2-azido-2-deoxy-D-galactopyranoside (19m)**

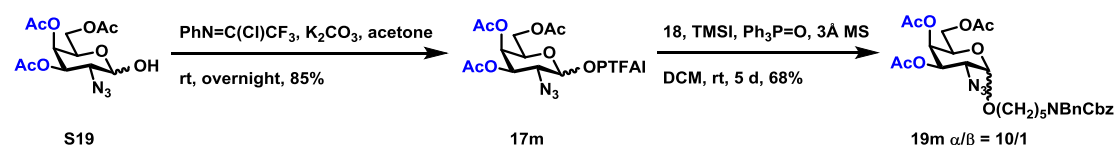

The compound **S19**<sup>1</sup> (285.7 mg, 0.86 mmol) and 2,2,2-trifluoro-*N*-phenylacetimidoyl chloride (214.8 mg, 1.03 mmol) was dissolved in acetone (1.5 mL), and  $K_2CO_3$  (178.7 mg, 1.29 mmol) was added. The reaction was stirred overnight at room

temperature, then filtered and concentrated *in vacuo*. The residue was purified by flash column chromatography (petroleum ether-EtOAc, 12:1 to 4:1, containing 1% Et<sub>3</sub>N) to give **17m** (368 mg, 85%) (Compound **17m** was used directly without further structural characterization). The glycosylation reaction was carried out according to **General Experimental Procedure** at rt for 5 d, using acceptor **18** (196.5 mg, 0.60 mmol) with **17m** (201 mg, 0.40 mmol), DCM (4.4 mL), Ph<sub>3</sub>P=O (668.1 mg, 2.40 mmol) and TMSI (57 μL, 0.40 mmol). The product was purified by silica gel column chromatography (PE-EA, 4:1) to afford **19m** (167 mg, 68%, α/β =10:1) as a colorless syrup.  $[\alpha]_D^{25} = +95.1$  (c 0.46, CHCl<sub>3</sub>). <sup>1</sup>H NMR (400 MHz, CDCl<sub>3</sub>) δ 7.33 – 7.04 (m, 10H, Ar), 5.36 (s, 1H, H-4α), 5.27 (d, *J* = 11.5 Hz, 1H, H-3α), 5.08 (d, *J* = 12.9 Hz, 2H, CH<sub>2</sub>-Cbz), 4.86 (s, 1H, H-1α), 4.69 (d, *J* = 11.0 Hz, H-3β), 4.47 – 4.35 (m, 2H, CH<sub>2</sub>-Bn), 4.15 – 3.93 (m, 3H), 3.64 – 3.46 (m, 2H, H-2α), 3.43 – 3.26 (m, 1H), 3.25 – 3.10 (m, 2H, CH<sub>2</sub>), 2.04 (s, 3H, CH<sub>3</sub>-Ac), 1.95 (s, 3H, CH<sub>3</sub>-Ac), 1.92 (s, 3H, CH<sub>3</sub>-Ac), 1.59 – 1.38 (m, 4H, CH<sub>2</sub>), 1.32 – 1.18 (m, 2H, CH<sub>2</sub>). <sup>13</sup>C NMR (101 MHz, CDCl<sub>3</sub>) δ 170.1, 169.92, 169.89, 169.6, 156.6, 156.1, 137.9, 136.8, 128.4, 128.3, 127.84, 127.81, 127.7, 127.2, 102.2 (C-1β), 98.0 (C-1α), 70.9, 70.5, 70.2, 68.5, 68.1, 67.6, 67.0, 66.5, 66.3, 61.6, 61.2, 60.9, 57.3, 50.5, 50.3, 47.0, 46.1, 29.6, 29.0, 28.9, 27.8, 27.4, 23.2, 23.0, 20.51, 20.46. HRMS (ESI) calcd for C<sub>32</sub>H<sub>41</sub>N<sub>4</sub>O<sub>10</sub> [M+H]<sup>+</sup> 641.2817, found 641.2810.

**Phenyl 2-azido-4-O-benzoyl-6-O-benzyl-3-O-levulinoyl-2-deoxy-1-seleno-α-D-galactopyranoside (S21)**

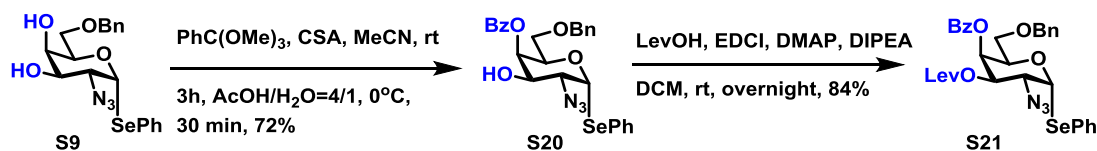

Compound **S9** (152 mg, 0.35 mmol) was stirred with trimethyl orthobenzoate (0.52 mL, 2.80 mmol) in acetonitrile (1.7 mL) at room temperature for some time. Then 10-camphorsulfonic acid (CSA) (24.4 mg, 0.11 mmol) was added, and the reaction mixture was stirred at room temperature for 3 h. The solvent was then removed under reduced pressure, and the temperature was brought down to 0 °C, 80%

aq acetic acid (1.7 mL) was then added, and the reaction was stirred at 0 °C for 30 min. The reaction mixture was quenched carefully with saturated NaHCO<sub>3</sub>. The product was extracted with dichloromethane (25 mL × 3), and the combined organic layer was washed with distilled water (100 mL × 1). The organic layer was dried over anhydrous sodium sulfate, and the solvent was removed under reduced pressure. The residue was purified by column chromatography on silica gel (petroleum ether-EtOAc, 8:1) to afford the intermediate **S20** (135.5 mg, 72%). To a solution of the above intermediate (56.1 mg, 0.10 mmol) and levulinic acid (18.1 mg, 0.16 mmol) in anhydrous DCM (1 mL) was added DMAP (12.7 mg, 0.10 mmol), EDCI (36.0 mg, 0.19 mmol) and DIPEA (0.051 mL, 0.31 mmol). The resulting mixture was stirred overnight at room temperature. Upon completion, the solvent was evaporated under vacuum. The residue was purified by column chromatography on silica gel (petroleum ether-EtOAc, 4.3:1) to afford **S21** (55.8 mg, 84%).  $[\alpha]_D^{24} = +210.3$  (c 0.32, CHCl<sub>3</sub>). <sup>1</sup>H NMR (400 MHz, CDCl<sub>3</sub>) δ 8.07 – 8.00 (m, 2H, Ar), 7.66 – 7.58 (m, 3H, Ar), 7.46 (t, *J* = 7.7 Hz, 2H, Ar), 7.30 – 7.15 (m, 8H, Ar), 6.05 (d, *J* = 5.4 Hz, 1H, H-1), 5.78 (d, *J* = 3.7 Hz, 1H, H-4), 5.22 (dd, *J* = 10.8, 3.2 Hz, 1H, H-3), 4.79 (t, *J* = 6.4 Hz, 1H, H-5), 4.42 (d, *J* = 11.9 Hz, 1H, CH<sub>2</sub>-Bn), 4.37 – 4.30 (m, 2H, H-2, CH<sub>2</sub>-Bn), 3.57 – 3.45 (m, 2H, H-6), 2.87 – 2.77 (m, 1H, CH<sub>2</sub>-Lev), 2.75 – 2.66 (m, 1H, CH<sub>2</sub>-Lev), 2.65 – 2.55 (m, 1H, CH<sub>2</sub>-Lev), 2.53 – 2.44 (m, 1H, CH<sub>2</sub>-Lev), 2.15 (s, 3H, CH<sub>3</sub>-Lev). <sup>13</sup>C NMR (101 MHz, CDCl<sub>3</sub>) δ 206.1, 171.7, 165.6, 137.6, 135.2, 133.7, 129.9, 129.4, 129.3, 128.8, 128.4, 128.3, 127.82, 127.80, 84.7 (C-1), 73.5, 71.9, 70.5, 68.3, 67.9, 59.4, 37.9, 29.8, 28.0. HRMS (ESI) calcd for C<sub>31</sub>H<sub>31</sub>N<sub>3</sub>O<sub>7</sub>SeNa [M+Na]<sup>+</sup> 654.1279, found 654.1281.

***N*-(Benzyl)benzyloxycarbonyl-5-amino-pentyl 2-azido-4-*O*-benzoyl-6-*O*-benzyl-3-*O*-levulinoyl-2-deoxy-*D*-galactopyranoside (**19n**)**

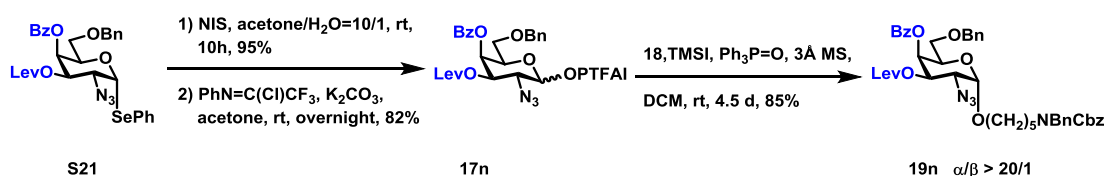

Compound **S21** (524 mg, 0.82 mmol) was dissolved in acetone/H<sub>2</sub>O (7.4 mL/0.7

---

mL), then NIS (278 mg, 1.24 mmol) was added. The resulting mixture was stirred for 10 h. The solution was diluted with EtOAc, washed with saturated Na<sub>2</sub>S<sub>2</sub>O<sub>3</sub>, water and brine, dried over anhydrous Na<sub>2</sub>SO<sub>4</sub>, filtered and concentrated *in vacuo*. The residue was purified by flash column chromatography (petroleum ether-EtOAc, 2:1) to give the intermediate (387 mg, 95%). The above intermediate (280 mg, 0.56 mmol) and 2,2,2-trifluoro-*N*-phenylacetimidoyl chloride (116 mg, 0.56 mmol) was dissolved in acetone (5.6 mL), and K<sub>2</sub>CO<sub>3</sub> (116 mg, 0.85 mmol) was added. The reaction was stirred overnight at room temperature, then filtered and concentrated *in vacuo*. The residue was purified by flash column chromatography (petroleum ether-EtOAc, 20:1 to 10:1, containing 1% Et<sub>3</sub>N) to give **17n** (309 mg, 82%) (Compound **17n** was used directly without further structural characterization). The glycosylation reaction was carried out according to General **Experimental Procedure** at rt for 4.5 d, using acceptor **18** (250 mg, 0.67 mmol) with **17n** (300 mg, 0.45 mmol), DCM 4.5 mL, Ph<sub>3</sub>P=O (748 mg, 2.69 mmol) and TMSI (64 μL, 0.45 mmol). The product was purified by silica gel column chromatography (PE-EA, 3:1) to afford **19n** (225 mg, 85%, α/β >20:1) as a colorless syrup.  $[\alpha]_D^{24} = +107.3$  (c 0.24, CHCl<sub>3</sub>). <sup>1</sup>H NMR (400 MHz, CDCl<sub>3</sub>) δ 7.95 (d, *J* = 7.7 Hz, 2H, Ar), 7.54 (t, *J* = 7.4 Hz, 1H, Ar), 7.39 (t, *J* = 7.6 Hz, 2H, Ar), 7.33 – 7.06 (m, 15H, Ar), 5.67 (d, *J* = 3.2 Hz, 1H, H-4), 5.39 (dd, *J* = 11.2, 3.2 Hz, 1H, H-3), 5.11 (d, *J* = 12.0 Hz, 2H, CH<sub>2</sub>-Cbz), 4.95 (s, 1H, H-1), 4.46 – 4.38 (m, 3H, CH<sub>2</sub>-Bn), 4.29 (d, *J* = 11.9 Hz, 1H, CH<sub>2</sub>-Bn), 4.24 – 4.15 (m, 1H, H-5), 3.69 – 3.57 (m, 2H, H-2, CH<sub>2</sub>), 3.49 – 3.30 (m, 3H, H-6, CH<sub>2</sub>), 3.25 – 3.06 (m, 2H, CH<sub>2</sub>), 2.77 – 2.66 (m, 1H, CH<sub>2</sub>-Lev), 2.65 – 2.57 (m, 1H, CH<sub>2</sub>-Lev), 2.56 – 2.45 (m, 1H, CH<sub>2</sub>-Lev), 2.44 – 2.34 (m, 1H, CH<sub>2</sub>-Lev), 2.05 (s, 3H, CH<sub>3</sub>-Lev), 1.61 – 1.41 (m, 4H, CH<sub>2</sub>), 1.32 – 1.21 (m, 2H, CH<sub>2</sub>). <sup>13</sup>C NMR (101 MHz, CDCl<sub>3</sub>) δ 206.0, 171.7, 165.6, 156.7, 156.2, 138.0, 137.5, 136.9, 133.5, 129.9, 129.8, 129.4, 128.7, 128.62, 128.56, 128.5, 128.3, 127.94, 127.88, 127.8, 127.7, 127.6, 127.3, 98.3 (C-1), 77.4, 73.5, 68.84, 68.76, 68.6, 68.1, 67.2, 57.9, 53.5, 50.6, 50.4, 47.1, 46.2, 37.9, 29.7, 29.1, 28.0, 23.4. HRMS (ESI) calcd for C<sub>45</sub>H<sub>54</sub>N<sub>5</sub>O<sub>10</sub> [M+NH<sub>4</sub>]<sup>+</sup> 824.3865, found 824.3872.

**Phenyl 3-*O*-acetyl-2-azido-4-*O*-benzoyl-6-*O*-benzyl-2-deoxy-1-seleno- $\alpha$ -D-galactopyranoside (S24)**

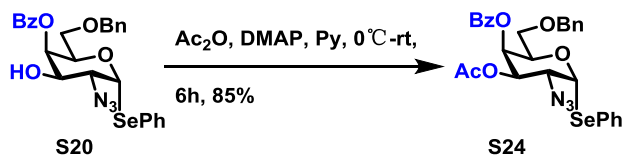

Compound **S20** (404mg, 0.82 mmol) was dissolved in anhydrous pyridine (3 mL). The solution was cooled to 0 °C, DMAP (100 mg, 0.82 mmol) was added, then Ac<sub>2</sub>O (0.11 mL, 1.22 mmol) was added slowly. The resulting mixture was stirred overnight at room temperature. Upon completion, the reaction mixture was diluted in EA, washed with 3M HCl, saturated NaHCO<sub>3</sub> solution and brine. The combined organic layer was concentrated under vacuum. The residue was purified by column chromatography on silica gel (PE-EA = 8:1) to afford **S24** (403 mg, 85%) as a white solid.  $[\alpha]_D^{24} = +199.8$  (c 0.20, CHCl<sub>3</sub>). <sup>1</sup>H NMR (400 MHz, CDCl<sub>3</sub>)  $\delta$  8.04 (d, *J* = 7.5 Hz, 2H, Ar), 7.66 – 7.58 (m, 3H, Ar), 7.46 (t, *J* = 7.6 Hz, 2H, Ar), 7.30 – 7.15 (m, 8H, Ar), 6.05 (d, *J* = 5.4 Hz, 1H, H-1), 5.80 (d, *J* = 3.2 Hz, 1H, H-4), 5.22 (dd, *J* = 10.9, 3.2 Hz, 1H, H-3), 4.80 (t, *J* = 6.3 Hz, 1H, H-5), 4.42 (d, *J* = 11.9 Hz, 1H, CH<sub>2</sub>-Bn), 4.38 – 4.30 (m, 2H, H-2, CH<sub>2</sub>-Bn), 3.59 – 3.45 (m, 2H, H-6), 2.03 (s, 3H, CH<sub>3</sub>-Ac). <sup>13</sup>C NMR (101 MHz, CDCl<sub>3</sub>)  $\delta$  169.8, 165.5, 137.6, 135.2, 133.6, 129.9, 129.4, 129.2, 128.7, 128.4, 128.3, 127.80, 127.78, 84.7 (C-1), 73.5, 71.7, 70.5, 68.3, 67.9, 59.3, 20.8. HRMS (ESI) calcd for C<sub>28</sub>H<sub>27</sub>N<sub>3</sub>O<sub>6</sub>SeNa [M+Na]<sup>+</sup> 598.1017, found 598.1015.

***N*-(Benzyl)benzyloxycarbonyl-5-amino-pentyl 3-*O*-acetyl-2-azido-4-*O*-benzoyl-6-*O*-benzyl-2-deoxy-D-galactopyranoside (19o)**

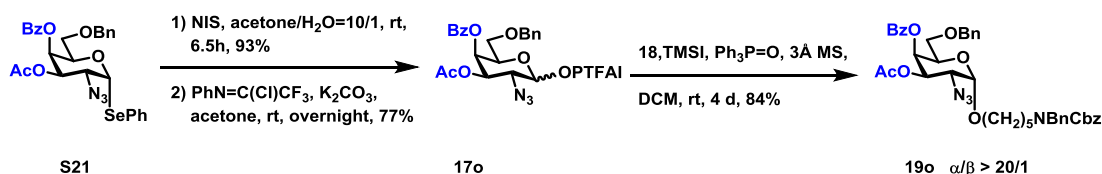

Compound **S24** (409 mg, 0.71 mmol) was dissolved in acetone/H<sub>2</sub>O (6.4 mL/0.6 mL), then NIS (238 mg, 1.06 mmol) was added. The resulting mixture was stirred for 6.5 h. The solution was diluted with EtOAc, washed with saturated Na<sub>2</sub>S<sub>2</sub>O<sub>3</sub>, water

---

and brine, dried over anhydrous Na<sub>2</sub>SO<sub>4</sub>, filtered and concentrated *in vacuo*. The residue was purified by flash column chromatography (petroleum ether-EtOAc, 4:1) to give the intermediate (287 mg, 93%). The above intermediate (287 mg, 0.65 mmol) and 2,2,2-trifluoro-*N*-phenylacetimidoyl chloride (134 mg, 0.65 mmol) was dissolved in acetone (6.5 mL), and K<sub>2</sub>CO<sub>3</sub> (134 mg, 0.98 mmol) was added. The reaction was stirred overnight at room temperature, then filtered and concentrated *in vacuo*. The residue was purified by flash column chromatography (petroleum ether, containing 2% Et<sub>3</sub>N) to give **17o** (306 mg, 77%) (Compound **17o** was used directly without further structural characterization). The glycosylation reaction was carried out according to **General Experimental Procedure** at rt for 4 d, using acceptor **18** *N*-(benzyl)benzyloxycarbonyl-5-aminopentanol (279 mg, 0.75 mmol) with **17o** (306 mg, 0.5 mmol), DCM (5 mL), Ph<sub>3</sub>P=O (834 mg, 3.0 mmol) and TMSI (70 μL, 0.5 mmol). The product was purified by silica gel column chromatography (PE-EA, 4:1) and LH-20 (MeOH/DCM =1:1) to afford **19o** (309 mg, 84%, α/β > 20:1) as a colorless syrup.  $[\alpha]_D^{24} = +92.9$  (c 0.61, CHCl<sub>3</sub>). <sup>1</sup>H NMR (400 MHz, CDCl<sub>3</sub>) δ 8.04 (d, *J* = 7.8 Hz, 2H, Ar), 7.59 (t, *J* = 7.5 Hz, 1H, Ar), 7.45 (t, *J* = 7.6 Hz, 2H, Ar), 7.40 – 7.13 (m, 15H, Ar), 5.80 – 5.73 (m, 1H, H-4), 5.52 – 5.43 (m, 1H, H-3), 5.18 (d, *J* = 11.8 Hz, 2H, CH<sub>2</sub>-Cbz), 5.03 (s, 1H, H-1), 4.54 – 4.44 (m, 3H, CH<sub>2</sub>-Bn), 4.36 (d, *J* = 12.0 Hz, 1H, CH<sub>2</sub>-Bn), 4.32 – 4.23 (m, 1H, H-5), 3.77 – 3.65 (m, 2H, H-2, CH<sub>2</sub>), 3.59 – 3.39 (m, 3H, H-6, CH<sub>2</sub>), 3.33 – 3.17 (m, 2H, CH<sub>2</sub>), 2.00 (s, 3H, CH<sub>3</sub>-Ac), 1.71 – 1.45 (m, 4H, CH<sub>2</sub>), 1.41 – 1.27 (m, 2H, CH<sub>2</sub>). <sup>13</sup>C NMR (101 MHz, CDCl<sub>3</sub>) δ 170.0, 165.6, 156.8, 156.3, 138.0, 137.6, 133.5, 129.9, 129.6, 128.64, 128.62, 128.54, 128.51, 128.43, 128.40, 128.0, 127.95, 127.93, 127.87, 127.82, 127.75, 127.69, 127.4, 98.3 (C-1), 73.6, 68.8, 68.7, 68.20, 68.15, 67.3, 57.9, 50.7, 50.4, 47.2, 46.3, 29.1, 28.0, 27.6, 23.4, 20.8. HRMS (ESI) calcd for C<sub>42</sub>H<sub>47</sub>N<sub>4</sub>O<sub>9</sub> [M+H]<sup>+</sup> 751.3338, found 751.3334.

**Phenyl 2-azido-6-*O*-benzyl-2-deoxy-3,4-di-*O*-levulinoyl-1-seleno- $\alpha$ -D-galactopyranoside (S27)**



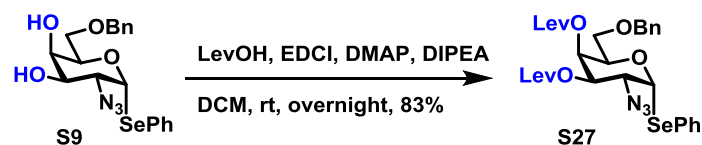

Compound **S9** (400 mg, 0.92 mmol) and levulinic acid (320 mg, 2.76 mmol) in anhydrous DCM (3 mL) was added DMAP (224 mg, 1.88 mmol), EDCI (634 mg, 3.31 mmol) and DIPEA (0.91 mL, 5.51 mmol). The resulting mixture was stirred overnight at room temperature. Upon completion, the solvent was evaporated under vacuum. The residue was purified by column chromatography on silica gel (petroleum ether-EtOAc, 4:1) to afford **S27** (480 mg, 83%) as a syrup.  $[\alpha]_D^{24} = +186.3$  (c 0.22,  $\text{CHCl}_3$ ).  $^1\text{H NMR}$  (400 MHz,  $\text{CDCl}_3$ )  $\delta$  7.62 – 7.54 (m, 2H, Ar), 7.36 – 7.22 (m, 6H, Ar), 7.18 (t,  $J = 7.5$  Hz, 2H, Ar), 5.97 (d,  $J = 5.4$  Hz, 1H, H-1), 5.54 (d,  $J = 3.3$  Hz, 1H, H-4), 5.08 (dd,  $J = 10.9, 3.2$  Hz, 1H, H-3), 4.65 (t,  $J = 6.3$  Hz, 1H, H-5), 4.48 – 4.37 (m, 2H,  $\text{CH}_2\text{-Bn}$ ), 4.25 (dd,  $J = 10.8, 5.4$  Hz, 1H, H-2), 3.51 – 3.39 (m, 2H, H-6), 2.87 – 2.68 (m, 4H,  $\text{CH}_2\text{-Lev}$ ), 2.67 – 2.57 (m, 2H,  $\text{CH}_2\text{-Lev}$ ), 2.56 – 2.46 (m, 2H,  $\text{CH}_2\text{-Lev}$ ), 2.19 (s, 3H,  $\text{CH}_3\text{-Lev}$ ), 2.17 (s, 3H,  $\text{CH}_3\text{-Lev}$ ).  $^{13}\text{C NMR}$  (101 MHz,  $\text{CDCl}_3$ )  $\delta$  206.2, 206.0, 171.9, 171.7, 137.8, 135.1, 129.2, 128.5, 128.2, 128.0, 127.9, 127.8, 84.7 (C-1), 73.5, 71.7, 70.3, 67.9, 59.2, 37.9, 37.8, 29.9, 29.8, 27.9, 27.8. HRMS (ESI) calcd for  $\text{C}_{29}\text{H}_{33}\text{N}_3\text{O}_8\text{SeNa}$   $[\text{M}+\text{Na}]^+$  648.1385, found 648.1386.

***N*-(Benzyl)benzyloxycarbonyl-5-aminopentyl 2-azido-6-*O*-benzyl-2-deoxy-3,4-di-*O*-levulinoyl-*D*-galactopyranoside (19p)**

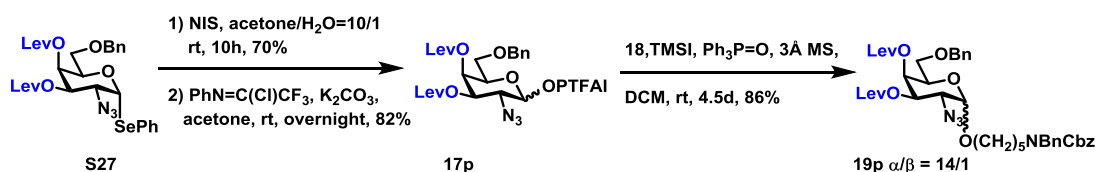

Compound **S27** (400 mg, 0.63 mmol) was dissolved in acetone/ $\text{H}_2\text{O}$  (5.7 mL/0.6 mL), then NIS (214 mg, 0.95 mmol) was added. The resulting mixture was stirred for 10 h. The solution was diluted with EtOAc, washed with saturated  $\text{Na}_2\text{S}_2\text{O}_3$ , water and brine, dried over anhydrous  $\text{Na}_2\text{SO}_4$ , filtered and concentrated *in vacuo*. The residue was purified by flash column chromatography (petroleum ether-EtOAc, 1:1)

---

to give the intermediate (217 mg, 70%). The above intermediate (217 mg, 0.44 mmol) and 2,2,2-trifluoro-*N*-phenylacetimidoyl chloride (137 mg, 0.66 mmol) was dissolved in acetone (4.4 mL), and K<sub>2</sub>CO<sub>3</sub> (91 mg, 0.66 mmol) was added. The reaction was stirred overnight at room temperature, then filtered and concentrated *in vacuo*. The residue was purified by flash column chromatography (petroleum ether-EtOAc, 10:1 to 3:1, containing 1% Et<sub>3</sub>N) to give **17p** (240 mg, 82%) (Compound **17p** was used directly without further structural characterization). The glycosylation reaction was carried out according to **General Experimental Procedure** at rt for 4.5 d, using acceptor **18** (202 mg, 0.54 mmol) with **17p** (240 mg, 0.36 mmol), DCM 3.6 mL, Ph<sub>3</sub>P=O (606 mg, 2.18 mmol) and TMSI (51 μL, 0.36 mmol). The product was purified by silica gel column chromatography (PE-EA, 2:1) to afford **19p** (250 mg, 86%, α/β =14:1) as a colorless syrup.  $[\alpha]_D^{24} = + 74.8$  (c 0.17, CHCl<sub>3</sub>). α isomer: <sup>1</sup>H NMR (400 MHz, CDCl<sub>3</sub>) δ 7.48 – 6.96 (m, 15H, Ar), 5.50 (d, *J* = 3.3 Hz, 1H, H-4), 5.33 (dd, *J* = 11.0, 3.2 Hz, 1H, H-3), 5.17 (d, *J* = 10.5 Hz, 2H, CH<sub>2</sub>-Cbz), 4.94 (s, 1H, H-1), 4.54 – 4.40 (m, 4H, CH<sub>2</sub>-Bn), 4.19 – 4.07 (m, 1H, H-5), 3.73 – 3.55 (m, 2H, H-2, CH<sub>2</sub>), 3.53 – 3.33 (m, 3H, H-6, CH<sub>2</sub>), 3.30 – 3.15 (m, 2H, CH<sub>2</sub>), 2.84 – 2.67 (m, 4H, CH<sub>2</sub>-Lev), 2.66 – 2.56 (m, 2H, CH<sub>2</sub>-Lev), 2.56 – 2.45 (m, 2H, CH<sub>2</sub>-Lev), 2.17 (s, 3H, CH<sub>3</sub>-Lev), 2.16 (s, 3H, CH<sub>3</sub>-Lev), 1.66 – 1.46 (m, 4H, CH<sub>2</sub>), 1.39 – 1.21 (m, 2H, CH<sub>2</sub>). <sup>13</sup>C NMR (101 MHz, CDCl<sub>3</sub>) δ 206.2, 206.1, 171.9, 171.8, 156.7, 156.2, 138.0, 137.8, 136.9, 128.6, 128.5, 128.44, 128.40, 128.0, 127.9, 127.84, 127.77, 127.3, 98.1 (C-1), 73.5, 68.7, 68.5, 68.3, 68.0, 67.8, 67.2, 57.7, 50.6, 50.3, 47.1, 46.2, 37.88, 37.85, 37.8, 29.85, 29.77, 29.1, 27.9, 27.7, 23.4. HRMS (ESI) calcd for C<sub>43</sub>H<sub>56</sub>N<sub>5</sub>O<sub>11</sub> [M+NH<sub>4</sub>]<sup>+</sup> 818.3971, found 818.3979.

## Reaction Scope of acceptors

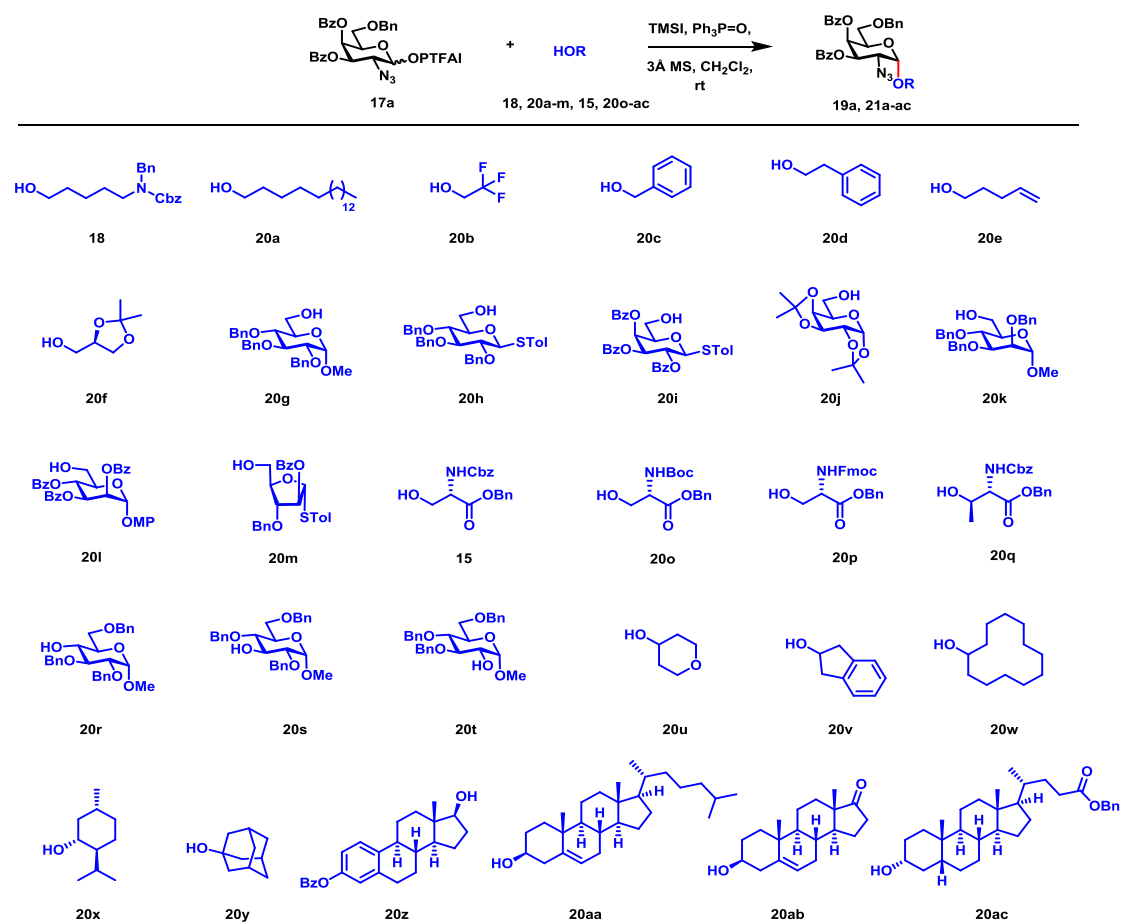

**Figure S1.** The acceptors **18**, **20a-m**, **15**, **20o-ac** using in the stereoselective glycosylation

### Octadecyl 2-azido-3,4-di-*O*-benzoyl-6-*O*-benzyl-2-deoxy- $\alpha$ -D-galactopyranoside (**21a**)

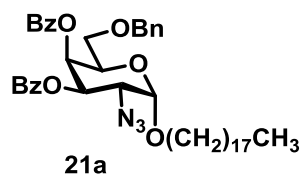

The glycosylation reaction was carried out according to **General Experimental Procedure** at 25°C for 24 h, using acceptor 1-octadecanol **20a** (92.5 mg, 0.34 mmol) with **17a** (153.8 mg, 0.23 mmol), DCM 2.3 mL, Ph<sub>3</sub>P=O (380.7 mg, 1.37 mmol) and TMSI (33 μL, 0.23 mmol). The product was purified by silica gel column chromatography (PE-EA, 25:1 to 20:1 to 10:1) to afford **21a** (152.6 mg, 92%,

$\alpha/\beta > 20:1$ ) as a colorless syrup.  $[\alpha]_D^{23} = +149.3$  (c 0.16,  $\text{CHCl}_3$ ).  $^1\text{H NMR}$  (400 MHz,  $\text{CDCl}_3$ )  $\delta$  7.98 (d,  $J = 7.6$  Hz, 2H, Ar), 7.88 (d,  $J = 7.6$  Hz, 2H, Ar), 7.57 (t,  $J = 7.4$  Hz, 1H, Ar), 7.51 – 7.39 (m, 3H, Ar), 7.30 (t,  $J = 7.7$  Hz, 2H, Ar), 7.25 – 7.13 (m, 5H, Ar), 5.94 (d,  $J = 3.3$  Hz, 1H, H-4), 5.77 (dd,  $J = 11.1, 3.3$  Hz, 1H, H-3), 5.14 (d,  $J = 3.4$  Hz, 1H, H-1), 4.52 (d,  $J = 11.9$  Hz, 1H,  $\text{CH}_2\text{-Bn}$ ), 4.44 – 4.37 (m, 2H,  $\text{CH}_2\text{-Bn}$ , H-5), 3.87 – 3.77 (m, 2H, H-2,  $\text{CH}_2\text{-Octadecyl}$ ), 3.64 – 3.51 (m, 3H,  $\text{CH}_2\text{-Octadecyl}$ , H-6), 1.74 – 1.65 (m, 2H,  $\text{CH}_2\text{-Octadecyl}$ ), 1.41 (q,  $J = 7.3$  Hz, 2H,  $\text{CH}_2\text{-Octadecyl}$ ), 1.30 – 1.25 (m, 28H), 0.88 (t,  $J = 6.7$  Hz, 3H,  $\text{CH}_3\text{-Octadecyl}$ ).  $^{13}\text{C NMR}$  (101 MHz,  $\text{CDCl}_3$ )  $\delta$  165.4, 137.7, 133.4, 133.2, 129.9, 129.8, 129.6, 129.4, 128.6, 128.42, 128.37, 128.3, 127.71, 127.67, 98.5 (C-1), 73.6, 69.2, 69.1, 69.0, 68.32, 68.28, 58.4, 32.0, 29.80, 29.78, 29.75, 29.73, 29.67, 29.53, 29.50, 29.4, 26.3, 22.8, 14.2. HRMS (ESI) calcd for  $\text{C}_{45}\text{H}_{65}\text{N}_4\text{O}_7$   $[\text{M}+\text{NH}_4]^+$  773.4848, found 773.4857.

**2,2,2-Trifluoroethyl 2-azido-3,4-di-O-benzoyl-6-O-benzyl-2-deoxy- $\alpha$ -D-galactopyranoside (21b)**

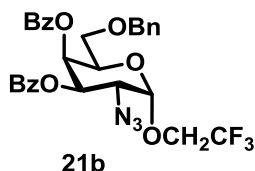

The glycosylation reaction was carried out according to **General Experimental Procedure** at 25 °C for 2.5 d, using acceptor 2,2,2-trifluoroethanol **20b** (35.0 mg, 0.35 mmol) with **17a** (157.7 mg, 0.23 mmol), DCM 2.3 mL,  $\text{Ph}_3\text{P}=\text{O}$  (390.3 mg, 1.40 mmol) and TMSI (33  $\mu\text{L}$ , 0.23 mmol). The product was purified by silica gel column chromatography (PE-EA, 10:1) to afford **21b** (117 mg, 86%,  $\alpha/\beta > 20:1$ ) as a colorless syrup.  $[\alpha]_D^{21} = +204.5$  (c 0.21,  $\text{CHCl}_3$ ).  $^1\text{H NMR}$  (400 MHz,  $\text{CDCl}_3$ )  $\delta$  7.88 (d,  $J = 7.8$  Hz, 2H, Ar), 7.79 (d,  $J = 7.7$  Hz, 2H, Ar), 7.51 (t,  $J = 7.4$  Hz, 1H, Ar), 7.44 – 7.32 (m, 3H, Ar), 7.23 (t,  $J = 7.7$  Hz, 2H, Ar), 7.17 – 7.07 (m, 5H, Ar), 5.87 (d,  $J = 3.2$  Hz, 1H, H-4), 5.66 (dd,  $J = 11.1, 3.3$  Hz, 1H, H-3), 5.16 (d,  $J = 3.5$  Hz, 1H, H-1), 4.42 (d,  $J = 11.9$  Hz, 1H,  $\text{CH}_2\text{-Bn}$ ), 4.35 – 4.28 (m, 2H,  $\text{CH}_2\text{-Bn}$ , H-5), 4.06 – 3.91 (m, 2H,  $\text{CH}_2\text{-Trifluoroethyl}$ ), 3.87 (dd,  $J = 11.1, 3.6$  Hz, 1H, H-2), 3.56 – 3.46 (m, 2H, H-6).

$^{13}\text{C}$  NMR (101 MHz,  $\text{CDCl}_3$ )  $\delta$  165.4, 165.3, 137.5, 133.6, 133.4, 130.0, 129.90, 129.85, 129.4, 129.2, 128.7, 128.5, 128.4, 127.8, 127.7, 124.9, 122.2, 99.1 (C-1), 73.6, 69.2, 68.8, 68.6, 68.0, 65.7, 65.3, 65.0, 64.6, 58.0. HRMS (ESI) calcd for  $\text{C}_{29}\text{H}_{30}\text{N}_4\text{O}_7\text{F}_3$   $[\text{M}+\text{NH}_4]^+$  603.2061, found 603.2071.

**Benzyl 2-azido-3,4-di-O-benzoyl-6-O-benzyl-2-deoxy- $\alpha$ -D-galactopyranoside(21c)**

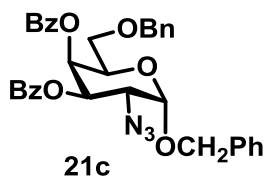

The glycosylation reaction was carried out according to **General Experimental Procedure** at 25 °C for 23 h, using acceptor benzyl alcohol **20c** (39.2 mg, 0.36 mmol) with **17a** (163.2 mg, 0.24 mmol), DCM 2.4 mL,  $\text{Ph}_3\text{P}=\text{O}$  (403.9 mg, 1.45 mmol) and TMSI (35  $\mu\text{L}$ , 0.24 mmol). The product was purified by silica gel column chromatography (PE-EA, 20:1 to 5:1) to afford **21c** (135.6 mg, 94%,  $\alpha/\beta >20:1$ ) as a colorless syrup.  $[\alpha]_{\text{D}}^{23} = +211.3$  (c 0.14,  $\text{CHCl}_3$ ).  $^1\text{H}$  NMR (400 MHz,  $\text{CDCl}_3$ )  $\delta$  7.98 (d,  $J = 7.7$  Hz, 2H, Ar), 7.89 (d,  $J = 7.7$  Hz, 2H, Ar), 7.58 (t,  $J = 7.4$  Hz, 1H, Ar), 7.50 – 7.40 (m, 5H, Ar), 7.40 – 7.28 (m, 6H, Ar), 7.26 – 7.16 (m, 4H, Ar), 5.94 (d,  $J = 3.3$  Hz, 1H, H-4), 5.81 (dd,  $J = 11.0, 3.3$  Hz, 1H, H-3), 5.24 (d,  $J = 3.5$  Hz, 1H, H-1), 4.84 (d,  $J = 11.9$  Hz, 1H,  $\text{CH}_2\text{-Bn}$ ), 4.69 (d,  $J = 11.9$  Hz, 1H,  $\text{CH}_2\text{-Bn}$ ), 4.52 (d,  $J = 12.0$  Hz, 1H,  $\text{CH}_2\text{-Bn}$ ), 4.47 – 4.35 (m, 2H,  $\text{CH}_2\text{-Bn}$ , H-5), 3.92 (dd,  $J = 11.0, 3.5$  Hz, 1H, H-2), 3.59 (d,  $J = 6.4$  Hz, 2H, H-6).  $^{13}\text{C}$  NMR (101 MHz,  $\text{CDCl}_3$ )  $\delta$  165.4, 137.7, 136.5, 133.4, 133.3, 129.85, 129.82, 129.5, 129.3, 128.64, 128.60, 128.5, 128.4, 128.35, 128.26, 128.20, 127.72, 127.68, 97.2 (C-1), 73.6, 70.0, 69.3, 69.0, 68.5, 68.3, 58.4. HRMS (ESI) calcd for  $\text{C}_{34}\text{H}_{35}\text{N}_4\text{O}_7$   $[\text{M}+\text{NH}_4]^+$  611.2500, found 611.2501.

**Phenethyl 2-azido-3,4-di-O-benzoyl-6-O-benzyl-2-deoxy- $\alpha$ -D-galactopyranoside (21d)**

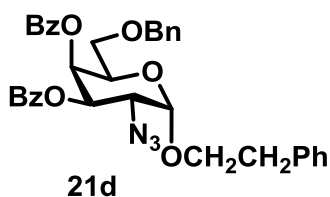

The glycosylation reaction was carried out according to **General Experimental Procedure** at 25 °C for 23 h, using acceptor phenethyl alcohol **20d** (42.2 mg, 0.35 mmol) with **17a** (155.4 mg, 0.23 mmol), DCM 2.3 mL, Ph<sub>3</sub>P=O (384.5 mg, 1.38 mmol) and TMSI (33 μL, 0.23 mmol). The product was purified by silica gel column chromatography (PE-EA, 20:1 to 5:1) to afford **21d** (129.1 mg, 92%, α/β >20:1) as a colorless syrup.  $[\alpha]_D^{23} = +222.4$  (c 0.27, CHCl<sub>3</sub>). <sup>1</sup>H NMR (400 MHz, CDCl<sub>3</sub>) δ 7.98 (d, *J* = 7.7 Hz, 2H, Ar), 7.90 (d, *J* = 7.7 Hz, 2H, Ar), 7.59 (t, *J* = 7.4 Hz, 1H, Ar), 7.50 (t, *J* = 7.4 Hz, 1H, Ar), 7.44 (t, *J* = 7.7 Hz, 2H, Ar), 7.37 – 7.15 (m, 12H, Ar), 5.83 (d, *J* = 3.2 Hz, 1H, H-4), 5.74 (dd, *J* = 11.0, 3.3 Hz, 1H, H-3), 5.18 (d, *J* = 3.4 Hz, 1H, H-1), 4.47 (d, *J* = 12.0 Hz, 1H, CH<sub>2</sub>-Bn), 4.35 (d, *J* = 11.9 Hz, 1H, CH<sub>2</sub>-Bn), 4.07 – 3.95 (m, 2H), 3.90 – 3.78 (m, 2H, H-2), 3.55 – 3.45 (m, 2H), 3.08 – 2.98 (m, 2H). <sup>13</sup>C NMR (101 MHz, CDCl<sub>3</sub>) δ 165.40, 165.38, 138.4, 137.7, 133.4, 133.3, 129.84, 129.81, 129.5, 129.3, 129.1, 128.59, 128.57, 128.4, 127.7, 127.62, 126.60, 98.1 (C-1), 73.4, 69.2, 69.1, 69.0, 68.3, 68.2, 58.4, 36.1. HRMS (ESI) calcd for C<sub>35</sub>H<sub>37</sub>N<sub>4</sub>O<sub>7</sub> [M+NH<sub>4</sub>]<sup>+</sup> 625.2657, found 625.2660.

**Pent-4-en-yl 2-azido-3,4-di-O-benzoyl-6-O-benzyl-2-deoxy-α-D-galactopyranoside (21e)**

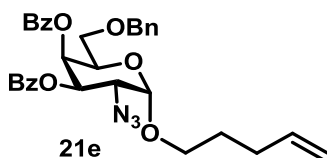

The glycosylation reaction was carried out according to **General Experimental Procedure** at 25 °C for 23 h, using acceptor 4-penten-1-ol **20e** (30.0 mg, 0.35 mmol) with **17a** (156.5 mg, 0.23 mmol), DCM 2.3 mL, Ph<sub>3</sub>P=O (387.4 mg, 1.39 mmol) and TMSI (33 μL, 0.23 mmol). The product was purified by silica gel column chromatography (PE-EA, 20:1 to 10:1) to afford **21e** (121.4 mg, 91%, α/β >20:1) as a

colorless syrup.  $[\alpha]_{\text{D}}^{21} = +227.4$  (c 0.13,  $\text{CHCl}_3$ ).  $^1\text{H NMR}$  (400 MHz,  $\text{CDCl}_3$ )  $\delta$  7.98 (d,  $J = 7.7$  Hz, 2H, Ar), 7.88 (d,  $J = 7.7$  Hz, 2H, Ar), 7.60 (t,  $J = 7.4$  Hz, 1H, Ar), 7.47 (m, 7.5 Hz, 3H, Ar), 7.32 (t,  $J = 7.7$  Hz, 2H, Ar), 7.22 (t,  $J = 7.4$  Hz, 5H, Ar), 5.93 (d,  $J = 3.3$  Hz, 1H, H-4), 5.89 – 5.80 (m, 1H,  $\text{CH}=\text{Pent}$ ), 5.77 (dd,  $J = 11.1, 3.3$  Hz, 1H, H-3), 5.15 (d,  $J = 3.4$  Hz, 1H, H-1), 5.08 (d,  $J = 17.2$  Hz, 1H,  $\text{CH}_2=\text{Pent}$ ), 5.01 (d,  $J = 10.2$  Hz, 1H,  $\text{CH}_2=\text{Pent}$ ), 4.53 (d,  $J = 11.9$  Hz, 1H,  $\text{CH}_2\text{-Bn}$ ), 4.44 – 4.37 (m, 2H,  $\text{CH}_2\text{-Bn}$ , H-5), 3.90 – 3.77 (m, 2H, H-2,  $\text{CH}_2\text{-Pent}$ ), 3.65 – 3.53 (m, 3H, H-6,  $\text{CH}_2\text{-Pent}$ ), 2.21 (q,  $J = 7.2$  Hz, 2H,  $\text{CH}_2\text{-Pent}$ ), 1.84 – 1.75 (m, 2H,  $\text{CH}_2\text{-Pent}$ ).  $^{13}\text{C NMR}$  (101 MHz,  $\text{CDCl}_3$ )  $\delta$  165.5, 165.4, 137.9, 137.7, 133.5, 133.3, 129.90, 129.87, 129.6, 129.4, 128.6, 128.42, 128.39, 127.8, 127.7, 115.3, 98.5 (C-1), 73.6, 69.13, 69.05, 68.4, 68.3, 68.2, 58.4, 30.4, 28.7. HRMS (ESI) calcd for  $\text{C}_{32}\text{H}_{37}\text{N}_4\text{O}_7$   $[\text{M}+\text{NH}_4]^+$  589.2657, found 589.2663.

**(S)-(+)-2,2-dimethyl-1,3-dioxolane-4-methyl 2-azido-3,4-di-O-benzoyl-6-O-benzyl-2-deoxy- $\alpha$ -D-galactopyranoside (21f)**

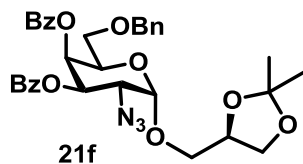

The glycosylation reaction was carried out according to **General Experimental Procedure** at 25°C for 25 h, using acceptor (S)-(+)-2,2-dimethyl-1,3-dioxolane-4-methanol **20f** (44.7 mg, 0.34 mmol) with **17a** (152 mg, 0.23 mmol), DCM 2.3 mL,  $\text{Ph}_3\text{P}=\text{O}$  (376.2 mg, 1.35 mmol) and TMSI (32  $\mu\text{L}$ , 0.23 mmol). The product was purified by silica gel column chromatography (PE-EA, 10:1 to 5:1) to afford **21f** (129.8 mg, 93%,  $\alpha/\beta >20:1$ ) as a white solid.  $[\alpha]_{\text{D}}^{23} = +195.6$  (c 0.18,  $\text{CHCl}_3$ ).  $^1\text{H NMR}$  (400 MHz,  $\text{CDCl}_3$ )  $\delta$  8.01 – 7.95 (m, 2H, Ar), 7.91 – 7.84 (m, 2H, Ar), 7.59 (t,  $J = 7.4$  Hz, 1H, Ar), 7.53 – 7.41 (m, 3H, Ar), 7.32 (t,  $J = 7.7$  Hz, 2H, Ar), 7.26 – 7.14 (m, 5H, Ar), 5.94 (d,  $J = 3.2$  Hz, 1H, H-4), 5.75 (dd,  $J = 11.0, 3.4$  Hz, 1H, H-3), 5.24 (d,  $J = 3.5$  Hz, 1H, H-1), 4.52 (d,  $J = 11.9$  Hz, 1H,  $\text{CH}_2\text{-Bn}$ ), 4.48 – 4.34 (m, 3H, H-5,  $\text{CH}_2\text{-Bn}$ , CH), 4.12 (dd,  $J = 8.4, 6.3$  Hz, 1H,  $\text{CH}_2$ ), 3.90 (dd,  $J = 11.0, 3.5$  Hz, 1H,

H-2), 3.86 – 3.79 (m, 2H, CH<sub>2</sub>), 3.72 (dd, *J* = 10.6, 5.3 Hz, 1H, CH<sub>2</sub>), 3.65 – 3.54 (m, 2H, H-6), 1.47 (s, 3H, CH<sub>3</sub>), 1.38 (s, 3H, CH<sub>3</sub>). <sup>13</sup>C NMR (101 MHz, CDCl<sub>3</sub>) δ 165.40, 165.38, 137.6, 133.5, 133.3, 129.9, 129.8, 129.5, 129.3, 128.6, 128.39, 128.37, 127.73, 127.71, 109.7, 98.7 (C-1), 74.4, 73.6, 69.14, 69.05, 68.9, 68.5, 68.2, 66.8, 58.4, 26.9, 25.5. HRMS (ESI) calcd for C<sub>33</sub>H<sub>39</sub>N<sub>4</sub>O<sub>9</sub> [M+NH<sub>4</sub>]<sup>+</sup> 635.2712, found 635.2716.

**Methyl *O*-(2-azido-3,4-di-*O*-benzoyl-6-*O*-benzyl-2-deoxy- $\alpha$ -D-galactopyranosyl)-(1 $\rightarrow$ 6)-2,3,4-tri-*O*-benzyl- $\alpha$ -D-glucopyranoside (**21g**)**

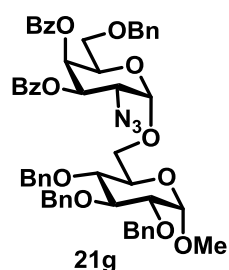

The glycosylation reaction was carried out according to **General Experimental Procedure** at 25 °C for 36 h, using acceptor **20g**<sup>5</sup> (88.8 mg, 0.19 mmol) with **17a** (193.4 mg, 0.29 mmol), DCM 1.9 mL, Ph<sub>3</sub>P=O (478.6 mg, 1.72 mmol) and TMSI (41  $\mu$ L, 0.29 mmol). The product was purified by silica gel column chromatography (PE-EA, 4:1) to afford **21g** (184 mg, 99%,  $\alpha/\beta >20:1$ ) as a white solid.  $[\alpha]_D^{23} = +149.1$  (c 0.15, CHCl<sub>3</sub>). <sup>1</sup>H NMR (400 MHz, CDCl<sub>3</sub>) δ 7.94 (d, *J* = 7.7 Hz, 2H, Ar), 7.86 (d, *J* = 7.7 Hz, 2H, Ar), 7.53 (t, *J* = 7.5 Hz, 1H, Ar), 7.46 – 7.22 (m, 20H, Ar), 7.22 – 7.13 (m, 5H, Ar), 5.87 (s, 1H, H-4<sub>GalN</sub>), 5.68 (d, *J* = 11.0 Hz, 1H, H-3<sub>GalN</sub>), 5.22 (s, 1H, H-1<sub>GalN</sub>), 4.97 (dd, *J* = 15.9, 11.2 Hz, 2H, CH<sub>2</sub>-Bn), 4.85 – 4.72 (m, 2H, CH<sub>2</sub>-Bn), 4.69 – 4.57 (m, 3H, CH<sub>2</sub>-Bn, H-1<sub>Glc</sub>), 4.43 (d, *J* = 12.0 Hz, 1H, CH<sub>2</sub>-Bn), 4.32 (d, *J* = 11.7 Hz, 2H, CH<sub>2</sub>-Bn, H-5<sub>GalN</sub>), 4.02 (t, *J* = 9.4 Hz, 1H), 3.91 – 3.73 (m, 4H, H-2<sub>GalN</sub>), 3.62 – 3.46 (m, 4H, H-2<sub>Glc</sub>, H-6<sub>GalN</sub>), 3.39 (s, 3H, CH<sub>3</sub>-OMe). <sup>13</sup>C NMR (101 MHz, CDCl<sub>3</sub>) δ 165.3, 138.8, 138.3, 138.2, 137.6, 133.4, 133.2, 129.8, 129.7, 129.5, 129.3, 128.53, 128.46, 128.4, 128.35, 128.29, 128.1, 127.91, 127.87, 127.8, 127.6, 127.5, 98.5 (C-1<sub>GalN</sub>), 98.1 (C-1<sub>Glc</sub>), 82.1, 80.1, 77.8, 75.7, 75.1, 73.42, 73.37, 70.1, 68.9, 68.1, 66.7, 58.5, 55.2. HRMS (ESI) calcd for C<sub>55</sub>H<sub>59</sub>N<sub>4</sub>O<sub>12</sub> [M+NH<sub>4</sub>]<sup>+</sup> 967.4124, found 967.4134.



***p*-Methylphenyl *O*-(2-azido-3,4-di-*O*-benzoyl-6-*O*-benzyl-2-deoxy- $\alpha$ -D-galactopyranosyl)-(1 $\rightarrow$ 6)-2,3,4-tri-*O*-benzyl-1-thio- $\beta$ -D-glucopyranoside (**21h**)**

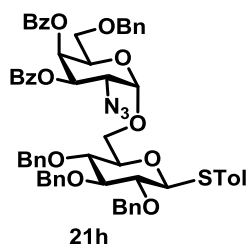

The glycosylation reaction was carried out according to **General Experimental Procedure** at 25 °C for 4 d, using acceptor **20h**<sup>6</sup> (89.5 mg, 0.16 mmol) with **17a** (162.7 mg, 0.24 mmol), DCM 1.6 mL, Ph<sub>3</sub>P=O (402.6 mg, 1.45 mmol) and TMSI (35  $\mu$ L, 0.24 mmol). The product was purified by silica gel column chromatography (PE-EA, 5:1) to afford **21h** (151.1 mg, 90%,  $\alpha/\beta >20:1$ ) as a white solid.  $[\alpha]_D^{23} = +122.8$  (c 0.24, CHCl<sub>3</sub>). <sup>1</sup>H NMR (400 MHz, CDCl<sub>3</sub>)  $\delta$  8.02 – 7.96 (m, 2H, Ar), 7.92 – 7.87 (m, 2H, Ar), 7.59 (t,  $J = 7.5$  Hz, 1H, Ar), 7.53 – 7.38 (m, 8H, Ar), 7.37 – 7.25 (m, 15H, Ar), 7.24 – 7.14 (m, 6H, Ar), 5.78 (d,  $J = 3.3$  Hz, 1H, H-4<sub>GalN</sub>), 5.65 (dd,  $J = 11.0, 3.3$  Hz, 1H, H-3<sub>GalN</sub>), 5.27 (d,  $J = 3.5$  Hz, 1H, H-1<sub>GalN</sub>), 4.96 – 4.84 (m, 4H, CH<sub>2</sub>-Bn), 4.76 – 4.66 (m, 3H, CH<sub>2</sub>-Bn, H-1<sub>Glc</sub>), 4.49 – 4.37 (m, 2H, CH<sub>2</sub>-Bn), 4.28 (t,  $J = 6.3$  Hz, 1H, H-5<sub>GalN</sub>), 3.88 (dd,  $J = 11.1, 3.4$  Hz, 3H, H-2<sub>GalN</sub>), 3.74 (t,  $J = 8.8$  Hz, 1H), 3.64 (t,  $J = 9.3$  Hz, 1H), 3.60 – 3.45 (m, 4H, H-6<sub>GalN</sub>, H-2<sub>Glc</sub>), 2.29 (s, 3H, CH<sub>3</sub>-STol). <sup>13</sup>C NMR (101 MHz, CDCl<sub>3</sub>)  $\delta$  165.5, 165.3, 138.5, 138.23, 138.19, 137.85, 137.83, 133.5, 133.3, 132.1, 130.0, 129.91, 129.88, 129.84, 129.7, 129.4, 128.65, 128.63, 128.53, 128.50, 128.43, 128.38, 128.3, 128.02, 127.98, 127.92, 127.89, 127.78, 127.69, 127.66, 98.6(C-1<sub>GalN</sub>), 87.5 (C-1<sub>Glc</sub>), 87.0, 81.0, 78.8, 77.7, 75.9, 75.5, 75.2, 73.4, 69.2, 69.0, 68.3, 68.1, 66.8, 58.7, 21.2. HRMS (ESI) calcd for C<sub>61</sub>H<sub>63</sub>N<sub>4</sub>O<sub>11</sub>S [M+NH<sub>4</sub>]<sup>+</sup> 1059.4209, found 1059.4205.

***p*-Methylphenyl *O*-(2-azido-3,4-di-*O*-benzoyl-6-*O*-benzyl-2-deoxy- $\alpha$ -D-galactopyranosyl)-(1 $\rightarrow$ 6)-2,3,4-tri-*O*-benzoyl-1-thio- $\beta$ -D-galactopyranoside (**21i**)**

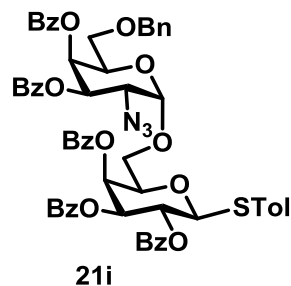

The glycosylation reaction was carried out according to **General Experimental Procedure** at 25 °C for 5 d, using acceptor **20i**<sup>7</sup> (87.2 mg, 0.15 mmol) with **17a** (147.4 mg, 0.22 mmol), DCM 1.5 mL, Ph<sub>3</sub>P=O (364.9 mg, 1.31 mmol) and TMSI (31 μL, 0.22 mmol). The product was purified by silica gel column chromatography (PE-EA, 5:1) to afford **21i** (135.6 mg, 86%, α/β >20:1) as a white solid.  $[\alpha]_D^{25} = +182.7$  (c 0.20, CHCl<sub>3</sub>). <sup>1</sup>H NMR (400 MHz, CDCl<sub>3</sub>) δ 7.98 (dd, *J* = 11.0, 7.8 Hz, 4H, Ar), 7.90 (dd, *J* = 10.9, 7.9 Hz, 4H, Ar), 7.76 (d, *J* = 7.8 Hz, 2H, Ar), 7.58 (t, *J* = 7.5 Hz, 2H, Ar), 7.50 (t, *J* = 8.0 Hz, 4H, Ar), 7.46 – 7.36 (m, 7H, Ar), 7.32 (t, *J* = 7.7 Hz, 2H, Ar), 7.26 – 7.15 (m, 9H, Ar), 5.98 (d, *J* = 3.2 Hz, 1H, H-4<sub>Gal</sub>), 5.85 (d, *J* = 3.2 Hz, 1H, H-4<sub>GalN</sub>), 5.79 (t, *J* = 9.9 Hz, 1H, H-2<sub>Gal</sub>), 5.71 (dd, *J* = 11.0, 3.2 Hz, 1H, H-3<sub>GalN</sub>), 5.62 (dd, *J* = 10.0, 3.2 Hz, 1H, H-3<sub>Gal</sub>), 5.12 – 5.06 (m, 2H, H-1<sub>GalN</sub>, H-1<sub>Gal</sub>), 4.49 (dd, *J* = 12.2, 5.7 Hz, 2H, H-5<sub>GalN</sub>, CH<sub>2</sub>-Bn), 4.41 (d, *J* = 12.1 Hz, 1H, CH<sub>2</sub>-Bn), 4.36 – 4.31 (m, 1H), 4.07 (dd, *J* = 10.5, 7.0 Hz, 1H), 3.89 (dd, *J* = 11.0, 3.6 Hz, 1H, H-2<sub>GalN</sub>), 3.79 (dd, *J* = 10.5, 4.4 Hz, 1H, H-6<sub>Gal</sub>), 3.64 – 3.51 (m, 2H, H-6<sub>GalN</sub>), 2.37 (s, 3H, CH<sub>3</sub>-STol). <sup>13</sup>C NMR (101 MHz, CDCl<sub>3</sub>) δ 165.6, 165.5, 165.42, 165.35, 165.26, 138.6, 137.8, 133.6, 133.48, 133.46, 133.39, 133.31, 133.26, 130.1, 130.0, 129.94, 129.90, 129.86, 129.6, 129.5, 129.4, 129.1, 129.0, 128.6, 128.5, 128.4, 128.3, 127.9, 127.72, 127.68, 98.7 (C-1<sub>GalN</sub>), 85.9 (C-1<sub>Gal</sub>), 76.6, 73.5, 73.2, 69.2, 69.0, 68.5, 68.3, 68.2, 68.0, 58.5, 21.3. HRMS (ESI) calcd for C<sub>61</sub>H<sub>57</sub>N<sub>4</sub>O<sub>14</sub>S [M+NH<sub>4</sub>]<sup>+</sup> 1101.3586, found 1101.3589.

***O*-(2-azido-3,4-di-*O*-benzoyl-6-*O*-benzyl-2-deoxy- $\alpha$ -D-galactopyranosyl)-(1 $\rightarrow$ 6)-1,2,3,4-di-*O*-isopropylidene- $\alpha$ -D-galactopyranoside (21j)**

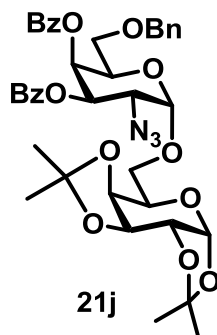

The glycosylation reaction was carried out according to **General Experimental Procedure** at 25 °C for 25 h, using acceptor **20j** (57.2 mg, 0.22 mmol) with **17a** (227.8 mg, 0.33 mmol), DCM 2.2 mL, Ph<sub>3</sub>P=O (551.3 mg, 1.98 mmol) and TMSI (47 μL, 0.33 mmol). The product was purified by silica gel column chromatography (PE-EA, 4:1) to afford **21j** (162 mg, 99%, α/β >20:1) as a yellow solid.  $[\alpha]_D^{22} = +115.1$  (c 0.15, CHCl<sub>3</sub>). <sup>1</sup>H NMR (400 MHz, CDCl<sub>3</sub>) δ 7.98 (d, *J* = 7.7 Hz, 2H, Ar), 7.88 (d, *J* = 7.7 Hz, 2H, Ar), 7.58 (t, *J* = 7.4 Hz, 1H, Ar), 7.52 – 7.39 (m, 3H, Ar), 7.31 (t, *J* = 7.7 Hz, 2H, Ar), 7.25 – 7.13 (m, 5H, Ar), 5.95 (d, *J* = 3.3 Hz, 1H, H-4<sub>GalN</sub>), 5.78 (dd, *J* = 11.1, 3.3 Hz, 1H, H-3<sub>GalN</sub>), 5.54 (d, *J* = 5.0 Hz, 1H, H-1<sub>Gal</sub>), 5.22 (d, *J* = 3.4 Hz, 1H, H-1<sub>GalN</sub>), 4.64 (dd, *J* = 7.8, 2.4 Hz, 1H, H-3<sub>Gal</sub>), 4.55 – 4.48 (m, 2H, H-5<sub>GalN</sub>, CH<sub>2</sub>-Bn), 4.43 – 4.31 (m, 3H, H-2<sub>Gal</sub>, H-4<sub>Gal</sub>, CH<sub>2</sub>-Bn), 4.10 (t, *J* = 6.5 Hz, 1H, H-5<sub>Gal</sub>), 3.95 (dd, *J* = 10.1, 6.3 Hz, 1H, H-6<sub>Gal</sub>), 3.89 – 3.80 (m, 2H, H-2<sub>GalN</sub>, H-6<sub>Gal</sub>), 3.60 (m, *J* = 9.7, 6.3 Hz, 2H, H-6<sub>GalN</sub>), 1.59 (s, 3H, CH<sub>3</sub>), 1.45 (s, 3H, CH<sub>3</sub>), 1.34 (s, 6H, CH<sub>3</sub>). <sup>13</sup>C NMR (101 MHz, CDCl<sub>3</sub>) δ 165.4, 137.7, 133.4, 133.2, 129.9, 129.8, 129.6, 129.4, 128.6, 128.4, 128.3, 127.7, 127.6, 109.4, 108.8, 98.7 (C-1<sub>GalN</sub>), 96.4 (C-1<sub>Gal</sub>), 73.4, 71.0, 70.8, 69.0, 68.9, 68.1, 68.0, 67.4, 66.5, 58.5, 26.2, 26.1, 25.1, 24.5. HRMS (ESI) calcd for C<sub>39</sub>H<sub>47</sub>N<sub>4</sub>O<sub>12</sub> [M+NH<sub>4</sub>]<sup>+</sup> 763.3185, found 763.3192.

**Methyl *O*-(2-azido-3,4-di-*O*-benzoyl-6-*O*-benzyl-2-deoxy- $\alpha$ -D-galactopyranosyl)-(1→6)-2,3,4-tri-*O*-benzyl- $\alpha$ -D-mannopyranoside (21k)**

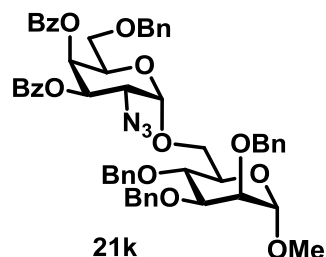

The glycosylation reaction was carried out according to **General Experimental Procedure** at 25 °C for 25h, using acceptor **20k**<sup>8</sup> (70.3 mg, 0.15 mmol) with **17a** (153.3 mg, 0.23 mmol), DCM 1.5 mL, Ph<sub>3</sub>P=O (374.4 mg, 1.36 mmol) and TMSI (33 μL, 0.23 mmol). The product was purified by silica gel column chromatography (PE-EA, 4:1 to 3:1) to afford **21k** (132.3 mg, 92%, α/β >20:1) as a white solid.  $[\alpha]_D^{23} = +166.9$  (c 0.17, CHCl<sub>3</sub>). <sup>1</sup>H NMR (400 MHz, CDCl<sub>3</sub>) δ 7.97 (d, *J* = 7.7 Hz, 2H, Ar), 7.87 (d, *J* = 7.7 Hz, 2H, Ar), 7.58 (t, *J* = 7.4 Hz, 1H, Ar), 7.51 – 7.41 (m, 3H, Ar), 7.39 – 7.25 (m, 18H, Ar), 7.23 – 7.18 (m, 3H, Ar), 7.17 – 7.12 (m, 1H, Ar), 5.93 (d, *J* = 3.2 Hz, 1H, H-4<sub>GalN</sub>), 5.76 (dd, *J* = 11.0, 3.3 Hz, 1H, H-3<sub>GalN</sub>), 5.29 (d, *J* = 3.4 Hz, 1H, H-1<sub>GalN</sub>), 4.99 (d, *J* = 11.2 Hz, 1H, CH<sub>2</sub>-Bn), 4.77 – 4.67 (m, 3H, CH<sub>2</sub>-Bn, H-1<sub>Man</sub>), 4.64 (m, 3H, CH<sub>2</sub>-Bn), 4.52 – 4.46 (m, 2H, CH<sub>2</sub>-Bn, H-5<sub>GalN</sub>), 4.38 (d, *J* = 11.9 Hz, 1H, CH<sub>2</sub>-Bn), 3.96 – 3.89 (m, 4H), 3.88 – 3.83 (m, 2H, H-2<sub>GalN</sub>), 3.81 (d, *J* = 2.0 Hz, 1H, H-2<sub>Man</sub>), 3.64 – 3.51 (m, 2H, H-6<sub>GalN</sub>), 3.37 (s, 3H, CH<sub>3</sub>). <sup>13</sup>C NMR (101 MHz, CDCl<sub>3</sub>) δ 165.4, 138.7, 138.6, 138.5, 137.7, 133.4, 133.3, 129.90, 129.88, 129.7, 129.5, 128.6, 128.49, 128.46, 128.44, 128.40, 128.38, 128.0, 127.90, 127.85, 127.80, 127.73, 127.70, 127.65, 99.1 (C-1<sub>Man</sub>), 98.2 (C-1<sub>GalN</sub>), 80.5, 75.2, 74.9, 73.5, 72.9, 72.2, 71.5, 69.1, 69.0, 68.1, 68.0, 67.2, 58.5, 54.9. HRMS (ESI) calcd for C<sub>55</sub>H<sub>59</sub>N<sub>4</sub>O<sub>12</sub> [M+NH<sub>4</sub>]<sup>+</sup> 967.4124, found 967.4130.

***p*-Methoxyphenyl *O*-(2-azido-3,4-di-*O*-benzoyl-6-*O*-benzyl-2-deoxy- $\alpha$ -D-galactopyranosyl)-(1→6)-2,3,4-tri-*O*-benzoyl- $\alpha$ -D-mannopyranoside (211)**

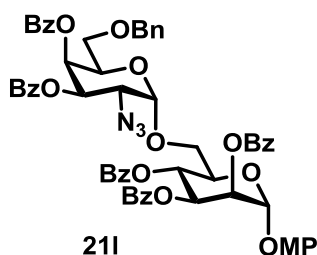

The glycosylation reaction was carried out according to **General Experimental Procedure** at 25 °C for 36 h, using acceptor **20I**<sup>9</sup> (94.2 mg, 0.16 mmol) with **17a** (159.9 mg, 0.24 mmol), DCM 1.6 mL, Ph<sub>3</sub>P=O (394.2 mg, 1.42 mmol) and TMSI (34 μL, 0.24 mmol). The product was purified by silica gel column chromatography (PE-EA, 5:1 to 3.5:1) to afford **21I** (158.9 mg, 93%, α/β >20:1) as a white solid.  $[\alpha]_D^{23} = +42.8$  (c 0.13, CHCl<sub>3</sub>). <sup>1</sup>H NMR (400 MHz, CDCl<sub>3</sub>) δ 8.17 – 8.11 (m, 2H, Ar), 8.05 – 8.00 (m, 2H, Ar), 7.94 (m, 2H, Ar), 7.92 – 7.84 (m, 4H, Ar), 7.60 – 7.40 (m, 10H, Ar), 7.35 (q, *J* = 7.7 Hz, 4H, Ar), 7.31 – 7.24 (m, 2H, Ar), 7.21 – 7.15 (m, 2H, Ar), 7.14 – 7.06 (m, 4H, Ar), 6.98 – 6.93 (m, 2H, Ar), 6.13 (dd, *J* = 10.1, 3.3 Hz, 1H, H-3<sub>Man</sub>), 6.07 (t, *J* = 10.0 Hz, 1H, H-4<sub>Man</sub>), 5.91 – 5.88 (m, 2H, H-4<sub>GalN</sub>, H-2<sub>Man</sub>), 5.76 (dd, *J* = 11.0, 3.3 Hz, 1H, H-3<sub>GalN</sub>), 5.69 (d, *J* = 1.8 Hz, 1H, H-1<sub>Man</sub>), 5.16 (d, *J* = 3.5 Hz, 1H, H-1<sub>GalN</sub>), 4.62 – 4.55 (m, 1H, H-5<sub>Man</sub>), 4.37 (t, *J* = 6.5 Hz, 1H, H-5<sub>GalN</sub>), 4.33 (d, *J* = 12.1 Hz, 1H, CH<sub>2</sub>-Bn), 4.20 (d, *J* = 12.1 Hz, 1H, CH<sub>2</sub>-Bn), 4.09 (dd, *J* = 11.0, 6.0 Hz, 1H, H-6<sub>Man</sub>), 3.91 (dd, *J* = 11.0, 3.4 Hz, 1H, H-2<sub>GalN</sub>), 3.80 – 3.79 (m, 1H, H-6<sub>Man</sub>), 3.78 (s, 3H, CH<sub>3</sub>-MP), 3.49 – 3.37 (m, 2H, H-6<sub>GalN</sub>). <sup>13</sup>C NMR (101 MHz, CDCl<sub>3</sub>) δ 165.8, 165.71, 165.67, 165.4, 165.2, 155.9, 150.1, 137.6, 133.62, 133.60, 133.4, 133.3, 130.1, 130.0, 129.92, 129.89, 129.87, 129.6, 129.5, 129.3, 129.2, 129.1, 128.7, 128.63, 128.61, 128.4, 128.3, 127.63, 127.60, 118.5, 115.0, 98.3 (C-1<sub>GalN</sub>), 97.4 (C-1<sub>Man</sub>), 73.4, 70.7, 70.23, 70.18, 69.5, 69.0, 68.2, 68.1, 67.2, 58.6, 55.8. HRMS (ESI) calcd for C<sub>61</sub>H<sub>57</sub>N<sub>4</sub>O<sub>16</sub> [M+NH<sub>4</sub>]<sup>+</sup> 1101.3764, found 1101.3766.

***p*-methylphenyl O-(2-azido-3,4-di-*O*-benzoyl-6-*O*-benzyl-2-deoxy- $\alpha$ -D-galactopyranosyl)-(1→5)-2-*O*-benzoyl-3-benzyl-1-thio- $\alpha$ -D-arabinoglycoside (21m)**

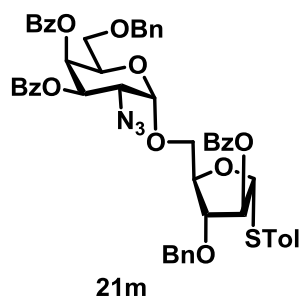

The glycosylation reaction was carried out according to **General Experimental Procedure** at 25 °C for 34 h, using acceptor **20m**<sup>10</sup> (73.1 mg, 0.16 mmol) with **17a** (164.1 mg, 0.24 mmol), DCM 1.6 mL, Ph<sub>3</sub>P=O (406.2 mg, 1.46 mmol) and TMSI (35 μL, 0.24 mmol). The product was purified by silica gel column chromatography (PE-EA, 5:1) to afford **21m** (149.2 mg, 98%, α/β >20:1) as a white solid.  $[\alpha]_D^{22} = +199.5$  (c 0.20, CHCl<sub>3</sub>). <sup>1</sup>H NMR (400 MHz, CDCl<sub>3</sub>) δ 8.05 (d, *J* = 7.7 Hz, 2H, Ar), 7.96 (d, *J* = 7.7 Hz, 2H, Ar), 7.89 (d, *J* = 7.8 Hz, 2H, Ar), 7.59 (t, *J* = 7.4 Hz, 1H, Ar), 7.54 – 7.36 (m, 11H, Ar), 7.33 (m, 4H, Ar), 7.29 – 7.22 (m, 1H, Ar), 7.20 – 7.09 (m, 6H, Ar), 5.81 (d, *J* = 3.3 Hz, 1H, H-4<sub>GalN</sub>), 5.63 (dd, *J* = 11.1, 3.3 Hz, 1H, H-3<sub>GalN</sub>), 5.59 (d, *J* = 3.0 Hz, 2H, H-1<sub>Ara</sub>, H-2<sub>Ara</sub>), 5.21 (d, *J* = 3.5 Hz, 1H, H-1<sub>GalN</sub>), 4.83 (d, *J* = 11.8 Hz, 1H, CH<sub>2</sub>-Bn), 4.65 – 4.57 (m, 2H, H-4<sub>Ara</sub>, CH<sub>2</sub>-Bn), 4.44 (d, *J* = 12.0 Hz, 1H, CH<sub>2</sub>-Bn), 4.34 (d, *J* = 12.0 Hz, 1H, CH<sub>2</sub>-Bn), 4.27 (dd, *J* = 6.6, 2.3 Hz, 1H, H-3<sub>Ara</sub>), 4.20 (t, *J* = 6.3 Hz, 1H, H-5<sub>GalN</sub>), 3.94 – 3.83 (m, 3H, H-2<sub>GalN</sub>, H-5<sub>Ara</sub>, H-6<sub>Ara</sub>), 3.56 – 3.44 (m, 2H, H-6<sub>GalN</sub>), 2.32 (s, 3H, CH<sub>3</sub>-STol). <sup>13</sup>C NMR (101 MHz, CDCl<sub>3</sub>) δ 165.6, 165.4, 165.2, 138.1, 137.7, 137.3, 133.53, 133.49, 133.3, 133.2, 130.1, 130.0, 129.90, 129.86, 129.6, 129.4, 128.7, 128.65, 128.60, 128.5, 128.43, 128.41, 128.2, 127.73, 127.71, 98.5 (C-1<sub>GalN</sub>), 91.4 (C-1<sub>Ara</sub>), 82.64, 82.58, 80.8, 73.5, 72.8, 69.2, 69.0, 68.33, 68.27, 66.5, 58.6, 21.2. HRMS (ESI) calcd for C<sub>53</sub>H<sub>53</sub>N<sub>4</sub>O<sub>11</sub>S [M+NH<sub>4</sub>]<sup>+</sup> 953.3426, found 953.3418.

**L-Serine**      ***N*-(benzyloxycarbonyl)-*O*-(2-azido-3,4-di-*O*-benzoyl-6-*O*-benzyl-2-deoxy- $\alpha$ -D-galactopyranosyl)-benzyl ester (21n)**

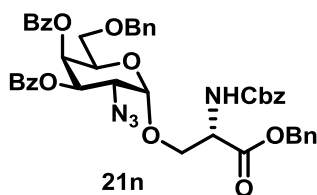

The glycosylation reaction was carried out according to **General Experimental Procedures** at 25°C for 8 d, using acceptor **15** (93.2 mg, 0.28 mmol) with **17a** (127.3 mg, 0.19 mmol), DCM 1.9 mL, Ph<sub>3</sub>P=O (315.1 mg, 1.13 mmol) and TMSI (27 μL, 0.19 mmol). The product was purified by silica gel column chromatography (PE-EA, 3:1) to afford **21n** (112.3 mg, 73%, α/β >20:1) as a yellow solid.  $[\alpha]_D^{25} = +168.8$  (c 0.17, CHCl<sub>3</sub>). <sup>1</sup>H NMR (400 MHz, CDCl<sub>3</sub>) δ 7.94 (d, *J* = 7.8 Hz, 2H, Ar), 7.87 (d, *J* = 7.7 Hz, 2H, Ar), 7.59 (t, *J* = 7.4 Hz, 1H, Ar), 7.50 (t, *J* = 7.5 Hz, 1H, Ar), 7.44 (t, *J* = 7.7 Hz, 2H, Ar), 7.40 – 7.28 (m, 12H, Ar), 7.22 – 7.14 (m, 5H, Ar), 6.10 (d, *J* = 8.5 Hz, 1H, NH-Ser), 5.81 (d, *J* = 3.3 Hz, 1H, H-4), 5.60 (dd, *J* = 11.1, 3.3 Hz, 1H, H-3), 5.24 (s, 2H), 5.16 – 5.07 (m, 2H), 5.05 (d, *J* = 3.6 Hz, 1H, H-1), 4.67 (d, *J* = 8.2 Hz, 1H, CH-Ser), 4.47 (d, *J* = 12.2 Hz, 1H, CH<sub>2</sub>-Bn), 4.36 – 4.23 (m, 3H, H-5, CH<sub>2</sub>-Bn, CH<sub>2</sub>-Ser), 4.06 (dd, *J* = 10.9, 3.0 Hz, 1H, CH<sub>2</sub>-Ser), 3.80 (dd, *J* = 11.1, 3.6 Hz, 1H, H-2), 3.57 – 3.44 (m, 2H, H-6). <sup>13</sup>C NMR (101 MHz, CDCl<sub>3</sub>) δ 169.6, 165.4, 165.3, 156.2, 137.5, 136.3, 135.2, 133.5, 133.4, 129.9, 129.8, 129.4, 129.2, 128.8, 128.69, 128.65, 128.60, 128.43, 128.40, 128.36, 128.3, 127.7, 99.9 (C-1), 73.5, 70.5, 68.8, 68.75, 68.71, 68.0, 67.9, 67.3, 58.3, 54.8. HRMS (ESI) calcd for C<sub>45</sub>H<sub>46</sub>N<sub>5</sub>O<sub>11</sub> [M+NH<sub>4</sub>]<sup>+</sup> 832.3188, found 832.3192.

**L-Serine** *N*-(*t*-Butyloxycarbonyl)-*O*-(2-azido-3,4-di-*O*-benzoyl-6-*O*-benzyl-2-deoxy- $\alpha$ -D-galactopyranosyl)-benzyl ester(**21o**)

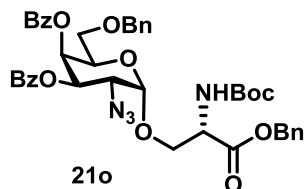

The glycosylation reaction was carried out according to **General Experimental Procedures** at 25°C for 7 d, using acceptor *N*-Boc-L-serine benzyl ester **20o** (42.3 mg, 0.14 mmol) with **17a** (145 mg, 0.21 mmol), DCM 1.4 mL, Ph<sub>3</sub>P=O (358.9 mg, 1.29

mmol) and TMSI (31  $\mu$ L, 0.21 mmol). The product was purified by silica gel column chromatography (PE-EA, 3:1) to afford **21o** (62.1 mg, 55%,  $\alpha/\beta >20:1$ ) as a yellow solid.  $[\alpha]_D^{20} = +180.4$  (c 0.20,  $\text{CHCl}_3$ ).  $^1\text{H NMR}$  (400 MHz,  $\text{CDCl}_3$ )  $\delta$  7.95 (d,  $J = 7.7$  Hz, 2H, Ar), 7.87 (d,  $J = 7.7$  Hz, 2H, Ar), 7.60 (t,  $J = 7.4$  Hz, 1H, Ar), 7.51 (t,  $J = 7.4$  Hz, 1H, Ar), 7.45 (t,  $J = 7.7$  Hz, 2H, Ar), 7.40 – 7.29 (m, 7H, Ar), 7.24 – 7.13 (m, 5H, Ar), 5.87 (d,  $J = 3.3$  Hz, 1H, H-4), 5.69 – 5.55 (m, 2H, H-3, NH-Ser), 5.28 – 5.18 (m, 2H,  $\text{CH}_2\text{-Bn}$ ), 5.05 (d,  $J = 3.6$  Hz, 1H, H-1), 4.65 – 4.56 (m, 1H, CH-Ser), 4.52 (d,  $J = 12.1$  Hz, 1H), 4.37 (d,  $J = 12.1$  Hz, 1H), 4.31 (t,  $J = 6.5$  Hz, 1H, H-5), 4.18 (dd,  $J = 10.6, 3.3$  Hz, 1H,  $\text{CH}_2\text{-Ser}$ ), 4.04 (dd,  $J = 10.6, 3.1$  Hz, 1H,  $\text{CH}_2\text{-Ser}$ ), 3.81 (dd,  $J = 11.1, 3.5$  Hz, 1H, H-2), 3.61-3.44 (m, 2H, H-6), 1.46 (s, 9H,  $\text{CH}_3\text{-}t\text{-Bu}$ ).  $^{13}\text{C NMR}$  (101 MHz,  $\text{CDCl}_3$ )  $\delta$  170.0, 165.42, 165.37, 155.7, 137.5, 135.3, 133.5, 133.4, 129.92, 129.87, 129.5, 129.2, 128.8, 128.7, 128.6, 128.5, 128.4, 127.80, 127.77, 99.6 (C-1), 80.4, 73.6, 70.1, 68.9, 68.7, 68.6, 67.9, 67.8, 58.3, 54.3, 28.4. HRMS (ESI) calcd for  $\text{C}_{42}\text{H}_{44}\text{N}_4\text{O}_{11}\text{Na}$   $[\text{M}+\text{Na}]^+$  803.2899, found 803.2911.

**L-Serine *N*-(9H-fluoren-9-ylmethoxy)carbonyl)-*O*-(2-azido-3,4-di-*O*-benzoyl-6-*O*-benzyl-2- deoxy- $\alpha$ -D-galactopyranosyl)-benzyl ester(**21p**)**

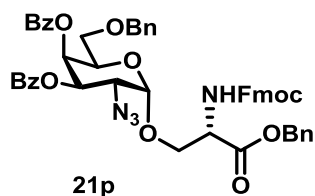

The glycosylation reaction was carried out according to **General Experimental Procedures** at 25°C for 7 d, using acceptor Fmoc-*O*-benzyl-L-serine **20p** (52.8 mg, 0.13 mmol) with **17a** (128 mg, 0.19 mmol), DCM 1.3 mL,  $\text{Ph}_3\text{P}=\text{O}$  (316.8 mg, 1.14 mmol) and TMSI (27  $\mu$ L, 0.19 mmol). The product was purified by silica gel column chromatography (PE-EA, 3:1) to afford **21p** (84 mg, 74%,  $\alpha/\beta >20:1$ ) as a yellow solid.  $[\alpha]_D^{20} = +122.8$  (c 0.32,  $\text{CHCl}_3$ ).  $^1\text{H NMR}$  (400 MHz,  $\text{CDCl}_3$ )  $\delta$  7.97 (d,  $J = 7.7$  Hz, 2H, Ar), 7.89 (d,  $J = 7.8$  Hz, 2H, Ar), 7.75 (d,  $J = 7.5$  Hz, 2H, Ar), 7.62 (d,  $J = 7.8$  Hz, 3H, Ar), 7.51 (t,  $J = 7.5$  Hz, 1H, Ar), 7.46 (t,  $J = 7.7$  Hz, 2H, Ar), 7.41 – 7.27 (m, 11H, Ar), 7.20 – 7.12 (m, 5H, Ar), 6.22 (d,  $J = 8.4$  Hz, 1H, NH-Ser), 5.84 (d,  $J = 3.2$



Hz, 1H, H-4), 5.65 (dd,  $J = 11.1, 3.3$  Hz, 1H, H-3), 5.27 (s, 2H, CH<sub>2</sub>-Bn), 5.04 (d,  $J = 3.6$  Hz, 1H, H-1), 4.67 (d,  $J = 8.3$  Hz, 1H), 4.46 (d,  $J = 12.1$  Hz, 1H), 4.40 – 4.26 (m, 5H), 4.21 (t,  $J = 7.3$  Hz, 1H), 4.10 – 4.03 (m, 1H), 3.82 (dd,  $J = 11.2, 3.6$  Hz, 1H, H-2), 3.59 – 3.44 (m, 2H, H-6). <sup>13</sup>C NMR (101 MHz, CDCl<sub>3</sub>)  $\delta$  169.6, 165.4, 156.1, 144.0, 143.9, 141.40, 141.37, 137.5, 135.2, 133.6, 133.4, 129.92, 129.86, 129.4, 129.2, 128.8, 128.73, 128.68, 128.5, 128.4, 127.8, 127.7, 127.22, 127.21, 125.4, 125.3, 120.0, 100.0 (C-1), 77.4, 73.5, 70.6, 68.9, 68.83, 68.78, 68.2, 67.9, 67.4, 58.4, 54.8, 47.2, 29.8. HRMS (ESI) calcd for C<sub>52</sub>H<sub>46</sub>N<sub>4</sub>O<sub>11</sub>Na [M+Na]<sup>+</sup> 925.3055, found 925.3060.

**L-Threonine *N*-(benzyloxycarbonyl)-*O*-(2-azido-3,4-di-*O*-benzoyl-6-*O*-benzyl-2-deoxy- $\alpha$ -D-galactopyranosyl)-benzyl ester (21q)**

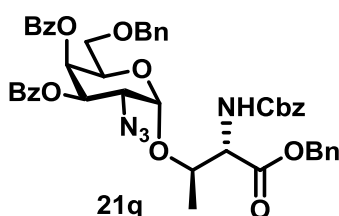

The glycosylation reaction was carried out according to **General Experimental Procedures** at 25°C for 7 d, using acceptor Benzyloxycarbonyl-L-threonine benzyl ester **20q** (108 mg, 0.31 mmol) with **17a** (141.4 mg, 0.21 mmol), DCM 2.1 mL, Ph<sub>3</sub>P=O (350 mg, 1.26 mmol) and TMSI (30  $\mu$ L, 0.19 mmol). The product was purified by silica gel column chromatography (PE-EA, 5:1) to afford **21q** (94.1 mg, 54%,  $\alpha/\beta >20:1$ ) as a yellow solid.  $[\alpha]_D^{24} = +192.3$  (c 0.21, CHCl<sub>3</sub>). <sup>1</sup>H NMR (400 MHz, CDCl<sub>3</sub>)  $\delta$  7.94 (d,  $J = 7.7$  Hz, 2H, Ar), 7.87 (d,  $J = 7.7$  Hz, 2H, Ar), 7.60 (t,  $J = 7.4$  Hz, 1H, Ar), 7.51 (t,  $J = 7.4$  Hz, 1H, Ar), 7.45 (t,  $J = 7.7$  Hz, 2H, Ar), 7.40 – 7.28 (m, 12H, Ar), 7.23 – 7.13 (m, 5H, Ar), 5.87 (d,  $J = 3.2$  Hz, 1H, H-4), 5.68 (d,  $J = 9.6$  Hz, 1H), 5.58 (dd,  $J = 11.1, 3.2$  Hz, 1H, H-3), 5.27 – 5.16 (m, 2H), 5.16 (s, 2H), 5.01 (d,  $J = 3.7$  Hz, 1H, H-1), 4.54 – 4.47 (m, 3H), 4.41 – 4.34 (m, 2H, H-5), 3.79 (dd,  $J = 11.1, 3.7$  Hz, 1H, H-2), 3.58 – 3.49 (m, 2H, H-6), 1.38 (d,  $J = 6.4$  Hz, 3H, CH<sub>3</sub>-Thr). <sup>13</sup>C NMR (101 MHz, CDCl<sub>3</sub>)  $\delta$  170.2, 165.4, 165.3, 157.0, 137.5, 136.3, 135.2, 133.6, 133.4, 129.89, 129.85, 129.4, 129.2, 128.8, 128.7, 128.64, 128.62, 128.4, 128.4, 128.2,

128.1, 127.82, 127.78, 127.7, 99.4 (C-1), 76.8, 73.6, 69.3, 68.72, 68.69, 68.2, 67.7, 67.3, 59.0, 58.7, 18.7. HRMS (ESI) calcd for C<sub>46</sub>H<sub>44</sub>N<sub>4</sub>O<sub>11</sub>Na [M+Na]<sup>+</sup> 851.2904, found 851.2904.

**Methyl *O*-(2-azido-3,4-di-*O*-benzoyl-6-*O*-benzyl-2-deoxy- $\alpha$ -D-galactopyranosyl)-(1 $\rightarrow$ 4)-2,3,6-tri-*O*-benzyl- $\alpha$ -D-glucopyranoside (**21r**)**

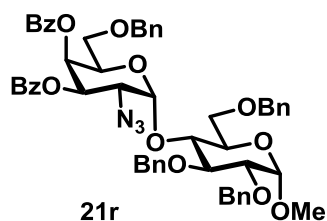

The glycosylation reaction was carried out according to **General Experimental Procedure** at 25 °C for 59 h, using acceptor **20r**<sup>11</sup> (68.2 mg, 0.15 mmol) with **17a** (148.6 mg, 0.22 mmol), DCM 1.5 mL, Ph<sub>3</sub>P=O (367.7 mg, 1.32 mmol) and TMSI (32  $\mu$ L, 0.22 mmol). The product was purified by silica gel column chromatography (PE-EA, 5:1 to 3:1) to afford **21r** (126.3 mg, 91%,  $\alpha/\beta >20:1$ ) as a yellow solid.  $[\alpha]_D^{23} = +156.6$  (c 0.14, CHCl<sub>3</sub>). <sup>1</sup>H NMR (400 MHz, CDCl<sub>3</sub>)  $\delta$  7.92 (d,  $J = 7.7$  Hz, 2H, Ar), 7.88 (d,  $J = 7.7$  Hz, 2H, Ar), 7.56 (t,  $J = 7.5$  Hz, 1H, Ar), 7.49 (t,  $J = 7.4$  Hz, 1H, Ar), 7.44 – 7.25 (m, 20H, Ar), 7.14 – 7.06 (m, 4H, Ar), 5.94 (d,  $J = 3.8$  Hz, 1H, H-1<sub>GalN</sub>), 5.87 (d,  $J = 3.2$  Hz, 1H, H-4<sub>GalN</sub>), 5.66 (dd,  $J = 11.2, 3.2$  Hz, 1H, H-3<sub>GalN</sub>), 5.15 (d,  $J = 11.0$  Hz, 1H, CH<sub>2</sub>-Bn), 4.89 (d,  $J = 11.0$  Hz, 1H, CH<sub>2</sub>-Bn), 4.73 (d,  $J = 12.0$  Hz, 1H, CH<sub>2</sub>-Bn), 4.67 – 4.60 (m, 3H, CH<sub>2</sub>-Bn, H-1<sub>Glc</sub>), 4.54 (d,  $J = 12.3$  Hz, 1H, CH<sub>2</sub>-Bn), 4.31 – 4.21 (m, 2H, H-5<sub>GalN</sub>, CH<sub>2</sub>-Bn), 4.18 – 4.06 (m, 2H, H-3<sub>Glc</sub>, CH<sub>2</sub>-Bn), 4.01 (t,  $J = 9.1$  Hz, 1H, H-4<sub>Glc</sub>), 3.89 – 3.69 (m, 4H, H-2<sub>GalN</sub>, H-5<sub>Glc</sub>, H-6<sub>Glc</sub>), 3.62 (dd,  $J = 9.5, 3.5$  Hz, 1H, H-2<sub>Glc</sub>), 3.40 (s, 3H, CH<sub>3</sub>-OMe), 3.36 (d,  $J = 6.5$  Hz, 2H, H-6<sub>GalN</sub>). <sup>13</sup>C NMR (101 MHz, CDCl<sub>3</sub>)  $\delta$  165.4, 139.0, 138.4, 138.0, 137.6, 133.4, 133.3, 129.9, 129.8, 129.6, 129.4, 128.6, 128.5, 128.43, 128.41, 128.37, 128.26, 128.22, 128.1, 127.7, 127.6, 127.5, 127.4, 98.2 (C-1<sub>GalN</sub>), 97.7 (C-1<sub>Glc</sub>), 82.0, 80.7, 74.9, 73.8, 73.5, 73.3, 73.2, 69.5, 69.4, 69.0, 68.7, 68.6, 67.8, 58.4, 55.4. HRMS (ESI) calcd for C<sub>55</sub>H<sub>59</sub>N<sub>4</sub>O<sub>12</sub> [M+NH<sub>4</sub>]<sup>+</sup> 967.4124, found 967.4133.

**Methyl *O*-(2-azido-3,4-di-*O*-benzoyl-6-*O*-benzyl-2-deoxy- $\alpha$ -D-galactopyranosyl)-(1 $\rightarrow$ 3)-2,4,6- tri-*O*-benzyl- $\alpha$ -D-glucopyranoside (21s)**

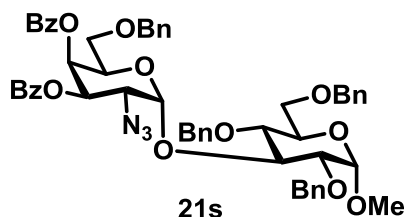

The glycosylation reaction was carried out according to **General Experimental Procedures** at 25 °C for 50h, using acceptor **20s**<sup>12</sup> (66.4 mg, 0.14 mmol) with **17a** (144.6 mg, 0.21 mmol), DCM 1.4 mL, Ph<sub>3</sub>P=O (357.9 mg, 1.29 mmol) and TMSI (31  $\mu$ L, 0.21 mmol). The product was purified by silica gel column chromatography (PE-EA, 3:1) to afford **21s** (134.4 mg, 99%,  $\alpha/\beta >20:1$ ) as a white solid.  $[\alpha]_D^{21} = +165.2$  (c 0.31, CHCl<sub>3</sub>). <sup>1</sup>H NMR (400 MHz, CDCl<sub>3</sub>)  $\delta$  7.93 (t,  $J = 8.5$  Hz, 4H, Ar), 7.54 (t,  $J = 7.5$  Hz, 1H, Ar), 7.49 (t,  $J = 7.5$  Hz, 1H, Ar), 7.46 – 7.37 (m, 6H, Ar), 7.37 – 7.24 (m, 12H, Ar), 7.22 – 7.18 (m, 2H, Ar), 7.16 – 7.08 (m, 4H, Ar), 5.88 – 5.81 (m, 2H, H-4<sub>GalN</sub>, H-3<sub>GalN</sub>), 5.72 (d,  $J = 3.5$  Hz, 1H, H-1<sub>GalN</sub>), 4.93 – 4.84 (m, 2H, H-5<sub>GalN</sub>, CH<sub>2</sub>-Bn), 4.78 – 4.71 (m, 2H, H-1<sub>Glc</sub>, CH<sub>2</sub>-Bn), 4.65 (d,  $J = 11.5$  Hz, 2H, CH<sub>2</sub>-Bn), 4.56 (d,  $J = 10.9$  Hz, 1H, CH<sub>2</sub>-Bn), 4.51 (d,  $J = 12.1$  Hz, 1H, CH<sub>2</sub>-Bn), 4.28 (t,  $J = 9.4$  Hz, 1H, H-3<sub>Glc</sub>), 4.22 (s, 2H, CH<sub>2</sub>-Bn), 3.91 – 3.79 (m, 2H, H-2<sub>GalN</sub>, H-4<sub>Glc</sub>), 3.76 (d,  $J = 9.5$  Hz, 2H), 3.70 – 3.59 (m, 2H, H-2<sub>Glc</sub>), 3.49 (dd,  $J = 9.9, 5.9$  Hz, 1H, H-6<sub>GalN</sub>), 3.37 – 3.28 (m, 4H, CH<sub>3</sub>-OMe, H-6<sub>GalN</sub>). <sup>13</sup>C NMR (101 MHz, CDCl<sub>3</sub>)  $\delta$  165.5, 165.4, 138.2, 138.1, 137.78, 137.76, 133.2, 129.9, 129.81, 129.76, 129.5, 128.74, 128.66, 128.58, 128.50, 128.47, 128.42, 128.37, 128.31, 128.2, 128.1, 128.0, 127.9, 127.83, 127.77, 127.6, 127.4, 127.3, 98.1 (C-1<sub>GalN</sub>), 97.6 (C-1<sub>Glc</sub>), 79.4, 78.6, 75.8, 74.0, 73.7, 73.3, 73.0, 70.1, 69.3, 69.2, 68.4, 67.9, 67.4, 58.7, 55.1. HRMS (ESI) calcd for C<sub>55</sub>H<sub>59</sub>N<sub>4</sub>O<sub>12</sub> [M+NH<sub>4</sub>]<sup>+</sup> 967.4124, found 967.4129.

**Methyl *O*-(2-azido-3,4-di-*O*-benzoyl-6-*O*-benzyl-2-deoxy- $\alpha$ -D-galactopyranosyl)-(1 $\rightarrow$ 2)-3,4,6-tri-*O*-benzyl- $\alpha$ -D-glucopyranoside (21t)**

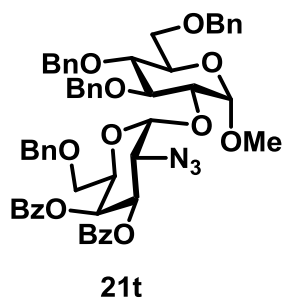

The glycosylation reaction was carried out according to **General Experimental Procedures** at 25 °C for 60h, using acceptor **20t**<sup>13</sup> (73.9 mg, 0.16 mmol) with **17a** (160.7 mg, 0.24 mmol), DCM 1.6 mL, Ph<sub>3</sub>P=O (397.9 mg, 1.43 mmol) and TMSI (34 μL, 0.24 mmol). The product was purified by silica gel column chromatography (PE-EA, 5:1-3:1) to afford **21t** (135.6 mg, 90%, α/β >20:1) as a white solid.  $[\alpha]_D^{23} = +192.7$  (c 0.33, CHCl<sub>3</sub>). <sup>1</sup>H NMR (400 MHz, CDCl<sub>3</sub>) δ 7.95 (d, *J* = 7.9 Hz, 2H, Ar), 7.90 (d, *J* = 7.9 Hz, 2H, Ar), 7.58 – 7.45 (m, 4H, Ar), 7.44 – 7.22 (m, 15H, Ar), 7.22 – 7.10 (m, 7H, Ar), 5.83 (d, *J* = 11.2 Hz, 1H, H-3<sub>GalN</sub>), 5.67 (s, 1H, H-4<sub>GalN</sub>), 5.28 (s, 1H, H-1<sub>GalN</sub>), 5.01 (m, 2H, H-1<sub>Glc</sub>, CH<sub>2</sub>-Bn), 4.88 (d, *J* = 10.8 Hz, 2H, CH<sub>2</sub>-Bn), 4.69 – 4.46 (m, 4H, H-5<sub>GalN</sub>, CH<sub>2</sub>-Bn), 4.18 (s, 2H, CH<sub>2</sub>-Bn), 4.11 (t, *J* = 9.5 Hz, 1H, H-3<sub>Glc</sub>), 3.96 (d, *J* = 10.5 Hz, 2H, H-2<sub>GalN</sub>, H-2<sub>Glc</sub>), 3.81 (dd, *J* = 22.4, 10.5 Hz, 2H), 3.69 (d, *J* = 10.3 Hz, 2H, H-4<sub>Glc</sub>), 3.52 – 3.41 (m, 4H, H-6<sub>GalN</sub>, CH<sub>3</sub>-OMe), 3.27 (t, *J* = 7.9 Hz, 1H, H-6<sub>GalN</sub>). <sup>13</sup>C NMR (101 MHz, CDCl<sub>3</sub>) δ 165.3, 165.2, 138.3, 138.2, 138.0, 137.9, 133.3, 133.2, 129.8, 129.7, 129.6, 129.4, 128.6, 128.5, 128.4, 128.3, 128.25, 128.17, 127.94, 127.90, 127.8, 127.7, 127.6, 127.5, 127.4, 96.5 (C-1<sub>Glc</sub>), 95.1 (C-1<sub>GalN</sub>), 80.8, 78.4, 76.4, 75.03, 74.96, 73.6, 72.8, 70.4, 69.1, 69.0, 68.6, 68.1, 67.7, 60.3, 58.2, 55.4. HRMS (ESI) calcd for C<sub>55</sub>H<sub>59</sub>N<sub>4</sub>O<sub>12</sub> [M+NH<sub>4</sub>]<sup>+</sup> 967.4124, found 967.4120.

**Tetrahydropyran-4-yl 2-azido-3,4-di-*O*-benzoyl-6-*O*-benzyl-2-deoxy- $\alpha$ -D-galactopyranoside (21u)**

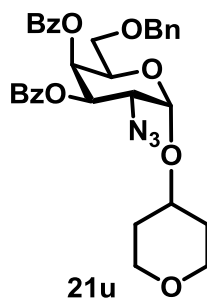

The glycosylation reaction was carried out according to **General Experimental Procedures** at 25 °C for 43h, using acceptor **20u** (19.5 mg, 0.19 mmol) with **17a** (193.2 mg, 0.29 mmol), DCM 1.9 mL, Ph<sub>3</sub>P=O (478.1 mg, 1.72 mmol) and TMSI (41 μL, 0.29 mmol). The product was purified by silica gel column chromatography (PE-EA, 5:1) to afford **21u** (98.2 mg, 88%, α/β >20:1) as a white solid.  $[\alpha]_D^{25} = +193.1$  (c 0.14, CHCl<sub>3</sub>). <sup>1</sup>H NMR (400 MHz, CDCl<sub>3</sub>) δ 7.98 (d, *J* = 7.7 Hz, 2H, Ar), 7.88 (d, *J* = 7.7 Hz, 2H, Ar), 7.61 (t, *J* = 7.5 Hz, 1H, Ar), 7.54 – 7.42 (m, 3H, Ar), 7.33 (t, *J* = 7.6 Hz, 2H, Ar), 7.22 (s, 5H, Ar), 5.93 (s, 1H, H-4), 5.79 (d, *J* = 11.2 Hz, 1H, H-3), 5.32 (s, 1H, H-1), 4.54 – 4.46 (m, 2H, CH<sub>2</sub>-Bn), 4.41 (d, *J* = 12.1 Hz, 1H, CH<sub>2</sub>-Bn), 4.02 – 3.90 (m, 3H), 3.83 (d, *J* = 11.2 Hz, 1H, H-2), 3.59 (d, *J* = 6.4 Hz, 2H), 3.54 – 3.42 (m, 2H), 2.05 – 1.93 (m, 2H), 1.85 – 1.70 (m, 2H). <sup>13</sup>C NMR (101 MHz, CDCl<sub>3</sub>) δ 165.50, 165.46, 137.6, 133.5, 133.4, 129.92, 129.88, 129.5, 129.3, 128.7, 128.4, 127.8, 127.6, 97.1 (C-1), 74.0, 73.6, 69.0, 68.9, 68.7, 68.4, 65.6, 65.5, 58.1, 33.5, 31.8. HRMS (ESI) calcd for C<sub>32</sub>H<sub>33</sub>N<sub>3</sub>O<sub>8</sub>Na [M+Na]<sup>+</sup> 610.2165, found 610.2164.

**2,3-Dihydro-1*H*-inden-2-yl 2-azido-3,4-di-*O*-benzoyl-6-*O*-benzyl-2-deoxy-α-*D*-galactopyranoside (21v)**

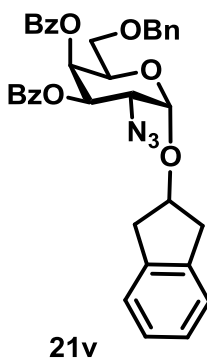

The glycosylation reaction was carried out according to **General Experimental Procedures** at 25 °C for 48 h, using acceptor **20v** (20.6 mg, 0.15 mmol) with **17a** (155.4 mg, 0.23 mmol), DCM 1.5 mL, Ph<sub>3</sub>P=O (384.5 mg, 1.38 mmol) and TMSI (33 μL, 0.23 mmol). The product was purified by silica gel column chromatography (PE-EA, 20:1-10:1) to afford **21v** (87.6 mg, 92%, α/β >20:1) as a white solid.  $[\alpha]_D^{25} = +230.0$  (c 0.15, CHCl<sub>3</sub>). <sup>1</sup>H NMR (400 MHz, CDCl<sub>3</sub>) δ 7.98 (d, *J* = 7.6 Hz, 2H, Ar), 7.86 (d, *J* = 7.6 Hz, 2H, Ar), 7.59 (t, *J* = 7.5 Hz, 1H, Ar), 7.51 – 7.40 (m, 3H, Ar), 7.34 – 7.13 (m, 11H, Ar), 5.90 (s, 1H, H-4), 5.73 (d, *J* = 11.1 Hz, 1H, H-3), 5.33 (s, 1H, H-1), 4.71 (t, *J* = 6.1 Hz, 1H), 4.52 (d, *J* = 11.9 Hz, 1H, CH<sub>2</sub>-Bn), 4.48 – 4.37 (m, 2H, CH<sub>2</sub>-Bn), 3.82 (d, *J* = 11.0 Hz, 1H, H-2), 3.68 – 3.54 (m, 2H), 3.31 – 3.19 (m, 3H), 3.13 (dd, *J* = 16.2, 4.8 Hz, 1H). <sup>13</sup>C NMR (101 MHz, CDCl<sub>3</sub>) δ 165.4, 140.5, 140.2, 137.6, 133.5, 133.3, 129.88, 129.85, 129.5, 129.3, 128.6, 128.5, 128.42, 128.37, 127.8, 127.7, 126.8, 124.74, 124.71, 98.3 (C-1), 80.6, 73.6, 69.0, 68.9, 68.7, 68.4, 58.1, 39.9, 39.3. HRMS (ESI) calcd for C<sub>36</sub>H<sub>33</sub>N<sub>3</sub>O<sub>7</sub>Na [M+Na]<sup>+</sup> 642.2216, found 642.2216.

**Cyclododecyl 2-azido-3,4-di-*O*-benzoyl-6-*O*-benzyl-2-deoxy- $\alpha$ -D-galactopyranoside (**21w**)**

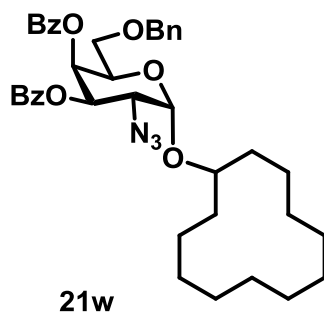

The glycosylation reaction was carried out according to **General Experimental Procedures** at 25°C for 38 h, using acceptor **20w** (27.9 mg, 0.15 mmol) with **17a** (153.3 mg, 0.23 mmol), DCM 1.5 mL, Ph<sub>3</sub>P=O (379.4 mg, 1.36 mmol) and TMSI (33 μL, 0.23 mmol). The product was purified by silica gel column chromatography (PE-EA, 25:1) to afford **21w** (93.6 mg, 92%, α/β >20:1) as a white solid.  $[\alpha]_D^{25} = +261.6$  (c 0.11, CHCl<sub>3</sub>). <sup>1</sup>H NMR (400 MHz, CDCl<sub>3</sub>) δ 7.98 (d, *J* = 7.8 Hz, 2H, Ar), 7.88 (d, *J* = 7.6 Hz, 2H, Ar), 7.57 (d, *J* = 8.8 Hz, 1H, Ar), 7.53 – 7.40 (m, 3H, Ar),

7.36 – 7.28 (m, 2H, Ar), 7.27 – 7.13 (m, 5H, Ar), 5.94 (s, 1H, H-4), 5.76 (d,  $J = 11.1$  Hz, 1H, H-3), 5.27 (s, 1H, H-1), 4.58 – 4.34 (m, 3H, H-5, CH<sub>2</sub>-Bn), 3.96 – 3.77 (m, 2H, H-2), 3.59 (s, 2H, H-6), 1.83 – 1.70 (m, 2H), 1.63 (s, 2H), 1.52 – 1.24 (m, 18H). <sup>13</sup>C NMR (101 MHz, CDCl<sub>3</sub>)  $\delta$  165.45, 165.41, 137.6, 133.4, 133.3, 129.9, 129.8, 129.5, 129.3, 128.6, 128.3, 127.68, 127.66, 97.0 (C-1), 76.9, 76.8, 73.5, 69.1, 69.0, 68.3, 58.3, 30.0, 28.6, 24.64, 24.55, 24.1, 23.6, 23.5, 23.1, 22.9, 21.3, 20.6. HRMS (ESI) calcd for C<sub>39</sub>H<sub>47</sub>N<sub>3</sub>O<sub>7</sub>Na [M+Na]<sup>+</sup> 692.3312, found 692.3311.

**(+)-Menthyl 2-azido-3,4-di-O-benzoyl-6-O-benzyl-2-deoxy- $\alpha$ -D-galactopyranoside (21x)**

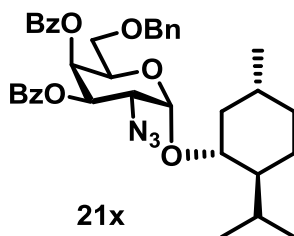

The glycosylation reaction was carried out according to **General Experimental Procedures** at 25 °C for 44 h, using acceptor **20x** (28.0 mg, 0.18 mmol) with **17a** (181 mg, 0.27 mmol), DCM 1.8 mL, Ph<sub>3</sub>P=O (448.0 mg, 1.61 mmol) and TMSI (38  $\mu$ L, 0.27 mmol). The product was purified by silica gel column chromatography (PE-EA, 20:1-10:1) to afford **21x** (105.4 mg, 92%,  $\alpha/\beta >20:1$ ) as a white solid.  $[\alpha]_D^{23} = +192.2$  (c 0.11, CHCl<sub>3</sub>). <sup>1</sup>H NMR (400 MHz, CDCl<sub>3</sub>)  $\delta$  7.97 (d,  $J = 7.7$  Hz, 2H, Ar), 7.89 (d,  $J = 7.8$  Hz, 2H, Ar), 7.59 (t,  $J = 7.5$  Hz, 1H, Ar), 7.52 – 7.40 (m, 3H, Ar), 7.32 (t,  $J = 7.7$  Hz, 2H, Ar), 7.26 – 7.14 (m, 5H, Ar), 5.92 (d,  $J = 3.3$  Hz, 1H, H-4), 5.71 (dd,  $J = 11.2, 3.3$  Hz, 1H, H-3), 5.21 (d,  $J = 3.6$  Hz, 1H, H-1), 4.57 (t,  $J = 6.3$  Hz, 1H, H-5), 4.52 (d,  $J = 12.0$  Hz, 1H, CH<sub>2</sub>-Bn), 4.40 (d,  $J = 12.0$  Hz, 1H, CH<sub>2</sub>-Bn), 3.97 (dd,  $J = 11.1, 3.6$  Hz, 1H, H-2), 3.65 – 3.53 (m, 2H, H-6), 3.51 – 3.43 (m, 1H), 2.42 – 2.32 (m, 1H), 2.23 (d,  $J = 12.3$  Hz, 1H), 1.70 – 1.59 (m, 2H), 1.37 (t,  $J = 11.3$  Hz, 2H), 1.14 (q,  $J = 11.8$  Hz, 1H), 1.05 – 0.91 (m, 4H, CH<sub>3</sub>), 0.87 (d,  $J = 6.5$  Hz, 3H, CH<sub>3</sub>), 0.81 (d,  $J = 7.0$  Hz, 3H, CH<sub>3</sub>). <sup>13</sup>C NMR (101 MHz, CDCl<sub>3</sub>)  $\delta$  165.51, 165.45, 137.7, 133.4, 133.3, 129.89, 129.87, 129.7, 129.5, 128.6, 128.4, 127.7, 127.6, 99.7 (C-1),

81.8, 73.6, 69.6, 69.2, 68.6, 68.4, 59.3, 48.8, 42.8, 34.3, 31.9, 25.0, 22.9, 22.3, 21.4, 16.0. HRMS (ESI) calcd for C<sub>37</sub>H<sub>47</sub>N<sub>4</sub>O<sub>7</sub> [M+NH<sub>4</sub>]<sup>+</sup> 659.3439, found 659.3446.

**Tricyclo[3.3.1.1<sup>3,7</sup>]dec-1-yl 2-azido-3,4-di-*O*-benzoyl-6-*O*-benzyl-2-deoxy- $\alpha$ -D-galactopyranoside (21y)**

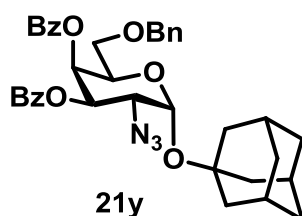

The glycosylation reaction was carried out according to **General Experimental Procedures** at 25 °C for 5.5 d, using acceptor **20y** (35.3 mg, 0.23 mmol) with **17a** (234.7 mg, 0.35 mmol), DCM 2.3 mL, Ph<sub>3</sub>P=O (580.8 mg, 2.09 mmol) and TMSI (50  $\mu$ L, 0.35 mmol). The product was purified by silica gel column chromatography (PE-EA, 20:1) to afford **21y** (136.9 mg, 93%,  $\alpha/\beta >20:1$ ) as a white solid.  $[\alpha]_D^{23} = +183.9$  (c 0.33, CHCl<sub>3</sub>). <sup>1</sup>H NMR (400 MHz, CDCl<sub>3</sub>)  $\delta$  7.98 (d,  $J = 7.7$  Hz, 2H, Ar), 7.89 (d,  $J = 7.7$  Hz, 2H, Ar), 7.58 (t,  $J = 7.4$  Hz, 1H, Ar), 7.51 – 7.39 (m, 3H, Ar), 7.31 (t,  $J = 7.7$  Hz, 2H, Ar), 7.25 – 7.13 (m, 5H, Ar), 5.94 (d,  $J = 3.2$  Hz, 1H, H-4), 5.83 (dd,  $J = 11.2, 3.2$  Hz, 1H, H-3), 5.57 (d,  $J = 3.5$  Hz, 1H, H-1), 4.63 (t,  $J = 6.5$  Hz, 1H, H-5), 4.51 (d,  $J = 11.8$  Hz, 1H, CH<sub>2</sub>-Bn), 4.40 (d,  $J = 11.8$  Hz, 1H, CH<sub>2</sub>-Bn), 3.72 (dd,  $J = 11.2, 3.5$  Hz, 1H, H-2), 3.59 (d,  $J = 6.5$  Hz, 2H, H-6), 2.17 (t,  $J = 3.5$  Hz, 3H), 1.93 (q,  $J = 11.6$  Hz, 6H), 1.65 (d,  $J = 3.4$  Hz, 6H). <sup>13</sup>C NMR (101 MHz, CDCl<sub>3</sub>)  $\delta$  165.49, 165.45, 137.7, 133.4, 133.2, 129.9, 129.8, 129.6, 129.4, 128.6, 128.3, 127.61, 127.56, 91.9 (C-1), 76.1, 73.5, 69.2, 68.9, 68.4, 67.8, 58.1, 42.4, 36.2, 30.7. HRMS (ESI) calcd for C<sub>37</sub>H<sub>43</sub>N<sub>4</sub>O<sub>7</sub> [M+NH<sub>4</sub>]<sup>+</sup> 655.3126, found 655.3128.

**17-*O*-(2-azido-3,4-di-*O*-benzoyl-6-*O*-benzyl-2-deoxy- $\alpha$ -D-galactopyranosyl) estradiol benzoate (21z)**



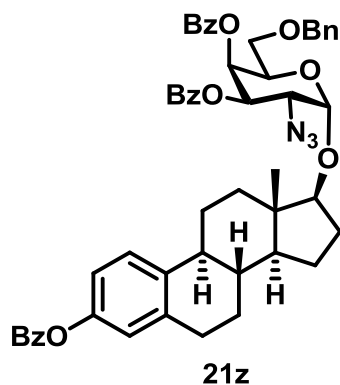

The glycosylation reaction was carried out according to **General Experimental Procedures** at 25 °C for 8 d, using acceptor **20z** (53.1 mg, 0.14 mmol) with **17a** (142.7 mg, 0.21 mmol), DCM 1.4 mL,  $\text{Ph}_3\text{P}=\text{O}$  (352.2 mg, 1.27 mmol) and TMSI (30  $\mu\text{L}$ , 0.21 mmol). The product was purified by silica gel column chromatography (PE-EA, 7:1) to afford **21z** (121.1 mg, 99%,  $\alpha/\beta >20:1$ ) as a white solid.  $[\alpha]_{\text{D}}^{25} = +161.8$  (c 0.10,  $\text{CHCl}_3$ ).  $^1\text{H}$  NMR (400 MHz,  $\text{CDCl}_3$ )  $\delta$  8.20 (d,  $J = 7.7$  Hz, 2H, Ar), 8.00 (d,  $J = 7.8$  Hz, 2H, Ar), 7.89 (d,  $J = 7.8$  Hz, 2H, Ar), 7.60 (q,  $J = 6.9$  Hz, 2H, Ar), 7.53 – 7.41 (m, 5H, Ar), 7.33 (q,  $J = 7.8$  Hz, 3H, Ar), 7.28 – 7.14 (m, 5H, Ar), 7.00 (dd,  $J = 8.5, 2.4$  Hz, 1H, Ar), 6.94 (d,  $J = 2.5$  Hz, 1H, Ar), 5.97 (d,  $J = 3.2$  Hz, 1H, H-4), 5.79 (dd,  $J = 11.1, 3.1$  Hz, 1H, H-3), 5.21 (d,  $J = 3.4$  Hz, 1H, H-1), 4.59 – 4.50 (m, 2H,  $\text{CH}_2\text{-Bn}$ , H-5), 4.44 (d,  $J = 11.8$  Hz, 1H,  $\text{CH}_2\text{-Bn}$ ), 3.89 – 3.75 (m, 2H, H-2), 3.63 (q,  $J = 9.8, 8.3$  Hz, 2H, H-6), 2.94 – 2.83 (m, 2H), 2.35 – 2.07 (m, 4H), 1.95 – 1.85 (m, 1H), 1.80 – 1.66 (m, 2H), 1.63 – 1.43 (m, 3H), 1.43 – 1.32 (m, 2H), 1.25 – 1.17 (m, 1H), 0.93 (s, 3H).  $^{13}\text{C}$  NMR (101 MHz,  $\text{CDCl}_3$ )  $\delta$  165.49, 165.45, 148.8, 138.3, 138.0, 137.7, 133.53, 133.47, 133.3, 130.2, 129.9, 129.84, 129.77, 129.5, 129.3, 128.61, 128.58, 128.5, 128.4, 127.9, 127.8, 127.7, 127.6, 126.6, 121.7, 118.8, 97.3 (C-1), 86.6, 73.5, 69.2, 68.7, 68.5, 68.4, 58.3, 50.1, 44.2, 43.0, 38.2, 37.3, 29.6, 27.1, 26.9, 26.1, 23.2, 12.2. HRMS (ESI) calcd for  $\text{C}_{52}\text{H}_{55}\text{N}_4\text{O}_9$   $[\text{M}+\text{NH}_4]^+$  879.3964, found 879.3972.

**(3 $\beta$ )-Cholest-5-en-3-yl 2-azido-3,4-di-O-benzoyl-6-O-benzyl-2-deoxy- $\alpha$ -D-galactopyranoside (21aa)**

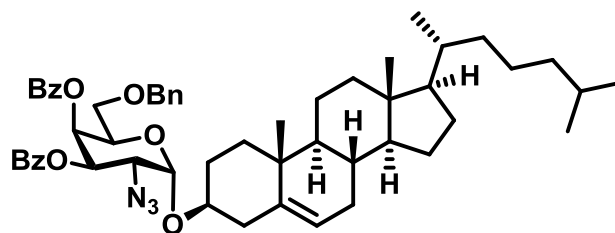

**21aa**

The glycosylation reaction was carried out according to **General Experimental Procedures** at 25 °C for 47 h, using acceptor **20aa** (64.6 mg, 0.17 mmol) with **17a** (169.1mg, 0.25 mmol), DCM 1.7 mL, Ph<sub>3</sub>P=O (418.5 mg, 1.50 mmol) and TMSI (36 μL, 0.25 mmol). The product was purified by silica gel column chromatography (PE-EA, 20:1) to afford **21aa** (136.7 mg, 94%, α/β >20:1) as a yellow solid.  $[\alpha]_D^{21} = +143.3$  (c 0.15, CHCl<sub>3</sub>). <sup>1</sup>H NMR (400 MHz, CDCl<sub>3</sub>) δ 7.98 (d, *J* = 7.7 Hz, 2H, Ar), 7.88 (d, *J* = 7.8 Hz, 2H, Ar), 7.60 (t, *J* = 7.5 Hz, 1H, Ar), 7.53 – 7.41 (m, 3H, Ar), 7.32 (t, *J* = 7.7 Hz, 2H, Ar), 7.26 – 7.15 (m, 5H, Ar), 5.92 (d, *J* = 3.2 Hz, 1H, H-4), 5.78 (dd, *J* = 11.1, 3.3 Hz, 1H, H-3), 5.34 – 5.28 (m, 2H, H-1), 4.56 – 4.48 (m, 2H, H-5, CH<sub>2</sub>-Bn), 4.41 (d, *J* = 11.9 Hz, 1H, CH<sub>2</sub>-Bn), 3.79 (dd, *J* = 11.1, 3.5 Hz, 1H, H-2), 3.66 – 3.54 (m, 3H, H-6), 2.46 (d, *J* = 8.1 Hz, 2H), 2.06 – 1.93 (m, 3H), 1.92 – 1.79 (m, 2H), 1.70 – 1.44 (m, 8H), 1.42 – 1.28 (m, 4H), 1.21 – 1.08 (m, 5H), 1.08 – 0.98 (m, 6H), 0.92 (d, *J* = 6.4 Hz, 4H), 0.87 (d, *J* = 6.6 Hz, 6H), 0.69 (s, 3H). <sup>13</sup>C NMR (101 MHz, CDCl<sub>3</sub>) δ 165.5, 140.5, 137.7, 133.5, 133.3, 130.0, 129.9, 129.7, 129.5, 128.7, 128.43, 128.40, 127.8, 127.7, 122.4, 97.4 (C-1), 79.5, 73.6, 69.3, 69.1, 68.52, 68.47, 58.3, 57.0, 56.4, 50.4, 42.5, 40.2, 40.0, 39.7, 37.2, 36.9, 36.4, 35.9, 32.13, 32.07, 28.4, 28.2, 24.5, 24.0, 23.0, 22.7, 21.2, 19.5, 18.9, 12.0. HRMS (ESI) calcd for C<sub>54</sub>H<sub>73</sub>N<sub>4</sub>O<sub>7</sub> [M+NH<sub>4</sub>]<sup>+</sup> 889.5474, found 889.5470.

**3β-O-(2-azido-3,4-di-O-benzoyl-6-O-benzyl-2-deoxy-α-D-galactopyranosyl) dehydroepiandrosterone (21ab)**

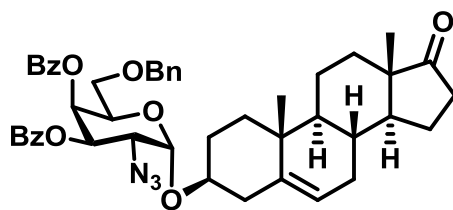

**21ab**

The glycosylation reaction was carried out according to **General Experimental Procedures** at 25 °C for 3 d, using acceptor **20ab** (44.3 mg, 0.15 mmol) with **17a** (155.4mg, 0.23 mmol), DCM 1.5 mL, Ph<sub>3</sub>P=O (384.7 mg, 1.38 mmol) and TMSI (33 μL, 0.23 mmol). The product was purified by silica gel column chromatography (PE-EA, 4:1) to afford **21ab** (111.7 mg, 94%, α/β >20:1) as a white solid.  $[\alpha]_D^{22} = +186.7$  (c 0.27, CHCl<sub>3</sub>). <sup>1</sup>H NMR (400 MHz, CDCl<sub>3</sub>) δ 7.98 (d, *J* = 7.7 Hz, 2H, Ar), 7.88 (d, *J* = 7.7 Hz, 2H, Ar), 7.60 (t, *J* = 7.4 Hz, 1H, Ar), 7.53 – 7.42 (m, 3H, Ar), 7.32 (t, *J* = 7.7 Hz, 2H, Ar), 7.28 – 7.15 (m, 5H, Ar), 5.92 (d, *J* = 3.3 Hz, 1H, H-4), 5.78 (dd, *J* = 11.1, 3.3 Hz, 1H, H-3), 5.32 (m, 2H, H-1), 4.57 – 4.48 (m, 2H, H-5, CH<sub>2</sub>-Bn), 4.42 (d, *J* = 11.8 Hz, 1H, CH<sub>2</sub>-Bn), 3.80 (dd, *J* = 11.1, 3.5 Hz, 1H, H-2), 3.67 – 3.55 (m, 3H, H-6), 2.54 – 2.41 (m, 3H), 2.16 – 1.99 (m, 3H), 1.98 – 1.82 (m, 3H), 1.73 – 1.61 (m, 4H), 1.58 – 1.44 (m, 2H), 1.35 – 1.28 (m, 2H), 1.14 – 0.97 (m, 5H), 0.90 (s, 3H). <sup>13</sup>C NMR (101 MHz, CDCl<sub>3</sub>) δ 221.0, 165.51, 165.48, 140.7, 137.7, 133.5, 133.3, 129.93, 129.89, 129.6, 129.4, 128.7, 128.5, 128.4, 127.75, 127.72, 121.6, 97.3 (C-1), 79.1, 73.6, 69.2, 69.1, 68.55, 68.52, 58.2, 51.9, 50.4, 47.7, 40.1, 37.1, 37.0, 36.0, 31.64, 31.60, 31.0, 28.1, 22.0, 20.5, 19.5, 13.7. HRMS (ESI) calcd for C<sub>46</sub>H<sub>55</sub>N<sub>4</sub>O<sub>8</sub> [M+NH<sub>4</sub>]<sup>+</sup> 791.4014, found 791.4013.

**5-β-cholan-24-oic acid benzyl ester-3-α-yl 2-azido-3,4-di-O-benzoyl-6-O-benzyl-2-deoxy-α-D-galactopyranoside (21ac)**

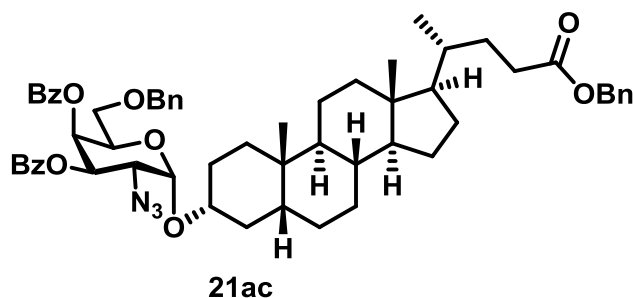

The glycosylation reaction was carried out according to **General Experimental Procedures** at 25 °C for 4 d, using acceptor **20ac** (69 mg, 0.15 mmol) with **17a** (149.6mg, 0.22 mmol), DCM 1.5 mL, Ph<sub>3</sub>P=O (370.2 mg, 1.33 mmol) and TMSI (32 μL, 0.22 mmol). The product was purified by silica gel column chromatography (PE-EA, 20:1) to afford **21ac** (121.4 mg, 86%, α/β >20:1) as a white solid.  $[\alpha]_D^{21} = +141.4$  (c 0.28, CHCl<sub>3</sub>). <sup>1</sup>H NMR (400 MHz, CDCl<sub>3</sub>) δ 7.98 (d, *J* = 7.7 Hz, 2H, Ar), 7.88 (d, *J* = 7.7 Hz, 2H, Ar), 7.58 (t, *J* = 7.5 Hz, 1H, Ar), 7.51 – 7.40 (m, 3H, Ar), 7.37 – 7.28 (m, 7H, Ar), 7.23 – 7.13 (m, 5H, Ar), 5.93 (d, *J* = 3.3 Hz, 1H, H-4), 5.79 (dd, *J* = 11.0, 3.3 Hz, 1H, H-3), 5.30 (d, *J* = 3.5 Hz, 1H, H-1), 5.11 (d, *J* = 2.9 Hz, 2H, CH<sub>2</sub>-Bn), 4.57 – 4.46 (m, 2H, CH<sub>2</sub>-Bn, H-5), 4.40 (d, *J* = 11.8 Hz, 1H, CH<sub>2</sub>-Bn), 3.84 (dd, *J* = 11.1, 3.5 Hz, 1H, H-2), 3.74 – 3.65 (m, 1H), 3.59 (q, *J* = 9.6, 7.9 Hz, 2H, H-6), 2.45 – 2.35 (m, 1H), 2.33 – 2.21 (m, 1H), 1.98 – 1.90 (m, 2H), 1.89 – 1.76 (m, 4H), 1.66 (d, *J* = 12.5 Hz, 1H), 1.61 – 1.49 (m, 2H), 1.48 – 1.32 (m, 8H), 1.30 – 1.18 (m, 4H), 1.11 (q, *J* = 10.4, 9.6 Hz, 3H), 1.04 – 0.96 (m, 2H), 0.92 (d, *J* = 6.6 Hz, 6H), 0.63 (s, 3H). <sup>13</sup>C NMR (101 MHz, CDCl<sub>3</sub>) δ 174.1, 165.41, 165.39, 137.6, 136.2, 133.4, 133.2, 129.84, 129.81, 129.5, 129.3, 128.6, 128.3, 128.25, 128.18, 127.6, 127.5, 97.2 (C-1), 79.5, 73.5, 69.2, 69.1, 68.4, 68.3, 66.1, 58.3, 56.3, 55.9, 42.8, 42.2, 40.4, 40.1, 35.9, 35.4, 35.3, 34.7, 32.7, 31.3, 31.0, 28.5, 28.2, 27.3, 26.4, 24.2, 23.5, 20.9, 18.3, 12.1. HRMS (ESI) calcd for C<sub>58</sub>H<sub>73</sub>N<sub>4</sub>O<sub>9</sub> [M+NH<sub>4</sub>]<sup>+</sup> 969.5372, found 969.5373.

### Preparation of the common intermediate 16

#### Phenyl 2-azido-4-*O*-benzoyl-6-*O*-tert-butylidiphenylsilyl-2-deoxy-3-*O*-levulinoyl-1-seleno-α-*D*-galactopyranoside (S31)

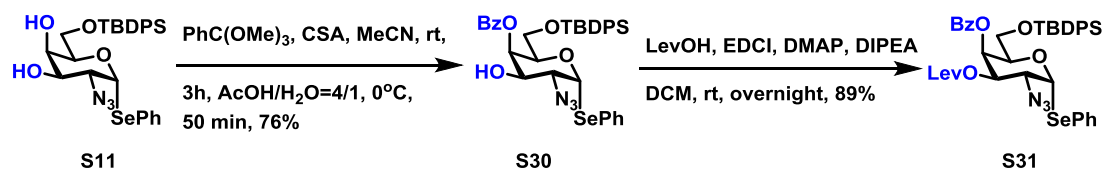

Compound **S11** (6.80 g, 11.67 mmol) was stirred with trimethyl orthobenzoate (17.3 mL, 93.38 mmol) in acetonitrile (58 mL) at room temperature for some time. Then 10-camphorsulfonic acid (CSA) (813.5 mg, 3.50 mmol) was added, and the reaction mixture was stirred at room temperature for 3 h. The solvent was then removed under reduced pressure, and the temperature was brought down to 0 °C, 80% aq acetic acid (58 mL) was then added, and the reaction was stirred at 0 °C for 50 min. The reaction mixture was quenched carefully with saturated NaHCO<sub>3</sub>. The product was extracted with dichloromethane (250 mL × 3), and the combined organic layer was washed with distilled water (300 mL). The organic layer was dried over anhydrous sodium sulfate, and the solvent was removed under reduced pressure. The residue was purified by column chromatography on silica gel (petroleum ether-EtOAc, 8:1) to afford the intermediate **S30** (6.07 g, 76%). To a solution of the above intermediate (6.07 g, 8.84 mmol) and levulinic acid (1.54 g, 13.26 mmol) in anhydrous DCM (88 mL) was added DMAP (1.08 g, 8.84 mmol), EDCI (3.05 g, 15.91 mmol) and DIPEA (4.4 mL, 26.52 mmol). The resulting mixture was stirred overnight at room temperature. Upon completion, the solvent was evaporated under vacuum. The residue was purified by column chromatography on silica gel (petroleum ether-EtOAc, 5:1) to afford **S31** (6.18 g, 89%) as a white solid.  $[\alpha]_{\text{D}}^{23} = +273.2$  (c 0.25, CHCl<sub>3</sub>). <sup>1</sup>H NMR (400 MHz, CDCl<sub>3</sub>) δ 8.05 – 8.00 (m, 2H, Ar), 7.65 – 7.57 (m, 3H, Ar), 7.54 – 7.50 (m, 2H, Ar), 7.50 – 7.34 (m, 7H, Ar), 7.24 (dd, *J* = 8.5, 6.5 Hz, 2H, Ar), 7.16 (dd, *J* = 8.2, 6.7 Hz, 2H, Ar), 7.06 (t, *J* = 7.5 Hz, 2H, Ar), 5.98 (d, *J* = 5.4 Hz, 1H, H-1), 5.95 – 5.92 (m, 1H, H-4), 5.29 (dd, *J* = 10.8, 3.2 Hz, 1H, H-3), 4.66 – 4.58 (m, 1H, H-5), 4.31 (dd, *J* = 10.7, 5.4 Hz, 1H, H-2), 3.65 (dd, *J* = 9.9, 8.5 Hz, 1H, H-6), 3.48 (dd, *J* = 9.9, 5.8 Hz, 1H, H-6), 2.92 – 2.82 (m, 1H, CH<sub>2</sub>-Lev), 2.77 – 2.59 (m, 2H, CH<sub>2</sub>-Lev), 2.56 – 2.47 (m, 1H, CH<sub>2</sub>-Lev), 2.16 (s, 3H, CH<sub>3</sub>-Lev), 0.97 (s, 9H, CH<sub>3</sub>-*t*-Bu). <sup>13</sup>C NMR (101 MHz, CDCl<sub>3</sub>) δ 206.3, 171.7, 165.5, 135.6, 135.4,

135.2, 133.6, 132.8, 132.4, 129.93, 129.90, 129.7, 129.5, 129.2, 128.7, 128.2, 127.9, 127.7, 84.4 (C-1), 72.0, 71.3, 67.5, 60.8, 59.4, 38.0, 29.9, 28.0, 26.7, 19.1. HRMS (ESI) calcd for C<sub>40</sub>H<sub>43</sub>N<sub>3</sub>O<sub>7</sub>SiSeNa [M+Na]<sup>+</sup> 802.1987, found 802.1986.

**L-Serine**                      ***N*-(benzyloxycarbonyl)-*O*-(2-azido-4-*O*-benzoyl-6-*O*-tert-butyl-diphenylsilyl-2-deoxy-3-*O*-levulinoyl- $\alpha$ -D-galactopyranosyl)-benzyl ester (16)**

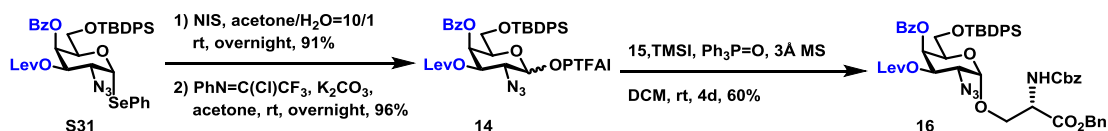

Compound **S31** (5.28 g, 6.72 mmol) was dissolved in acetone/H<sub>2</sub>O (60 mL/6 mL), and NIS (2.27g, 10.08 mmol) was added. The resulting mixture was stirred overnight. The solution was diluted with EtOAc, washed with saturated Na<sub>2</sub>S<sub>2</sub>O<sub>3</sub>, water and brine, dried over anhydrous Na<sub>2</sub>SO<sub>4</sub>, filtered and concentrated *in vacuo*. The residue was purified by flash column chromatography (petroleum ether-EtOAc, 4:1) to give the intermediate (3.93 g, 91%). The above intermediate (2.25 mg, 3.48 mmol) and 2,2,2-trifluoro-*N*-phenylacetimidoyl chloride (794.8 mg, 3.83 mmol) was dissolved in acetone (34 mL), and K<sub>2</sub>CO<sub>3</sub> (721.4 mg, 5.22 mmol) was added. The reaction was stirred overnight at room temperature, then filtered and concentrated *in vacuo*. The residue was purified by flash column chromatography (petroleum ether-EtOAc, 10:1 to 4:1, containing 1% Et<sub>3</sub>N) to give **14** (2.73 g, 96%) (Compound **14** was used directly without further structural characterization). PTFAI donor **14** (2.51 g, 3.07 mmol) was co-evaporated with anhydrous toluene for three times. Then PTFAI donor with Ph<sub>3</sub>P=O (5.13 g, 18.44 mmol) were dissolved in new distilled DCM (30 mL) and stirred over fresh-dried 3Å molecular sieves under argon at room temperature for 15 min. TMSI (0.44 mL, 0.35 mmol) was added dropwise subsequently. After the mixture was stirred for 1 h, acceptor *N*-Benzyloxycarbonyl-L-serine Benzyl Ester **15** (3.52 g, 4.61 mmol) was added. The reaction was stirred at room temperature for 5 d. Upon completion, the solution was diluted with EtOAc and the reaction was quenched with saturated Na<sub>2</sub>S<sub>2</sub>O<sub>3</sub>. The organic phase was washed with water and brine, dried over anhydrous Na<sub>2</sub>SO<sub>4</sub>, filtered and concentrated *in*

*vacuo*. The products were purified by flash column chromatography (PE-EA=4:1) to afford **16** (1.77 g, 60%,  $\alpha/\beta >20:1$ ) as a yellow solid.  $[\alpha]_D^{25} = +102.7$  (c 0.15,  $\text{CHCl}_3$ ).  $^1\text{H NMR}$  (400 MHz,  $\text{CDCl}_3$ )  $\delta$  7.98 (d,  $J = 7.7$  Hz, 2H, Ar), 7.62 (d,  $J = 6.9$  Hz, 3H, Ar), 7.50 – 7.41 (m, 4H, Ar), 7.39 – 7.21 (m, 14H, Ar), 7.07 (t,  $J = 7.4$  Hz, 2H, Ar), 5.81 (d,  $J = 3.1$  Hz, 1H, H-4), 5.78 (d,  $J = 8.9$  Hz, 1H, NH-Ser), 5.38 (dd,  $J = 11.2, 3.2$  Hz, 1H, H-3), 5.24 (q,  $J = 12.2$  Hz, 2H), 5.07 (s, 2H), 4.87 (d,  $J = 3.6$  Hz, 1H, H-1), 4.62 – 4.56 (m, 1H, CH-Ser), 4.15 – 4.06 (m, 2H, H-5,  $\text{CH}_2$ -Ser), 3.94 (dd,  $J = 11.0, 3.1$  Hz, 1H,  $\text{CH}_2$ -Ser), 3.73 – 3.55 (m, 3H, H-2, H-6), 2.88 – 2.78 (m, 1H,  $\text{CH}_2$ -Lev), 2.75 – 2.55 (m, 2H,  $\text{CH}_2$ -Lev), 2.53 – 2.43 (m, 1H,  $\text{CH}_2$ -Lev), 2.14 (s, 3H,  $\text{CH}_3$ -Lev), 0.96 (s, 9H,  $\text{CH}_3$ -*t*-Bu).  $^{13}\text{C NMR}$  (101 MHz,  $\text{CDCl}_3$ )  $\delta$  206.3, 171.8, 169.7, 165.5, 156.2, 136.2, 135.6, 135.5, 135.2, 133.5, 132.8, 132.6, 129.9, 129.8, 129.6, 128.8, 128.71, 128.69, 128.6, 128.3, 127.9, 127.7, 99.5 (C-1), 69.8, 68.7, 67.89, 67.86, 67.3, 61.3, 58.0, 54.6, 38.0, 29.8, 28.0, 26.7, 19.1. HRMS (ESI) calcd for  $\text{C}_{52}\text{H}_{56}\text{N}_4\text{O}_{12}\text{SiNa}$   $[\text{M}+\text{Na}]^+$  979.3562, found 979.3563.

## Synthesis of $\text{T}_\text{N}$ antigen 1 from **16**

### *O*-[2-(Acetylamino)-2-deoxy- $\alpha$ -D-galactopyranosyl]-L-serine (**1**)

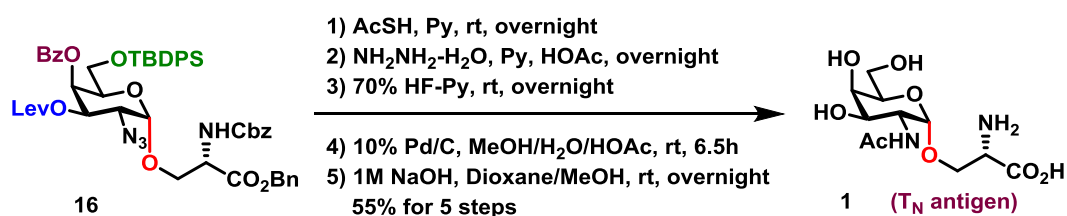

To a solution of compound **16** (228.8 mg, 0.24 mmol) in pyridine (4.8 mL) was added Thioacetic acid (AcSH) (3.6 mL, 48 mmol). The reaction mixture was stirred overnight. Then the reaction mixture was concentrated *in vacuo*. Purification by flash chromatography (petroleum ether-EtOAc, 2:1) afforded intermediate (213.4 mg, 92%). The above intermediate (213.4 mg, 0.22 mmol) was dissolved in Py/HOAc (1.2 mL/0.8 mL), subsequently 80%  $\text{NH}_2\text{NH}_2\cdot\text{H}_2\text{O}$  (0.031 mL, 0.65 mmol) was added. After stirring overnight at room temperature, the reaction mixture was diluted with ethyl acetate, washed with 3M HCl, saturated  $\text{NaHCO}_3$  solution and brine. The

organic layer was filtered and concentrated. The residue was purified by flash column chromatography (petroleum ether-ethyl acetate, 1:1.3) to give the intermediate (171.3 mg, 89%). To a solution of above intermediate (171 mg, 0.20 mmol) in anhydrous THF (2 mL) was added HF/pyridine (70%, 18 mL, 1.95 mmol) dropwise. After stirring overnight at room temperature, the reaction mixture was quenched with Et<sub>3</sub>N (1mL), diluted with ethyl acetate and washed with saturated NaHCO<sub>3</sub> solution and brine. The organic layer was concentrated under vacuum. The residue was purified by column chromatography on silica gel (DCM/MeOH, 30:1) to afford the intermediate (114.5 mg, 92%). A mixture of the above intermediate (78 mg, 0.12 mmol) and Pd/C (260.8 mg, 10%) in MeOH/H<sub>2</sub>O/HOAc (6 mL/0.6 mL/0.06 mL) was stirred under an atmosphere of H<sub>2</sub> at room temperature for 6.5 h, after which the reaction mixture was filtered and concentrated *in vacuo* to afford the crude product (50.5 mg, 100%). The mixture solution of above crude product (50.5 mg, 12 mmol) in 1M NaOH/Dioxane/MeOH (1.2 mL/0.9 mL/0.9 mL) was stirred overnight at room temperature. After the reaction was completed, the reaction was neutralized to pH = 7 by acetic acid, then filtered and concentrated. The residue was purified by column chromatography on Sephadex TM LH-20 (MeOH-H<sub>2</sub>O =1:1) to afford **1** (27.6 mg, 73%) as a white solid.  $[\alpha]_D^{22} = +178.5$  (c 0.16, H<sub>2</sub>O). <sup>1</sup>H NMR (600 MHz, D<sub>2</sub>O)  $\delta$  4.92 (d,  $J = 3.8$  Hz, 1H, H-1), 4.20 (dd,  $J = 11.1, 3.8$  Hz, 1H, H-2), 4.11 (dd,  $J = 11.0, 2.9$  Hz, 1H), 4.01 – 3.87 (m, 5H, H-3), 3.82 – 3.72 (m, 2H), 2.05 (s, 3H). <sup>13</sup>C NMR (101 MHz, D<sub>2</sub>O)  $\delta$  174.3, 171.3, 97.6 (C-1), 71.0, 68.1, 67.1, 66.3, 60.9, 54.2, 49.3, 21.7. HRMS (ESI) calcd for C<sub>11</sub>H<sub>19</sub>N<sub>2</sub>O<sub>8</sub> [M-H]<sup>-</sup> 307.1147, found 307.1149.

### Synthesis of T<sub>N</sub> antigen **1** from S32

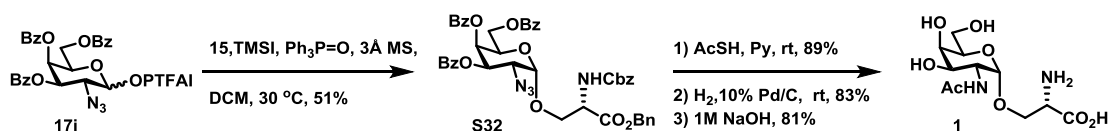

The glycosylation reaction was carried out according to **General Experimental Procedures** at 30°C for 5.5 d, using acceptor **15** (412.3 mg, 1.25 mmol) with **17j** (574.9 mg, 0.83 mmol), DCM 8.3 mL, Ph<sub>3</sub>P=O (1.39 g, 5.01 mmol) and TMSI (0.12



mL, 0.83 mmol). The product was purified by silica gel column chromatography (PE-EA, 4:1) to afford **S32** (353.5 mg, 51%,  $\alpha/\beta >20:1$ ) as a yellow solid. To a solution of compound **S32** (322.6 mg, 0.39 mmol) in pyridine (7.6 mL) was added AcSH (5.8 mL, 77.84 mmol). The reaction mixture was stirred overnight at room temperature. Then the reaction mixture was concentrated in vacuo. The residue was purified by flash chromatography (PE/EA, 1.2:1-1:1) to afford intermediate (293.1 mg, 89%). A mixture of the above intermediate (140 mg, 0.17 mmol) and Pd/C (352.7 mg, 10%) in MeOH/H<sub>2</sub>O/HOAc (6 mL/0.6 mL/0.06 mL) was stirred under an atmosphere of H<sub>2</sub> at room temperature for 6 h, after which the reaction mixture was filtered and concentrated *in vacuo* to afford the residue (84.4 mg, 83%). To a solution of above residue (55 mg, 0.07 mmol) in dioxane/MeOH (1.5 mL/1.5 mL) was added 1.5 mL 1M NaOH aq. The reaction was stirred overnight at room temperature. After the reaction was completed, the reaction was neutralized to pH = 7 by acetic acid, then filtered and concentrated. The residue was purified by column chromatography on Sephadex TM LH-20 (MeOH-H<sub>2</sub>O = 1:1) to afford **1** (34.1 mg, 81%) as a white solid.

### Preparation of donors 32-34 and acceptors 39 and S33

**L-Serine**      *N*-(benzyloxycarbonyl)-*O*-(2-azido-4-*O*-benzoyl-6-*O*-tert-butyl-diphenylsilyl-2-deoxy- $\alpha$ -D-galactopyranosyl)-benzyl ester (**39**)

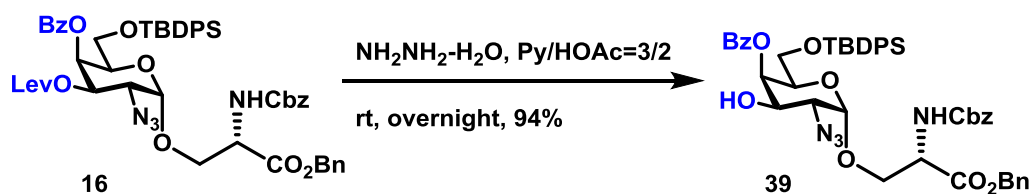

Compound **16** (200 mg, 0.21 mmol) was dissolved in anhydrous pyridine/AcOH (1.2 mL/0.8 mL), then NH<sub>2</sub>NH<sub>2</sub>·H<sub>2</sub>O (0.03 mL, 0.63 mmol) was added at room temperature. The reaction was stirred until TLC-analysis indicated full consumption of the starting material. Then the reaction was quenched with acetone and the mixture was concentrated under vacuum. The products were purified by flash column chromatography (PE:EA=5:1) to afford **39** (168.8 mg, 94%) as a white solid.  $[\alpha]_D^{24} = +63.0$  (c 0.20, CHCl<sub>3</sub>). <sup>1</sup>H NMR (400 MHz, CDCl<sub>3</sub>) 7.90 (d, *J* = 7.7 Hz, 2H, Ar), 7.55

(d,  $J = 7.0$  Hz, 2H, Ar), 7.50 (t,  $J = 7.5$  Hz, 1H, Ar), 7.36 (t,  $J = 8.0$  Hz, 4H, Ar), 7.27 (m, 9H, Ar), 7.17 (m, 5H, Ar), 6.99 (t,  $J = 7.4$  Hz, 2H, Ar), 5.73 (d,  $J = 8.6$  Hz, 1H, NH-Ser), 5.61 – 5.56 (m, 1H, H-4), 5.19 (d,  $J = 12.1$  Hz, 1H), 5.10 (d,  $J = 12.0$  Hz, 1H), 4.95 (t,  $J = 10.0$  Hz, 2H), 4.73 (d,  $J = 3.6$  Hz, 1H, H-1), 4.55 – 4.47 (m, 1H, CH-Ser), 4.09 – 3.92 (m, 3H, H-3, H-5, CH<sub>2</sub>-Ser), 3.87 – 3.77 (m, 1H, CH<sub>2</sub>-Ser), 3.68 – 3.51 (m, 2H, H-6), 3.36 (dd,  $J = 10.7, 3.4$  Hz, 1H, H-2), 2.70 (s, 1H), 0.89 (s, 9H, CH<sub>3</sub>-*t*-Bu). <sup>13</sup>C NMR (101 MHz, CDCl<sub>3</sub>)  $\delta$  169.9, 167.0, 156.1, 136.1, 135.6, 135.4, 135.2, 133.5, 132.8, 132.6, 130.0, 129.9, 129.8, 129.5, 128.78, 128.76, 128.64, 128.59, 128.3, 127.9, 127.7, 99.6 (C-1), 70.7, 69.9, 67.8, 67.5, 67.3, 61.3, 60.4, 54.6, 26.7, 19.1. HRMS (ESI) calcd for C<sub>47</sub>H<sub>50</sub>N<sub>4</sub>O<sub>10</sub>SiNa [M+Na]<sup>+</sup> 881.3194, found 881.3194.

**L-Serine *N*-(benzyloxycarbonyl)-*O*-(2-azido-4-*O*-benzoyl-2-deoxy-3-*O*-levulinoyl)- $\alpha$ -D-galactopyranosyl)-benzyl ester (S33)**

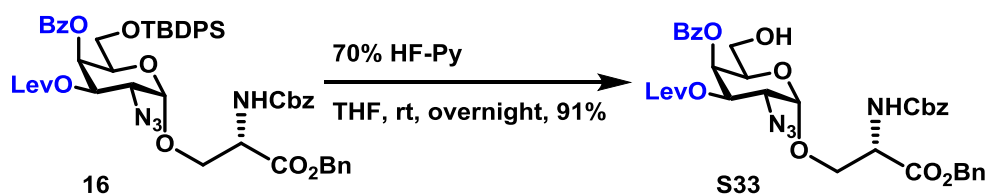

Compound **16** (430 mg, 0.45 mmol) was then dissolved in anhydrous THF (1.5 mL), and HF/pyridine (70%, 0.4 mL, 4.49 mmol) was added dropwise. The resulting mixture was stirred overnight at room temperature, the reaction mixture was then quenched with Et<sub>3</sub>N, diluted with ethyl acetate and washed with saturated NaHCO<sub>3</sub> solution and brine. The organic layer was concentrated under vacuum. The residue was purified by column chromatography on silica gel (PE:EA = 2:1) to afford **S33** (293.9 mg, 91%,) as a white solid.  $[\alpha]_D^{24} = +191.0$  (c 0.21, CHCl<sub>3</sub>). <sup>1</sup>H NMR (400 MHz, CDCl<sub>3</sub>)  $\delta$  8.03 (d,  $J = 7.7$  Hz, 2H, Ar), 7.62 (t,  $J = 7.5$  Hz, 1H, Ar), 7.47 (t,  $J = 7.6$  Hz, 2H, Ar), 7.42 – 7.29 (m, 10H, Ar), 6.10 (d,  $J = 8.2$  Hz, 1H, NH-Ser), 5.55 (s, 1H, H-4), 5.32 (d,  $J = 11.2$  Hz, 1H, H-3), 5.22 (t,  $J = 8.4$  Hz, 2H), 5.13 (s, 2H), 4.98 (s, 1H, H-1), 4.63 (d,  $J = 8.1$  Hz, 1H, CH-Ser), 4.22 (d,  $J = 11.0$  Hz, 1H, CH<sub>2</sub>-Ser), 4.10 – 3.92 (m, 2H, H-5, CH<sub>2</sub>-Ser), 3.73 – 3.56 (m, 2H, H-2, H-6), 3.45 (d,  $J = 10.4$  Hz, 1H, H-6), 2.80 – 2.63 (m, 2H, CH<sub>2</sub>-Lev), 2.60 – 2.51 (m, 1H, CH<sub>2</sub>-Lev), 2.50 – 2.39 (m,

1H, CH<sub>2</sub>-Lev), 2.10 (s, 3H, CH<sub>3</sub>-Lev). <sup>13</sup>C NMR (101 MHz, CDCl<sub>3</sub>) δ 206.2, 171.7, 169.8, 166.1, 156.1, 136.3, 135.1, 133.9, 129.9, 129.0, 128.80, 128.76, 128.7, 128.3, 128.2, 99.7 (C-1), 70.3, 70.2, 68.7, 68.5, 68.0, 67.3, 61.1, 58.0, 54.8, 37.9, 29.7, 27.9. HRMS (ESI) calcd for C<sub>36</sub>H<sub>38</sub>N<sub>4</sub>O<sub>12</sub>Na [M+Na]<sup>+</sup> 741.2384, found 741.2383.

### 3,4,6-tri-*O*-benzyl-2-*O*-benzoyl-D-galactopyranosyl-2-(1-phenylvinyl)benzoate

(32)

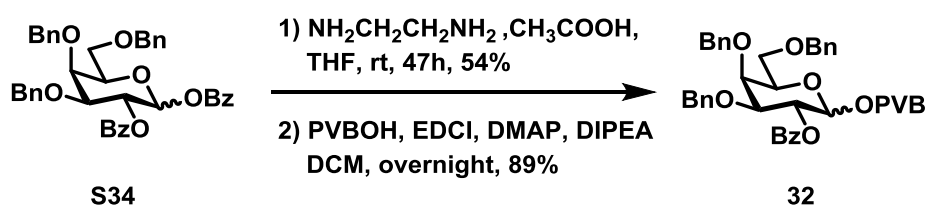

Anhydrous ethylenediamine (0.96 mL, 14.34 mmol) and acetic acid (0.41 mL, 7.17 mmol) are dissolved in anhydrous tetrahydrofuran (35 mL), then **S34**<sup>14</sup> (4.72 g, 7.17 mmol) dissolved in tetrahydrofuran (35 mL) is added, and stirred at room temperature for 47 h. After the reaction is completed, the reaction mixture was diluted with ethyl acetate and washed with 1M HCl, saturated NaHCO<sub>3</sub> solution and brine. The organic layer was concentrated under vacuum. The residue was purified by column chromatography on silica gel (PE:EA = 5:1 to 3:1) to give the intermediate (2.12 g, 54%) as a white solid. The above intermediate (2.12 g, 3.83 mmol) and PVBOH [2-(1-phenylvinyl) benzoic acid]<sup>15</sup> (1.03 mg, 4.59 mmol) was dissolved in anhydrous DCM (38 mL), and DMAP (467.7 mg, 3.83 mmol), EDCI (1.32 g, 6.89 mmol), DIPEA (1.9 mL, 11.48 mmol) was added, respectively. The resulting mixture was stirred overnight at room temperature. Upon completion, the solvent was evaporated in vacuum. The residue was purified by flash column chromatography (petroleum ether-EtOAc, 8:1) to afford **32** (2.60 g, 89%). β-isomer: [α]<sub>D</sub><sup>25</sup> = +29.9 (c 0.23, CHCl<sub>3</sub>). <sup>1</sup>H NMR (400 MHz, CDCl<sub>3</sub>) δ 7.90 (d, *J* = 7.7 Hz, 3H, Ar), 7.55 (t, *J* = 7.5 Hz, 1H, Ar), 7.48 – 7.25 (m, 15H, Ar), 7.24 – 7.16 (m, 2H, Ar), 7.15 – 7.04 (m, 8H, Ar), 5.82 (t, *J* = 9.1 Hz, 1H, H-2), 5.70 (d, *J* = 8.3 Hz, 1H, H-1), 5.53 (s, 1H, CH<sub>2</sub>=C-PVB), 4.98 (m, 2H, CH<sub>2</sub>=C-PVB, CH<sub>2</sub>-Bn), 4.63 (dd, *J* = 11.9, 5.2 Hz, 2H,

CH<sub>2</sub>-Bn), 4.46 (d, *J* = 12.5 Hz, 1H, CH<sub>2</sub>-Bn), 4.41 (s, 2H, CH<sub>2</sub>-Bn), 4.07 – 4.01 (m, 1H, H-4), 3.73 – 3.59 (m, 3H, H-3), 3.51 (dd, *J* = 8.9, 4.9 Hz, 1H). <sup>13</sup>C NMR (101 MHz, CDCl<sub>3</sub>) δ 165.3, 164.7, 149.2, 143.9, 140.4, 138.4, 137.8, 137.5, 133.2, 132.4, 131.4, 130.9, 130.0, 129.8, 128.9, 128.6, 128.5, 128.4, 128.1, 128.0, 127.9, 127.82, 127.80, 127.75, 127.4, 126.5, 114.0, 93.0 (C-1), 79.9, 74.8, 74.5, 73.7, 72.4, 71.9, 70.7, 67.8. HRMS (ESI) calcd for C<sub>49</sub>H<sub>44</sub>O<sub>8</sub>Na [M+Na]<sup>+</sup> 783.2934, found 783.2932.

**3,4,6-tri-*O*-benzoyl-2-deoxy-2-*N*-2,2,2-trichloroethoxycarbonyl-D-glucopyranosyl-2-(1-phenylvinyl)benzoate (33)**

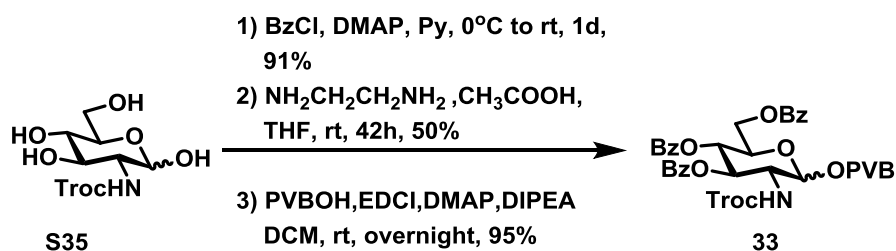

Compound **S35**<sup>16</sup> (2.57 g, 7.24 mmol) was dissolved in anhydrous pyridine (14 mL). The solution was cooled to 0 °C, DMAP (883.9 mg, 7.24 mmol) was added, and then BzCl (5 mL, 43.41 mmol) was added slowly. The resulting mixture was allowed to warm to room temperature and stirred 1d. Upon completion, the reaction mixture was diluted in EA, washed with 3M HCl, saturated NaHCO<sub>3</sub> solution and brine. The combined organic layer was concentrated under vacuum. The residue was purified by column chromatography on silica gel (PE:EA = 10:1 to 6:1) to give the intermediate (5.08 g, 91%). Anhydrous ethylenediamine (0.88 mL, 13.18 mmol) and acetic acid (0.38 mL, 6.59 mmol) are dissolved in anhydrous tetrahydrofuran (32 mL), then above intermediate (5.08 g, 6.59 mmol) dissolved in tetrahydrofuran (32 mL) was added, and stirred at room temperature for 42 h. After the reaction is completed, the reaction mixture was diluted with ethyl acetate and washed with 1M HCl, saturated NaHCO<sub>3</sub> solution and brine. The organic layer was concentrated under vacuum. The residue was purified by column chromatography on silica gel (PE:EA = 5:1 to 3:1) to give the intermediate (2.21 g, 50%,) as a white solid. The above intermediate (2.21 g, 3.32 mmol) and PVBOH (893.4 mg, 3.98 mmol) was dissolved in anhydrous DCM (33

mL), and DMAP (405.6 mg, 3.32 mmol), EDCI (1.15 g, 5.98 mmol), DIPEA (1.6 mL, 9.96 mmol) was added, respectively. The resulting mixture was stirred overnight at room temperature. Upon completion, the solvent was evaporated in vacuum. The residue was purified by flash column chromatography (petroleum ether-EtOAc, 6:1) to afford **33** (2.76 g, 95%).  $\alpha$ -isomer:  $[\alpha]_D^{25} = +72.2$  (c 0.12, CHCl<sub>3</sub>). <sup>1</sup>H NMR (400 MHz, CDCl<sub>3</sub>)  $\delta$  8.06 (d,  $J = 7.8$  Hz, 1H, Ar), 7.98 (d,  $J = 7.8$  Hz, 2H, Ar), 7.90 (d,  $J = 7.7$  Hz, 2H, Ar), 7.85 (d,  $J = 7.8$  Hz, 2H, Ar), 7.60 (t,  $J = 7.6$  Hz, 1H, Ar), 7.55 – 7.45 (m, 6H, Ar), 7.43 – 7.31 (m, 9H, Ar), 7.30 – 7.23 (m, 1H, Ar), 6.47 (d,  $J = 3.8$  Hz, 1H, H-1), 6.20 (s, 1H, CH<sub>2</sub>=C-PVB), 5.60 (t,  $J = 9.9$  Hz, 1H, H-4), 5.40 (t,  $J = 10.4$  Hz, 1H, H-3), 5.36 (s, 1H, CH<sub>2</sub>=C-PVB), 4.92 (d,  $J = 9.7$  Hz, 1H), 4.67 (d,  $J = 12.0$  Hz, 1H), 4.49 – 4.41 (m, 2H, H-2), 4.35 (dd,  $J = 12.5, 2.8$  Hz, 1H, H-6), 4.20 (dd,  $J = 12.4, 4.3$  Hz, 1H, H-6), 3.83 – 3.75 (m, 1H, H-5). <sup>13</sup>C NMR (101 MHz, CDCl<sub>3</sub>)  $\delta$  166.4, 166.3, 166.1, 165.1, 154.2, 149.4, 142.6, 138.9, 133.63, 133.60, 133.2, 133.0, 131.4, 131.3, 130.0, 129.94, 129.86, 129.7, 129.6, 129.0, 128.9, 128.8, 128.66, 128.53, 128.49, 128.1, 126.8, 113.6, 95.2, 91.7 (C-1), 74.6, 71.5, 70.4, 68.6, 62.3, 53.7. HRMS (ESI) calcd for C<sub>45</sub>H<sub>36</sub>NO<sub>11</sub>Cl<sub>3</sub>Na [M+Na]<sup>+</sup> 894.1252, found 894.1248.

**2-azido-3-O-benzoyl-2-deoxy-4,6-O-(di-tert-butylsilylene)-D-galactopyranosyl-2-(1-phenylvinyl)benzoate (34)**

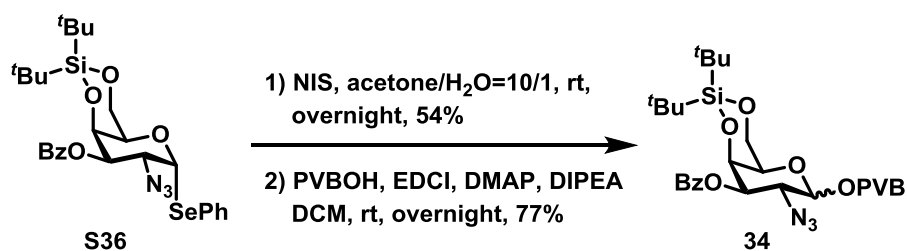

Compound **S36**<sup>17</sup> (505.5 mg, 0.86 mmol) was dissolved in acetone/H<sub>2</sub>O (7.5 mL/0.8 mL), then NIS (N-Iodosuccinimide) (289.8 mg, 1.29 mmol) was added. The resulting mixture was stirred for overnight. The solution was diluted with EtOAc, washed with saturated Na<sub>2</sub>S<sub>2</sub>O<sub>3</sub>, water and brine, dried over anhydrous Na<sub>2</sub>SO<sub>4</sub>, filtered and concentrated in vacuo. The residue was purified by flash column chromatography (petroleum ether-EtOAc, 4:1) to give the intermediate (209.7 mg,

54%). The above intermediate (205 mg, 0.46 mmol) and PVBOH (122.7 mg, 0.55 mmol) was dissolved in anhydrous DCM (4.6 mL), and DMAP (55.7 mg, 0.46 mmol), EDCI (157.3 mg, 0.82 mmol), DIPEA (0.23 mL, 1.37 mmol) was added, respectively. The resulting mixture was stirred overnight at room temperature. Upon completion, the solvent was evaporated in vacuum. The residue was purified by flash column chromatography (petroleum ether-EtOAc, 4:1) to afford **34** (230.7 mg, 77%) as a white solid.  $\alpha$ -isomer:  $[\alpha]_D^{23} = +227.7$  (c 0.17, CHCl<sub>3</sub>). <sup>1</sup>H NMR (400 MHz, CDCl<sub>3</sub>)  $\delta$  8.03 – 7.97 (m, 2H, Ar), 7.94 – 7.90 (m, 1H, Ar), 7.52 – 7.42 (m, 2H, Ar), 7.40 – 7.33 (m, 3H, Ar), 7.29 – 7.24 (m, 2H, Ar), 7.24 – 7.16 (m, 3H, Ar), 7.17 – 7.11 (m, 1H, Ar), 6.33 (d, *J* = 3.6 Hz, 1H, H-1), 5.84 (s, 1H, CH<sub>2</sub>=C-PVB), 5.17 (s, 1H, CH<sub>2</sub>=C-PVB), 5.09 (dd, *J* = 10.8, 3.0 Hz, 1H, H-3), 4.47 (d, *J* = 3.3 Hz, 1H, H-4), 4.14 (dd, *J* = 10.7, 3.6 Hz, 1H, H-2), 3.73 (d, *J* = 2.1 Hz, 2H, H-6), 2.89 (s, 1H, H-5), 0.93 (s, 9H, CH<sub>3</sub>-*t*-Bu), 0.81 (s, 9H, CH<sub>3</sub>-*t*-Bu). <sup>13</sup>C NMR (101 MHz, CDCl<sub>3</sub>)  $\delta$  166.0, 165.8, 148.3, 142.8, 139.7, 133.5, 132.5, 131.5, 130.9, 130.1, 129.8, 129.7, 128.6, 128.5, 127.95, 127.87, 126.6, 114.4, 91.9 (C-1), 72.5, 69.9, 69.2, 66.6, 57.2, 27.5, 27.3, 23.3, 20.8. HRMS (ESI) calcd for C<sub>36</sub>H<sub>41</sub>N<sub>3</sub>O<sub>7</sub>SiNa [M+Na]<sup>+</sup> 678.2606, found 678.2606.

### Synthesis of core 1 mucin-type *O*-glycan (**2**)

**L-Serine** *O*-(3,4,6-tri-*O*-benzyl-2-*O*-benzoyl- $\beta$ -D-galatopyranosyl)-(1 $\rightarrow$ 3)-*N*-(benzyloxycarbonyl)-*O*-(2-azido-4-*O*-benzoyl-6-*O*-tert-butyl-diphenylsilyl-2-deoxy- $\alpha$ -D-galactopyranosyl)-benzyl ester (**22**)

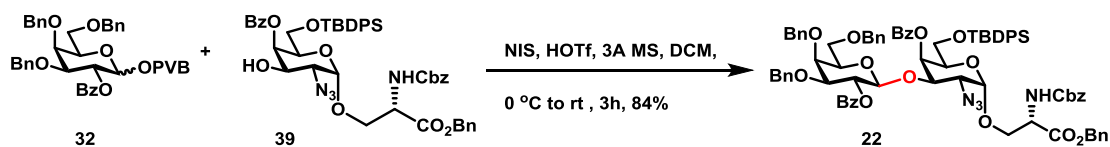

A suspension of donor **32** (94.7 mg, 0.12 mmol), acceptor **39** (71.3 mg, 0.083 mmol), and activated 3 Å MS (170 mg) in anhydrous DCM (2.5 mL) was stirred at room temperature for 15 min and was then cooled to 0 °C. NIS (56.0 mg, 0.25 mmol) and HOTf (Trifluoromethanesulfonic acid) (6  $\mu$ L, 0.062 mmol) were added successively. The resulting mixture was stirred at room temperature for 3 h, then

quenched with Et<sub>3</sub>N (1 mL) and filtered. The filtrates were concentrated under vacuum to give a residue, which was purified by flash column chromatography (petroleum ether-ethyl acetate, 6:1 to 5:1) to afford **22** (101.9 mg, 84%) as a white solid.  $[\alpha]_D^{24} = +76.0$  (c 0.16, CHCl<sub>3</sub>). <sup>1</sup>H NMR (400 MHz, CDCl<sub>3</sub>)  $\delta$  7.95 (d,  $J = 7.7$  Hz, 2H, Ar), 7.86 (d,  $J = 7.6$  Hz, 2H, Ar), 7.60 (d,  $J = 7.0$  Hz, 2H, Ar), 7.56 (d,  $J = 7.2$  Hz, 2H, Ar), 7.53 – 7.47 (m, 2H, Ar), 7.40 – 7.26 (m, 23H, Ar), 7.25 – 7.20 (m, 8H, Ar), 7.18 – 7.14 (m, 1H, Ar), 7.13 – 7.08 (m, 3H, Ar), 5.70 (d,  $J = 3.4$  Hz, 1H, H-4<sub>GalN</sub>), 5.66 (d,  $J = 9.7$  Hz, 1H), 5.50 (dd,  $J = 10.1, 7.7$  Hz, 1H, H-2<sub>Gal</sub>), 5.16 – 5.03 (m, 4H, CH<sub>2</sub>-Bn, CH<sub>2</sub>-Cbz), 4.89 (d,  $J = 11.9$  Hz, 1H, CH<sub>2</sub>-Bn), 4.77 (d,  $J = 3.7$  Hz, 1H, H-1<sub>GalN</sub>), 4.73 (d,  $J = 7.8$  Hz, 1H, H-1<sub>Gal</sub>), 4.62 – 4.51 (m, 3H, CH<sub>2</sub>-Bn), 4.48 – 4.36 (m, 3H, CH<sub>2</sub>-Bn), 4.05 (dd,  $J = 10.7, 3.3$  Hz, 1H, H-3<sub>GalN</sub>), 3.99 – 3.91 (m, 4H), 3.70 (dd,  $J = 11.0, 5.2$  Hz, 1H), 3.65 (s, 3H), 3.62 – 3.55 (m, 2H, H-3<sub>Gal</sub>), 3.51 (dd,  $J = 10.6, 3.6$  Hz, 1H, H-2<sub>GalN</sub>), 0.99 (s, 9H, CH<sub>3</sub>-*t*-Bu). <sup>13</sup>C NMR (101 MHz, CDCl<sub>3</sub>)  $\delta$  169.8, 165.3, 165.2, 156.1, 138.8, 138.1, 137.7, 136.2, 135.64, 135.62, 135.2, 133.25, 133.18, 132.79, 132.75, 130.4, 130.2, 129.90, 129.86, 129.73, 129.71, 128.73, 128.68, 128.61, 128.55, 128.39, 128.37, 128.35, 128.27, 128.21, 128.18, 128.0, 127.9, 127.72, 127.70, 127.68, 127.59, 127.2, 102.3 (C-1<sub>Gal</sub>), 99.2 (C-1<sub>GalN</sub>), 79.6, 77.4, 74.7, 74.3, 73.7, 73.6, 72.4, 71.8, 71.5, 71.2, 70.3, 68.9, 68.2, 67.7, 67.4, 62.8, 59.6, 54.4, 26.8, 19.2. HRMS (ESI) calcd for C<sub>81</sub>H<sub>82</sub>N<sub>4</sub>O<sub>16</sub>SiNa [M+Na]<sup>+</sup> 1417.5393, found 1417.5392.

**$\beta$ -D-galactopyranosyl-(1 $\rightarrow$ 3)*O*-[2-(Acetylamino)-2-deoxy- $\alpha$ -D-galactopyranosyl]-L-serine (**2**)**

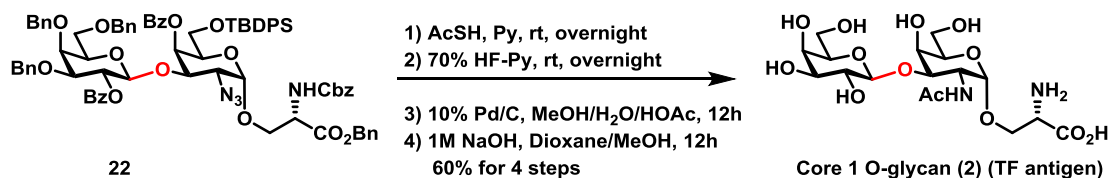

To a solution of compound **22** (245 mg, 0.17 mmol) in pyridine (3.4 mL) was added AcSH (3.09 mL, 34 mmol). The reaction mixture was stirred overnight at room temperature. Then the reaction mixture was concentrated *in vacuo*. The residue was

---

purified by flash chromatography (MeOH/DCM, 1:25) to afford intermediate (213.9 mg, 86%). To a solution of above intermediate (213 mg, 0.15 mmol) in anhydrous THF (3 mL) was added HF/pyridine (70%, 0.19 mL, 1.47 mmol) dropwise. After stirring overnight at room temperature, the reaction mixture was quenched with Et<sub>3</sub>N (1mL), diluted with ethyl acetate and washed with saturated NaHCO<sub>3</sub> solution and brine. The organic layer was concentrated under vacuum. The residue was purified by column chromatography on silica gel (DCM/MeOH, 30:1) to afford the intermediate (174 mg, 98%). A mixture of the above intermediate (170 mg, 0.14 mmol) and Pd/C (331.4 mg, 10%) in MeOH/H<sub>2</sub>O/HOAc (8 mL/0.8 mL/0.08 mL) was stirred under an atmosphere of H<sub>2</sub> at room temperature for 12 h, after which the reaction mixture was filtered and concentrated *in vacuo*. The residue was purified by column chromatography on RP-18 (MeOH-H<sub>2</sub>O = 2:1) to afford the intermediate (104.7 mg, 76%). To a solution of above intermediate (104 mg, 0.10 mmol) in Dioxane/MeOH (1.5mL/1.5mL) was added 1.5 mL 1M NaOH aq. The reaction was stirred for 12 h at room temperature. After the reaction was completed, the reaction was neutralized to pH = 7 by acetic acid, then filtered and concentrated. The residue was purified by column chromatography on Sephadex TM LH-20 (MeOH-H<sub>2</sub>O =1:1) to afford **2** (46.3 mg, 94%) as a white solid.  $[\alpha]_D^{20} = +82.0$  (c 0.10, H<sub>2</sub>O). <sup>1</sup>H NMR (400 MHz, D<sub>2</sub>O)  $\delta$  4.92 (d, *J* = 3.4 Hz, 1H), 4.47 (d, *J* = 7.7 Hz, 1H), 4.36 (dd, *J* = 11.0, 3.4 Hz, 1H), 4.24 (s, 1H), 4.16 – 4.03 (m, 2H), 4.02 – 3.96 (m, 2H), 3.95 – 3.87 (m, 2H), 3.83 – 3.71 (m, 4H), 3.68 – 3.59 (m, 2H), 3.55 – 3.48 (m, 1H), 2.03 (s, 3H). <sup>13</sup>C NMR (101 MHz, D<sub>2</sub>O)  $\delta$  174.7, 171.8, 104.7, 98.3, 76.8, 75.1, 72.6, 71.2, 70.7, 68.8, 68.7, 61.3, 61.1, 48.5, 22.2. HRMS (ESI) calcd for C<sub>17</sub>H<sub>29</sub>N<sub>2</sub>O<sub>13</sub> [M-H] 469.1675, found 469.1680.

#### Synthesis of core 3 mucin-type *O*-glycan (**4**)

**L-Serine *O*-(3,4,6-tri-*O*-benzoyl-2-deoxy-2-*N*-2,2,2-tri-chloroethoxycarbonyl- $\beta$ -D-glucopyranosyl)-(1 $\rightarrow$ 3)-*N*-(benzyloxycarbonyl)-*O*-(2-azido-4-*O*-benzoyl-6-*O*-tert-butyldiphenylsilyl-2-deoxy- $\alpha$ -D-galactopyranosyl)-benzyl ester (**23**)**



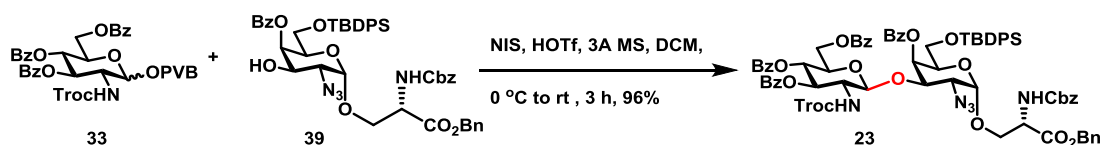

A suspension of donor **33** (117.1 mg, 0.13 mmol), acceptor **39** (76.8 mg, 0.089 mmol), and activated 3Å MS (200 mg) in anhydrous DCM (4 mL) was stirred at room temperature for 15 min and was then cooled to 0 °C. NIS (60.3 mg, 0.27 mmol) and HOTf (Trifluoromethanesulfonic acid) (6 µL, 0.067 mmol) were added successively. The resulting mixture was stirred at room temperature for 3 h, then quenched with Et<sub>3</sub>N (1 mL) and filtered. The filtrates were concentrated under vacuum to give a residue, which was purified by flash column chromatography (petroleum ether-ethyl acetate, 4:1) to afford **23** (133.3 mg, 96%) as a white solid.  $[\alpha]_D^{25} = +62.3$  (c 0.23, CHCl<sub>3</sub>). <sup>1</sup>H NMR (400 MHz, CDCl<sub>3</sub>) δ 7.94 (d, *J* = 7.8 Hz, 2H, Ar), 7.85 (t, *J* = 7.1 Hz, 6H, Ar), 7.60 (d, *J* = 7.0 Hz, 2H, Ar), 7.53 (d, *AJ* = 7.2 Hz, 2H, Ar), 7.44 (d, *J* = 7.4 Hz, 5H, Ar), 7.40 – 7.25 (m, 20H, Ar), 7.25 – 7.17 (m, 3H, Ar), 5.85 – 5.73 (m, 2H, H-4<sub>GalN</sub>, H-3<sub>GlcN</sub>), 5.59 (t, *J* = 9.6 Hz, 1H, H-4<sub>GlcN</sub>), 5.36 – 5.17 (m, 3H), 5.15 – 5.01 (m, 3H, H-1<sub>GlcN</sub>), 4.90 – 4.85 (m, 1H, H-1<sub>GalN</sub>), 4.64 (d, *J* = 8.7 Hz, 1H), 4.60 – 4.47 (m, 3H), 4.41 (d, *J* = 12.0 Hz, 1H), 4.27 – 4.20 (m, 1H, H-3<sub>GalN</sub>), 4.11 – 3.95 (m, 4H, H-5<sub>GlcN</sub>), 3.82 (q, *J* = 9.2 Hz, 1H, H-2<sub>GlcN</sub>), 3.74 – 3.57 (m, 3H, H-2<sub>GalN</sub>), 0.97 (s, 9H, CH<sub>3</sub>-*t*-Bu). <sup>13</sup>C NMR (101 MHz, CDCl<sub>3</sub>) δ 169.9, 166.2, 166.1, 165.1, 164.8, 156.2, 154.1, 136.1, 135.63, 135.57, 135.2, 133.5, 133.4, 133.1, 133.05, 132.96, 130.0, 129.83, 129.77, 129.74, 128.9, 128.8, 128.7, 128.5, 128.44, 128.42, 128.38, 128.32, 127.7, 101.3 (C-1<sub>GlcN</sub>), 98.9 (C-1<sub>GalN</sub>), 95.3, 77.4, 75.3, 74.4, 72.2, 71.1, 69.9, 69.3, 69.0, 67.8, 67.4, 62.7, 62.5, 59.8, 56.9, 54.5, 26.8, 19.1. HRMS (ESI) calcd for C<sub>77</sub>H<sub>74</sub>Cl<sub>3</sub>N<sub>5</sub>O<sub>19</sub>SiNa [M+Na]<sup>+</sup> 1528.3711, found 1528.3712.

***O*-[2-(Acetylamino)-2-deoxy-β-D-glucopyranosyl)-(1→3)-*O*-[2-(Acetylamino)-2-deoxy-α-D-galactopyranosyl]- L-serine (4)**

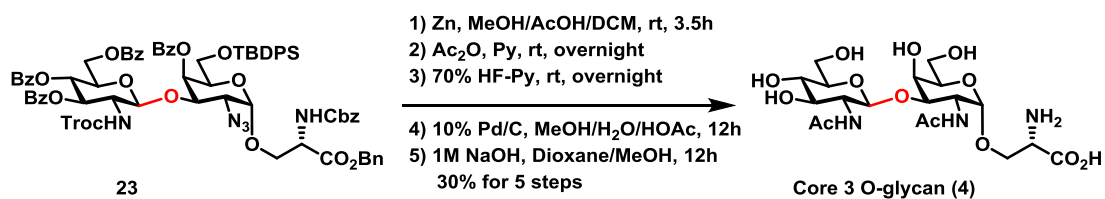

To a solution of compound **23** (260 mg, 0.17 mmol) in MeOH/AcOH/DCM (24mL/12mL/12mL) was added Zn powder (1.6 g, 25.86 mmol). The reaction mixture was stirred at room temperature for 3.5 h. Then the reaction mixture was filtered, the solvent was removed under vacuum to give the intermediate. The above intermediate was then dissolved in anhydrous pyridine (1.7 mL), and Ac<sub>2</sub>O (0.81 mL, 8.62 mmol) was added slowly. The reaction mixture was stirred overnight at room temperature. Then the reaction mixture was concentrated *in vacuo*. The residue was purified by flash chromatography (MeOH/DCM, 1:50 to 1:20) to afford intermediate (183.6 mg, 77%). To a solution of above intermediate (180 mg, 0.13 mmol) in anhydrous THF (1.3 mL) was added HF/pyridine (70%, 0.17 mL, 1.29 mmol) dropwise. After stirring overnight at room temperature, the reaction mixture was quenched with Et<sub>3</sub>N (1mL), diluted with ethyl acetate and washed with saturated NaHCO<sub>3</sub> solution and brine. The organic layer was concentrated under vacuum. The residue was purified by column chromatography on silica gel (DCM/MeOH, 30:1) to afford the intermediate (89.2 mg, 60%). A mixture of the above intermediate (88 mg, 0.08 mmol) and Pd/C (181 mg, 10%) in MeOH/H<sub>2</sub>O/HOAc (5 mL/0.5 mL/0.05 mL) was stirred under an atmosphere of H<sub>2</sub> at room temperature for 14 h, after which the reaction mixture was filtered and concentrated *in vacuo*. The residue was purified by column chromatography on RP-18 (MeOH-H<sub>2</sub>O = 4:1) to afford the intermediate (55.7 mg, 79%). To a solution of above intermediate (55 mg, 0.06 mmol) in Dioxane/MeOH (1mL/1mL) was added 1 mL 1M NaOH aq. The reaction was stirred for 12 h at room temperature. After the reaction was completed, the reaction was neutralized to pH = 7 by acetic acid, then filtered and concentrated. The residue was purified by column chromatography on Sephadex TM LH-20 (MeOH-H<sub>2</sub>O = 1:1) to afford **4** (24.9 mg, 82%) as a white solid.  $[\alpha]_D^{20} = +91.5$  (c 0.22, H<sub>2</sub>O). <sup>1</sup>H NMR (600 MHz, D<sub>2</sub>O)  $\delta$  4.85 (d, *J* = 3.8 Hz, 1H), 4.56 (d, *J* = 8.4 Hz, 1H), 4.26 (dd, *J* = 11.1, 3.8 Hz, 1H), 4.20 (d, *J* = 2.7 Hz, 1H), 4.09 (dd, *J* = 11.2,

2.9 Hz, 1H), 4.02 – 3.97 (m, 2H), 3.95 (dd,  $J = 8.1, 4.1$  Hz, 1H), 3.92 – 3.86 (m, 2H), 3.80 – 3.70 (m, 3H), 3.66 (dd,  $J = 10.3, 8.4$  Hz, 1H), 3.56 – 3.51 (m, 1H), 3.44 (t,  $J = 9.2$  Hz, 1H), 3.42 – 3.38 (m, 1H), 2.03 (s, 3H), 1.99 (s, 3H).  $^{13}\text{C}$  NMR (151 MHz,  $\text{D}_2\text{O}$ )  $\delta$  174.4, 173.7, 171.7, 102.3, 98.1, 76.1, 75.5, 73.3, 70.9, 69.6, 68.6, 66.6, 61.2, 60.4, 55.5, 54.4, 48.1, 22.2, 22.1. HRMS (ESI) calcd for  $\text{C}_{19}\text{H}_{32}\text{N}_3\text{O}_{13}$  [ $\text{M}-\text{H}$ ] 510.1941, found 510.1945.

### Synthesis of core 5 mucin-type *O*-glycan (6)

**L-Serine**      ***O*-(2-azido-3-*O*-benzoyl-2-deoxy-4,6-*O*-(di-*tert*-butylsilylene)- $\alpha$ -D-galactopyranosyl)-(1 $\rightarrow$ 3)-*N*-(benzyloxycarbonyl)-*O*-(2-azido-4-*O*-benzoyl-6-*O*-*tert*-butyldiphenylsilyl)-2-deoxy- $\alpha$ -D-galactopyranosyl)-benzyl ester (24)**

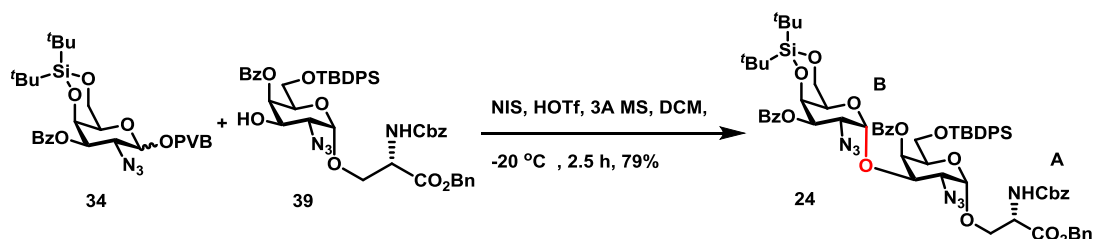

A suspension of donor **34** (101.2 mg, 0.15 mmol), acceptor **39** (88.4 mg, 0.10 mmol), and activated 3Å MS (200 mg) in anhydrous DCM (3 mL) was stirred at room temperature for 15 min and was then cooled to  $-20$  °C. NIS (52.1 mg, 0.23 mmol) and HOTf (Trifluoromethanesulfonic acid) (7  $\mu\text{L}$ , 0.077 mmol) were added successively. The resulting mixture was stirred at  $-20$  °C for 2.5 h, then quenched with  $\text{Et}_3\text{N}$  (1 mL) and filtered. The filtrates were concentrated under vacuum to give a residue, which was purified by flash column chromatography (petroleum ether-ethyl acetate, 5:1 to 4:1) to afford **24** (103.2 mg, 79%) as a white solid.  $[\alpha]_{\text{D}}^{26} = +178.2$  (c 0.12,  $\text{CHCl}_3$ ).  $^1\text{H}$  NMR (400 MHz,  $\text{CDCl}_3$ )  $\delta$  8.01 (dd,  $J = 5.8, 3.9$  Hz, 4H, Ar), 7.68 – 7.63 (m, 2H, Ar), 7.57 – 7.51 (m, 2H, Ar), 7.49 (d,  $J = 7.4$  Hz, 2H, Ar), 7.44 – 7.32 (m, 16H, Ar), 7.30 – 7.23 (m, 2H, Ar), 7.10 (t,  $J = 7.5$  Hz, 2H, Ar), 5.93 (d,  $J = 3.3$  Hz, 1H, H-4<sub>A</sub>), 5.75 (d,  $J = 8.6$  Hz, 1H), 5.58 (d,  $J = 3.8$  Hz, 1H, H-1<sub>B</sub>), 5.32 (dd,  $J = 10.9, 3.0$  Hz, 1H, H-3<sub>B</sub>), 5.23 (q,  $J = 12.2$  Hz, 2H), 5.06 (d,  $J = 2.5$  Hz, 2H), 4.87 (d,  $J = 3.3$  Hz, 2H, H-4<sub>B</sub>, H-1<sub>A</sub>), 4.60 (dd,  $J = 7.8, 4.0$  Hz, 1H), 4.32 – 4.26 (m, 3H, H-3<sub>A</sub>), 4.13 – 4.07 (m,

1H), 4.05 – 3.99 (m, 2H, H-2<sub>B</sub>, H-4<sub>B</sub>), 3.97 – 3.90 (m, 2H), 3.73 – 3.66 (m, 2H, H-2<sub>A</sub>), 3.62 (dd, *J* = 10.1, 7.6 Hz, 1H), 1.10 (s, 9H, CH<sub>3</sub>-*t*-Bu), 1.00 (s, 9H, CH<sub>3</sub>-*t*-Bu), 0.95 (s, 9H, CH<sub>3</sub>-*t*-Bu). <sup>13</sup>C NMR (101 MHz, CDCl<sub>3</sub>) δ 169.7, 165.9, 165.7, 156.1, 136.1, 135.6, 135.5, 135.2, 133.3, 132.8, 132.6, 129.9, 129.85, 129.82, 129.79, 129.71, 129.6, 128.81, 128.75, 128.65, 128.52, 128.50, 128.33, 128.30, 127.9, 127.7, 99.1 (C-1<sub>A</sub>), 94.0 (C-1<sub>B</sub>), 71.5, 70.4, 70.1, 69.8, 69.4, 67.8, 67.7, 67.3, 67.0, 64.9, 61.6, 59.7, 57.0, 54.5, 27.7, 27.4, 26.8, 23.3, 20.8, 19.1. HRMS (ESI) calcd for C<sub>68</sub>H<sub>79</sub>N<sub>7</sub>O<sub>15</sub>Si<sub>2</sub>Na [M+Na]<sup>+</sup> 1312.5070, found 1312.5072.

***O*-[2-(Acetylamino)-2-deoxy- $\alpha$ -D-galactopyranosyl]-(1 $\rightarrow$ 3)-*O*-[2-(Acetylamino)-2-deoxy- $\alpha$ -D-galactopyranosyl]- L-serine (6)**

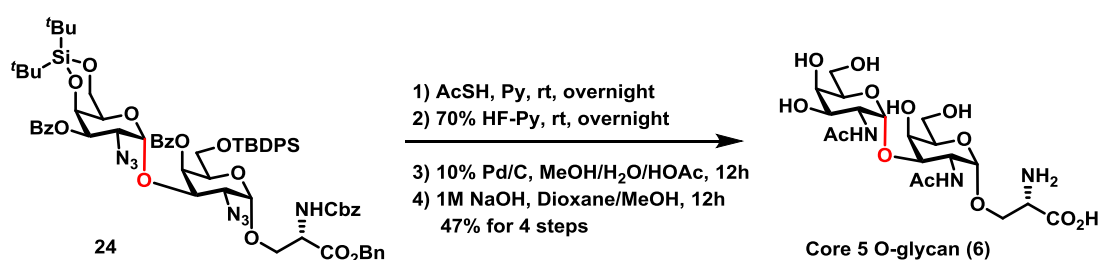

To a solution of compound **24** (109 mg, 0.08 mmol) in pyridine (1.7 mL) was added AcSH (3.06 mL, 33.78 mmol). The reaction mixture was stirred overnight at room temperature. Then the reaction mixture was concentrated *in vacuo*. The residue was purified by flash chromatography (MeOH/DCM, 1:25) to afford intermediate (104.4 mg, 93%). To a solution of above intermediate (104 mg, 0.08 mmol) in anhydrous THF (2 mL) was added HF/pyridine (70%, 0.2 mL, 1.57 mmol) dropwise. After stirring overnight at room temperature, the reaction mixture was quenched with Et<sub>3</sub>N (1mL), diluted with ethyl acetate and washed with saturated NaHCO<sub>3</sub> solution and brine. The organic layer was concentrated under vacuum. The residue was purified by column chromatography on silica gel (DCM/MeOH, 25:1) to afford the intermediate (63.2 mg, 85%). A mixture of the above intermediate (63 mg, 0.07 mmol) and Pd/C (158 mg, 10%) in MeOH/H<sub>2</sub>O/HOAc (5 mL/0.5 mL/0.05 mL) was stirred under an atmosphere of H<sub>2</sub> at room temperature for 12 h, after which the reaction mixture was filtered and concentrated *in vacuo*. The residue was purified by column

chromatography on RP-18 (MeOH-H<sub>2</sub>O = 1.5:1) to afford the intermediate (36.4 mg, 76%). To a solution of above intermediate (36 mg, 0.05 mmol) in dioxane/MeOH (1mL/1mL) was added 1 mL 1M NaOH aq. The reaction was stirred for 12 h at room temperature. After the reaction was completed, the reaction was neutralized to pH = 7 by acetic acid, then filtered and concentrated. The residue was purified by column chromatography on Sephadex TM LH-20 (MeOH-H<sub>2</sub>O = 1:1) to afford **6** (19.9 mg, 78%) as a white solid.  $[\alpha]_D^{20} = +195.0$  (c 0.08, H<sub>2</sub>O). <sup>1</sup>H NMR (400 MHz, D<sub>2</sub>O)  $\delta$  5.09 (d, *J* = 3.7 Hz, 1H), 4.96 (d, *J* = 3.7 Hz, 1H), 4.42 (dd, *J* = 11.1, 3.7 Hz, 1H), 4.29 – 4.15 (m, 2H), 4.15 – 4.07 (m, 1H), 4.07 – 3.97 (m, 2H), 3.99 – 3.70 (m, 9H), 2.08 (s, 3H), 2.05 (s, 3H). <sup>3</sup>C NMR (151 MHz, D<sub>2</sub>O)  $\delta$  174.6, 174.4, 172.9, 97.9, 93.1, 71.7, 71.23, 71.20, 68.3, 67.7, 66.9, 64.2, 61.3, 61.0, 54.6, 49.3, 47.7, 22.0, 21.9. HRMS (ESI) calcd for C<sub>19</sub>H<sub>32</sub>N<sub>3</sub>O<sub>13</sub> [M-H]<sup>-</sup> 510.1941, found 510.1945.

### Synthesis of core 8 mucin-type *O*-glycan (**9**)

**L-Serine**                    *O*-(2,3-di-*O*-benzoyl-4,6-*O*-(di-*tert*-butylsilylene)- $\alpha$ -D-galactopyranosyl)-(1 $\rightarrow$ 3)-*N*-(benzyloxycarbonyl)-*O*-(2-azido-4-*O*-benzoyl-6-*O*-*tert*-butyldiphenylsilyl-2-deoxy- $\alpha$ -D-galactopyranosyl)-benzyl ester (**25**)

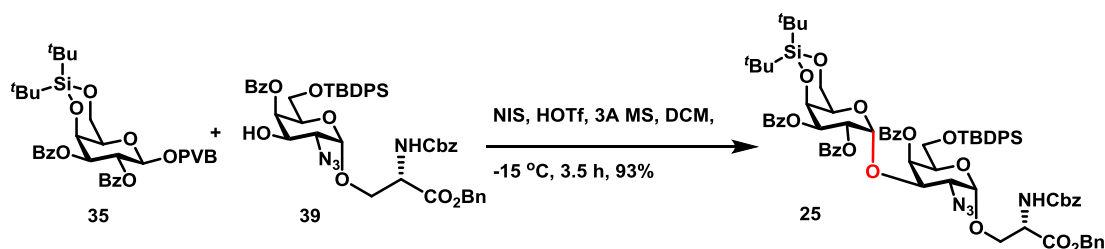

A suspension of donor **35** (273.9 mg, 0.37 mmol), acceptor **39** (246.3 mg, 0.29 mmol), and activated 3Å MS (550 mg) in anhydrous DCM (11 mL) was stirred at room temperature for 15 min and was then cooled to -15 °C. NIS (125.8 mg, 0.56 mmol) and HOTf (Trifluoromethanesulfonic acid) (13  $\mu$ L, 0.15 mmol) were added successively. The resulting mixture was stirred at -15 °C for 3.5 h, then quenched with Et<sub>3</sub>N (4 mL) and filtered. The filtrates were concentrated under vacuum to give a residue, which was purified by flash column chromatography (petroleum ether-ethyl acetate, 6:1 to 4:1) to afford **25** (364.5mg, 93%) as a white solid.  $[\alpha]_D^{25} = + 164.3$  (c

0.36, CHCl<sub>3</sub>). <sup>1</sup>H NMR (400 MHz, CDCl<sub>3</sub>) δ 7.92 – 7.86 (m, 2H, Ar), 7.70 – 7.65 (m, 2H, Ar), 7.60 – 7.56 (m, 2H, Ar), 7.46 – 7.38 (m, 7H, Ar), 7.36 – 7.21 (m, 16H, Ar), 7.09 – 6.96 (m, 6H, Ar), 5.97 (dd, *J* = 10.8, 3.7 Hz, 1H, H-2<sub>Gal</sub>), 5.77 – 5.69 (m, 3H, H-1<sub>Gal</sub>, H-4<sub>GalN</sub>), 5.58 (dd, *J* = 10.8, 3.0 Hz, 1H, H-3<sub>Gal</sub>), 5.24 (d, *J* = 2.9 Hz, 2H), 5.07 (s, 2H), 4.91 (d, *J* = 3.3 Hz, 2H, H-1<sub>GalN</sub>, H-4<sub>Gal</sub>), 4.60 (dd, *J* = 7.8, 3.9 Hz, 1H), 4.31 (dd, *J* = 10.9, 2.8 Hz, 3H, H-3<sub>GalN</sub>), 4.08 (d, *J* = 12.2 Hz, 2H), 3.99 – 3.90 (m, 2H), 3.79 (dd, *J* = 10.9, 3.6 Hz, 1H, H-2<sub>GalN</sub>), 3.57 (dd, *J* = 10.3, 6.4 Hz, 1H), 3.49 (dd, *J* = 10.3, 6.9 Hz, 1H), 1.18 (s, 9H, CH<sub>3</sub>-*t*-Bu), 0.98 (s, 9H, CH<sub>3</sub>-*t*-Bu), 0.93 (s, 9H, CH<sub>3</sub>-*t*-Bu). <sup>13</sup>C NMR (101 MHz, CDCl<sub>3</sub>) δ 169.7, 166.1, 166.0, 164.8, 156.1, 136.1, 135.6, 135.4, 135.2, 133.1, 132.8, 132.6, 129.8, 129.69, 129.65, 129.5, 129.4, 128.82, 128.79, 128.72, 128.63, 128.59, 128.32, 128.30, 128.27, 128.1, 128.0, 127.8, 127.7, 127.6, 98.9 (C-1<sub>GalN</sub>), 93.1 (C-1<sub>Gal</sub>), 71.4, 70.9, 70.6, 69.6, 69.2, 67.8, 67.6, 67.29, 67.25, 66.9, 65.5, 61.9, 60.5, 59.7, 54.5, 27.7, 27.4, 26.7, 23.4, 20.8, 19.0, 14.3. MS (Maldi-TOF) calcd for C<sub>75</sub>H<sub>84</sub>N<sub>4</sub>O<sub>17</sub>Si<sub>2</sub>Na [M+Na]<sup>+</sup> 1391.5268, found 1391.5269.

***α*-D-galatopyranosyl-(1→3)-O-[2-(Acetylamino)-2-deoxy-*α*-D-galactopyranosyl]-L-serine (9)**

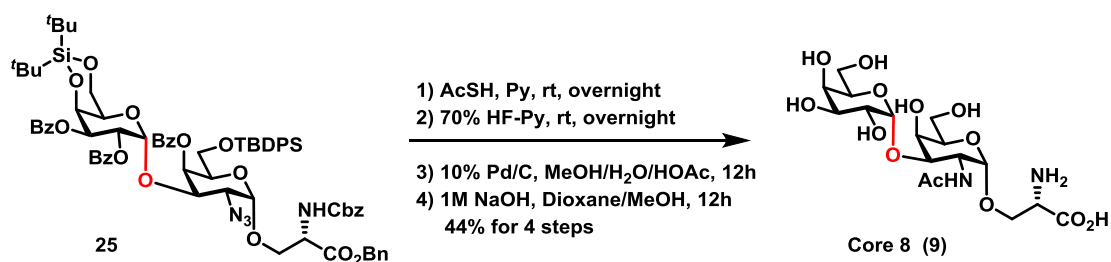

To a solution of compound **25** (362 mg, 0.26 mmol) in pyridine (5mL) was added AcSH (3.9 mL, 52.86 mmol). The reaction mixture was stirred overnight at room temperature. Then the reaction mixture was concentrated *in vacuo*. The residue was purified by flash chromatography (PE/EA/DCM, 6:3:1) to afford intermediate (366.2 mg, 82%). To a solution of above intermediate (323.9 mg, 0.24 mmol) in anhydrous THF (8 mL) was added HF/pyridine (70%, 0.21 mL, 2.33 mmol) dropwise. After stirring overnight at room temperature, the reaction mixture was quenched with Et<sub>3</sub>N, diluted with ethyl acetate and washed with saturated NaHCO<sub>3</sub> solution and brine. The

organic layer was concentrated under vacuum. The residue was purified by column chromatography on silica gel (DCM/MeOH, 40:1) to afford the intermediate (203.8 mg, 87%). A mixture of the above intermediate (93 mg, 0.09 mmol) and Pd/C (196.6 mg, 10%) in MeOH/H<sub>2</sub>O/HOAc (6 mL/0.6 mL/0.06 mL) was stirred under an atmosphere of H<sub>2</sub> at room temperature for 12 h, after which the reaction mixture was filtered and concentrated *in vacuo*. The residue was purified by column chromatography on RP-18 (MeOH-H<sub>2</sub>O = 1.5:1 to 2:1) to afford the intermediate (55.5 mg, 77%). To a solution of above intermediate (55 mg, 0.07 mmol) in dioxane/MeOH (0.75 mL/0.75 mL) was added 1 mL 1M NaOH aq. The reaction was stirred for 12 h at room temperature. After the reaction was completed, the reaction was neutralized to pH = 7 by acetic acid, then filtered and concentrated. The residue was purified by column chromatography on Sephadex TM LH-20 (MeOH-H<sub>2</sub>O = 1:1) to afford **9** (24.8 mg, 75%) as a white solid.  $[\alpha]_D^{20} = +256.9$  (c 0.16, H<sub>2</sub>O). <sup>1</sup>H NMR (400 MHz, D<sub>2</sub>O)  $\delta$  5.15 (d, *J* = 3.7 Hz, 1H), 4.96 (d, *J* = 3.7 Hz, 1H), 4.43 (dd, *J* = 11.1, 3.7 Hz, 1H), 4.27 (d, *J* = 2.1 Hz, 1H), 4.15 (dd, *J* = 11.0, 2.7 Hz, 1H), 4.07 – 3.92 (m, 5H), 3.89 – 3.74 (m, 7H), 2.08 (s, 3H). <sup>13</sup>C NMR (126 MHz, D<sub>2</sub>O)  $\delta$  174.0, 171.3, 97.6, 94.4, 71.9, 70.8, 70.7, 68.9, 68.6, 67.6, 66.0, 64.0, 60.8, 60.5, 54.0, 47.3, 21.6. HRMS (ESI) calcd for C<sub>17</sub>H<sub>29</sub>N<sub>2</sub>O<sub>13</sub> [M-H]<sup>-</sup> 469.1675, found 469.1677.

### Synthesis of core ST<sub>N</sub> antigen (**10**)

**L-Serine 5-azido-4,7,8,9-tetra-O-acetyl-3,5-dideoxy-D-glycero- $\alpha$ -D-galacto-non-2-uloypyranosylonate)-(2 $\rightarrow$ 3)-N-(benzyloxycarbonyl)-O-(2-azido-4-O-benzoyl-2-deoxy-3-O-levulinoyl-2-deoxy- $\alpha$ -D-galactopyranosyl)-benzyl ester (**30**)**

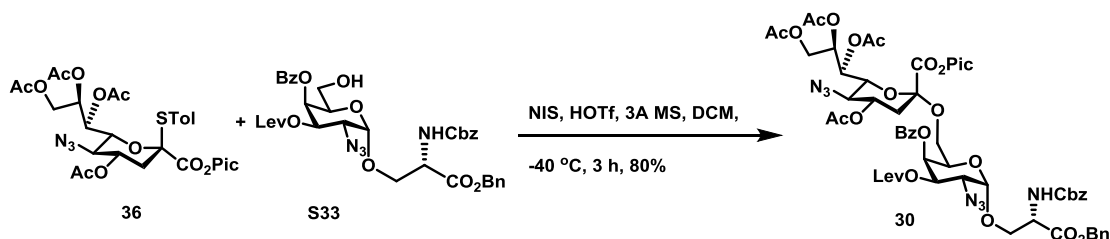

A suspension of donor **36**<sup>18</sup> (122.2 mg, 0.19 mmol), acceptor **S33** (76.4 mg, 0.11 mmol), and activated 3Å MS (200 mg) in anhydrous DCM (4 mL) was stirred at room

temperature for 15 min and was then cooled to  $-40\text{ }^{\circ}\text{C}$ . NIS (100.2 mg, 0.45 mmol) and HOTf (Trifluoromethanesulfonic acid) (16.4  $\mu\text{L}$ , 0.19 mmol) were added successively. The resulting mixture was stirred at  $-40\text{ }^{\circ}\text{C}$  for 3 h, then quenched with  $\text{Et}_3\text{N}$  (1 mL) and filtered. The filtrates were concentrated under vacuum to give a residue, which was purified by flash column chromatography (petroleum ether-ethyl acetate, 6:1 to 4:1) to afford **30** (185.2 mg, 80%) as a white solid.  $[\alpha]_{\text{D}}^{20} = +36.8$  (c 0.17,  $\text{CHCl}_3$ ).  $^1\text{H}$  NMR (400 MHz,  $\text{CDCl}_3$ )  $\delta$  8.54 (s, 1H), 8.00 (d,  $J = 7.6$  Hz, 2H), 7.65 (t,  $J = 6.9$  Hz, 1H), 7.58 (t,  $J = 7.2$  Hz, 1H), 7.44 (t,  $J = 7.5$  Hz, 2H), 7.39 – 7.31 (m, 10H), 7.20 (s, 2H), 6.03 (d,  $J = 8.3$  Hz, 1H), 5.62 (s, 1H), 5.47 (d,  $J = 9.2$  Hz, 1H), 5.37 – 5.04 (m, 8H), 5.04 – 4.96 (m, 1H), 4.92 (d,  $J = 2.4$  Hz, 1H), 4.73 (d,  $J = 13.3$  Hz, 1H), 4.64 (d,  $J = 7.8$  Hz, 1H), 4.25 – 4.06 (m, 5H), 3.89 – 3.78 (m, 2H), 3.64 (dd,  $J = 10.8, 2.3$  Hz, 1H), 3.50 – 3.41 (m, 1H), 3.19 (t,  $J = 10.0$  Hz, 1H), 2.82 – 2.62 (m, 3H), 2.60 – 2.41 (m, 2H), 2.16 (s, 3H), 2.13 (s, 3H), 2.07 (s, 3H), 1.99 (s, 3H), 1.87 (s, 3H), 1.71 (t,  $J = 12.5$  Hz, 1H).  $^{13}\text{C}$  NMR (101 MHz,  $\text{CDCl}_3$ )  $\delta$  206.0, 171.6, 170.7, 169.9, 169.74, 169.65, 169.5, 166.5, 165.4, 156.2, 154.2, 149.2, 137.1, 136.3, 135.2, 133., 129.8, 129.5, 128.7, 128.6, 128.6, 128.2, 128.2, 123.2, 121.2, 99.2(C-1GalN), 98.5, 77.4, 71.7, 70.9, 69.4, 68.7, 68.1, 67.9, 67.8, 67.7, 67.2, 67.1, 62.6, 62.0, 60.0, 57.9, 54.6, 37.9, 37.4, 29.7, 27.9, 20.9, 20.8, 20.7. HRMS (ESI) calcd for  $\text{C}_{59}\text{H}_{65}\text{N}_8\text{O}_{23}$   $[\text{M}+\text{H}]^+$  1253.4157, found 1253.4159.

**5-acetamido-3,5-dideoxy-D-glycero-D-galacto-non-2-ulopyranosylonic acid-(2 $\rightarrow$ 6)-O-[2-(Acetylamino)-2-deoxy- $\alpha$ -D-galactopyranosyl] -L-serine (10)**

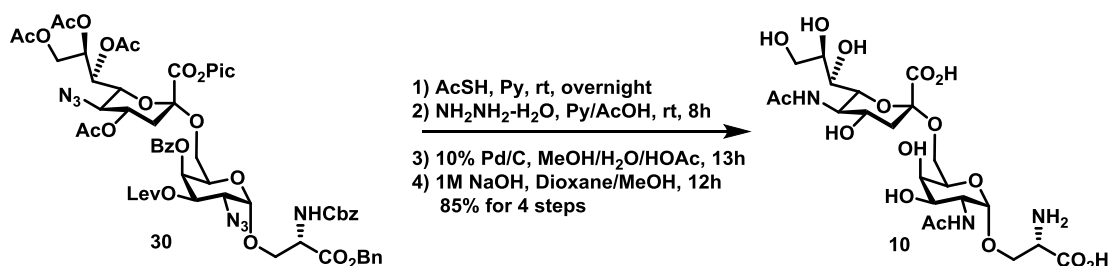

To a solution of compound **30** (180 mg, 0.14 mmol) in pyridine (3 mL) was added AcSH (5.2 mL, 57.45 mmol). The reaction mixture was stirred overnight at room temperature. Then the reaction mixture was concentrated *in vacuo*. The residue



---

was purified by flash chromatography (MeOH/DCM, 1:20) to afford intermediate (184.6 mg, 100%). The above intermediate (184 mg, 0.14 mmol) was dissolved in anhydrous DCM/pyridine/AcOH (1 mL/0.3 mL/0.2 mL), then  $\text{NH}_2\text{NH}_2\cdot\text{H}_2\text{O}$  (0.026 mL, 0.43 mmol) was added at room temperature. The reaction was stirred until TLC-analysis indicated full consumption of the starting material. Then the reaction was quenched with acetone and the mixture was concentrated under vacuum. The products were purified by flash column chromatography (DCM/MeOH, 20:1) to afford the intermediate (151 mg, 89%). A mixture of the above intermediate (144 mg, 0.13 mmol) and Pd/C (288 mg, 10%) in MeOH/ $\text{H}_2\text{O}$ /HOAc (6 mL/0.6 mL/0.06 mL) was stirred under an atmosphere of  $\text{H}_2$  at room temperature for 13 h, after which the reaction mixture was filtered and concentrated *in vacuo* to afford the intermediate. To a solution of above intermediate in dioxane/MeOH (1 mL/1 mL) was added 1 mL 1M NaOH aq. The reaction was stirred for 12 h at room temperature. After the reaction was completed, the reaction was neutralized to pH = 7 by acetic acid, then filtered and concentrated. The residue was purified by column chromatography on Sephadex TM LH-20 (MeOH- $\text{H}_2\text{O}$  =1:1) to afford **10** (72.1 mg, 95%) as a white solid.  $[\alpha]_{\text{D}}^{20} = +73.1$  (c 0.21,  $\text{H}_2\text{O}$ ).  $^1\text{H}$  NMR (400 MHz,  $\text{D}_2\text{O}$ )  $\delta$  4.90 (d,  $J = 3.7$  Hz, 1H), 4.17 (dd,  $J = 11.1, 3.7$  Hz, 1H), 4.12 (dd,  $J = 11.0, 2.6$  Hz, 1H), 4.03 (dd,  $J = 8.2, 3.6$  Hz, 1H), 4.01 – 3.97 (m, 2H), 3.95 – 3.86 (m, 5H), 3.83 (d,  $J = 10.1$  Hz, 1H), 3.75 – 3.62 (m, 4H), 3.58 (dd,  $J = 8.9, 1.2$  Hz, 1H), 2.74 (dd,  $J = 12.4, 4.6$  Hz, 1H), 2.04 (s, 3H), 2.04 (s, 3H), 1.69 (t,  $J = 12.1$  Hz, 1H).  $^{13}\text{C}$  NMR (151 MHz,  $\text{D}_2\text{O}$ )  $\delta$  175.0, 174.7, 173.4, 171.8, 100.3, 98.0, 72.6, 71.8, 69.7, 68.4, 68.2, 67.2, 66.9, 63.9, 62.6, 54.4, 51.8, 49.6, 40.2, 22.00, 21.99. HRMS (ESI) calcd for  $\text{C}_{22}\text{H}_{36}\text{N}_3\text{O}_{16}$   $[\text{M}-\text{H}]^-$  598.2101, found 598.2105.

### Synthesis of core 6 mucin-type *O*-glycan (7)

**L-Serine *O*-(3,4,6-tri-*O*-benzoyl-2-deoxy-2-*N*-2,2,2-tri-chloroethoxycarbonyl- $\beta$ -D-glucopyranosyl)-(1 $\rightarrow$ 6)-*N*-(benzyloxycarbonyl)-*O*-(2-azido-4-*O*-benzoyl-2-deoxy-3-*O*-levulinoyl-2-deoxy- $\alpha$ -D-galactopyranosyl)-benzyl ester (26)**

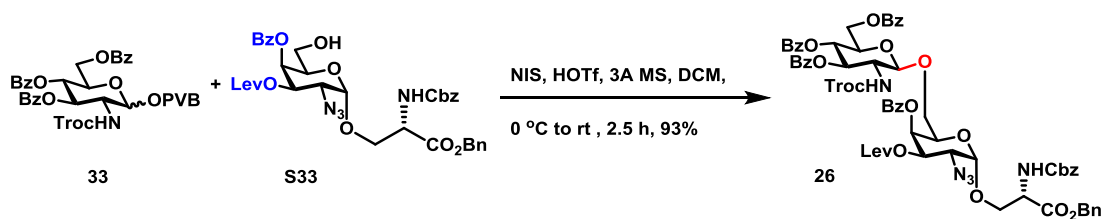

A suspension of donor **33** (111.4 mg, 0.13 mmol), acceptor **S33** (76.4 mg, 0.11 mmol), and activated 3Å MS (200 mg) in anhydrous DCM (3.3 mL) was stirred at room temperature for 15 min and was then cooled to 0 °C. NIS (43.0 mg, 0.19 mmol) and HOTf (Trifluoromethanesulfonic acid) (3 μL, 0.038 mmol) were added successively. The resulting mixture was stirred at room temperature for 2.5 h, then quenched with Et<sub>3</sub>N (1 mL) and filtered. The filtrates were concentrated under vacuum to give a residue, which was purified by flash column chromatography (petroleum ether-ethyl acetate, 3:1 to 2:1) to afford **26** (134.7 mg, 93%) as a white solid.  $[\alpha]_D^{24} = +62.2$  (c 0.30, CHCl<sub>3</sub>). <sup>1</sup>H NMR (400 MHz, CDCl<sub>3</sub>) δ 8.04 – 8.01 (m, 2H), 7.94 – 7.89 (m, 4H), 7.87 (d, *J* = 7.8 Hz, 2H), 7.61 (t, *J* = 7.4 Hz, 1H), 7.49 – 7.44 (m, 6H), 7.40 – 7.27 (m, 15H), 6.03 (t, *J* = 9.0 Hz, 2H), 5.99 (t, *J* = 10.2 Hz, 1H, H-3<sub>GlcN</sub>), 5.60 (d, *J* = 3.3 Hz, 1H, H-4<sub>GalN</sub>), 5.52 (t, *J* = 9.7 Hz, 1H, H-4<sub>GlcN</sub>), 5.35 (dd, *J* = 11.1, 3.3 Hz, 1H, H-3<sub>GalN</sub>), 5.25 (s, 2H), 5.17 (s, 2H), 4.99 (d, *J* = 3.6 Hz, 1H, H-1<sub>GalN</sub>), 4.95 (d, *J* = 8.3 Hz, 1H, H-1<sub>GlcN</sub>), 4.81 (d, *J* = 12.1 Hz, 1H), 4.63 – 4.59 (m, 1H), 4.57 (d, *J* = 12.1 Hz, 1H), 4.45 (dd, *J* = 12.1, 3.2 Hz, 1H), 4.30 (dd, *J* = 12.2, 5.1 Hz, 1H), 4.22 (dd, *J* = 7.6, 4.3 Hz, 1H), 4.14 (dd, *J* = 10.6, 3.6 Hz, 1H), 4.10 (dd, *J* = 10.7, 3.4 Hz, 1H), 4.02 – 3.96 (m, 1H), 3.92 (dd, *J* = 10.7, 4.4 Hz, 1H), 3.69 – 3.60 (m, 3H, H-2<sub>GalN</sub>, H-2<sub>GlcN</sub>), 2.81 – 2.75 (m, 1H, CH<sub>2</sub>-Lev), 2.71 – 2.64 (m, 1H, CH<sub>2</sub>-Lev), 2.60 – 2.54 (m, 1H, CH<sub>2</sub>-Lev), 2.49 – 2.41 (m, 1H, CH<sub>2</sub>-Lev), 2.13 (s, 3H, CH<sub>3</sub>-Lev). <sup>13</sup>C NMR (151 MHz, CDCl<sub>3</sub>) δ 206.2, 171.6, 169.5, 166.1, 166.0, 165.4, 165.3, 156.1, 154.1, 136.1, 135.1, 133.8, 133.44, 133.41, 133.1, 129.9, 129.85, 129.76, 129.67, 129.57, 129.1, 129.0, 128.9, 128.8, 128.74, 128.72, 128.69, 128.64, 128.57, 128.49, 128.42, 128.35, 128.2, 100.0 (C-1<sub>GlcN</sub>), 98.7 (C-1<sub>GalN</sub>), 95.6, 74.3, 71.9, 71.6, 70.0, 69.0, 68.8, 68.51, 68.50, 68.1, 68.0, 67.4, 63.0, 57.7, 57.0, 54.5, 37.9, 29.8, 27.9. HRMS (ESI) calcd for C<sub>66</sub>H<sub>62</sub>Cl<sub>3</sub>N<sub>5</sub>O<sub>21</sub>Na [M+Na]<sup>+</sup> 1388.2901, found 1388.2899.

***O*-[2-(Acetylamino)-2-deoxy- $\beta$ -D-glucopyranosyl]-(1 $\rightarrow$ 6)-*O*-[2-(Acetylamino)-2-deoxy- $\alpha$ -D-galactopyranosyl]- L-serine (**7**)**

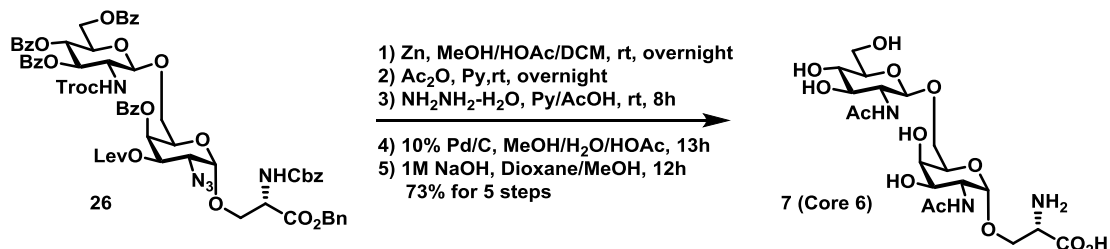

To a solution of compound **26** (125 mg, 0.09 mmol) in MeOH/AcOH/DCM (13 mL/6.5 mL/6.5 mL) was added Zn powder (1.2 g, 18.28 mmol). The reaction mixture was stirred overnight at room temperature. Then the reaction mixture was filtered, the solvent was removed under vacuum to give the intermediate. The above intermediate was then dissolved in anhydrous pyridine (4.6 mL), and Ac<sub>2</sub>O (0.43 mL, 4.57 mmol) was added slowly. The reaction mixture was stirred overnight at room temperature. Then the reaction mixture was concentrated in vacuo. The residue was purified by flash chromatography (MeOH/DCM, 1:30) to afford intermediate (110.3 mg, 97%). The above intermediate (100 mg, 0.09 mmol) was dissolved in anhydrous DCM/pyridine/AcOH (1 mL/0.3 mL/0.2 mL), then NH<sub>2</sub>NH<sub>2</sub>·H<sub>2</sub>O (0.016 mL, 0.26 mmol) was added at room temperature. The reaction was stirred until TLC-analysis indicated full consumption of the starting material. Then the reaction was quenched with acetone and the mixture was concentrated under vacuum. The products were purified by flash column chromatography (DCM/MeOH, 15:1) to afford the intermediate (100 mg, 99%). A mixture of the above intermediate (100 mg, 0.09 mmol) and Pd/C (206 mg, 10%) in MeOH/H<sub>2</sub>O/HOAc (5 mL/0.5 mL/0.05 mL) was stirred under an atmosphere of H<sub>2</sub> at room temperature for 12 h, after which the reaction mixture was filtered and concentrated in vacuo. The residue was purified by column chromatography on RP-18 (MeOH-H<sub>2</sub>O = 3:1) to afford the intermediate (68.8 mg, 83%). To a solution of above intermediate (68 mg, 0.07 mmol) in Dioxane/MeOH (1.5 mL/1.5 mL) was added 1.5 mL 1M NaOH aq. The reaction was stirred for 12 h at room temperature. After the reaction was completed, the reaction was neutralized to

pH = 7 by acetic acid, then filtered and concentrated. The residue was purified by column chromatography on Sephadex TM LH-20 (MeOH-H<sub>2</sub>O =1:1) to afford **7** (33.8 mg, 90%) as a white solid.  $[\alpha]_D^{20} = +110.8$  (c 0.10, H<sub>2</sub>O). <sup>1</sup>H NMR (600 MHz, D<sub>2</sub>O)  $\delta$  4.87 (d,  $J = 3.5$  Hz, 1H), 4.54 (d,  $J = 8.5$  Hz, 1H), 4.16 (dd,  $J = 11.0, 3.5$  Hz, 1H), 4.07 (dd,  $J = 10.7, 3.0$  Hz, 1H), 4.04 – 4.00 (m, 2H), 3.98 – 3.95 (m, 2H), 3.94 – 3.87 (m, 3H), 3.77 – 3.72 (m, 2H), 3.72 – 3.67 (m, 1H), 3.54 (t,  $J = 9.4$  Hz, 1H), 3.48 – 3.41 (m, 2H), 2.04 (s, 3H), 2.03 (s, 3H). <sup>13</sup>C NMR (151 MHz, D<sub>2</sub>O)  $\delta$  174.7, 174.5, 171.6, 101.5, 98.0, 75.8, 73.6, 69.92, 69.86, 69.8, 68.4, 67.2, 66.5, 60.6, 55.5, 54.4, 49.5, 22.2, 22.0. HRMS (ESI) calcd for C<sub>19</sub>H<sub>32</sub>N<sub>3</sub>O<sub>13</sub> [M-H]<sup>-</sup> 510.1941, found 510.1945.

### Synthesis of core 7 mucin-type O-glycan (**8**)

**L-Serine**      *O*-(2-azido-3,4-di-*O*-benzoyl-6-*O*-benzyl-2-deoxy- $\alpha$ -D-galactopyranosyl)-(1 $\rightarrow$ 6)-*N*-(benzyloxycarbonyl)-*O*-(2-azido-4-*O*-benzoyl-2-deoxy-3-*O*-levulinoyl-2-deoxy- $\alpha$ -D-galactopyranosyl)-benzyl ester (**27**)

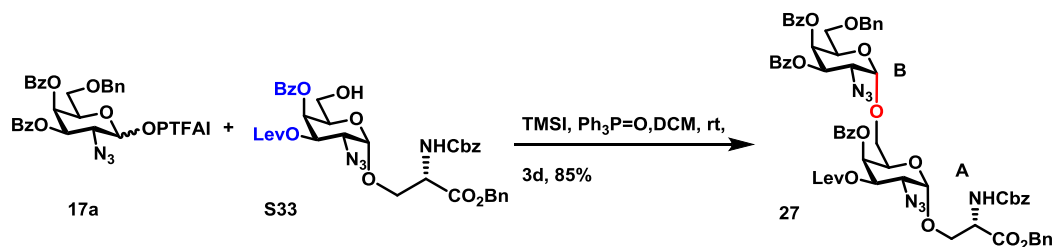

PTFAI donor **17a** (180.2 mg, 0.27 mmol) was co-evaporated with anhydrous toluene for three times. Then PTFAI donor with Ph<sub>3</sub>P=O (446.1 mg, 1.60 mmol) were dissolved in new distilled DCM (1.8 mL) and stirred over fresh-dried 3Å molecular sieves (300 mg) under argon at room temperature for 15 min. TMSI (38  $\mu$ L, 0.27 mmol) was added dropwise subsequently. After the mixture was stirred for 1h, acceptor **S33** (128 mg, 0.18 mmol) was added. The reaction was stirred at room temperature for 3d. Upon completion, the solution was diluted with EtOAc and the reaction was quenched with saturated Na<sub>2</sub>S<sub>2</sub>O<sub>3</sub>. The organic phase was washed with water and brine, dried over anhydrous Na<sub>2</sub>SO<sub>4</sub>, filtered and concentrated in vacuo. The products were purified by flash column chromatography (PE-EA=3:1) to afford

**27** (182.7 mg, 85%) as a white solid.  $[\alpha]_D^{25} = +205.5$  (c 0.11, CHCl<sub>3</sub>). <sup>1</sup>H NMR (400 MHz, CDCl<sub>3</sub>) δ 8.07 – 8.02 (m, 2H, Ar), 7.96 – 7.90 (m, 2H, Ar), 7.88 – 7.82 (m, 2H, Ar), 7.59 (q, *J* = 7.8 Hz, 2H, Ar), 7.52 – 7.24 (m, 20H, Ar), 7.17 – 7.12 (m, 2H, Ar), 5.99 (d, *J* = 8.6 Hz, 1H), 5.89 (d, *J* = 3.2 Hz, 1H, H-4<sub>B</sub>), 5.70 (dd, *J* = 11.0, 3.2 Hz, 1H, H-3<sub>B</sub>), 5.61 (d, *J* = 3.3 Hz, 1H, H-4<sub>A</sub>), 5.36 (dd, *J* = 11.1, 3.2 Hz, 1H, H-3<sub>A</sub>), 5.24 (q, *J* = 10.2, 8.5 Hz, 2H), 5.16 (q, *J* = 12.0, 10.4 Hz, 2H), 5.02 (t, *J* = 2.7 Hz, 2H, H-1<sub>A</sub>, H-1<sub>B</sub>), 4.76 – 4.69 (m, 1H), 4.46 (d, *J* = 12.1 Hz, 1H), 4.42 (d, *J* = 6.7 Hz, 1H), 4.33 (d, *J* = 12.1 Hz, 1H), 4.22 (dd, *J* = 7.8, 4.4 Hz, 1H), 4.15 (dd, *J* = 10.4, 4.6 Hz, 1H), 4.09 (dd, *J* = 10.3, 3.7 Hz, 1H), 3.92 (dd, *J* = 11.0, 3.4 Hz, 1H), 3.86 (dd, *J* = 10.5, 7.7 Hz, 1H), 3.69 (dd, *J* = 11.1, 3.6 Hz, 1H), 3.58 (dd, *J* = 10.3, 4.1 Hz, 1H), 3.51 (q, *J* = 9.7, 8.1 Hz, 2H), 2.82 – 2.73 (m, 1H, CH<sub>2</sub>-Lev), 2.72 – 2.63 (m, 1H, CH<sub>2</sub>-Lev), 2.61 – 2.52 (m, 1H, CH<sub>2</sub>-Lev), 2.50 – 2.41 (m, 1H, CH<sub>2</sub>-Lev), 2.12 (s, 3H, CH<sub>3</sub>-Lev). <sup>13</sup>C NMR (101 MHz, CDCl<sub>3</sub>) δ 206.2, 171.6, 169.9, 165.6, 165.45, 165.37, 156.2, 137.6, 136.3, 135.3, 133.8, 133.5, 133.4, 129.9, 129.8, 129.5, 129.2, 129.1, 128.79, 128.77, 128.72, 128.63, 128.61, 128.4, 128.3, 128.2, 127.75, 127.69, 99.0, 97.8, 73.4, 69.3, 69.1, 68.9, 68.7, 68.55, 68.50, 68.02, 67.97, 67.8, 67.3, 66.5, 58.4, 57.9, 54.3, 37.9, 29.8, 27.9. HRMS (ESI) calcd for C<sub>63</sub>H<sub>61</sub>N<sub>7</sub>O<sub>18</sub>Na [M+Na]<sup>+</sup> 1226.3971, found 1226.3970.

***O*-[2-(Acetylamino)-2-deoxy- $\alpha$ -D-galactopyranosyl]-(1 $\rightarrow$ 6)-*O*-[2-(Acetylamino)-2-deoxy- $\alpha$ -D-galactopyranosyl]-L-serine (**8**)**

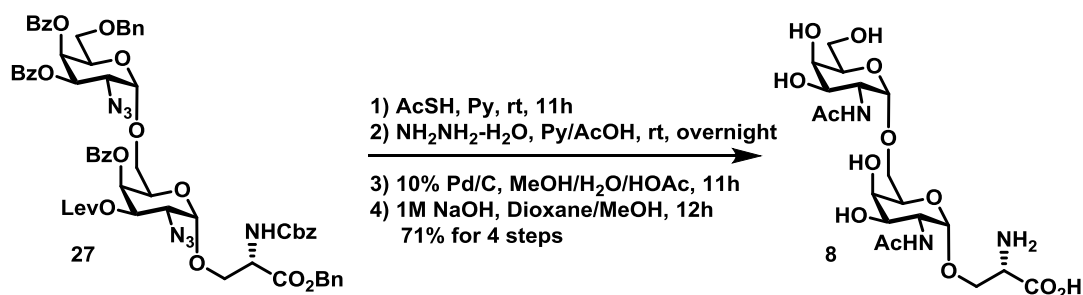

To a solution of compound **27** (180 mg, 0.15 mmol) in pyridine (3 mL) was added AcSH (5.42 mL, 59.79 mmol). The reaction mixture was stirred overnight at room temperature. Then the reaction mixture was concentrated *in vacuo*. The residue

---

was purified by flash chromatography (MeOH/DCM, 1:30) to afford intermediate (184.8 mg, 100%). The above intermediate (183 mg, 0.15 mmol) was dissolved in anhydrous DCM/pyridine/AcOH (1 mL/0.3 mL/0.2 mL), then  $\text{NH}_2\text{NH}_2 \cdot \text{H}_2\text{O}$  (80%, 0.027 mL, 0.44 mmol) was added at room temperature. The reaction was stirred until TLC-analysis indicated full consumption of the starting material. Then the reaction was quenched with acetone and the mixture was concentrated under vacuum. The products were purified by flash column chromatography (DCM/MeOH, 30:1) to afford the intermediate (168.5 mg, 100%). A mixture of the above intermediate (168 mg, 0.15 mmol) and Pd/C (524 mg, 10%) in MeOH/H<sub>2</sub>O/HOAc (8 mL/0.8 mL/0.08 mL) was stirred under an atmosphere of H<sub>2</sub> at room temperature for 11 h, after which the reaction mixture was filtered and concentrated *in vacuo*. The residue was purified by column chromatography on RP-18 (MeOH-H<sub>2</sub>O = 1.5:1) to afford the intermediate (107.8 mg, 89%). To a solution of above intermediate (106 mg, 0.013 mmol) in dioxane/MeOH (1 mL/1 mL) was added 2 mL 1M NaOH aq. The reaction was stirred for 12 h at room temperature. After the reaction was completed, the reaction was neutralized to pH = 7 by acetic acid, then filtered and concentrated. The residue was purified by column chromatography on Sephadex TM LH-20 (MeOH-H<sub>2</sub>O = 1:1) to afford **8** (53.3 mg, 81%) as a white solid.  $[\alpha]_{\text{D}}^{20} = +149.3$  (c 0.21, H<sub>2</sub>O). <sup>1</sup>H NMR (400 MHz, D<sub>2</sub>O)  $\delta$  4.96 (d, *J* = 3.6 Hz, 1H), 4.91 (d, *J* = 3.6 Hz, 1H), 4.24 – 4.07 (m, 4H), 4.07 – 3.96 (m, 4H), 3.96 – 3.81 (m, 4H), 3.80 – 3.68 (m, 3H), 2.05 (s, 6H). <sup>13</sup>C NMR (151 MHz, D<sub>2</sub>O)  $\delta$  174.64, 174.57, 171.4, 97.9, 97.1, 71.1, 69.0, 68.5, 68.5, 67.6, 67.5, 66.5, 66.3, 61.2, 54.5, 49.8, 49.5, 22.0, 21.9. HRMS (ESI) calcd for C<sub>19</sub>H<sub>32</sub>N<sub>3</sub>O<sub>13</sub> [M-H]<sup>-</sup> 510.1941, found 510.1939.

### Synthesis of core 2 mucin-type *O*-glycan (**3**)

**L-Serine *O*-(3,4,6-tri-*O*-benzoyl-2-deoxy-2-*N*-2,2,2-tri-chloroethoxycarbonyl- $\beta$ -D-glucopyranosyl)-(1 $\rightarrow$ 6)-*N*-(benzyloxycarbonyl)-*O*-(2-azido-4-*O*-benzoyl-2-deoxy- $\alpha$ -D-galactopyranosyl)-(3 $\rightarrow$ 1)-*O*-(3,4,6-tri-*O*-benzyl-2-*O*-benzoyl- $\beta$ -D-galactopyranosyl)-benzyl ester (**28**)**

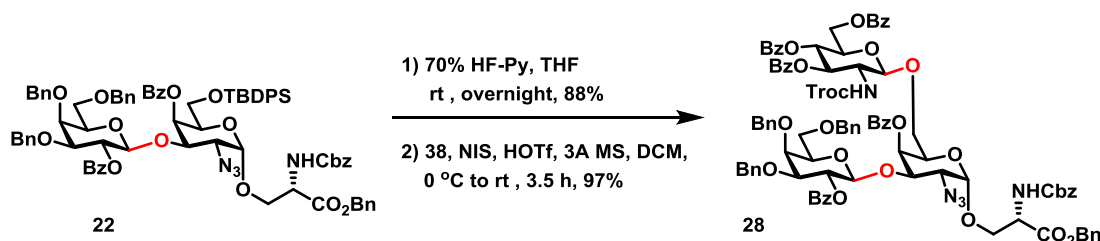

Compound **22** (358 mg, 0.26 mmol) was then dissolved in anhydrous THF (1.0 mL), and HF/pyridine (70%, 0.23 mL, 2.56 mmol) was added dropwise. The resulting mixture was stirred overnight at room temperature, the reaction mixture was then quenched with Et<sub>3</sub>N, diluted with ethyl acetate and washed with saturated NaHCO<sub>3</sub> solution and brine. The organic layer was concentrated under vacuum. The residue was purified by column chromatography on silica gel (PE:EA = 2:1) to afford the acceptor (262.4 mg, 88%,) as a white solid. A suspension of donor **33** (115.8 mg, 0.13 mmol), acceptor (127.9 mg, 0.11 mmol), and activated 3 Å MS (250 mg) in anhydrous DCM (3.3 mL) was stirred at room temperature for 15 min and was then cooled to 0 °C. NIS (44.7 mg, 0.20 mmol) and HOTf (Trifluoromethanesulfonic acid) (5 μL, 0.053 mmol) were added successively. The resulting mixture was stirred at room temperature for 3.5 h, then quenched with Et<sub>3</sub>N (1 mL) and filtered. The filtrates were concentrated under vacuum to give a residue, which was purified by flash column chromatography (petroleum ether-ethyl acetate, 3:1) to afford **28** (193.8 mg, 97%) as a white solid.  $[\alpha]_D^{25} = +78.3$  (c 0.14, CHCl<sub>3</sub>). <sup>1</sup>H NMR (400 MHz, CDCl<sub>3</sub>) δ 7.99 (t, *J* = 8.2 Hz, 4H, Ar), 7.94 (d, *J* = 7.7 Hz, 2H, Ar), 7.89 (d, *J* = 7.9 Hz, 2H, Ar), 7.86 (d, *J* = 7.9 Hz, 2H, Ar), 7.52 (q, *J* = 7.0 Hz, 2H, Ar), 7.46 – 7.37 (m, 8H, Ar), 7.36 – 7.31 (m, 7H, Ar), 7.28 (h, *J* = 7.9, 6.9 Hz, 15H, Ar), 7.21 – 7.19 (m, 3H, Ar), 7.17 – 7.14 (m, 2H, Ar), 7.11 (d, *J* = 5.5 Hz, 3H, Ar), 6.06 – 6.00 (m, 2H, H-3<sub>GlcN</sub>, H-4<sub>GalN</sub>), 5.98 (d, *J* = 7.7 Hz, 1H), 5.57 – 5.51 (m, 3H, H-2<sub>Gal</sub>, H-4<sub>GlcN</sub>, H-3<sub>GalN</sub>), 5.16 – 5.08 (m, 5H, CH<sub>2</sub>-Cbz, CH<sub>2</sub>-Bn), 4.96 (d, *J* = 8.2 Hz, 1H, H-1<sub>GlcN</sub>), 4.87 (d, *J* = 11.9 Hz, 1H, CH<sub>2</sub>-Bn), 4.81 (d, *J* = 3.8 Hz, 1H, H-1<sub>GalN</sub>), 4.70 (d, *J* = 12.2 Hz, 1H), 4.68 (d, *J* = 7.9 Hz, 1H, H-1<sub>Gal</sub>), 4.58 (d, *J* = 12.5 Hz, 1H, CH<sub>2</sub>-Bn), 4.56 – 4.51 (m, 2H), 4.49 (d, *J* = 11.8 Hz, 1H, CH<sub>2</sub>-Bn), 4.43 (dd, *J* = 12.0, 5.0 Hz, 2H, CH<sub>2</sub>-Bn), 4.38 (dd, *J* = 12.1, 5.4 Hz, 1H), 4.34 (d, *J* = 11.5 Hz, 1H), 4.16 (d, *J* = 10.8 Hz, 1H), 4.09 – 4.03 (m, 3H),

4.00 (dd,  $J = 10.7, 3.4$  Hz, 1H), 3.94 (d,  $J = 2.7$  Hz, 1H), 3.91 (dd,  $J = 10.6, 3.7$  Hz, 1H), 3.65 – 3.58 (m, 4H, H-2<sub>GlcN</sub>), 3.57 – 3.50 (m, 2H, H-2<sub>GalN</sub>), 3.46 (t,  $J = 9.9$  Hz, 1H). <sup>13</sup>C NMR (151 MHz, CDCl<sub>3</sub>)  $\delta$  169.6, 166.1, 165.93, 165.89, 165.3, 165.2, 155.9, 154.0, 138.6, 137.8, 137.6, 136.0, 135.0, 133.4, 133.3, 133.0, 132.8, 130.2, 129.9, 129.8, 129.81, 129.79, 129.73, 129.6, 129.0, 128.8, 128.7, 128.64, 128.57, 128.49, 128.47, 128.43, 128.40, 128.36, 128.35, 128.29, 128.24, 128.16, 128.09, 127.98, 127.8, 127.6, 127.5, 127.2, 102.2 (C-1<sub>Gal</sub>), 100.2 (C-1<sub>GlcN</sub>), 98.4 (C-1<sub>GalN</sub>), 95.4, 79.4, 74.8, 74.2, 73.6, 73.5, 72.4, 71.8, 71.6, 71.5, 71.4, 70.8, 70.0, 69.9, 69.7, 68.2, 68.1, 67.7, 67.3, 63.2, 59.1, 57.1, 54.2. HRMS (ESI) calcd for C<sub>95</sub>H<sub>88</sub>Cl<sub>3</sub>N<sub>5</sub>O<sub>25</sub>Na [M+Na]<sup>+</sup> 1826.4726, found 1826.4731.

***O*-[2-(Acetylamino)-2-deoxy- $\beta$ -D-galactopyranosyl)-(1 $\rightarrow$ 6)-*O*-[2-(Acetylamino)-2-deoxy- $\alpha$ -D-galactopyranosyl)]-(3 $\rightarrow$ 1)-*O*- $\beta$ -D-galactopyranosyl)- L-serine (3)**

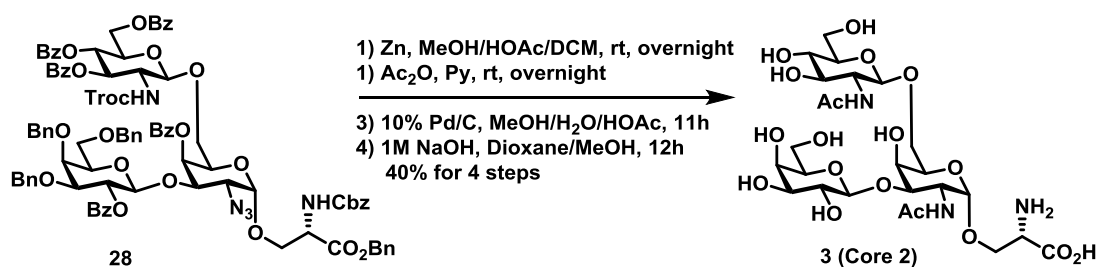

To a solution of compound **28** (180 mg, 0.10 mmol) in MeOH/AcOH/DCM (14 mL/7 mL/7 mL) was added Zn powder (652 mg, 9.97 mmol). The reaction mixture was stirred overnight at room temperature. Then the reaction mixture was filtered, the solvent was removed under vacuum to give the intermediate. The above intermediate was then dissolved in anhydrous MeOH (28 mL), and Ac<sub>2</sub>O (0.47 mL, 4.98 mmol) was added slowly. The reaction mixture was stirred overnight at room temperature. Then the reaction mixture was concentrated in vacuo. The residue was purified by flash chromatography (MeOH/DCM, 1:30) to afford intermediate (117.3 mg, 70%). A mixture of the above intermediate (115 mg, 0.07 mmol) and Pd/C (403 mg, 10%) in MeOH/H<sub>2</sub>O/HOAc (5 mL/0.5 mL/0.05 mL) was stirred under an atmosphere of H<sub>2</sub> at room temperature for 12 h, after which the reaction mixture was filtered and concentrated *in vacuo*. The residue was purified by column chromatography on RP-18



(MeOH-H<sub>2</sub>O = 2:1 to 3:1) to afford the intermediate (56.7 mg, 70%). To a solution of above intermediate (55 mg, 0.05 mmol) in Dioxane/MeOH (1 mL/1 mL) was added 1 mL 1M NaOH aq. The reaction was stirred for 12 h at room temperature. After the reaction was completed, the reaction was neutralized to pH = 7 by acetic acid, then filtered and concentrated. The residue was purified by column chromatography on Sephadex TM LH-20 (MeOH-H<sub>2</sub>O =1:1) to afford **3** (25.3 mg, 82%) as a white solid.  $[\alpha]_D^{20} = +32.0$  (c 0.10, H<sub>2</sub>O). <sup>1</sup>H NMR (400 MHz, D<sub>2</sub>O)  $\delta$  4.85 (d, *J* = 3.7 Hz, 1H), 4.51 (d, *J* = 8.4 Hz, 1H), 4.43 (d, *J* = 7.7 Hz, 1H), 4.31 (dd, *J* = 11.1, 3.6 Hz, 1H), 4.19 (d, *J* = 2.6 Hz, 1H), 4.08 – 4.01 (m, 3H), 3.98 (dd, *J* = 10.3, 2.0 Hz, 1H), 3.92 – 3.83 (m, 4H), 3.77 – 3.66 (m, 5H), 3.63 – 3.56 (m, 2H), 3.55 – 3.40 (m, 4H), 2.01 (s, 3H), 1.99 (s, 3H). <sup>13</sup>C NMR (126 MHz, D<sub>2</sub>O)  $\delta$  174.21, 174.09, 104.14, 101.12, 97.66, 75.89, 75.39, 74.49, 73.23, 72.00, 70.11, 69.59, 69.43, 69.32, 68.37, 68.09, 66.53, 60.52, 60.17, 55.05, 54.09, 47.86, 21.78, 21.61. HRMS (ESI) calcd for C<sub>25</sub>H<sub>42</sub>N<sub>3</sub>O<sub>18</sub> [M-H]<sup>-</sup> 672.2469, found 672.2475.

### Synthesis of core 4 mucin-type *O*-glycan (**5**)

**L-Serine** *O*-(3,4,6-tri-*O*-benzoyl-2-deoxy-2-*N*-2,2,2-trichloroethoxycarbonyl- $\beta$ -D-glucopyranosyl)-(1 $\rightarrow$ 6)-*N*-(benzyloxycarbonyl)-*O*-(2-azido-4-*O*-benzoyl-2-deoxy- $\alpha$ -D-galactopyranosyl)-(3 $\rightarrow$ 1)-*O*-(3,4,6-tri-*O*-benzoyl-2-deoxy-2-*N*-2,2,2-trichloroethoxycarbonyl- $\beta$ -D-glucopyranosyl)-benzyl ester (**29**)

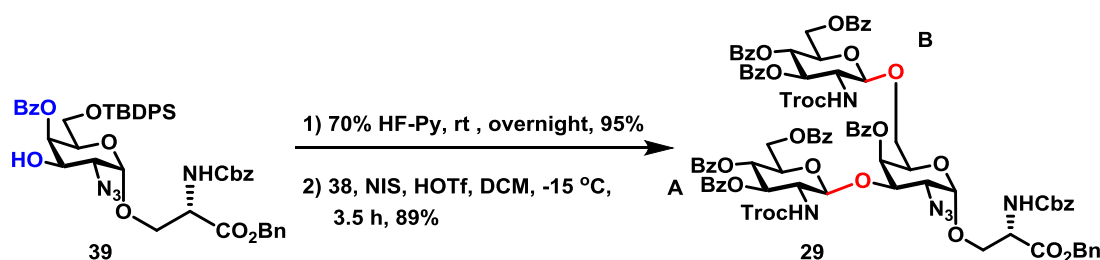

Compound **39** (428 mg, 0.50 mmol) was dissolved in anhydrous THF (1.6 mL), and HF/pyridine (70%, 0.45 mL, 4.98 mmol) was added dropwise. The resulting mixture was stirred overnight at room temperature, the reaction mixture was then quenched with Et<sub>3</sub>N, diluted with ethyl acetate and washed with saturated NaHCO<sub>3</sub> solution and brine. The organic layer was concentrated under vacuum. The residue

---

was purified by column chromatography on silica gel (PE:EA = 2:1) to afford the acceptor (292.6 mg, 95%,) as a white solid. A suspension of donor **33** (211.0 mg, 0.24 mmol), acceptor (60.0 mg, 0.097 mmol), and activated 3 Å MS (300 mg) in anhydrous DCM (2.9 mL) was stirred at room temperature for 15 min and was then cooled to -15 °C. NIS (217.5 mg, 0.97 mmol) and HOTf (Trifluoromethanesulfonic acid) (21 µL, 0.24 mmol) were added successively. The resulting mixture was stirred at -15 °C for 3.5 h, then quenched with Et<sub>3</sub>N (3 mL) and filtered. The filtrates were concentrated under vacuum to give a residue, which was purified by flash column chromatography (petroleum ether-ethyl acetate, 6:1 to 5:1) to afford **29** (165.3 mg, 89%) as a white solid.  $[\alpha]_D^{24} = +47.1$  (c 0.16, CHCl<sub>3</sub>). <sup>1</sup>H NMR (400 MHz, CDCl<sub>3</sub>) δ 8.03 – 7.85 (m, 16H, Ar), 7.56 – 7.45 (m, 7H, Ar), 7.43 – 7.29 (m, 22H, Ar), 6.10 (d, *J* = 9.1 Hz, 3H), 5.83 (t, *J* = 10.3 Hz, 1H), 5.71 (s, 1H, H-4<sub>GalN</sub>), 5.60 (t, *J* = 9.6 Hz, 2H), 5.44 (d, *J* = 8.9 Hz, 1H), 5.28 (s, 2H), 5.20 (s, 2H), 5.04 (t, *J* = 9.5 Hz, 2H), 4.96 (s, 1H, H-1<sub>GalN</sub>), 4.79 (d, *J* = 12.1 Hz, 1H), 4.71 – 4.64 (m, 2H), 4.60 (d, *J* = 11.1 Hz, 3H), 4.50 (d, *J* = 10.5 Hz, 2H), 4.40 (dd, *J* = 12.2, 5.2 Hz, 1H), 4.22 – 4.03 (m, 7H, H-3<sub>GalN</sub>), 3.92 – 3.65 (m, 3H, H-2<sub>GalN</sub>, H-2<sub>A</sub>, H-2<sub>B</sub>), 3.51 (t, *J* = 10.0 Hz, 1H). <sup>13</sup>C NMR (151 MHz, CDCl<sub>3</sub>) δ 169.7, 166.2, 166.12, 166.06, 165.96, 165.33, 165.28, 165.0, 156.0, 154.1, 154.0, 136.0, 135.1, 133.5, 133.4, 133.3, 133.1, 132.9, 129.88, 129.85, 129.78, 129.71, 129.69, 129.60, 129.5, 129.4, 128.9, 128.81, 128.78, 128.73, 128.70, 128.66, 128.62, 128.59, 128.46, 128.42, 128.37, 128.31, 128.2, 101.5, 100.2, 98.2, 95.5, 95.2, 76.0, 74.4, 74.2, 72.1, 72.0, 71.93, 71.85, 71.5, 70.1, 69.7, 69.4, 69.0, 68.2, 67.8, 67.3, 63.2, 62.4, 59.2, 57.1, 56.7, 54.3. MS (Maldi-TOF) calcd for C<sub>91</sub>H<sub>80</sub>N<sub>6</sub>O<sub>28</sub>Cl<sub>6</sub>Na [M+Na]<sup>+</sup> 1937.3049, found 1937.3041.

***O*-[2-(Acetylamino)-2-deoxy-β-D-glucopyranosyl)-(1→6)-*O*-[2-(Acetylamino)-2-deoxy-α-D-galactopyranosyl)]-(3→1)-*O*-[2-(Acetylamino)-2-deoxy-β-D-glucopyranosyl)]- L-serine (5)**

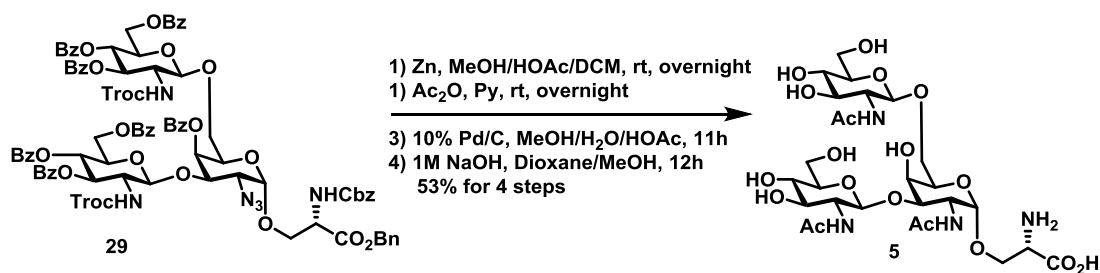

To a solution of compound **29** (160 mg, 0.08 mmol) in MeOH/AcOH/DCM (12 mL/6 mL/6 mL) was added Zn powder (1.64g, 25.02 mmol). The reaction mixture was stirred overnight at room temperature. Then the reaction mixture was filtered, the solvent was removed under vacuum to give the intermediate. The above intermediate was then dissolved in anhydrous Py (2 mL), and Ac<sub>2</sub>O (0.59 mL, 6.26 mmol) was added slowly. The reaction mixture was stirred overnight at room temperature. Then the reaction mixture was concentrated *in vacuo*. The residue was purified by flash chromatography (MeOH/DCM, 1:30) to afford intermediate (120.7 mg, 87%). A mixture of the above intermediate (120 mg, 0.07 mmol) and Pd/C (170 mg, 10%) in MeOH/H<sub>2</sub>O/HOAc (8 mL/0.8 mL/0.08 mL) was stirred under an atmosphere of H<sub>2</sub> at room temperature for 12 h, after which the reaction mixture was filtered and concentrated *in vacuo* afford the intermediate. To a solution of above intermediate in Dioxane/MeOH (2 mL/2 mL) was added 2 mL 1M NaOH aq. The reaction was stirred for 12 h at room temperature. After the reaction was completed, the reaction was neutralized to pH = 7 by acetic acid, then filtered and concentrated. The residue was purified by column chromatography on Sephadex TM LH-20 (MeOH-H<sub>2</sub>O =1:1) to afford **5** (31.6 mg, 60% for two steps) as a white solid.  $[\alpha]_{\text{D}}^{20} = +9.6$  (c 0.15, H<sub>2</sub>O). <sup>1</sup>H NMR (400 MHz, D<sub>2</sub>O)  $\delta$  4.85 (d, *J* = 3.6 Hz, 1H), 4.60 (d, *J* = 8.4 Hz, 1H), 4.55 (d, *J* = 8.4 Hz, 1H), 4.26 (dd, *J* = 11.0, 3.5 Hz, 1H), 4.21 (s, 1H), 4.14 – 4.05 (m, 2H), 4.04 – 3.99 (m, 1H), 3.97 – 3.83 (m, 4H), 3.80 – 3.66 (m, 6H), 3.59 – 3.51 (m, 2H), 3.51 – 3.40 (m, 4H), 2.05 (s, 6H), 2.02 (s, 3H). <sup>13</sup>C NMR (151 MHz, D<sub>2</sub>O)  $\delta$  174.4, 174.4, 173.7, 102.4, 101.5, 97.9, 76.0, 75.8, 75.6, 73.8, 73.4, 70.9, 70.1, 70.0, 69.9, 69.7, 69.5, 68.9, 60.6, 60.4, 55.51, 55.47, 48.2, 22.23, 22.16, 22.1. HRMS (ESI) calcd for C<sub>27</sub>H<sub>45</sub>N<sub>4</sub>O<sub>18</sub> [M-H]<sup>-</sup> 713.2734, found 713.2734.

## Synthesis of 2,6 STF antigen (11)

**L-Serine 5-azido-4,7,8,9-tetra-*O*-acetyl-3,5-dideoxy-D-glycero- $\alpha$ -D-galacto-non-2-uloypyranosylonate)-(2 $\rightarrow$ 3)-*N*-(benzyloxycarbonyl)-*O*-(2-azido-4-*O*-benzoyl-2-deoxy-3-*O*-levulinoyl-2-deoxy- $\alpha$ -D-galactopyranosyl)-(3 $\rightarrow$ 1)-*O*-(3,4,6-tri-*O*-benzyl-2-*O*-benzoyl- $\beta$ -D-galactopyranosyl)-benzyl ester (31)**

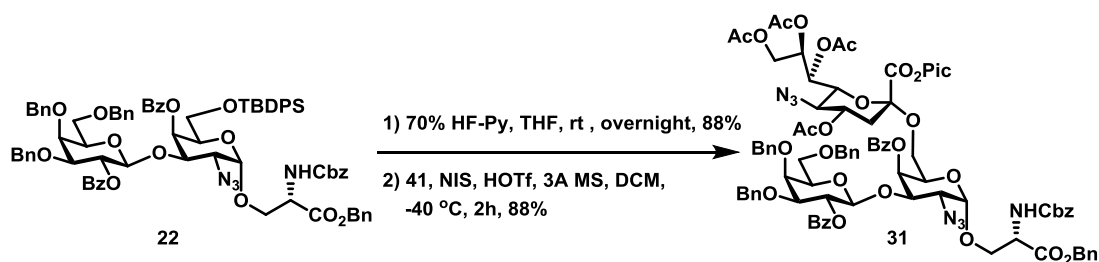

Compound **22** (358 mg, 0.26 mmol) was dissolved in anhydrous THF (1.0 mL), and HF/pyridine (70%, 0.23 mL, 2.56 mmol) was added dropwise. The resulting mixture was stirred overnight at room temperature, the reaction mixture was then quenched with Et<sub>3</sub>N, diluted with ethyl acetate and washed with saturated NaHCO<sub>3</sub> solution and brine. The organic layer was concentrated under vacuum. The residue was purified by column chromatography on silica gel (PE:EA = 2:1) to afford the acceptor (262.4 mg, 88%,) as a white foam. A suspension of donor **36** (112 mg, 0.17 mmol), acceptor (79 mg, 0.07 mmol), and activated 3 Å MS (200 mg) in anhydrous DCM (3.4 mL) was stirred at room temperature for 15 min and was then cooled to -40 °C. NIS (91.8 mg, 0.41 mmol) and HOTf (Trifluoromethanesulfonic acid) (15  $\mu$ L, 0.17 mmol) were added successively. The resulting mixture was stirred at -40 °C for 2 h, then quenched with Et<sub>3</sub>N (1 mL) and filtered. The filtrates were concentrated under vacuum to give a residue, which was purified by flash column chromatography (petroleum ether-ethyl acetate, 1.5:1, containing 2% Et<sub>3</sub>N) to afford **31** (101.3 mg, 88%) as a white solid.  $[\alpha]_D^{20} = +18.4$  (c 0.10, CHCl<sub>3</sub>). <sup>1</sup>H NMR (400 MHz, CDCl<sub>3</sub>)  $\delta$  8.55 (d,  $J = 4.0$  Hz, 1H), 7.91 (d,  $J = 5.5$  Hz, 4H), 7.63 (t,  $J = 7.4$  Hz, 1H), 7.54 – 7.45 (m, 2H), 7.39 – 7.10 (m, 31H), 6.04 (d,  $J = 8.3$  Hz, 1H), 5.55 (s, 1H), 5.52 – 5.42 (m, 2H), 5.32 – 5.23 (m, 2H), 5.19 – 4.96 (m, 6H), 4.88 (d,  $J = 11.7$  Hz, 1H), 4.81 (d,  $J = 2.8$  Hz, 1H), 4.72 (d,  $J = 7.7$  Hz, 1H), 4.62 – 4.55 (m, 2H), 4.54 – 4.36 (m, 4H), 4.25 (d,  $J = 12.1$  Hz, 1H), 4.10 (dd,  $J = 12.5, 4.6$  Hz, 1H), 4.06 – 4.01 (m, 1H), 4.01 – 3.91

(m, 4H), 3.87 (d,  $J = 10.5$  Hz, 1H), 3.73 – 3.66 (m, 1H), 3.66 – 3.53 (m, 5H), 3.53 – 3.44 (m, 1H), 3.18 (t,  $J = 10.1$  Hz, 1H), 2.67 (dd,  $J = 12.8, 4.5$  Hz, 1H), 2.10 (s, 3H), 2.04 (s, 3H), 1.96 (s, 3H), 1.89 (s, 3H), 1.66 (t,  $J = 12.4$  Hz, 1H).  $^{13}\text{C}$  NMR (101 MHz,  $\text{CDCl}_3$ )  $\delta$  170.7, 169.9, 169.7, 169.5, 166.8, 165.4, 165.1, 156.2, 154.6, 149.5, 138.7, 138.1, 137.7, 136.9, 135.2, 132.73, 132.70, 130.3, 129.9, 129.8, 128.7, 128.60, 128.56, 128.5, 128.32, 128.26, 128.21, 128.17, 128.0, 127.9, 127.71, 127.66, 127.3, 123.0, 121.5, 101.8, 99.1, 98.5, 79.7, 77.4, 74.4, 73.7, 73.6, 72.6, 71.9, 71.8, 71.7, 71.0, 70.2, 69.2, 68.9, 68.4, 68.2, 68.2, 67.6, 67.5, 67.2, 63.9, 62.0, 60.1, 59.6, 54.6, 36.9, 20.9, 20.8, 20.73, 20.67. HRMS (ESI) calcd for  $\text{C}_{88}\text{H}_{90}\text{N}_8\text{O}_{27}\text{Na}$   $[\text{M}+\text{Na}]^+$  1713.5808, found 1713.5817.

**5-acetamido-3,5-dideoxy-D-glycero-D-galacto-non-2-ulopyranosylonic acid-(2→6)-O-[2-(Acetylamino)-2-deoxy- $\alpha$ -D-galactopyranosyl]-(3→1)-O- $\beta$ -D-galatopyranosyl)-L-serine (11)**

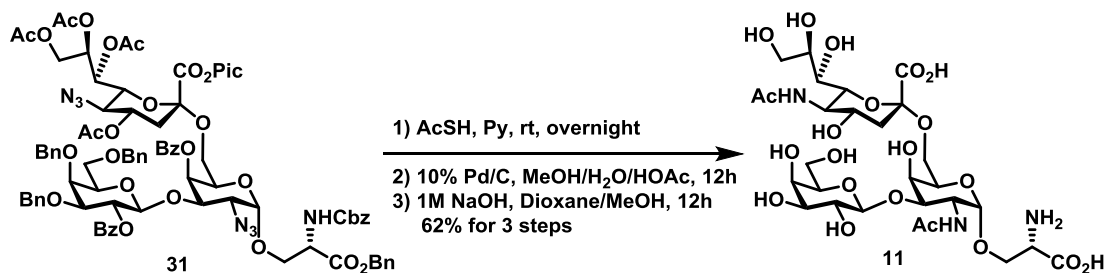

To a solution of compound **31** (80 mg, 0.05 mmol) in pyridine (1 mL) was added AcSH (1.7 mL, 18.92 mmol). The reaction mixture was stirred overnight at room temperature. Then the reaction mixture was concentrated *in vacuo*. The residue was purified by flash chromatography (MeOH/DCM, 1:40 to 1:9) to afford intermediate (81.5 mg, 100%). A mixture of the above intermediate (81.5 mg, 0.05 mmol) and Pd/C (524 mg, 10%) in MeOH/H<sub>2</sub>O/HOAc (5 mL/0.5 mL/0.05 mL) was stirred under an atmosphere of H<sub>2</sub> at room temperature for 12 h, after which the reaction mixture was filtered and concentrated *in vacuo* to afford the intermediate. To a solution of above intermediate in dioxane/MeOH (1 mL/1 mL) was added 2 mL 1M NaOH aq. The reaction was stirred for 12 h at room temperature. After the reaction was completed, the reaction was neutralized to pH = 7 by acetic acid, then filtered and

concentrated. The residue was purified by column chromatography on Sephadex TM LH-20 (H<sub>2</sub>O) to afford **11** (22.4 mg, 62%) as a white solid.  $[\alpha]_D^{20} = +89.7$  (c 0.19, H<sub>2</sub>O). <sup>1</sup>H NMR (400 MHz, D<sub>2</sub>O)  $\delta$  4.90 (d,  $J = 3.7$  Hz, 1H), 4.46 (d,  $J = 7.7$  Hz, 1H), 4.34 (dd,  $J = 11.1, 3.6$  Hz, 1H), 4.25 (d,  $J = 2.3$  Hz, 1H), 4.18 – 4.02 (m, 3H), 4.00 – 3.96 (m, 1H), 3.95 – 3.80 (m, 6H), 3.79 – 3.56 (m, 9H), 3.54 – 3.48 (m, 1H), 2.74 (dd,  $J = 12.4, 4.5$  Hz, 1H), 2.04 (s, 3H), 2.03 (s, 3H), 1.68 (t,  $J = 12.1$  Hz, 1H). <sup>13</sup>C NMR (151 MHz, D<sub>2</sub>O)  $\delta$  175.0, 174.6, 173.5, 104.6, 100.2, 98.2, 76.5, 74.9, 72.55, 72.48, 71.7, 70.5, 69.4, 68.6, 68.5, 68.2, 67.0, 63.8, 62.6, 60.9, 54.4, 51.8, 48.3, 40.2, 22.03, 21.98. HRMS (ESI) calcd for C<sub>28</sub>H<sub>46</sub>N<sub>3</sub>O<sub>21</sub> [M-H]<sup>-</sup> 760.2629, found 760.2624.

### Synthesis of 2,3 STF antigen (**12**)

**L-Serine 5-acetamido-7,8,9-tri-O-acetyl-3,5-dideoxy-D-glycero- $\alpha$ -D-galacto-non-2-ulopyranosylonate-(2 $\rightarrow$ 3)-2-O-benzoyl-4,6-O-benzylidene-3-O-(*p*-methoxy)benzyl- $\alpha$ -D-galactopyranosyl-1 $\rightarrow$ 6)-N-(benzyloxycarbonyl)-O-(2-azido-4-O-benzoyl-6-O-tert-butyl-diphenylsilyl-2-deoxy- $\alpha$ -D-galactopyranosyl)-benzyl ester (**40**)**

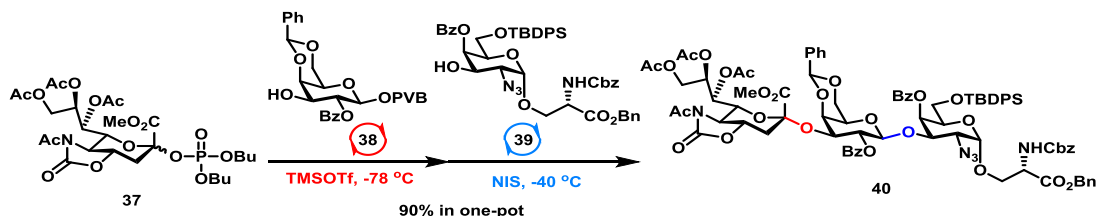

A suspension of donor **37**<sup>19</sup> (240 mg, 0.38 mmol), PVB acceptor **38**<sup>20</sup> (87.4 mg, 0.15 mmol), and activated 4Å MS (430 mg) in anhydrous DCM (3.8 ml) was stirred at room temperature for 15 min and was then cooled to -78 °C. TMSOTf (0.068 mL, 0.38 mmol) was added to the mixture dropwise. After being stirred at -78 °C for another 15 min, acceptor **39** (103.8 mg, 0.12 mmol), NIS (51 mg, 0.23 mmol) were added successively. The reaction was allowed to warm to -40 °C. After being stirred at -40 °C for another 2 h, the reaction was quenched with Et<sub>3</sub>N (1 mL) and filtered. The filtrates were concentrated under vacuum to give a residue, which was purified by flash column chromatography (petroleum ether/ethyl acetate, 1.5:1) and Sephadex TM LH-20 (MeOH-DCM =1:1) to afford **40** (182.3 mg, 90%) as a white foam.  $[\alpha]_D^{20} =$

+82.9 (c 0.16, CHCl<sub>3</sub>). <sup>1</sup>H NMR (400 MHz, CDCl<sub>3</sub>) δ 7.93 (d, *J* = 7.5 Hz, 2H), 7.88 (d, *J* = 7.6 Hz, 2H), 7.62 (d, *J* = 6.6 Hz, 2H), 7.58 (d, *J* = 7.1 Hz, 2H), 7.49 (t, *J* = 6.8 Hz, 2H), 7.37 – 7.22 (m, 25H), 5.90 (s, 1H), 5.78 (s, 1H), 5.67 (d, *J* = 8.7 Hz, 1H), 5.63 – 5.51 (m, 2H), 5.30 (t, *J* = 8.9 Hz, 1H), 5.22 – 5.04 (m, 5H), 4.90 (d, *J* = 7.8 Hz, 1H), 4.84 (d, *J* = 2.8 Hz, 1H), 4.62 (d, *J* = 8.3 Hz, 1H), 4.55 – 4.46 (m, 2H), 4.42 – 4.33 (m, 2H), 4.24 (dd, *J* = 9.7, 3.5 Hz, 1H), 4.17 (dd, *J* = 10.5, 2.5 Hz, 1H), 4.07 (d, *J* = 12.0 Hz, 1H), 4.04 – 3.96 (m, 3H), 3.91 (dd, *J* = 11.6, 9.8 Hz, 1H), 3.77 (dd, *J* = 10.5, 4.2 Hz, 1H), 3.70 – 3.59 (m, 2H), 3.56 (dd, *J* = 10.6, 2.6 Hz, 1H), 3.49 (t, *J* = 10.4 Hz, 1H), 3.23 (s, 3H), 2.54 (dd, *J* = 11.8, 2.9 Hz, 1H), 2.34 (s, 3H), 2.13 (s, 3H), 2.08 (s, 3H), 2.04 (s, 3H), 1.81 (t, *J* = 12.4 Hz, 1H), 0.99 (s, 9H). <sup>13</sup>C NMR (151 MHz, CDCl<sub>3</sub>) δ 171.5, 171.11, 171.05, 169.8, 169.4, 165.9, 165.2, 164.9, 156.0, 153.5, 137.9, 136.1, 135.60, 135.58, 135.1, 133.3, 133.1, 132.9, 132.7, 130.2, 130.1, 129.9, 129.7, 129.7, 129.1, 128.7, 128.68, 128.65, 128.54, 128.49, 128.4, 128.24, 128.22, 128.1, 127.72, 127.70, 126.65, 101.2, 100.9, 99.5, 99.0, 76.1, 74.8, 74.4, 74.2, 74.0, 72.1, 71.2, 70.6, 69.8, 68.8, 68.5, 67.7, 67.4, 66.4, 63.3, 62.8, 59.6, 59.1, 54.4, 52.8, 36.7, 26.8, 24.5, 21.2, 21.0, 20.8, 19.2. HRMS (ESI) calcd for C<sub>86</sub>H<sub>91</sub>N<sub>5</sub>O<sub>28</sub>SiNa [M+Na]<sup>+</sup> 1692.5512, found 1692.5513.

**L-Serine 5-acetamido-7,8,9-tri-O-acetyl-3,5-dideoxy-D-glycero- $\alpha$ -D-galacto-non-2-ulopyranosylonate-(2 $\rightarrow$ 3)-2-O-benzoyl-4,6-O-benzylidene-3-O-(*p*-methoxy)benzyl- $\alpha$ -D-galactopyranosyl-1 $\rightarrow$ 6)-*N*-(benzyloxycarbonyl)-*O*-(2-azido-4-O-benzoyl-2-deoxy- $\alpha$ -D-galactopyranosyl)-benzyl ester (41)**

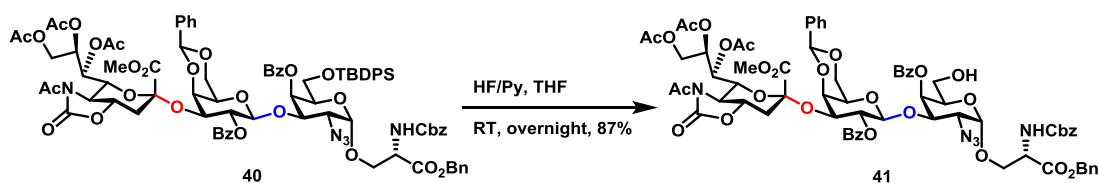

Compound **40** (197 mg, 0.12 mmol) was dissolved in anhydrous THF (1.2 mL), and HF/pyridine (70%, 0.15 mL, 1.18 mmol) was added dropwise. The resulting mixture was stirred overnight at room temperature, the reaction mixture was then quenched with Et<sub>3</sub>N, diluted with ethyl acetate and washed with saturated NaHCO<sub>3</sub>

solution and brine. The organic layer was concentrated under vacuum. The residue was purified by column chromatography on silica gel (PE:EA = 1:1) to afford **41** (146.3 mg, 87%,) as a white foam.  $[\alpha]_D^{20} = +61.0$  (c 0.12,  $\text{CHCl}_3$ ).  $^1\text{H}$  NMR (400 MHz,  $\text{CDCl}_3$ )  $\delta$  8.03 (d,  $J = 7.1$  Hz, 4H), 7.63 – 7.49 (m, 2H), 7.45 – 7.24 (m, 15H), 7.11 (t,  $J = 7.1$  Hz, 2H), 6.96 (d,  $J = 6.7$  Hz, 2H), 5.89 (s, 1H), 5.82 (d,  $J = 6.8$  Hz, 1H), 5.71 (s, 1H), 5.54 (d,  $J = 8.3$  Hz, 1H), 5.48 (s, 1H), 5.33 (t,  $J = 8.2$  Hz, 1H), 5.22 – 5.06 (m, 5H), 4.87 (d,  $J = 6.9$  Hz, 1H), 4.81 (s, 1H), 4.59 (s, 1H), 4.54 – 4.42 (m, 2H), 4.37 (s, 1H), 4.34 – 4.22 (m, 2H), 4.11 (d,  $J = 8.9$  Hz, 1H), 4.08 – 3.93 (m, 4H), 3.93 – 3.84 (m, 1H), 3.69 – 3.41 (m, 6H), 3.28 (s, 3H), 2.53 (d,  $J = 10.2$  Hz, 1H), 2.34 (s, 3H), 2.12 (s, 3H), 2.07 (s, 3H), 2.04 (s, 3H), 1.81 (t,  $J = 12.1$  Hz, 1H).  $^{13}\text{C}$  NMR (101 MHz,  $\text{CDCl}_3$ )  $\delta$  171.4, 170.99, 170.97, 169.6, 169.3, 168.2, 165.8, 165.0, 155.8, 153.4, 137.7, 136.1, 135.1, 133.3, 132.9, 130.2, 129.7, 129.5, 128.9, 128.7, 128.6, 128.5, 128.4, 128.3, 128.2, 128.0, 126.4, 101.6, 101.1, 99.5, 99.1, 76.1, 75.2, 74.7, 74.3, 74.2, 74.1, 72.0, 70.6, 70.3, 69.6, 69.2, 68.3, 67.7, 67.4, 66.3, 63.2, 60.0, 59.2, 59.1, 54.5, 52.7, 36.7, 29.7, 24.4, 21.0, 20.9, 20.6. HRMS (ESI) calcd for  $\text{C}_{70}\text{H}_{73}\text{N}_5\text{O}_{28}\text{Na}$   $[\text{M}+\text{Na}]^+$  1454.4334, found 1454.4341.

**5-acetamido-3,5-dideoxy-D-glycero- $\alpha$ -D-galacto-non-2-ulopyranosylonic acid-(2  $\rightarrow$ 3)-O- $\beta$ -D-galactopyranosyl-O-[2-(Acetylamino)-2-deoxy- $\alpha$ -D-glucopyranosyl)]-L-serine (**12**)**

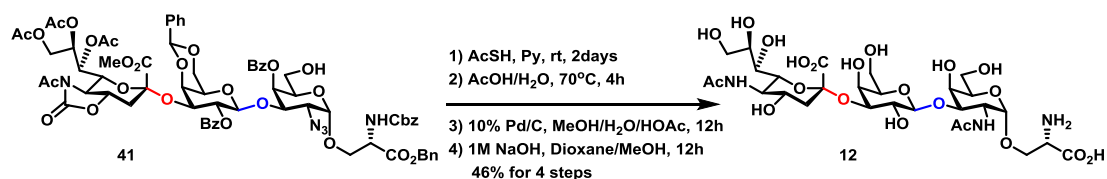

To a solution of compound **41** (56 mg, 0.04 mmol) in pyridine (2 mL) was added AcSH (0.71 mL, 7.82 mmol). The reaction mixture was stirred at room temperature for two days. Then the reaction mixture was concentrated *in vacuo*. The residue was purified by flash chromatography (MeOH/DCM, 1:50) to afford intermediate (47.6 mg, 84%). The above intermediate (47 mg, 0.03 mmol) was dissolved in AcOH/ $\text{H}_2\text{O}$  (2.5 mL, v/v 4:1), 70 °C stirred for 4 h, then the reaction mixture was concentrated *in*



*vacuo*. The residue was purified by flash chromatography (MeOH/DCM, 1:50 to 1:30) to afford intermediate (31.6 mg, 72%). A mixture of the above intermediate (31 mg, 0.02 mmol) and Pd/C (54 mg, 10%) in MeOH/H<sub>2</sub>O/HOAc (4 mL/0.4 mL/0.04 mL) was stirred under an atmosphere of H<sub>2</sub> at room temperature for 12 h, after which the reaction mixture was filtered and concentrated *in vacuo* to afford the intermediate (21.4 mg, 83%). To a solution of above intermediate in dioxane/MeOH (1 mL/1 mL) was added 1 mL 1M NaOH aq. The reaction was stirred for 12 h at room temperature. After the reaction was completed, the reaction was neutralized to pH = 7 by acetic acid, then filtered and concentrated. The residue was purified by column chromatography on Sephadex TM LH-20 (MeOH-H<sub>2</sub>O, 1:1 ) to afford **12** (13.1 mg, 91%) as a white solid.  $[\alpha]_D^{20} = +40.2$  (c 0.10, H<sub>2</sub>O). <sup>1</sup>H NMR (400 MHz, D<sub>2</sub>O) δ 4.88 (d, *J* = 3.4 Hz, 1H), 4.47 (d, *J* = 7.6 Hz, 1H), 4.30 (dd, *J* = 11.1, 3.6 Hz, 1H), 4.22 – 4.09 (m, 3H), 4.07 – 3.98 (m, 2H), 3.97 – 3.86 (m, 3H), 3.85 – 3.74 (m, 4H), 3.73 – 3.51 (m, 8H), 3.46 (d, *J* = 9.3 Hz, 1H), 2.43 (dd, *J* = 13.0, 4.5 Hz, 1H), 2.00 (s, 3H), 1.99 (s, 3H), 1.63 (t, *J* = 12.3 Hz, 1H). <sup>13</sup>C NMR (126 MHz, D<sub>2</sub>O) δ 174.9, 174.3, 104.3, 102.5, 97.6, 77.1, 76.6, 74.3, 71.1, 70.6, 69.5, 68.6, 68.2, 68.0, 67.5, 65.8, 62.9, 60.8, 60.3, 54.2, 51.6, 47.9, 21.7. HRMS (ESI) calcd for C<sub>28</sub>H<sub>46</sub>N<sub>3</sub>O<sub>21</sub> [M-H]<sup>-</sup> 760.2629, found 760.2624.

### Synthesis of glycophorin (13)

**L-Serine 5-acetamido-7,8,9-tri-O-acetyl-3,5-dideoxy-D-glycero- $\alpha$ -D-galacto-non-2-ulopyranosylonate-(2→3)-2-O-benzoyl-4,6-O-benzylidene-3-O-(*p*-methoxy)benzyl- $\alpha$ -D-galactopyranosyl-1→6)-N-(benzyloxycarbonyl)-O-(2-azido-4-O-benzoyl-2-deoxy- $\alpha$ -D-galactopyranosyl)-(3→1)-O-(3,4,6-tri-O-benzyl-2-O-benzoyl- $\beta$ -D-galactopyranosyl)-benzyl ester (42)**

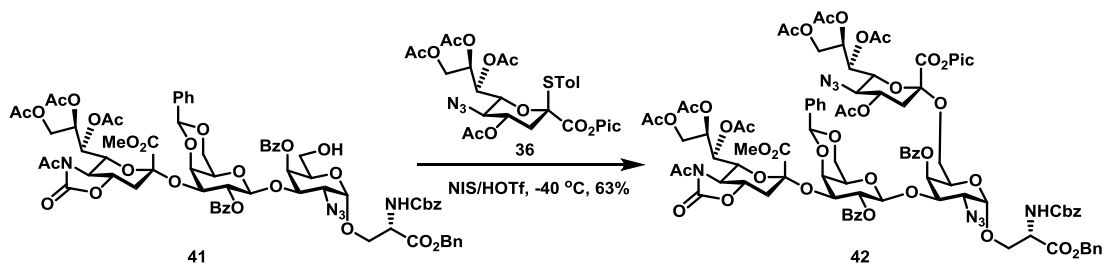

---

A suspension of donor **36** (164.4 mg, 0.25 mmol), acceptor **41** (143 mg, 0.10 mmol), and activated 3Å MS (310 mg) in anhydrous DCM (5 mL) was stirred at room temperature for 15 min and was then cooled to -40 °C. NIS (134.8 mg, 0.60 mmol) and HOTf (22 µL, 0.25 mmol) were added successively. The resulting mixture was stirred at -40 °C for 2 h, then quenched with Et<sub>3</sub>N (1 mL) and filtered. The filtrates were concentrated under vacuum to give a residue, which was purified by flash column chromatography (petroleum ether-ethyl acetate, 1:1) and Sephadex TM LH-20 (MeOH-DCM =1:1) to afford **42** (122.9 mg, 63%) as a white foam.  $[\alpha]_D^{20} = +60.9$  (c 0.18, CHCl<sub>3</sub>). <sup>1</sup>H NMR (600 MHz, CDCl<sub>3</sub>) δ 8.58 (s, 1H), 7.89 (t, *J* = 8.2 Hz, 4H), 7.65 (t, *J* = 7.2 Hz, 1H), 7.52 – 7.44 (m, 2H), 7.39 – 7.27 (m, 17H), 7.24 (d, *J* = 6.5 Hz, 3H), 7.21 – 7.18 (m, 1H), 6.06 (d, *J* = 8.4 Hz, 1H), 5.87 (s, 1H), 5.63 (d, *J* = 2.2 Hz, 1H), 5.60 – 5.52 (m, 2H), 5.44 (dd, *J* = 8.4, 1.2 Hz, 1H), 5.32 – 5.25 (m, 3H), 5.20 – 5.16 (m, 2H), 5.15 – 5.06 (m, 4H), 5.06 – 4.99 (m, 1H), 4.89 (d, *J* = 7.9 Hz, 1H), 4.86 (d, *J* = 3.4 Hz, 1H), 4.65 – 4.57 (m, 1H), 4.54 – 4.46 (m, 2H), 4.40 (d, *J* = 3.3 Hz, 1H), 4.33 (d, *J* = 12.0 Hz, 1H), 4.26 (dd, *J* = 17.4, 7.7 Hz, 2H), 4.15 (dd, *J* = 10.6, 3.1 Hz, 1H), 4.12 – 4.05 (m, 2H), 4.04 – 3.97 (m, 3H), 3.92 – 3.87 (m, 2H), 3.73 – 3.67 (m, 1H), 3.67 – 3.61 (m, 2H), 3.56 – 3.46 (m, 2H), 3.22 (s, 3H), 3.18 (t, *J* = 10.1 Hz, 1H), 2.69 (dd, *J* = 13.1, 4.9 Hz, 1H), 2.55 (dd, *J* = 11.9, 3.4 Hz, 1H), 2.34 (s, 3H), 2.14 (s, 3H), 2.11 (s, 3H), 2.08 (s, 3H), 2.05 (s, 3H), 2.04 (s, 3H), 1.95 (s, 3H), 1.88 (s, 3H), 1.81 (t, *J* = 12.3 Hz, 1H), 1.69 (t, *J* = 12.5 Hz, 1H). <sup>13</sup>C NMR (151 MHz, CDCl<sub>3</sub>) δ 171.6, 171.2, 171.1, 170.9, 170.0, 169.79, 169.77, 169.6, 169.5, 166.9, 165.9, 165.3, 164.9, 156.2, 154.5, 153.5, 149.6, 137.9, 137.0, 136.3, 135.3, 132.9, 132.7, 130.22, 130.18, 129.9, 129.7, 129.1, 128.8, 128.7, 128.6, 128.4, 128.3, 128.22, 128.19, 126.6, 123.2, 121.6, 101.2, 100.6, 99.5, 99.1, 98.6, 76.2, 74.9, 74.34, 74.25, 73.2, 72.1, 71.8, 71.0, 70.6, 69.9, 69.3, 68.9, 68.5, 68.4, 68.2, 67.7, 67.6, 67.3, 66.5, 63.9, 63.3, 62.0, 60.1, 59.6, 59.1, 54.5, 52.8, 36.8, 29.8, 24.5, 21.2, 21.1, 21.0, 20.79, 20.77. HRMS (ESI) calcd for C<sub>93</sub>H<sub>99</sub>N<sub>9</sub>O<sub>39</sub>Cl [M+Cl]<sup>-</sup> 2000.5734, found 2000.5737.

**5-acetamido-3,5-dideoxy-D-glycero- $\alpha$ -D-galacto-non-2-ulopyranosylonic acid-(2  
 $\rightarrow$ 3)-O- $\beta$ -D-galactopyranosyl-O-[2-(Acetylamino)-2-deoxy- $\alpha$ -D-glucopyranosyl)]-  
(3 $\rightarrow$ 1)-O- $\beta$ -D-galactopyranosyl)-L-serine (**13**)**

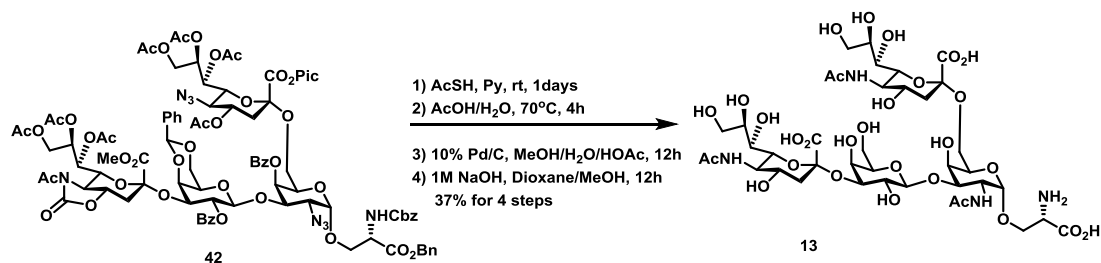

To a solution of compound **42** (68 mg, 0.03 mmol) in pyridine (2 mL) was added AcSH (1.25 mL, 13.83 mmol). The reaction mixture was stirred at room temperature for one day. Then the reaction mixture was concentrated *in vacuo*. The residue was purified by flash chromatography (MeOH/DCM, 1:50 to 1:30) to afford intermediate (67 mg, 97%). The above intermediate (67 mg, 0.03 mmol) was dissolved in AcOH/H<sub>2</sub>O (2.5 mL, v/v 4:1), 70 °C stirred for 4 h, then the reaction mixture was concentrated *in vacuo*. The residue was purified by flash chromatography (MeOH/DCM, 1:30) to afford intermediate (50.6 mg, 79%). A mixture of the above intermediate (50 mg, 0.03 mmol) and Pd/C (93 mg, 10%) in MeOH/H<sub>2</sub>O/HOAc (5 mL/0.5 mL/0.05 mL) was stirred under an atmosphere of H<sub>2</sub> at room temperature for 12 h, after which the reaction mixture was filtered and concentrated *in vacuo* to afford the intermediate (31.6 mg, 76%). To a solution of above intermediate (31 mg, 0.02 mmol) in dioxane/MeOH (1 mL/1 mL) was added 1 mL 1M NaOH aq. The reaction was stirred for 12 h at room temperature. After the reaction was completed, the reaction was neutralized to pH = 7 by acetic acid, then filtered and concentrated. The residue was purified by column chromatography on Sephadex TM LH-20 (MeOH-H<sub>2</sub>O, 1:1 ) to afford **13** (12.8 mg, 63%) as a white solid.  $[\alpha]_D^{20} = +35.0$  (c 0.16 , H<sub>2</sub>O). <sup>1</sup>H NMR (400 MHz, D<sub>2</sub>O)  $\delta$  4.88 (d, *J* = 3.4 Hz, 1H), 4.49 (d, *J* = 7.6 Hz, 1H), 4.30 (dd, *J* = 11.2, 3.5 Hz, 1H), 4.23 (s, 1H), 4.22 – 4.12 (m, 2H), 4.10 – 3.99 (m, 3H), 3.98 – 3.74 (m, 10H), 3.73 – 3.53 (m, 11H), 3.49 (d, *J* = 9.7 Hz, 1H), 2.71 (dd, *J* = 12.3, 4.5 Hz, 1H), 2.46 (dd, *J* = 12.9, 4.4 Hz, 1H), 2.03 (s, 1H), 2.01 (s, 3H), 1.66 (t, *J* = 12.1 Hz, 2H). <sup>13</sup>C NMR (201 MHz, D<sub>2</sub>O)  $\delta$  175.4, 175.0, 174.7, 174.7, 173.5,

---

104.8, 102.9, 100.3, 98.1, 77.6, 77.0, 74.7, 72.6, 71.7, 71.6, 69.9, 69.4, 69.1 68.6, 68.4, 68.24, 68.23, 67.9, 66.2, 63.8, 63.3, 62.6, 60.7, 54.6, 52.0, 51.8, 48.3, 40.6, 40.2, 22.11, 22.10, 22.0. HRMS (ESI) calcd for C<sub>39</sub>H<sub>64</sub>N<sub>4</sub>O<sub>29</sub> [M-2H]<sup>2-</sup> 525.1755, found 525.1752.

### Mechanistic studies

To shed light on the reactive intermediates formed with the TMSI and Ph<sub>3</sub>PO reagent combination, we studied the activation of donor **17a** by NMR spectroscopy. When donor **17a** was activated with TMSI in CDCl<sub>3</sub> in the absence of Ph<sub>3</sub>PO additive (Within 5 min), a mixture of two products was formed. The products were tentatively assigned as  **$\alpha$ -iodide** (**Figure S1**, H-1:  $\delta = 6.93$  ppm,  $J = 3.9$  Hz) and its  **$\beta$ -iodide** (H-1:  $\delta = 5.65$  ppm,  $J = 9.7$  Hz),  **$\alpha/\beta = 4:1$** . In time (4 h), the  **$\beta$ -iodide** isomerized into its more stable  **$\alpha$ -iodide** ( **$\alpha/\beta > 20:1$** ). Alternatively, treatment of a mixture of donor **17a** and Ph<sub>3</sub>PO in CDCl<sub>3</sub> with TMSI (Within 5 min), showed a clean conversion of the imidate into the anomeric  **$\alpha$ -iodide**. The  **$\beta$ -iodide** was not observed, nor could we detect the presence of any anomeric phosphonium species by NMR spectroscopy. However, through ESI-MS experiment monitoring, we detected the MS of **phosphonium iodide intermediate** (**Figure S2**).

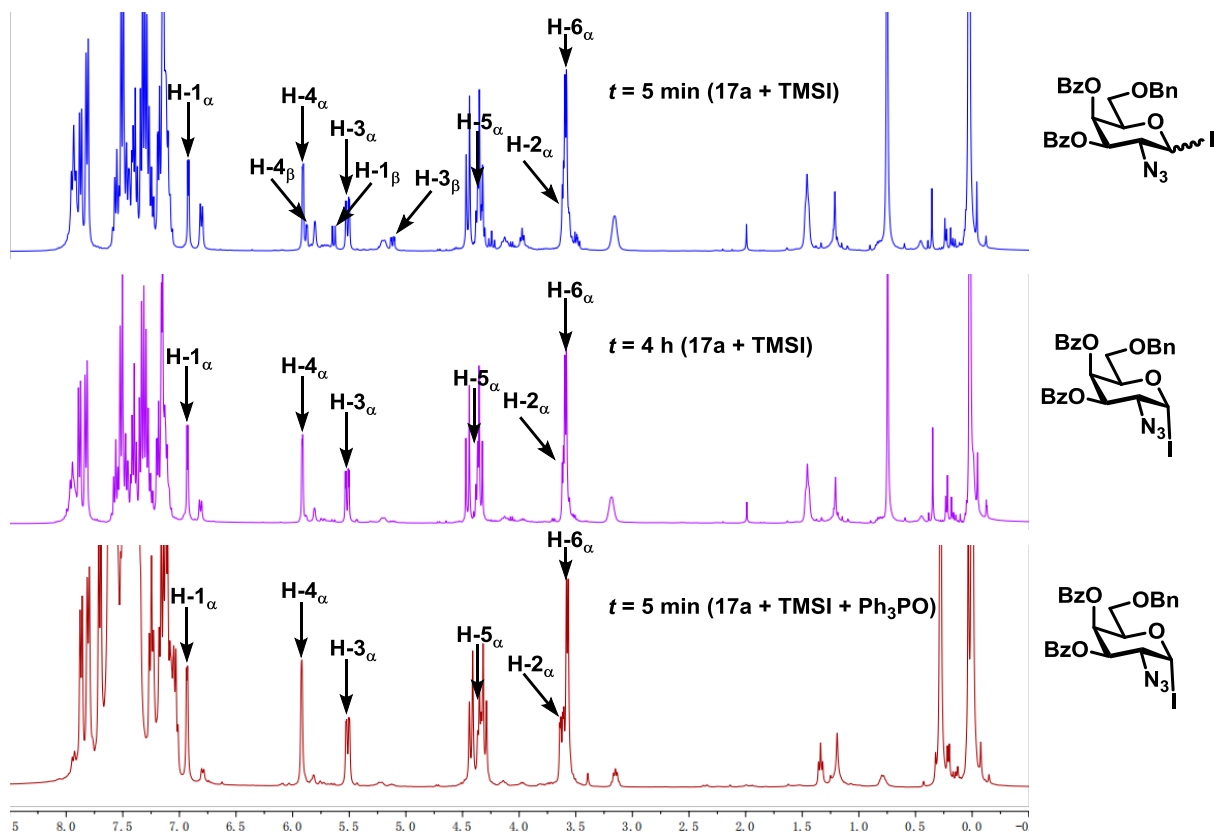

Figure S1. Detection of the anomeric iodides intermediates by  $^1\text{H-NMR}$

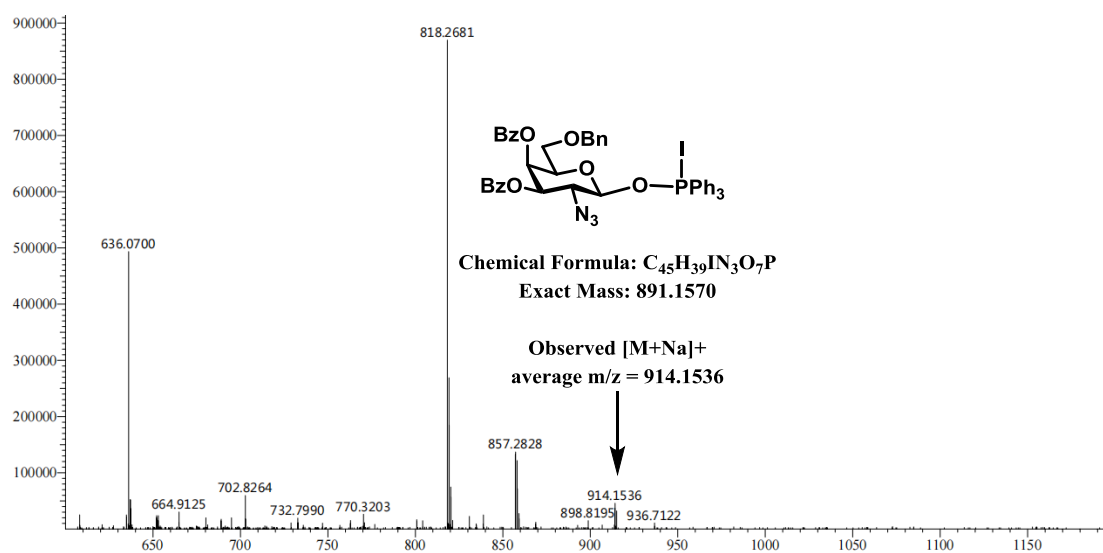

Figure S2. Detection of the phosphonium iodide intermediate by MS

### Glycosylation with 2-deoxy Galactosyl PTFAI donors 17q-s

*N*-(Benzyl)benzyloxycarbonyl-5-amino-pentyl 2-deoxy-3,4,6-tri-*O*-benzyl-D-galactopyranoside (19q)

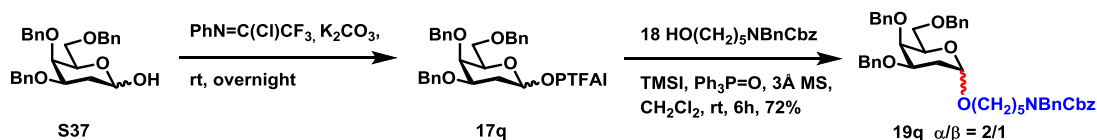

To a solution of **S37**<sup>21</sup> (94.5 mg, 0.22 mmol) in acetone (1.0 mL) were added 2,2,2-trifluoro-N-phenylacetimidoyl chloride (58.7 mg, 0.35 mmol) and K<sub>2</sub>CO<sub>3</sub> (90.2 mg, 0.65 mmol). The mixture was stirred at rt overnight, and then filtered and concentrated in vacuo to afford **17q** (This compound is unstable, so it was used directly without further structural characterization). The glycosylation reaction was carried out according to General Experimental Procedures at rt for 6 h, using donor **17q** (131.9 mg, 0.22 mmol), acceptor **18** (106.8 mg, 0.33 mmol), DCM 2.2 mL, Ph<sub>3</sub>P=O (363.2 mg, 1.31 mmol) and TMSI (31 μL, 0.22 mmol). The product was purified by silica gel column chromatography (PE-EA, 20:1-4:1) to afford **19q** (116.2 mg, 72%, α/β = 2:1) as a colorless syrup. <sup>1</sup>H NMR (400 MHz, CDCl<sub>3</sub>) δ 7.38 – 7.12 (m, 25H, Ar), 5.16 (d, *J* = 10.1 Hz, 2H, CH<sub>2</sub>-Cbz), 4.96 – 4.87 (m, 2H, H-1α, CH<sub>2</sub>-Bn), 4.65 – 4.54 (m, 3H, CH<sub>2</sub>-Bn), 4.51 – 4.38 (m, 4H, CH<sub>2</sub>-Bn), 4.36 – 4.32 (m, H-1β), 3.94 – 3.80 (m, 3H, H-3α), 3.66 – 3.49 (m, 3H, H-4α), 3.35 – 3.14 (m, 3H), 2.26 – 2.16 (m, 1H, H-2), 2.13 – 1.93 (m, 1H, H-2), 1.58 – 1.43 (m, 4H, CH<sub>2</sub>), 1.32 – 1.18 (m, 2H, CH<sub>2</sub>). <sup>13</sup>C NMR (101 MHz, CDCl<sub>3</sub>) δ 156.8, 156.2, 139.0, 138.96, 138.7, 138.4, 138.2, 138.0, 136.9, 128.57, 128.55, 128.48, 128.43, 128.40, 127.39, 128.3, 128.23, 128.15, 128.0, 127.93, 127.86, 127.8, 127.74, 127.68, 127.63, 127.51, 127.45, 127.40, 127.3, 100.5 (C-1β), 97.8 (C-1α), 75.0, 74.3, 74.2, 74.1, 73.6, 73.5, 73.2, 71.9, 70.5, 70.2, 70.0, 69.7, 69.4, 69.0, 67.23, 67.19, 50.5, 50.3, 47.2, 46.2, 32.9, 31.6, 31.5, 31.3, 30.2, 29.7, 29.34, 29.28, 28.0, 27.6, 23.6, 23.4. HRMS (ESI) calcd for C<sub>47</sub>H<sub>53</sub>NO<sub>7</sub>Na [M+Na]<sup>+</sup> 766.3714, found 766.3718.

**N-(Benzyl)benzyloxycarbonyl-5-amino-pentyl galactopyranoside (19r)**

**2-deoxy-3,4,6-tri-O-acetyl-D-**

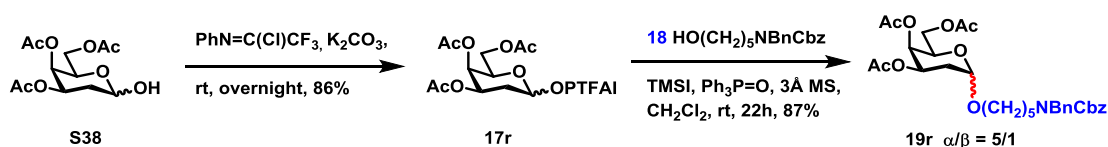

---

To a solution of **S38**<sup>21</sup> (318.1 mg, 1.10 mmol) in acetone (2.0 mL) were added 2,2,2-trifluoro-*N*-phenylacetimidoyl chloride (250.2 mg, 1.21 mmol) and K<sub>2</sub>CO<sub>3</sub> (227.1 mg, 1.64 mmol). The mixture was stirred at rt overnight, and then filtered and concentrated *in vacuo*. The crude product was purified by flash column chromatography (PE-EA, 30:1-4:1, containing 1% Et<sub>3</sub>N) to afford **17r** (435.8 mg, 86%) as a yellow syrup. <sup>1</sup>H NMR (400 MHz, CDCl<sub>3</sub>) δ 7.31 (t, *J* = 7.7 Hz, 2H), 7.16 – 7.08 (m, 1H), 6.83 (d, *J* = 7.8 Hz, 2H), 5.46 – 5.40 (m, 1H), 5.37 – 5.26 (m, 1H), 4.30 (s, 1H), 4.22 – 4.04 (m, 3H), 2.20 – 2.12 (m, 4H), 2.08 – 2.00 (m, 7H). <sup>13</sup>C NMR (101 MHz, CDCl<sub>3</sub>) δ 170.48, 170.46, 170.3, 170.2, 170.02, 169.96, 145.5, 143.6, 143.4, 128.93, 128.89, 124.6, 119.5, 119.3, 94.5, 72.1, 69.5, 67.9, 66.1, 65.5, 65.2, 62.1, 61.7, 60.5, 30.5, 28.7, 20.9, 20.8, 20.75, 20.72, 14.3. HRMS (ESI) calcd for C<sub>20</sub>H<sub>22</sub>NO<sub>8</sub>F<sub>3</sub>Na [M+Na]<sup>+</sup> 484.1190, found 484.1187. The glycosylation reaction was carried out according to **General Experimental Procedures** at rt for 22h, using donor **17r** (177.2 mg, 0.38 mmol), acceptor **18** (188.6 mg, 0.58 mmol), DCM 3.8 mL, Ph<sub>3</sub>P=O (641.3 mg, 2.30 mmol) and TMSI (55 μL, 0.38 mmol). The product was purified by silica gel column chromatography (PE-EA, 3:1) to afford **19r** (199 mg, 87%, α/β = 5:1) as a colorless syrup. <sup>1</sup>H NMR (400 MHz, CDCl<sub>3</sub>) δ 7.39 – 7.14 (m, 10H, Ar), 5.34 – 5.31 (m, 1H, H-4α), 5.30 – 5.24 (m, 1H, H-3), 5.17 (d, *J* = 12.6 Hz, 2H, CH<sub>2</sub>-Cbz), 5.01 – 4.92 (m, 1H, H-1α), 4.55 – 4.44 (m, 2H), 4.13 – 4.03 (m, 3H), 3.78 (t, *J* = 6.8 Hz, H-5β), 3.65 – 3.51 (m, 1H), 3.40 – 3.17 (m, 3H), 2.13 – 1.93 (m, 10H, H-2, CH<sub>3</sub>-Ac), 1.88 – 1.80 (m, 1H, H-2), 1.62 – 1.46 (m, 4H, CH<sub>2</sub>), 1.36 – 1.27 (m, 2H, CH<sub>2</sub>). <sup>13</sup>C NMR (101 MHz, CDCl<sub>3</sub>) δ 170.3, 170.2, 169.9, 156.6, 156.1, 137.9, 136.8, 128.5, 128.4, 127.9, 127.8, 127.2, 100.0 (C-1β), 97.4 (C-1α), 70.9, 69.4, 68.5, 67.5, 67.1, 66.7, 66.6, 66.2, 65.4, 62.4, 61.8, 50.5, 50.3, 47.1, 46.1, 32.0, 31.5, 31.4, 30.2, 29.6, 29.15, 29.10, 27.9, 27.5, 23.5, 23.2, 20.8, 20.7, 20.6. HRMS (ESI) calcd for C<sub>32</sub>H<sub>42</sub>NO<sub>10</sub> [M+H]<sup>+</sup> 600.2803, found 600.2802.

***N*-(Benzyl)benzyloxycarbonyl-5-amino-pentyl 2-deoxy-3,4,6-tri-*O*-benzoyl-D-galactopyranoside (19s)**

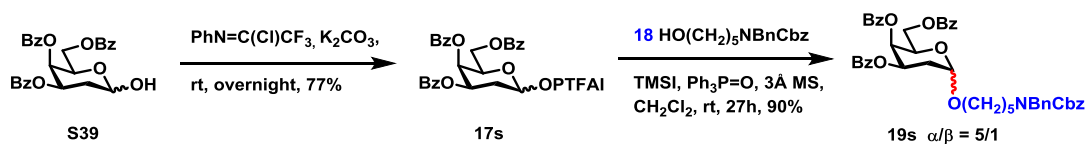

To a solution of **S39**<sup>21</sup> (537.8 mg, 1.13 mmol) in acetone (2.0 mL) were added 2,2,2-trifluoro-*N*-phenylacetimidoyl chloride (257.7 mg, 1.24 mmol) and  $K_2CO_3$  (233.9 mg, 1.69 mmol). The mixture was stirred at rt overnight, and then filtered and concentrated *in vacuo*. The crude product was purified by flash column chromatography (PE, containing 2%  $Et_3N$ ) to afford **17s** (559 mg, 77%) as a white solid.  $^1H$  NMR (400 MHz,  $CDCl_3$ )  $\delta$  8.16 – 8.06 (m, 2H), 8.05 – 7.98 (m, 2H), 7.86 (t,  $J = 7.8$  Hz, 2H), 7.62 (t,  $J = 7.7$  Hz, 1H), 7.58 – 7.55 (m, 1H), 7.53 – 7.46 (m, 4H), 7.45 – 7.40 (m, 2H), 7.39 – 7.30 (m, 2H), 7.30 – 7.21 (m, 2H), 7.14 – 7.06 (m, 1H), 6.83 – 6.70 (m, 2H), 5.95 (s, 1H), 5.82 – 5.72 (m, 1H), 4.70 – 4.56 (m, 2H), 4.49 – 4.35 (m, 1H), 2.57 – 2.35 (m, 2H).  $^{13}C$  NMR (101 MHz,  $CDCl_3$ )  $\delta$  166.0, 165.6, 165.5, 165.4, 165.3, 143.5, 143.4, 133.60, 133.57, 133.34, 133.26, 133.20, 130.0, 129.9, 129.8, 129.73, 129.71, 129.51, 129.47, 129.42, 129.34, 129.30, 129.2, 128.8, 128.6, 128.5, 128.42, 128.38, 128.36, 124.4, 119.4, 119.3, 72.6, 70.0, 68.8, 67.0, 66.5, 66.1, 63.0, 62.6, 31.1, 29.3. HRMS (ESI) calcd for  $C_{35}H_{28}NO_8F_3Na$   $[M+Na]^+$  670.1659, found 670.1661. The glycosylation reaction was carried out according to **General Experimental Procedures** at rt for 22h, using donor **17s** (158.0 mg, 0.24 mmol), acceptor **18** (119.8 mg, 0.37 mmol), DCM 2.4 mL,  $Ph_3P=O$  (407.4 mg, 1.46 mmol) and TMSI (35  $\mu$ L, 0.24 mmol). The product was purified by silica gel column chromatography (PE-EA, 4:1) to afford **19s** (172.9 mg, 90%,  $\alpha/\beta = 5:1$ ) as a colorless syrup.  $^1H$  NMR (400 MHz,  $CDCl_3$ )  $\delta$  8.11 (t,  $J = 9.2$  Hz, 2H, Ar), 8.02 (t,  $J = 8.1$  Hz, 2H, Ar), 7.85 (d,  $J = 7.5$  Hz, 2H, Ar), 7.57 (t,  $J = 7.4$  Hz, 1H, Ar), 7.52 – 7.41 (m, 4H, Ar), 7.39 – 7.14 (m, 14H, Ar), 5.86 (s, 1H, H-4 $\alpha$ ), 5.80 (d,  $J = 3.0$  Hz, H-4 $\beta$ ), 5.70 (d,  $J = 11.8$  Hz, 1H, H-3 $\alpha$ ), 5.43 – 5.34 (m, H-3 $\beta$ ), 5.16 (t,  $J = 16.7$  Hz, 3H, H-1 $\alpha$ ,  $CH_2$ -Cbz), 4.70 – 4.32 (m, 5H), 3.76 – 3.60 (m, 1H), 3.47 – 3.12 (m, 3H), 2.41 – 2.30 (m, 1H, H-2), 2.26 – 2.09 (m, 1H, H-2), 1.67 – 1.46 (m, 4H,  $CH_2$ ), 1.38 – 1.28 (m, 2H,  $CH_2$ ).  $^{13}C$  NMR (101 MHz,  $CDCl_3$ )  $\delta$  166.0, 165.7, 165.7, 165.4, 138.0, 136.9, 133.3, 133.1, 133.0, 129.9, 129.82, 129.79, 129.72, 129.65, 129.62, 129.5, 128.5, 128.42,



128.38, 128.3, 128.2, 127.9, 127.8, 127.3, 100.2 (C-1 $\beta$ ), 97.5 (C-1 $\alpha$ ), 71.4, 69.6, 67.70, 67.65, 67.3, 67.2, 67.1, 66.4, 63.3, 62.5, 50.5, 50.3, 47.1, 46.2, 32.7, 30.8, 29.7, 29.2, 27.9, 27.5, 23.5, 23.3. HRMS (ESI) calcd for C<sub>47</sub>H<sub>47</sub>NO<sub>10</sub>Na [M+Na]<sup>+</sup> 808.3092, found 808.3095.

### Computational studies

**Computational details.** All calculations were performed with Gaussian 09.<sup>22</sup> Geometry optimizations were performed in solvent with the M06-2X functional<sup>23</sup> and a mixed basis set of LANL2DZ for I and 6-31G(d) for other atoms. Single point energies in solvent were calculated with the M06-2X functional and a mixed basis set of SDD for I and 6-311+G(d,p) for other atoms. The SMD model<sup>24</sup> was used for the solvation corrections with CH<sub>2</sub>Cl<sub>2</sub> as the solvent. All minima have zero imaginary frequency and all transition states have only one imaginary frequency and were confirmed by intrinsic reaction coordinate calculations. The conformational searches were performed by using CREST/xTB<sup>25</sup>. The 3D structures and NCI plots<sup>26</sup> were generated using CYLView<sup>27</sup> and VMD,<sup>28</sup> respectively.

**Comparison of  $\alpha$ -iodide with  $\beta$ -iodide.** The control experiments shown in Figure S1 indicate that the mixture of  $\alpha$ -iodide and  $\beta$ -iodide ( $\alpha/\beta = 4:1$ ) can be observed at the initial stage of the reaction (5 min). Then, the  $\alpha/\beta$  ratio is significantly increased in 4 h ( $\alpha/\beta > 20:1$ ). Consistently, the computed energetics show that  $\alpha$ -iodide is 1.8 kcal/mol more stable than  $\beta$ -iodide (Figure S3).

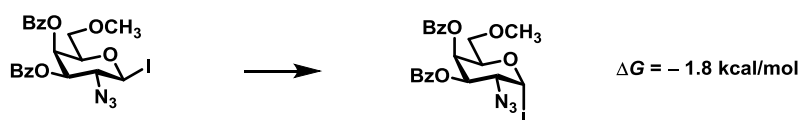

Figure S3. Energy difference between  $\alpha$ -iodide and  $\beta$ -iodide.

**Interactions between I and Ph<sub>3</sub>P=O.** For the  $\beta$ -anomeric phosphonium iodide species (**Int1**, Figure S4), the iodine and phosphine atoms are negatively and positively charged, respectively (charge on I:  $-0.977e$ ; charge on P:  $1.977e$ ). Thus,

**Int1** can be stabilized by the attractive electrostatic interactions. In addition, the NCI plots indicate that there are non-covalent interactions between I and  $\text{Ph}_3\text{P}=\text{O}$  moieties in both **Int1** and **TS4** (Figure S4), which also contribute to the stability of these structures. As such, the dissociations of I from **Int1** and **TS4** lead to less favorable **Int1a** and **TS4a**, respectively.

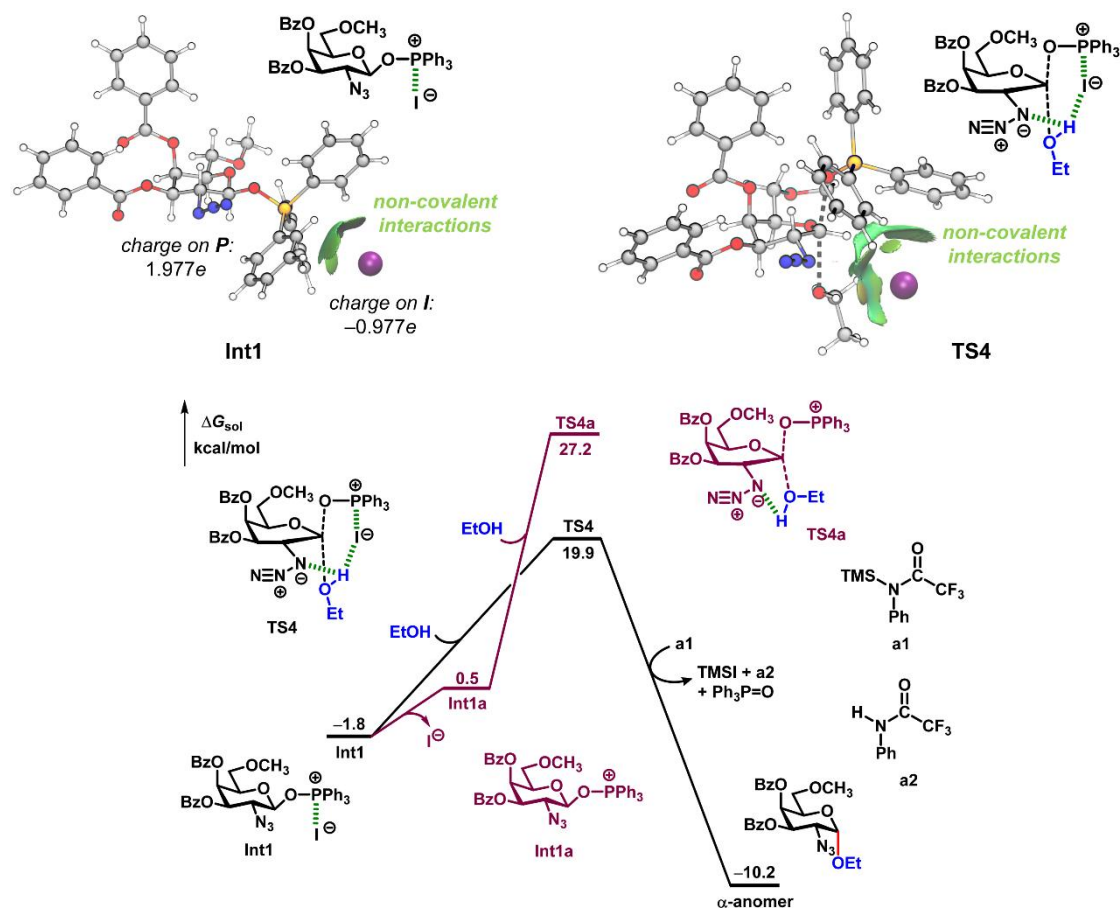

Figure S4. Interactions between I and  $\text{Ph}_3\text{P}=\text{O}$  in **Int1** and **TS4**.

**Reaction of  $\beta$ -iodide with  $\text{Ph}_3\text{P}=\text{O}$ .** As indicated in Scheme 6b in the main text,  $\text{Ph}_3\text{P}=\text{O}$  can significantly promote the  $\text{S}_{\text{N}}2$  displacement of  $\alpha$ -iodide. We further studied the reaction of  $\beta$ -iodide with  $\text{Ph}_3\text{P}=\text{O}$ , and the energy profiles are shown in Figure S5. The results show that  $\text{Ph}_3\text{P}=\text{O}$  can also replace the iodine atom of  $\beta$ -iodide. The computed  $\text{S}_{\text{N}}2$  transition state (**TS5**) has a barrier of 14.7 kcal/mol, generating the  $\alpha$ -anomeric phosphonium iodide intermediate (**Int2**). The ensuing nucleophilic attack by alcohol requires a barrier of 27.1 kcal/mol (**TS6**) to form the undesired  $\beta$ -anomer.

The relatively high barrier of **TS6** renders the generation of **Int2** reversible. Thus, although  $\text{Ph}_3\text{P}=\text{O}$  is more reactive than alcohol towards  $\beta$ -iodide (**TS5** vs. **TS1**), the overall pathway of  $\text{Ph}_3\text{P}=\text{O}$  mediated  $\text{S}_{\text{N}}2$  displacement of  $\beta$ -iodide is less favorable than the direct  $\text{S}_{\text{N}}2$  displacement of  $\beta$ -iodide with alcohol (**TS6** vs. **TS1**). Therefore,  $\text{Ph}_3\text{P}=\text{O}$  is less effective for the transformation of  $\beta$ -iodide  $\rightarrow$   $\beta$ -anomer. Instead, the process of  $\beta$ -iodide  $\rightarrow$   $\alpha$ -anomer via **TS1** is more kinetically favorable.

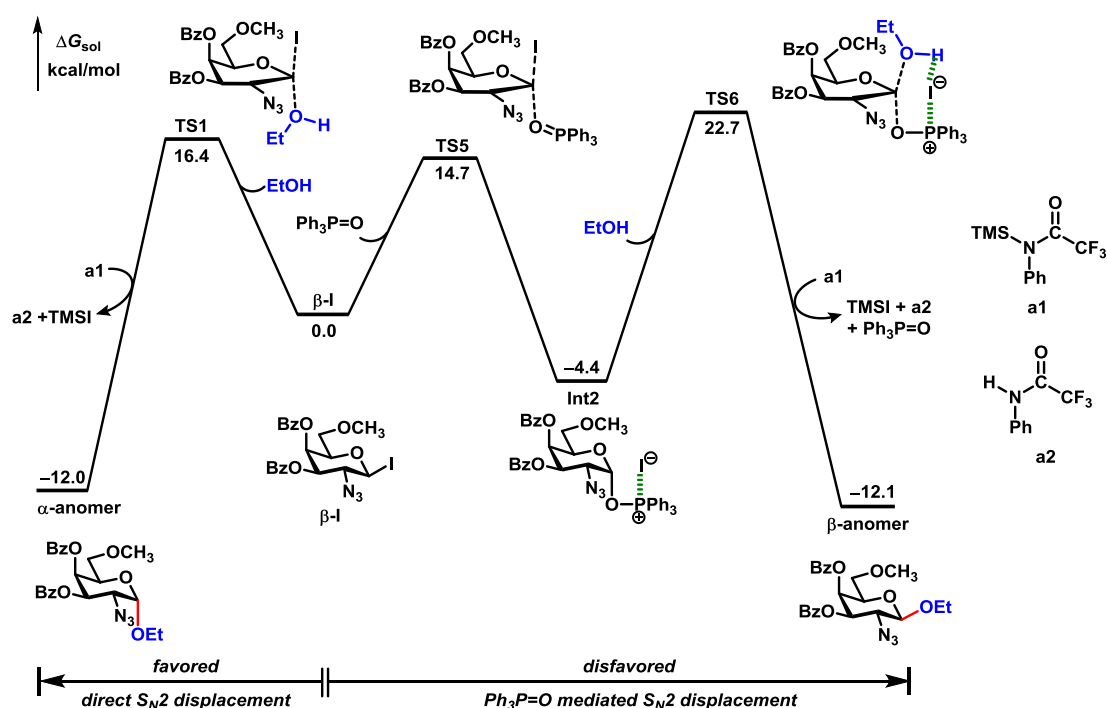

Figure S5. Energy profiles for  $\text{S}_{\text{N}}2$  nucleophilic reaction of  $\beta$ -iodide with alcoholic acceptor.

**Conformational search for key transition states.** To obtain the lowest energy structures for the  $\text{S}_{\text{N}}2$  displacement transition states with the  $\beta/\alpha$ -anomeric phosphonium iodide species (**TS4** and **TS6**), we carried out conformational search by using CREST with the default setting. The suggested 69 conformers for **TS4** and 66 conformers for **TS6** were further calculated at the M06-2X/SDD-6-311+G(d,p)-SMD(DCM)//M06-2X/LANL2DZ-6-31(d)-SMD(DCM) level. The three lowest energy conformers of these transition states are shown in Figure S6.

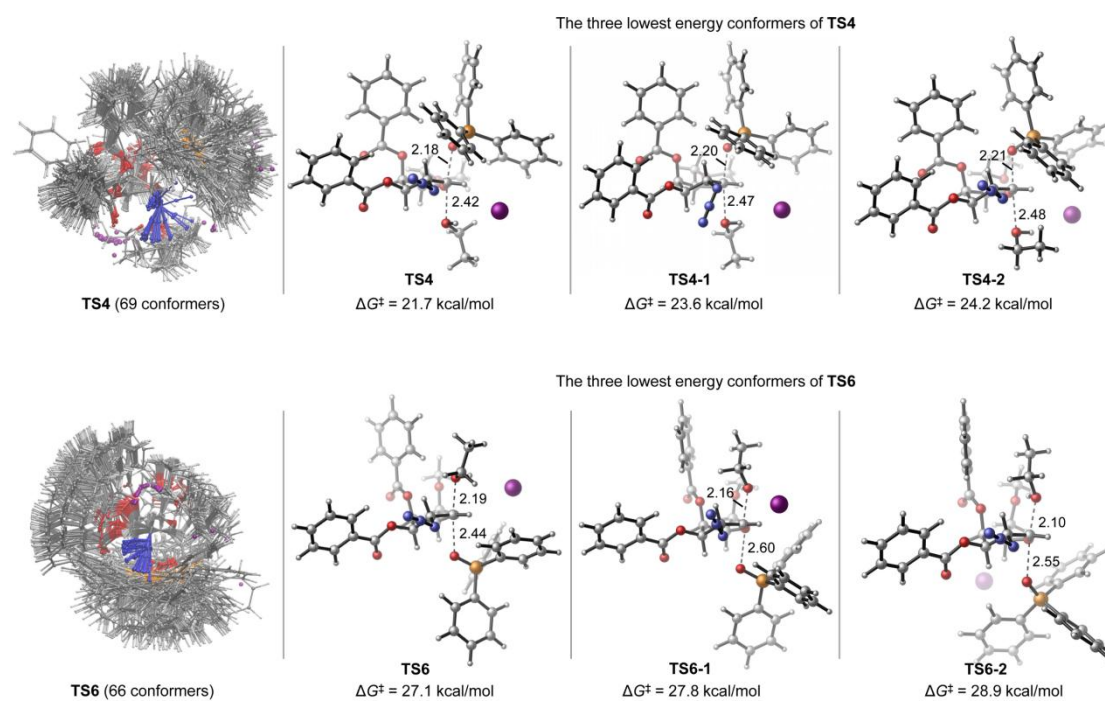

Figure S6. Results of conformational search for **TS4** and **TS6**.

---

## References

- (1) Czernecki, S.; Ayadi, E. *Can. J. Chem.* **1995**, *73*, 343.
- (2) Yu, B.; Tao, H. *Tetrahedron Lett.* **2001**, *42*, 2405.
- (3) van der Es, D.; Groenia, N. A.; Laverde, D.; Overkleeft, H. S.; Huebner, J.; van der Marel, G. A.; Codée, J. D. C. *Biorg. Med. Chem.* **2016**, *24*, 3893.
- (4) Lee, B.-Y.; Oh, J. W.; Baek, J. Y.; Jeon, H. B.; Kim, K. S. *J. Org. Chem.* **2016**, *81*, 11372.
- (5) Kotamagari, T. K.; Gonnade, R. G.; Bhattacharya, A. K. *Org. Lett.* **2017**, *19*, 3564.
- (6) France, R. R.; Compton, R. G.; Davis, B. G.; Fairbanks, A. J.; Rees, N. V.; Wadhawan, J. D. *Org. Biomol. Chem.* **2004**, *2*, 2195.
- (7) Zhang, Z.; Ollmann, I. R.; Ye, X.-S.; Wischnat, R.; Baasov, T.; Wong, C.-H. *J. Am. Chem. Soc.* **1999**, *121*, 734.
- (8) Hevey, R.; Ling, C.-C. *Carbohydr. Res.* **2017**, *445*, 65.
- (9) Fairweather, J. K.; Karoli, T.; Ferro, V. *Biorg. Med. Chem.* **2004**, *12*, 6063.
- (10) Wu, Y.; Xiong, D.-C.; Chen, S.-C.; Wang, Y.-S.; Ye, X.-S. *Nat. Commun.* **2017**, *8*, 14851.
- (11) Wang, C.; Li, Q.; Wang, H.; Zhang, L.-H.; Ye, X.-S. *Tetrahedron* **2006**, *62*, 11657.
- (12) Kalikanda, J.; Li, Z. *Carbohydr. Res.* **2011**, *346*, 2380.
- (13) Zhu, Q.; Jiang, Y.; Lin, S.; Wen, L.; Wu, D.; Zhao, M.; Chen, F.; Jia, Y.; Yang, B. *Biomacromolecules* **2013**, *14*, 1999.
- (14) Charette, A. B.; Marcoux, J.-F.; Côté, B. *Tetrahedron Lett.* **1991**, *32*, 7215.
- (15) Yang, R.; He, H.; Chen, Z.; Huang, Y.; Xiao, G. *Org. Lett.* **2021**, *23*, 8257.
- (16) Hou, Z.; Lin, B.; Bao, Y.; Yan, H.-n.; Zhang, M.; Chang, X.-w.; Zhang, X.-x.; Wang, Z.-j.; Wei, G.-f.; Cheng, M.-s.; Liu, Y.; Guo, C. *Eur. J. Med. Chem.* **2017**, *132*, 1.
- (17) Kazakova, E. D.; Yashunsky, D. V.; Krylov, V. B.; Bouchara, J.-P.; Cornet, M.; Valsecchi, I.; Fontaine, T.; Latgé, J.-P.; Nifantiev, N. E. *J. Am. Chem. Soc.* **2020**, *142*, 1175.
- (18) Chen, J.; Hansen, T.; Zhang, Q.-J.; Liu, D.-Y.; Sun, Y.; Yan, H.; Codée, J. D. C.; Schmidt, R. R.; Sun, J.-S. *Angew. Chem. Int. Ed.* **2019**, *58*, 17000. *Angew. Chem.* **2019**, *131*, 17156.
- (19) Hsu, C.-H.; Chu, K.-C.; Lin, Y.-S.; Han, J.-L.; Peng, Y.-S.; Ren, C.-T.; Wu, C.-Y.; Wong, C.-H. *Chem. Eur. J.* **2010**, *16*, 1754.
- (20) He, H.; Xu, L.; Sun, R.; Zhang, Y.; Huang, Y.; Chen, Z.; Li, P.; Yang, R.; Xiao, G. *Chem. Sci.* **2021**, *12*, 5143.
- (21) Yuan, W.; Liu, Y.; Li, C. *Asian J. Org. Chem.* **2017**, *6*, 1428-1439.
- (22) Frisch, M. J.; Trucks, G. W.; Schlegel, H. B.; Scuseria, G. E.; Robb, M. A.; Cheeseman, J. R.; Scalmani, G.; Barone, V.; Mennucci, B.; Petersson, G. A.; Nakatsuji, H.; Caricato, M.; Li, X.; Hratchian, H. P.; Izmaylov, A. F.; Bloino, J.; Zheng, G.; Sonnenberg, J. L.; Hada, M.; Ehara, M.; Toyota, K.; Fukuda, R.; Hasegawa, J.; Ishida, M.; Nakajima, T.; Honda, Y.; Kitao, O.; Nakai, H.; Vreven, T.; Montgomery, J. A.; Peralta, J. E.; Ogliaro, F.; Bearpark, M.; Heyd, J. J.; Brothers, E.; Kudin, K. N.; Staroverov, V. N.; Keith, T.; Kobayashi, R.; Normand, J.; Raghavachari, K.; Rendell, A.; Burant, J. C.; Iyengar, S. S.; Tomasi, J.; Cossi, M.; Rega, N.; Millam, J. M.; Klene, M.; Knox, J. E.; Cross, J. B.; Bakken, V.; Adamo, C.; Jaramillo, J.; Gomperts, R.; Stratmann, R. E.; Yazyev, O.; Austin, A. J.; Cammi, R.; Pomelli, C.; Ochterski, J. W.; Martin, R. L.; Morokuma, K.; Zakrzewski, V. G.; Voth, G. A.; Salvador, P.; Dannenberg, J. J.; Dapprich, S.; Daniels, A. D.; Farkas, O.; Foresman, J. B.; Ortiz, J. V.; Cioslowski, J.; Fox, D. J. *Gaussian 09, Revision D.01*; Gaussian, Inc.: Wallingford, CT, 2009.
- (23) Zhao, Y.; Truhlar, D. G. *Theor. Chem. Acc.* **2008**, *120*, 215-241.

- 
- (24) Marenich, A. V.; Cramer, C. J.; Truhlar, D. G. *J. Phys. Chem. B* **2009**, *113*, 6378-6396.
- (25) (a) Pracht, P.; Bohle, F.; Grimme, S. *Phys. Chem. Chem. Phys.* **2020**, *22*, 7169-7192. (b) Bannwarth, C.; Ehlert, S.; Grimme, S. *J. Chem. Theory Comput.* **2019**, *15*, 1652-1671.
- (26) (a) Johnson, E. R.; Keinan, S.; Mori-Sánchez, P.; Contreras-García, J.; Cohen, A. J.; Yang, W. *J. Am. Chem. Soc.* **2010**, *132*, 6498-6506. (b) Contreras-García, J.; Johnson, E. R.; Keinan, S.; Chaudret, R.; Piquemal, J.; Beratan, D. N.; Yang, W. *J. Chem. Theory Comput.* **2011**, *7*, 625-632.
- (27) Legault, C. Y. CYLview, 1.0b, Université de Sherbrooke (2009).
- (28) Humphrey, W.; Dalke, A.; Schulten, K. *J. Mol. Graph.* **1996**, *14*, 33-38.

---

## Cartesian coordinates (Å) and energies of optimized structures

$\alpha$ -I

M06-2X SCF energy: -1438.60457362 a.u.  
M06-2X enthalpy: -1438.177163 a.u.  
M06-2X free energy: -1438.269530 a.u.  
M06-2X SCF energy in solution: -1439.05482081 a.u.  
M06-2X enthalpy in solution: -1438.627410 a.u.  
M06-2X free energy in solution: -1438.719777 a.u.  
Three lowest frequencies (cm<sup>-1</sup>): 13.9839 29.6537 31.9575

### Cartesian coordinates

| ATOM | X         | Y         | Z         |
|------|-----------|-----------|-----------|
| C    | -1.619004 | 3.026321  | -1.770657 |
| C    | -0.433210 | 2.322528  | -2.418735 |
| C    | 0.845537  | 3.138216  | -2.249268 |
| C    | 0.007189  | 4.195360  | -0.288865 |
| C    | -1.289185 | 3.393425  | -0.327394 |
| H    | -0.247877 | 1.383596  | -1.876696 |
| H    | -1.872646 | 3.935096  | -2.325804 |
| H    | -0.159998 | 5.149716  | -0.807794 |
| H    | -2.100982 | 3.974052  | 0.115806  |
| O    | 1.063839  | 3.494001  | -0.951066 |
| N    | -0.661447 | 2.052739  | -3.840054 |
| N    | -1.418782 | 1.102802  | -4.061868 |
| N    | -2.087718 | 0.254063  | -4.386035 |
| O    | -2.697526 | 2.099508  | -1.836335 |
| C    | -3.947593 | 2.604415  | -1.741941 |
| O    | -4.165862 | 3.780920  | -1.570876 |
| C    | -4.986678 | 1.552111  | -1.881525 |
| C    | -4.653205 | 0.201268  | -2.016212 |
| C    | -6.324964 | 1.953244  | -1.879098 |
| C    | -5.664096 | -0.745006 | -2.151153 |
| H    | -3.612962 | -0.106054 | -2.009774 |
| C    | -7.330703 | 1.003430  | -2.017352 |
| H    | -6.560956 | 3.007250  | -1.771586 |
| C    | -6.999690 | -0.344861 | -2.153543 |
| H    | -5.409851 | -1.795130 | -2.254438 |
| H    | -8.371187 | 1.312242  | -2.018986 |
| H    | -7.785249 | -1.086696 | -2.261452 |
| O    | -1.126018 | 2.163655  | 0.386888  |
| C    | -1.686065 | 2.074221  | 1.611403  |
| O    | -2.248844 | 2.997970  | 2.152699  |
| C    | -1.521988 | 0.723920  | 2.212130  |
| C    | -0.880620 | -0.318522 | 1.537135  |

---

|   |           |           |           |
|---|-----------|-----------|-----------|
| C | -2.040390 | 0.520385  | 3.493775  |
| C | -0.759482 | -1.561792 | 2.150129  |
| H | -0.480179 | -0.157041 | 0.542158  |
| C | -1.917385 | -0.723796 | 4.101245  |
| H | -2.536847 | 1.342188  | 3.999569  |
| C | -1.276215 | -1.764666 | 3.429294  |
| H | -0.261003 | -2.373516 | 1.630029  |
| H | -2.320724 | -0.882311 | 5.096328  |
| H | -1.178494 | -2.736586 | 3.903509  |
| C | 0.479181  | 4.473443  | 1.121936  |
| H | -0.363859 | 4.865947  | 1.711127  |
| H | 0.815280  | 3.533460  | 1.588756  |
| O | 1.529219  | 5.401253  | 1.054735  |
| C | 2.090598  | 5.646196  | 2.323521  |
| H | 2.508742  | 4.727659  | 2.759565  |
| H | 2.892236  | 6.375706  | 2.191035  |
| H | 1.345405  | 6.055497  | 3.020810  |
| H | 1.717223  | 2.599357  | -2.615565 |
| I | 0.848275  | 4.949583  | -3.605837 |

$\beta$ -I

M06-2X SCF energy: -1438.59906321 a.u.  
M06-2X enthalpy: -1438.172069 a.u.  
M06-2X free energy: -1438.265980 a.u.  
M06-2X SCF energy in solution: -1439.05002409 a.u.  
M06-2X enthalpy in solution: -1438.623030 a.u.  
M06-2X free energy in solution: -1438.716941 a.u.  
Three lowest frequencies (cm-1): 13.1482 21.9943 30.6398

Cartesian coordinates

| ATOM | X         | Y        | Z         |
|------|-----------|----------|-----------|
| C    | -1.606802 | 2.989976 | -1.754762 |
| C    | -0.428043 | 2.274476 | -2.422076 |
| C    | 0.800841  | 3.161850 | -2.263780 |
| C    | 0.023462  | 4.160897 | -0.290490 |
| C    | -1.283273 | 3.370779 | -0.315069 |
| H    | -0.251203 | 1.316916 | -1.917669 |
| H    | -1.852206 | 3.898078 | -2.315648 |
| H    | -0.128191 | 5.102621 | -0.838961 |
| H    | -2.096490 | 3.957789 | 0.117589  |
| H    | 0.697246  | 4.090249 | -2.838558 |
| O    | 1.057692  | 3.398329 | -0.917752 |



---

|   |           |           |           |
|---|-----------|-----------|-----------|
| N | -0.701368 | 2.089916  | -3.852497 |
| N | -1.438512 | 1.134365  | -4.108982 |
| N | -2.095163 | 0.283714  | -4.453899 |
| O | -2.695036 | 2.074319  | -1.821940 |
| C | -3.940878 | 2.592770  | -1.756089 |
| O | -4.150906 | 3.772689  | -1.597064 |
| C | -4.987707 | 1.550093  | -1.910368 |
| C | -4.663049 | 0.199132  | -2.064082 |
| C | -6.323210 | 1.960377  | -1.904157 |
| C | -5.680105 | -0.738314 | -2.213291 |
| H | -3.624721 | -0.114575 | -2.062309 |
| C | -7.335216 | 1.019224  | -2.055508 |
| H | -6.552005 | 3.014382  | -1.782043 |
| C | -7.013011 | -0.329250 | -2.210205 |
| H | -5.432783 | -1.788406 | -2.332365 |
| H | -8.373670 | 1.334801  | -2.053004 |
| H | -7.803316 | -1.064428 | -2.328380 |
| O | -1.126545 | 2.147724  | 0.410184  |
| C | -1.670983 | 2.074838  | 1.641043  |
| O | -2.222689 | 3.006645  | 2.180736  |
| C | -1.506400 | 0.728427  | 2.251290  |
| C | -0.864878 | -0.317217 | 1.581231  |
| C | -2.022545 | 0.531715  | 3.534809  |
| C | -0.741769 | -1.556961 | 2.200856  |
| H | -0.464567 | -0.159993 | 0.585524  |
| C | -1.897956 | -0.709219 | 4.148772  |
| H | -2.518619 | 1.356008  | 4.036979  |
| C | -1.257000 | -1.753363 | 3.481639  |
| H | -0.242702 | -2.370738 | 1.684534  |
| H | -2.299879 | -0.862827 | 5.145211  |
| H | -1.158019 | -2.722686 | 3.960944  |
| C | 0.487395  | 4.474714  | 1.115644  |
| H | -0.352681 | 4.899336  | 1.686671  |
| H | 0.802654  | 3.542269  | 1.610962  |
| O | 1.554710  | 5.381667  | 1.032322  |
| C | 2.112464  | 5.647636  | 2.298342  |
| H | 2.514198  | 4.733369  | 2.758156  |
| H | 2.925890  | 6.361794  | 2.153950  |
| H | 1.369671  | 6.083916  | 2.981883  |
| I | 2.574568  | 2.192008  | -3.089725 |

EtOH

---

M06-2X SCF energy: -154.95933303 a.u.  
M06-2X enthalpy: -154.873046 a.u.  
M06-2X free energy: -154.903432 a.u.  
M06-2X SCF energy in solution: -155.02019768 a.u.  
M06-2X enthalpy in solution: -154.933911 a.u.  
M06-2X free energy in solution: -154.964297 a.u.  
Three lowest frequencies (cm-1): 266.0407 350.8119 425.1683

Cartesian coordinates

| ATOM | X        | Y         | Z         |
|------|----------|-----------|-----------|
| C    | 2.220606 | -2.881861 | -7.844016 |
| H    | 2.575415 | -3.917062 | -7.855148 |
| H    | 2.572385 | -2.383121 | -8.752198 |
| H    | 1.126330 | -2.892366 | -7.854148 |
| C    | 2.728399 | -2.164524 | -6.610845 |
| H    | 3.828031 | -2.144583 | -6.611972 |
| H    | 2.380475 | -1.121315 | -6.611326 |
| O    | 2.238342 | -2.858397 | -5.472867 |
| H    | 2.563167 | -2.396832 | -4.684741 |

Ph<sub>3</sub>P=O

M06-2X SCF energy: -1111.21361153 a.u.  
M06-2X enthalpy: -1110.914308 a.u.  
M06-2X free energy: -1110.978631 a.u.  
M06-2X SCF energy in solution: -1111.44366327 a.u.  
M06-2X enthalpy in solution: -1111.144360 a.u.  
M06-2X free energy in solution: -1111.208683 a.u.  
Three lowest frequencies (cm-1): 25.8459 28.3885 39.5182

Cartesian coordinates

| ATOM | X         | Y        | Z         |
|------|-----------|----------|-----------|
| P    | -0.771397 | 0.965232 | 1.007852  |
| O    | 0.691558  | 1.115202 | 0.703258  |
| C    | -1.776808 | 2.319473 | 0.330645  |
| C    | -3.084661 | 2.143131 | -0.130467 |
| C    | -1.196095 | 3.592083 | 0.305018  |
| C    | -3.809528 | 3.235520 | -0.602161 |
| H    | -3.538760 | 1.155537 | -0.128528 |
| C    | -1.922524 | 4.680590 | -0.168809 |
| H    | -0.173091 | 3.723019 | 0.648211  |
| C    | -3.229964 | 4.502561 | -0.619359 |
| H    | -4.824531 | 3.095339 | -0.961523 |

---

|   |           |           |           |
|---|-----------|-----------|-----------|
| H | -1.468724 | 5.666870  | -0.188933 |
| H | -3.796451 | 5.352541  | -0.988504 |
| C | -1.121707 | 0.932510  | 2.792123  |
| C | -2.302548 | 1.437131  | 3.345326  |
| C | -0.159850 | 0.346538  | 3.622042  |
| C | -2.524846 | 1.341211  | 4.717352  |
| H | -3.048349 | 1.907619  | 2.709332  |
| C | -0.384029 | 0.255259  | 4.992822  |
| H | 0.765222  | -0.027710 | 3.191318  |
| C | -1.567725 | 0.749446  | 5.539486  |
| H | -3.443007 | 1.733734  | 5.143775  |
| H | 0.364830  | -0.198172 | 5.635232  |
| H | -1.742669 | 0.677356  | 6.608917  |
| C | -1.470014 | -0.575375 | 0.343386  |
| C | -2.589707 | -1.194564 | 0.907321  |
| C | -0.856263 | -1.136257 | -0.780621 |
| C | -3.100486 | -2.359314 | 0.340766  |
| H | -3.060568 | -0.773066 | 1.792001  |
| C | -1.367282 | -2.304018 | -1.342207 |
| H | 0.025259  | -0.660984 | -1.202648 |
| C | -2.490139 | -2.912605 | -0.783788 |
| H | -3.969459 | -2.838102 | 0.781775  |
| H | -0.887801 | -2.740838 | -2.213055 |
| H | -2.886884 | -3.823997 | -1.221254 |

TS1

M06-2X SCF energy: -1593.55703236 a.u.  
M06-2X enthalpy: -1593.042701 a.u.  
M06-2X free energy: -1593.148955 a.u.  
M06-2X SCF energy in solution: -1594.06312828 a.u.  
M06-2X enthalpy in solution: -1593.548797 a.u.  
M06-2X free energy in solution: -1593.655051 a.u.  
Three lowest frequencies (cm-1): -108.7899 16.9269 23.7794  
Imaginary frequency: -108.7899 cm-1

Cartesian coordinates

| ATOM | X         | Y         | Z         |
|------|-----------|-----------|-----------|
| C    | 0.145963  | -1.430545 | 0.570928  |
| C    | -0.760530 | -1.202611 | -0.633248 |
| C    | -2.199858 | -1.162054 | -0.202006 |
| C    | -1.638576 | -0.485144 | 2.055177  |
| C    | -0.191041 | -0.370997 | 1.616661  |

---

|   |           |           |           |
|---|-----------|-----------|-----------|
| H | -0.518364 | -0.215114 | -1.044632 |
| H | 0.022405  | -2.434169 | 0.983228  |
| H | -1.736199 | -1.316291 | 2.758043  |
| H | 0.442448  | -0.488929 | 2.499103  |
| H | -2.980257 | -1.544898 | -0.849428 |
| O | -2.562904 | -0.859267 | 0.973049  |
| N | -0.630194 | -2.245189 | -1.650527 |
| N | 0.307532  | -2.040974 | -2.434476 |
| N | 1.131937  | -1.957031 | -3.196668 |
| O | 1.459929  | -1.238532 | 0.070559  |
| C | 2.475953  | -1.696643 | 0.846378  |
| O | 2.283172  | -2.324867 | 1.858879  |
| C | 3.803434  | -1.340574 | 0.288255  |
| C | 3.934003  | -0.470485 | -0.798181 |
| C | 4.934926  | -1.890230 | 0.895569  |
| C | 5.202572  | -0.152410 | -1.272178 |
| H | 3.051807  | -0.043001 | -1.263197 |
| C | 6.199433  | -1.574591 | 0.412395  |
| H | 4.809931  | -2.561172 | 1.739617  |
| C | 6.332602  | -0.704672 | -0.669815 |
| H | 5.309172  | 0.527965  | -2.111015 |
| H | 7.080588  | -2.003629 | 0.878696  |
| H | 7.320850  | -0.454799 | -1.044221 |
| O | 0.023789  | 0.914486  | 1.033843  |
| C | 1.251405  | 1.466495  | 1.220768  |
| O | 2.090579  | 0.966860  | 1.932658  |
| C | 1.426085  | 2.728758  | 0.461696  |
| C | 0.414849  | 3.257777  | -0.345013 |
| C | 2.662467  | 3.373367  | 0.565009  |
| C | 0.645335  | 4.439432  | -1.042956 |
| H | -0.541388 | 2.750932  | -0.431795 |
| C | 2.885003  | 4.553781  | -0.133412 |
| H | 3.435276  | 2.937947  | 1.190478  |
| C | 1.875904  | 5.086394  | -0.936729 |
| H | -0.136794 | 4.852082  | -1.672442 |
| H | 3.843247  | 5.057302  | -0.054402 |
| H | 2.051263  | 6.008333  | -1.483259 |
| C | -2.190108 | 0.784605  | 2.667497  |
| H | -1.460128 | 1.159296  | 3.403015  |
| H | -2.311450 | 1.549148  | 1.886630  |
| O | -3.412630 | 0.463962  | 3.269292  |
| C | -4.062113 | 1.610171  | 3.777615  |
| H | -4.288006 | 2.326483  | 2.976174  |
| H | -4.995354 | 1.276060  | 4.234788  |

---

|   |           |           |           |
|---|-----------|-----------|-----------|
| H | -3.447105 | 2.111055  | 4.538378  |
| I | -3.066241 | 1.285515  | -1.708572 |
| C | -2.628962 | -5.069769 | -1.148460 |
| H | -2.592518 | -4.277499 | -1.902218 |
| H | -2.344656 | -6.014954 | -1.621467 |
| H | -3.660518 | -5.167159 | -0.791327 |
| C | -1.692206 | -4.747840 | -0.000854 |
| H | -1.696104 | -5.551111 | 0.746869  |
| H | -0.667571 | -4.623063 | -0.359577 |
| O | -2.030161 | -3.510044 | 0.628546  |
| H | -2.918187 | -3.604817 | 1.014783  |

TS2

M06-2X SCF energy: -1593.55202062 a.u.  
M06-2X enthalpy: -1593.036514 a.u.  
M06-2X free energy: -1593.141889 a.u.  
M06-2X SCF energy in solution: -1594.05499449 a.u.  
M06-2X enthalpy in solution: -1593.539488 a.u.  
M06-2X free energy in solution: -1593.644863 a.u.  
Three lowest frequencies (cm-1): -233.7037 11.6846 22.2783  
Imaginary frequency: -233.7037 cm-1

Cartesian coordinates

| ATOM | X         | Y         | Z         |
|------|-----------|-----------|-----------|
| C    | 0.365887  | -0.774385 | -0.267932 |
| C    | 0.774157  | -0.164017 | 1.067969  |
| C    | 1.984273  | 0.730631  | 0.913906  |
| C    | 1.682927  | 0.949651  | -1.481902 |
| C    | 0.305891  | 0.350263  | -1.295431 |
| H    | -0.049038 | 0.485974  | 1.389036  |
| H    | 1.073691  | -1.545676 | -0.586244 |
| H    | 2.332192  | 0.226231  | -1.985004 |
| H    | -0.052368 | -0.018697 | -2.258887 |
| O    | 2.369812  | 1.198388  | -0.207943 |
| N    | 1.072056  | -1.169287 | 2.088787  |
| N    | 0.056285  | -1.592480 | 2.656968  |
| N    | -0.794678 | -2.047059 | 3.238663  |
| O    | -0.918358 | -1.331202 | -0.023334 |
| C    | -1.386994 | -2.179237 | -0.974551 |
| O    | -0.748692 | -2.455768 | -1.961112 |
| C    | -2.731531 | -2.713973 | -0.646509 |
| C    | -3.425885 | -2.334939 | 0.505997  |

---

|   |           |           |           |
|---|-----------|-----------|-----------|
| C | -3.291236 | -3.630404 | -1.540606 |
| C | -4.681184 | -2.879289 | 0.759065  |
| H | -2.988033 | -1.623248 | 1.198168  |
| C | -4.544590 | -4.171276 | -1.282017 |
| H | -2.732729 | -3.909222 | -2.428074 |
| C | -5.239072 | -3.795986 | -0.131950 |
| H | -5.224949 | -2.590538 | 1.652848  |
| H | -4.979387 | -4.884854 | -1.974473 |
| H | -6.218092 | -4.219946 | 0.070508  |
| O | -0.563206 | 1.371252  | -0.798649 |
| C | -1.872743 | 1.290030  | -1.149229 |
| O | -2.288718 | 0.484879  | -1.947162 |
| C | -2.701676 | 2.298609  | -0.442643 |
| C | -2.166848 | 3.136885  | 0.540576  |
| C | -4.055623 | 2.375197  | -0.779869 |
| C | -2.993488 | 4.054828  | 1.180795  |
| H | -1.116370 | 3.062026  | 0.805046  |
| C | -4.874856 | 3.296357  | -0.138207 |
| H | -4.450568 | 1.709007  | -1.540164 |
| C | -4.343592 | 4.136284  | 0.840830  |
| H | -2.585053 | 4.708435  | 1.945216  |
| H | -5.926550 | 3.359233  | -0.398692 |
| H | -4.984777 | 4.855165  | 1.342098  |
| C | 1.672881  | 2.260768  | -2.236299 |
| H | 1.076661  | 2.117873  | -3.151988 |
| H | 1.183921  | 3.040922  | -1.632706 |
| O | 2.998285  | 2.597733  | -2.530440 |
| C | 3.081991  | 3.784933  | -3.288980 |
| H | 2.647665  | 4.637043  | -2.747328 |
| H | 4.140366  | 3.978261  | -3.472094 |
| H | 2.562879  | 3.678985  | -4.251680 |
| H | 2.726732  | 0.767254  | 1.708477  |
| I | 4.129900  | -1.817039 | 0.089021  |
| C | 0.562196  | 1.759187  | 3.875936  |
| H | 0.606781  | 2.055477  | 4.927473  |
| H | -0.490419 | 1.704878  | 3.578734  |
| H | 1.015563  | 0.766729  | 3.788697  |
| C | 1.302270  | 2.779266  | 3.042169  |
| H | 0.894089  | 3.782780  | 3.193846  |
| H | 2.370826  | 2.792638  | 3.280953  |
| O | 1.130874  | 2.450872  | 1.643804  |
| H | 1.567710  | 3.142584  | 1.109169  |

---

$\alpha$ -anomer  
M06-2X SCF energy: -1581.66750963 a.u.  
M06-2X enthalpy: -1581.165947 a.u.  
M06-2X free energy: -1581.261751 a.u.  
M06-2X SCF energy in solution: -1582.11547095 a.u.  
M06-2X enthalpy in solution: -1581.613908 a.u.  
M06-2X free energy in solution: -1581.709712 a.u.  
Three lowest frequencies (cm-1): 20.0228 23.2778 29.6629

Cartesian coordinates

| ATOM | X         | Y         | Z         |
|------|-----------|-----------|-----------|
| C    | -1.953316 | 2.852598  | -2.168978 |
| C    | -0.829879 | 2.130632  | -2.901918 |
| C    | 0.296848  | 3.122078  | -3.197901 |
| C    | -0.212454 | 4.388593  | -1.245768 |
| C    | -1.407858 | 3.507435  | -0.900441 |
| H    | -0.424954 | 1.346842  | -2.250730 |
| H    | -2.407138 | 3.610684  | -2.812795 |
| H    | -0.580851 | 5.231610  | -1.845298 |
| H    | -2.188099 | 4.088487  | -0.403041 |
| O    | 0.766641  | 3.660882  | -1.981946 |
| N    | -1.304043 | 1.554333  | -4.171701 |
| N    | -1.934838 | 0.503033  | -4.035507 |
| N    | -2.519323 | -0.463441 | -4.026274 |
| O    | -2.913934 | 1.850220  | -1.839915 |
| C    | -4.162583 | 2.278132  | -1.545489 |
| O    | -4.501677 | 3.432691  | -1.650757 |
| C    | -5.046229 | 1.166624  | -1.105371 |
| C    | -4.559905 | -0.128011 | -0.904527 |
| C    | -6.392066 | 1.459510  | -0.875330 |
| C    | -5.427028 | -1.127239 | -0.473025 |
| H    | -3.511930 | -0.347526 | -1.081784 |
| C    | -7.254812 | 0.456815  | -0.447895 |
| H    | -6.746052 | 2.473461  | -1.032920 |
| C    | -6.771900 | -0.835855 | -0.246120 |
| H    | -5.052904 | -2.133840 | -0.313866 |
| H    | -8.301515 | 0.682086  | -0.268824 |
| H    | -7.445207 | -1.618610 | 0.090864  |
| O    | -0.947829 | 2.469570  | -0.022683 |
| C    | -1.830581 | 1.966873  | 0.862396  |
| O    | -2.949356 | 2.402782  | 1.013731  |
| C    | -1.266661 | 0.820681  | 1.626147  |
| C    | 0.068930  | 0.429401  | 1.496656  |

---

|   |           |           |           |
|---|-----------|-----------|-----------|
| C | -2.125352 | 0.128859  | 2.484010  |
| C | 0.541850  | -0.651645 | 2.233824  |
| H | 0.729588  | 0.969819  | 0.826593  |
| C | -1.648952 | -0.954377 | 3.213287  |
| H | -3.160266 | 0.446984  | 2.563499  |
| C | -0.315195 | -1.342995 | 3.089240  |
| H | 1.579619  | -0.956161 | 2.140193  |
| H | -2.315266 | -1.496548 | 3.877064  |
| H | 0.056891  | -2.188394 | 3.660671  |
| C | 0.468061  | 4.930063  | -0.006059 |
| H | -0.293717 | 5.321963  | 0.687318  |
| H | 1.006516  | 4.117086  | 0.502804  |
| O | 1.354796  | 5.948702  | -0.396740 |
| C | 2.061304  | 6.475691  | 0.702759  |
| H | 2.662375  | 5.701298  | 1.200537  |
| H | 2.726116  | 7.254098  | 0.322465  |
| H | 1.377543  | 6.915886  | 1.442904  |
| H | 1.158906  | 2.602763  | -3.634472 |
| O | -0.200206 | 4.082112  | -4.068375 |
| C | 0.785315  | 4.908617  | -4.692035 |
| H | 0.378513  | 5.154935  | -5.677189 |
| H | 1.703171  | 4.324822  | -4.842827 |
| C | 1.071169  | 6.174780  | -3.904815 |
| H | 1.504959  | 5.949858  | -2.926611 |
| H | 1.771382  | 6.803557  | -4.465104 |
| H | 0.148236  | 6.745207  | -3.757106 |

$\beta$ -anomer

M06-2X SCF energy: -1581.66105663 a.u.  
M06-2X enthalpy: -1581.159556 a.u.  
M06-2X free energy: -1581.258953 a.u.  
M06-2X SCF energy in solution: -1582.11188236 a.u.  
M06-2X enthalpy in solution: -1581.610382 a.u.  
M06-2X free energy in solution: -1581.709779 a.u.  
Three lowest frequencies (cm<sup>-1</sup>): 11.8930 20.2896 24.0610

Cartesian coordinates

| ATOM | X         | Y        | Z         |
|------|-----------|----------|-----------|
| C    | -1.713840 | 2.941248 | -1.798740 |
| C    | -0.548495 | 2.209140 | -2.459383 |
| C    | 0.718190  | 3.051102 | -2.321719 |
| C    | -0.065186 | 4.106543 | -0.355804 |



---

|   |           |           |           |
|---|-----------|-----------|-----------|
| C | -1.388019 | 3.337641  | -0.363507 |
| H | -0.375865 | 1.248507  | -1.958933 |
| H | -1.947907 | 3.848345  | -2.366483 |
| H | -0.209412 | 5.036611  | -0.928928 |
| H | -2.194449 | 3.940924  | 0.059163  |
| O | 0.947674  | 3.316160  | -0.953132 |
| N | -0.819986 | 2.020099  | -3.894800 |
| N | -1.582745 | 1.086068  | -4.148433 |
| N | -2.261378 | 0.250938  | -4.492646 |
| O | -2.821644 | 2.044876  | -1.859860 |
| C | -4.055682 | 2.586894  | -1.789447 |
| O | -4.244553 | 3.770654  | -1.629604 |
| C | -5.124813 | 1.565211  | -1.939780 |
| C | -4.828465 | 0.209555  | -2.107336 |
| C | -6.451882 | 2.001233  | -1.915878 |
| C | -5.865182 | -0.706556 | -2.252586 |
| H | -3.796223 | -0.123655 | -2.119507 |
| C | -7.483725 | 1.081377  | -2.062554 |
| H | -6.658330 | 3.058686  | -1.783177 |
| C | -7.189686 | -0.271801 | -2.231192 |
| H | -5.639655 | -1.760315 | -2.383003 |
| H | -8.515806 | 1.417236  | -2.045758 |
| H | -7.995445 | -0.990816 | -2.345922 |
| O | -1.250969 | 2.121340  | 0.379485  |
| C | -1.743207 | 2.094088  | 1.632367  |
| O | -2.251300 | 3.051623  | 2.170392  |
| C | -1.582192 | 0.759485  | 2.271286  |
| C | -0.971247 | -0.309812 | 1.610338  |
| C | -2.064519 | 0.600257  | 3.572907  |
| C | -0.844646 | -1.535329 | 2.256454  |
| H | -0.596457 | -0.180857 | 0.600687  |
| C | -1.937299 | -0.626930 | 4.213250  |
| H | -2.537014 | 1.442539  | 4.068342  |
| C | -1.326630 | -1.694453 | 3.555122  |
| H | -0.368301 | -2.366980 | 1.746812  |
| H | -2.313539 | -0.751940 | 5.223766  |
| H | -1.225517 | -2.653135 | 4.055301  |
| C | 0.393992  | 4.466349  | 1.041793  |
| H | -0.428597 | 4.960925  | 1.580271  |
| H | 0.659698  | 3.547773  | 1.589605  |
| O | 1.507396  | 5.315659  | 0.927646  |
| C | 2.017167  | 5.676838  | 2.190561  |
| H | 2.347064  | 4.793874  | 2.756643  |
| H | 2.873986  | 6.332760  | 2.021476  |

---

|   |          |          |           |
|---|----------|----------|-----------|
| H | 1.266407 | 6.213844 | 2.788369  |
| H | 0.595821 | 4.008201 | -2.864143 |
| O | 1.779413 | 2.328796 | -2.816974 |
| C | 2.988507 | 3.083682 | -2.902581 |
| H | 3.288647 | 3.410793 | -1.900885 |
| H | 2.810017 | 3.979713 | -3.514249 |
| C | 4.043086 | 2.198012 | -3.528167 |
| H | 3.734785 | 1.879189 | -4.528014 |
| H | 4.988132 | 2.742287 | -3.611496 |
| H | 4.209102 | 1.307968 | -2.914226 |

TS3

M06-2X SCF energy: -2549.80888805 a.u.  
M06-2X enthalpy: -2549.081576 a.u.  
M06-2X free energy: -2549.216405 a.u.  
M06-2X SCF energy in solution: -2550.49481485 a.u.  
M06-2X enthalpy in solution: -2549.767503 a.u.  
M06-2X free energy in solution: -2549.902332 a.u.  
Three lowest frequencies (cm-1): -207.2552 15.3226 16.2647  
Imaginary frequency: -207.2552 cm-1

Cartesian coordinates

| ATOM | X         | Y         | Z         |
|------|-----------|-----------|-----------|
| C    | -1.833114 | -1.332956 | -0.440095 |
| C    | -0.579336 | -1.033471 | 0.377063  |
| C    | 0.635999  | -1.616060 | -0.294214 |
| C    | -0.408384 | -1.674346 | -2.472288 |
| C    | -1.562509 | -0.891890 | -1.877564 |
| H    | -0.432994 | 0.054529  | 0.367129  |
| H    | -2.102040 | -2.392703 | -0.393637 |
| H    | -0.743954 | -2.681200 | -2.736509 |
| H    | -2.444781 | -1.039051 | -2.505524 |
| O    | 0.679848  | -1.919800 | -1.520283 |
| N    | -0.610744 | -1.534248 | 1.750527  |
| N    | -1.465194 | -0.999589 | 2.464930  |
| N    | -2.208775 | -0.598954 | 3.212280  |
| O    | -2.836462 | -0.518895 | 0.150051  |
| C    | -4.124074 | -0.792274 | -0.182002 |
| O    | -4.424740 | -1.707567 | -0.907921 |
| C    | -5.071379 | 0.153782  | 0.458481  |
| C    | -4.628643 | 1.213326  | 1.255960  |
| C    | -6.436298 | -0.042149 | 0.235411  |

---

|   |           |           |           |
|---|-----------|-----------|-----------|
| C | -5.559156 | 2.073237  | 1.830773  |
| H | -3.567328 | 1.364124  | 1.424197  |
| C | -7.361084 | 0.819740  | 0.813563  |
| H | -6.755715 | -0.870797 | -0.388380 |
| C | -6.922110 | 1.876740  | 1.610792  |
| H | -5.221613 | 2.897910  | 2.450435  |
| H | -8.422254 | 0.668822  | 0.643018  |
| H | -7.644686 | 2.550892  | 2.060840  |
| O | -1.205075 | 0.490240  | -1.840569 |
| C | -2.213490 | 1.393639  | -1.925107 |
| O | -3.333237 | 1.100732  | -2.270713 |
| C | -1.767052 | 2.753468  | -1.531228 |
| C | -0.463184 | 2.995813  | -1.085313 |
| C | -2.705821 | 3.786986  | -1.580748 |
| C | -0.106798 | 4.280691  | -0.684232 |
| H | 0.258197  | 2.181881  | -1.054126 |
| C | -2.340665 | 5.068464  | -1.184036 |
| H | -3.713302 | 3.571670  | -1.922634 |
| C | -1.042902 | 5.313896  | -0.735033 |
| H | 0.903174  | 4.476615  | -0.333797 |
| H | -3.066762 | 5.874428  | -1.221799 |
| H | -0.759563 | 6.314532  | -0.422538 |
| C | 0.223604  | -0.993631 | -3.667608 |
| H | -0.581199 | -0.674087 | -4.348964 |
| H | 0.766900  | -0.098598 | -3.331278 |
| O | 1.080458  | -1.915667 | -4.280303 |
| C | 1.766117  | -1.345730 | -5.373751 |
| H | 2.402732  | -0.509014 | -5.053251 |
| H | 2.392667  | -2.127697 | -5.806811 |
| H | 1.064849  | -0.980590 | -6.137221 |
| H | 1.468042  | -1.977485 | 0.303938  |
| I | -0.157490 | -4.824253 | 0.298354  |
| P | 2.657198  | 0.837443  | 0.458798  |
| O | 1.669015  | 0.291216  | -0.570231 |
| C | 1.995324  | 0.724731  | 2.134434  |
| C | 2.410782  | -0.283487 | 3.007506  |
| C | 0.922312  | 1.558548  | 2.485330  |
| C | 1.760381  | -0.455549 | 4.228580  |
| H | 3.230951  | -0.942195 | 2.737562  |
| C | 0.282435  | 1.386362  | 3.707314  |
| H | 0.590061  | 2.339514  | 1.803180  |
| C | 0.700354  | 0.376221  | 4.577017  |
| H | 2.081312  | -1.243701 | 4.902051  |
| H | -0.550408 | 2.027531  | 3.978916  |

---

|   |          |           |           |
|---|----------|-----------|-----------|
| H | 0.190700 | 0.235661  | 5.525439  |
| C | 3.033180 | 2.568861  | 0.099465  |
| C | 3.303558 | 3.507526  | 1.099788  |
| C | 3.106593 | 2.936574  | -1.249656 |
| C | 3.639553 | 4.813622  | 0.746924  |
| H | 3.246222 | 3.227364  | 2.148221  |
| C | 3.447247 | 4.240489  | -1.595012 |
| H | 2.888637 | 2.203404  | -2.022203 |
| C | 3.712123 | 5.178261  | -0.596525 |
| H | 3.841666 | 5.545639  | 1.522455  |
| H | 3.500377 | 4.526329  | -2.640788 |
| H | 3.974049 | 6.196745  | -0.866641 |
| C | 4.213104 | -0.078305 | 0.406737  |
| C | 5.277959 | 0.255170  | 1.252102  |
| C | 4.342661 | -1.116955 | -0.517641 |
| C | 6.467633 | -0.459904 | 1.174627  |
| H | 5.174287 | 1.065753  | 1.970744  |
| C | 5.538463 | -1.829849 | -0.590291 |
| H | 3.515212 | -1.359034 | -1.179477 |
| C | 6.596050 | -1.501814 | 0.253835  |
| H | 7.295496 | -0.206321 | 1.829055  |
| H | 5.641331 | -2.638249 | -1.306958 |
| H | 7.526662 | -2.058050 | 0.196085  |

Int1

M06-2X SCF energy: -2549.84253505 a.u.  
M06-2X enthalpy: -2549.112688 a.u.  
M06-2X free energy: -2549.247762 a.u.  
M06-2X SCF energy in solution: -2550.52616110 a.u.  
M06-2X enthalpy in solution: -2549.796314 a.u.  
M06-2X free energy in solution: -2549.931388 a.u.  
Three lowest frequencies (cm-1): 15.4197 17.1265 18.7516

Cartesian coordinates

| ATOM | X         | Y        | Z         |
|------|-----------|----------|-----------|
| C    | -1.912333 | 3.490247 | -1.244631 |
| C    | -0.690758 | 2.888499 | -1.930116 |
| C    | 0.502156  | 3.801071 | -1.645604 |
| C    | -0.335006 | 4.579216 | 0.383912  |
| C    | -1.627578 | 3.785293 | 0.234538  |
| H    | -0.476221 | 1.895606 | -1.515806 |
| H    | -2.201343 | 4.417537 | -1.750224 |

---

|   |           |           |           |
|---|-----------|-----------|-----------|
| H | -0.476242 | 5.569287  | -0.076247 |
| H | -2.469361 | 4.325244  | 0.674749  |
| H | 0.330294  | 4.794580  | -2.086888 |
| O | 0.724145  | 3.892278  | -0.276432 |
| N | -0.957602 | 2.834539  | -3.373334 |
| N | -0.253909 | 2.027772  | -3.991037 |
| N | 0.333278  | 1.328550  | -4.653184 |
| O | -2.959733 | 2.533415  | -1.345920 |
| C | -4.220453 | 3.006163  | -1.210850 |
| O | -4.476149 | 4.186578  | -1.171517 |
| C | -5.224180 | 1.914337  | -1.123191 |
| C | -4.846092 | 0.575453  | -0.990904 |
| C | -6.574713 | 2.269425  | -1.131012 |
| C | -5.825059 | -0.405729 | -0.868000 |
| H | -3.794827 | 0.307133  | -0.975520 |
| C | -7.549198 | 1.284507  | -1.014195 |
| H | -6.845236 | 3.316406  | -1.224579 |
| C | -7.174137 | -0.052206 | -0.881389 |
| H | -5.535149 | -1.446098 | -0.758433 |
| H | -8.599642 | 1.557713  | -1.022108 |
| H | -7.935371 | -0.820510 | -0.784417 |
| O | -1.444926 | 2.535839  | 0.906258  |
| C | -2.530278 | 1.975758  | 1.481276  |
| O | -3.604960 | 2.526632  | 1.553178  |
| C | -2.245400 | 0.617302  | 2.012727  |
| C | -0.970504 | 0.047991  | 1.946566  |
| C | -3.308881 | -0.092226 | 2.577204  |
| C | -0.763567 | -1.231421 | 2.452702  |
| H | -0.151113 | 0.603502  | 1.502695  |
| C | -3.096341 | -1.370890 | 3.079240  |
| H | -4.291485 | 0.367721  | 2.611528  |
| C | -1.823714 | -1.939016 | 3.018675  |
| H | 0.224833  | -1.677322 | 2.404662  |
| H | -3.920289 | -1.923906 | 3.518973  |
| H | -1.658645 | -2.937337 | 3.412716  |
| C | 0.090356  | 4.759483  | 1.824600  |
| H | -0.751987 | 5.165962  | 2.406202  |
| H | 0.365218  | 3.783522  | 2.250459  |
| O | 1.186297  | 5.639833  | 1.838657  |
| C | 1.714818  | 5.797535  | 3.136858  |
| H | 2.087772  | 4.843375  | 3.534174  |
| H | 2.543587  | 6.505502  | 3.068753  |
| H | 0.960528  | 6.195604  | 3.830181  |
| O | 1.660759  | 3.201150  | -2.194521 |

---

|   |           |           |           |
|---|-----------|-----------|-----------|
| P | 2.796317  | 4.018438  | -3.021021 |
| C | 4.270682  | 3.077948  | -2.679485 |
| C | 5.465849  | 3.732776  | -2.371324 |
| C | 4.204450  | 1.678765  | -2.740191 |
| C | 6.606587  | 2.975188  | -2.120098 |
| H | 5.508327  | 4.816973  | -2.334090 |
| C | 5.350019  | 0.936043  | -2.484558 |
| H | 3.269516  | 1.180116  | -2.983196 |
| C | 6.546959  | 1.585051  | -2.175963 |
| H | 7.540180  | 3.475205  | -1.885107 |
| H | 5.310534  | -0.147423 | -2.526884 |
| H | 7.439970  | 1.000292  | -1.977570 |
| C | 2.873690  | 5.698596  | -2.422794 |
| C | 2.993991  | 6.753443  | -3.335813 |
| C | 2.848050  | 5.941720  | -1.039656 |
| C | 3.088963  | 8.057695  | -2.860217 |
| H | 3.026599  | 6.559048  | -4.402994 |
| C | 2.923013  | 7.251787  | -0.582646 |
| H | 2.735216  | 5.130292  | -0.327325 |
| C | 3.049213  | 8.304859  | -1.489929 |
| H | 3.192579  | 8.876360  | -3.564381 |
| H | 2.878608  | 7.446515  | 0.483806  |
| H | 3.114840  | 9.325168  | -1.124563 |
| C | 2.322879  | 3.956835  | -4.741706 |
| C | 3.058933  | 3.199623  | -5.657778 |
| C | 1.145404  | 4.612854  | -5.131920 |
| C | 2.601360  | 3.083174  | -6.967111 |
| H | 3.982451  | 2.714955  | -5.356060 |
| C | 0.695145  | 4.481679  | -6.439248 |
| H | 0.584325  | 5.217852  | -4.422966 |
| C | 1.421298  | 3.714429  | -7.351864 |
| H | 3.170775  | 2.502127  | -7.684695 |
| H | -0.217015 | 4.981881  | -6.747469 |
| H | 1.066218  | 3.617370  | -8.373148 |
| I | 6.002977  | 5.811929  | -5.667958 |

TS4

M06-2X SCF energy: -2704.78790478 a.u.

M06-2X enthalpy: -2703.971293 a.u.

M06-2X free energy: -2704.117478 a.u.

M06-2X SCF energy in solution: -2705.53143144 a.u.

M06-2X enthalpy in solution: -2704.714820 a.u.

---

M06-2X free energy in solution: -2704.861005 a.u.  
Three lowest frequencies (cm-1): -226.9560 7.2070 19.8614  
Imaginary frequency: -226.9560 cm-1

Cartesian coordinates

| ATOM | X         | Y         | Z         |
|------|-----------|-----------|-----------|
| C    | 1.522199  | -1.935835 | 0.807834  |
| C    | 0.381017  | -1.276873 | 0.042096  |
| C    | -0.824336 | -1.111061 | 0.928751  |
| C    | 0.470875  | -1.228449 | 2.969440  |
| C    | 1.720368  | -1.165951 | 2.111104  |
| H    | 0.701355  | -0.265034 | -0.234255 |
| H    | 1.313525  | -2.991460 | 0.999380  |
| H    | 0.405351  | -2.210972 | 3.444609  |
| H    | 2.557193  | -1.574466 | 2.682942  |
| O    | -0.771323 | -1.131483 | 2.195721  |
| N    | -0.027391 | -2.034985 | -1.140817 |
| N    | 0.738389  | -1.894688 | -2.102014 |
| N    | 1.364815  | -1.854046 | -3.037721 |
| O    | 2.647849  | -1.779483 | -0.044381 |
| C    | 3.757441  | -2.496841 | 0.262913  |
| O    | 3.779419  | -3.302400 | 1.161315  |
| C    | 4.894442  | -2.163692 | -0.631006 |
| C    | 4.787368  | -1.179937 | -1.618893 |
| C    | 6.095433  | -2.851647 | -0.443819 |
| C    | 5.888281  | -0.888601 | -2.417860 |
| H    | 3.852912  | -0.646138 | -1.758316 |
| C    | 7.192115  | -2.555864 | -1.245635 |
| H    | 6.157296  | -3.609268 | 0.331088  |
| C    | 7.087902  | -1.574568 | -2.231554 |
| H    | 5.809843  | -0.125117 | -3.185304 |
| H    | 8.127671  | -3.086957 | -1.102026 |
| H    | 7.945627  | -1.341782 | -2.855434 |
| O    | 1.972860  | 0.199097  | 1.776438  |
| C    | 3.265053  | 0.563838  | 1.591079  |
| O    | 4.198684  | -0.155016 | 1.858979  |
| C    | 3.374989  | 1.932881  | 1.027161  |
| C    | 2.239480  | 2.686402  | 0.713118  |
| C    | 4.654667  | 2.444388  | 0.797126  |
| C    | 2.392281  | 3.959937  | 0.170749  |
| H    | 1.251550  | 2.269991  | 0.893813  |
| C    | 4.799636  | 3.716703  | 0.255527  |
| H    | 5.520224  | 1.837932  | 1.044429  |
| C    | 3.669313  | 4.472697  | -0.057737 |

---

|   |           |           |           |
|---|-----------|-----------|-----------|
| H | 1.513887  | 4.551661  | -0.075395 |
| H | 5.791406  | 4.119784  | 0.077028  |
| H | 3.784843  | 5.465462  | -0.482171 |
| C | 0.416881  | -0.127905 | 4.022725  |
| H | 1.400039  | -0.088954 | 4.504593  |
| H | 0.233843  | 0.832237  | 3.521229  |
| O | -0.525181 | -0.373551 | 5.028076  |
| C | -1.857718 | -0.014232 | 4.707989  |
| H | -2.361099 | -0.787403 | 4.116051  |
| H | -2.389456 | 0.105309  | 5.655032  |
| H | -1.888502 | 0.936491  | 4.158559  |
| H | -1.823186 | -1.125354 | 0.494204  |
| O | -0.851777 | 1.064068  | 0.845895  |
| P | -1.554860 | 1.871590  | -0.244695 |
| C | -0.979992 | 1.474291  | -1.911926 |
| C | -1.623950 | 0.465938  | -2.640032 |
| C | 0.175259  | 2.078063  | -2.427118 |
| C | -1.133172 | 0.087468  | -3.886682 |
| H | -2.506304 | -0.027752 | -2.239769 |
| C | 0.661415  | 1.693986  | -3.673885 |
| H | 0.689570  | 2.851976  | -1.862025 |
| C | 0.003095  | 0.705614  | -4.405661 |
| H | -1.637715 | -0.696164 | -4.443426 |
| H | 1.552296  | 2.166859  | -4.075161 |
| H | 0.384608  | 0.406507  | -5.377368 |
| C | -1.269370 | 3.635741  | 0.040162  |
| C | -0.935070 | 4.037292  | 1.337450  |
| C | -1.428477 | 4.589900  | -0.970965 |
| C | -0.747521 | 5.387921  | 1.619911  |
| H | -0.811260 | 3.289812  | 2.116265  |
| C | -1.237203 | 5.938863  | -0.683218 |
| H | -1.691869 | 4.284680  | -1.980391 |
| C | -0.895946 | 6.336850  | 0.609668  |
| H | -0.481163 | 5.697288  | 2.625671  |
| H | -1.354037 | 6.679451  | -1.468068 |
| H | -0.745817 | 7.389599  | 0.829158  |
| C | -3.336497 | 1.575046  | -0.194907 |
| C | -3.862998 | 0.940548  | 0.933030  |
| C | -4.182723 | 1.989307  | -1.229303 |
| C | -5.234225 | 0.712284  | 1.022068  |
| H | -3.198166 | 0.618383  | 1.730895  |
| C | -5.550110 | 1.755601  | -1.136231 |
| H | -3.773610 | 2.476308  | -2.111312 |
| C | -6.074427 | 1.117286  | -0.011826 |



---

|   |           |           |           |
|---|-----------|-----------|-----------|
| H | -5.643429 | 0.209126  | 1.892417  |
| H | -6.206580 | 2.065683  | -1.943002 |
| H | -7.141858 | 0.930222  | 0.053668  |
| C | -2.623473 | -5.196465 | 1.800431  |
| H | -3.303420 | -5.411607 | 2.630808  |
| H | -3.183626 | -5.295783 | 0.864499  |
| H | -1.817371 | -5.936512 | 1.805909  |
| C | -2.058549 | -3.793965 | 1.924998  |
| H | -2.870164 | -3.051957 | 1.923185  |
| H | -1.501551 | -3.681697 | 2.861306  |
| O | -1.131244 | -3.511137 | 0.880045  |
| H | -1.619443 | -3.550679 | 0.032709  |
| I | -3.931473 | -2.599435 | -1.232846 |

Intla

M06-2X SCF energy: -2538.34541018 a.u.  
M06-2X enthalpy: -2537.617479 a.u.  
M06-2X free energy: -2537.745499 a.u.  
M06-2X SCF energy in solution: -2538.96577038 a.u.  
M06-2X enthalpy in solution: -2538.237839 a.u.  
M06-2X free energy in solution: -2538.365859 a.u.  
Three lowest frequencies (cm-1): 12.3594 16.6326 21.9195

Cartesian coordinates

| ATOM | X         | Y         | Z         |
|------|-----------|-----------|-----------|
| C    | -1.937373 | 2.811947  | -1.994810 |
| C    | -0.786515 | 2.157111  | -2.761284 |
| C    | 0.307653  | 3.204901  | -2.899605 |
| C    | -0.295600 | 4.341557  | -0.919325 |
| C    | -1.457197 | 3.381481  | -0.661921 |
| H    | -0.391163 | 1.302002  | -2.199448 |
| H    | -2.358767 | 3.626061  | -2.594322 |
| H    | -0.664350 | 5.193495  | -1.510775 |
| H    | -2.274223 | 3.893262  | -0.148779 |
| O    | 0.723002  | 3.655517  | -1.648863 |
| N    | -1.204467 | 1.771916  | -4.115058 |
| N    | -1.874902 | 0.734569  | -4.161212 |
| N    | -2.483783 | -0.200770 | -4.322244 |
| O    | -2.920244 | 1.800779  | -1.808826 |
| C    | -4.192373 | 2.229797  | -1.624513 |
| O    | -4.479118 | 3.402737  | -1.569726 |
| C    | -5.159260 | 1.109891  | -1.506927 |

---

|   |           |           |           |
|---|-----------|-----------|-----------|
| C | -4.754621 | -0.227539 | -1.542000 |
| C | -6.509727 | 1.437363  | -1.359446 |
| C | -5.707724 | -1.234630 | -1.427031 |
| H | -3.704204 | -0.475803 | -1.652820 |
| C | -7.457087 | 0.427011  | -1.247624 |
| H | -6.801466 | 2.482518  | -1.335371 |
| C | -7.055473 | -0.908304 | -1.281077 |
| H | -5.399007 | -2.274919 | -1.451186 |
| H | -8.506945 | 0.678332  | -1.133986 |
| H | -7.796248 | -1.697401 | -1.191808 |
| O | -1.008950 | 2.268415  | 0.115754  |
| C | -1.278598 | 2.282278  | 1.438524  |
| O | -1.819598 | 3.211286  | 1.992392  |
| C | -0.830782 | 1.037651  | 2.117787  |
| C | -0.197411 | 0.000965  | 1.426082  |
| C | -1.070208 | 0.927188  | 3.489829  |
| C | 0.192233  | -1.144845 | 2.111949  |
| H | -0.013003 | 0.091666  | 0.360903  |
| C | -0.680478 | -0.220605 | 4.169880  |
| H | -1.564439 | 1.743520  | 4.006692  |
| C | -0.049813 | -1.256385 | 3.480693  |
| H | 0.683741  | -1.952833 | 1.579226  |
| H | -0.868996 | -0.309518 | 5.235109  |
| H | 0.252407  | -2.153759 | 4.012410  |
| C | 0.361182  | 4.855983  | 0.344436  |
| H | -0.399028 | 5.298462  | 1.003953  |
| H | 0.838138  | 4.017594  | 0.875724  |
| O | 1.323069  | 5.809421  | -0.036349 |
| C | 2.130630  | 6.213859  | 1.049244  |
| H | 2.680861  | 5.361746  | 1.471746  |
| H | 2.844309  | 6.946156  | 0.666288  |
| H | 1.528588  | 6.675485  | 1.843749  |
| H | -0.041005 | 4.038054  | -3.528741 |
| O | 1.436736  | 2.597228  | -3.504111 |
| P | 2.772998  | 3.468547  | -3.764385 |
| C | 2.342346  | 5.147367  | -4.210634 |
| C | 2.015975  | 6.060132  | -3.195557 |
| C | 2.271636  | 5.514622  | -5.560265 |
| C | 1.613151  | 7.343679  | -3.545737 |
| H | 2.058450  | 5.770886  | -2.147274 |
| C | 1.872278  | 6.805143  | -5.892765 |
| H | 2.529433  | 4.805287  | -6.341702 |
| C | 1.543330  | 7.714473  | -4.888960 |
| H | 1.355732  | 8.053543  | -2.765796 |

---

|   |          |          |           |
|---|----------|----------|-----------|
| H | 1.820976 | 7.099809 | -6.935763 |
| H | 1.233535 | 8.720477 | -5.155198 |
| C | 3.527004 | 2.598036 | -5.133044 |
| C | 4.902986 | 2.716880 | -5.358199 |
| C | 2.713758 | 1.863953 | -6.004732 |
| C | 5.465091 | 2.094589 | -6.467353 |
| H | 5.532282 | 3.285491 | -4.678099 |
| C | 3.291177 | 1.244053 | -7.108418 |
| H | 1.647703 | 1.773044 | -5.818198 |
| C | 4.660806 | 1.361006 | -7.338713 |
| H | 6.531496 | 2.179551 | -6.648881 |
| H | 2.669839 | 0.667910 | -7.786306 |
| H | 5.106247 | 0.875684 | -8.201675 |
| C | 3.781389 | 3.446861 | -2.284961 |
| C | 3.612334 | 2.411694 | -1.358710 |
| C | 4.746930 | 4.440534 | -2.086611 |
| C | 4.421246 | 2.375456 | -0.228282 |
| H | 2.846449 | 1.657292 | -1.512134 |
| C | 5.553727 | 4.388882 | -0.953961 |
| H | 4.865274 | 5.249384 | -2.802533 |
| C | 5.390012 | 3.359600 | -0.028877 |
| H | 4.292658 | 1.581755 | 0.500360  |
| H | 6.304182 | 5.155852 | -0.793821 |
| H | 6.017471 | 3.326360 | 0.856381  |

TS4a

M06-2X SCF energy: -2693.28461355 a.u.  
M06-2X enthalpy: -2692.470284 a.u.  
M06-2X free energy: -2692.608534 a.u.  
M06-2X SCF energy in solution: -2693.96364658 a.u.  
M06-2X enthalpy in solution: -2693.149317 a.u.  
M06-2X free energy in solution: -2693.287567 a.u.  
Three lowest frequencies (cm-1): -182.5182 12.0261 16.8953  
Imaginary frequency: -182.5182 cm-1

Cartesian coordinates

| ATOM | X         | Y         | Z         |
|------|-----------|-----------|-----------|
| C    | -2.181235 | -1.498114 | -0.414868 |
| C    | -1.111739 | -1.529998 | 0.669607  |
| C    | 0.247935  | -1.772643 | 0.078883  |
| C    | -0.446760 | -1.155708 | -2.151791 |
| C    | -1.716158 | -0.584911 | -1.542798 |

---

|   |           |           |           |
|---|-----------|-----------|-----------|
| H | -1.052158 | -0.538185 | 1.134532  |
| H | -2.365720 | -2.501667 | -0.806617 |
| H | -0.679011 | -2.103575 | -2.647469 |
| H | -2.474778 | -0.515465 | -2.326732 |
| O | 0.541260  | -1.525230 | -1.129215 |
| N | -1.362304 | -2.571388 | 1.671575  |
| N | -2.186763 | -2.226399 | 2.531032  |
| N | -2.922755 | -2.022992 | 3.358169  |
| O | -3.339832 | -0.994308 | 0.233070  |
| C | -4.529589 | -1.253651 | -0.366033 |
| O | -4.605984 | -1.825754 | -1.427167 |
| C | -5.678714 | -0.761372 | 0.432907  |
| C | -5.501477 | -0.100359 | 1.652034  |
| C | -6.962848 | -0.985266 | -0.070939 |
| C | -6.614266 | 0.332121  | 2.365497  |
| H | -4.502658 | 0.074959  | 2.037440  |
| C | -8.070574 | -0.551121 | 0.647176  |
| H | -7.078317 | -1.498527 | -1.020419 |
| C | -7.895865 | 0.106649  | 1.864741  |
| H | -6.481556 | 0.843930  | 3.313365  |
| H | -9.069360 | -0.723097 | 0.258666  |
| H | -8.762407 | 0.443903  | 2.425746  |
| O | -1.490527 | 0.697996  | -0.958495 |
| C | -1.825712 | 1.783396  | -1.700159 |
| O | -2.133862 | 1.703182  | -2.865526 |
| C | -1.767491 | 3.045184  | -0.919522 |
| C | -1.488269 | 3.059209  | 0.450857  |
| C | -2.009801 | 4.239424  | -1.604798 |
| C | -1.446289 | 4.272364  | 1.129687  |
| H | -1.296257 | 2.127880  | 0.975253  |
| C | -1.967698 | 5.448346  | -0.920197 |
| H | -2.230317 | 4.205757  | -2.667143 |
| C | -1.685619 | 5.463973  | 0.445861  |
| H | -1.226453 | 4.288717  | 2.192420  |
| H | -2.154729 | 6.377465  | -1.449148 |
| H | -1.651511 | 6.408852  | 0.979941  |
| C | 0.276924  | -0.226812 | -3.100646 |
| H | -0.403322 | 0.026899  | -3.926293 |
| H | 0.548833  | 0.702211  | -2.578221 |
| O | 1.424744  | -0.894526 | -3.556799 |
| C | 2.268074  | -0.029422 | -4.292882 |
| H | 2.583114  | 0.829079  | -3.682058 |
| H | 3.147481  | -0.606392 | -4.585973 |
| H | 1.762886  | 0.343452  | -5.194084 |

---

|   |           |           |           |
|---|-----------|-----------|-----------|
| H | 1.018659  | -2.257450 | 0.666029  |
| O | 1.141311  | 0.006135  | 1.024607  |
| P | 2.626441  | 0.281818  | 0.798356  |
| C | 3.579196  | -1.187883 | 0.327679  |
| C | 3.561594  | -1.625791 | -1.004893 |
| C | 4.270772  | -1.926948 | 1.295013  |
| C | 4.243837  | -2.785780 | -1.361249 |
| H | 3.010130  | -1.074158 | -1.763162 |
| C | 4.954679  | -3.084262 | 0.929811  |
| H | 4.285587  | -1.595111 | 2.329577  |
| C | 4.945083  | -3.510103 | -0.396995 |
| H | 4.231036  | -3.119962 | -2.394562 |
| H | 5.497231  | -3.648804 | 1.681645  |
| H | 5.483855  | -4.409534 | -0.680215 |
| C | 3.364124  | 0.939136  | 2.313887  |
| C | 4.715482  | 1.298360  | 2.376251  |
| C | 2.542276  | 1.094008  | 3.431710  |
| C | 5.239159  | 1.808384  | 3.559061  |
| H | 5.357848  | 1.177433  | 1.506829  |
| C | 3.072802  | 1.607087  | 4.614054  |
| H | 1.495103  | 0.812844  | 3.369259  |
| C | 4.417491  | 1.962555  | 4.676785  |
| H | 6.287352  | 2.085934  | 3.610257  |
| H | 2.435221  | 1.727049  | 5.484619  |
| H | 4.829534  | 2.361341  | 5.598814  |
| C | 2.861120  | 1.496890  | -0.521767 |
| C | 1.760127  | 2.288821  | -0.856655 |
| C | 4.090819  | 1.698104  | -1.159100 |
| C | 1.884724  | 3.285855  | -1.821785 |
| H | 0.808385  | 2.108095  | -0.365196 |
| C | 4.212719  | 2.698858  | -2.119377 |
| H | 4.947472  | 1.075590  | -0.911893 |
| C | 3.112190  | 3.492243  | -2.449008 |
| H | 1.024326  | 3.897317  | -2.080003 |
| H | 5.165769  | 2.856824  | -2.614652 |
| H | 3.214050  | 4.269842  | -3.200050 |
| C | 1.707425  | -5.087342 | -0.132968 |
| H | 2.126182  | -4.238141 | 0.418357  |
| H | 1.257954  | -5.781956 | 0.585496  |
| H | 2.531078  | -5.606015 | -0.633040 |
| C | 0.680998  | -4.631815 | -1.151423 |
| H | 1.119491  | -3.916353 | -1.855667 |
| H | 0.298778  | -5.481462 | -1.729422 |
| O | -0.416039 | -3.945215 | -0.540954 |

---

H        -0.757920    -4.479593    0.196946

$\alpha$ -17a

M06-2X SCF energy:        -2164.38664943 a.u.

M06-2X enthalpy:        -2163.825959 a.u.

M06-2X free energy:        -2163.940625 a.u.

M06-2X SCF energy in solution:        -2165.00886184 a.u.

M06-2X enthalpy in solution:        -2164.448171 a.u.

M06-2X free energy in solution:        -2164.562837 a.u.

Three lowest frequencies (cm-1):        10.6895        17.3015        22.3110

Cartesian coordinates

| ATOM | X         | Y         | Z         |
|------|-----------|-----------|-----------|
| C    | -2.086924 | 0.524470  | 0.283243  |
| C    | -0.737688 | 0.311359  | -0.382338 |
| C    | 0.053933  | 1.630407  | -0.397065 |
| C    | -1.074482 | 2.452735  | 1.522845  |
| C    | -1.905591 | 1.185555  | 1.648904  |
| H    | -0.155837 | -0.414802 | 0.198529  |
| H    | -2.724729 | 1.151798  | -0.346568 |
| H    | -1.645469 | 3.186724  | 0.940243  |
| H    | -2.879875 | 1.409876  | 2.089307  |
| O    | 0.167975  | 2.178365  | 0.865405  |
| N    | -0.995087 | -0.182642 | -1.743503 |
| N    | -0.017477 | -0.701374 | -2.288521 |
| N    | 0.811215  | -1.190221 | -2.877716 |
| O    | -2.676404 | -0.762384 | 0.447385  |
| C    | -4.013713 | -0.786255 | 0.641349  |
| O    | -4.706843 | 0.200452  | 0.557609  |
| C    | -4.515785 | -2.150691 | 0.953116  |
| C    | -5.898007 | -2.331794 | 1.036267  |
| C    | -3.648187 | -3.221026 | 1.185824  |
| C    | -6.414156 | -3.585182 | 1.344569  |
| H    | -6.553888 | -1.485384 | 0.858018  |
| C    | -4.169584 | -4.472225 | 1.499084  |
| H    | -2.575142 | -3.071940 | 1.126175  |
| C    | -5.549890 | -4.654877 | 1.576537  |
| H    | -7.488370 | -3.728689 | 1.406872  |
| H    | -3.498485 | -5.305054 | 1.684890  |
| H    | -5.953156 | -5.633359 | 1.820667  |
| O    | -1.187609 | 0.278345  | 2.493690  |
| C    | -1.909402 | -0.549342 | 3.277152  |

---

|   |           |           |           |
|---|-----------|-----------|-----------|
| O | -3.115689 | -0.507992 | 3.359071  |
| C | -1.047494 | -1.505995 | 4.022061  |
| C | -1.679980 | -2.473675 | 4.806835  |
| C | 0.347437  | -1.461794 | 3.942187  |
| C | -0.917512 | -3.397174 | 5.512520  |
| H | -2.764554 | -2.492984 | 4.850375  |
| C | 1.105335  | -2.386480 | 4.653520  |
| H | 0.831635  | -0.708073 | 3.329922  |
| C | 0.474537  | -3.352672 | 5.436385  |
| H | -1.406579 | -4.152073 | 6.120258  |
| H | 2.188883  | -2.354174 | 4.596349  |
| H | 1.069499  | -4.074300 | 5.988463  |
| C | -0.738716 | 3.049593  | 2.872859  |
| H | -1.650870 | 3.076501  | 3.491260  |
| H | 0.000174  | 2.412649  | 3.381727  |
| O | -0.233504 | 4.343669  | 2.669176  |
| C | 0.128989  | 4.956990  | 3.885016  |
| H | 0.927886  | 4.398636  | 4.393708  |
| H | 0.489168  | 5.960881  | 3.650309  |
| H | -0.730906 | 5.034088  | 4.566169  |
| O | -0.631794 | 2.578453  | -1.233301 |
| C | -0.206603 | 2.756438  | -2.489242 |
| N | 0.670612  | 2.043523  | -3.042703 |
| C | 1.170393  | 2.294984  | -4.342221 |
| C | 1.914083  | 3.443681  | -4.625371 |
| C | 0.979909  | 1.323600  | -5.329026 |
| C | 2.447390  | 3.622790  | -5.899594 |
| H | 2.078246  | 4.181340  | -3.845922 |
| C | 1.505975  | 1.519021  | -6.601421 |
| H | 0.410419  | 0.430244  | -5.090747 |
| C | 2.243084  | 2.666831  | -6.891902 |
| H | 3.025626  | 4.516497  | -6.114735 |
| H | 1.345192  | 0.766200  | -7.367294 |
| H | 2.660654  | 2.811044  | -7.883441 |
| C | -0.939531 | 3.956477  | -3.105056 |
| F | -2.083510 | 4.202895  | -2.469876 |
| F | -0.179760 | 5.055563  | -3.023954 |
| F | -1.218928 | 3.740484  | -4.389944 |
| H | 1.064262  | 1.479370  | -0.782590 |

$\beta$ -17a

M06-2X SCF energy: -2164.38495255 a.u.

---

M06-2X enthalpy: -2163.824066 a.u.  
M06-2X free energy: -2163.937625 a.u.  
M06-2X SCF energy in solution: -2165.00726381 a.u.  
M06-2X enthalpy in solution: -2164.446377 a.u.  
M06-2X free energy in solution: -2164.559936 a.u.  
Three lowest frequencies (cm-1): 17.6563 18.0239 24.0054

Cartesian coordinates

| ATOM | X         | Y         | Z         |
|------|-----------|-----------|-----------|
| C    | -1.099820 | -0.008751 | -0.379602 |
| C    | 0.390366  | -0.267997 | -0.536721 |
| C    | 1.112791  | 1.077154  | -0.626788 |
| C    | -0.479184 | 2.218820  | 0.630611  |
| C    | -1.366131 | 0.983896  | 0.758493  |
| H    | 0.771162  | -0.804355 | 0.341713  |
| H    | -1.510529 | 0.389016  | -1.313029 |
| H    | -0.780949 | 2.771184  | -0.272083 |
| H    | -2.421019 | 1.267839  | 0.762674  |
| H    | 0.818865  | 1.627591  | -1.531785 |
| O    | 0.887443  | 1.832009  | 0.521755  |
| N    | 0.588185  | -1.046521 | -1.770284 |
| N    | 1.712742  | -1.547975 | -1.873049 |
| N    | 2.707425  | -2.045247 | -2.062741 |
| O    | -1.705566 | -1.259482 | -0.071380 |
| C    | -3.018399 | -1.397924 | -0.364283 |
| O    | -3.640687 | -0.586122 | -1.006784 |
| C    | -3.577821 | -2.659599 | 0.189362  |
| C    | -4.846430 | -3.060995 | -0.233859 |
| C    | -2.880448 | -3.410443 | 1.139521  |
| C    | -5.413173 | -4.219850 | 0.285741  |
| H    | -5.375446 | -2.459795 | -0.966921 |
| C    | -3.456785 | -4.561745 | 1.665808  |
| H    | -1.897484 | -3.089852 | 1.468583  |
| C    | -4.720029 | -4.968106 | 1.236973  |
| H    | -6.396256 | -4.538238 | -0.046775 |
| H    | -2.920862 | -5.138572 | 2.413431  |
| H    | -5.166322 | -5.869152 | 1.647386  |
| O    | -1.034575 | 0.340423  | 1.994319  |
| C    | -2.028528 | -0.305369 | 2.638597  |
| O    | -3.184992 | -0.273127 | 2.283708  |
| C    | -1.536495 | -1.057852 | 3.823289  |
| C    | -2.456612 | -1.857964 | 4.506433  |
| C    | -0.203666 | -0.998584 | 4.240023  |
| C    | -2.043993 | -2.598662 | 5.607868  |



---

|   |           |           |           |
|---|-----------|-----------|-----------|
| H | -3.484993 | -1.893277 | 4.160308  |
| C | 0.201897  | -1.737786 | 5.347071  |
| H | 0.506273  | -0.379343 | 3.701539  |
| C | -0.715517 | -2.536410 | 6.028866  |
| H | -2.755895 | -3.223293 | 6.138421  |
| H | 1.235199  | -1.693062 | 5.676544  |
| H | -0.394865 | -3.114355 | 6.890545  |
| C | -0.596811 | 3.131278  | 1.833290  |
| H | -1.662000 | 3.290265  | 2.067333  |
| H | -0.124767 | 2.648650  | 2.701763  |
| O | 0.037319  | 4.346187  | 1.527410  |
| C | 0.034600  | 5.224487  | 2.629615  |
| H | 0.564099  | 4.789947  | 3.489499  |
| H | 0.546196  | 6.138318  | 2.319787  |
| H | -0.990201 | 5.474938  | 2.939946  |
| O | 2.486317  | 0.763783  | -0.685191 |
| C | 3.322438  | 1.702580  | -1.167151 |
| N | 2.961328  | 2.872412  | -1.444497 |
| C | 3.819095  | 3.835861  | -2.024964 |
| C | 4.397324  | 3.640759  | -3.282289 |
| C | 4.009290  | 5.041327  | -1.345083 |
| C | 5.188272  | 4.642296  | -3.838971 |
| H | 4.215574  | 2.714715  | -3.819004 |
| C | 4.814682  | 6.028167  | -1.903174 |
| H | 3.528510  | 5.184461  | -0.382009 |
| C | 5.407326  | 5.833263  | -3.150847 |
| H | 5.635809  | 4.486898  | -4.816176 |
| H | 4.973434  | 6.957668  | -1.364487 |
| H | 6.028523  | 6.609185  | -3.587361 |
| C | 4.713901  | 1.076526  | -1.331936 |
| F | 4.871572  | 0.032143  | -0.521145 |
| F | 4.878969  | 0.645000  | -2.589180 |
| F | 5.674827  | 1.958332  | -1.064330 |

TMSI

M06-2X SCF energy: -420.53229462 a.u.  
M06-2X enthalpy: -420.409327 a.u.  
M06-2X free energy: -420.453528 a.u.  
M06-2X SCF energy in solution: -420.63615597 a.u.  
M06-2X enthalpy in solution: -420.513188 a.u.  
M06-2X free energy in solution: -420.557389 a.u.  
Three lowest frequencies (cm-1): 145.5882 149.9084 165.7522

---

Cartesian coordinates

| ATOM | X         | Y         | Z         |
|------|-----------|-----------|-----------|
| Si   | -0.932808 | -0.039735 | 0.102939  |
| C    | -2.795209 | 0.019453  | -0.002946 |
| H    | -3.159764 | 1.050696  | -0.033343 |
| H    | -3.156036 | -0.502579 | -0.894522 |
| H    | -3.227659 | -0.470698 | 0.878189  |
| C    | -0.253961 | 0.915742  | 1.554602  |
| H    | -0.596567 | 0.451931  | 2.488063  |
| H    | 0.840487  | 0.914024  | 1.555846  |
| H    | -0.599146 | 1.954059  | 1.544733  |
| C    | -0.254203 | -1.775517 | -0.005172 |
| H    | -0.614071 | -2.289546 | -0.901845 |
| H    | 0.839963  | -1.773199 | -0.021109 |
| H    | -0.580844 | -2.348790 | 0.871484  |
| I    | -0.092942 | 1.164739  | -1.968495 |

TMSI-OPTFAI

M06-2X SCF energy: -1146.30405616 a.u.  
M06-2X enthalpy: -1146.049018 a.u.  
M06-2X free energy: -1146.118024 a.u.  
M06-2X SCF energy in solution: -1146.59343671 a.u.  
M06-2X enthalpy in solution: -1146.338399 a.u.  
M06-2X free energy in solution: -1146.407405 a.u.  
Three lowest frequencies (cm-1): 22.7427 27.0617 41.6264

Cartesian coordinates

| ATOM | X         | Y         | Z         |
|------|-----------|-----------|-----------|
| Si   | -0.846030 | -0.054571 | 0.189638  |
| C    | -2.655414 | 0.081996  | -0.234266 |
| H    | -2.964651 | 1.128631  | -0.327891 |
| H    | -2.880162 | -0.423538 | -1.179531 |
| H    | -3.269655 | -0.380101 | 0.546842  |
| C    | -0.416793 | 0.947586  | 1.705775  |
| H    | -1.052529 | 0.645765  | 2.546492  |
| H    | 0.627151  | 0.811770  | 2.001676  |
| H    | -0.588984 | 2.014906  | 1.527481  |
| C    | -0.290633 | -1.833191 | 0.283804  |
| H    | -0.381232 | -2.322473 | -0.692517 |
| H    | 0.746794  | -1.920781 | 0.617846  |
| H    | -0.924401 | -2.384029 | 0.988766  |

---

|   |           |           |           |
|---|-----------|-----------|-----------|
| O | -0.110453 | 0.685423  | -1.195926 |
| C | 1.201727  | 0.788500  | -1.343012 |
| N | 2.031858  | 0.394350  | -0.474904 |
| C | 3.432058  | 0.423798  | -0.656935 |
| C | 4.206115  | 1.163957  | 0.241326  |
| C | 4.056005  | -0.342350 | -1.646284 |
| C | 5.591758  | 1.168957  | 0.122266  |
| H | 3.708122  | 1.734431  | 1.019842  |
| C | 5.444705  | -0.340745 | -1.749168 |
| H | 3.450380  | -0.940104 | -2.320913 |
| C | 6.217367  | 0.417219  | -0.872036 |
| H | 6.185971  | 1.757973  | 0.814786  |
| H | 5.922793  | -0.936773 | -2.521076 |
| H | 7.299557  | 0.416878  | -0.957397 |
| C | 1.543932  | 1.425026  | -2.698950 |
| F | 0.544511  | 2.187238  | -3.140773 |
| F | 2.634715  | 2.189249  | -2.623693 |
| F | 1.767216  | 0.474504  | -3.617769 |

TS5

M06-2X SCF energy: -2549.80693715 a.u.  
M06-2X enthalpy: -2549.078981 a.u.  
M06-2X free energy: -2549.215062 a.u.  
M06-2X SCF energy in solution: -2550.49414658 a.u.  
M06-2X enthalpy in solution: -2549.766190 a.u.  
M06-2X free energy in solution: -2549.902271 a.u.  
Three lowest frequencies (cm-1): -125.6201 7.3216 15.6513  
Imaginary frequency: -125.6201 cm-1

Cartesian coordinates

| ATOM | X         | Y         | Z         |
|------|-----------|-----------|-----------|
| C    | 0.932672  | 1.012293  | -0.418117 |
| C    | 0.541805  | 0.084700  | 0.721936  |
| C    | -0.340726 | -1.048068 | 0.224743  |
| C    | 0.295477  | -0.748249 | -2.075894 |
| C    | 1.402861  | 0.160262  | -1.595094 |
| H    | 1.463085  | -0.356471 | 1.114901  |
| H    | 0.093636  | 1.644333  | -0.712587 |
| H    | -0.498733 | -0.136266 | -2.515500 |
| H    | 1.714194  | 0.799911  | -2.424907 |
| H    | -1.142811 | -1.415211 | 0.856453  |
| O    | -0.383481 | -1.444672 | -0.983059 |

---

|   |           |           |           |
|---|-----------|-----------|-----------|
| N | -0.170054 | 0.837702  | 1.754750  |
| N | -0.035071 | 0.386641  | 2.901165  |
| N | 0.009857  | 0.080951  | 3.984589  |
| O | 2.015462  | 1.792158  | 0.074184  |
| C | 2.317913  | 2.899769  | -0.640701 |
| O | 1.644868  | 3.279755  | -1.570232 |
| C | 3.540904  | 3.579197  | -0.141559 |
| C | 4.395523  | 2.976017  | 0.785436  |
| C | 3.832403  | 4.845717  | -0.652562 |
| C | 5.540707  | 3.648776  | 1.200312  |
| H | 4.168372  | 1.987669  | 1.171150  |
| C | 4.973411  | 5.516916  | -0.228280 |
| H | 3.157575  | 5.289927  | -1.377221 |
| C | 5.827496  | 4.917532  | 0.697403  |
| H | 6.210843  | 3.183192  | 1.916080  |
| H | 5.198941  | 6.503983  | -0.619399 |
| H | 6.720915  | 5.440182  | 1.025890  |
| O | 2.496382  | -0.651444 | -1.163093 |
| C | 3.743073  | -0.150350 | -1.351259 |
| O | 3.952217  | 0.888900  | -1.931937 |
| C | 4.791971  | -1.020623 | -0.764615 |
| C | 4.489500  | -2.261329 | -0.197493 |
| C | 6.108203  | -0.549925 | -0.782929 |
| C | 5.510950  | -3.031620 | 0.348855  |
| H | 3.464575  | -2.616970 | -0.178142 |
| C | 7.123641  | -1.323580 | -0.233856 |
| H | 6.316651  | 0.420241  | -1.223192 |
| C | 6.824541  | -2.564015 | 0.331123  |
| H | 5.278916  | -3.994410 | 0.793373  |
| H | 8.146675  | -0.961479 | -0.243310 |
| H | 7.618545  | -3.166960 | 0.761670  |
| C | 0.739721  | -1.815389 | -3.049070 |
| H | 1.366371  | -1.345645 | -3.823972 |
| H | 1.346771  | -2.569228 | -2.527052 |
| O | -0.419925 | -2.382360 | -3.598131 |
| C | -0.127381 | -3.491230 | -4.421163 |
| H | 0.373435  | -4.286759 | -3.852960 |
| H | -1.076666 | -3.868491 | -4.805947 |
| H | 0.513754  | -3.203304 | -5.265996 |
| I | 0.919078  | -3.245087 | 1.648923  |
| P | -3.406963 | 0.644099  | -0.139257 |
| O | -1.995382 | 0.735061  | -0.677725 |
| C | -3.487641 | 0.180583  | 1.611114  |
| C | -3.281786 | 1.157293  | 2.594460  |

---

|   |           |           |           |
|---|-----------|-----------|-----------|
| C | -3.590309 | -1.164859 | 1.979870  |
| C | -3.191743 | 0.789129  | 3.933062  |
| H | -3.187640 | 2.203112  | 2.312909  |
| C | -3.486962 | -1.530828 | 3.321262  |
| H | -3.743470 | -1.929922 | 1.222689  |
| C | -3.293642 | -0.554825 | 4.295580  |
| H | -3.035929 | 1.548324  | 4.693240  |
| H | -3.559434 | -2.576775 | 3.601945  |
| H | -3.213898 | -0.840642 | 5.340091  |
| C | -4.277917 | 2.224229  | -0.308328 |
| C | -3.766720 | 3.139997  | -1.232676 |
| C | -5.437234 | 2.531969  | 0.412840  |
| C | -4.416986 | 4.353765  | -1.441994 |
| H | -2.857640 | 2.899818  | -1.776701 |
| C | -6.084208 | 3.745862  | 0.199334  |
| H | -5.828947 | 1.832971  | 1.147551  |
| C | -5.575574 | 4.654664  | -0.728774 |
| H | -4.016825 | 5.064668  | -2.158101 |
| H | -6.981078 | 3.985730  | 0.761782  |
| H | -6.080966 | 5.601943  | -0.891017 |
| C | -4.355505 | -0.609624 | -1.045440 |
| C | -5.713499 | -0.836291 | -0.793394 |
| C | -3.689799 | -1.360635 | -2.016532 |
| C | -6.399750 | -1.806977 | -1.515361 |
| H | -6.234378 | -0.258902 | -0.033340 |
| C | -4.381456 | -2.333476 | -2.736721 |
| H | -2.634033 | -1.188336 | -2.205092 |
| C | -5.733292 | -2.554598 | -2.487737 |
| H | -7.452897 | -1.982838 | -1.319600 |
| H | -3.861397 | -2.915907 | -3.491067 |
| H | -6.271300 | -3.312644 | -3.048966 |

Int2

M06-2X SCF energy: -2549.84288322 a.u.  
M06-2X enthalpy: -2549.111928 a.u.  
M06-2X free energy: -2549.248412 a.u.  
M06-2X SCF energy in solution: -2550.52717205 a.u.  
M06-2X enthalpy in solution: -2549.796217 a.u.  
M06-2X free energy in solution: -2549.932701 a.u.  
Three lowest frequencies (cm-1): 8.7588 12.5035 19.2369

Cartesian coordinates

---

| ATOM | X         | Y         | Z         |
|------|-----------|-----------|-----------|
| C    | -1.622621 | 2.843338  | -2.066320 |
| C    | -0.186033 | 2.406020  | -2.314071 |
| C    | 0.719228  | 3.643496  | -2.373411 |
| C    | -0.715423 | 4.923037  | -1.002533 |
| C    | -1.699229 | 3.773913  | -0.851103 |
| H    | 0.155492  | 1.783963  | -1.478382 |
| H    | -2.018079 | 3.359709  | -2.946071 |
| H    | -1.033239 | 5.536584  | -1.855522 |
| H    | -2.716825 | 4.155107  | -0.737030 |
| O    | 0.604561  | 4.420959  | -1.240472 |
| N    | -0.127494 | 1.679121  | -3.590552 |
| N    | 0.722372  | 0.784589  | -3.631401 |
| N    | 1.464786  | -0.053296 | -3.772607 |
| O    | -2.380776 | 1.665801  | -1.811694 |
| C    | -3.716959 | 1.767719  | -1.999324 |
| O    | -4.235070 | 2.734734  | -2.506247 |
| C    | -4.448721 | 0.565194  | -1.524949 |
| C    | -3.844536 | -0.385871 | -0.698328 |
| C    | -5.788299 | 0.430140  | -1.895442 |
| C    | -4.586138 | -1.472872 | -0.246547 |
| H    | -2.806757 | -0.267935 | -0.403773 |
| C    | -6.522024 | -0.663609 | -1.450397 |
| H    | -6.240129 | 1.185999  | -2.530079 |
| C    | -5.921159 | -1.613779 | -0.624876 |
| H    | -4.123614 | -2.209265 | 0.403274  |
| H    | -7.561660 | -0.773641 | -1.742268 |
| H    | -6.495999 | -2.465579 | -0.273740 |
| O    | -1.326846 | 3.026173  | 0.311333  |
| C    | -2.319171 | 2.441146  | 1.015780  |
| O    | -3.493105 | 2.605478  | 0.774920  |
| C    | -1.798525 | 1.583108  | 2.112679  |
| C    | -0.430796 | 1.468324  | 2.377709  |
| C    | -2.728910 | 0.871941  | 2.875779  |
| C    | 0.001095  | 0.644034  | 3.412004  |
| H    | 0.285288  | 2.022745  | 1.780320  |
| C    | -2.291019 | 0.047209  | 3.905633  |
| H    | -3.785964 | 0.973067  | 2.650307  |
| C    | -0.926770 | -0.065341 | 4.174050  |
| H    | 1.061831  | 0.554178  | 3.623984  |
| H    | -3.011170 | -0.507224 | 4.498974  |
| H    | -0.585751 | -0.708689 | 4.979597  |
| C    | -0.623498 | 5.812323  | 0.216943  |
| H    | -1.637988 | 6.085473  | 0.547477  |

---

|   |           |          |           |
|---|-----------|----------|-----------|
| H | -0.125531 | 5.273491 | 1.035748  |
| O | 0.108552  | 6.953930 | -0.156211 |
| C | 0.291246  | 7.842270 | 0.923585  |
| H | 0.868186  | 7.373602 | 1.733062  |
| H | 0.839005  | 8.708250 | 0.546304  |
| H | -0.672815 | 8.179625 | 1.329606  |
| O | 0.299129  | 4.407494 | -3.519500 |
| P | 1.275485  | 4.979160 | -4.667065 |
| C | 0.181299  | 6.092725 | -5.532167 |
| C | -1.119175 | 5.663472 | -5.833359 |
| C | 0.624536  | 7.364084 | -5.904559 |
| C | -1.974424 | 6.519987 | -6.515159 |
| H | -1.455137 | 4.672300 | -5.539867 |
| C | -0.242974 | 8.211667 | -6.588247 |
| H | 1.633757  | 7.687909 | -5.669604 |
| C | -1.534792 | 7.790267 | -6.891898 |
| H | -2.982827 | 6.198025 | -6.753499 |
| H | 0.095498  | 9.198437 | -6.885763 |
| H | -2.206555 | 8.454739 | -7.426743 |
| C | 1.841015  | 3.639337 | -5.708973 |
| C | 2.778828  | 2.722366 | -5.210584 |
| C | 1.317530  | 3.487903 | -6.997573 |
| C | 3.173103  | 1.647680 | -5.998458 |
| H | 3.207918  | 2.850451 | -4.219920 |
| C | 1.722825  | 2.410127 | -7.778683 |
| H | 0.615363  | 4.211826 | -7.398193 |
| C | 2.642799  | 1.491591 | -7.279513 |
| H | 3.894851  | 0.935212 | -5.613043 |
| H | 1.323844  | 2.296399 | -8.780976 |
| H | 2.955703  | 0.652784 | -7.893406 |
| C | 2.631958  | 5.819993 | -3.864011 |
| C | 2.348422  | 6.556888 | -2.703725 |
| C | 3.926892  | 5.780548 | -4.394375 |
| C | 3.376973  | 7.242370 | -2.068691 |
| H | 1.345839  | 6.588103 | -2.285509 |
| C | 4.943337  | 6.482037 | -3.752134 |
| H | 4.138345  | 5.223766 | -5.302405 |
| C | 4.669548  | 7.204955 | -2.592538 |
| H | 3.165779  | 7.803737 | -1.164117 |
| H | 5.948214  | 6.461134 | -4.160485 |
| H | 5.469111  | 7.743799 | -2.093486 |
| H | 1.771795  | 3.357243 | -2.456330 |
| I | 3.541615  | 6.431745 | -8.297469 |

---

TS6  
M06-2X SCF energy: -2704.78552799 a.u.  
M06-2X enthalpy: -2703.967556 a.u.  
M06-2X free energy: -2704.111036 a.u.  
M06-2X SCF energy in solution: -2705.52827226 a.u.  
M06-2X enthalpy in solution: -2704.710300 a.u.  
M06-2X free energy in solution: -2704.853780 a.u.  
Three lowest frequencies (cm-1): -180.9363 15.6515 21.3606  
Imaginary frequency: -180.9363 cm-1

Cartesian coordinates

| ATOM | X         | Y         | Z         |
|------|-----------|-----------|-----------|
| C    | -1.472728 | 1.339200  | 0.042927  |
| C    | -0.945842 | 0.472191  | -1.092241 |
| C    | 0.152252  | -0.441802 | -0.620516 |
| C    | -0.486200 | -0.248410 | 1.690242  |
| C    | -1.770407 | 0.427860  | 1.227970  |
| H    | -1.770269 | -0.187187 | -1.391797 |
| H    | -0.747358 | 2.104583  | 0.322309  |
| H    | 0.187704  | 0.521237  | 2.082591  |
| H    | -2.173573 | 1.001702  | 2.066102  |
| O    | 0.262669  | -0.840842 | 0.577717  |
| N    | -0.450472 | 1.239444  | -2.236241 |
| N    | -1.348911 | 1.562575  | -3.023776 |
| N    | -2.080110 | 1.913271  | -3.806575 |
| O    | -2.658593 | 1.930390  | -0.474700 |
| C    | -3.120589 | 3.023351  | 0.174131  |
| O    | -2.595899 | 3.456870  | 1.173148  |
| C    | -4.321447 | 3.601554  | -0.480325 |
| C    | -4.864516 | 3.054895  | -1.646715 |
| C    | -4.902821 | 4.726694  | 0.109921  |
| C    | -5.990630 | 3.638392  | -2.218118 |
| H    | -4.410990 | 2.181182  | -2.102386 |
| C    | -6.027712 | 5.305533  | -0.465706 |
| H    | -4.465556 | 5.134748  | 1.015557  |
| C    | -6.571250 | 4.761028  | -1.629301 |
| H    | -6.414910 | 3.217249  | -3.123895 |
| H    | -6.481494 | 6.179142  | -0.008771 |
| H    | -7.450317 | 5.213151  | -2.078645 |
| O    | -2.724193 | -0.528816 | 0.776951  |
| C    | -3.547160 | -1.046666 | 1.717160  |
| O    | -3.641959 | -0.587664 | 2.832270  |



---

|   |           |           |           |
|---|-----------|-----------|-----------|
| C | -4.329838 | -2.201594 | 1.213183  |
| C | -3.917891 | -2.940323 | 0.100197  |
| C | -5.473769 | -2.565167 | 1.926803  |
| C | -4.670656 | -4.041467 | -0.299716 |
| H | -3.003806 | -2.669368 | -0.421823 |
| C | -6.226709 | -3.658281 | 1.514213  |
| H | -5.760986 | -1.983910 | 2.797216  |
| C | -5.824483 | -4.395500 | 0.400522  |
| H | -4.355222 | -4.628983 | -1.156439 |
| H | -7.121100 | -3.938221 | 2.061632  |
| H | -6.408245 | -5.253919 | 0.081862  |
| C | -0.638471 | -1.347574 | 2.721084  |
| H | 0.361418  | -1.665072 | 3.051086  |
| H | -1.170074 | -0.923532 | 3.585979  |
| O | -1.339761 | -2.424861 | 2.157158  |
| C | -1.693886 | -3.385279 | 3.130058  |
| H | -2.391327 | -2.958730 | 3.864947  |
| H | -2.179715 | -4.211509 | 2.607571  |
| H | -0.805893 | -3.762144 | 3.655656  |
| H | 0.974077  | -0.714906 | -1.279049 |
| C | -0.967391 | -3.574417 | -3.510863 |
| H | -0.248781 | -4.322913 | -3.161245 |
| H | -1.974369 | -3.889704 | -3.220807 |
| H | -0.914870 | -3.530928 | -4.603056 |
| C | -0.646035 | -2.215907 | -2.921136 |
| H | 0.363317  | -1.891402 | -3.210306 |
| H | -1.362873 | -1.464811 | -3.268727 |
| O | -0.755938 | -2.233934 | -1.491401 |
| H | -0.092992 | -2.881688 | -1.162247 |
| O | 1.412938  | 1.575930  | -0.067312 |
| P | 2.872811  | 1.424194  | 0.319919  |
| C | 3.114430  | 0.537866  | 1.881034  |
| C | 3.145689  | -0.861954 | 1.888323  |
| C | 3.122664  | 1.240632  | 3.092462  |
| C | 3.204879  | -1.549977 | 3.097813  |
| H | 3.122195  | -1.420956 | 0.955181  |
| C | 3.172705  | 0.547340  | 4.299150  |
| H | 3.092758  | 2.327129  | 3.094932  |
| C | 3.218400  | -0.846540 | 4.301758  |
| H | 3.236417  | -2.635533 | 3.094086  |
| H | 3.182167  | 1.095471  | 5.236070  |
| H | 3.264847  | -1.384718 | 5.243866  |
| C | 3.647584  | 3.049194  | 0.525265  |
| C | 4.973204  | 3.176362  | 0.955666  |

---

|   |          |           |           |
|---|----------|-----------|-----------|
| C | 2.895134 | 4.185234  | 0.222354  |
| C | 5.540448 | 4.439993  | 1.081188  |
| H | 5.557781 | 2.291731  | 1.198500  |
| C | 3.468192 | 5.449720  | 0.350278  |
| H | 1.867301 | 4.072322  | -0.110436 |
| C | 4.787667 | 5.575871  | 0.777767  |
| H | 6.567909 | 4.540461  | 1.416785  |
| H | 2.883962 | 6.333998  | 0.115467  |
| H | 5.233177 | 6.561008  | 0.877843  |
| C | 3.785919 | 0.528878  | -0.961128 |
| C | 3.223463 | 0.500433  | -2.241635 |
| C | 5.014439 | -0.094735 | -0.720541 |
| C | 3.884381 | -0.158727 | -3.275093 |
| H | 2.265506 | 0.984862  | -2.419033 |
| C | 5.670974 | -0.750231 | -1.758154 |
| H | 5.449851 | -0.087254 | 0.275498  |
| C | 5.105843 | -0.783326 | -3.032320 |
| H | 3.442610 | -0.190574 | -4.266327 |
| H | 6.618221 | -1.245506 | -1.569615 |
| H | 5.616366 | -1.304584 | -3.836226 |
| I | 2.500005 | -3.520840 | -1.149452 |

# Spectroscopic Data

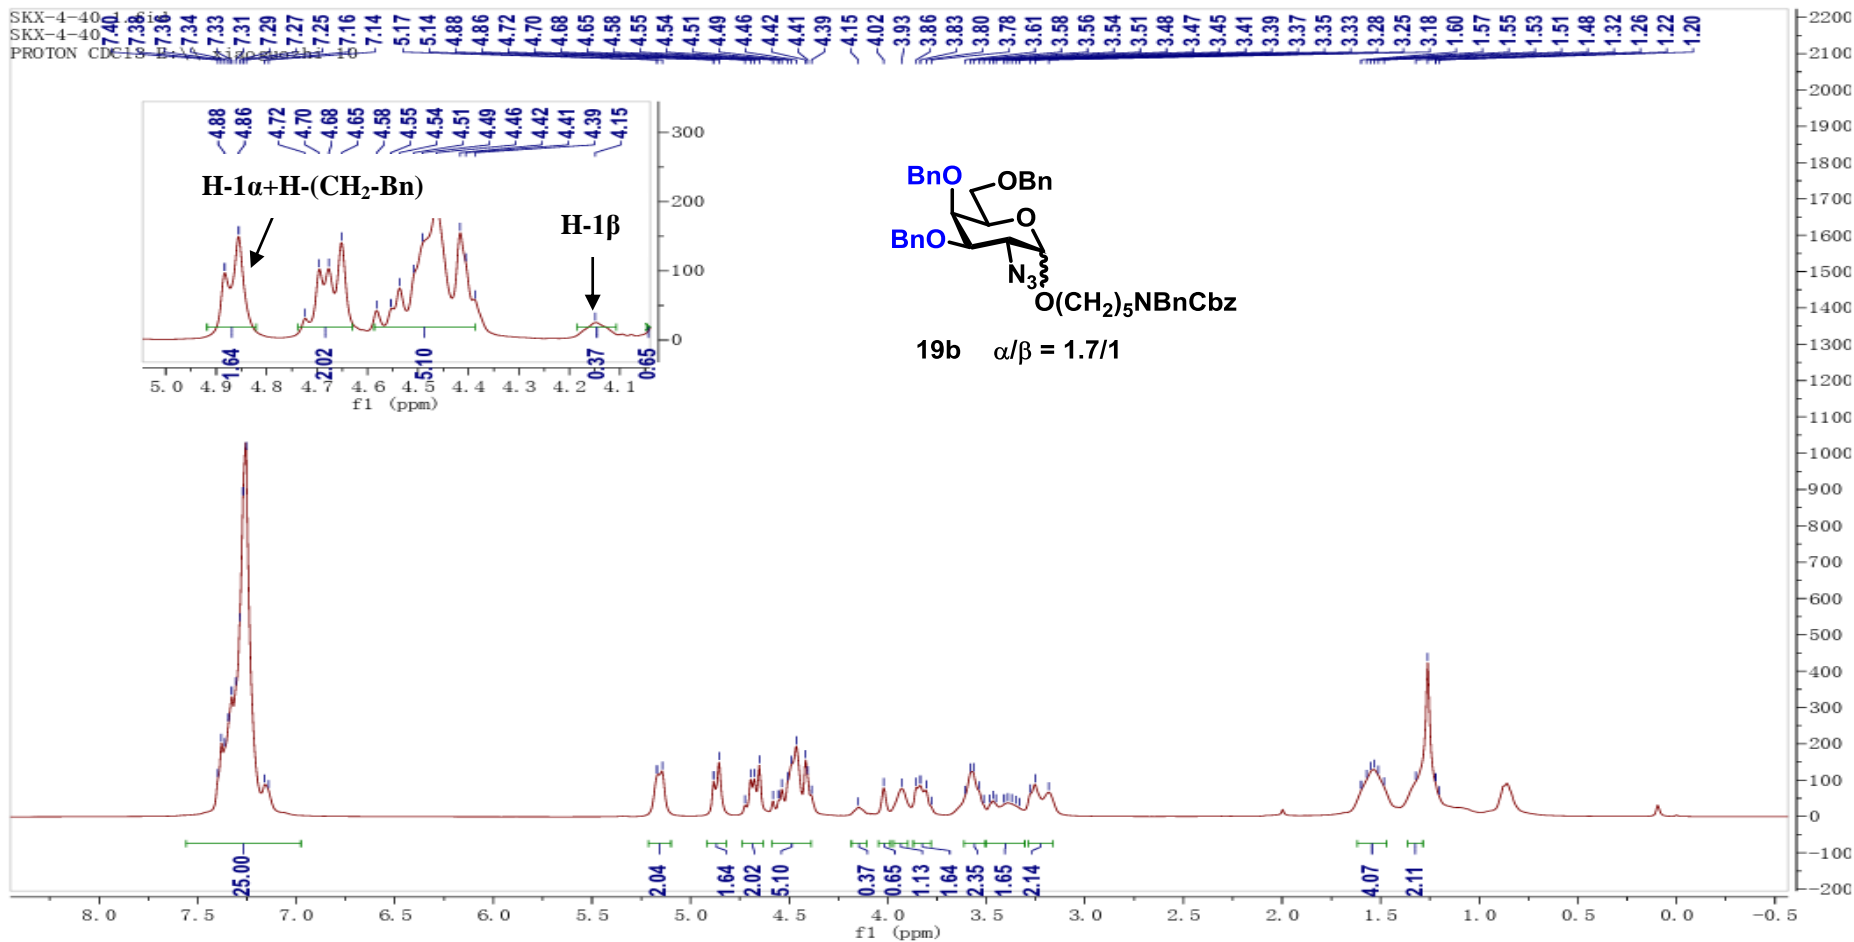

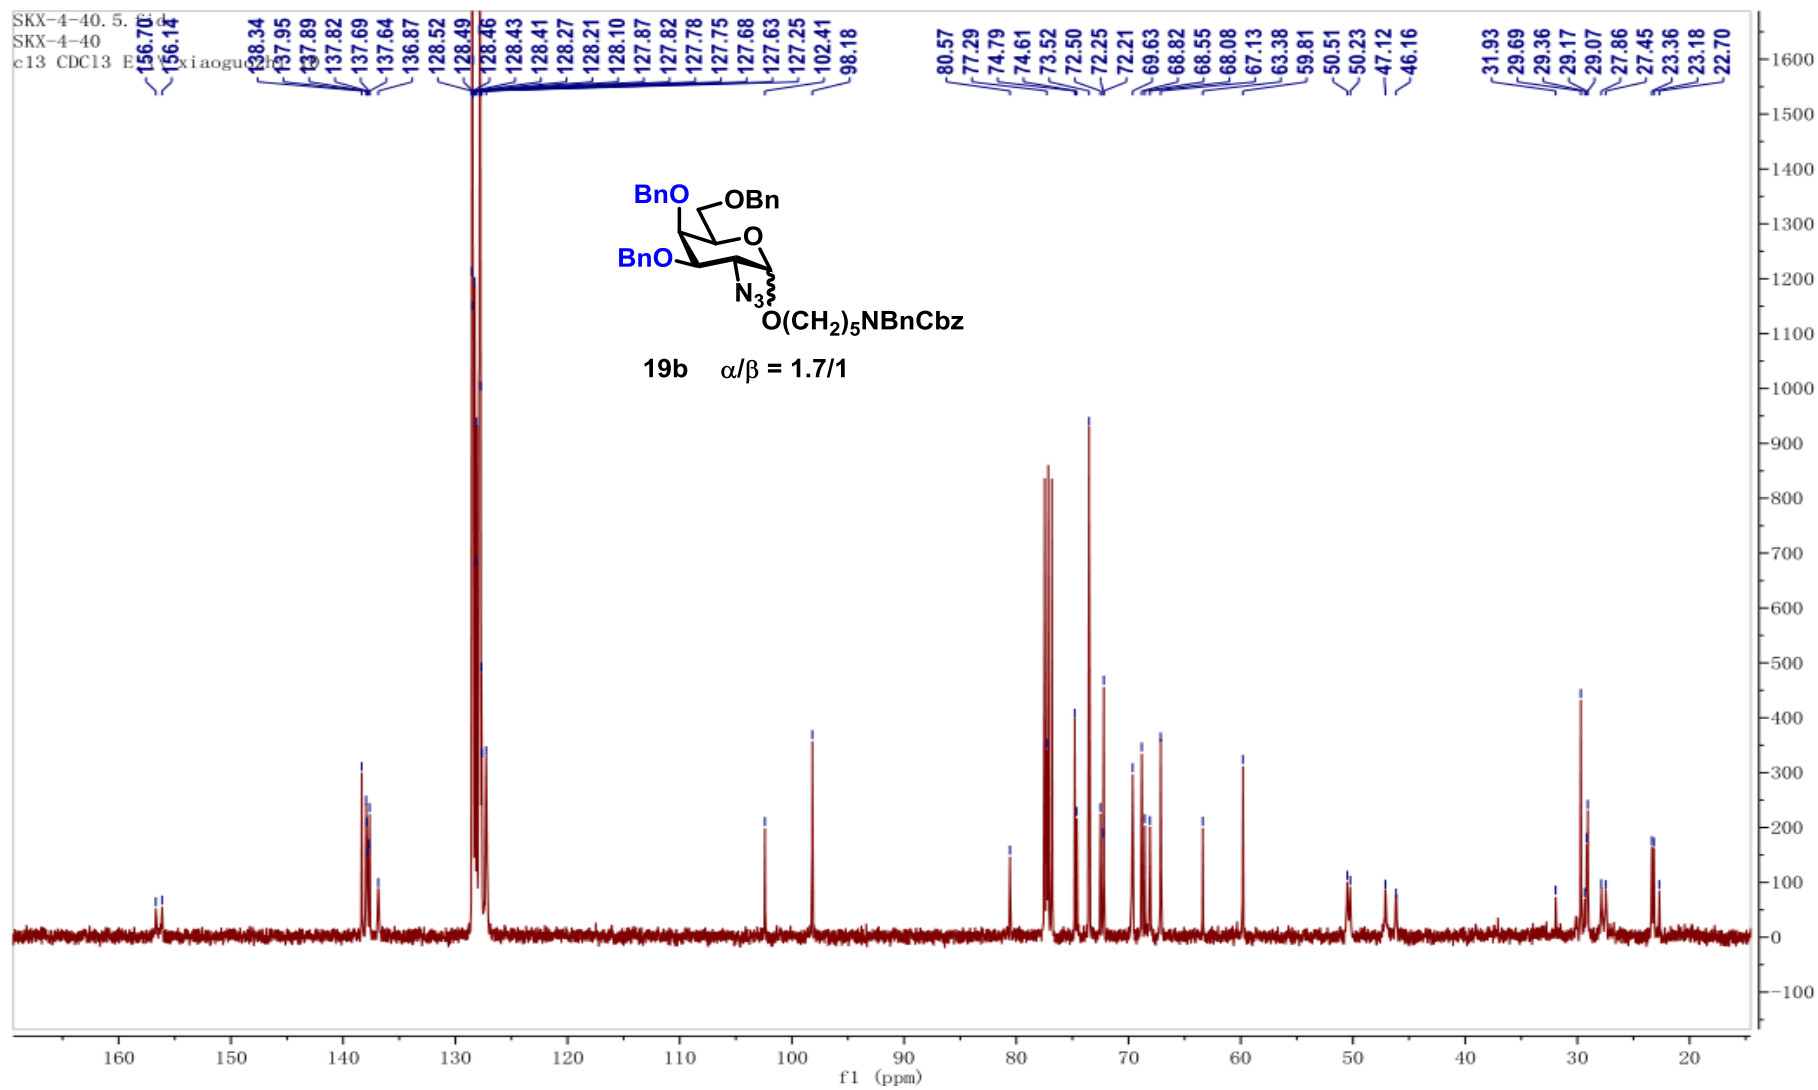

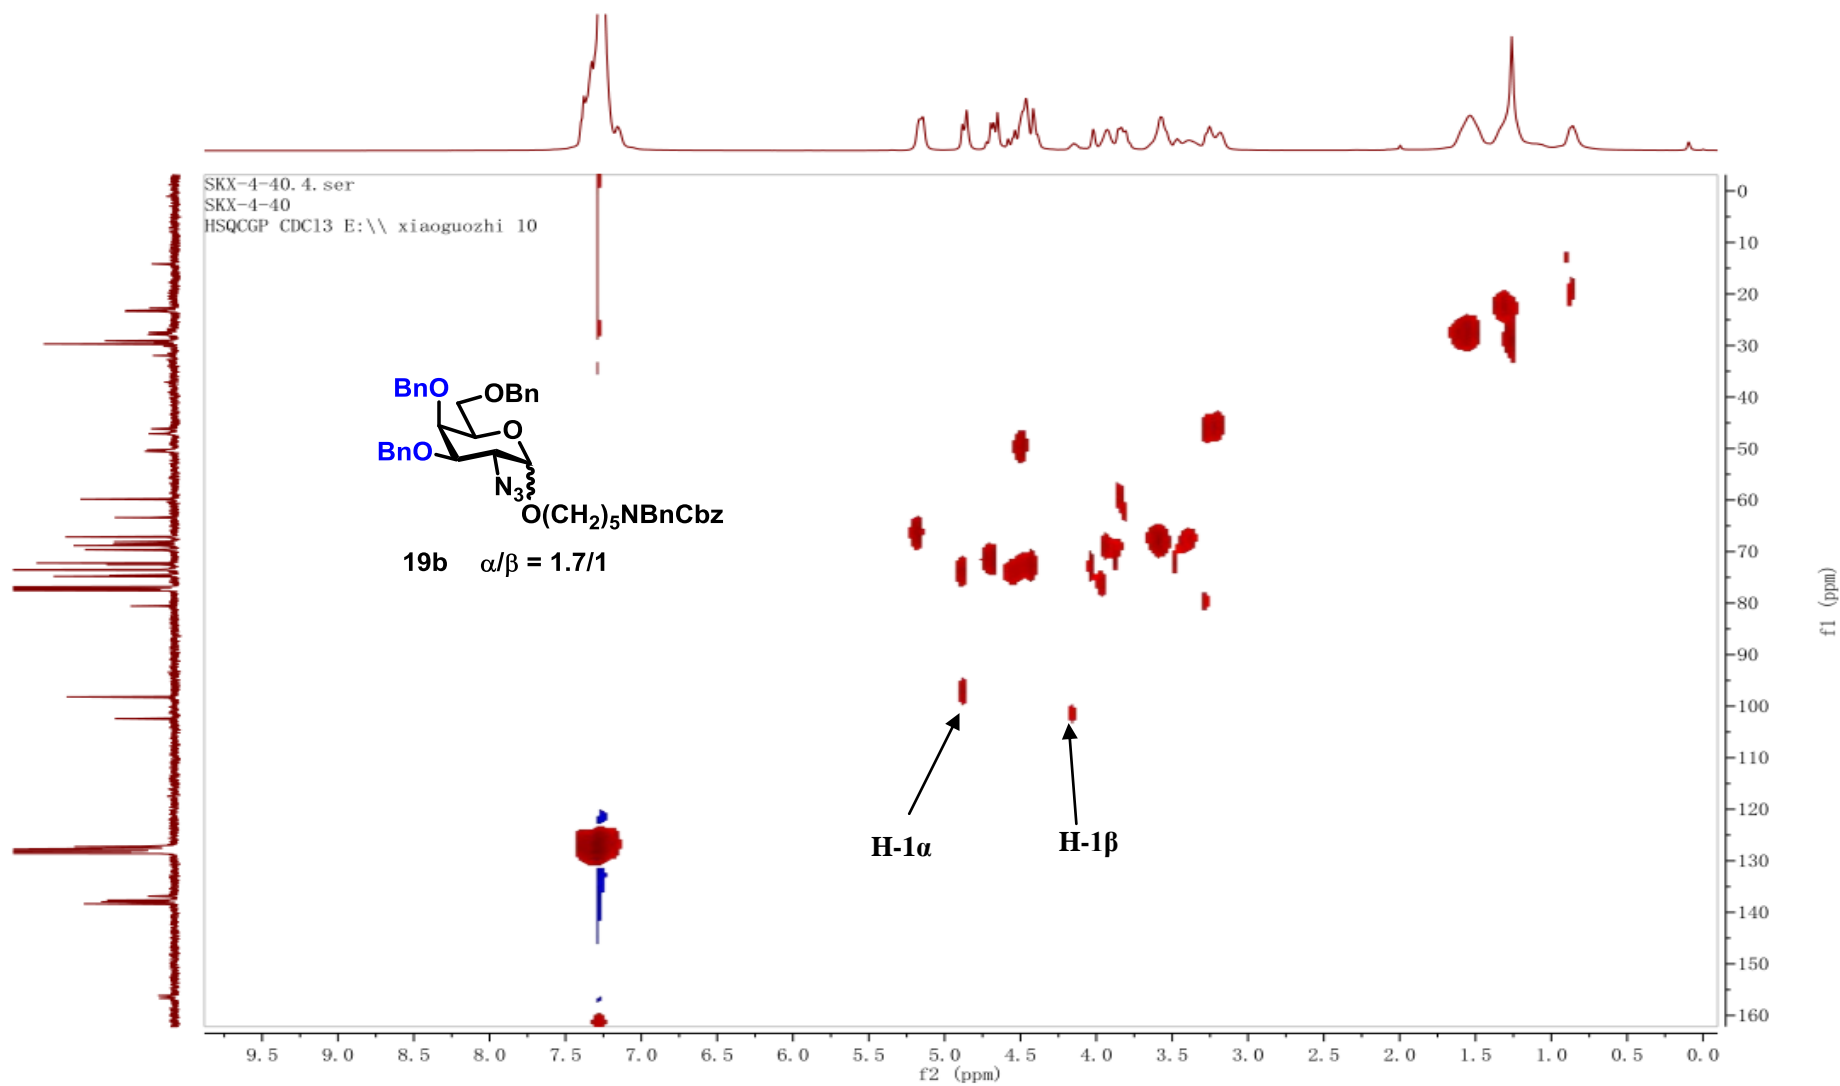

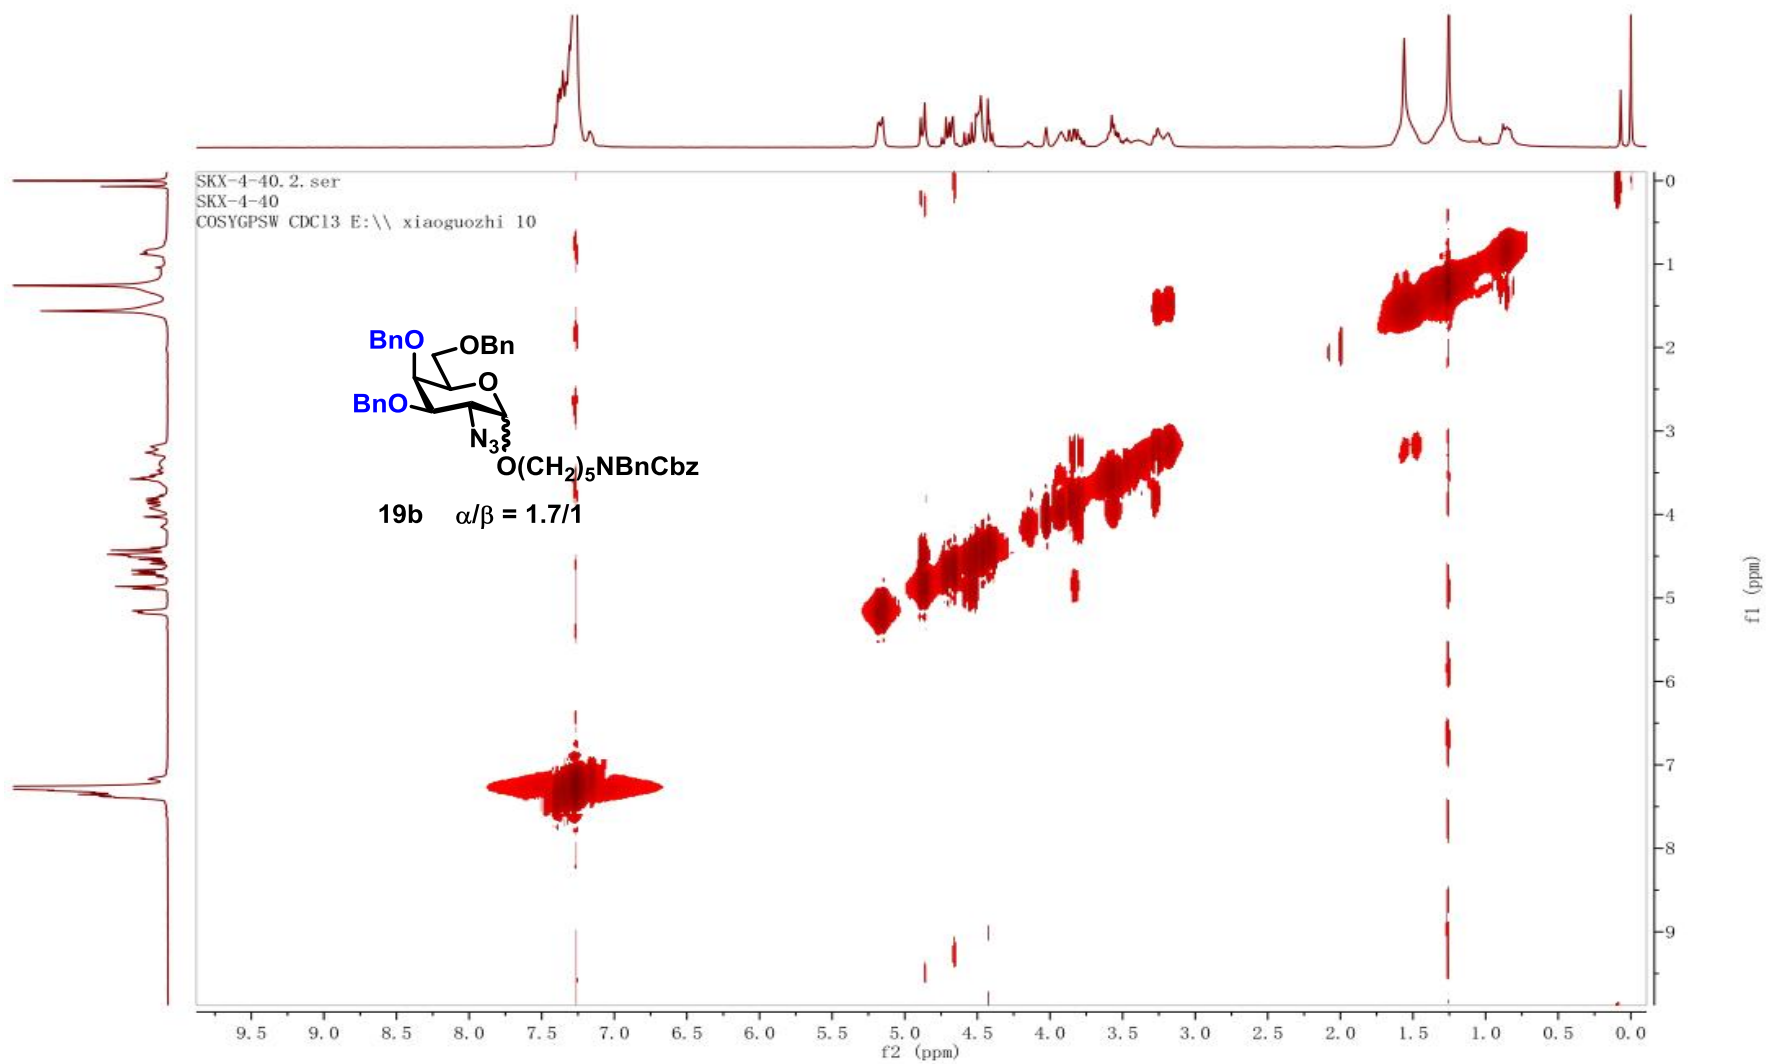

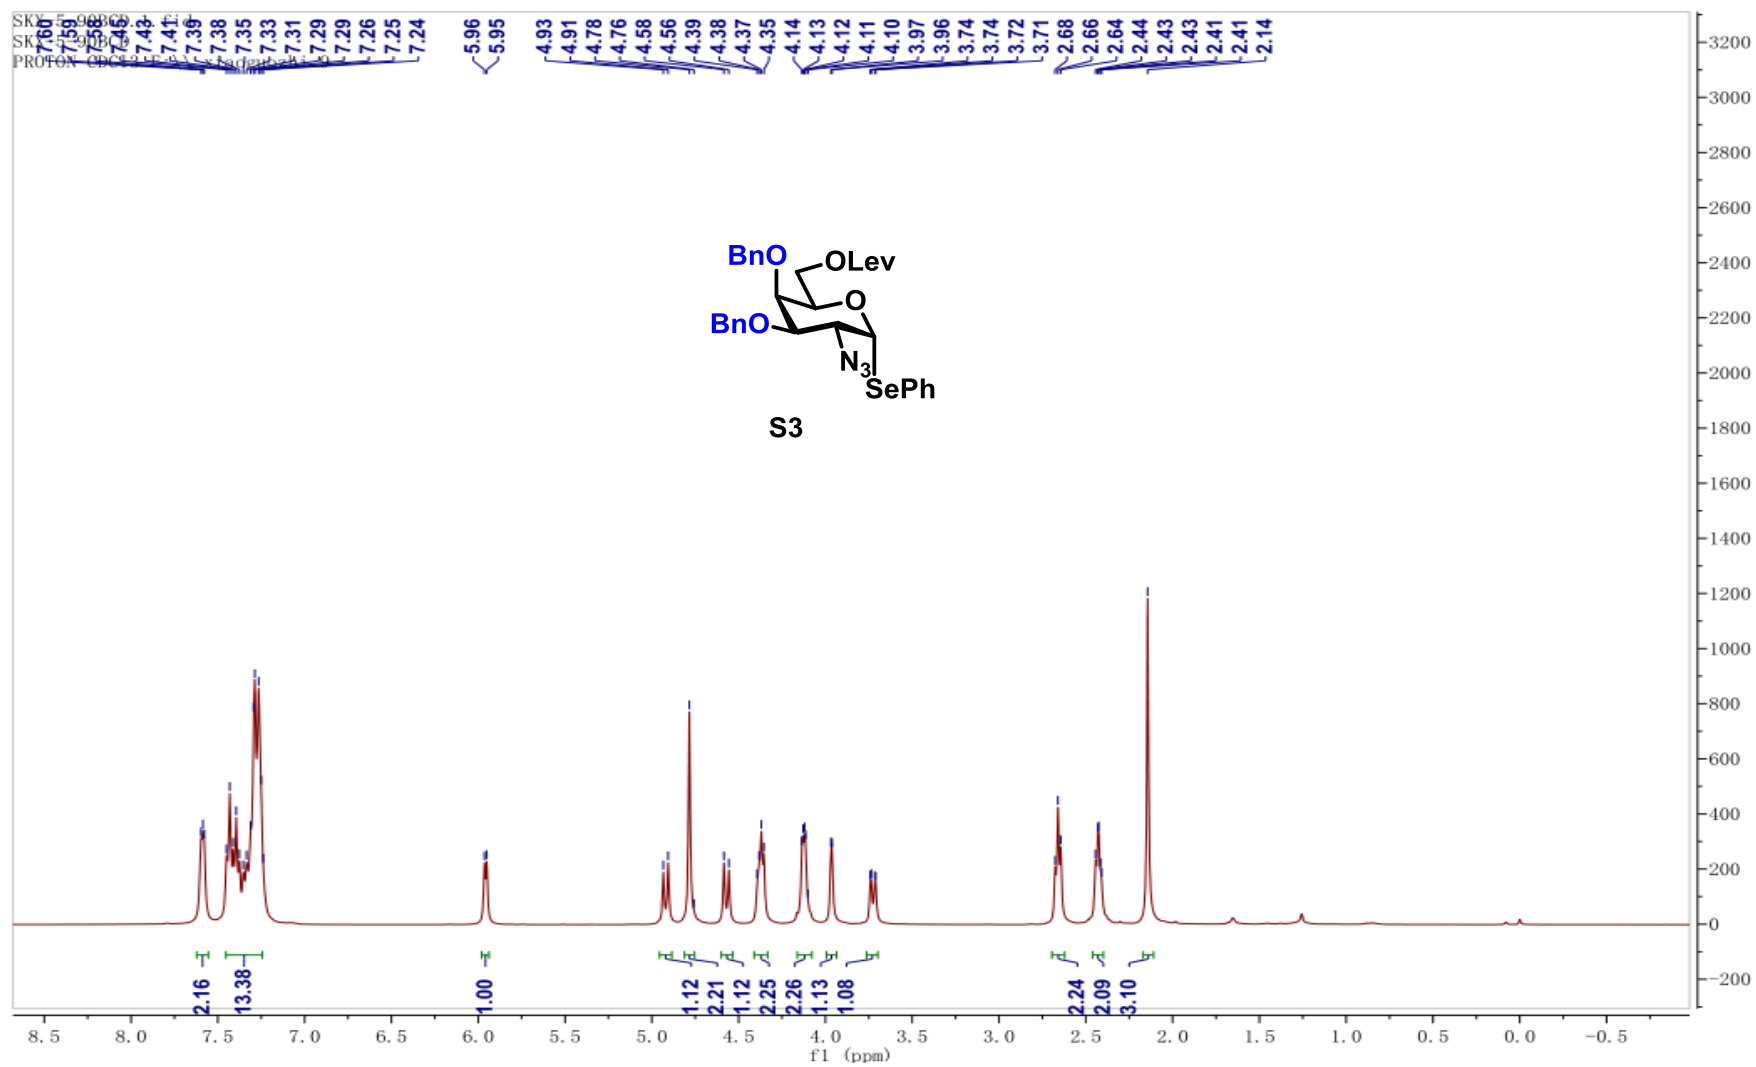

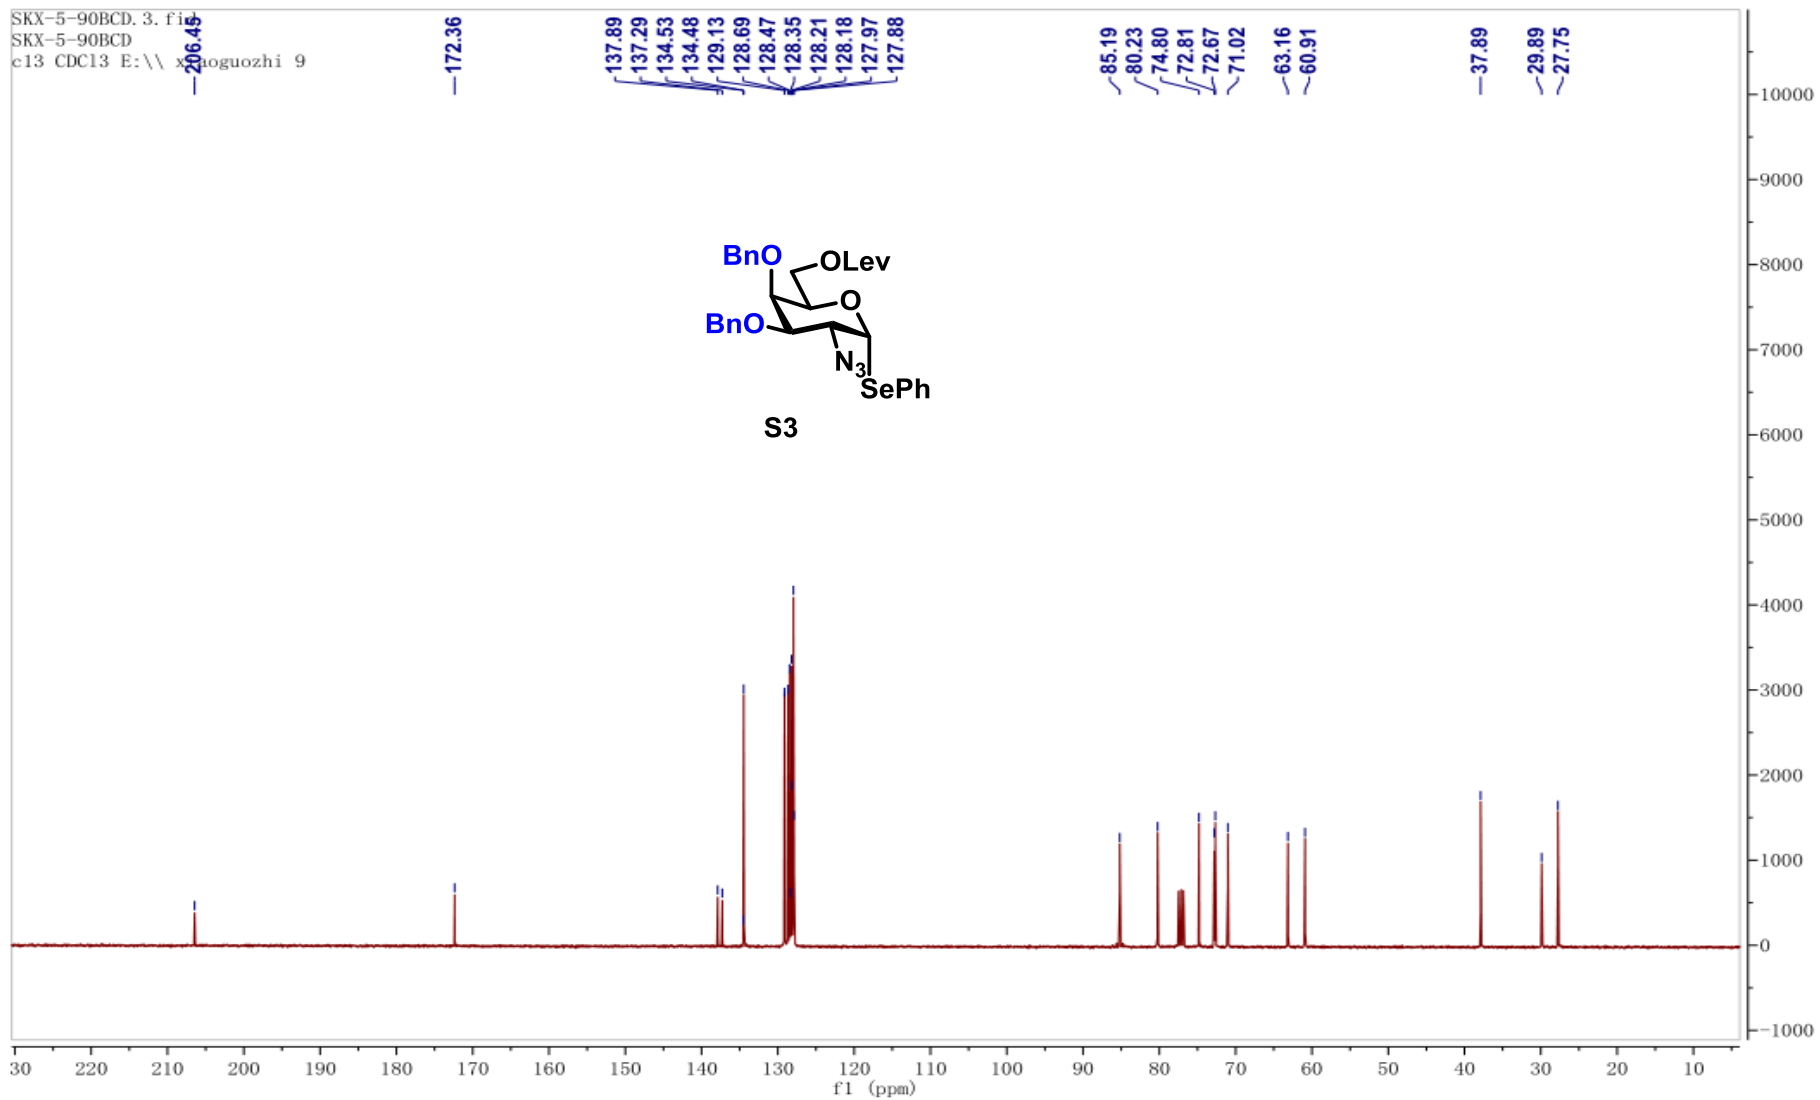



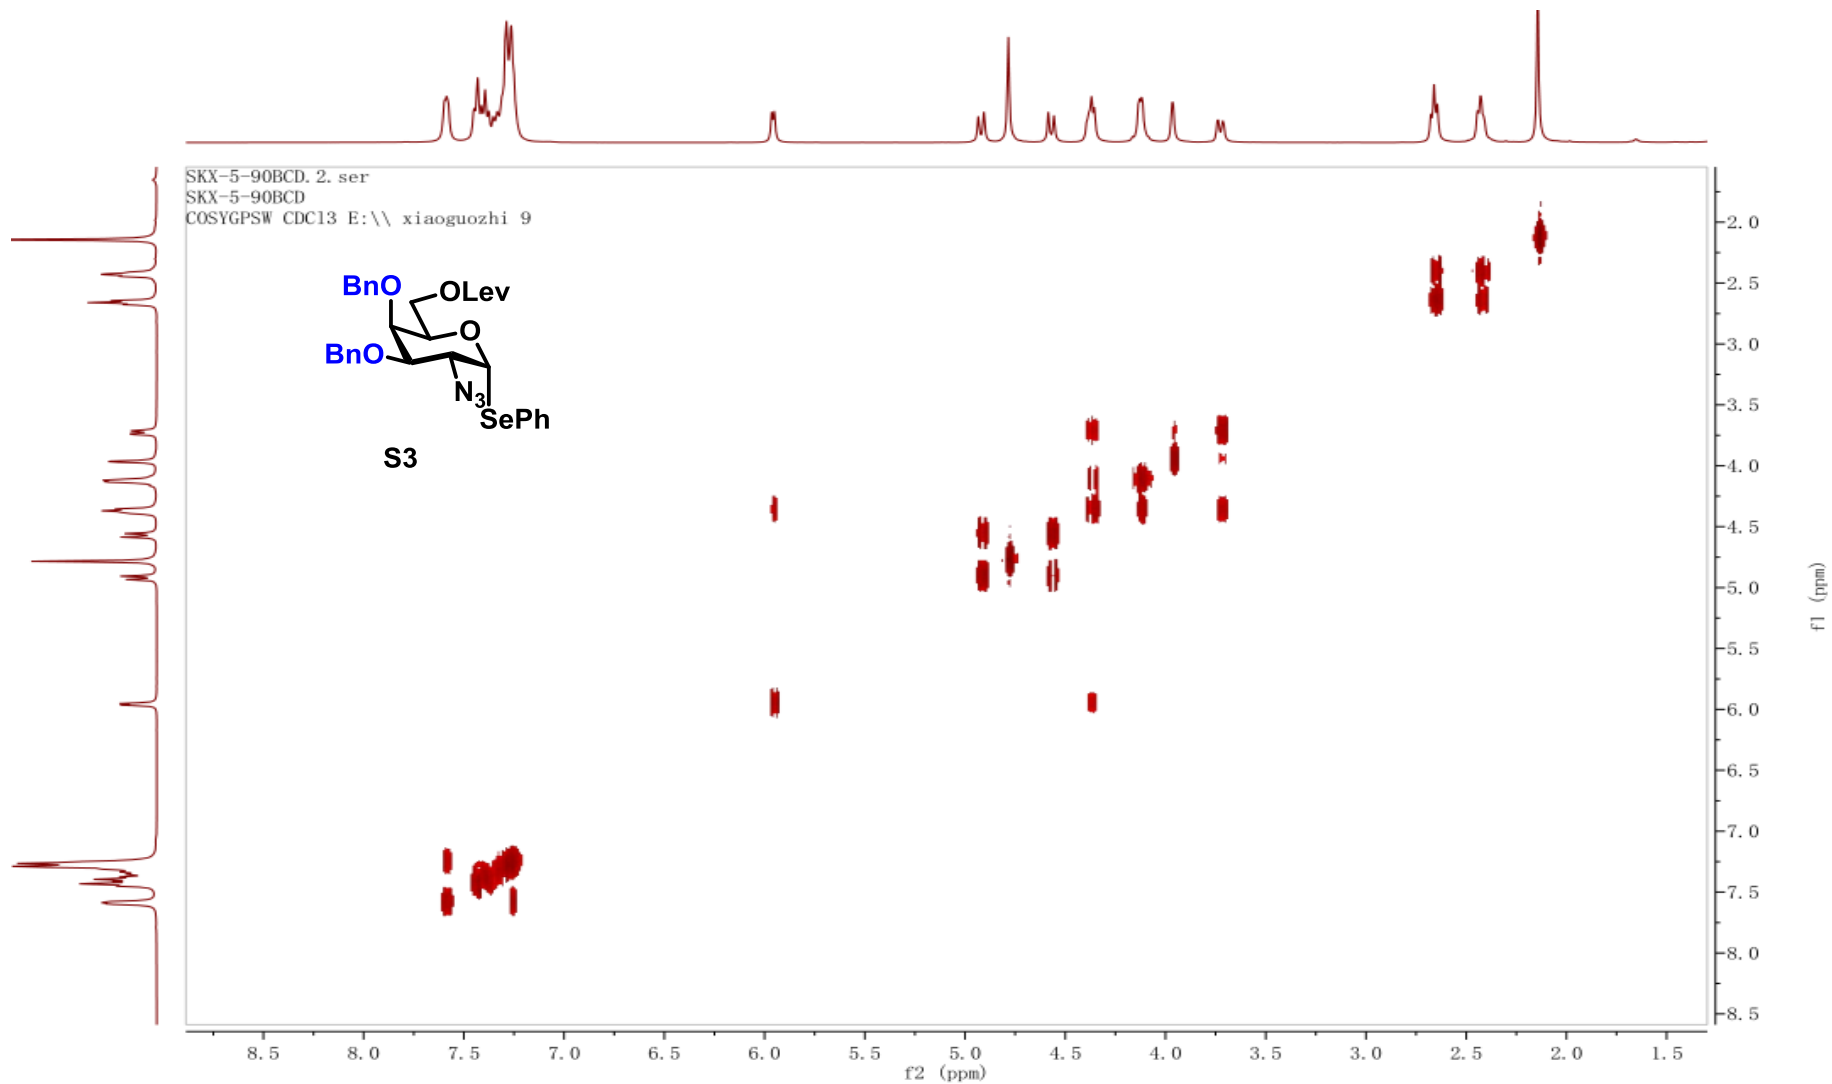

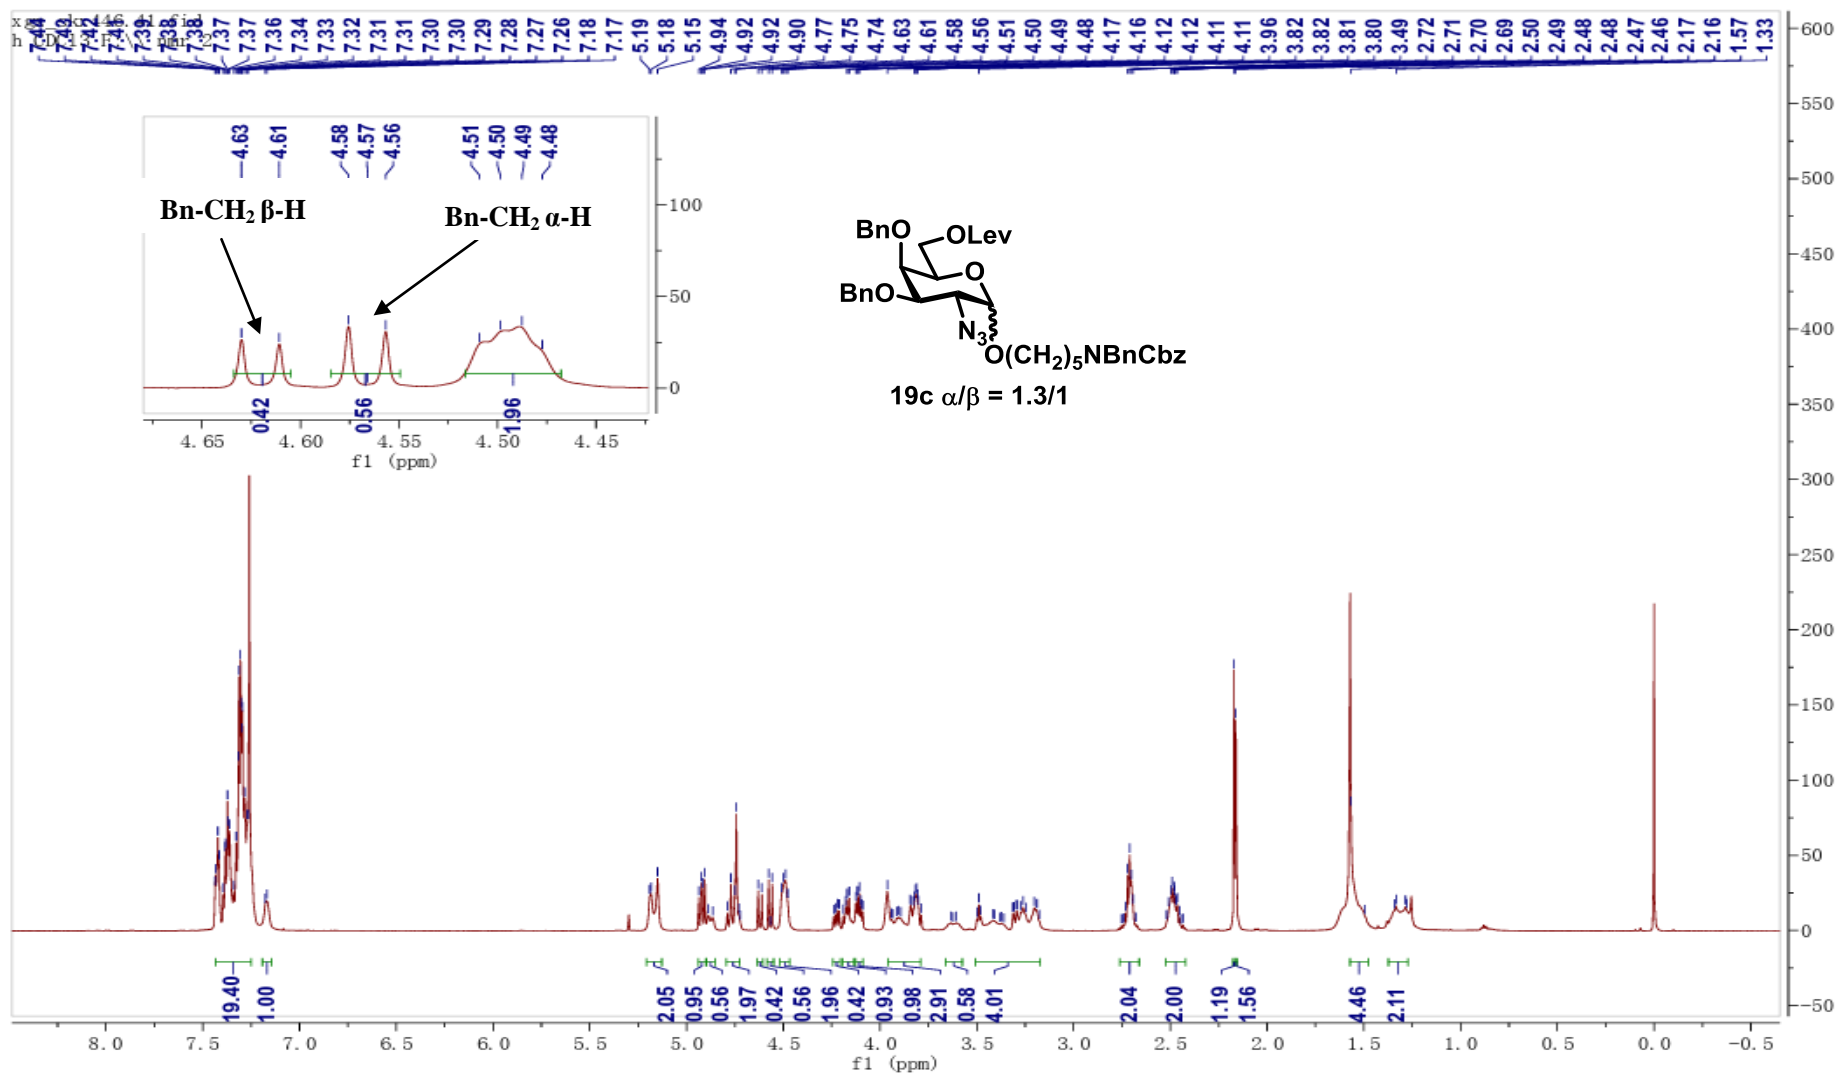

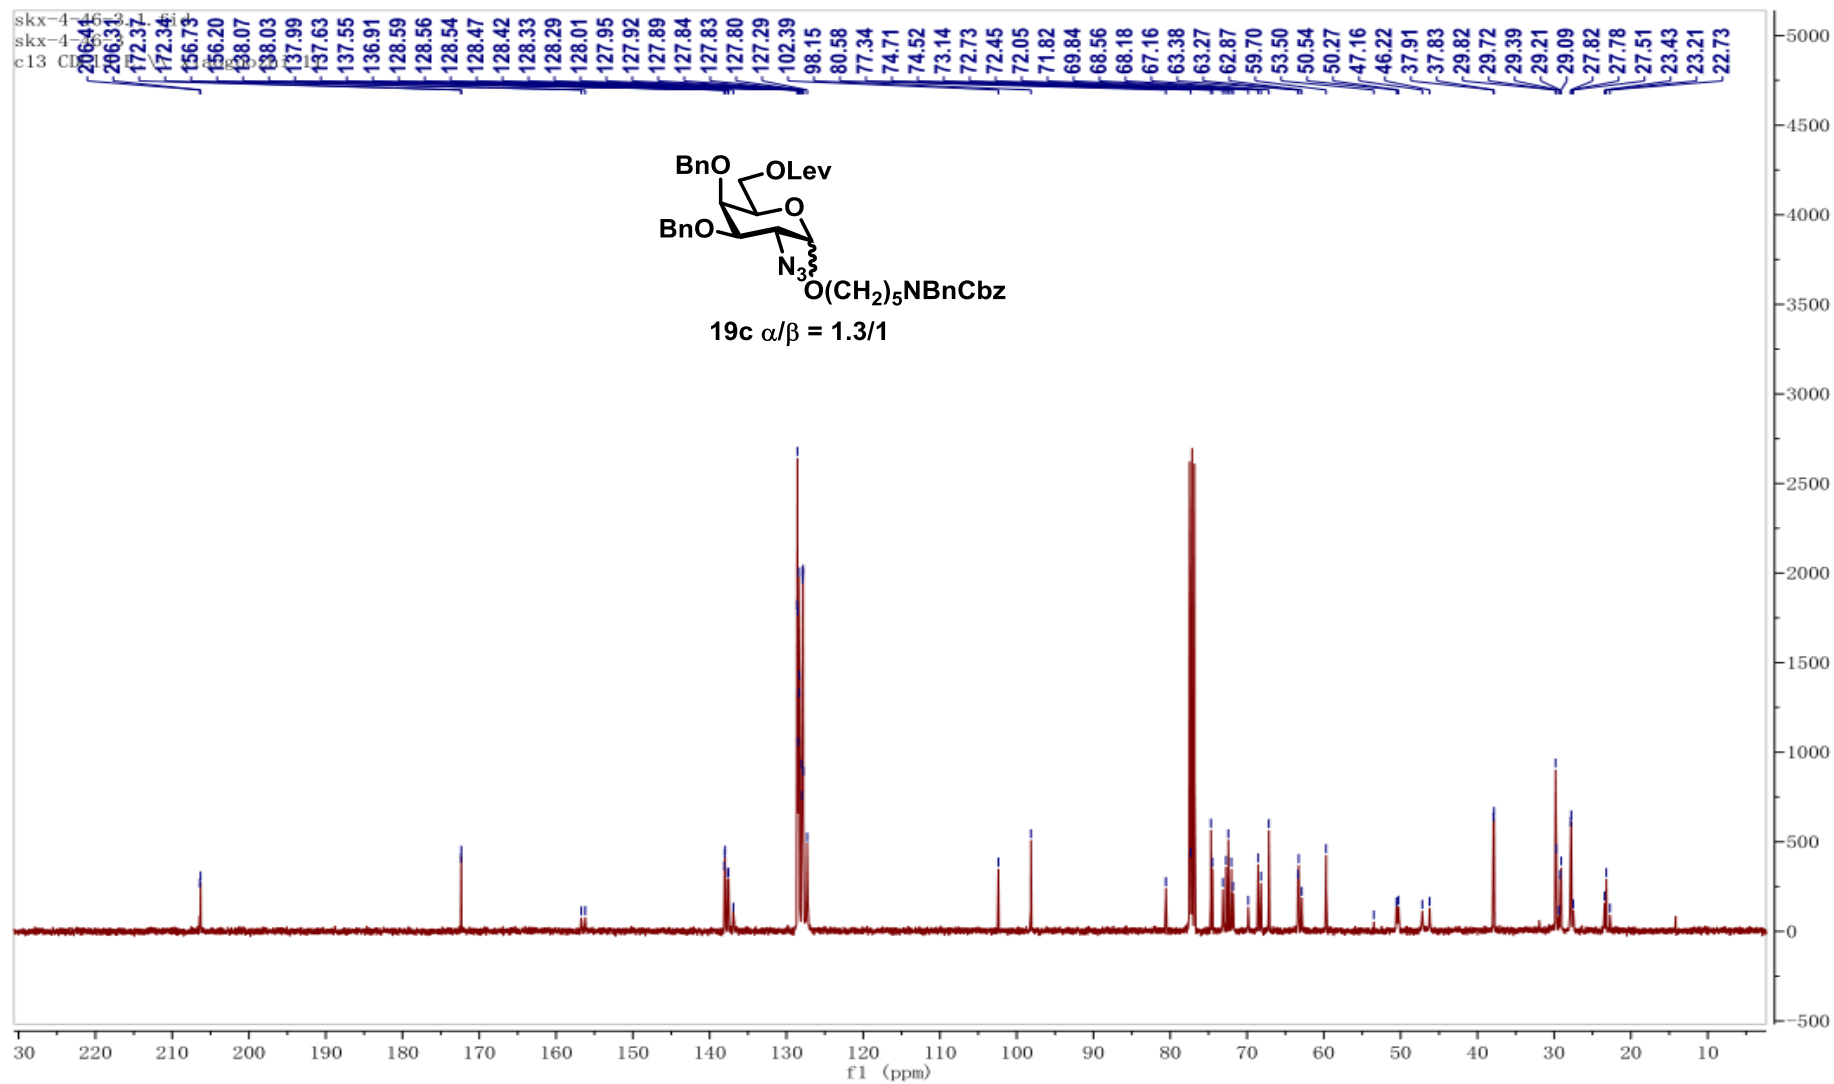

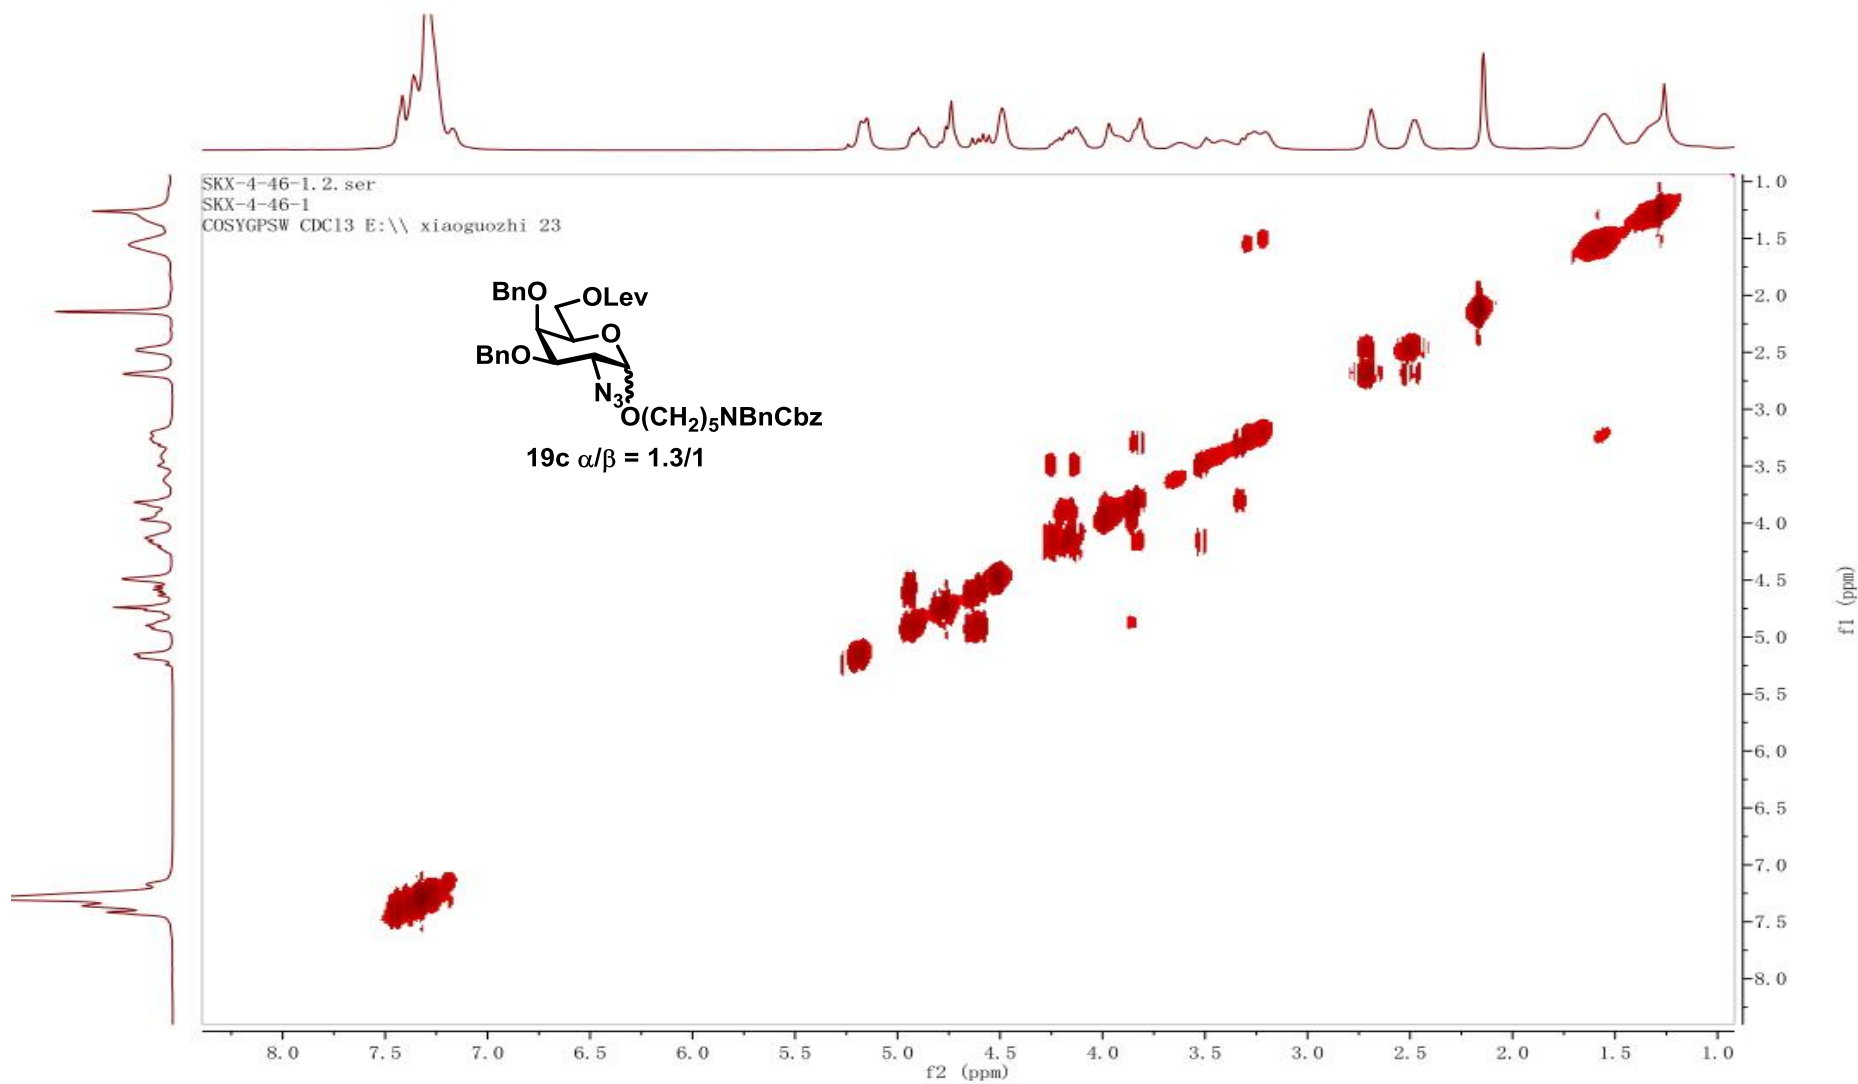

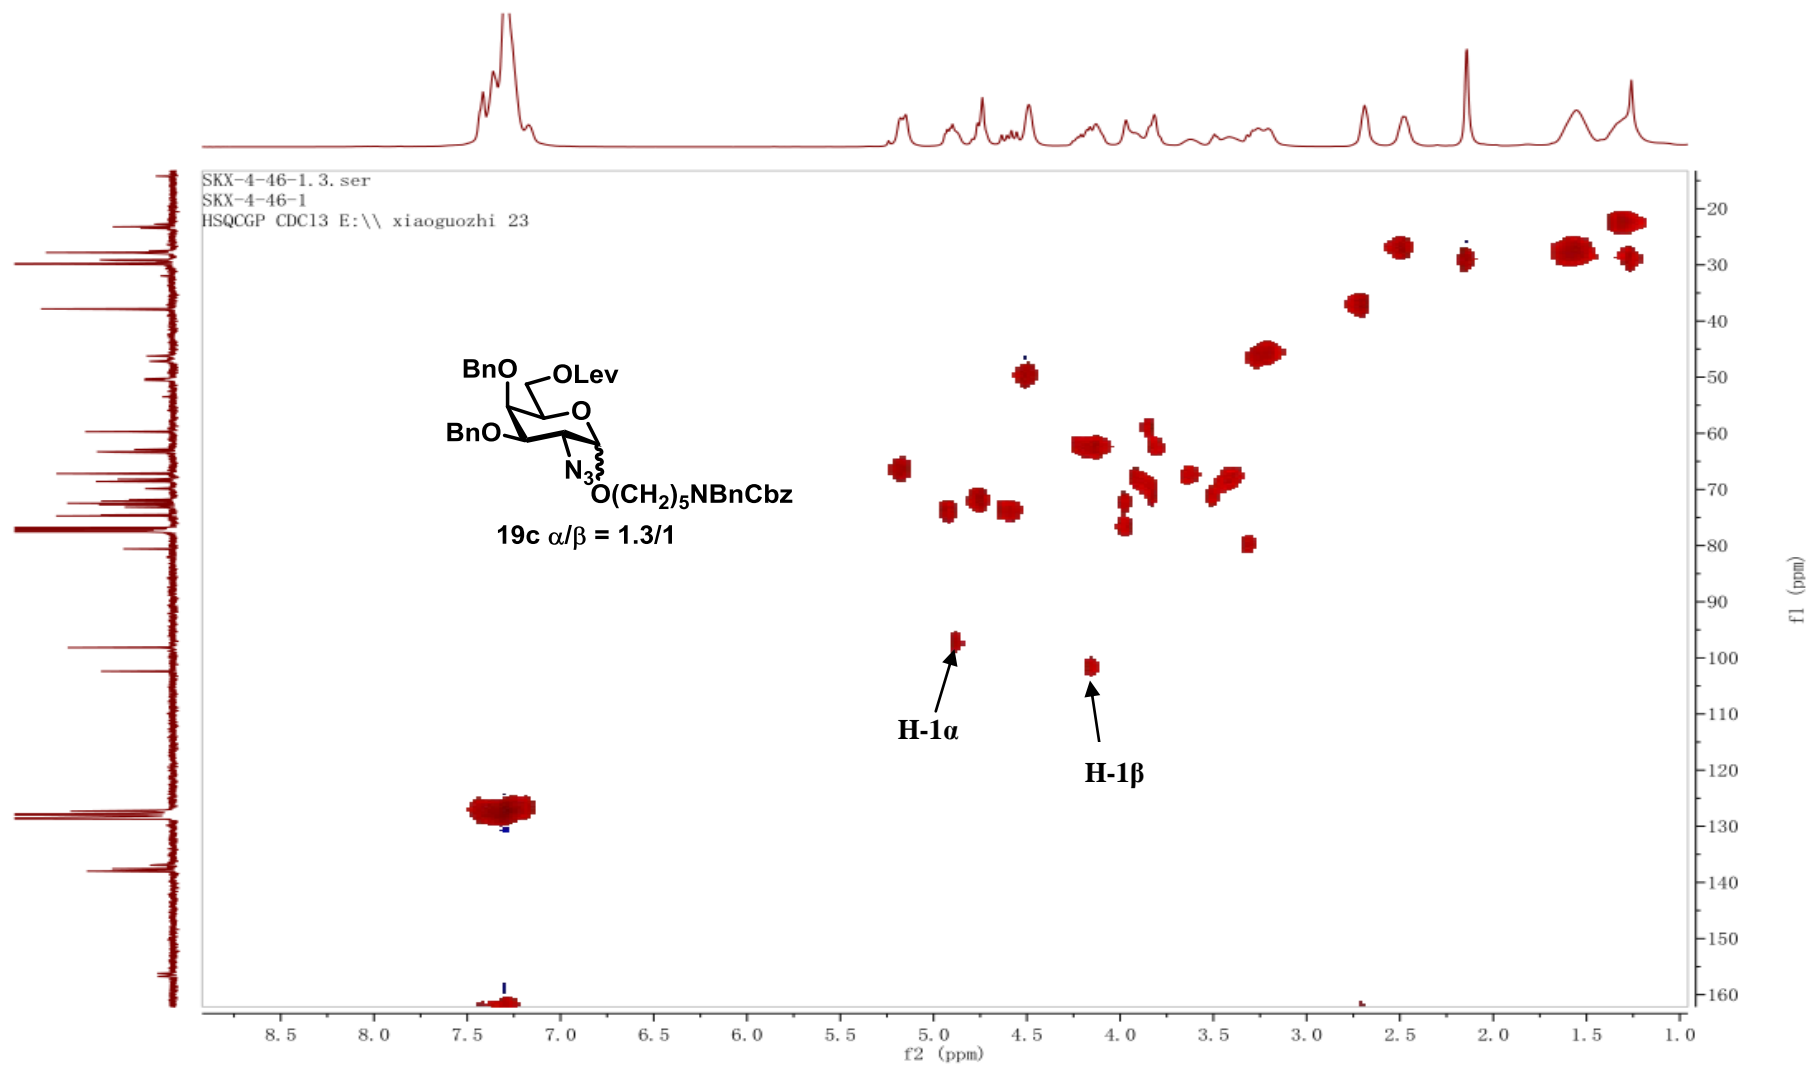

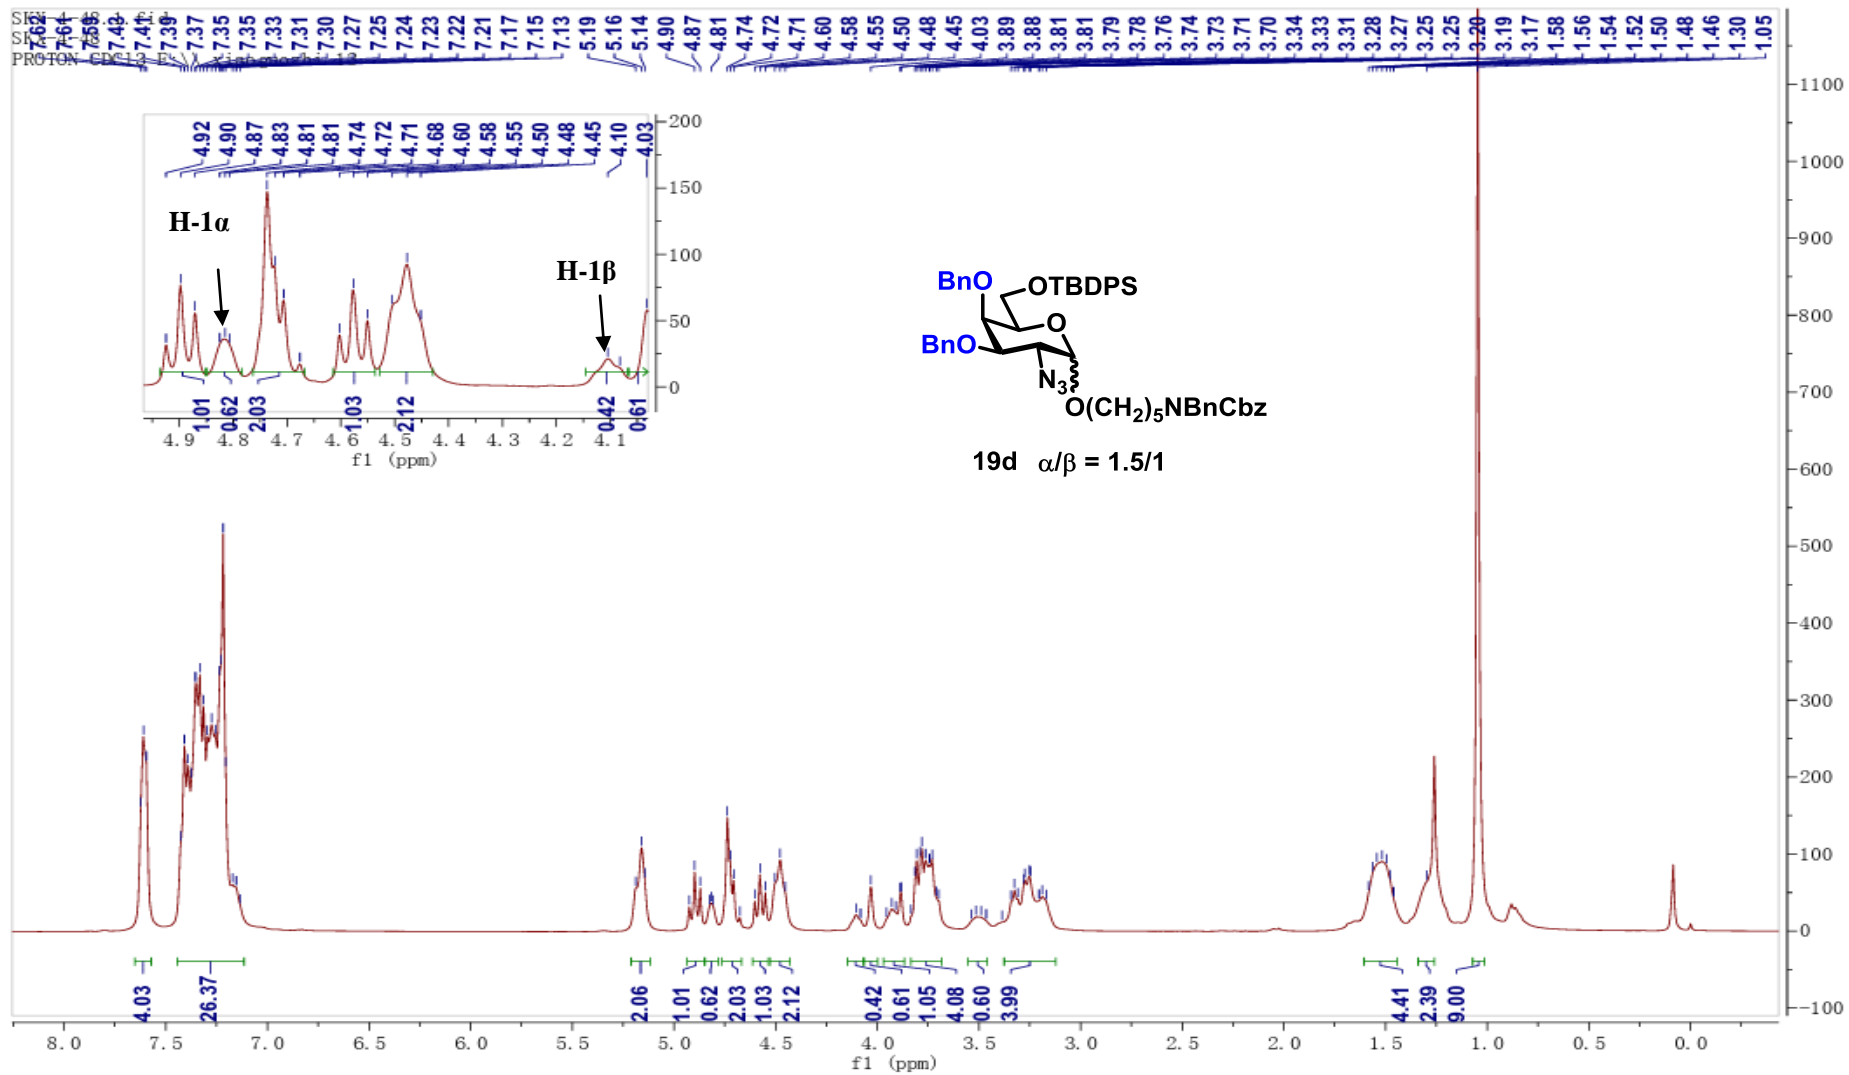

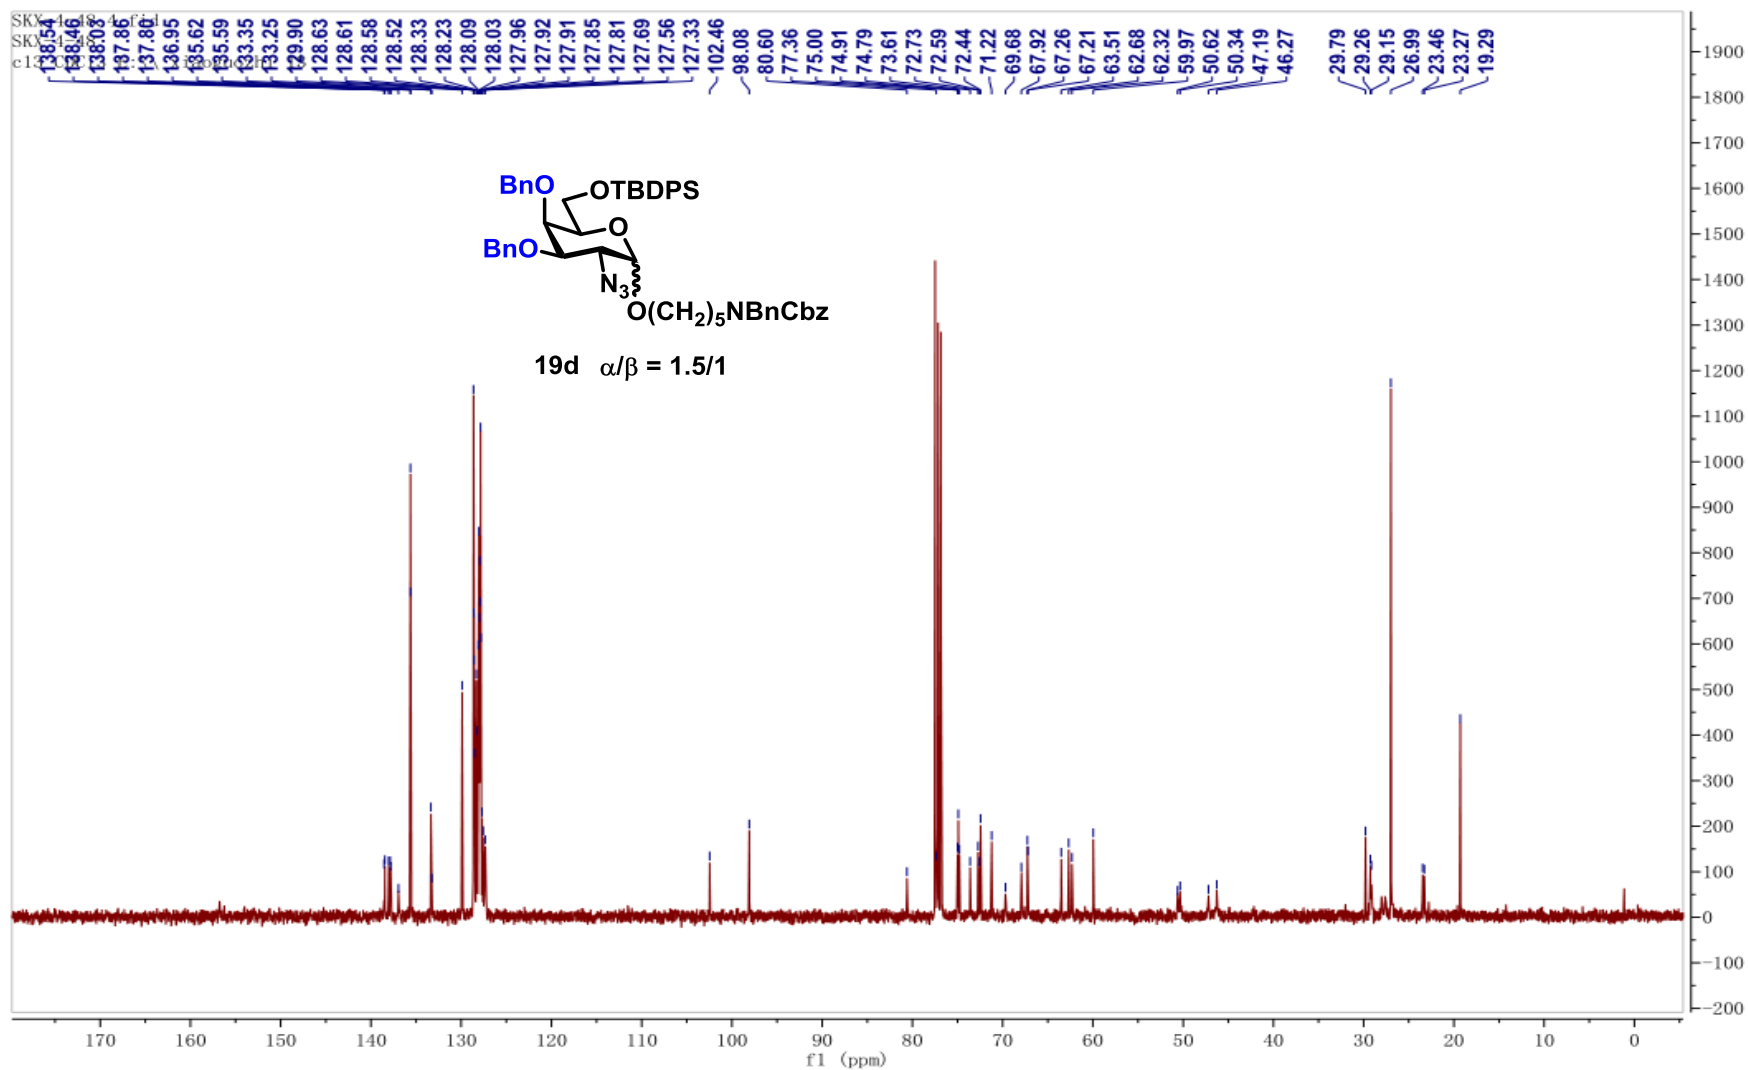

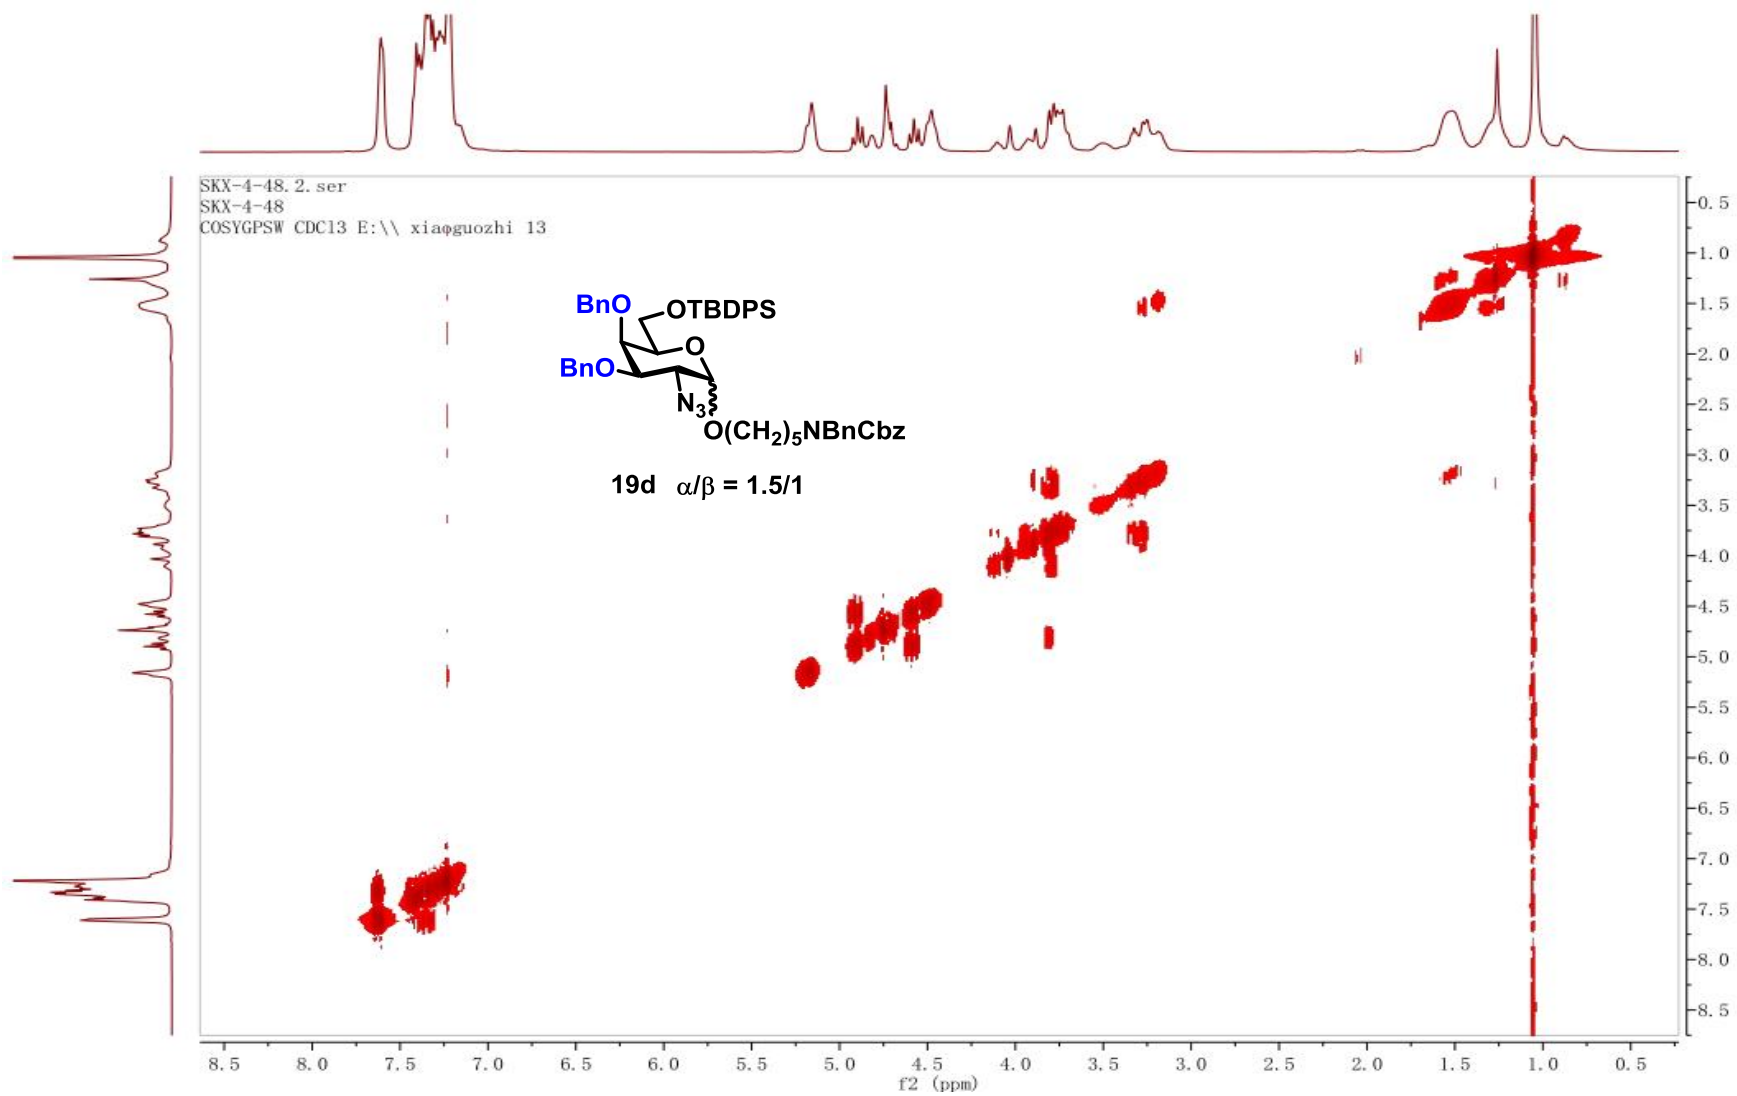



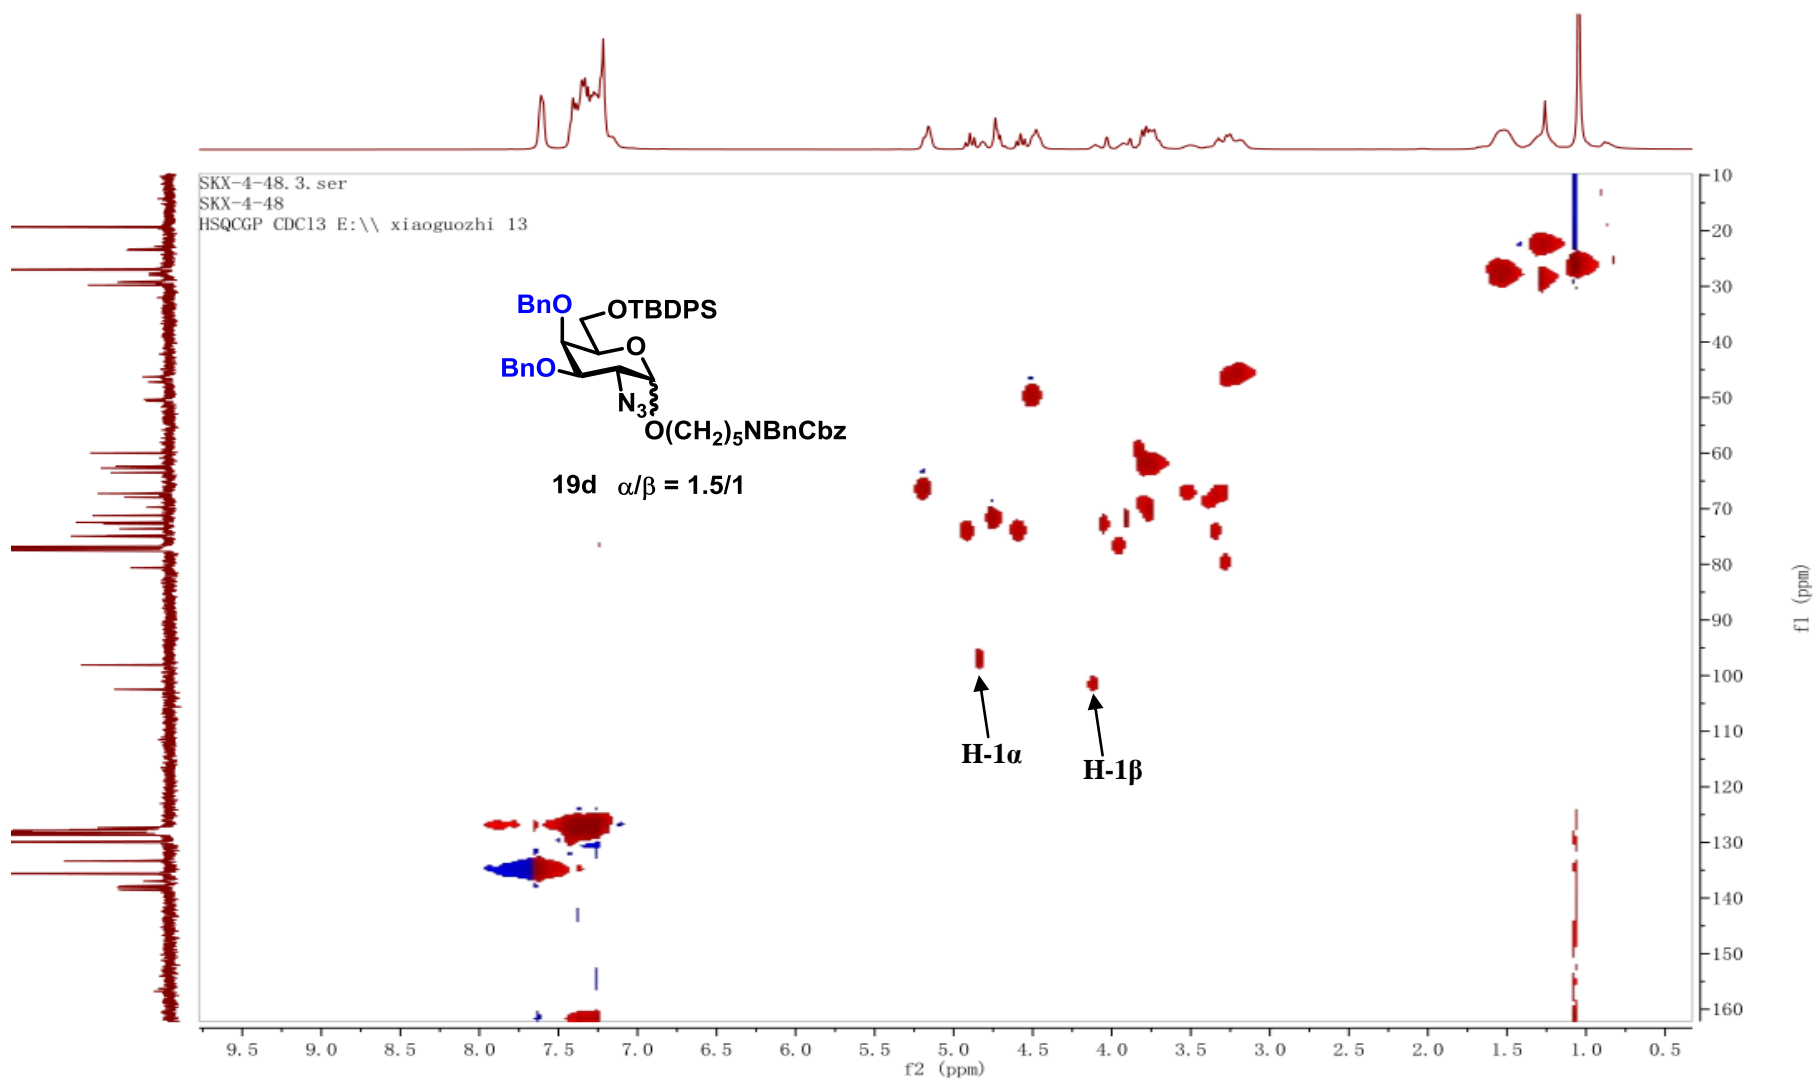

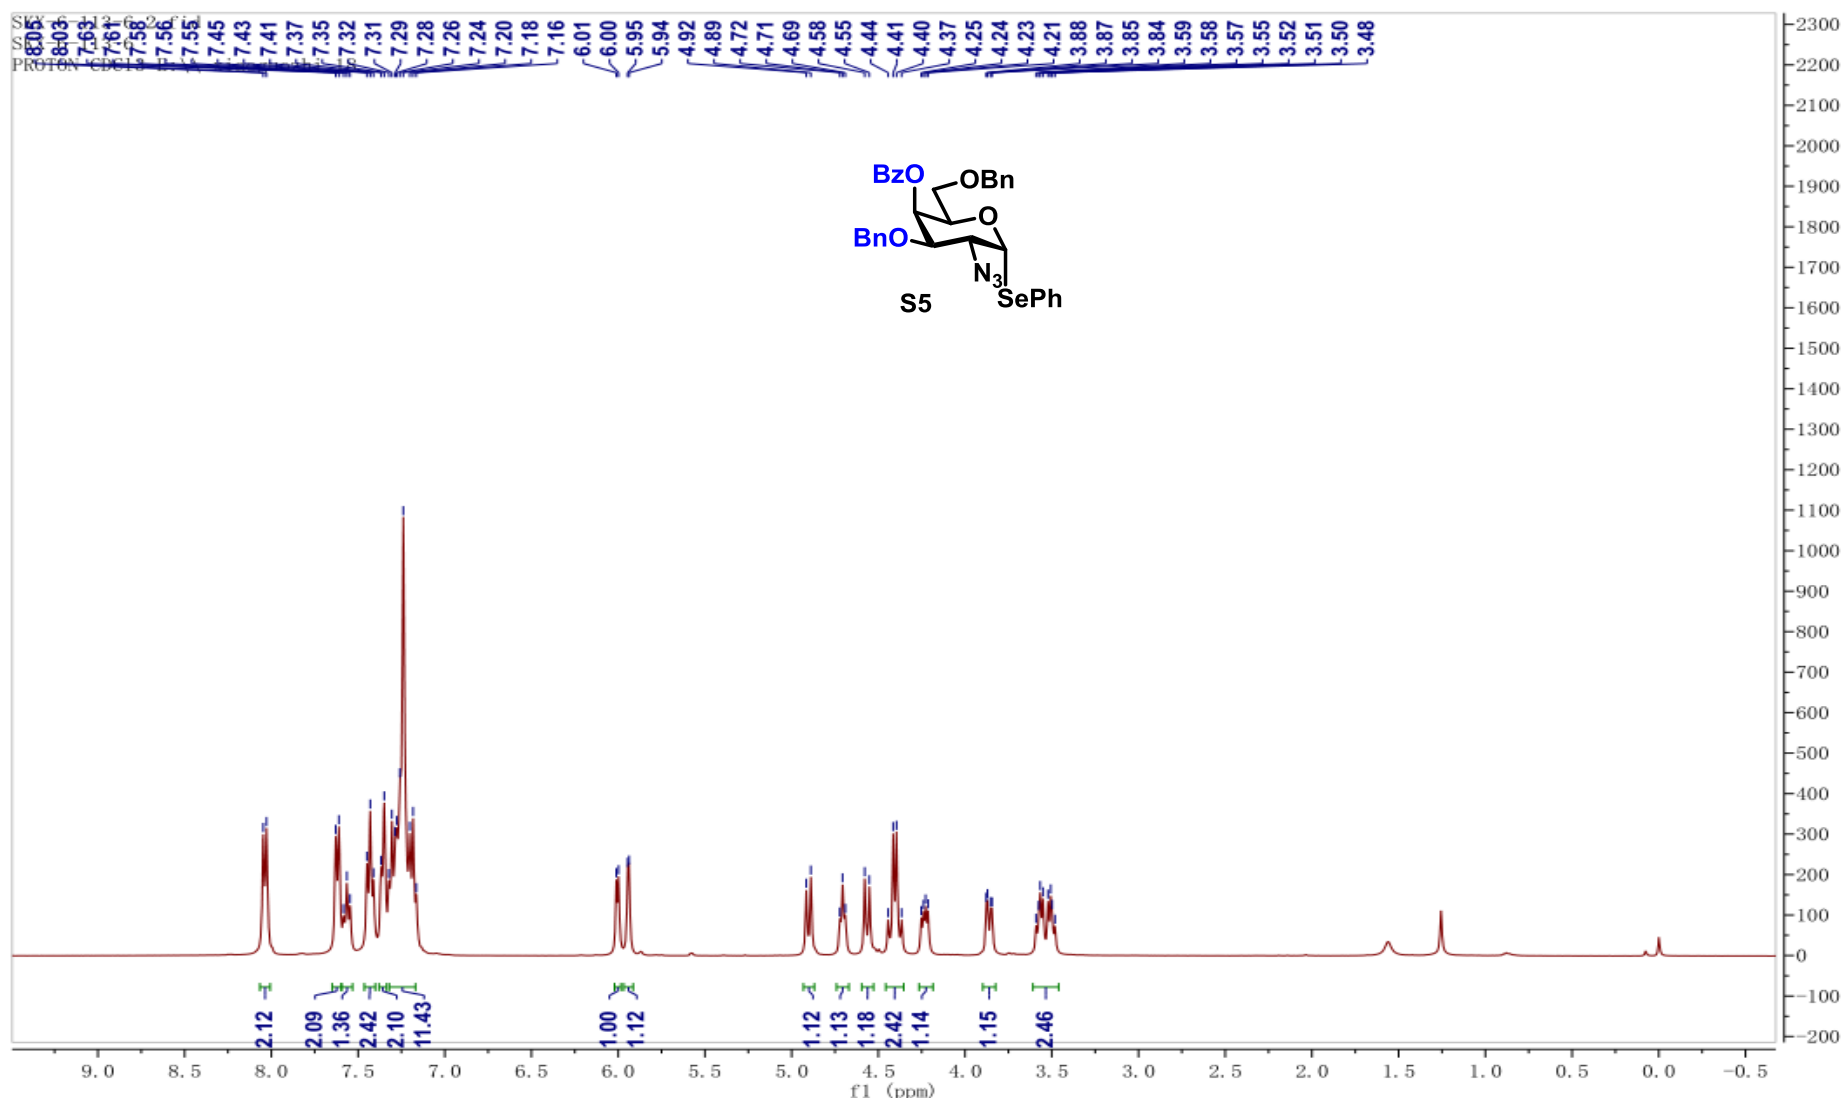

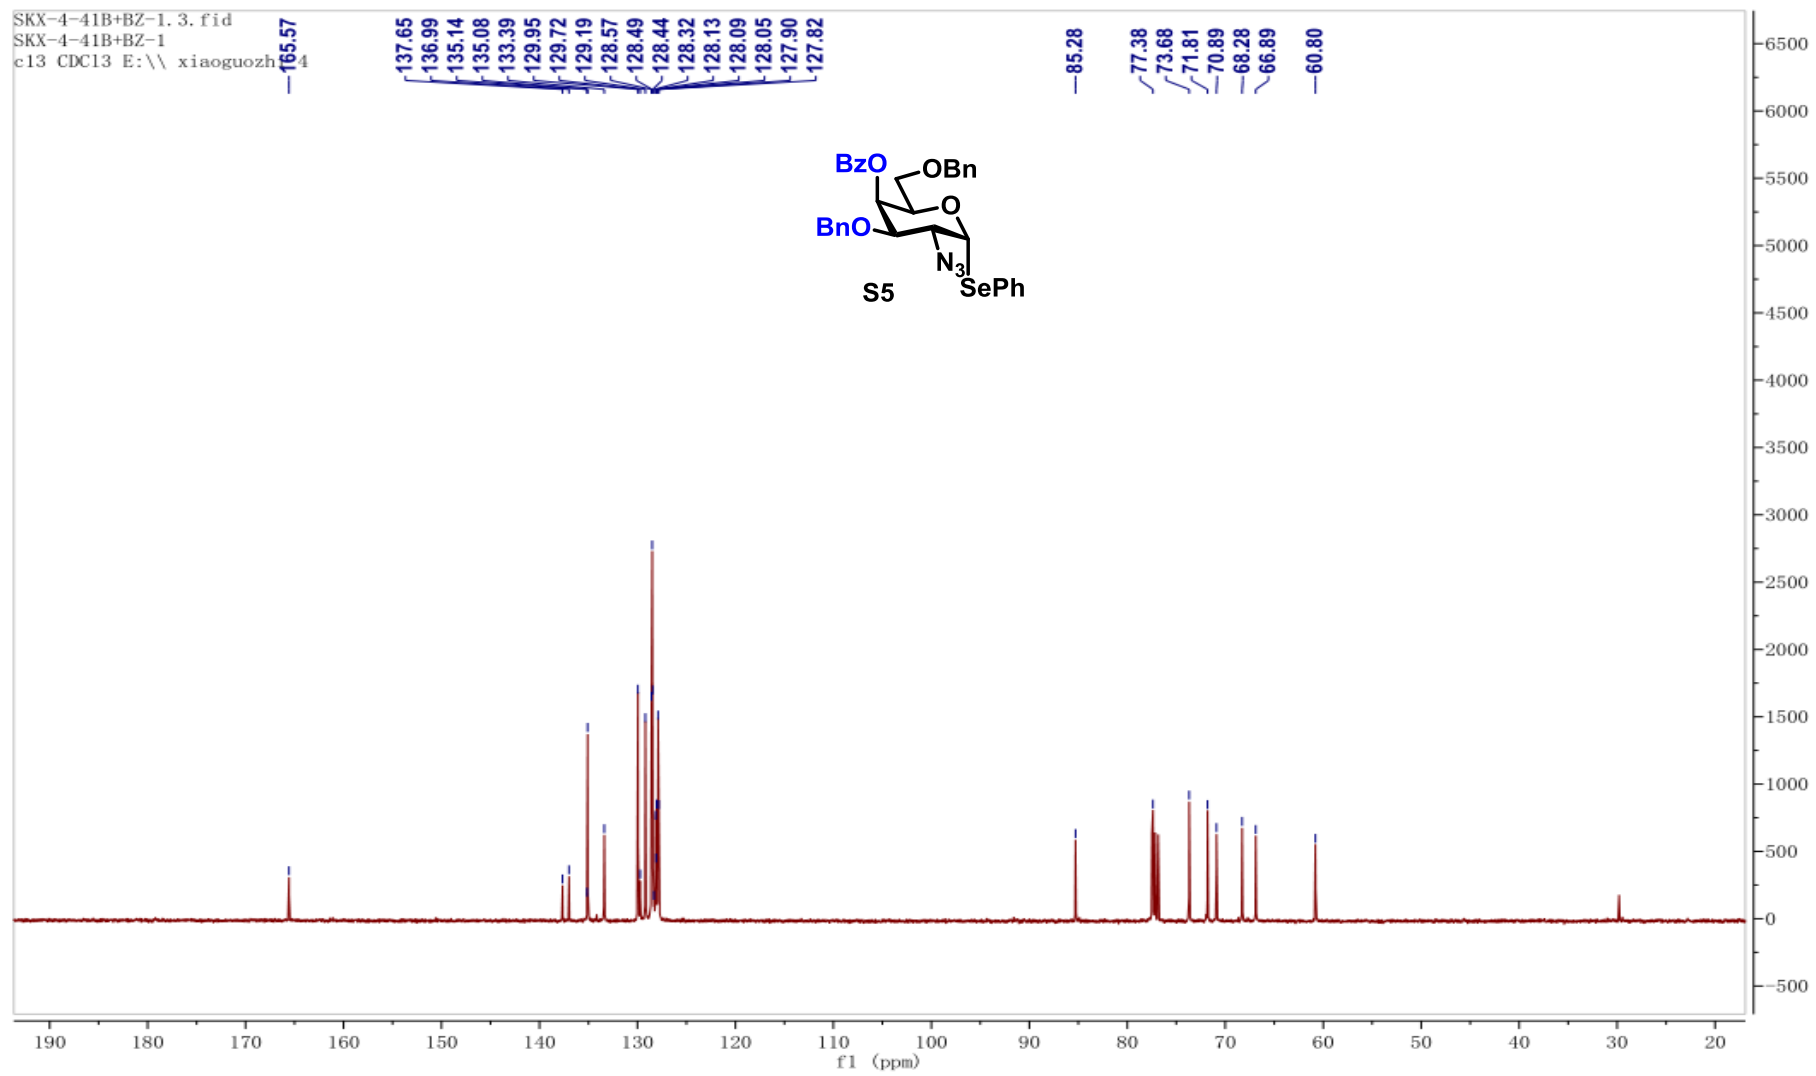

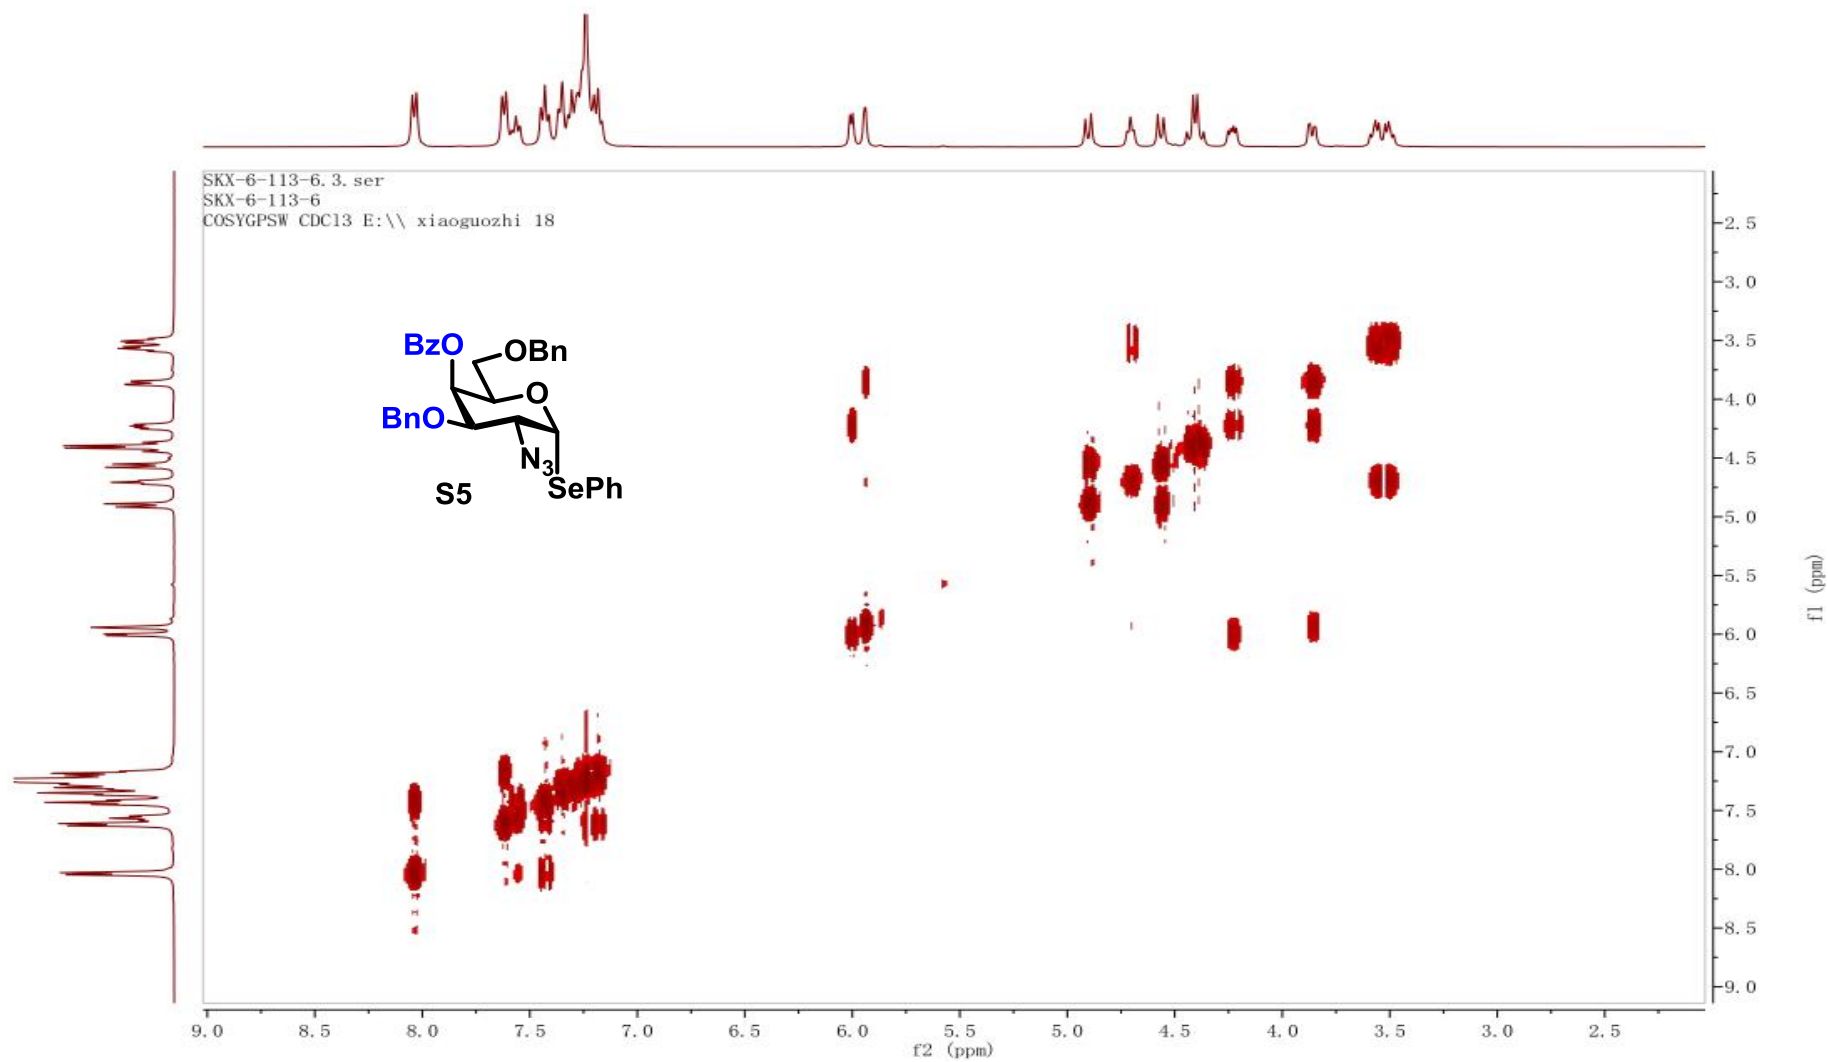

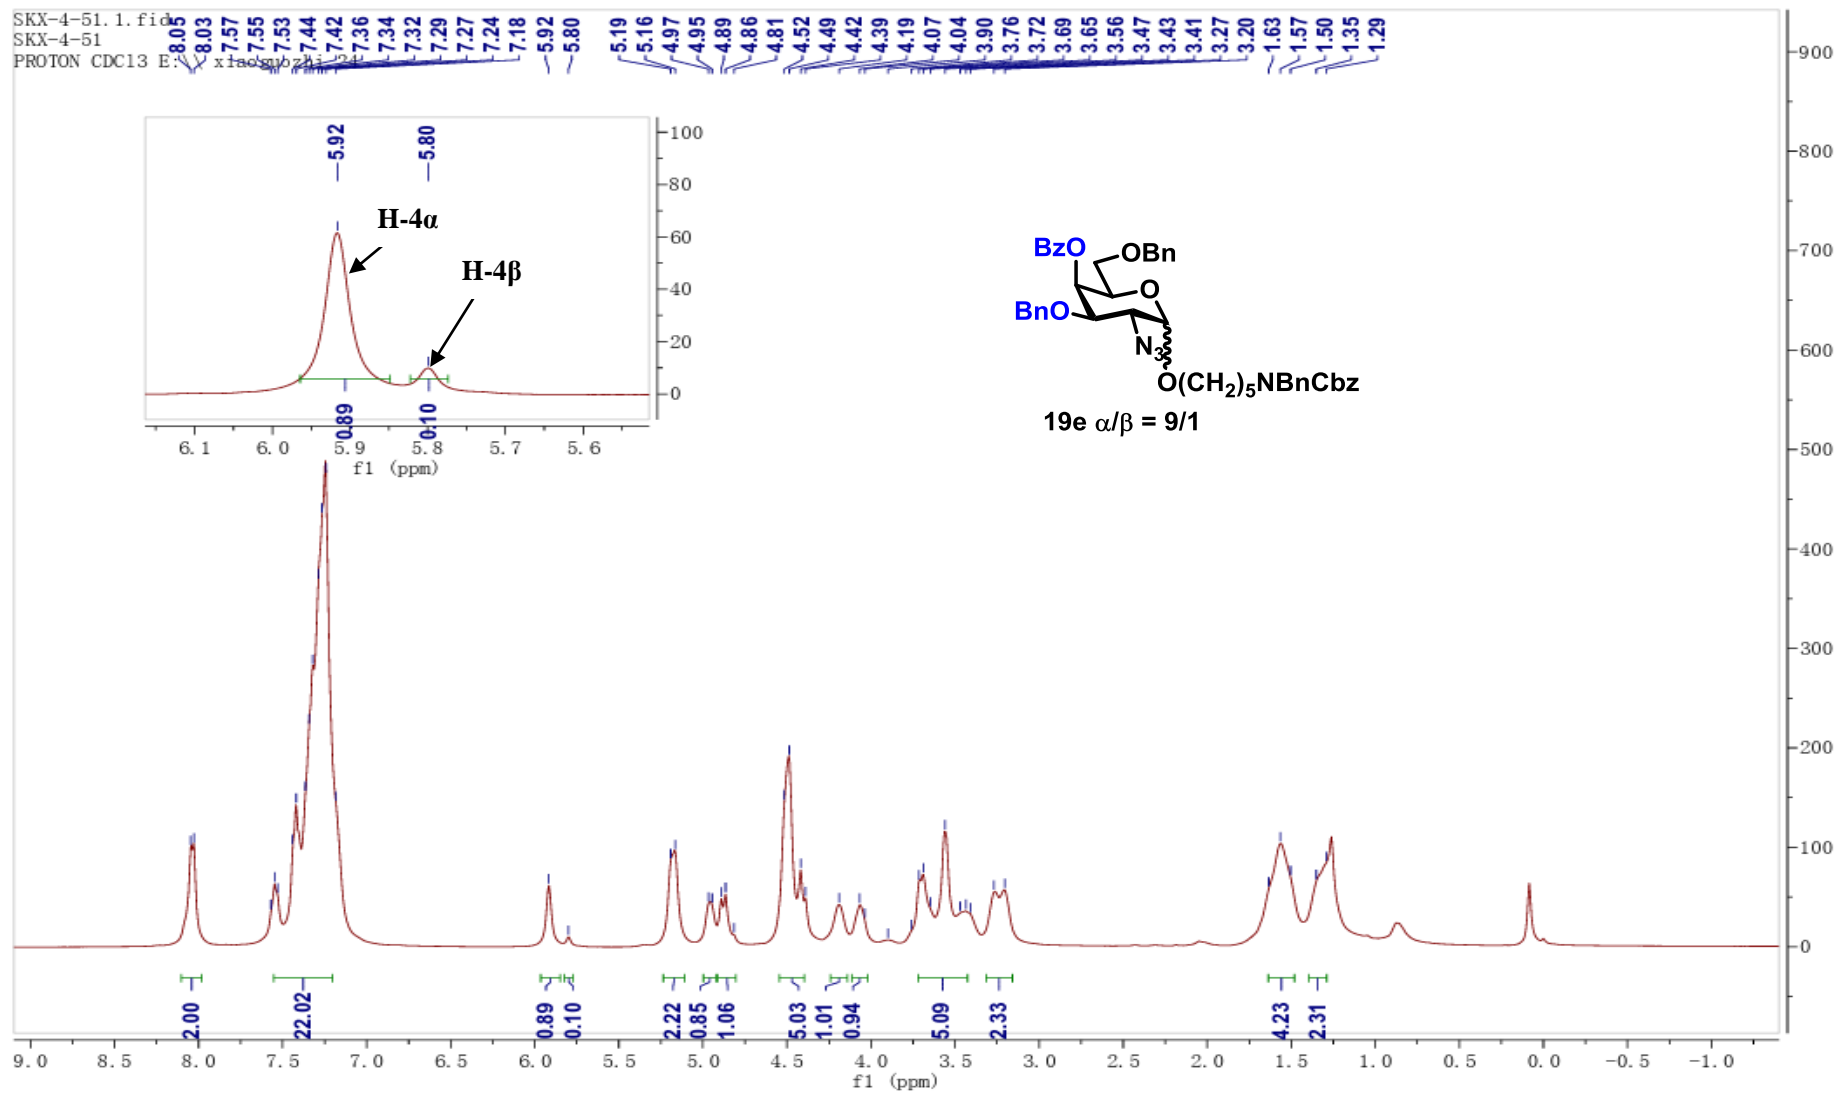

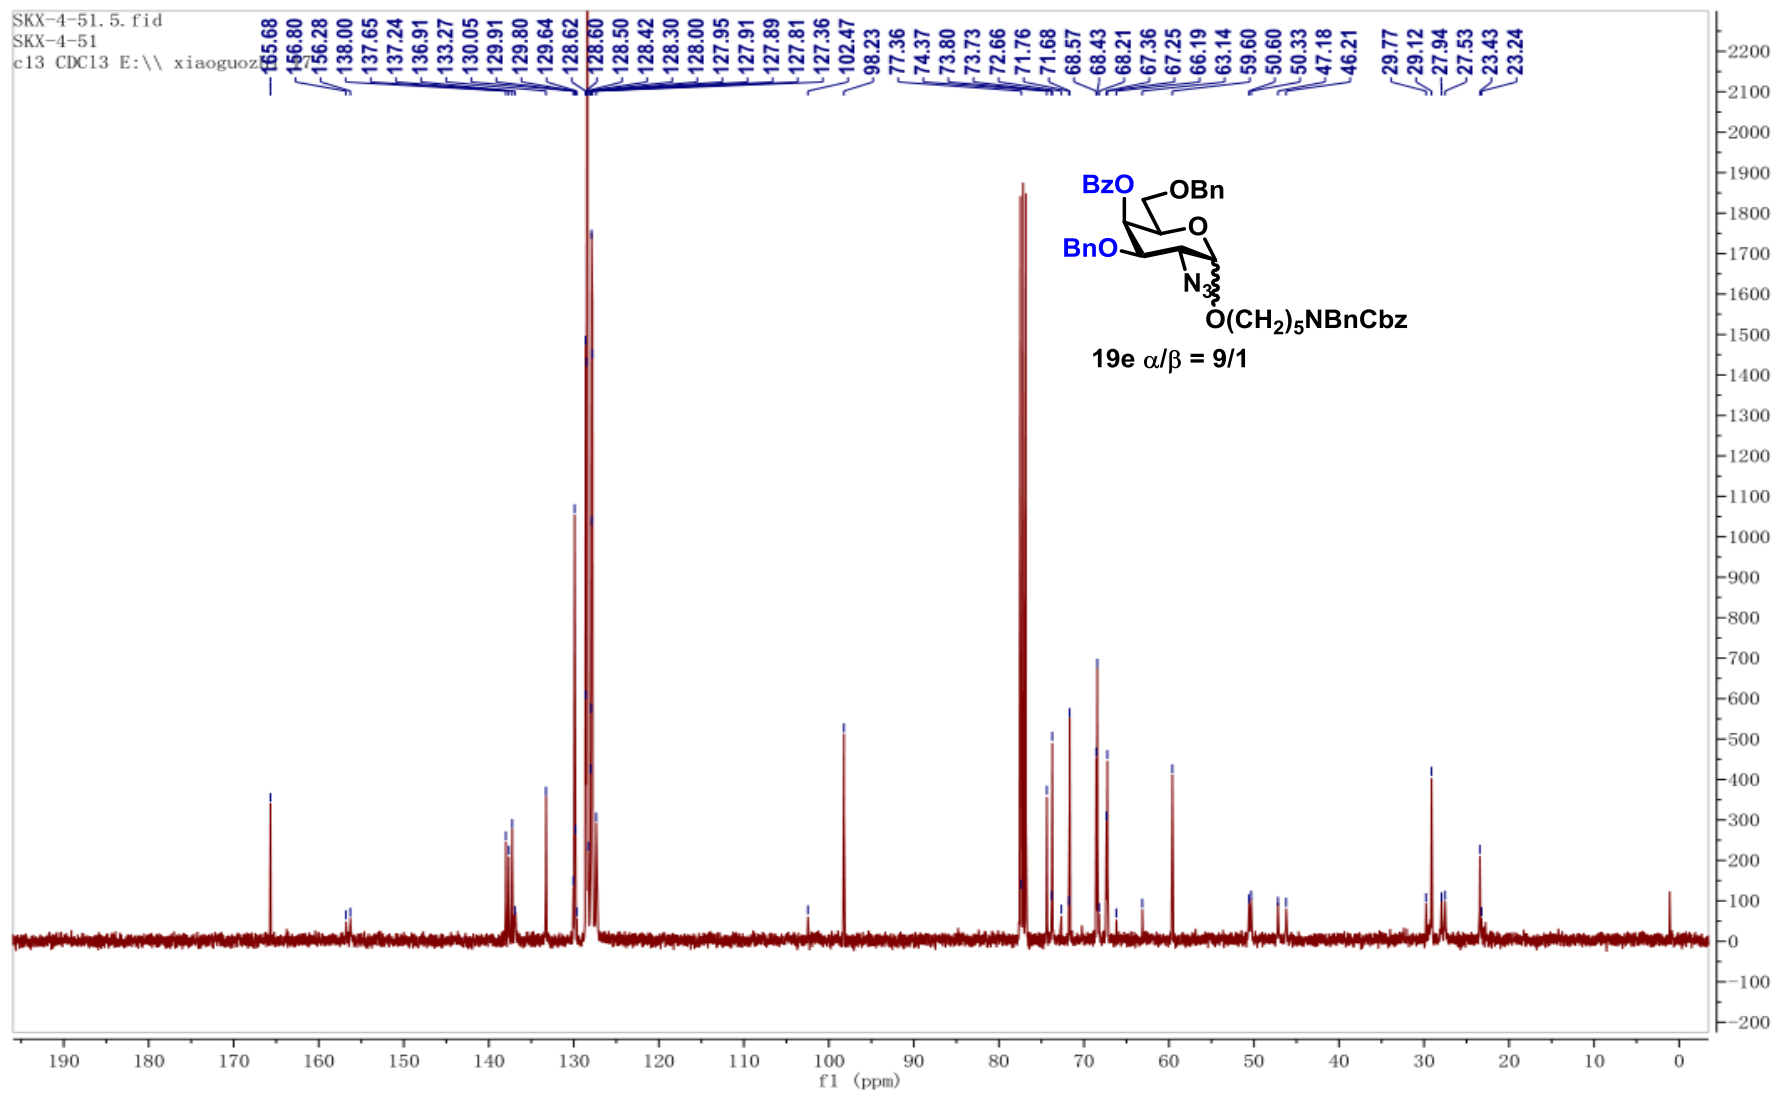

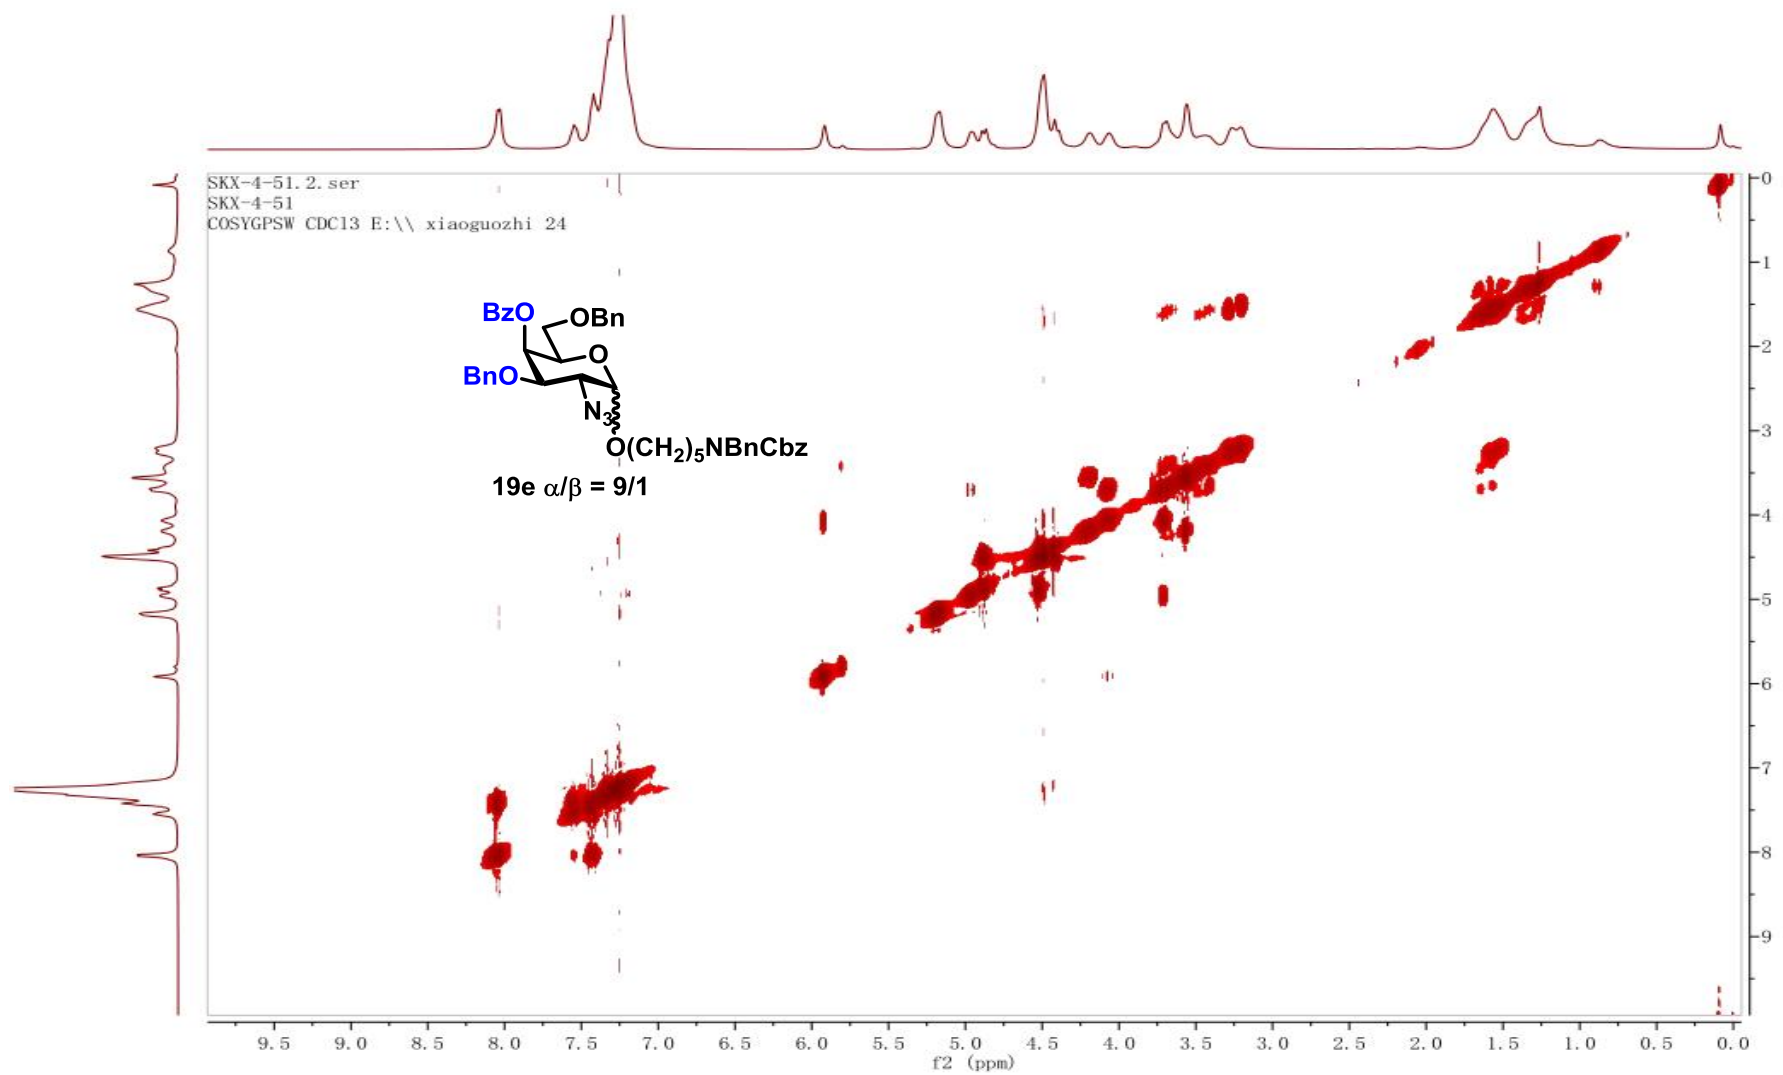

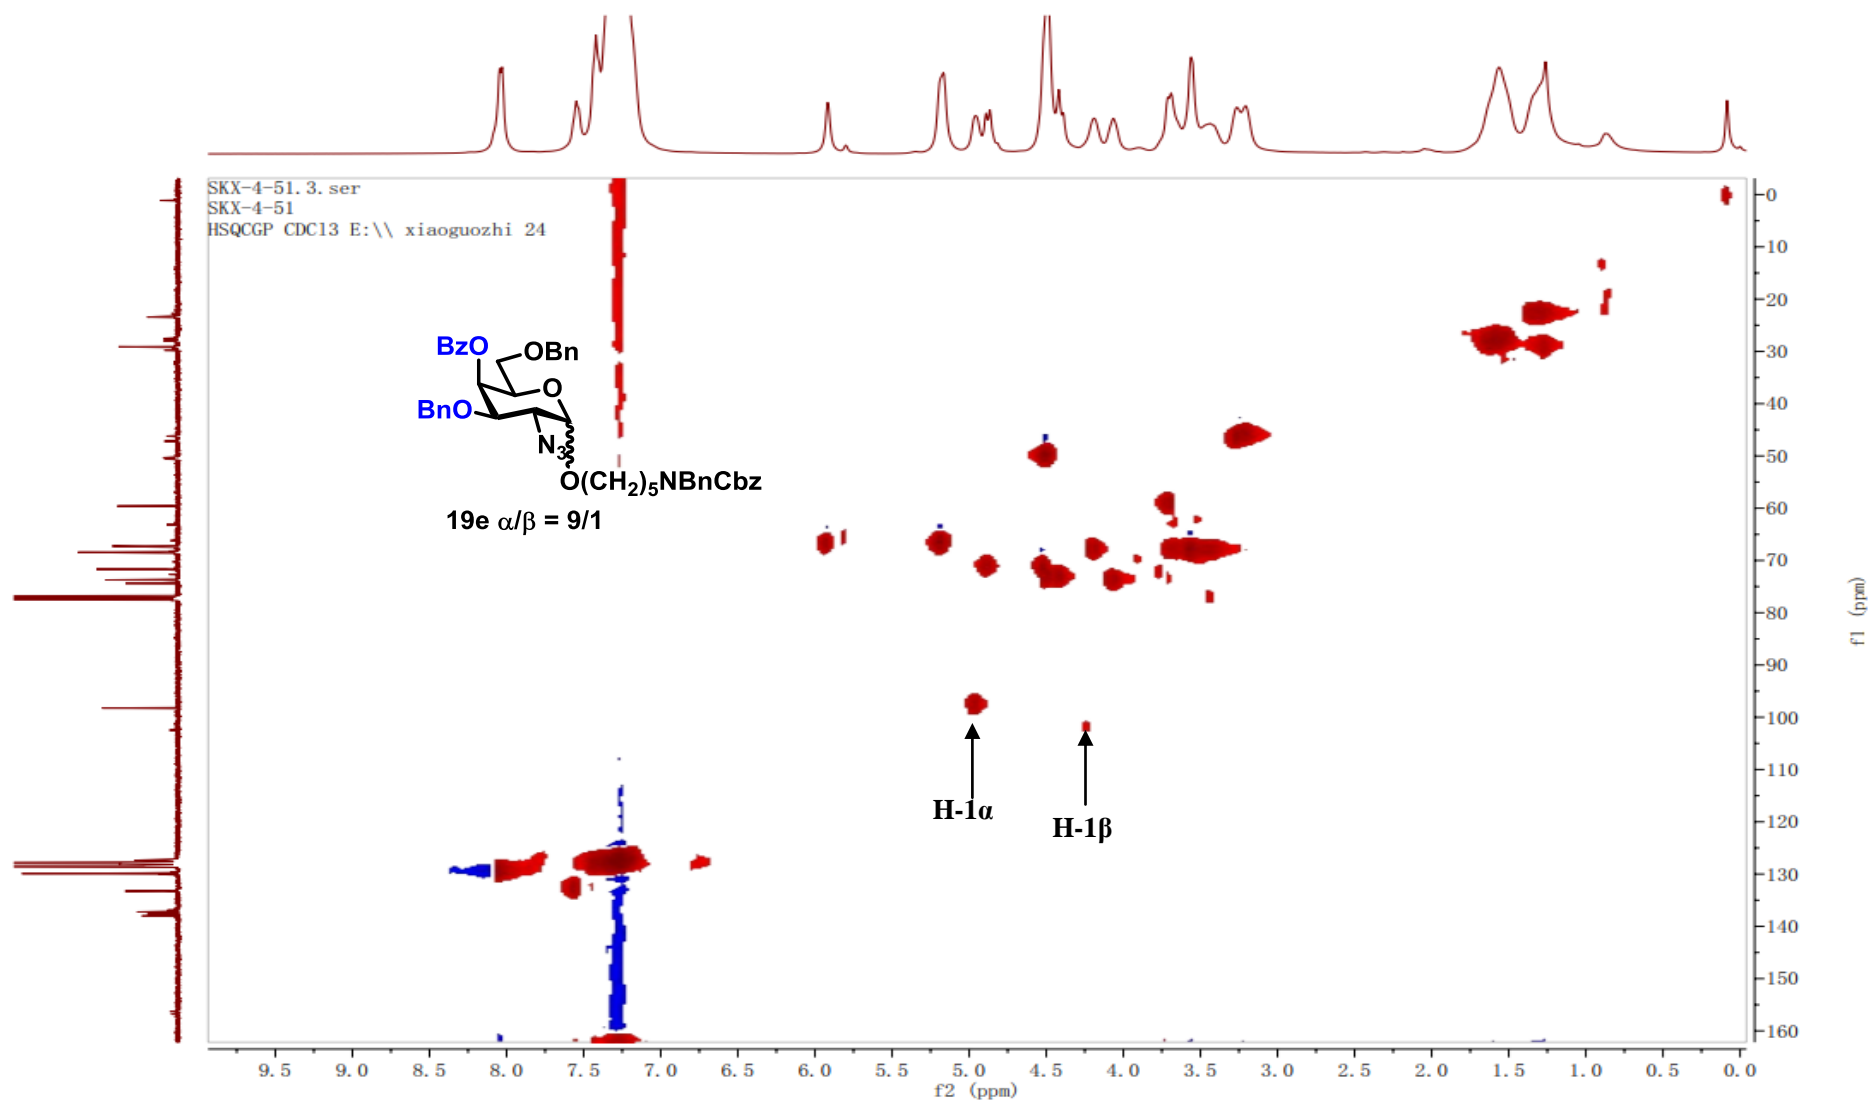



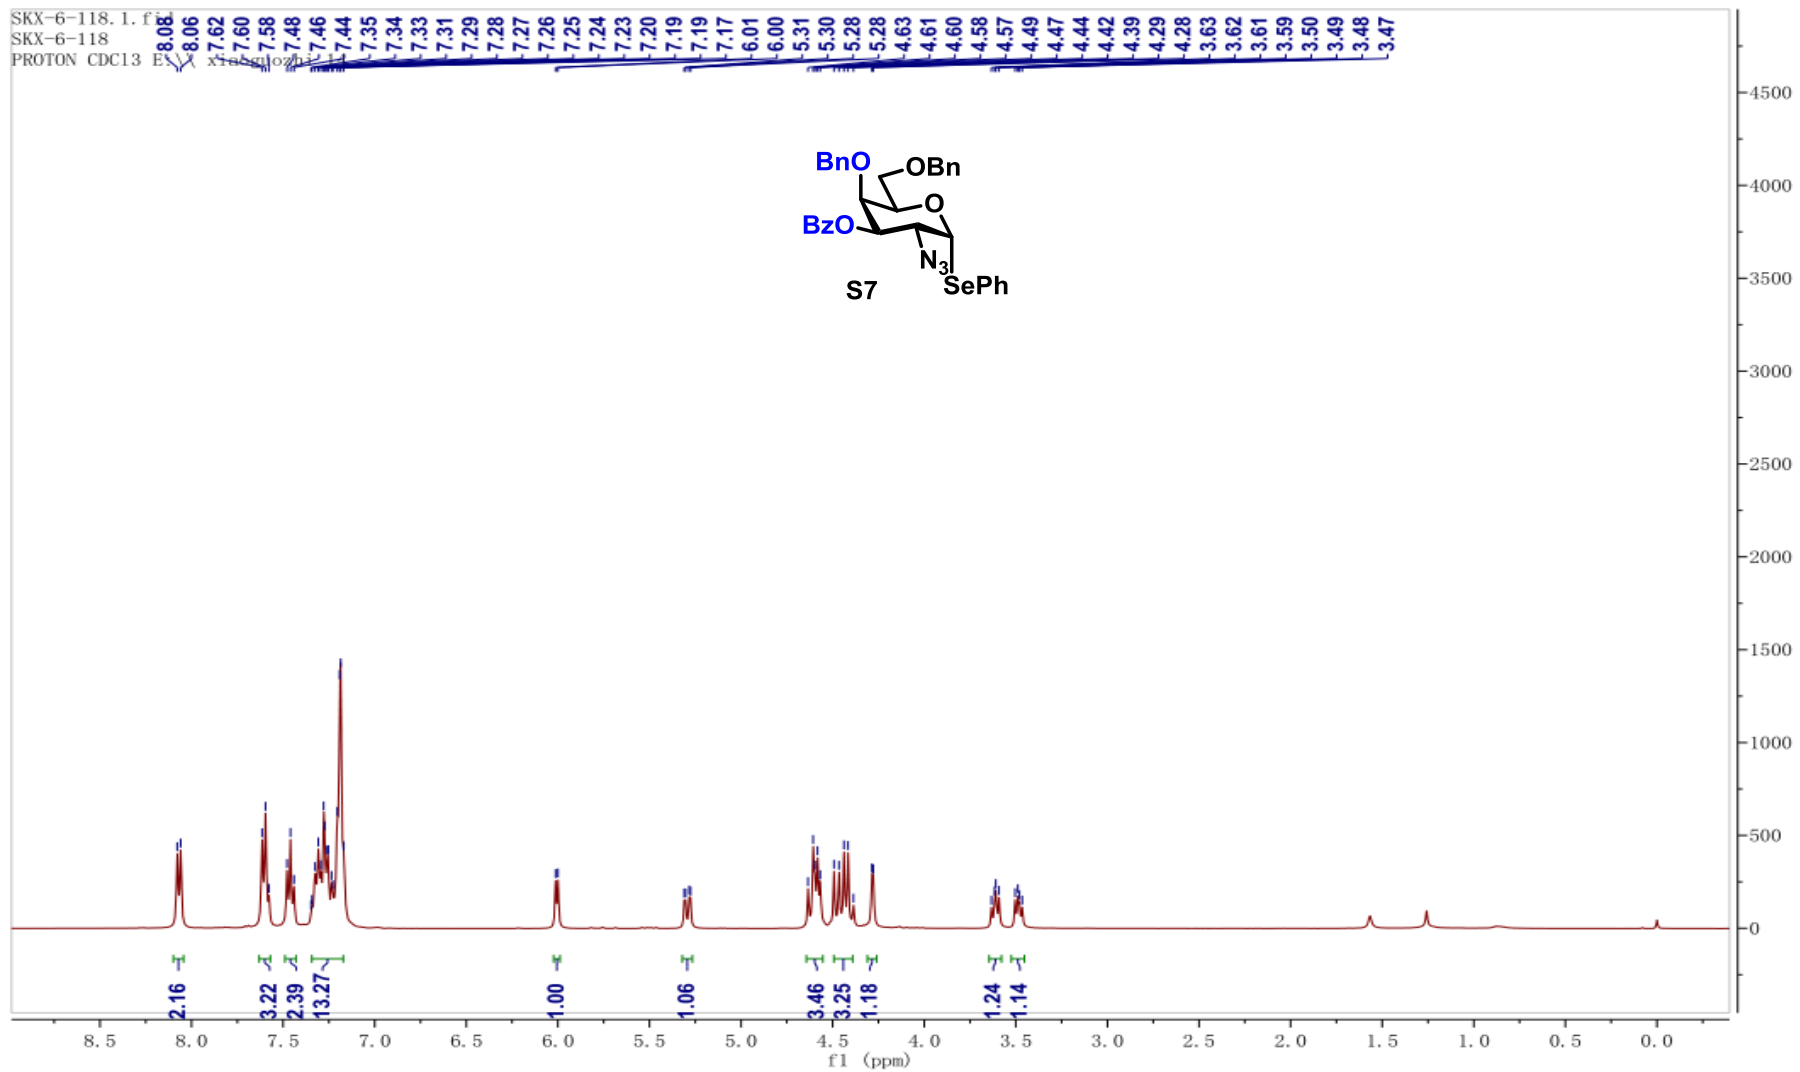

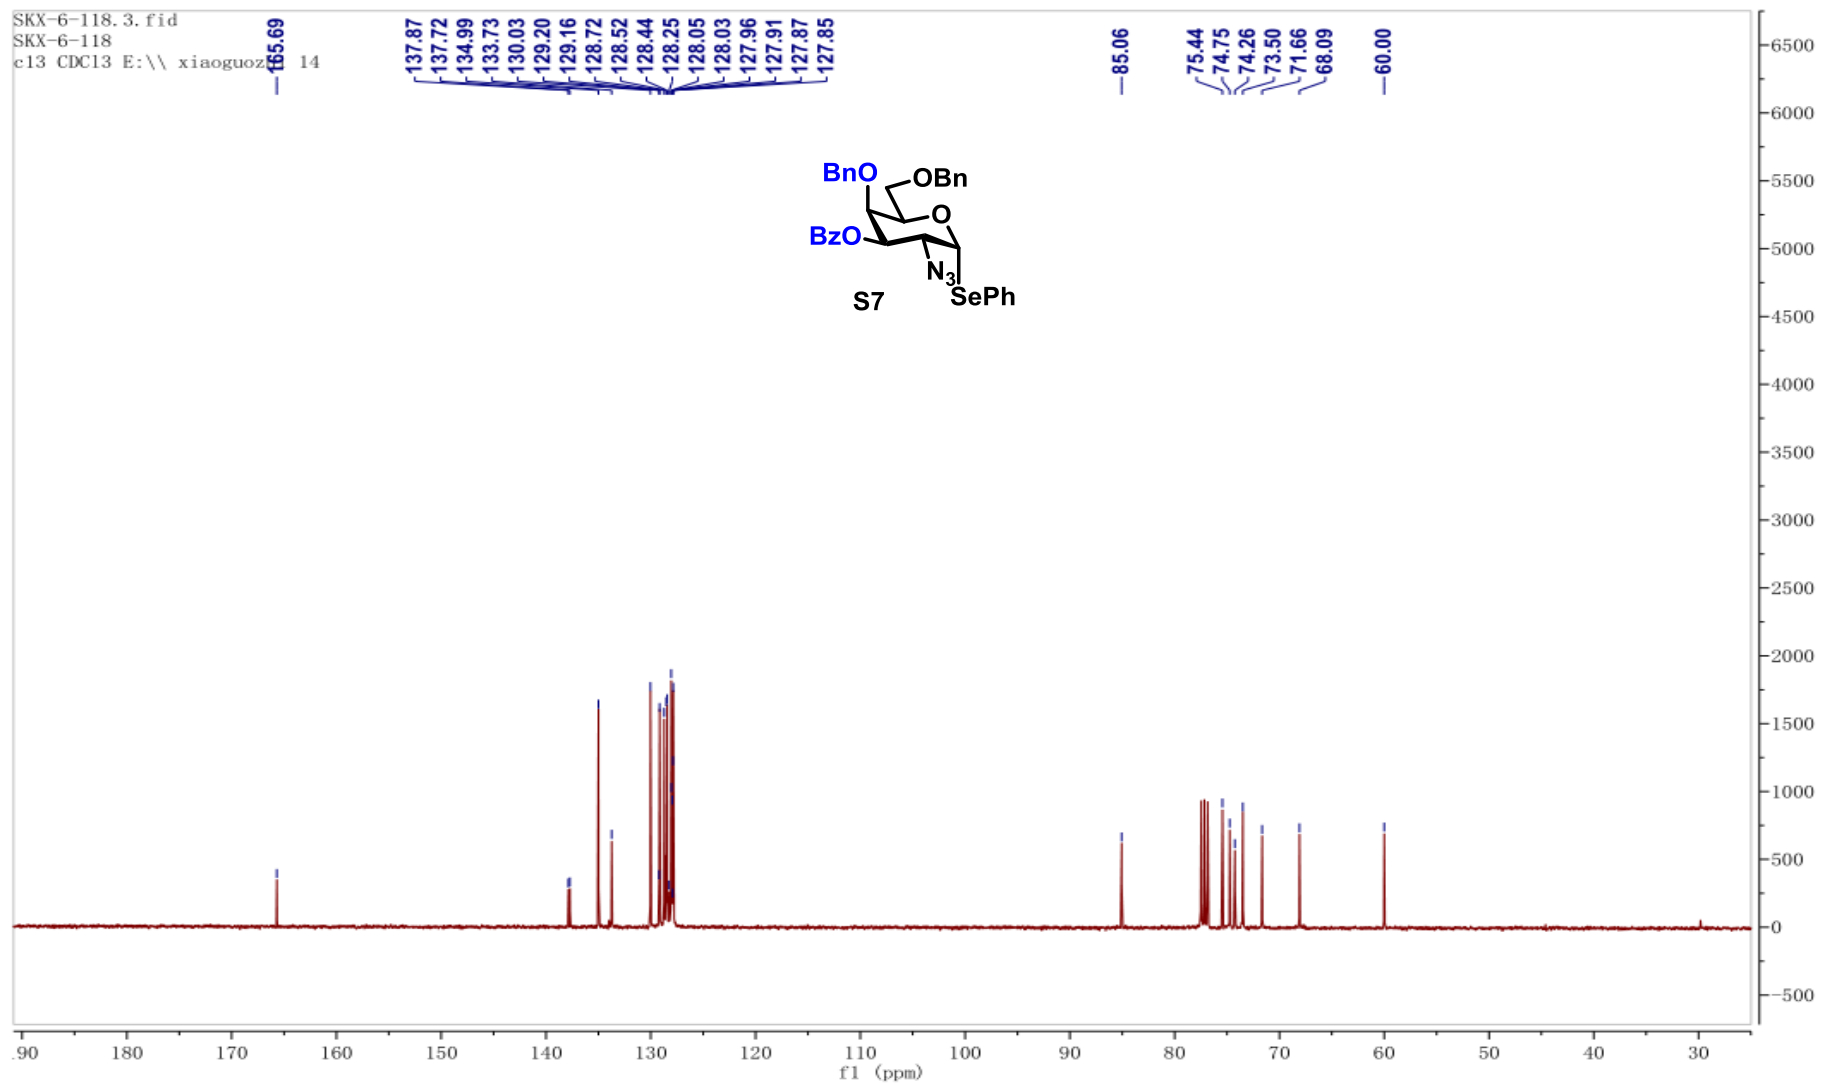

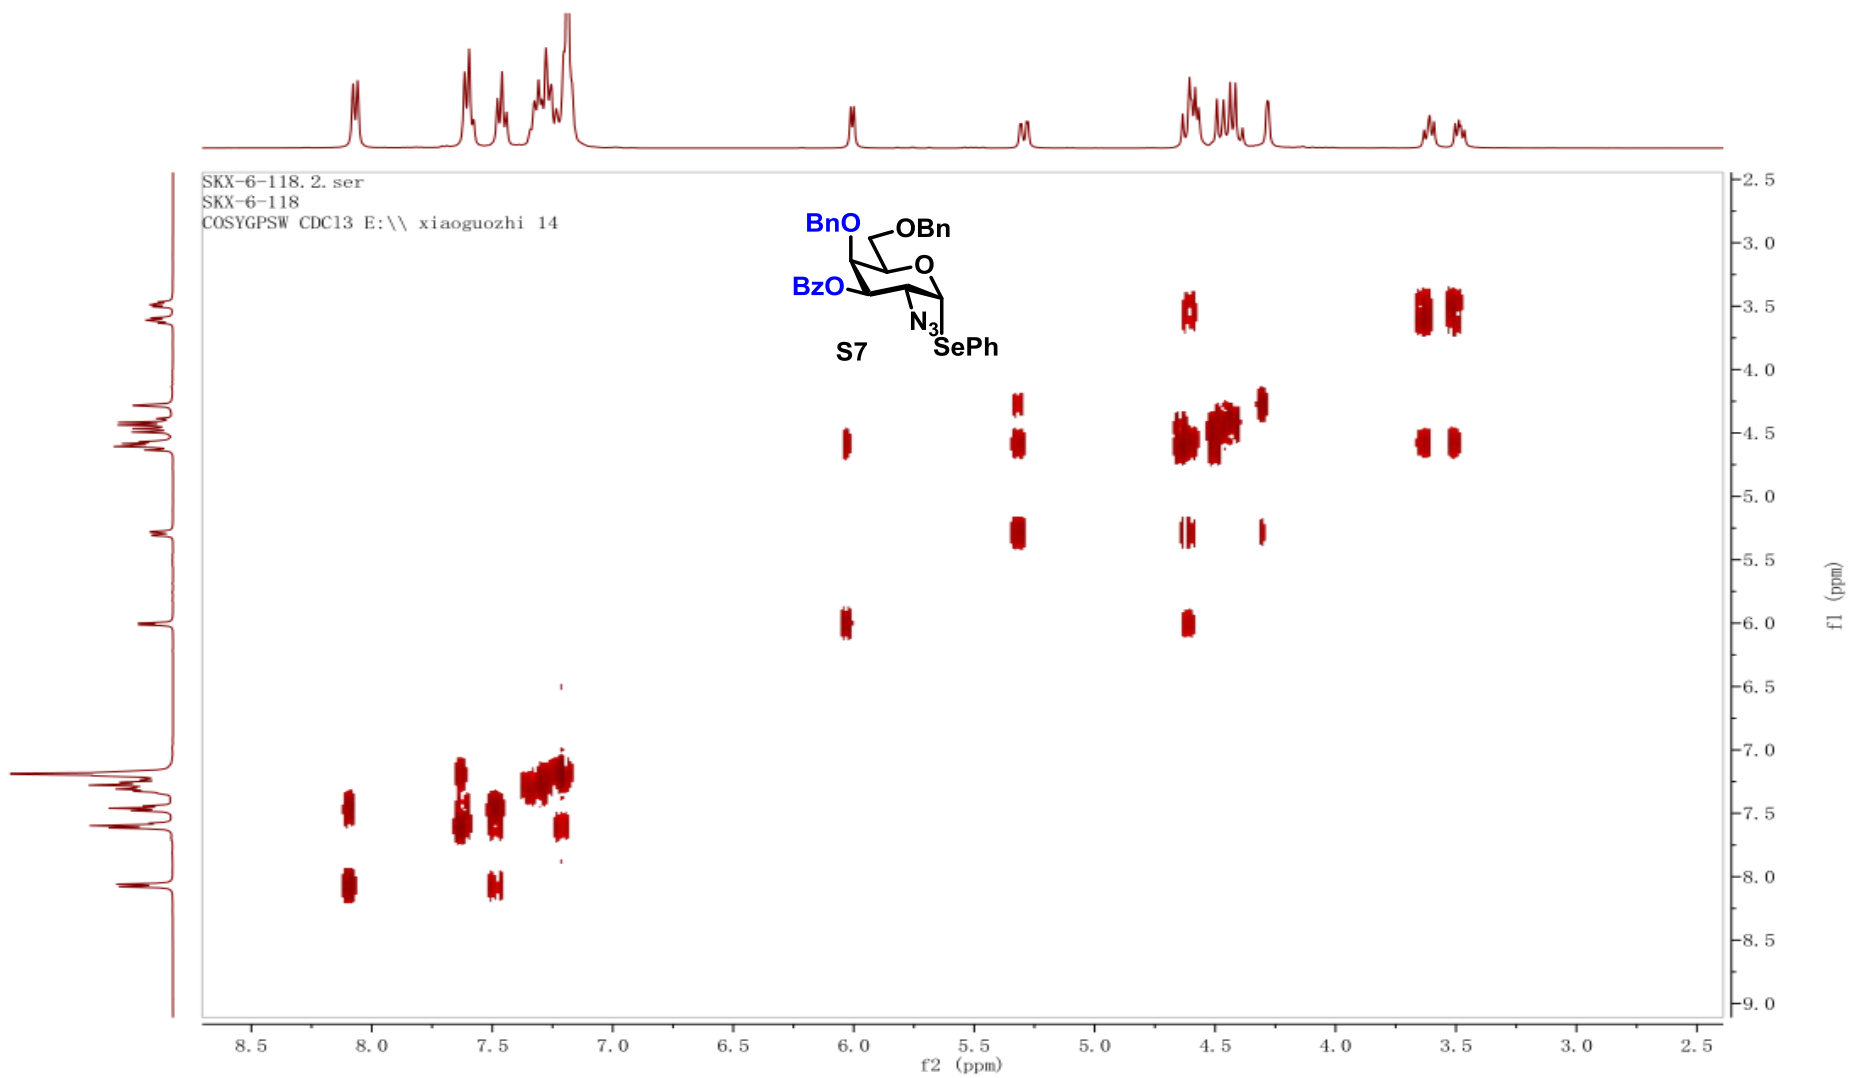

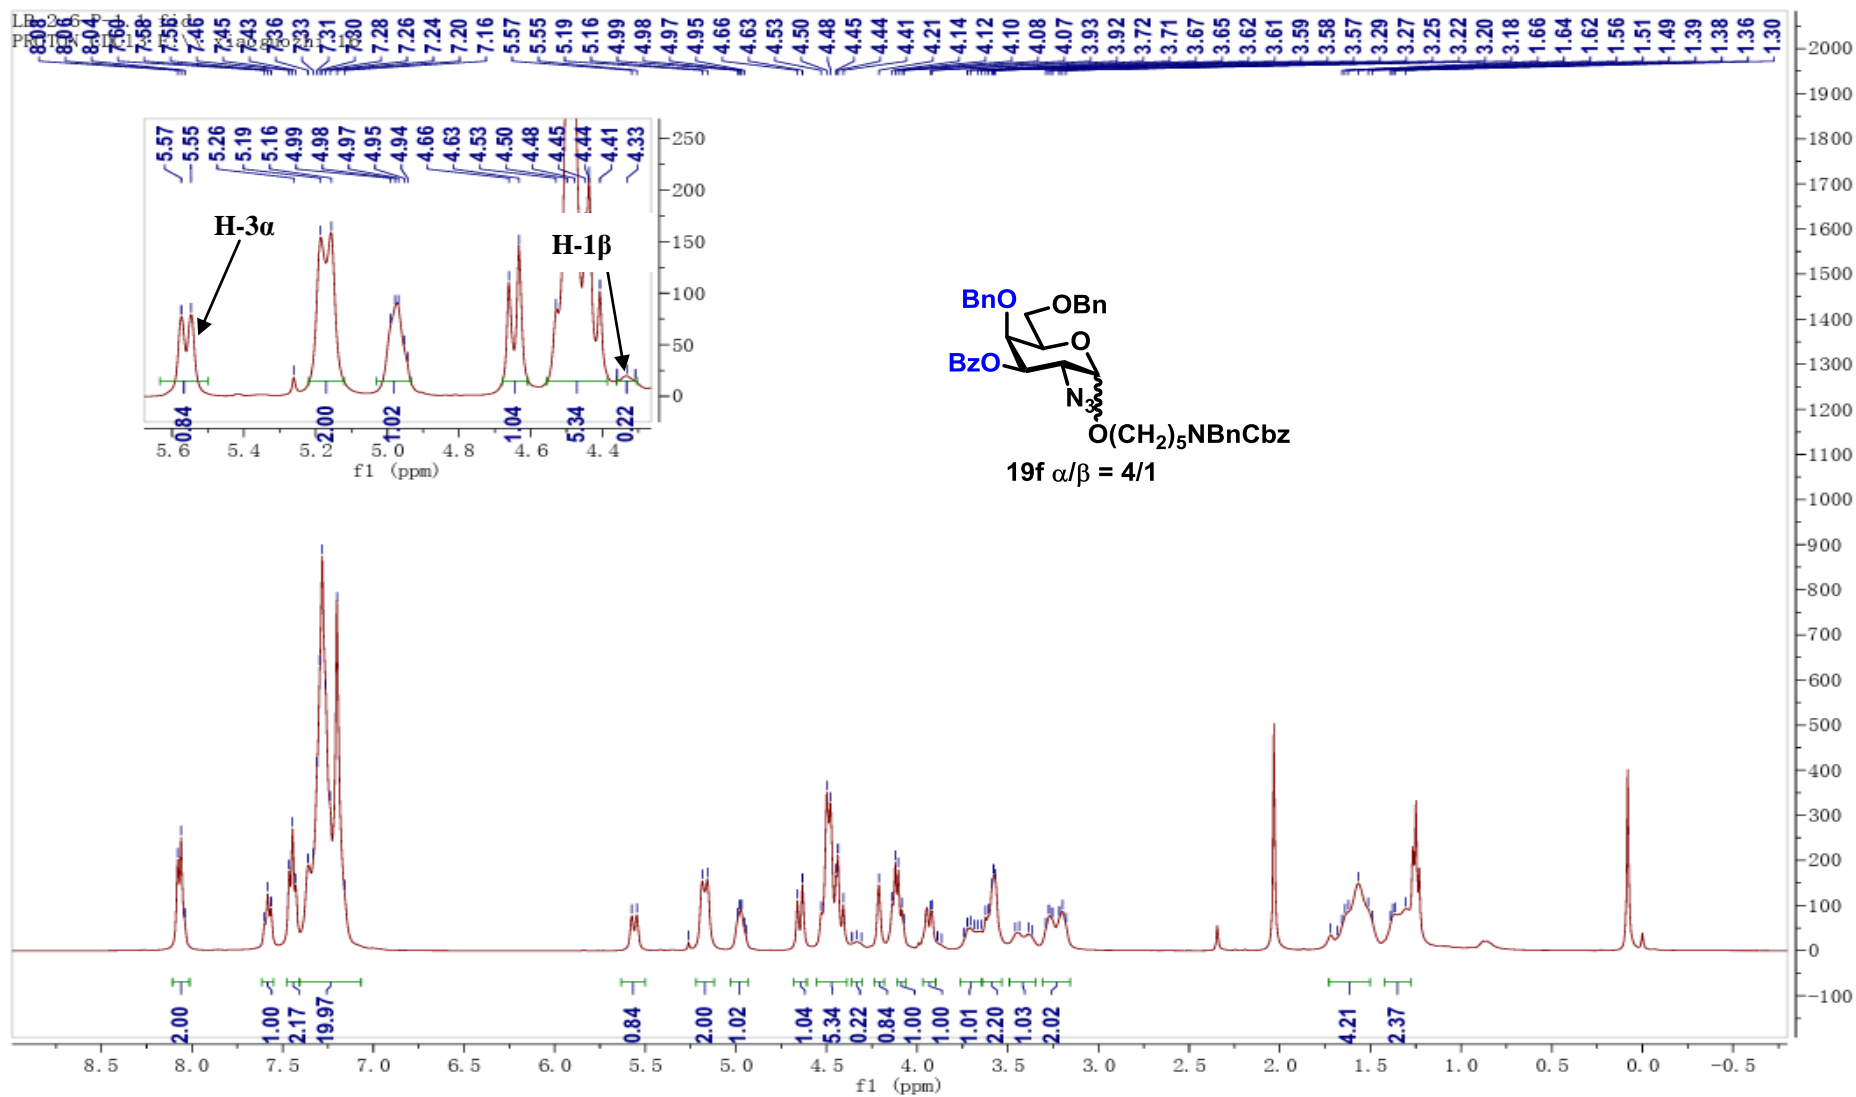

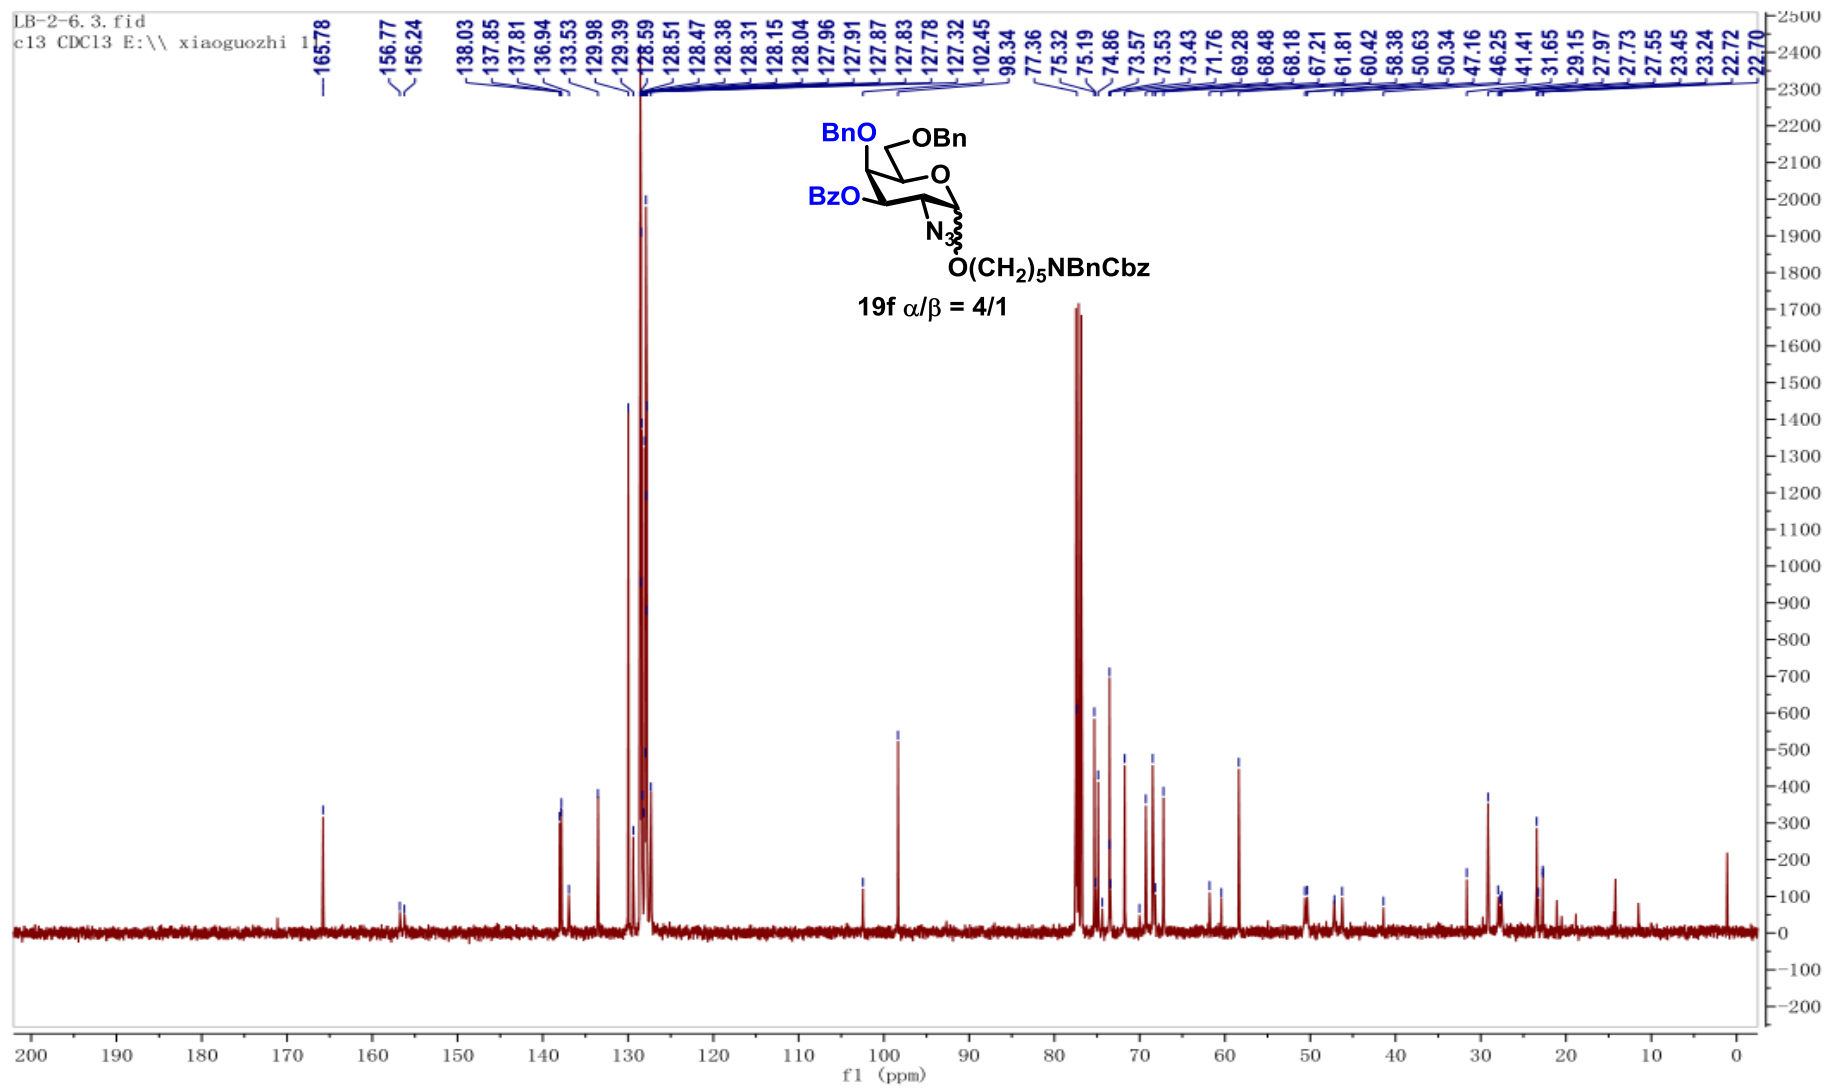

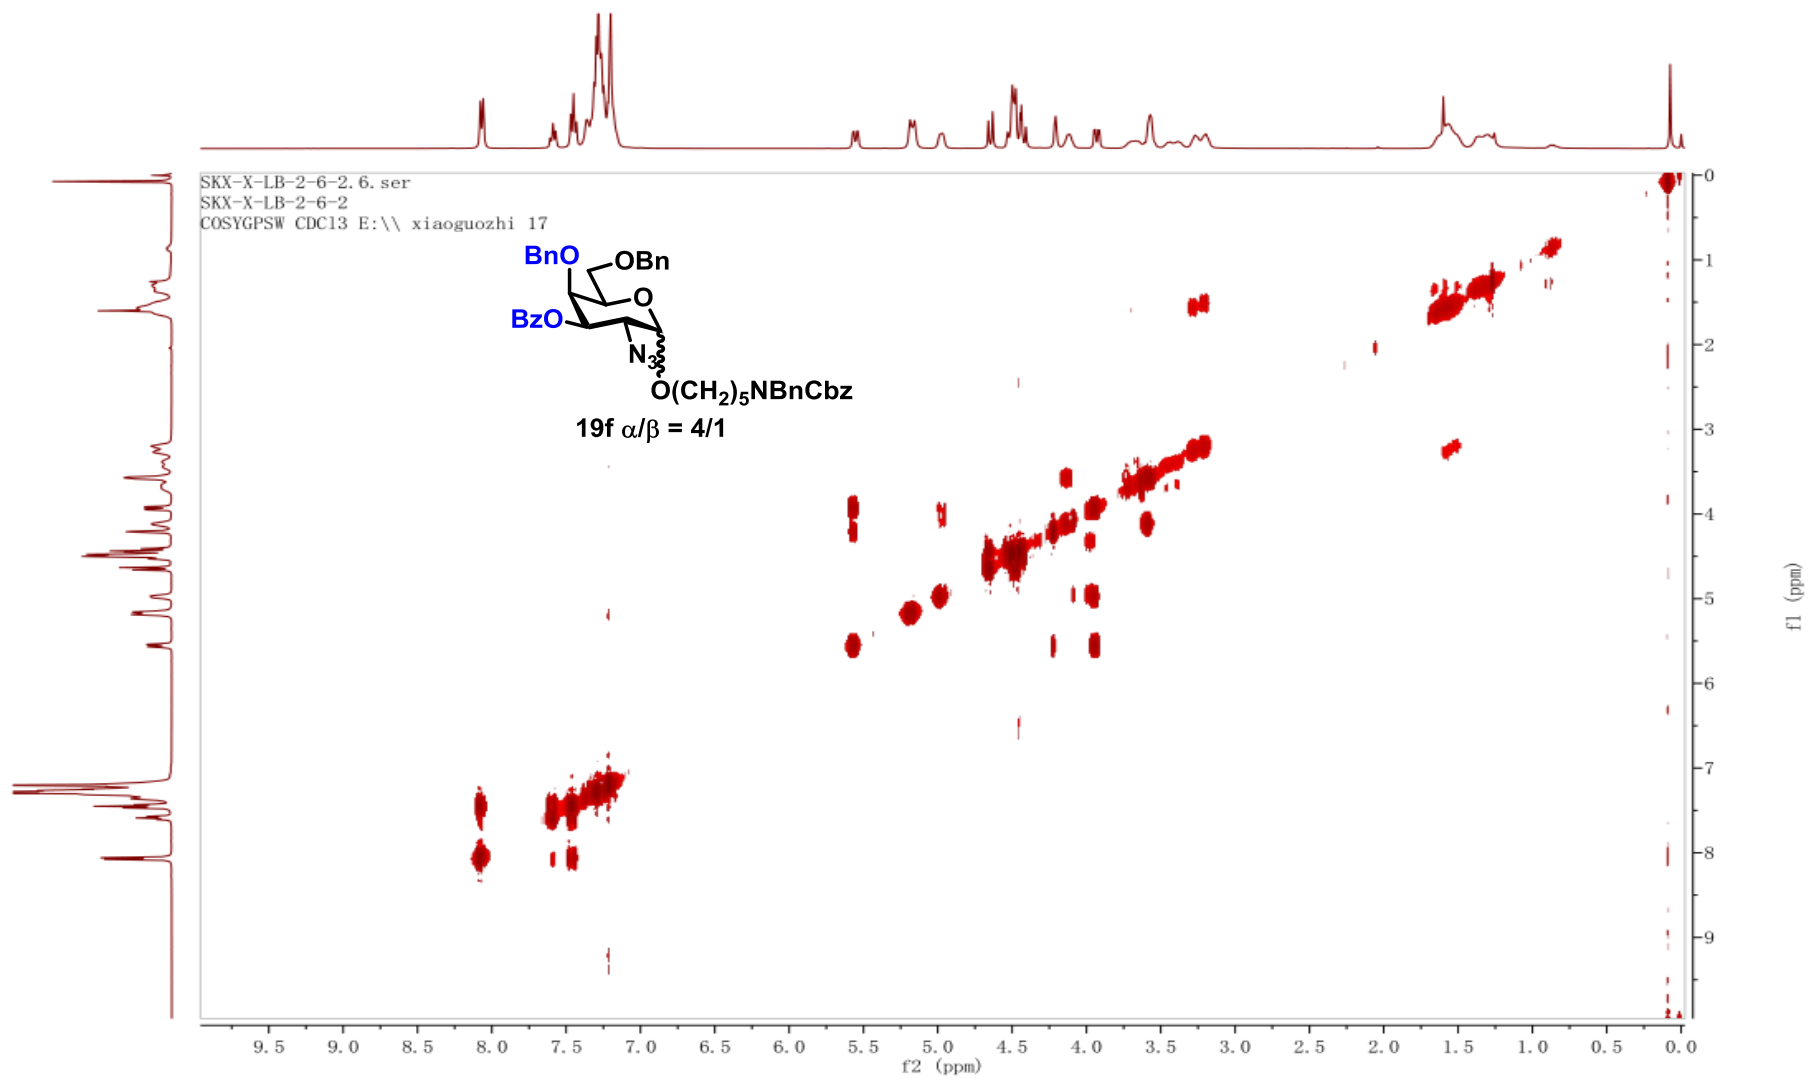

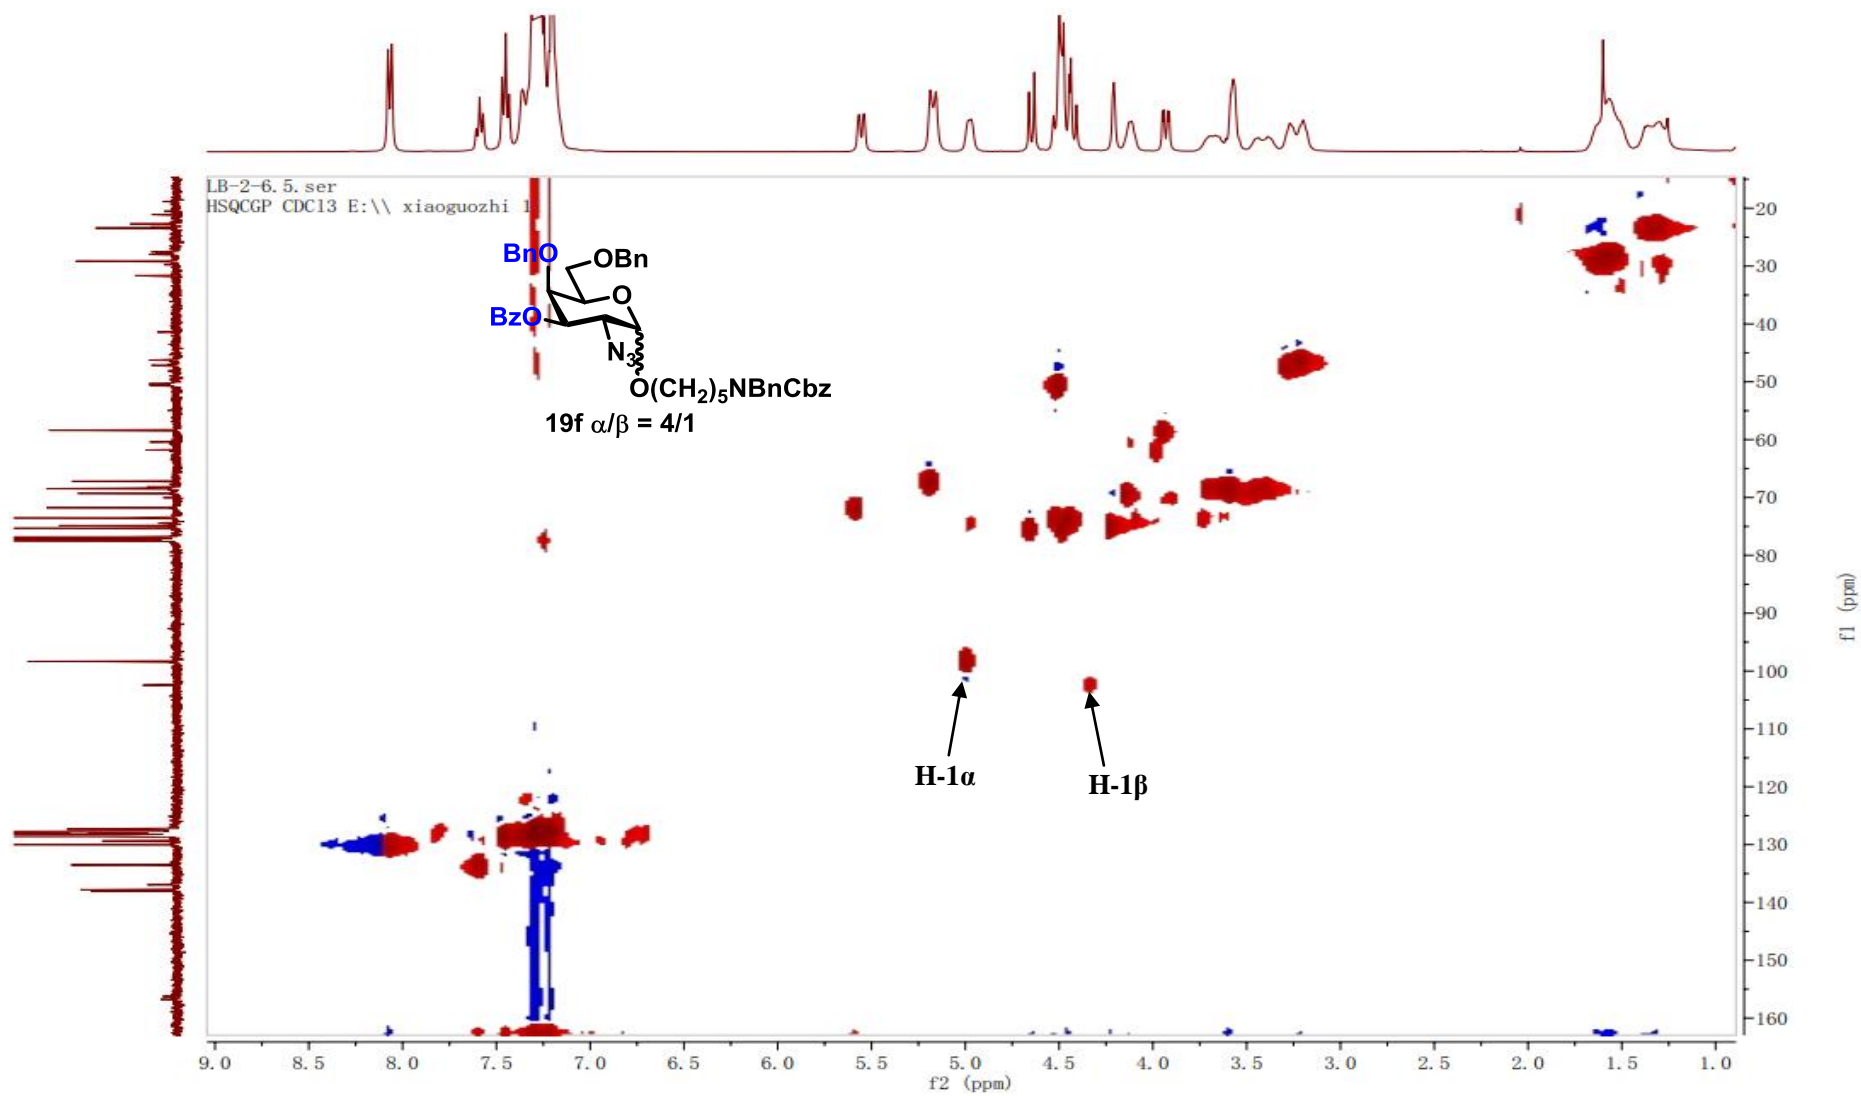

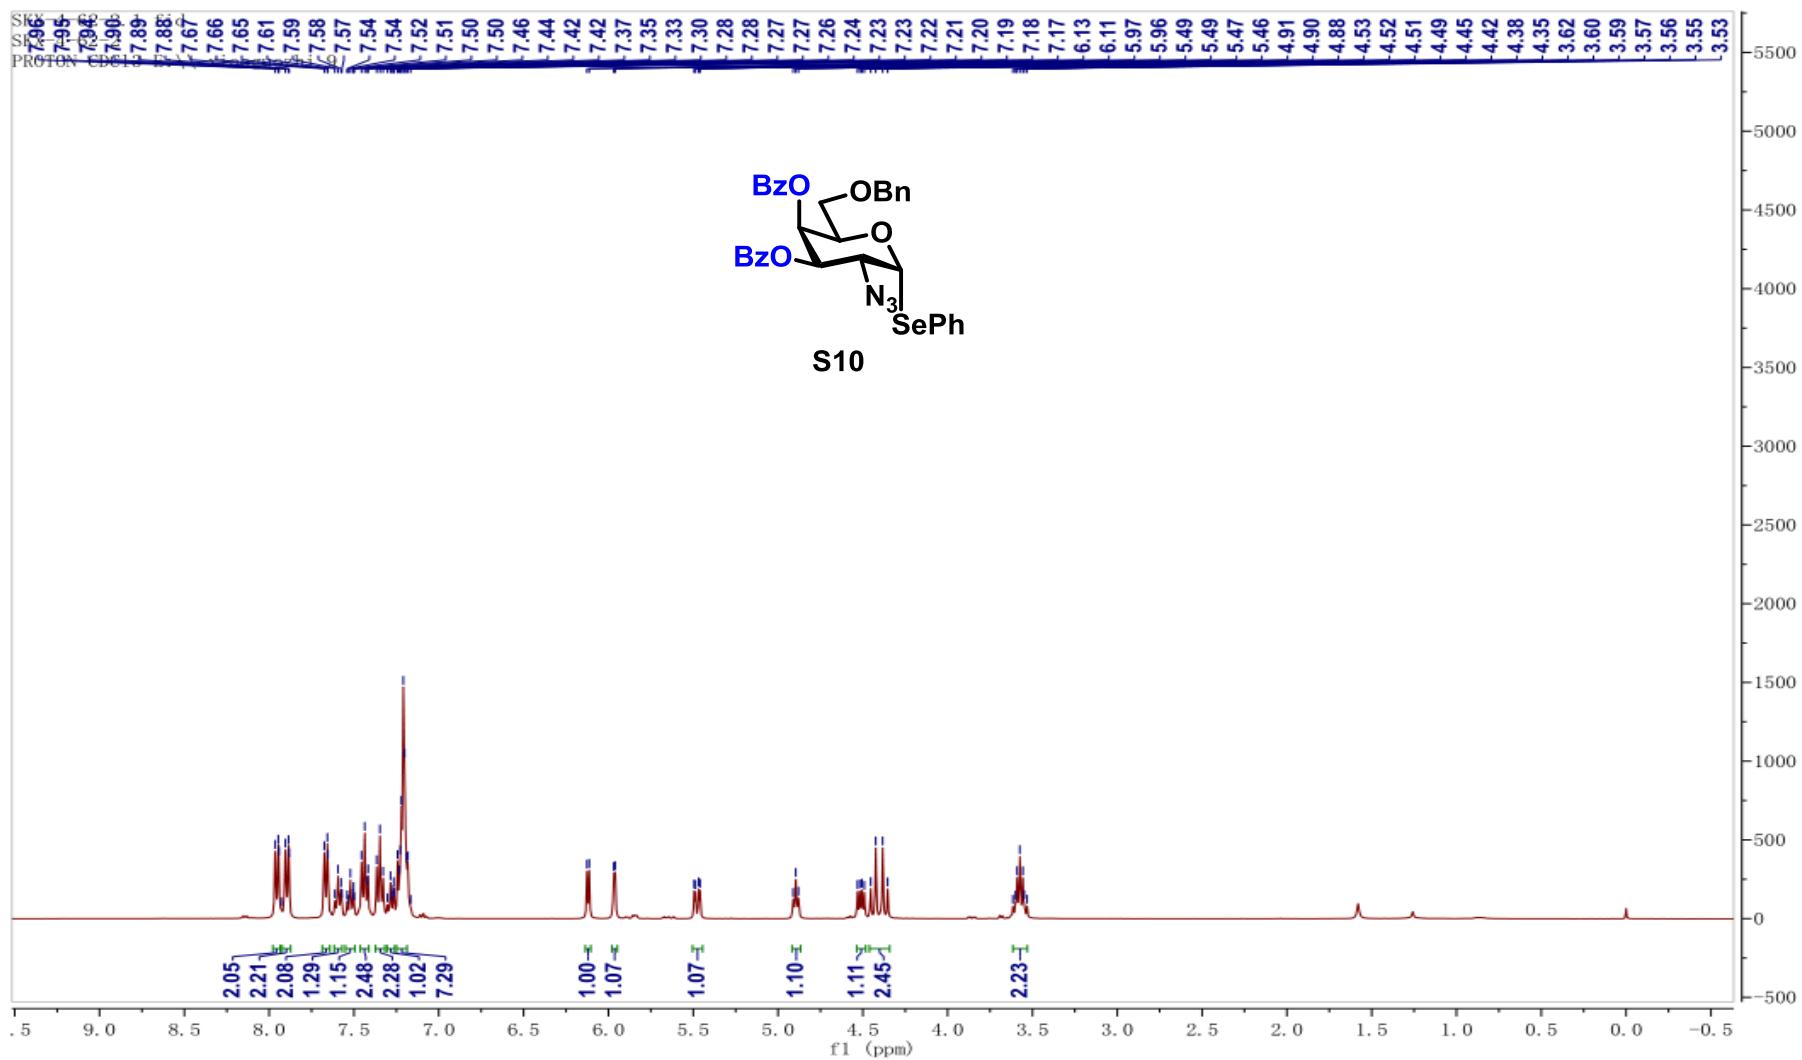



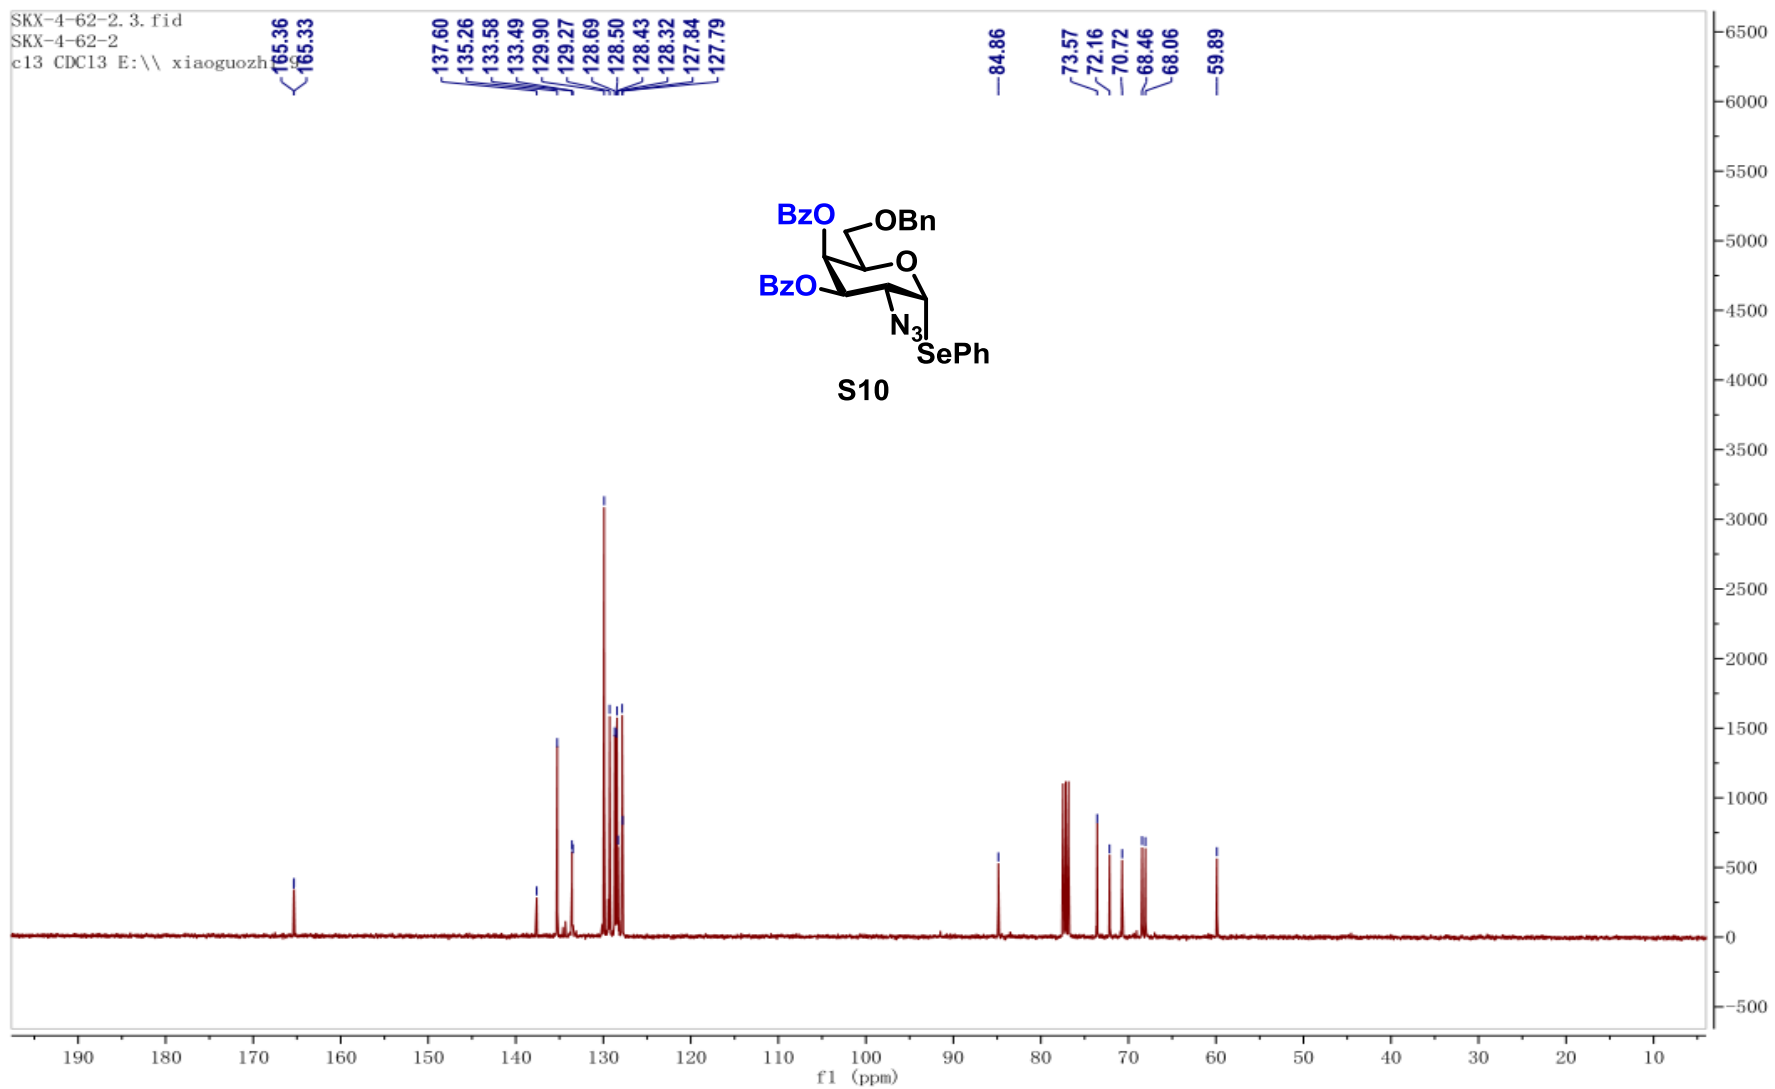

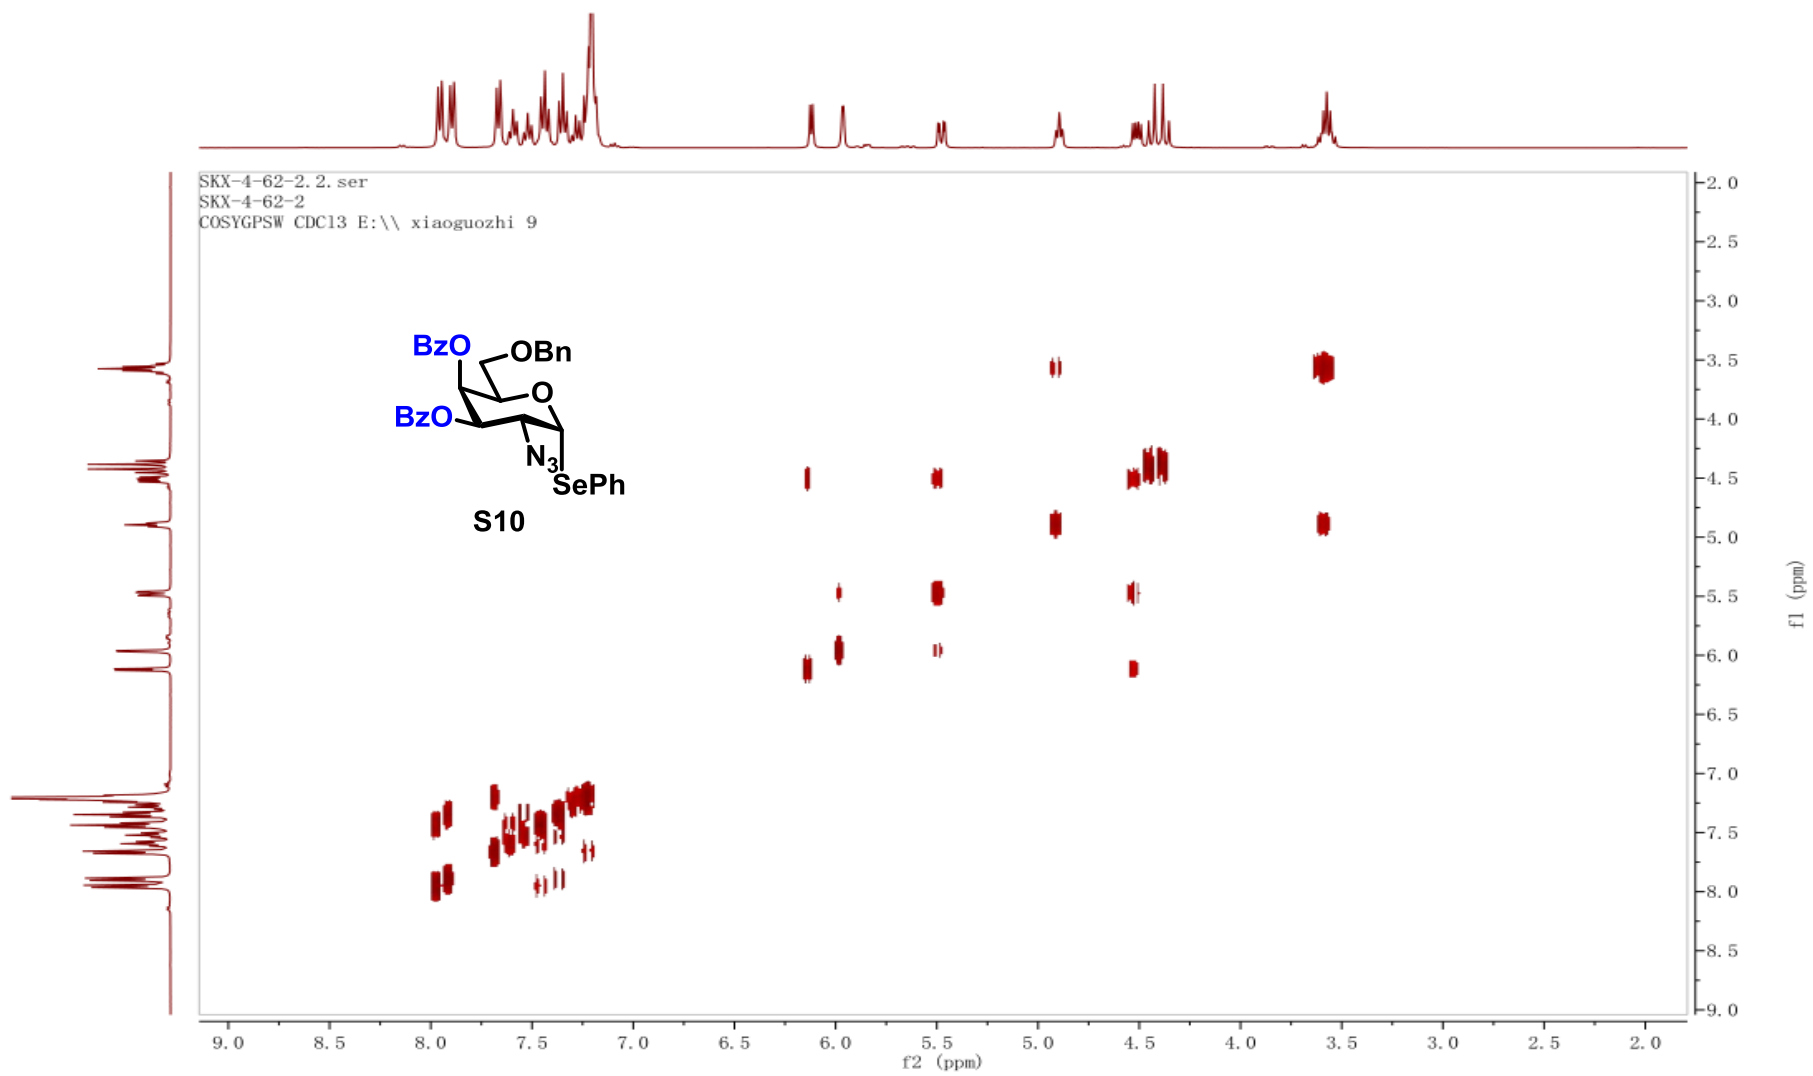

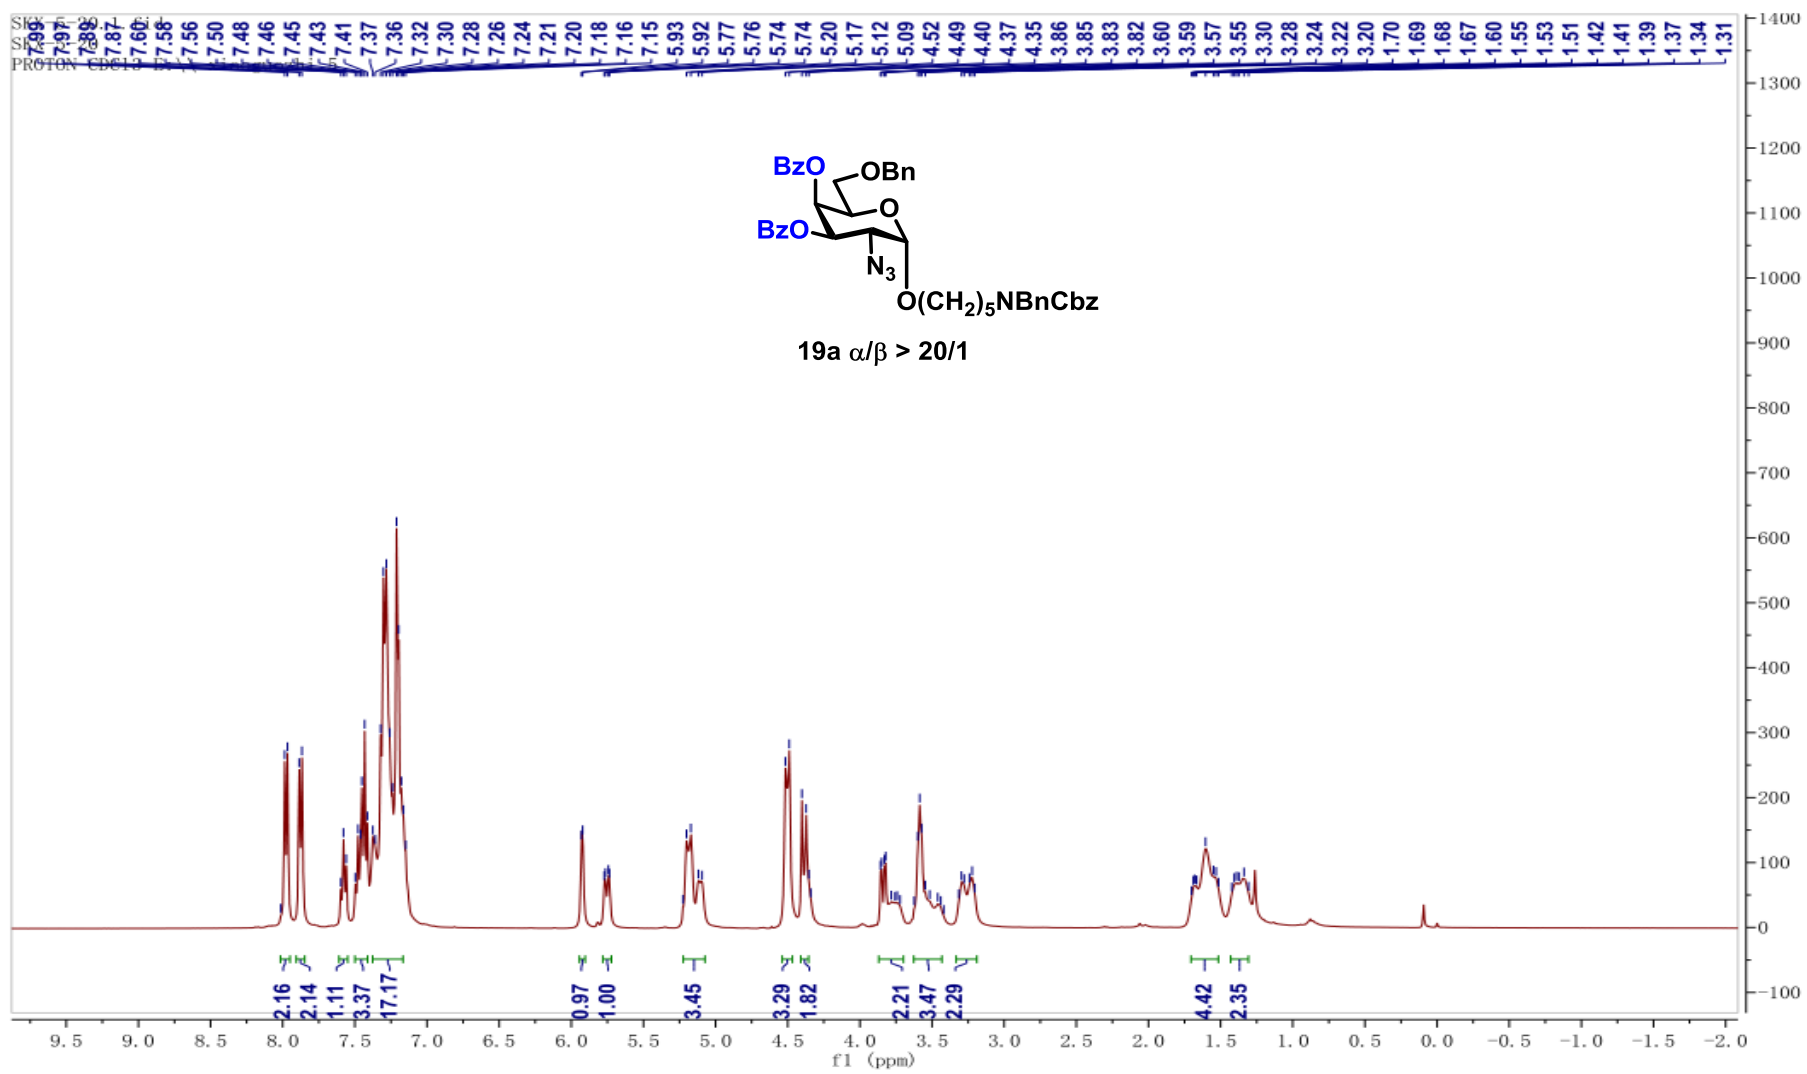

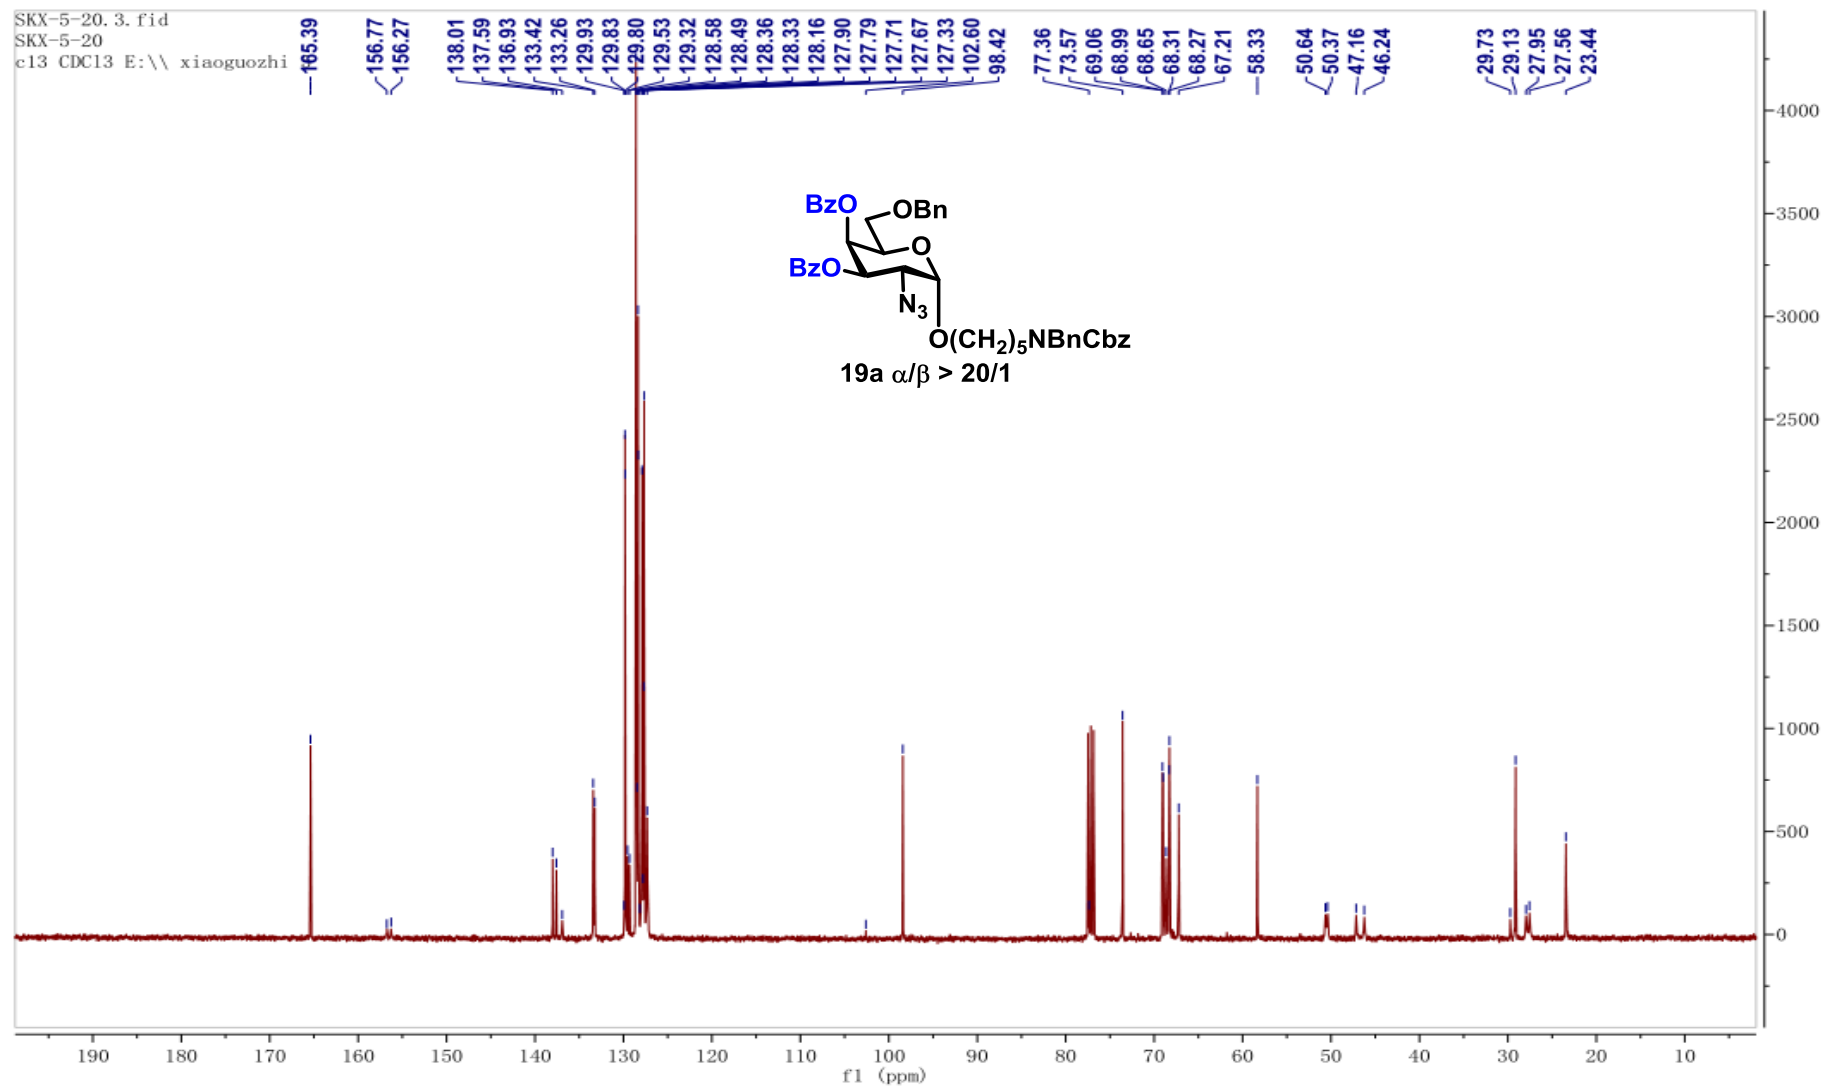

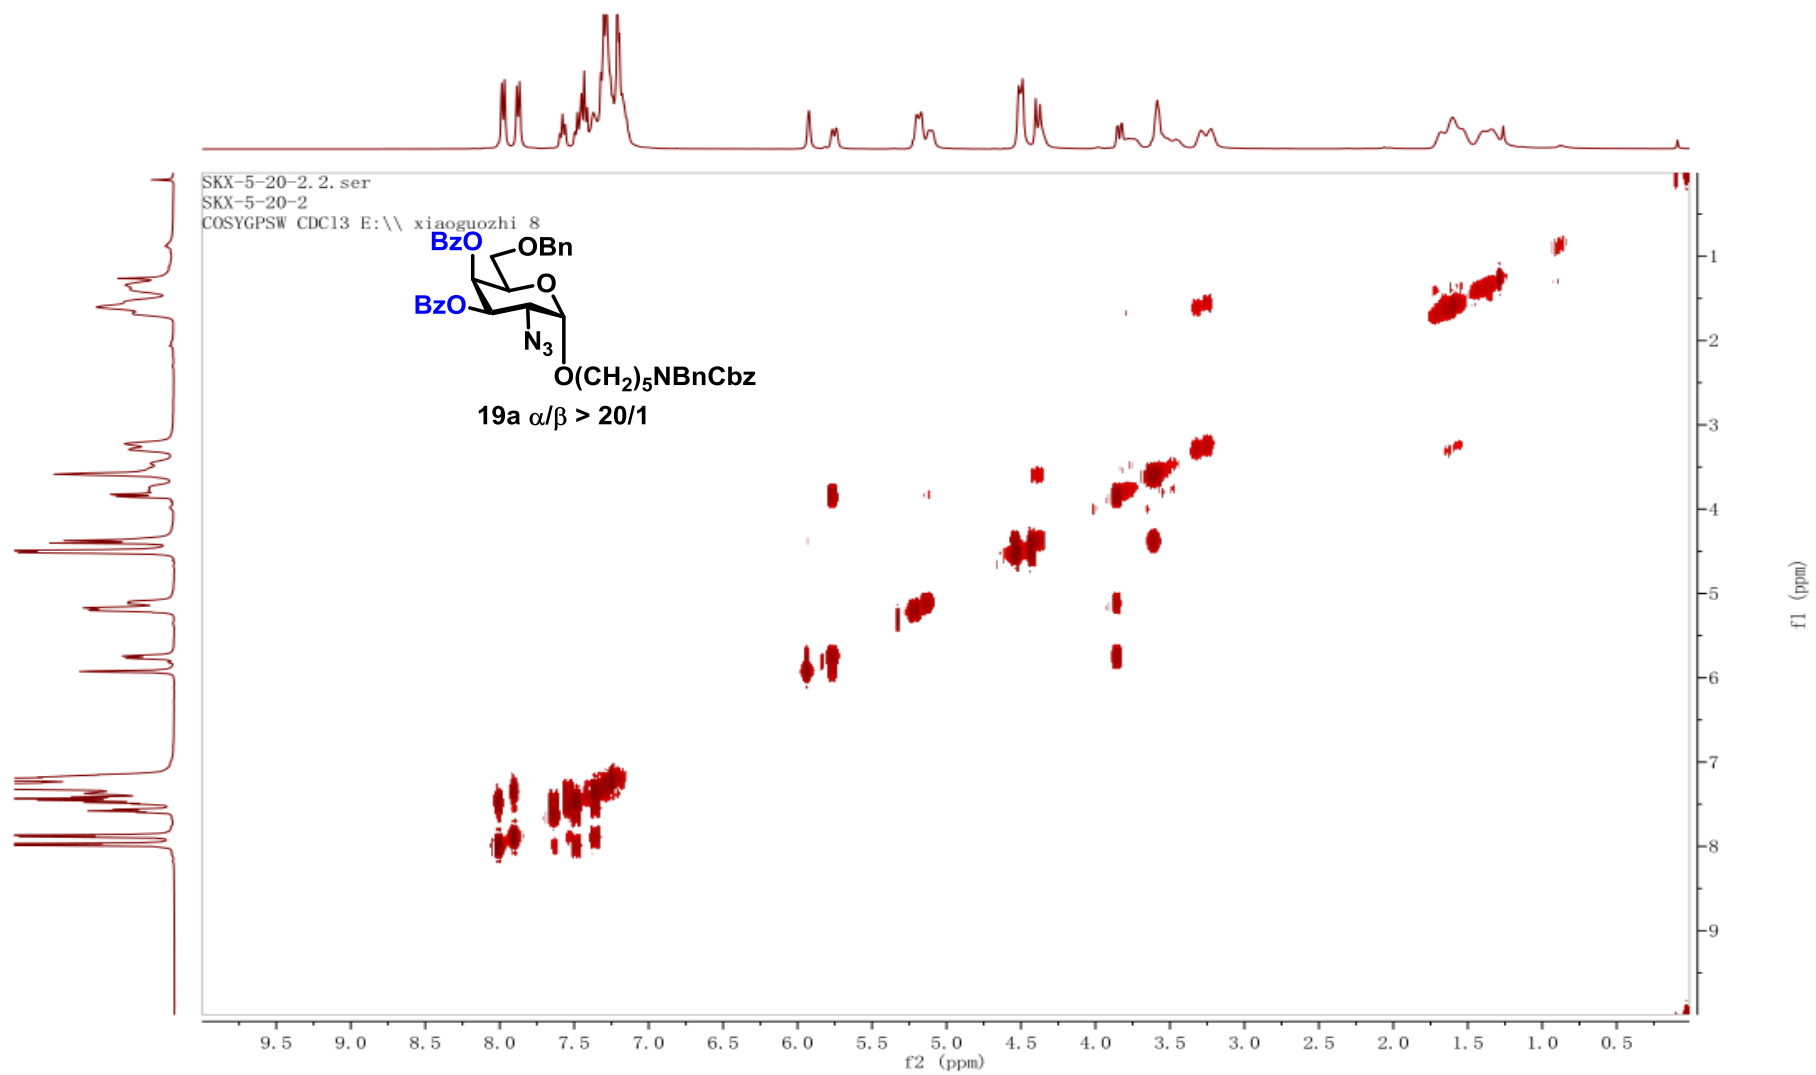

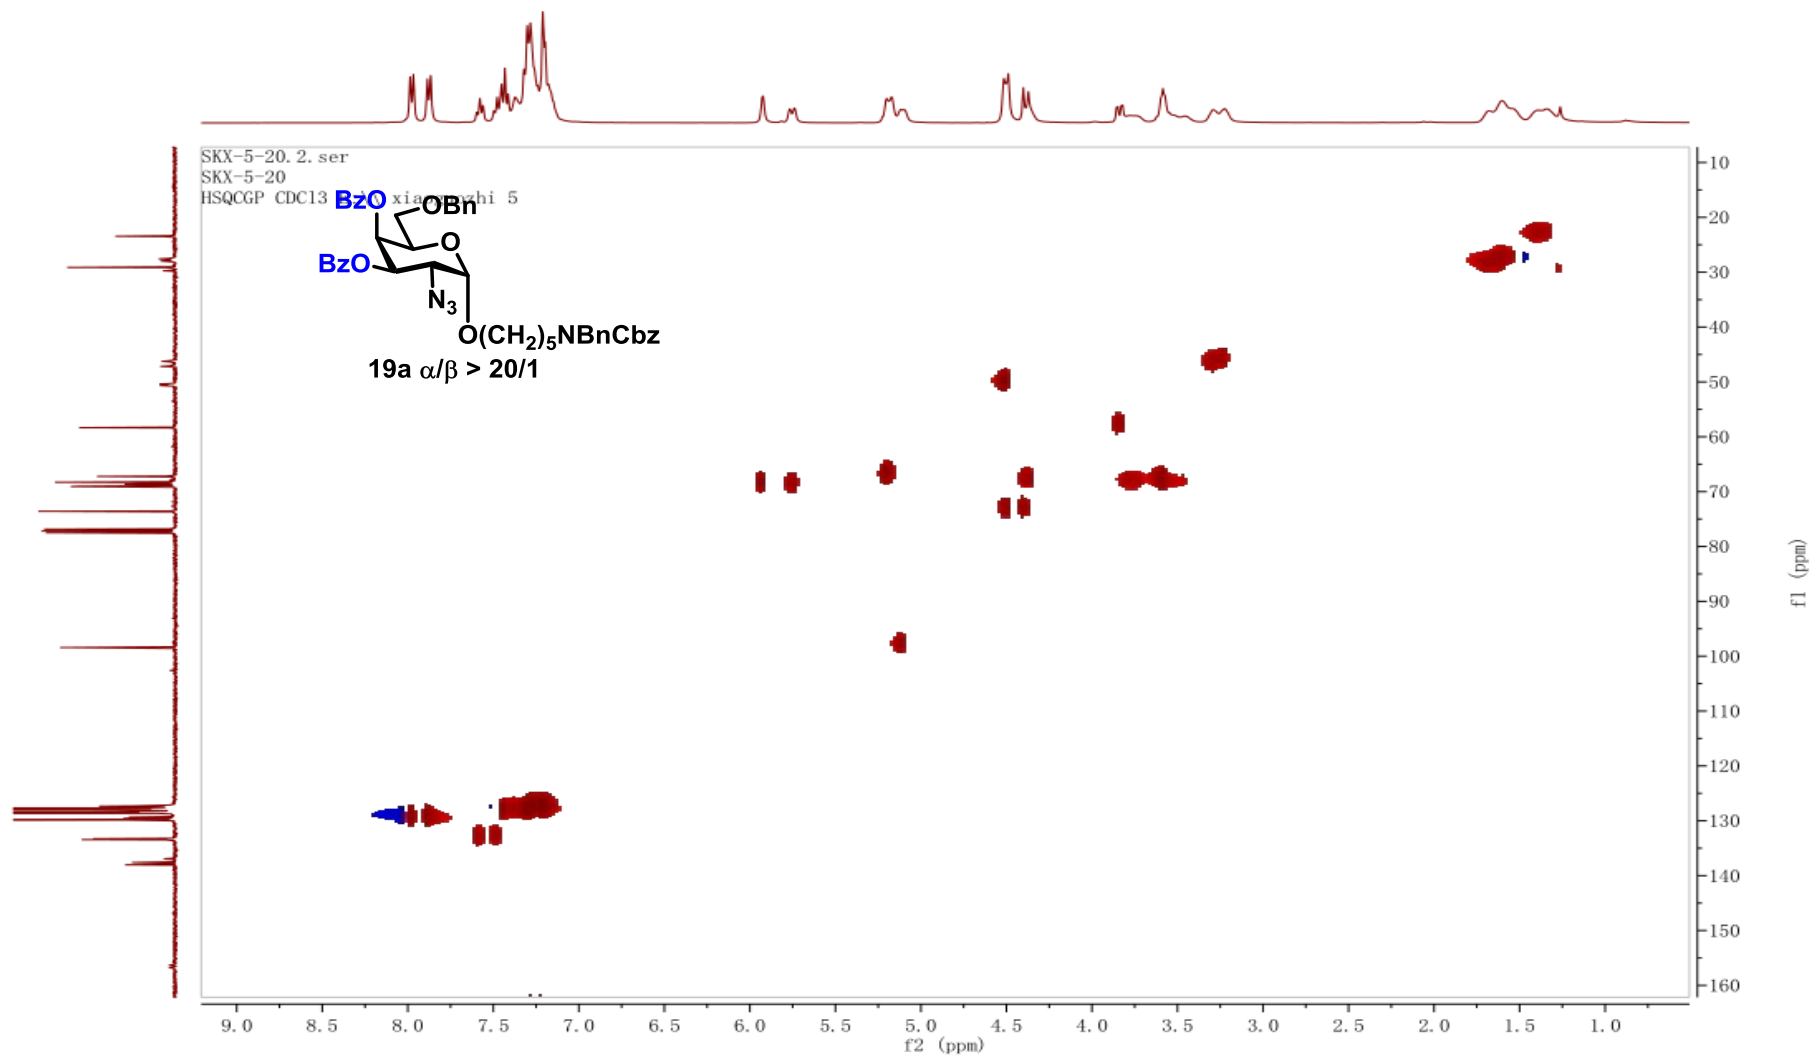

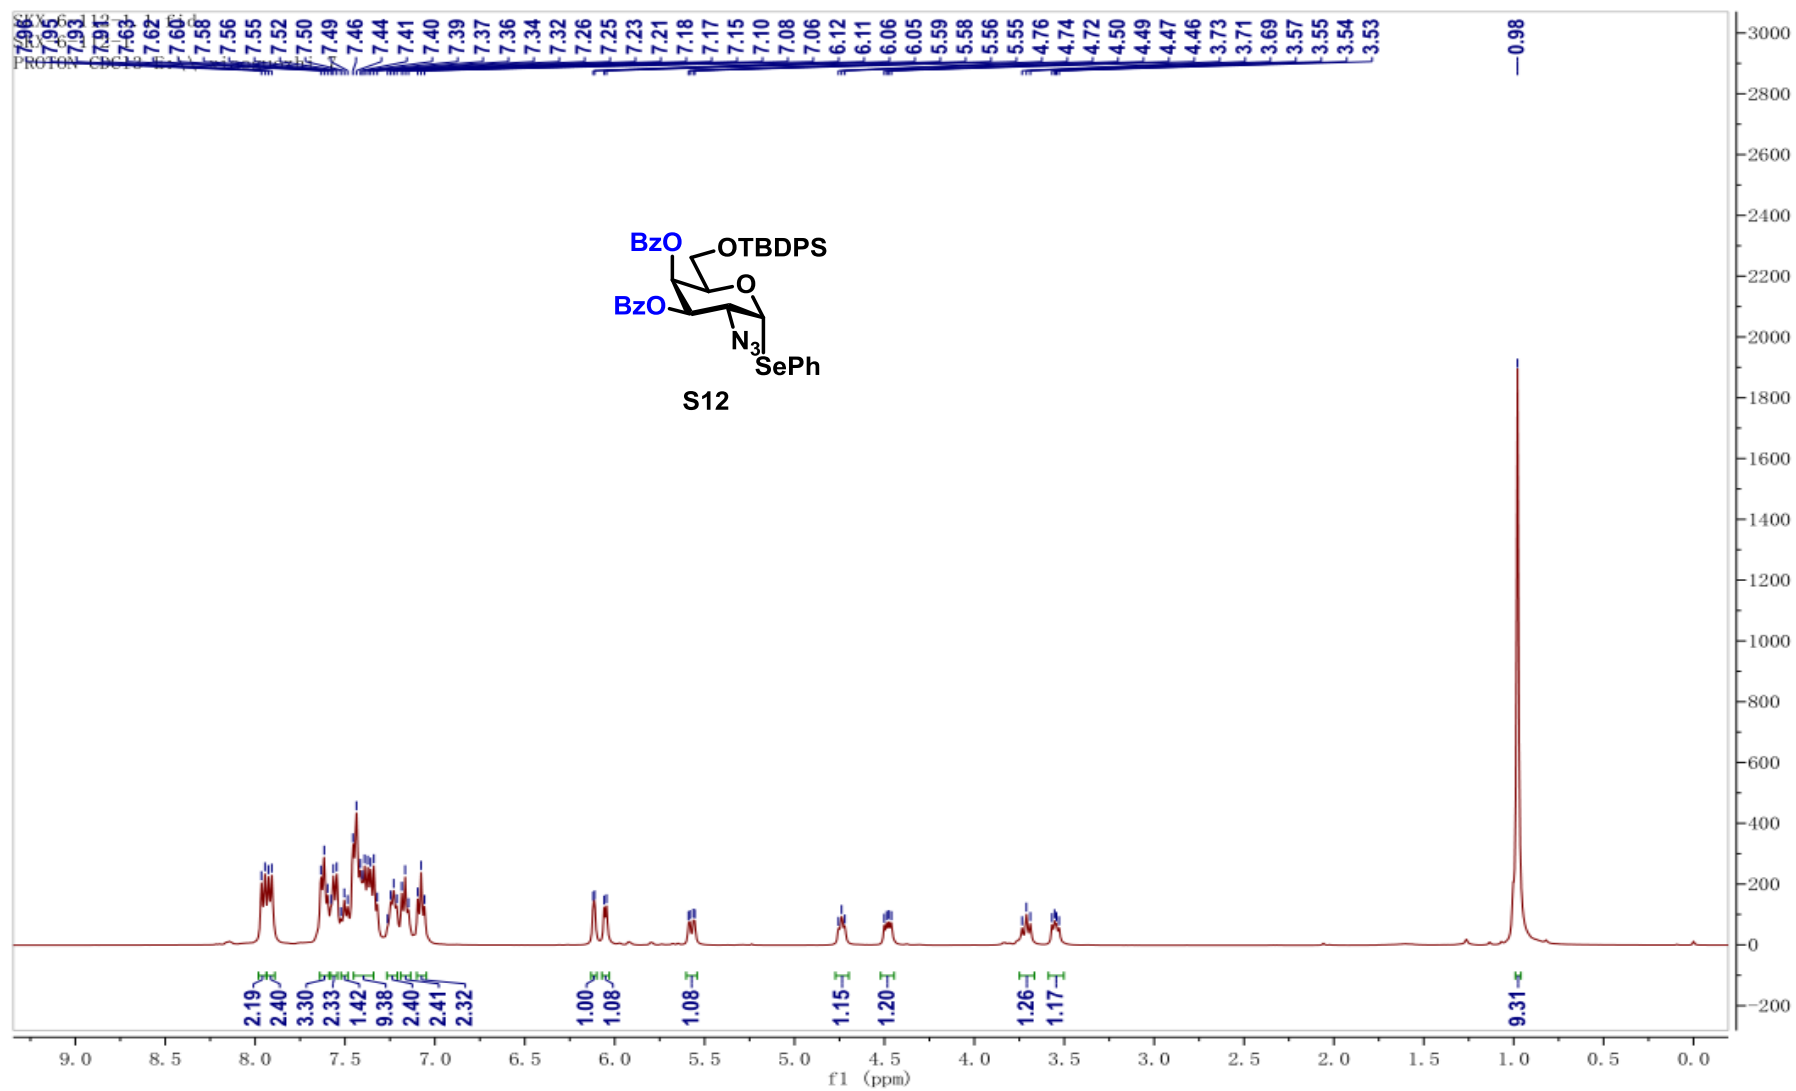

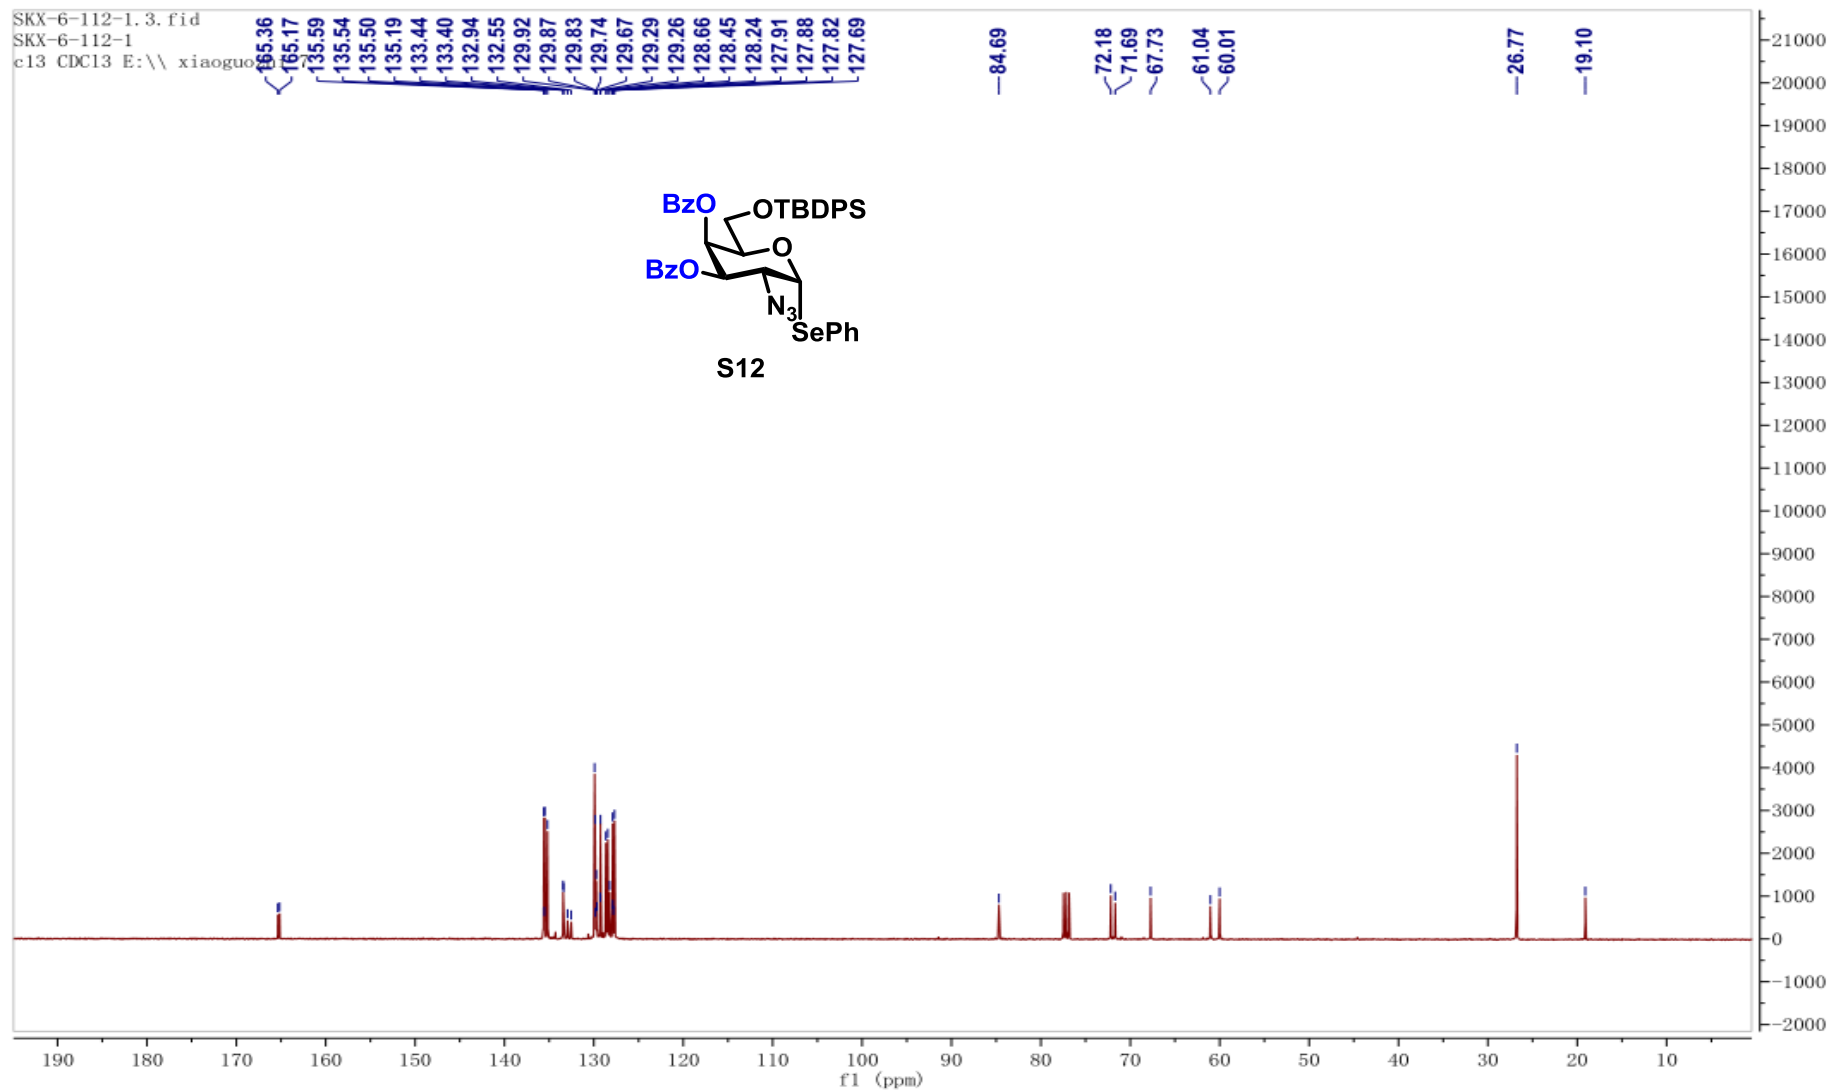



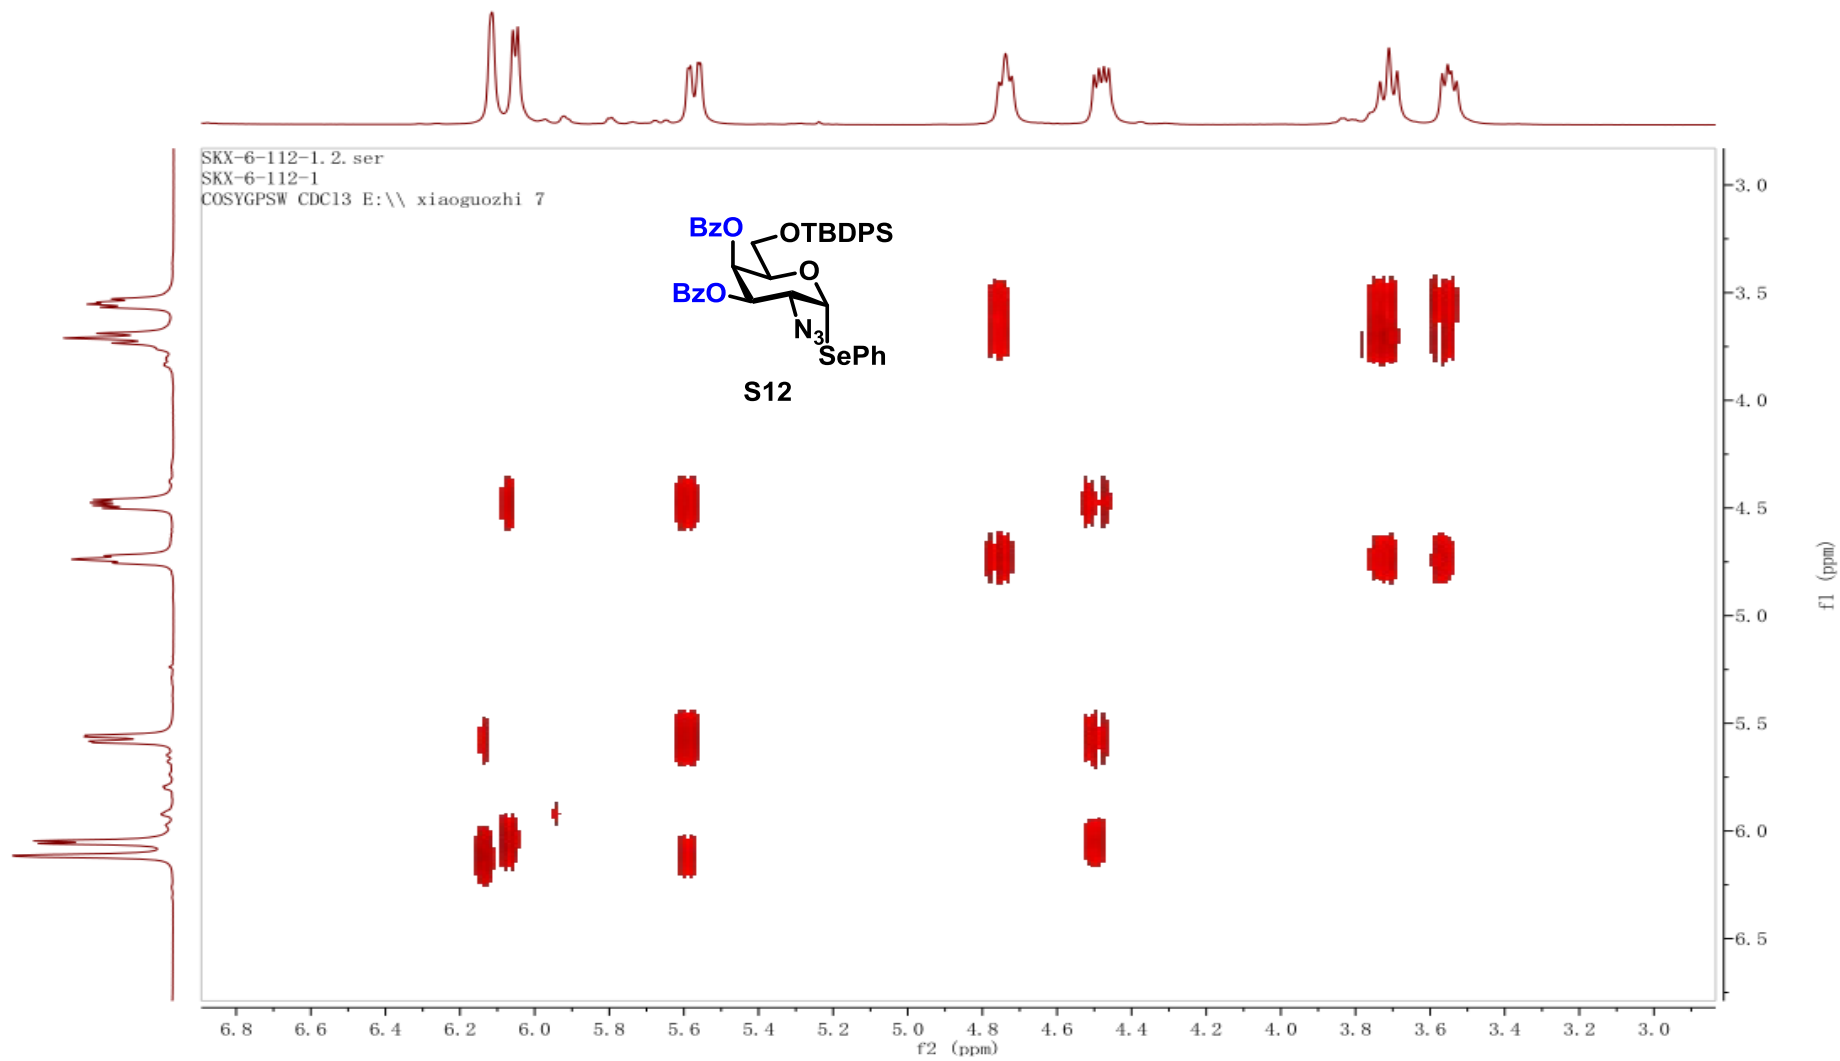

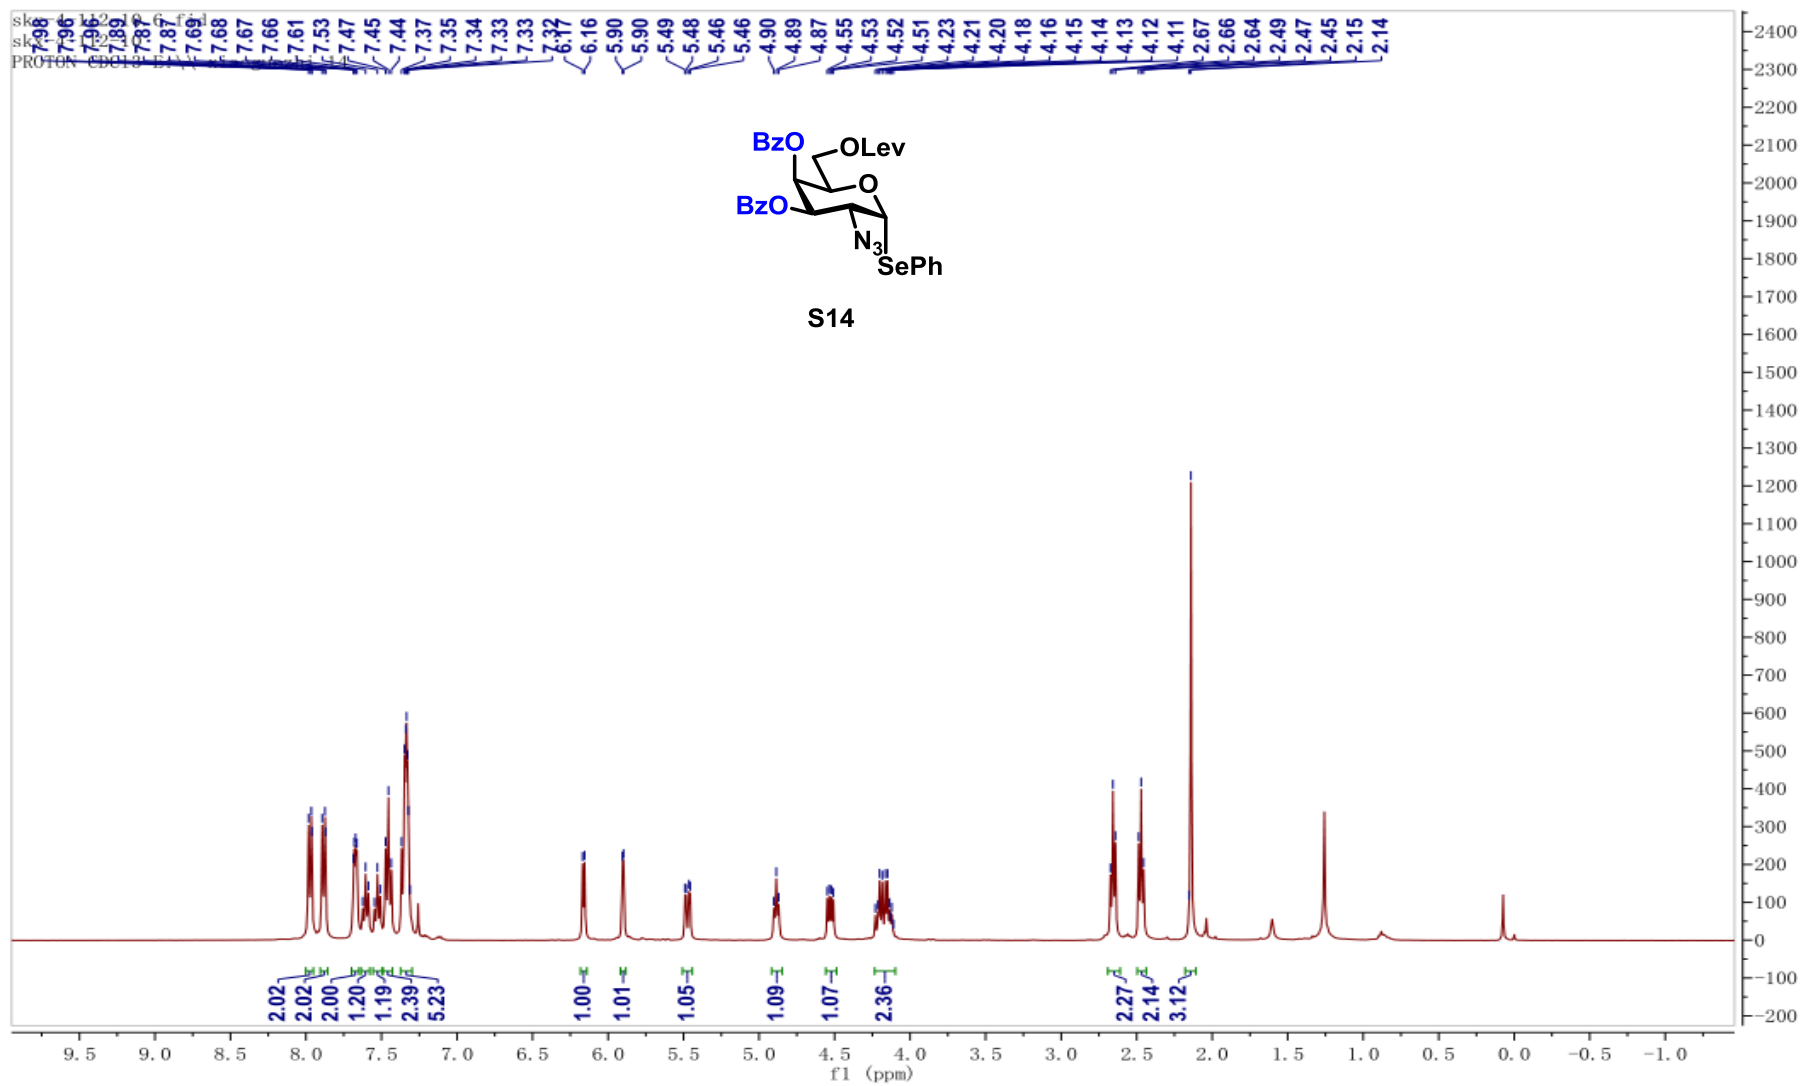

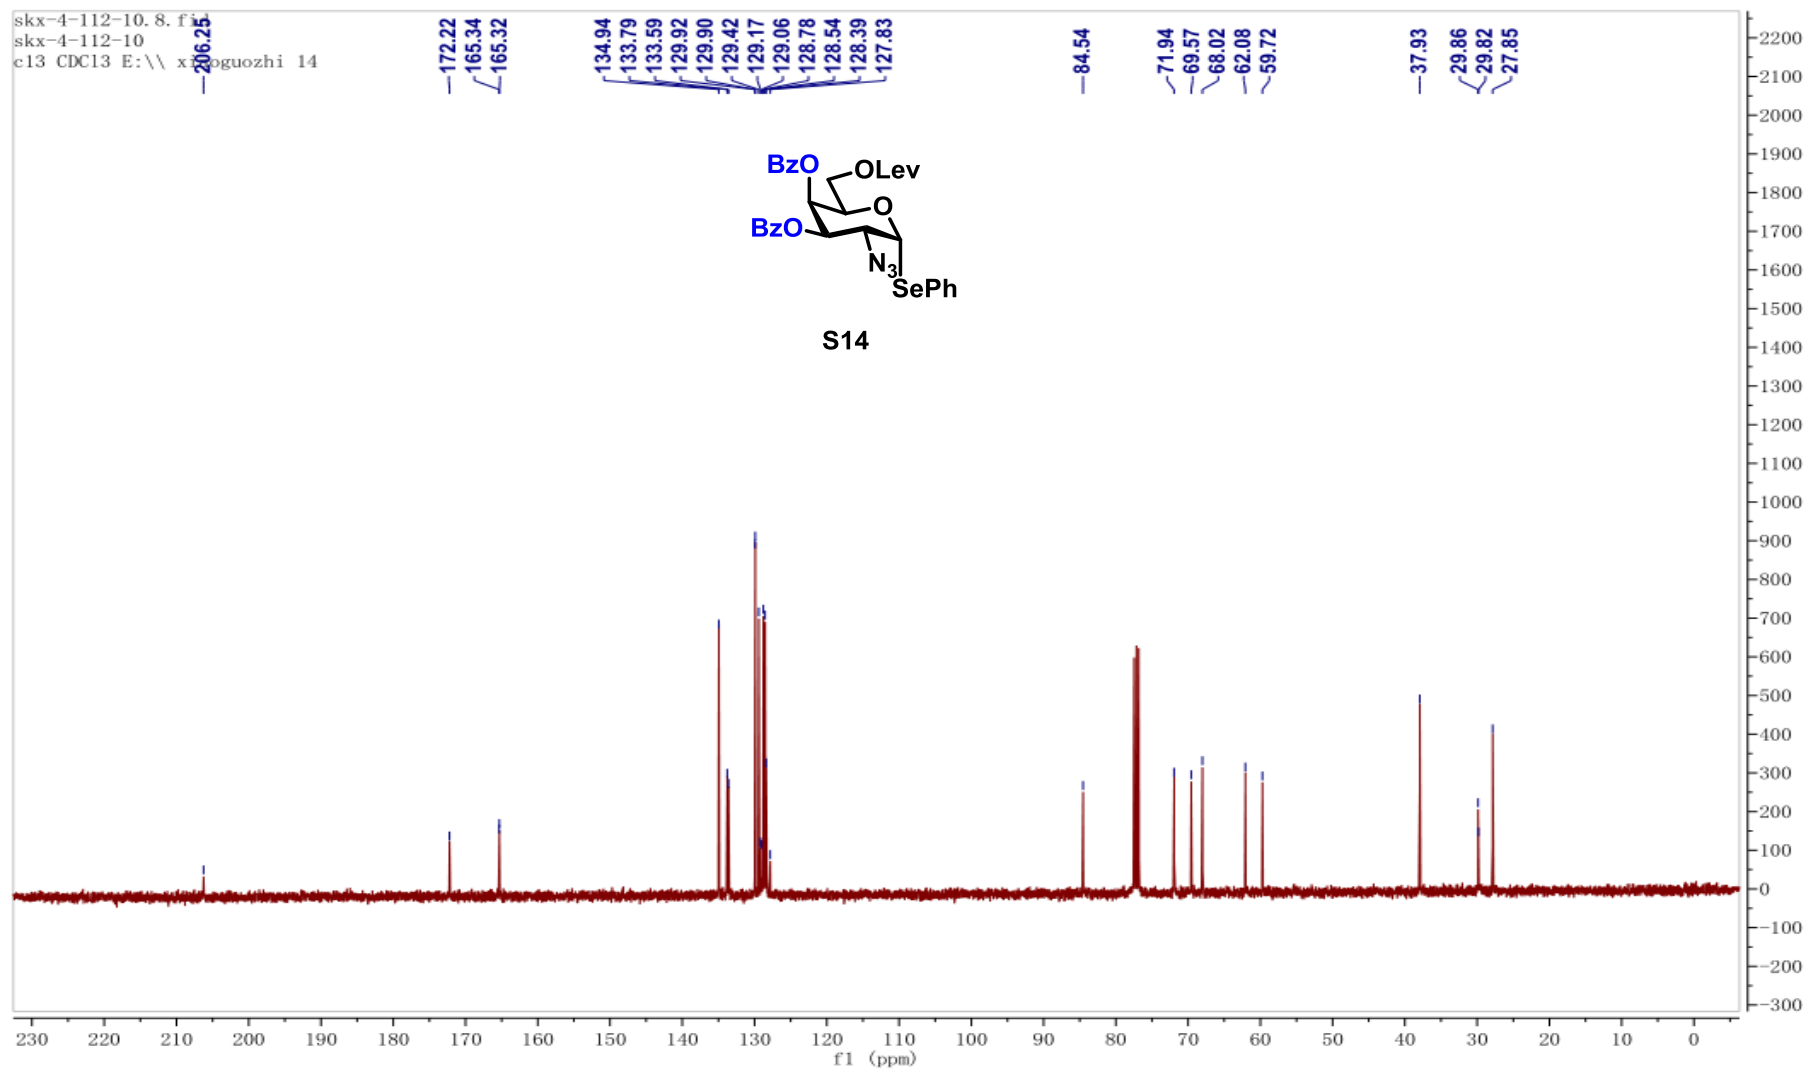

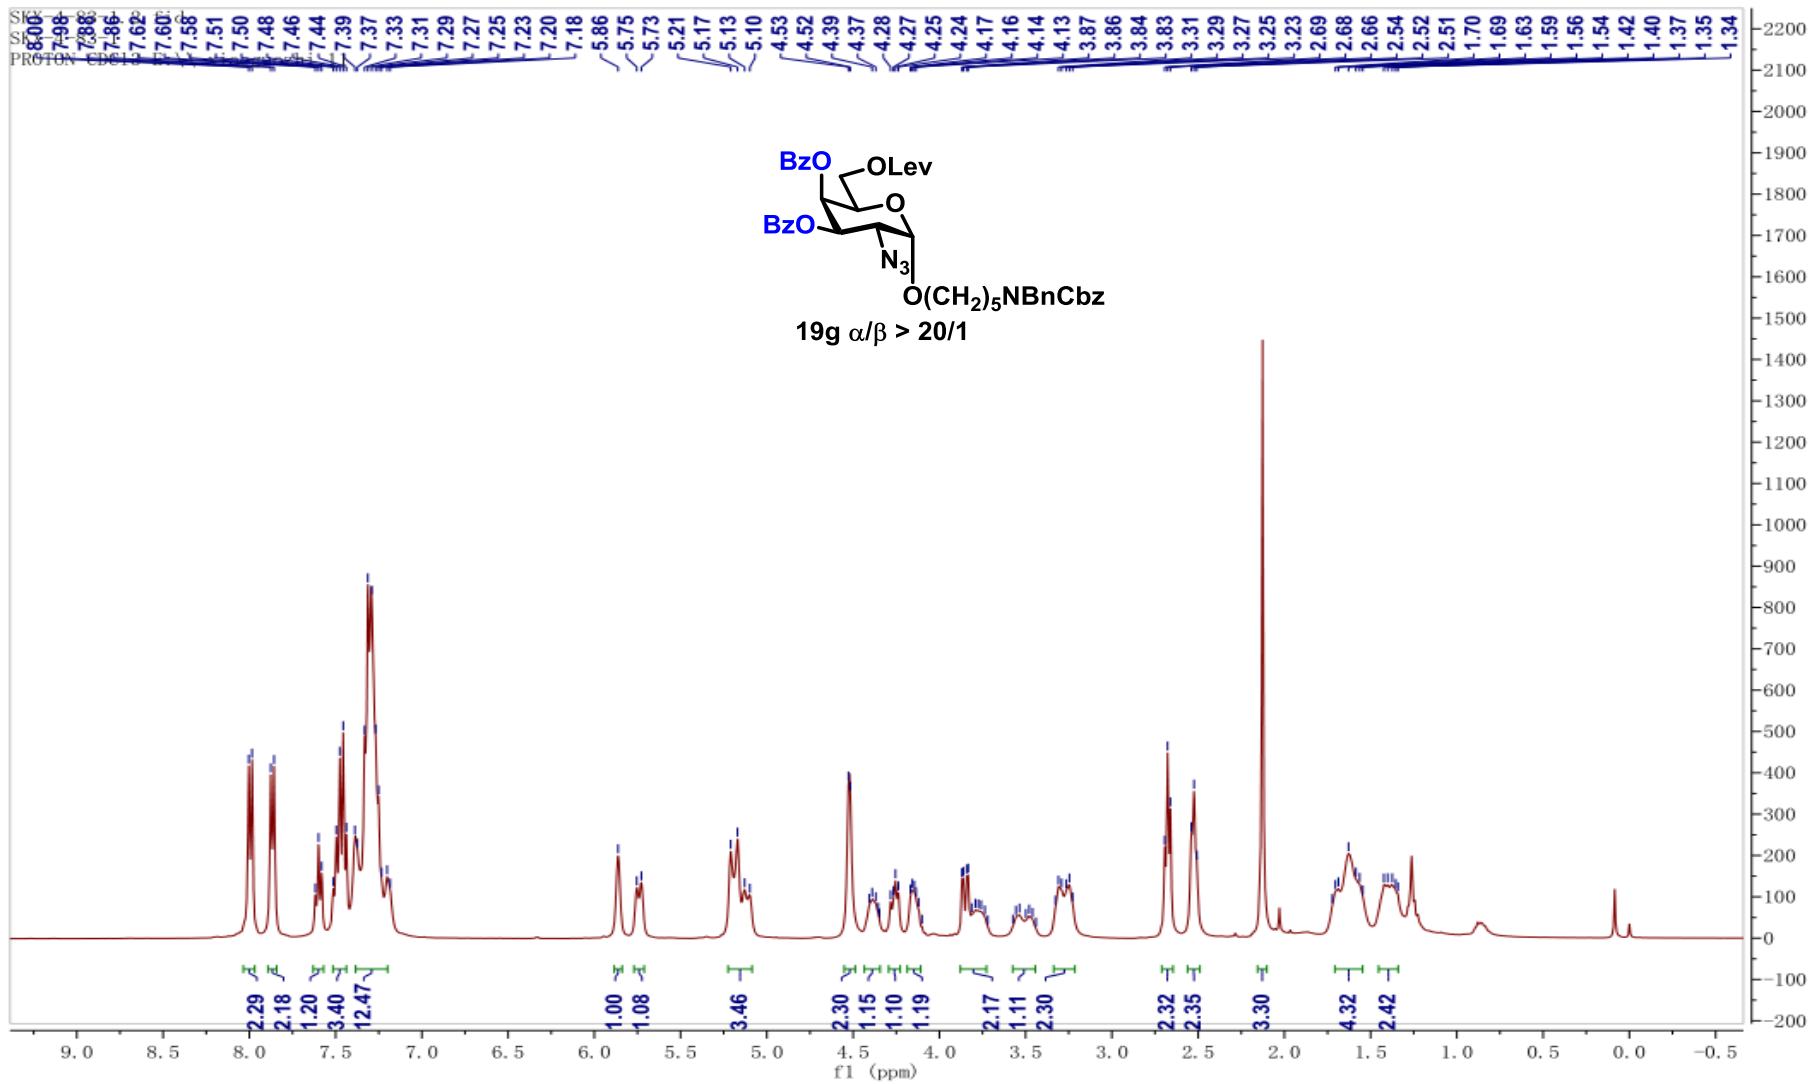

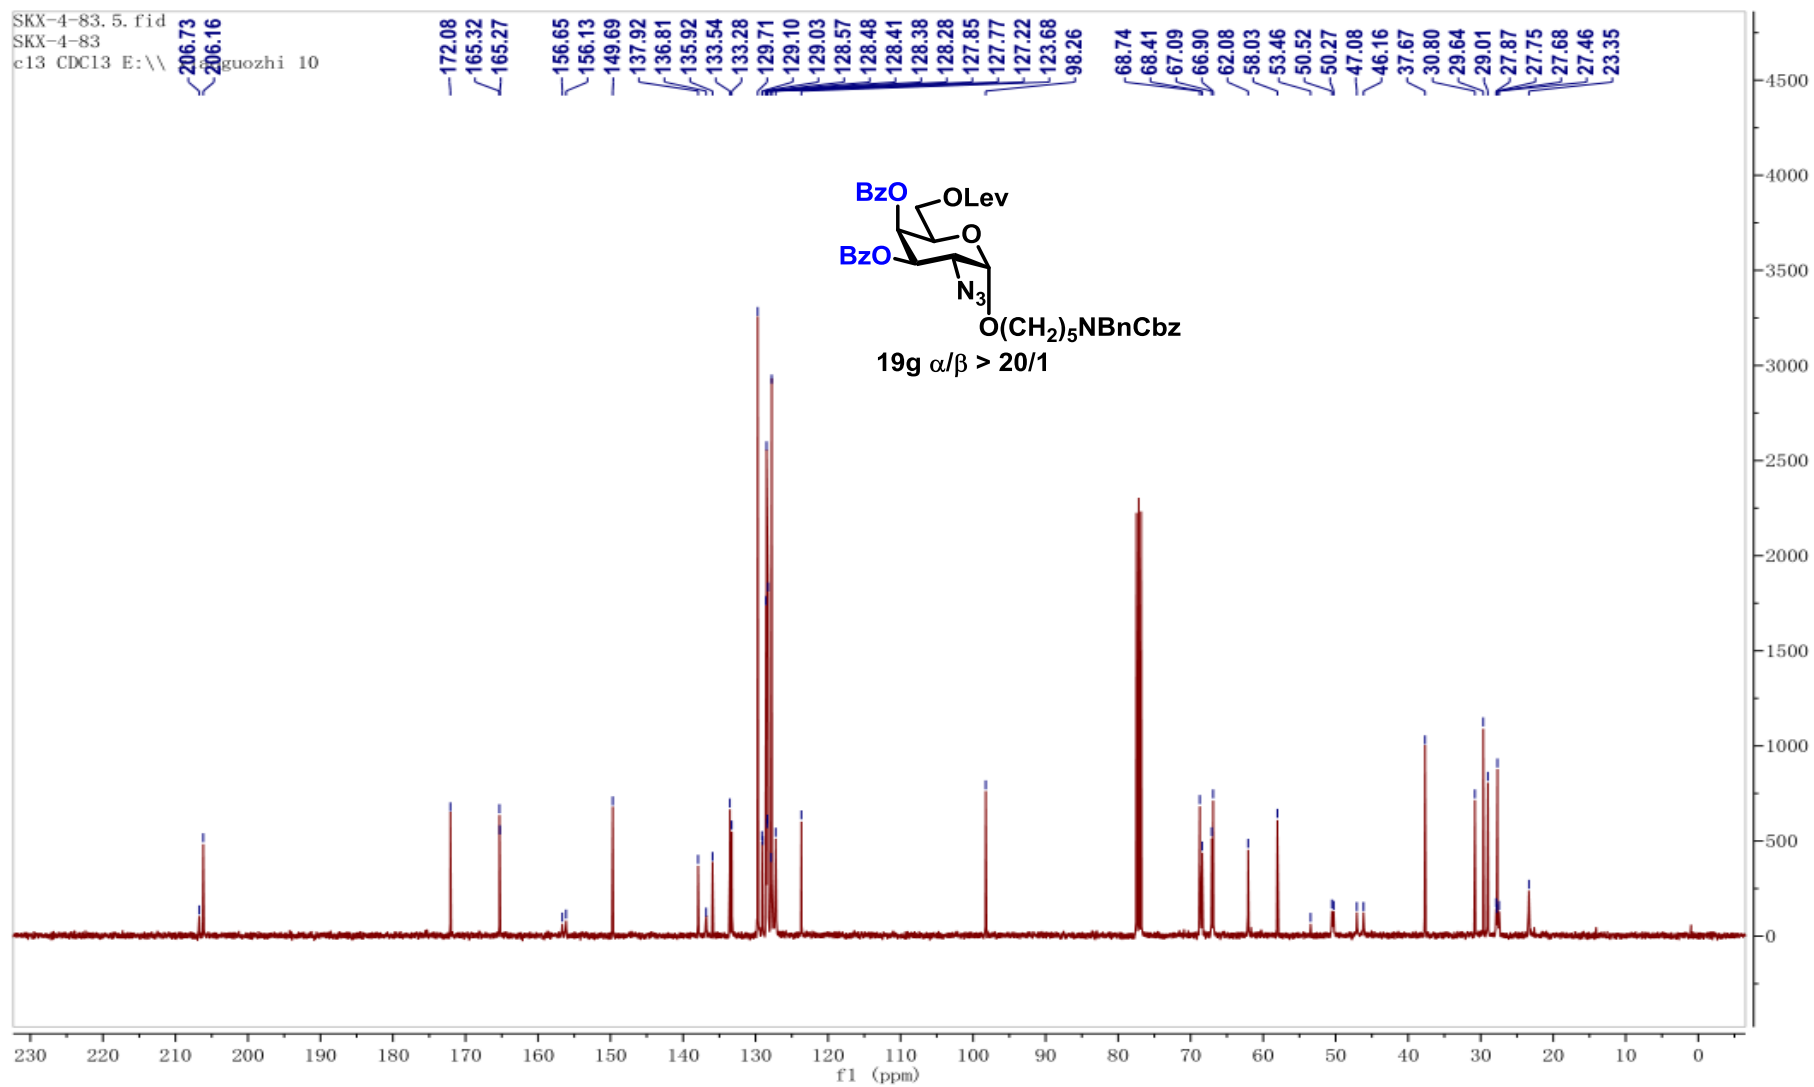

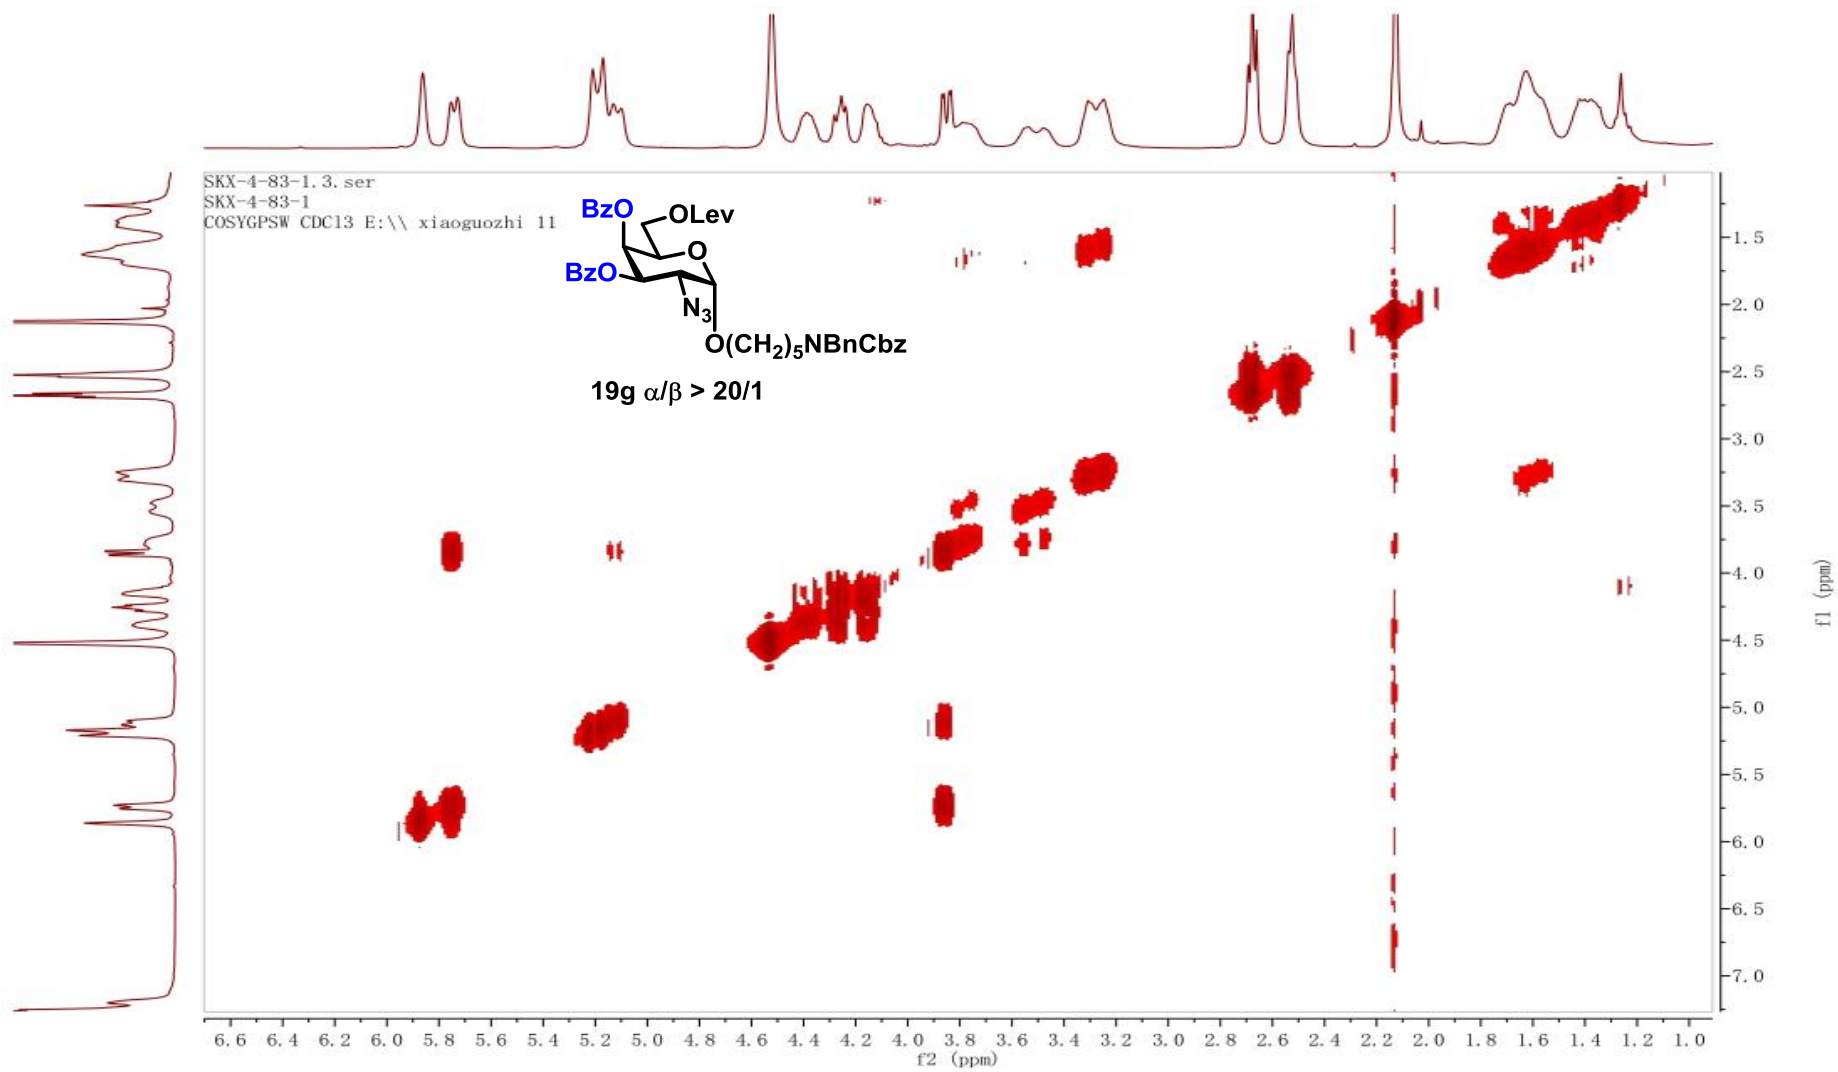

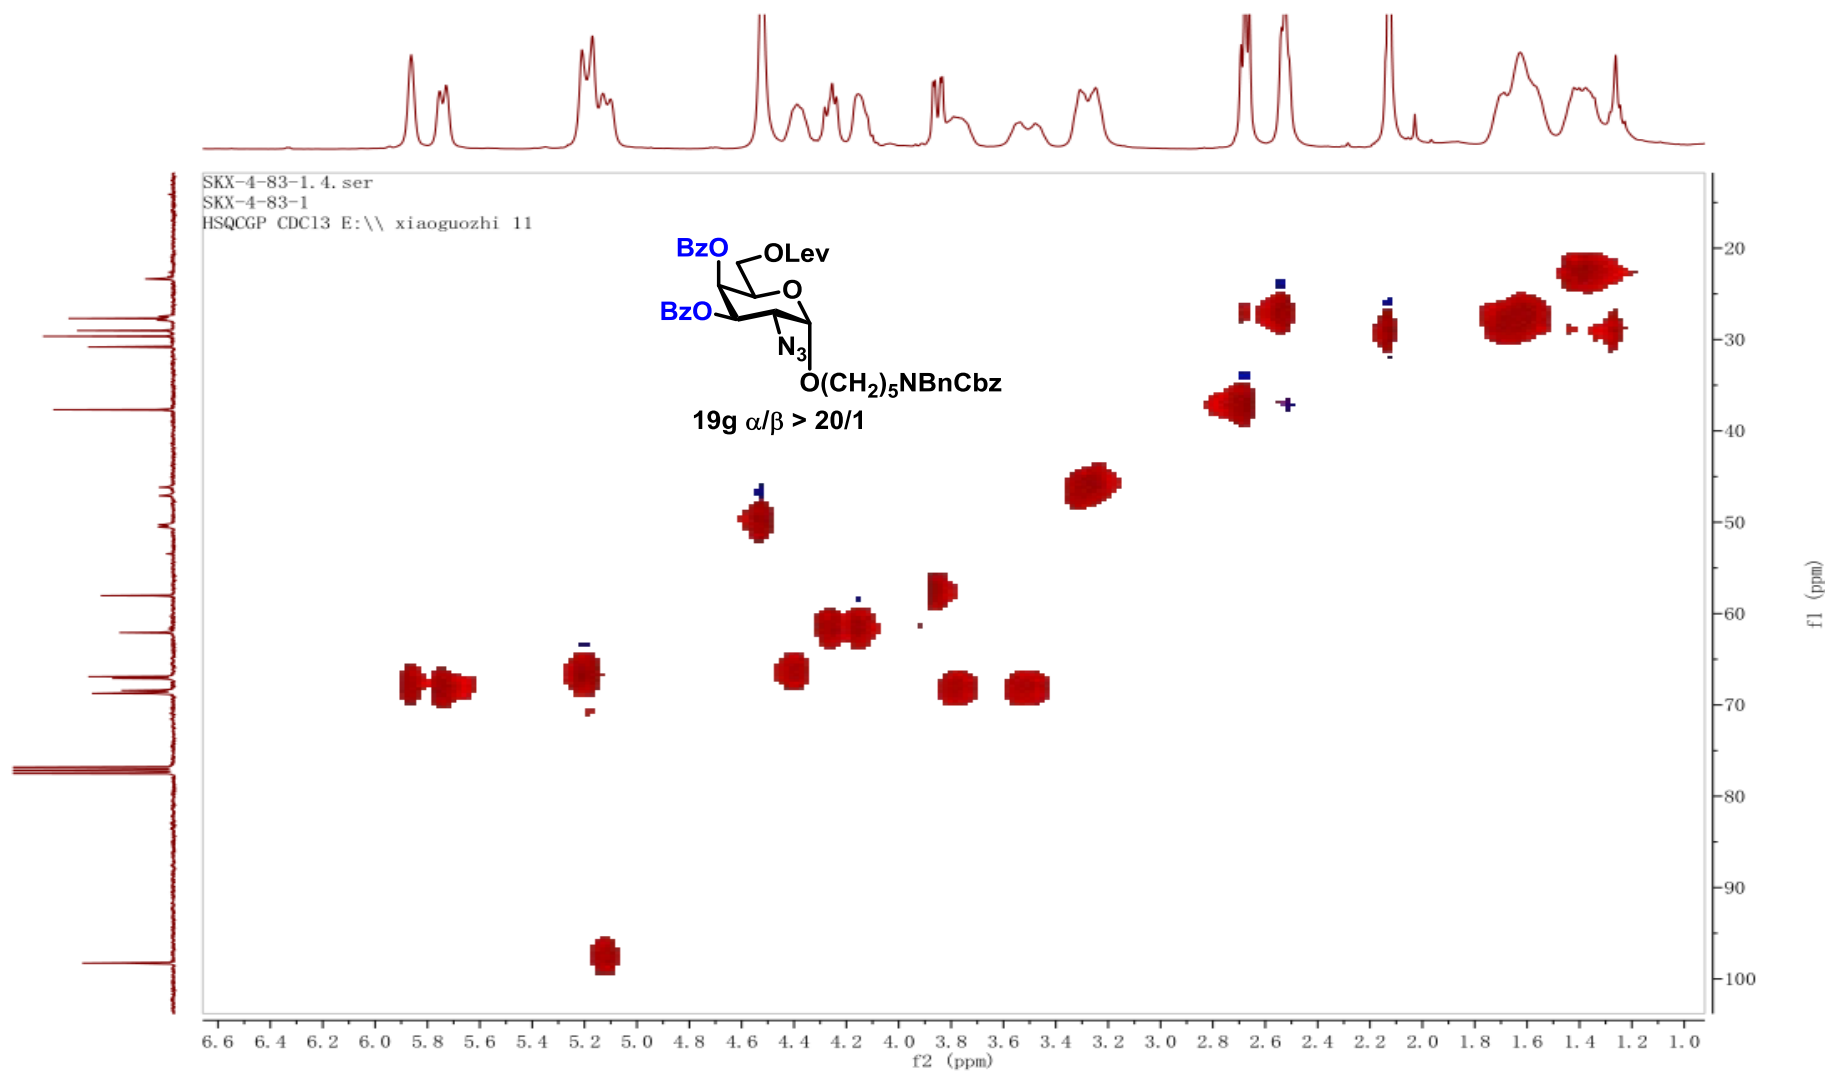

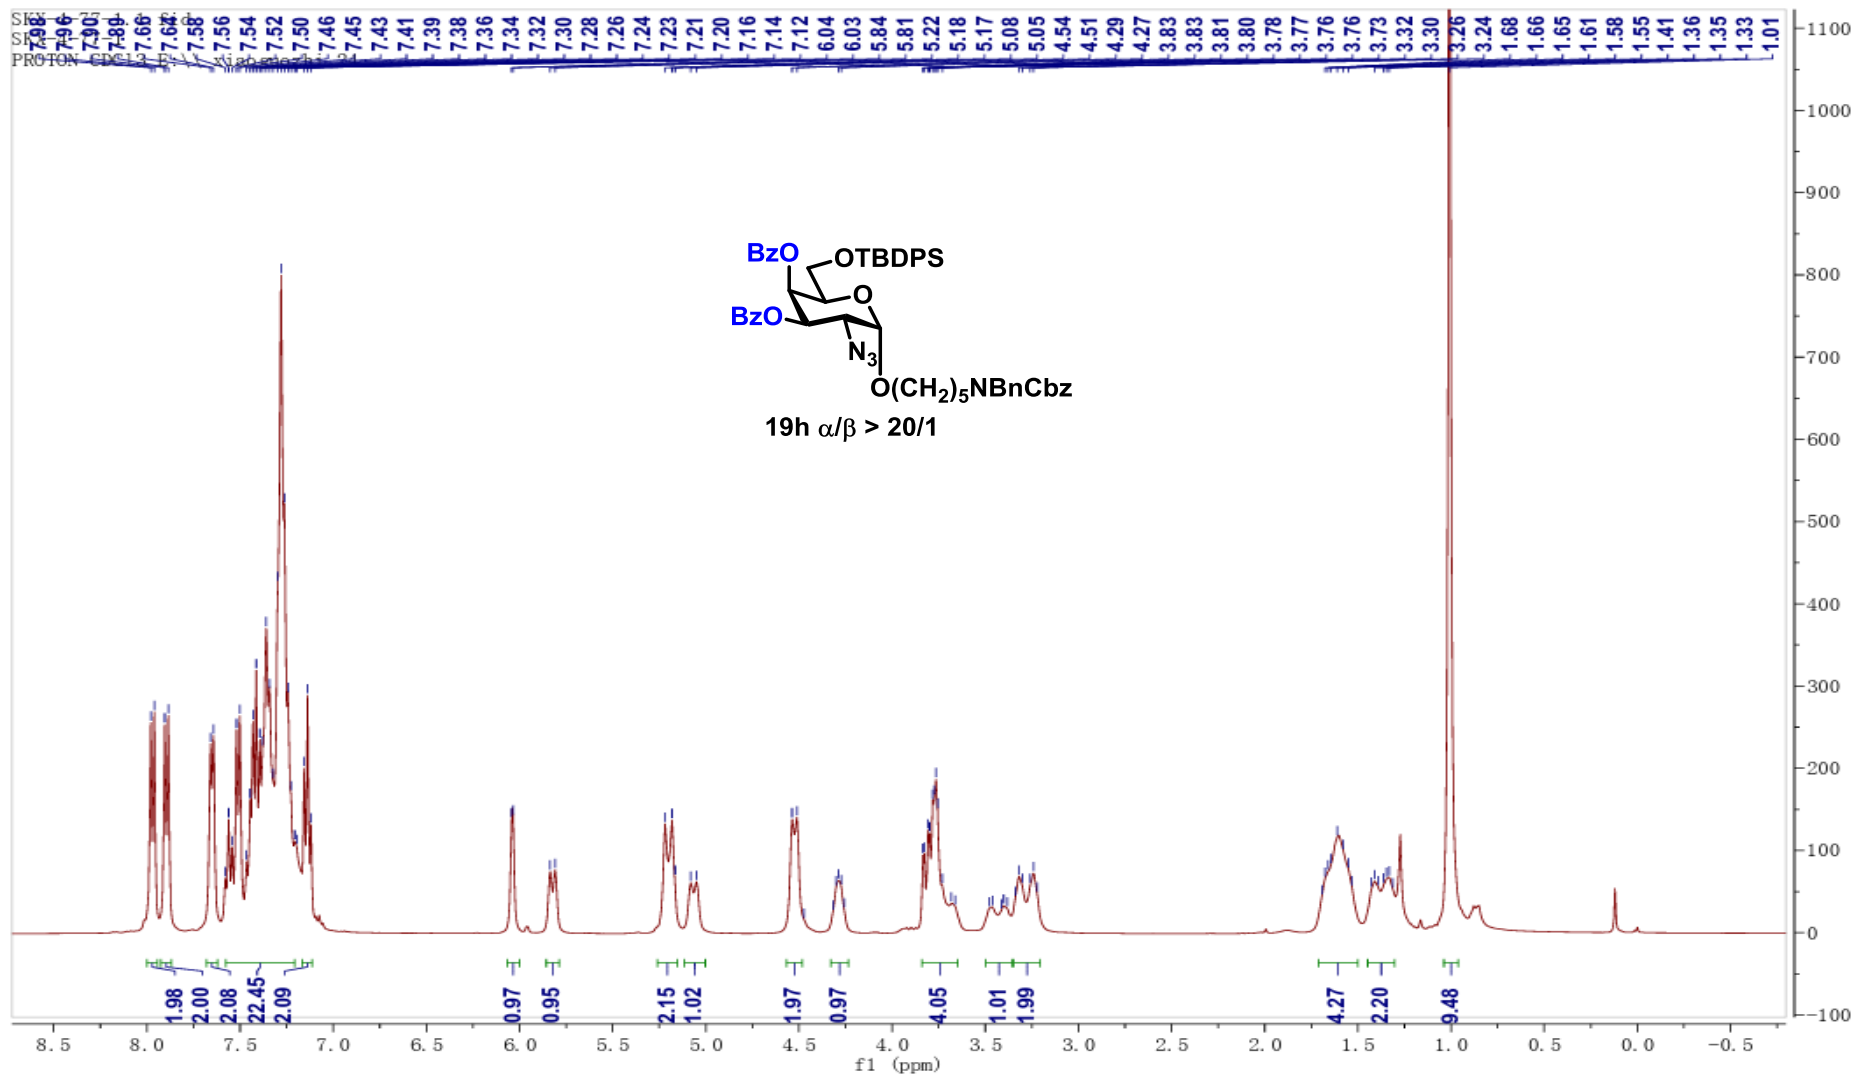



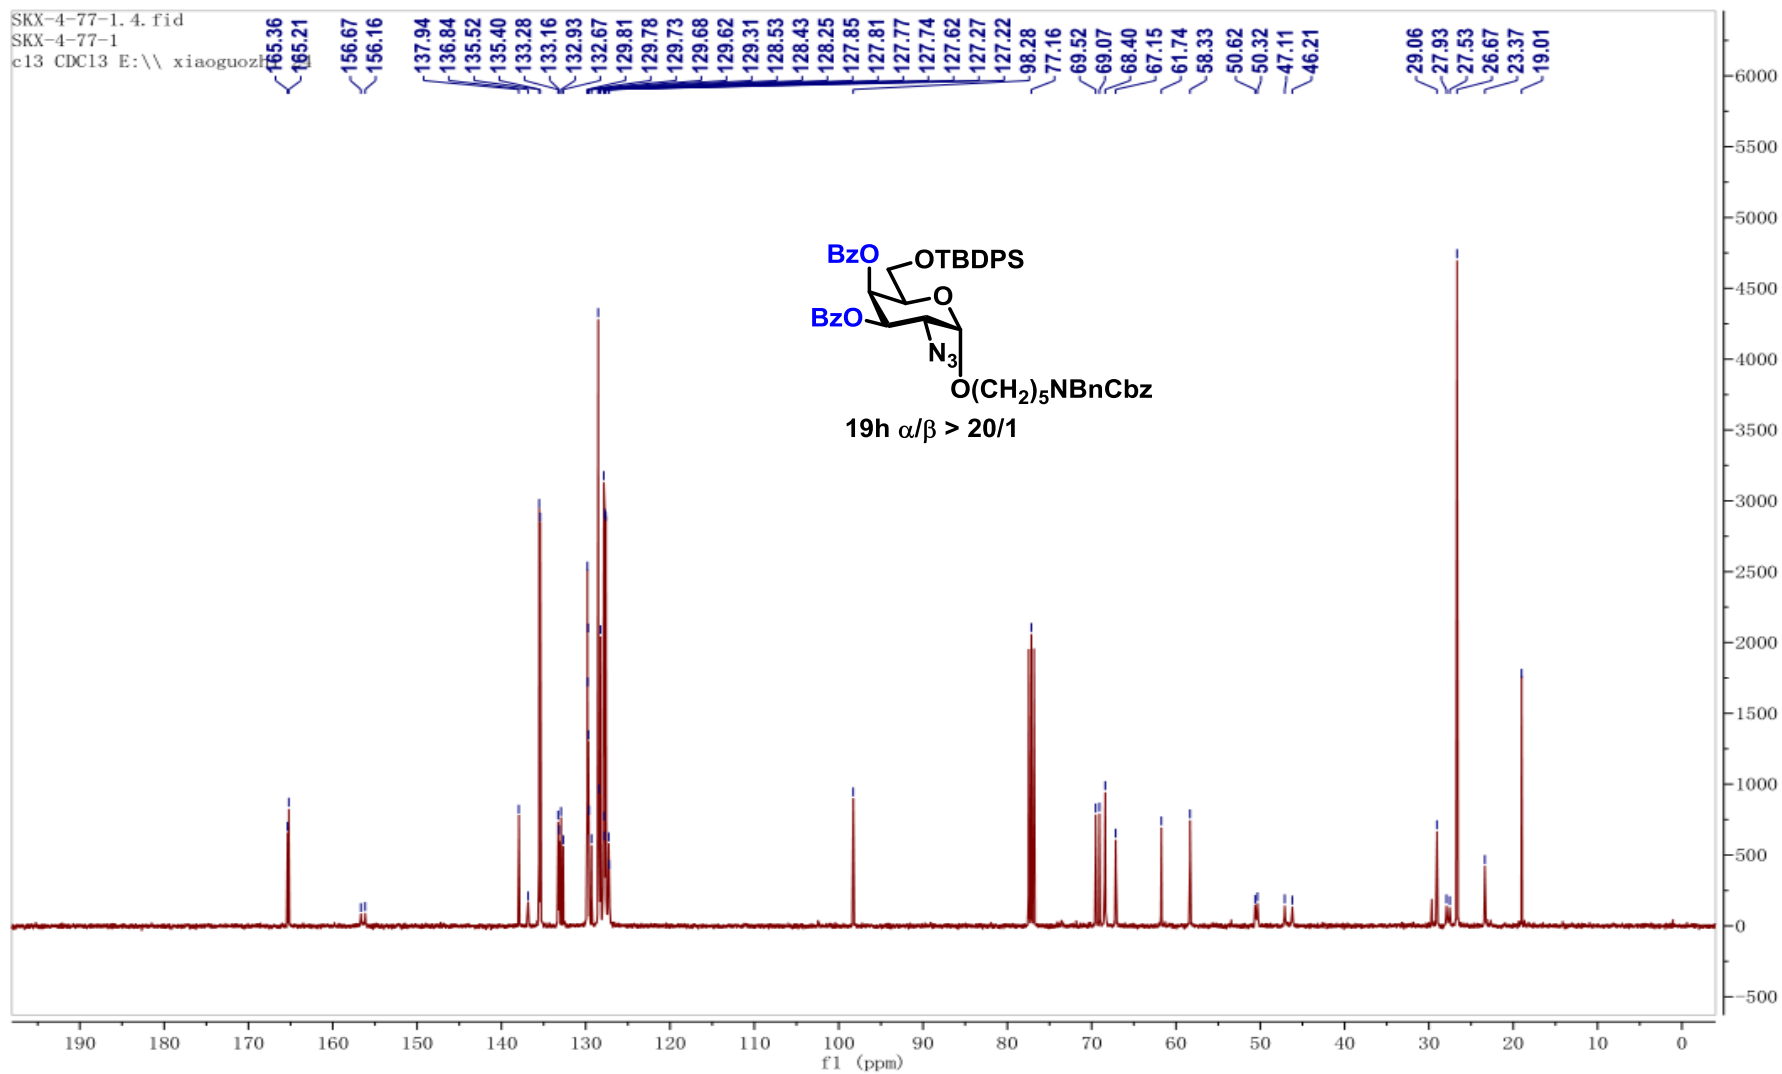

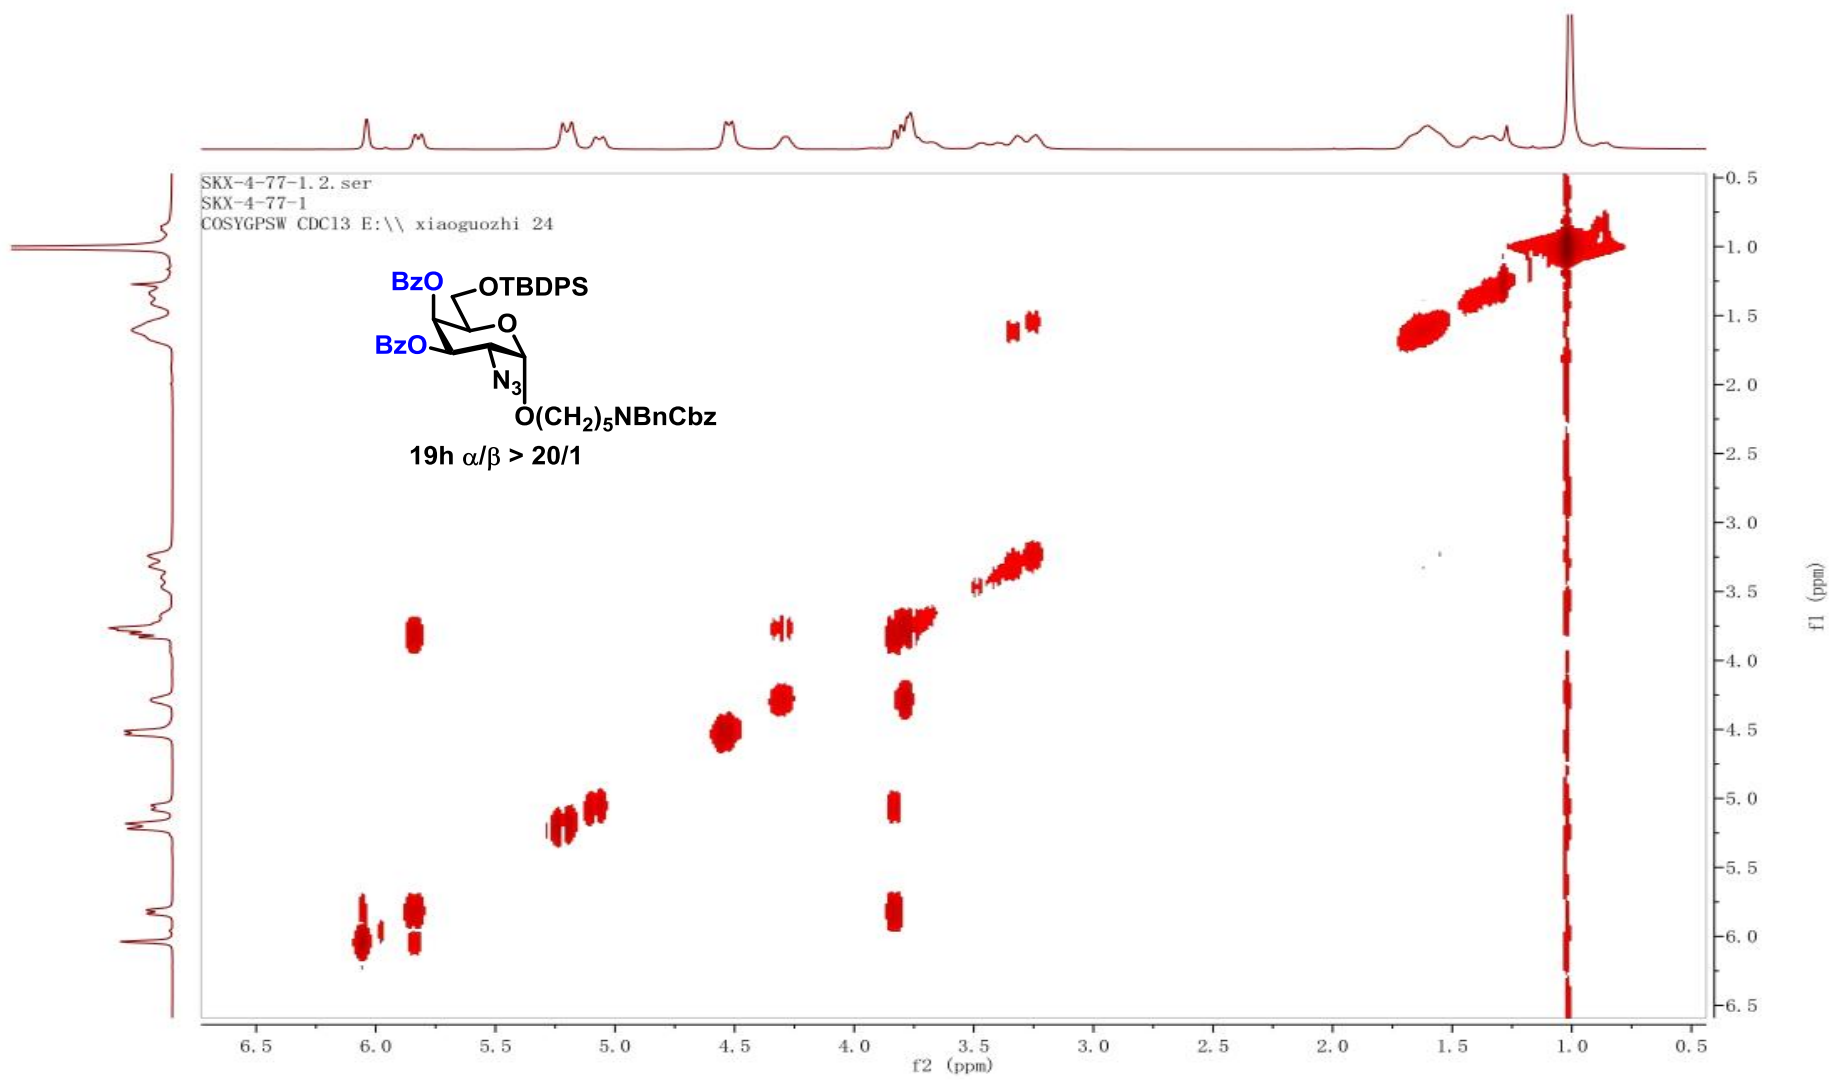

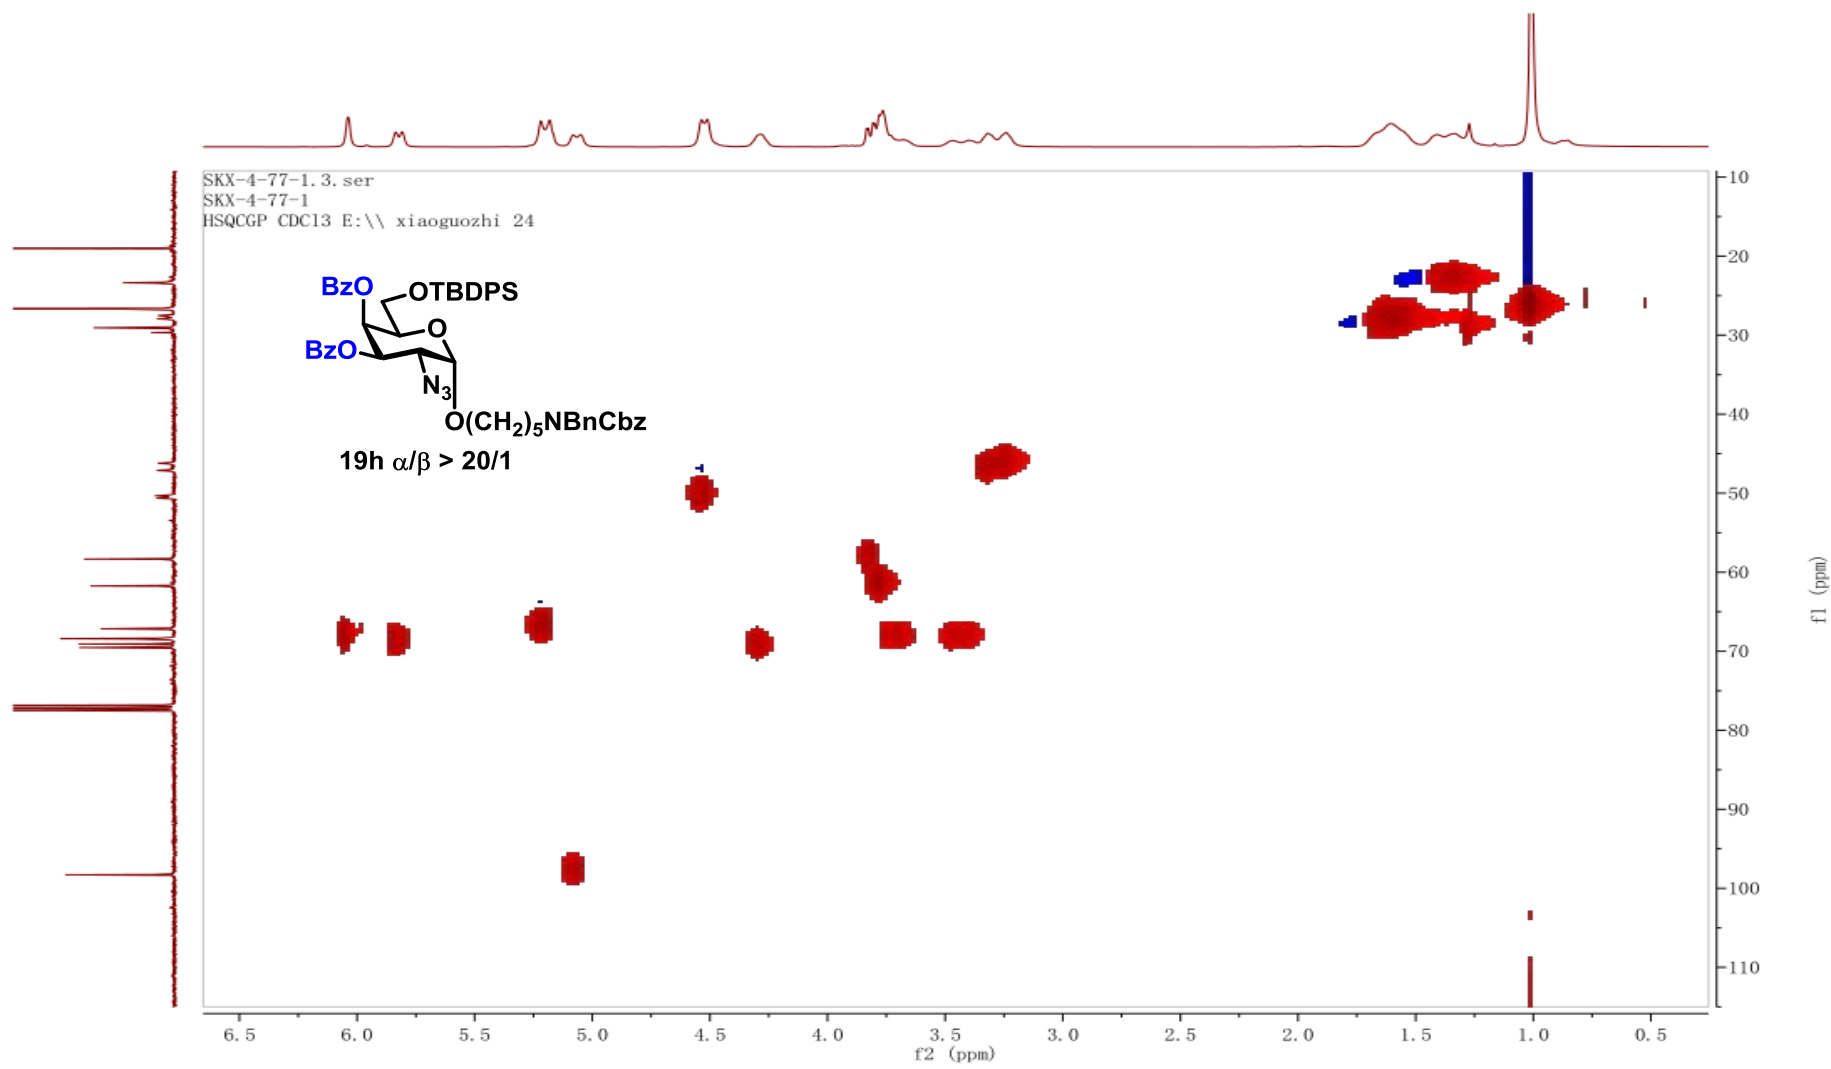

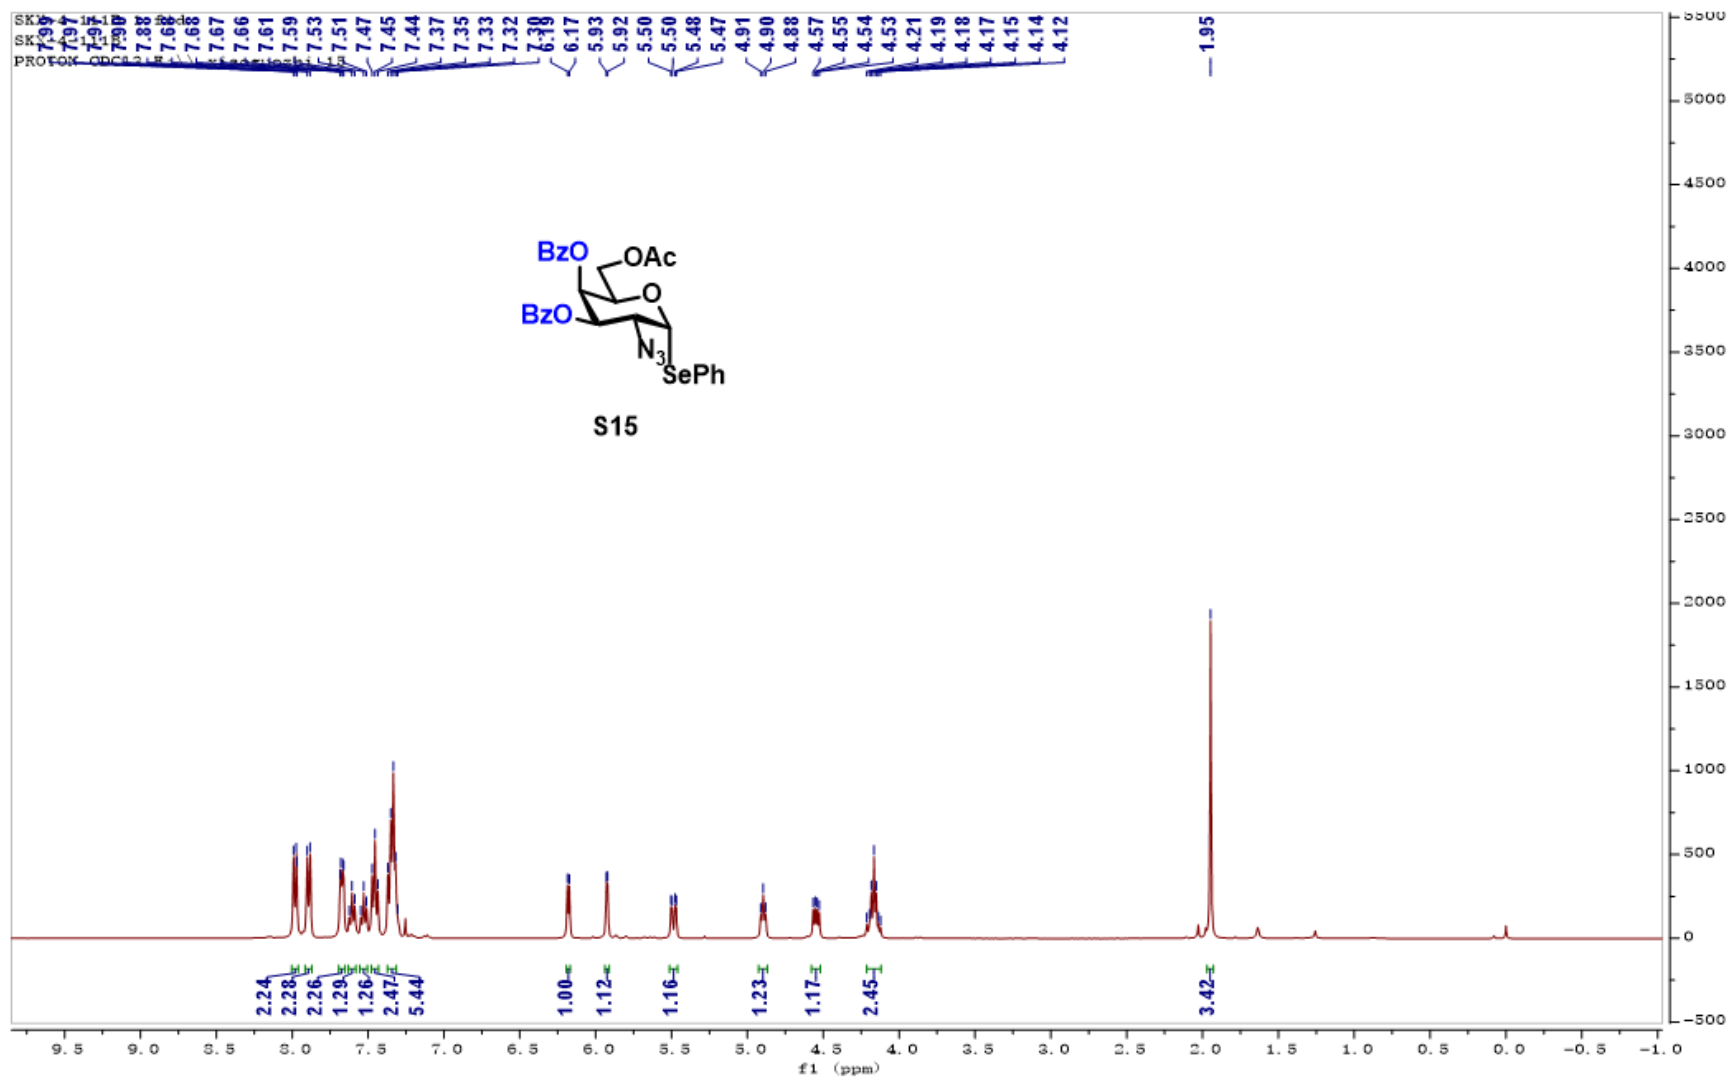

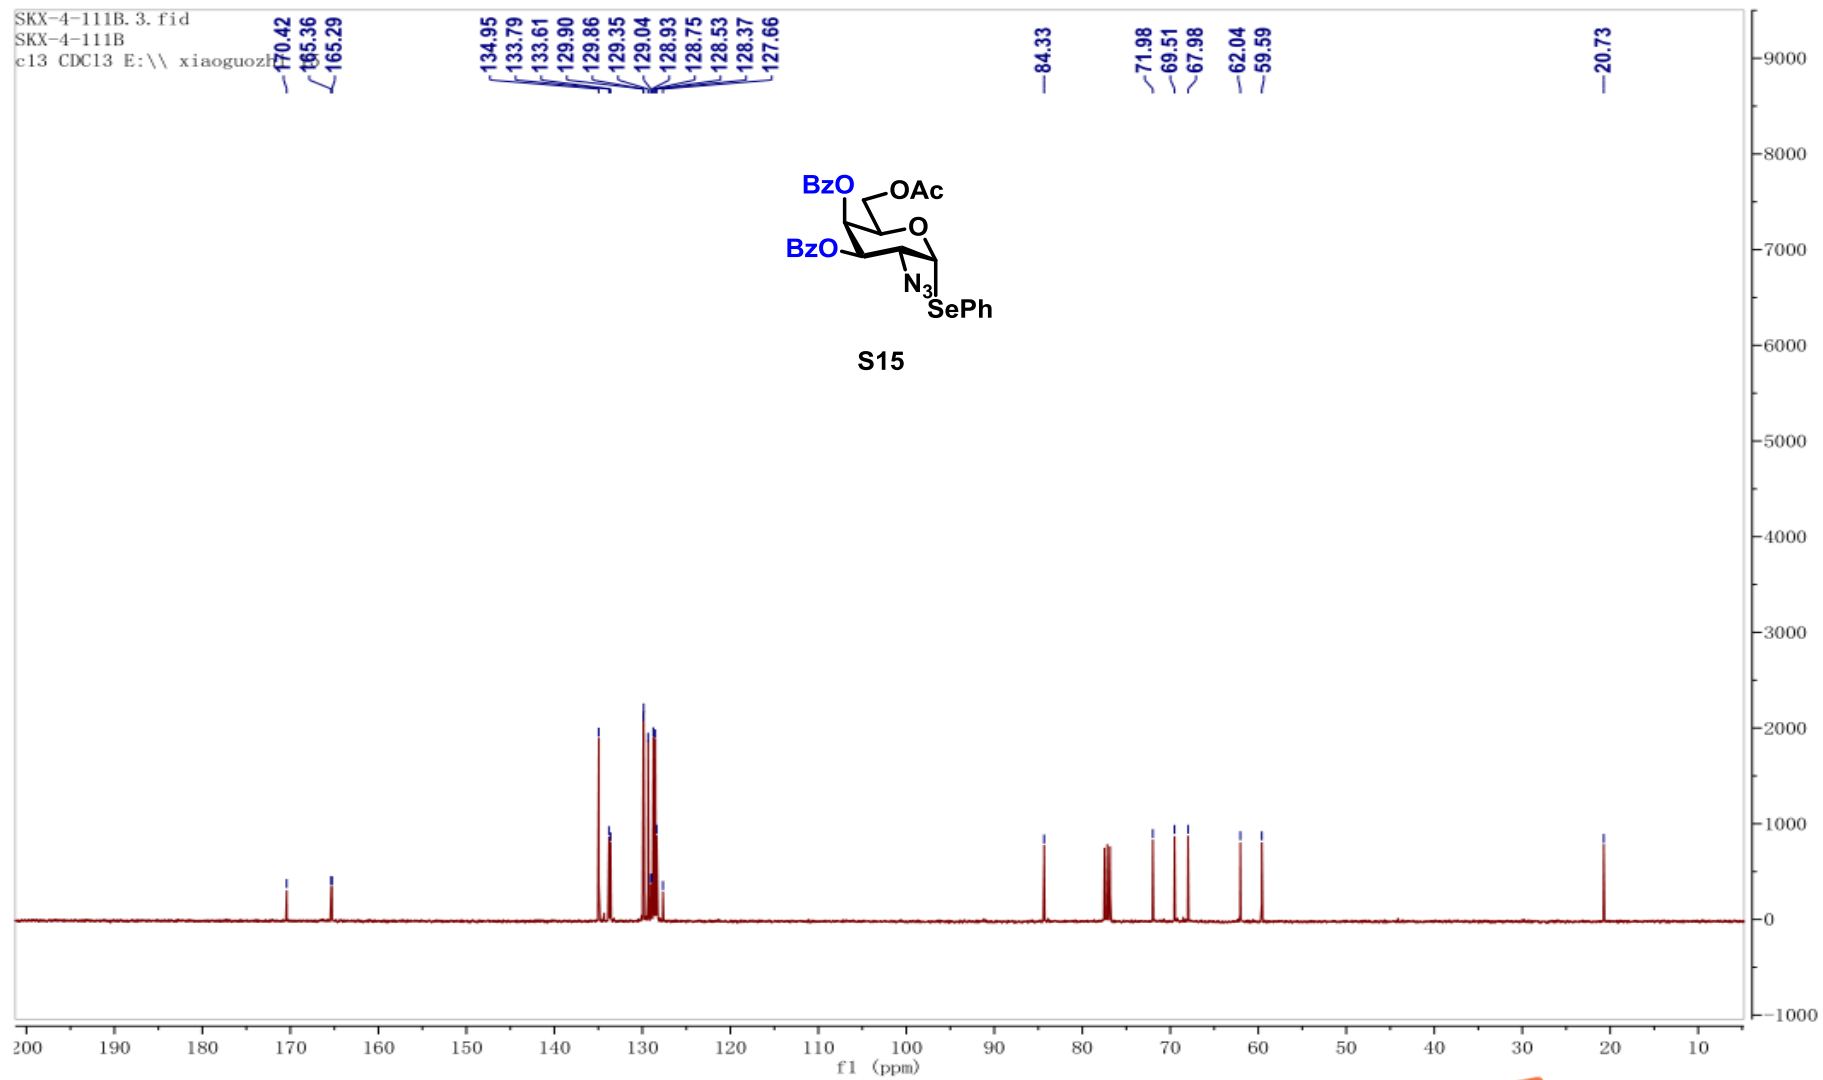

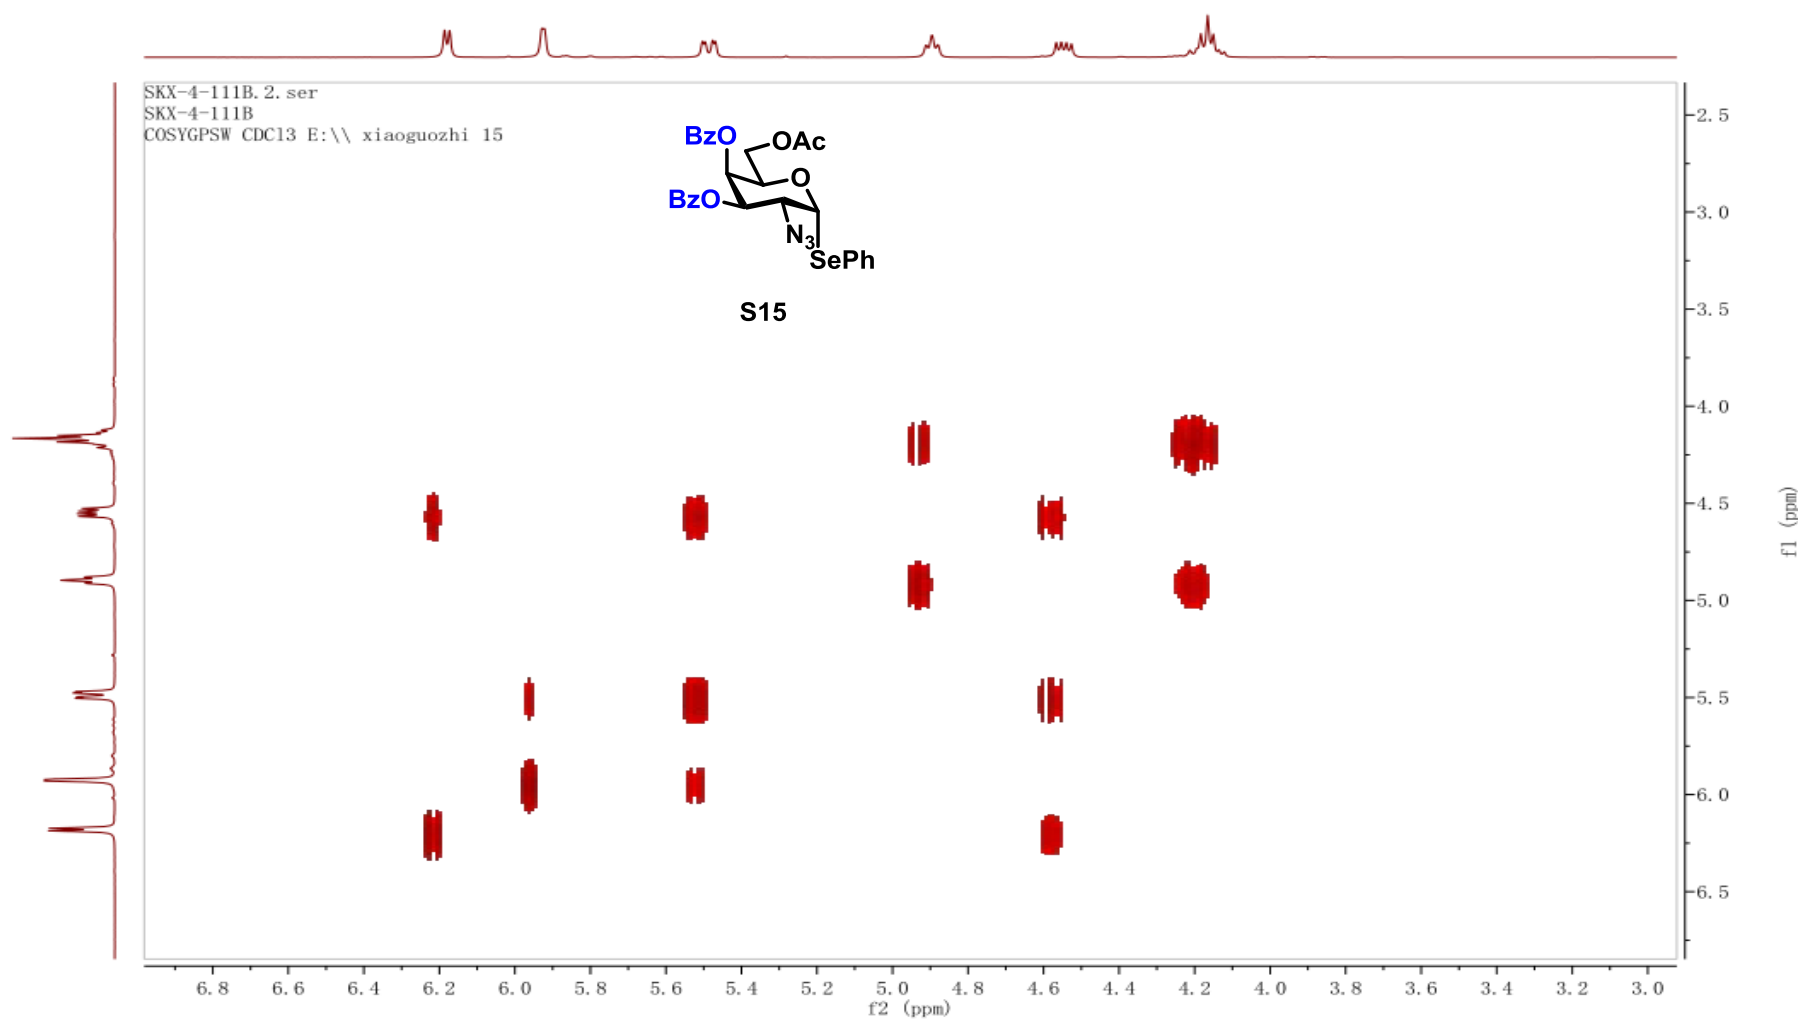

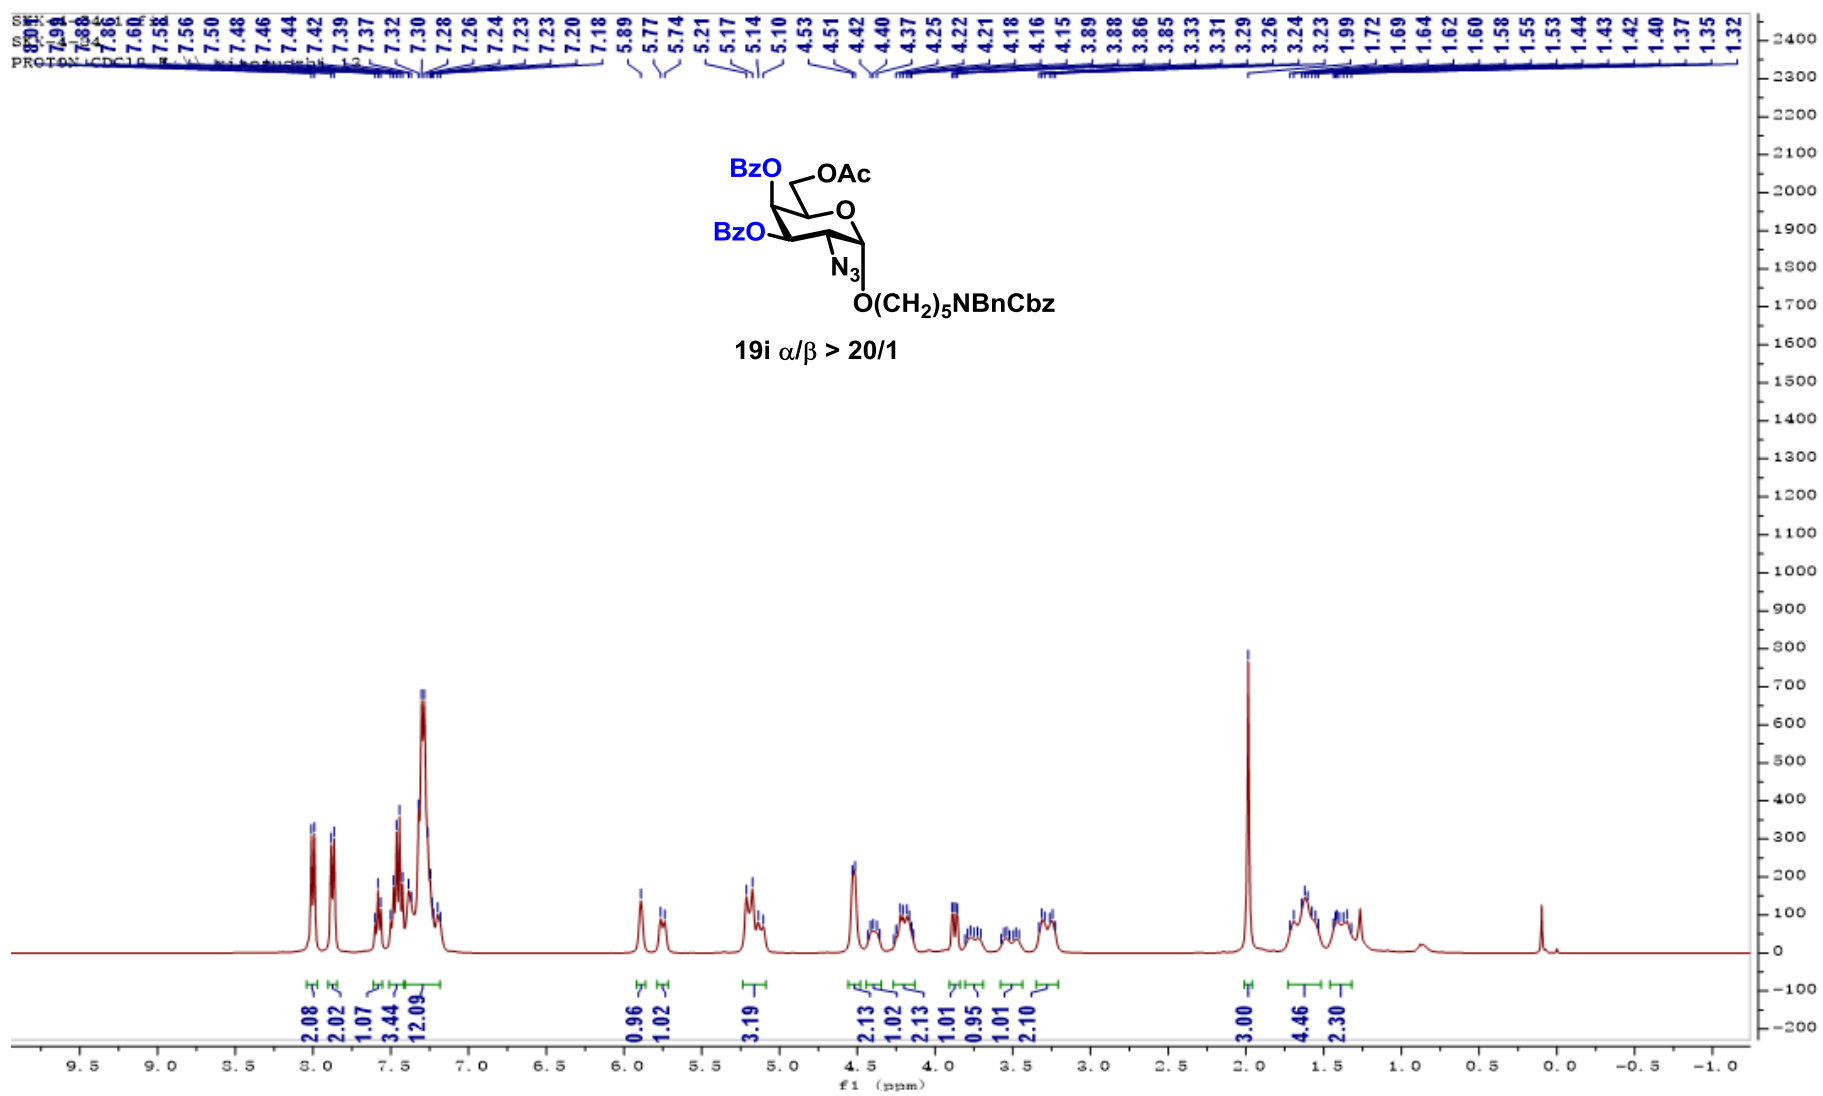

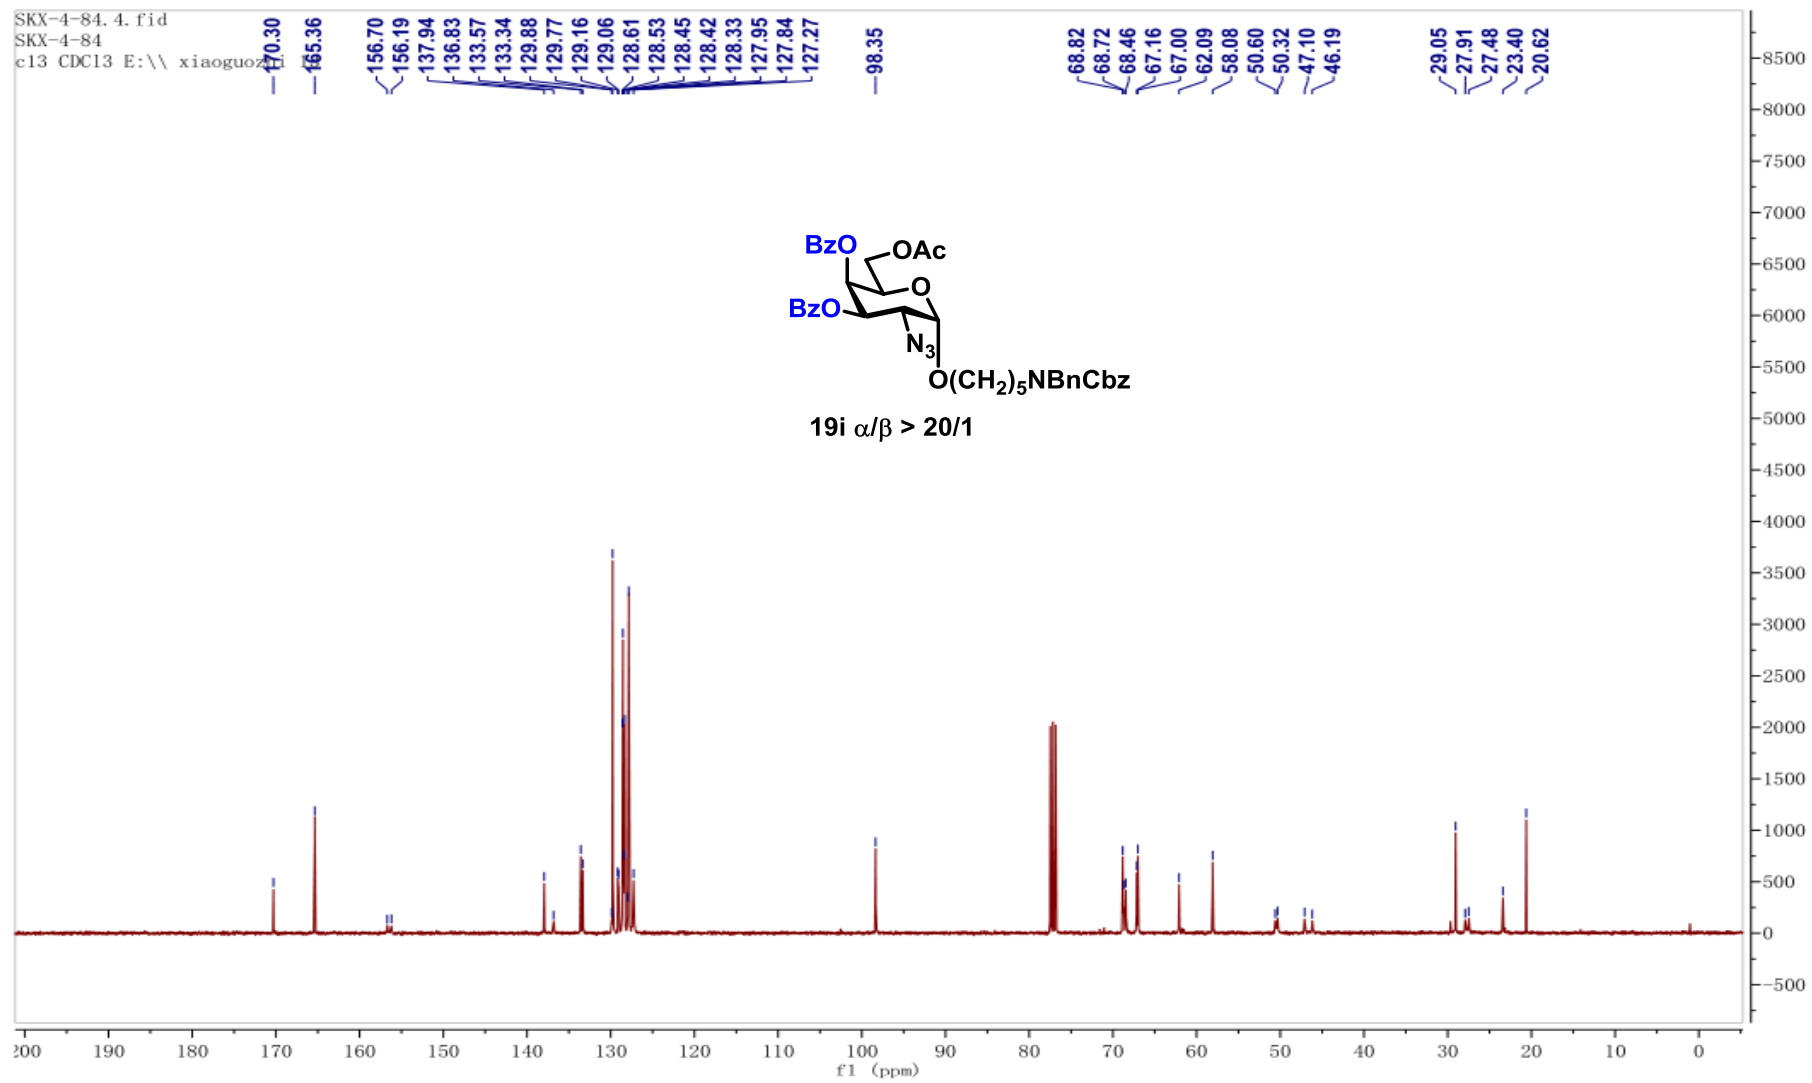



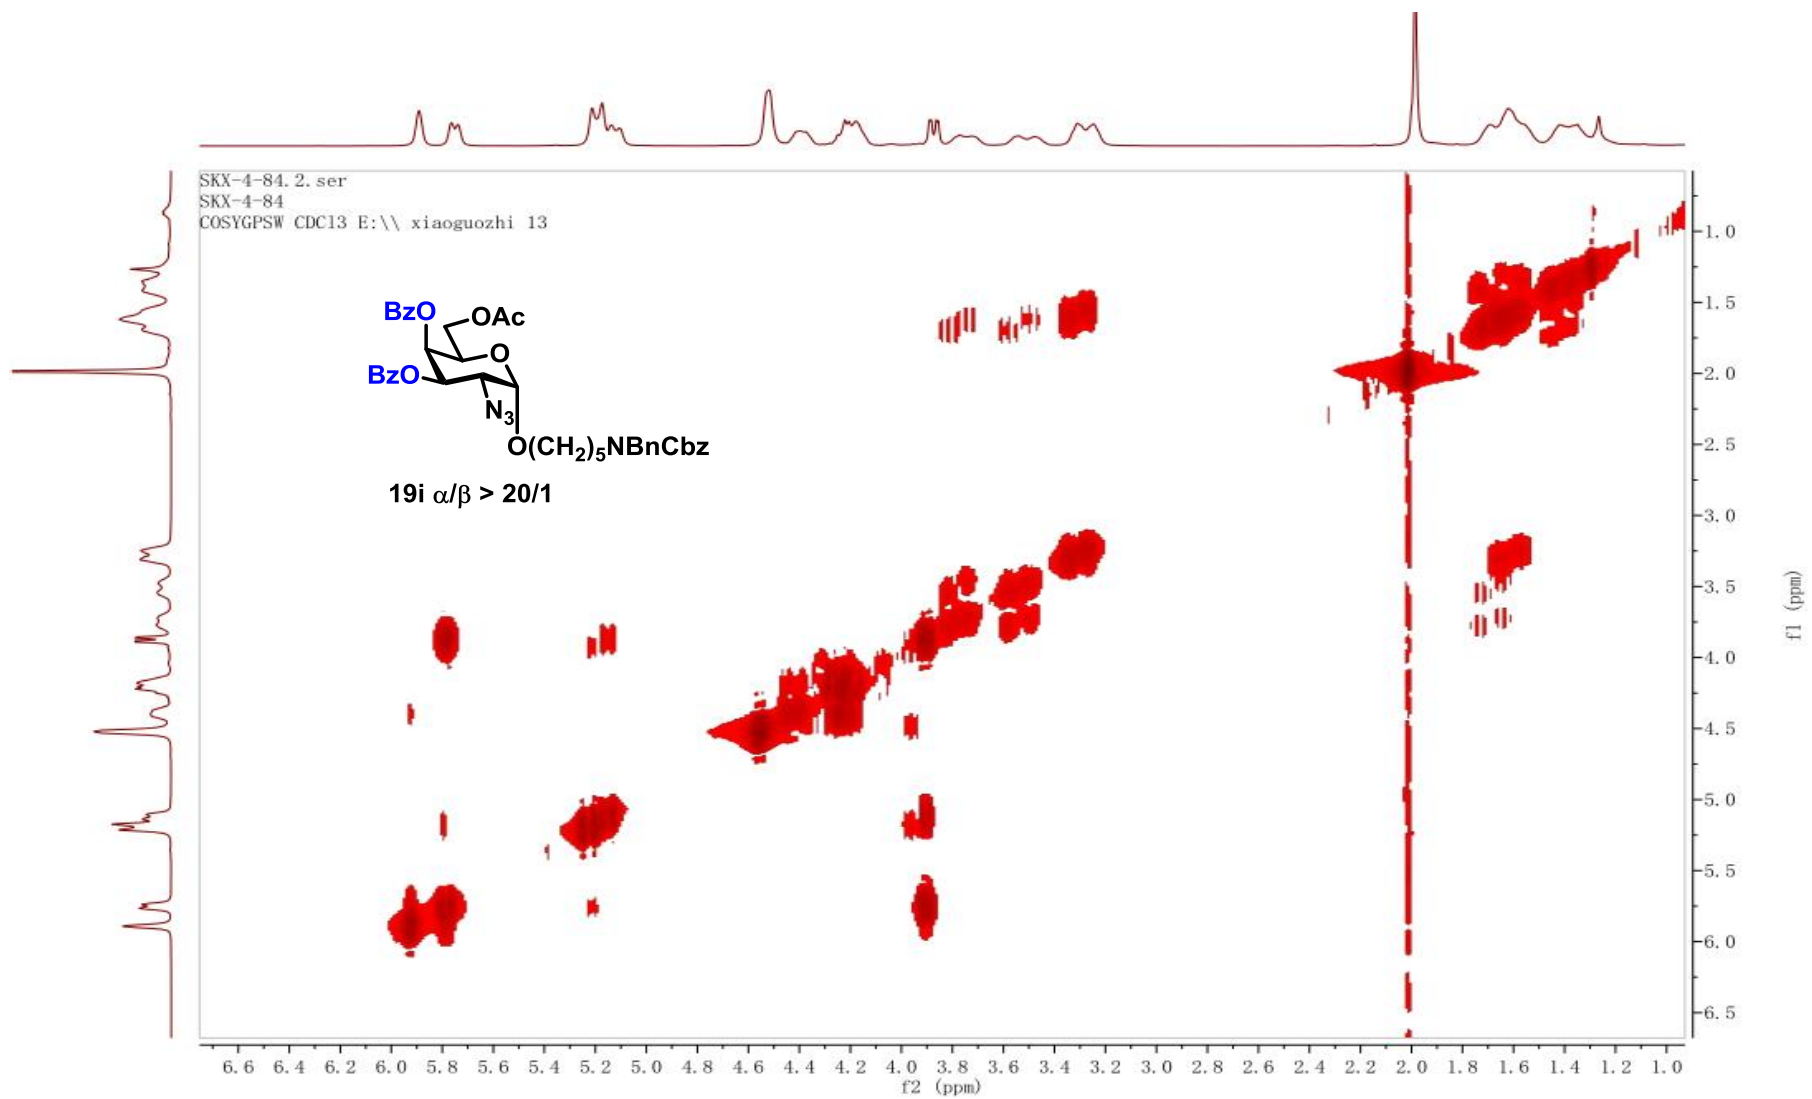

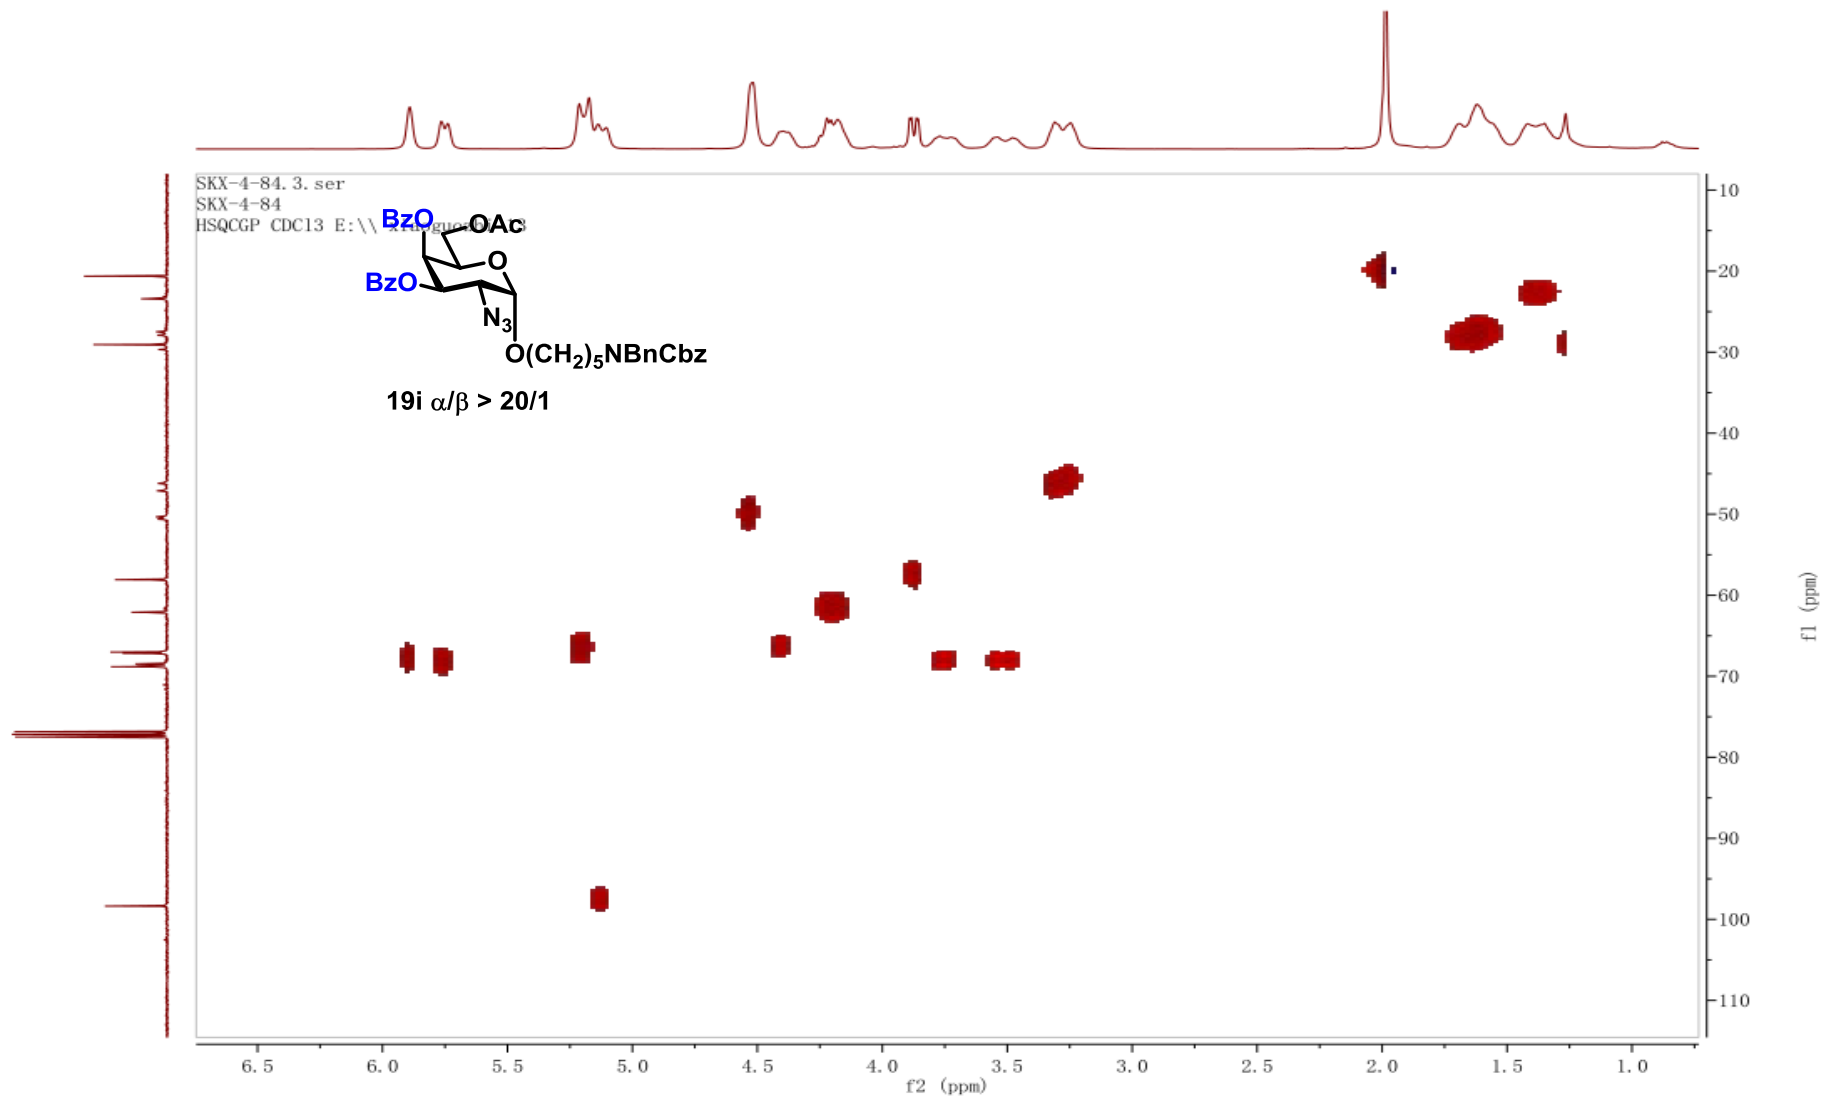

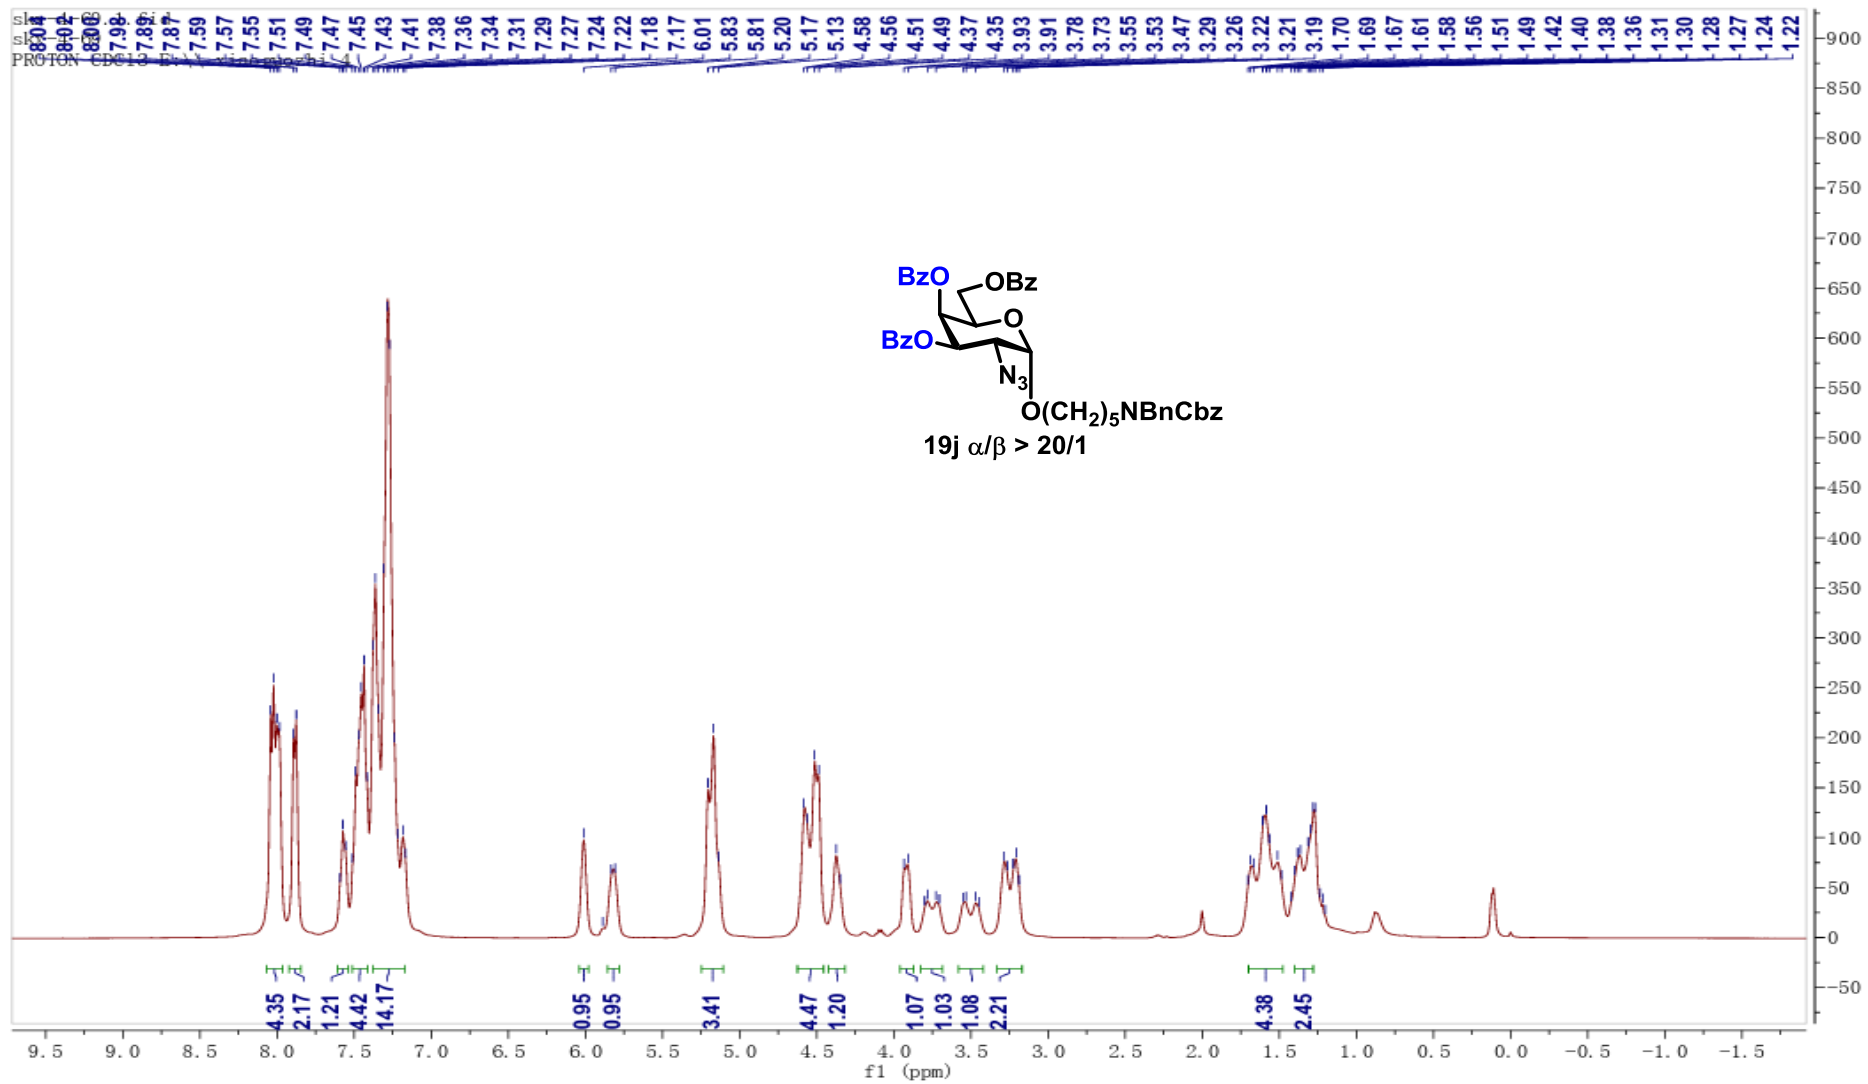

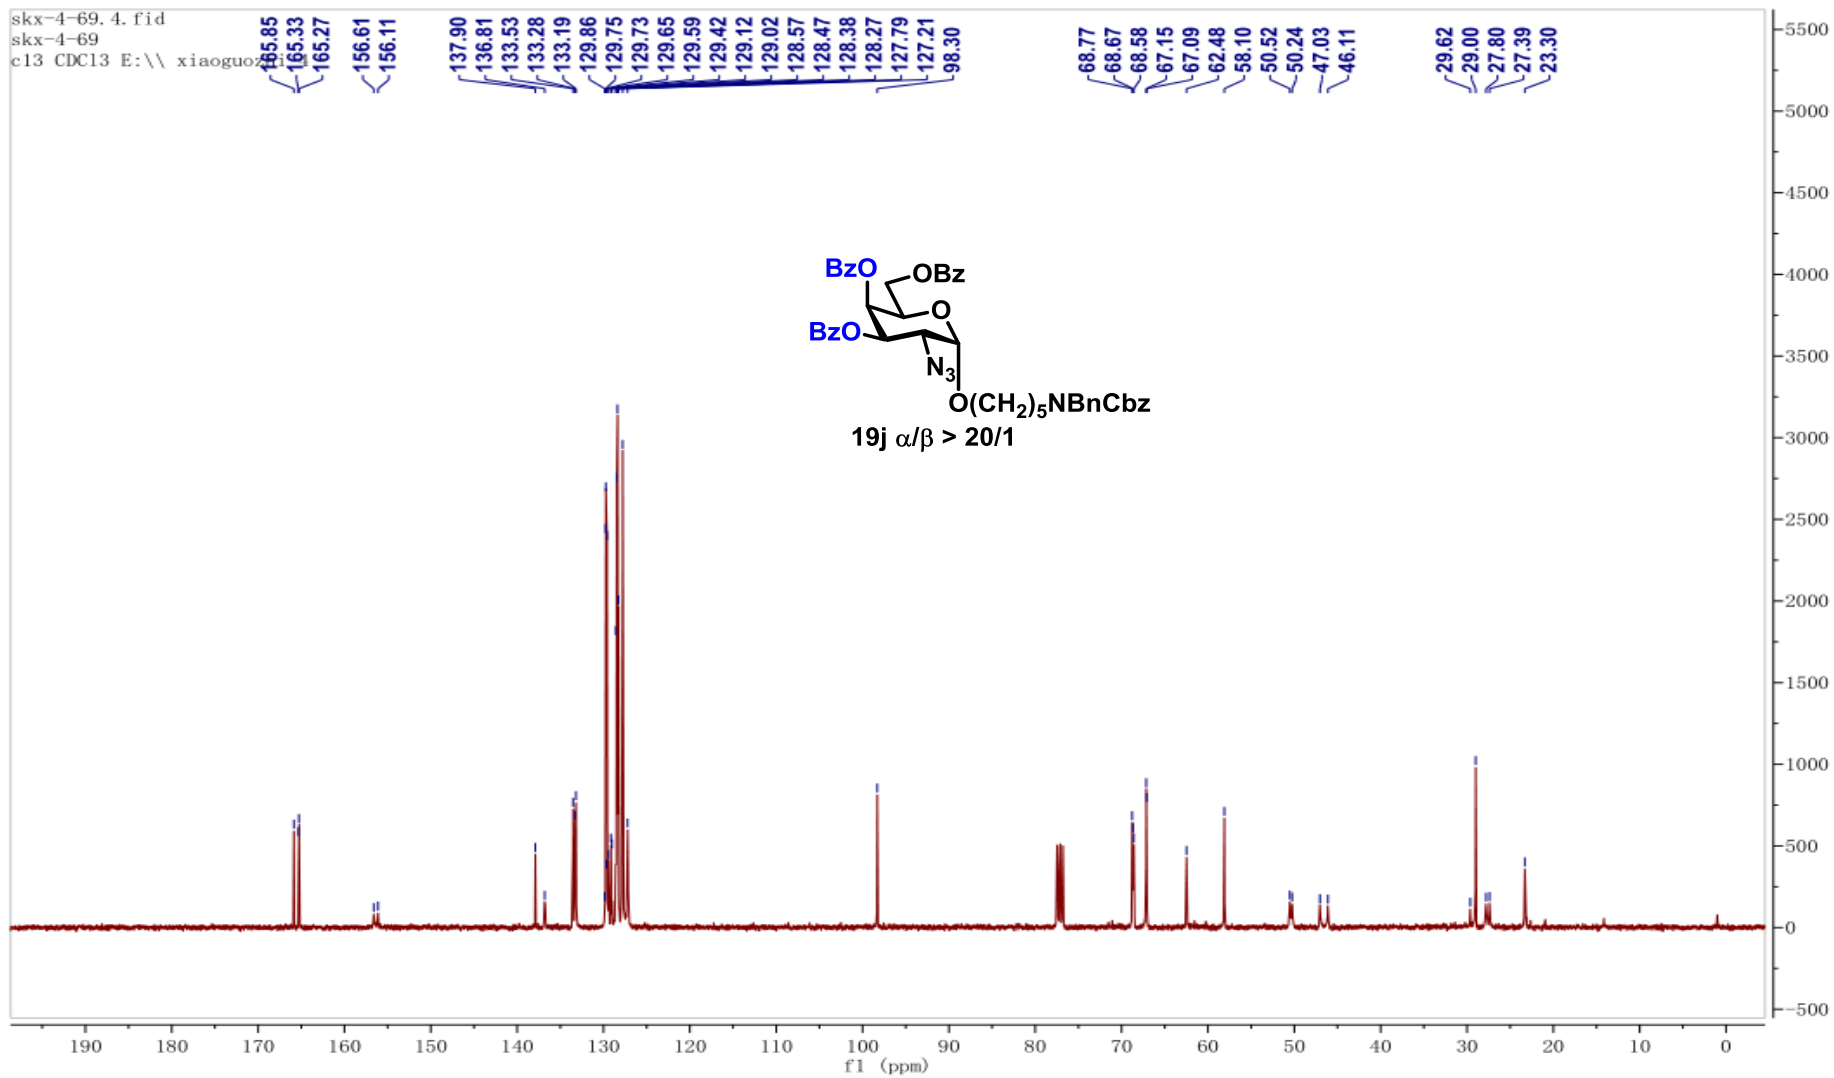

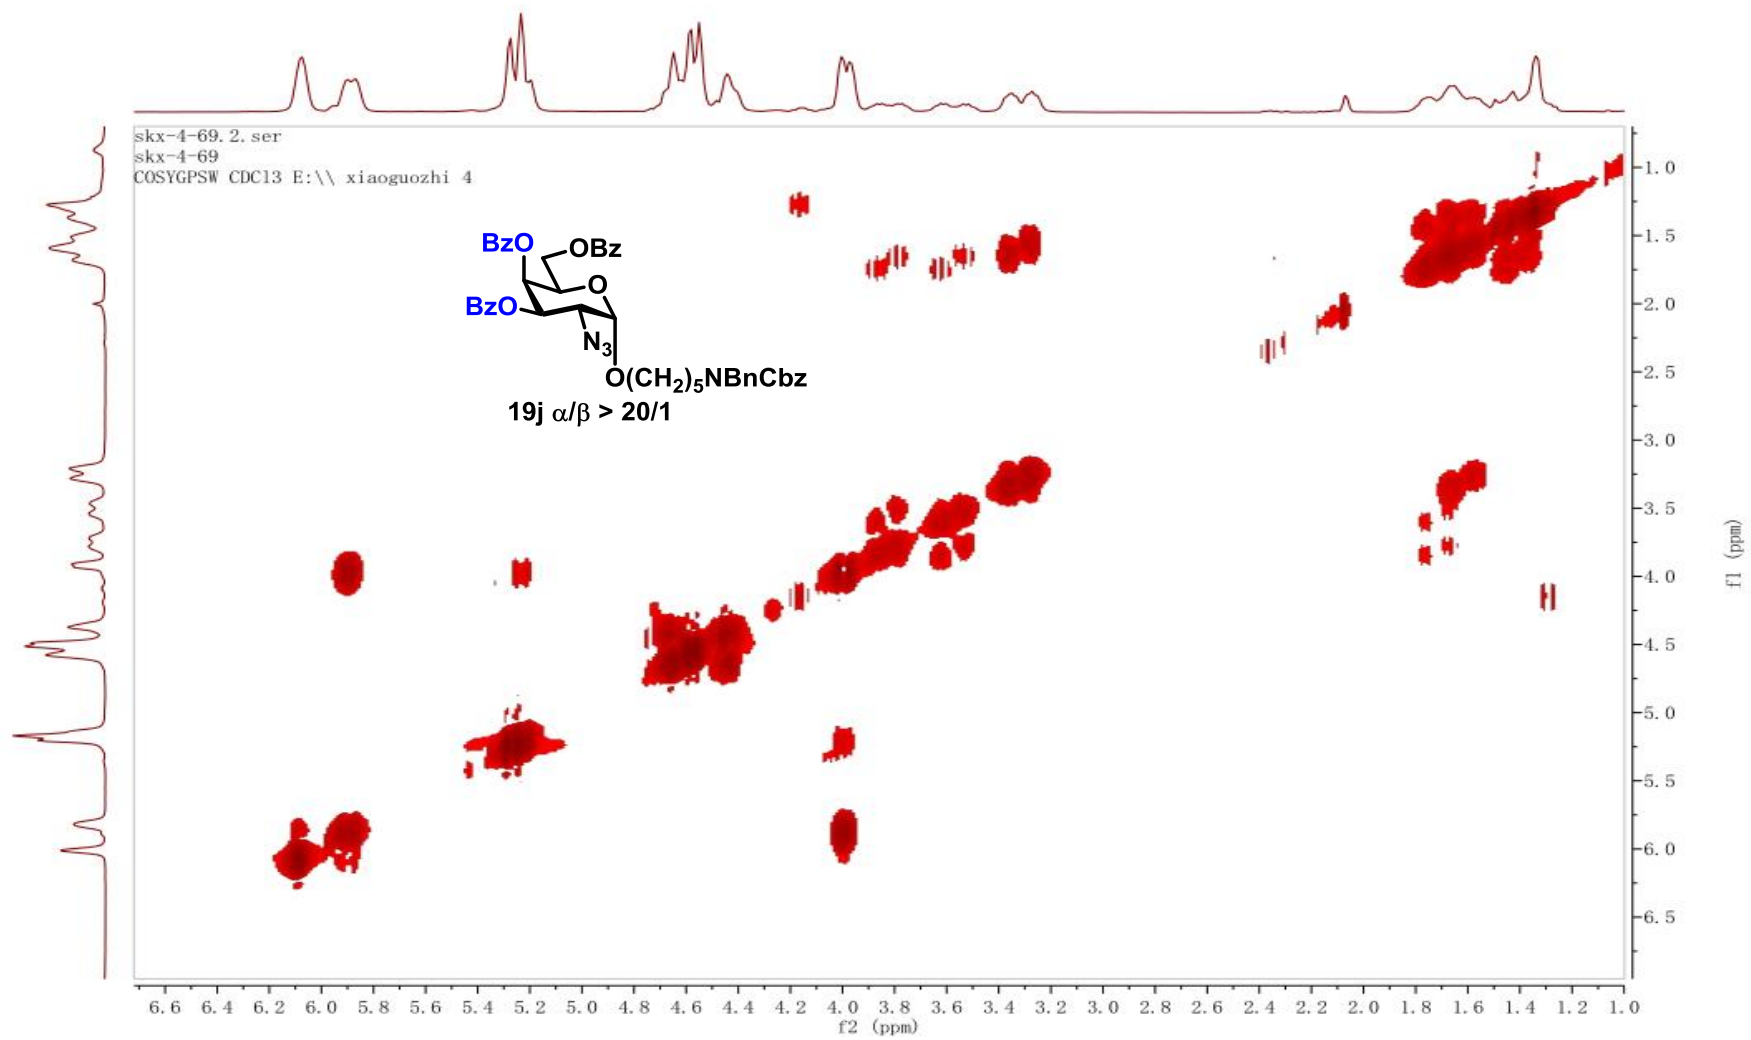

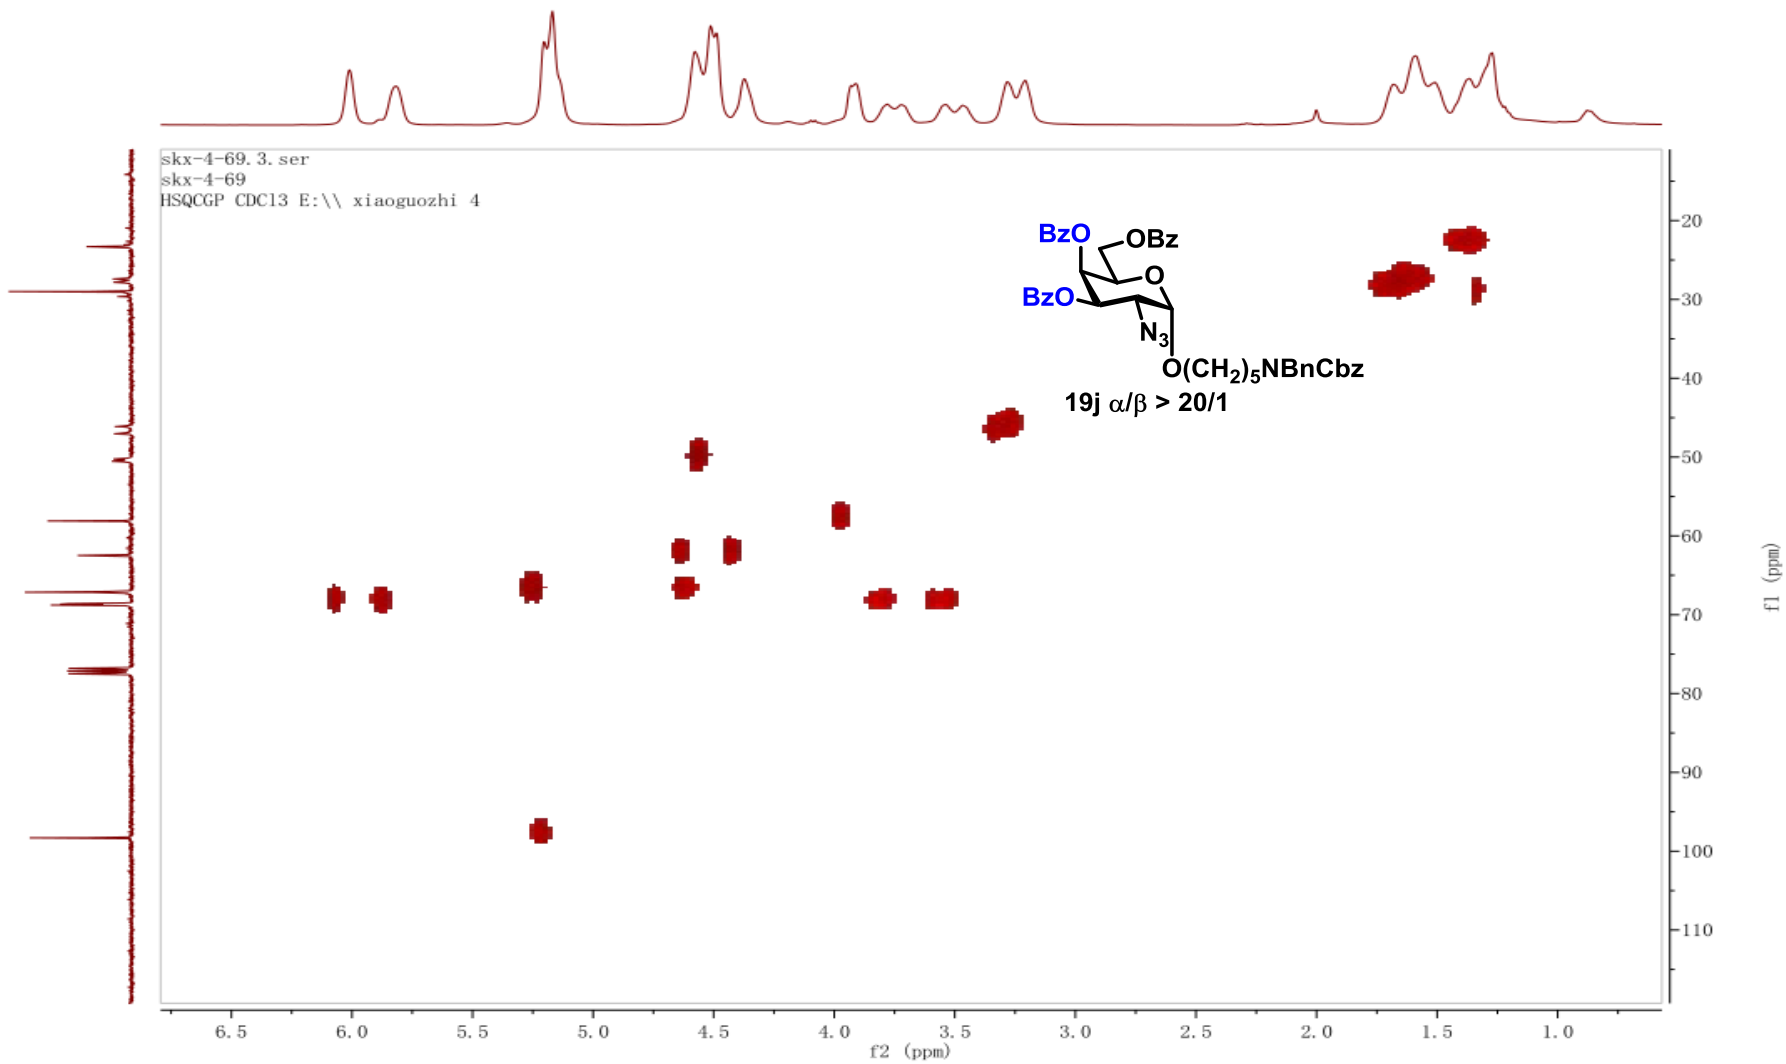

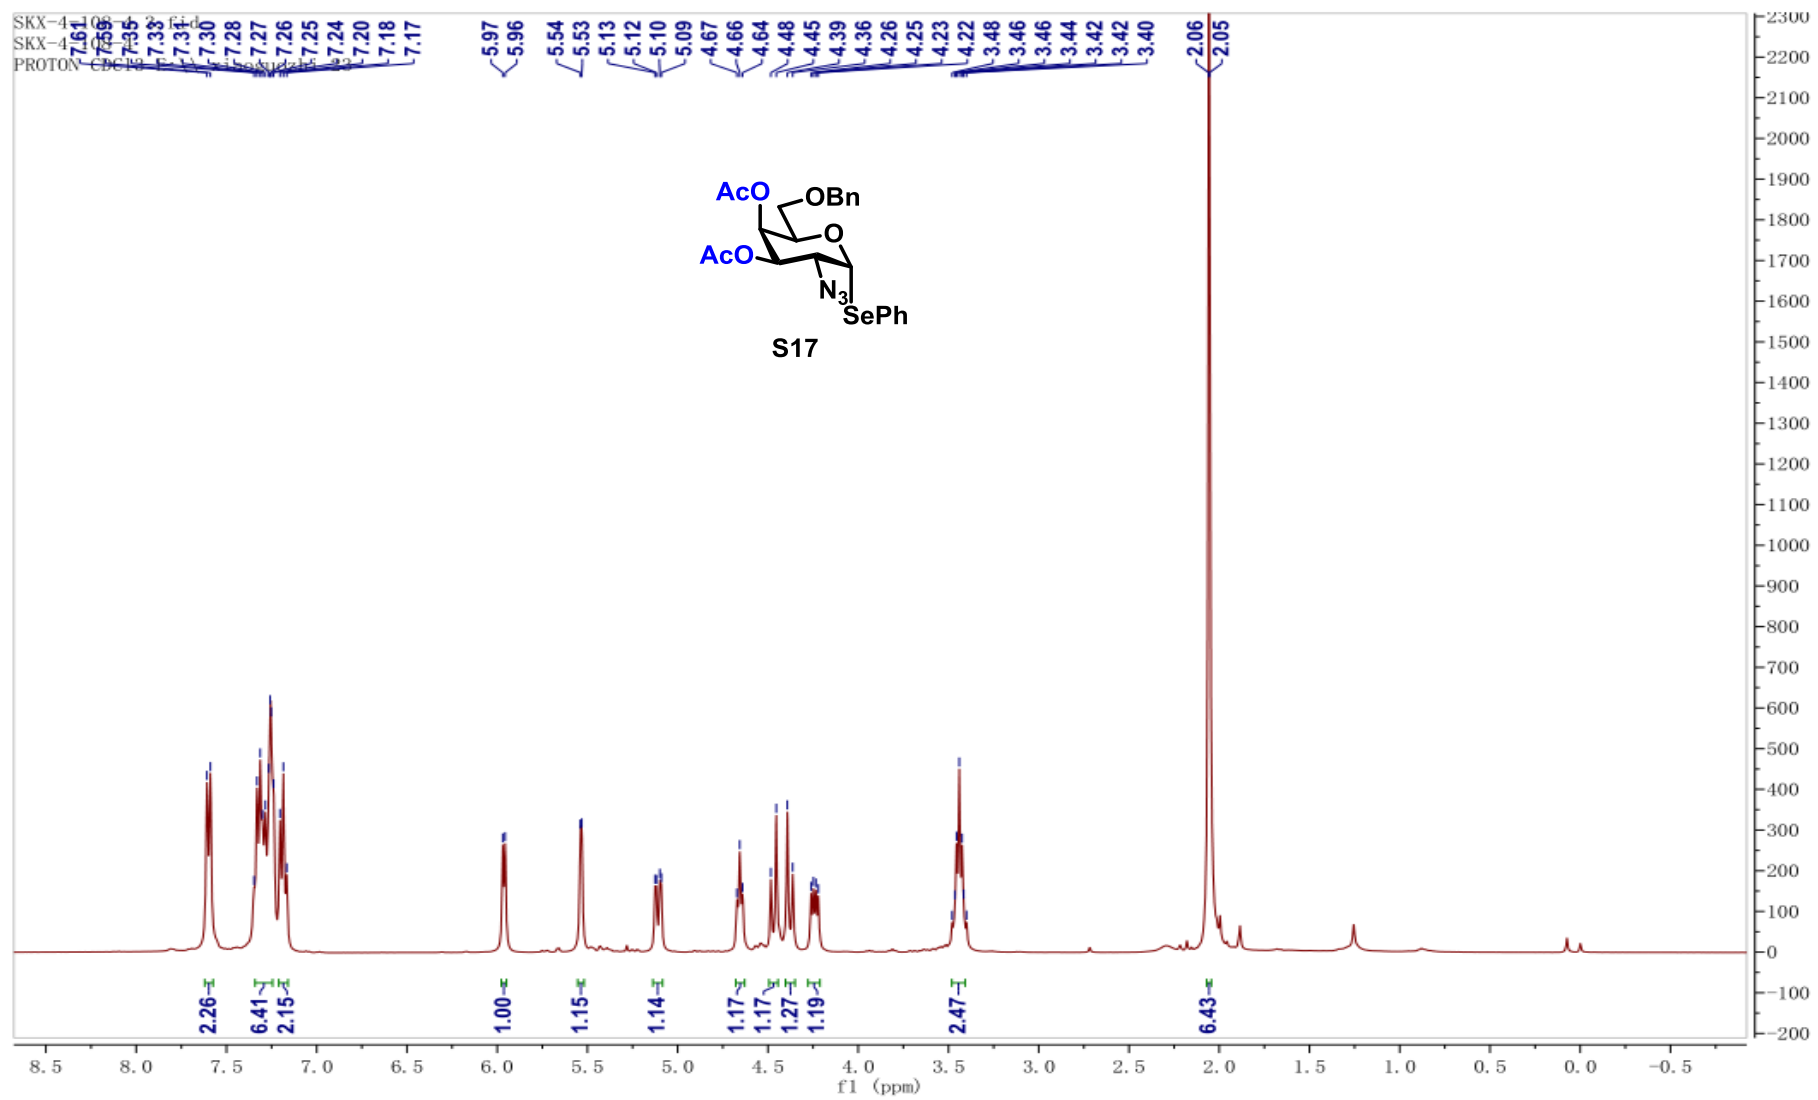

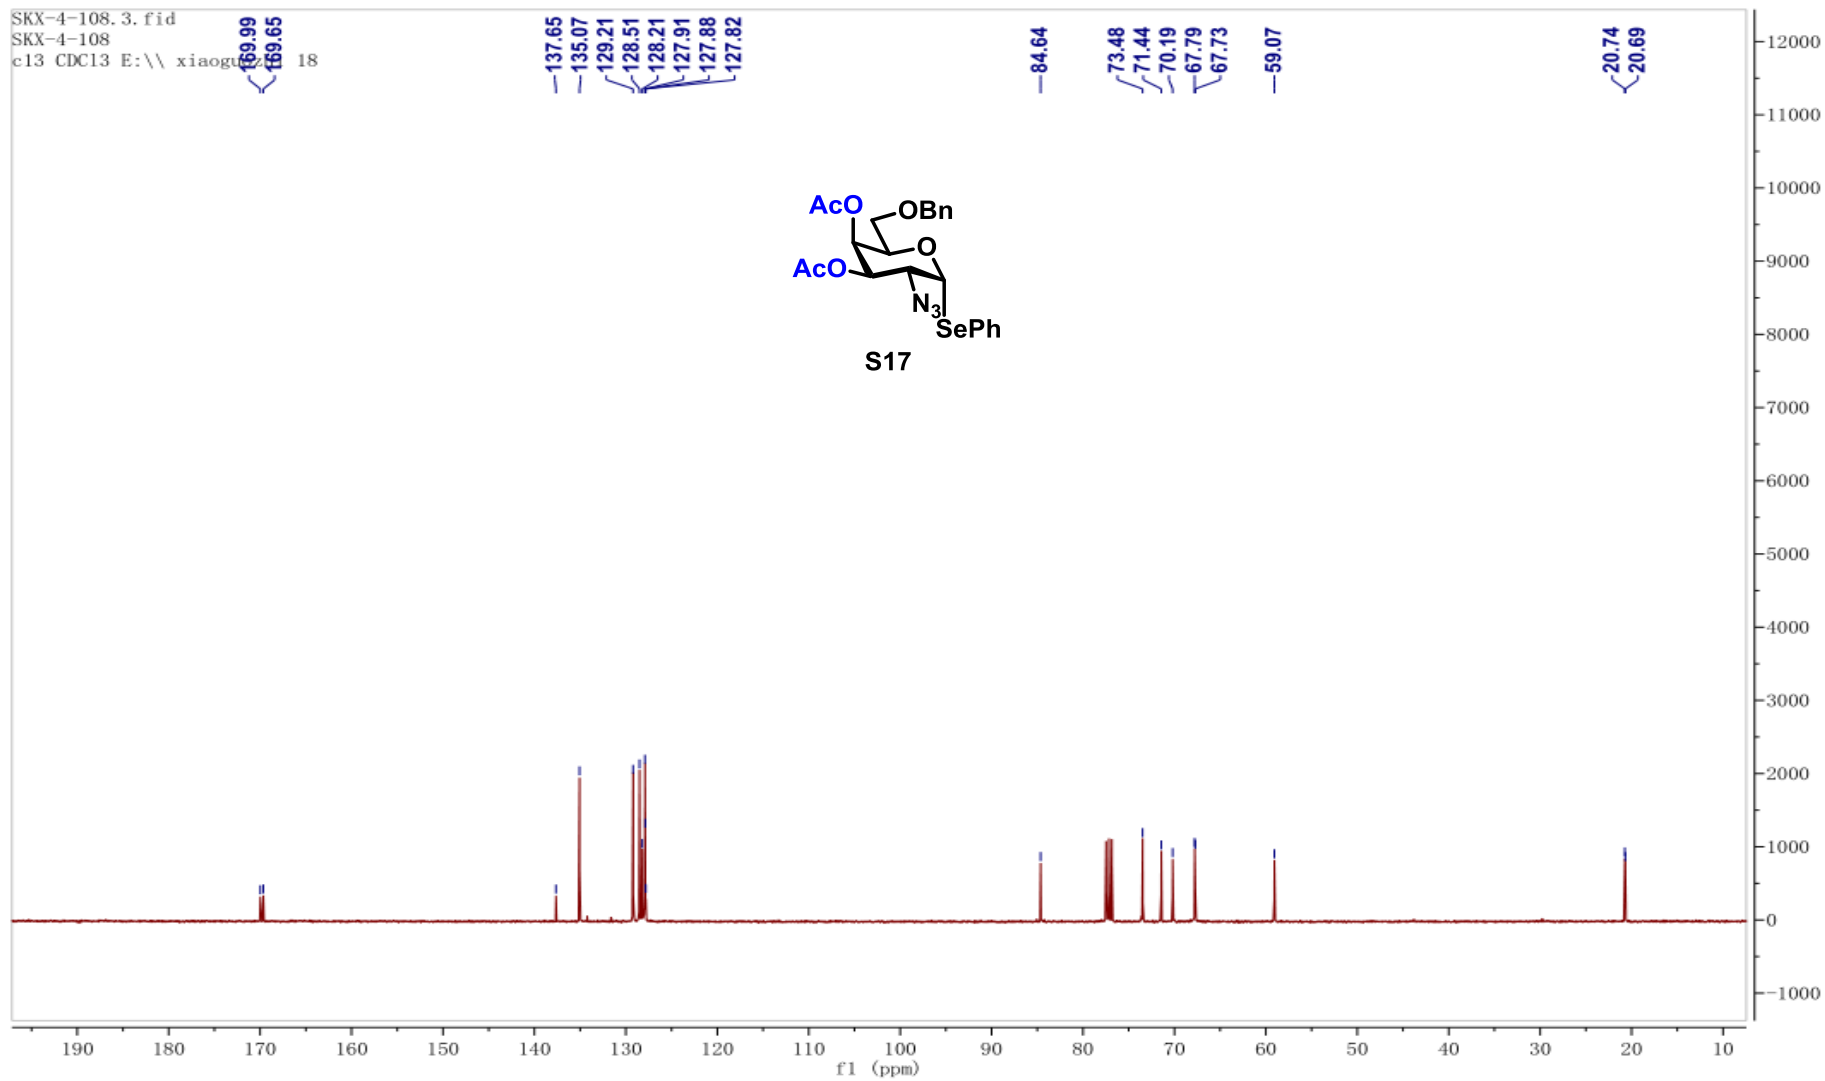



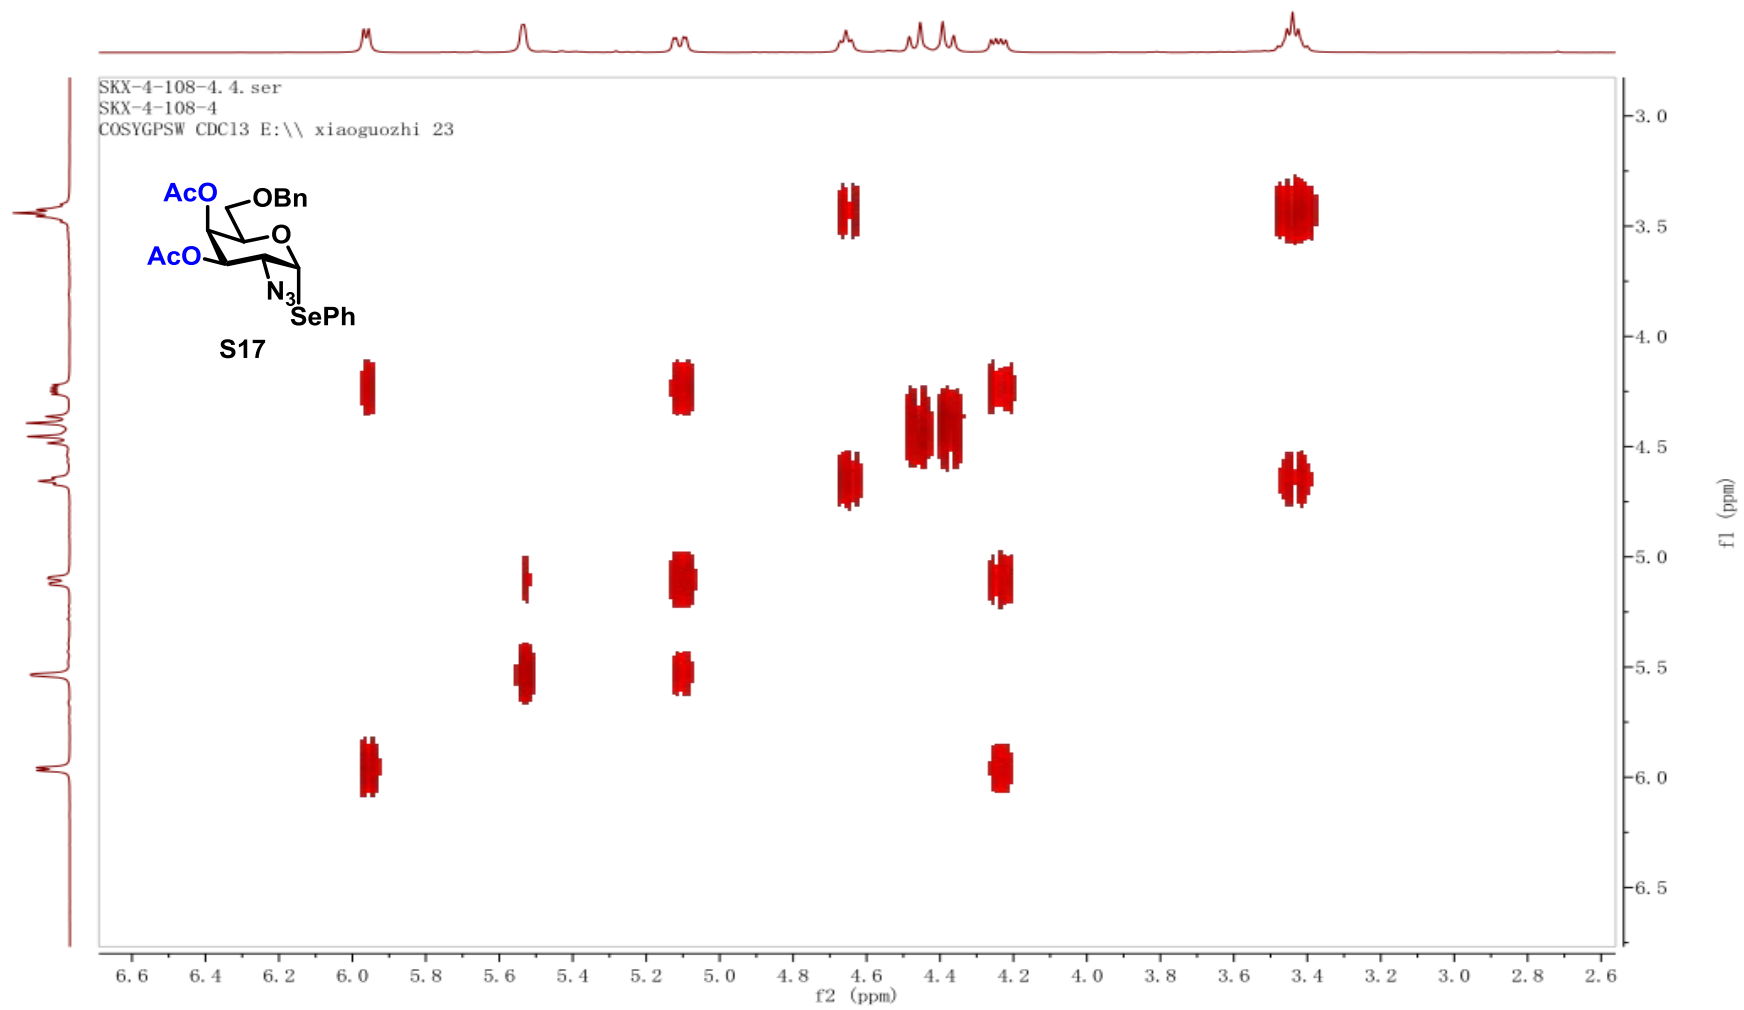

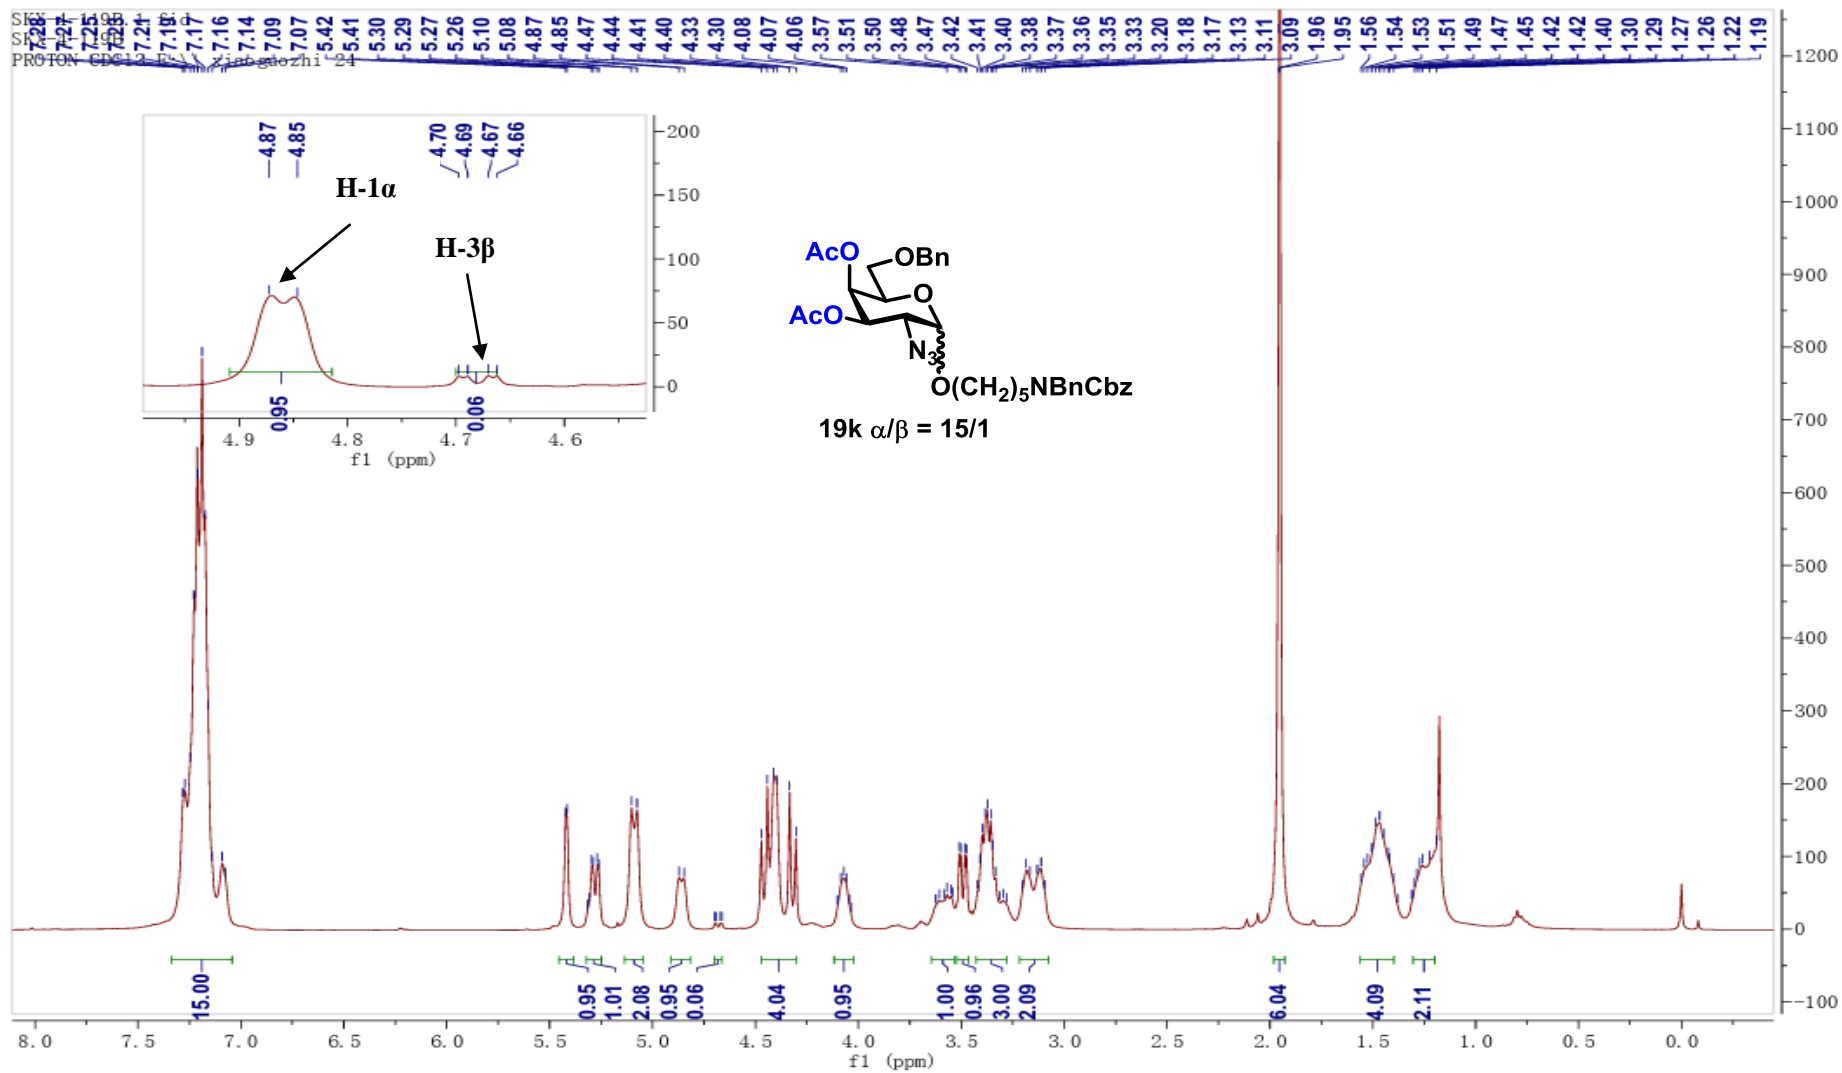

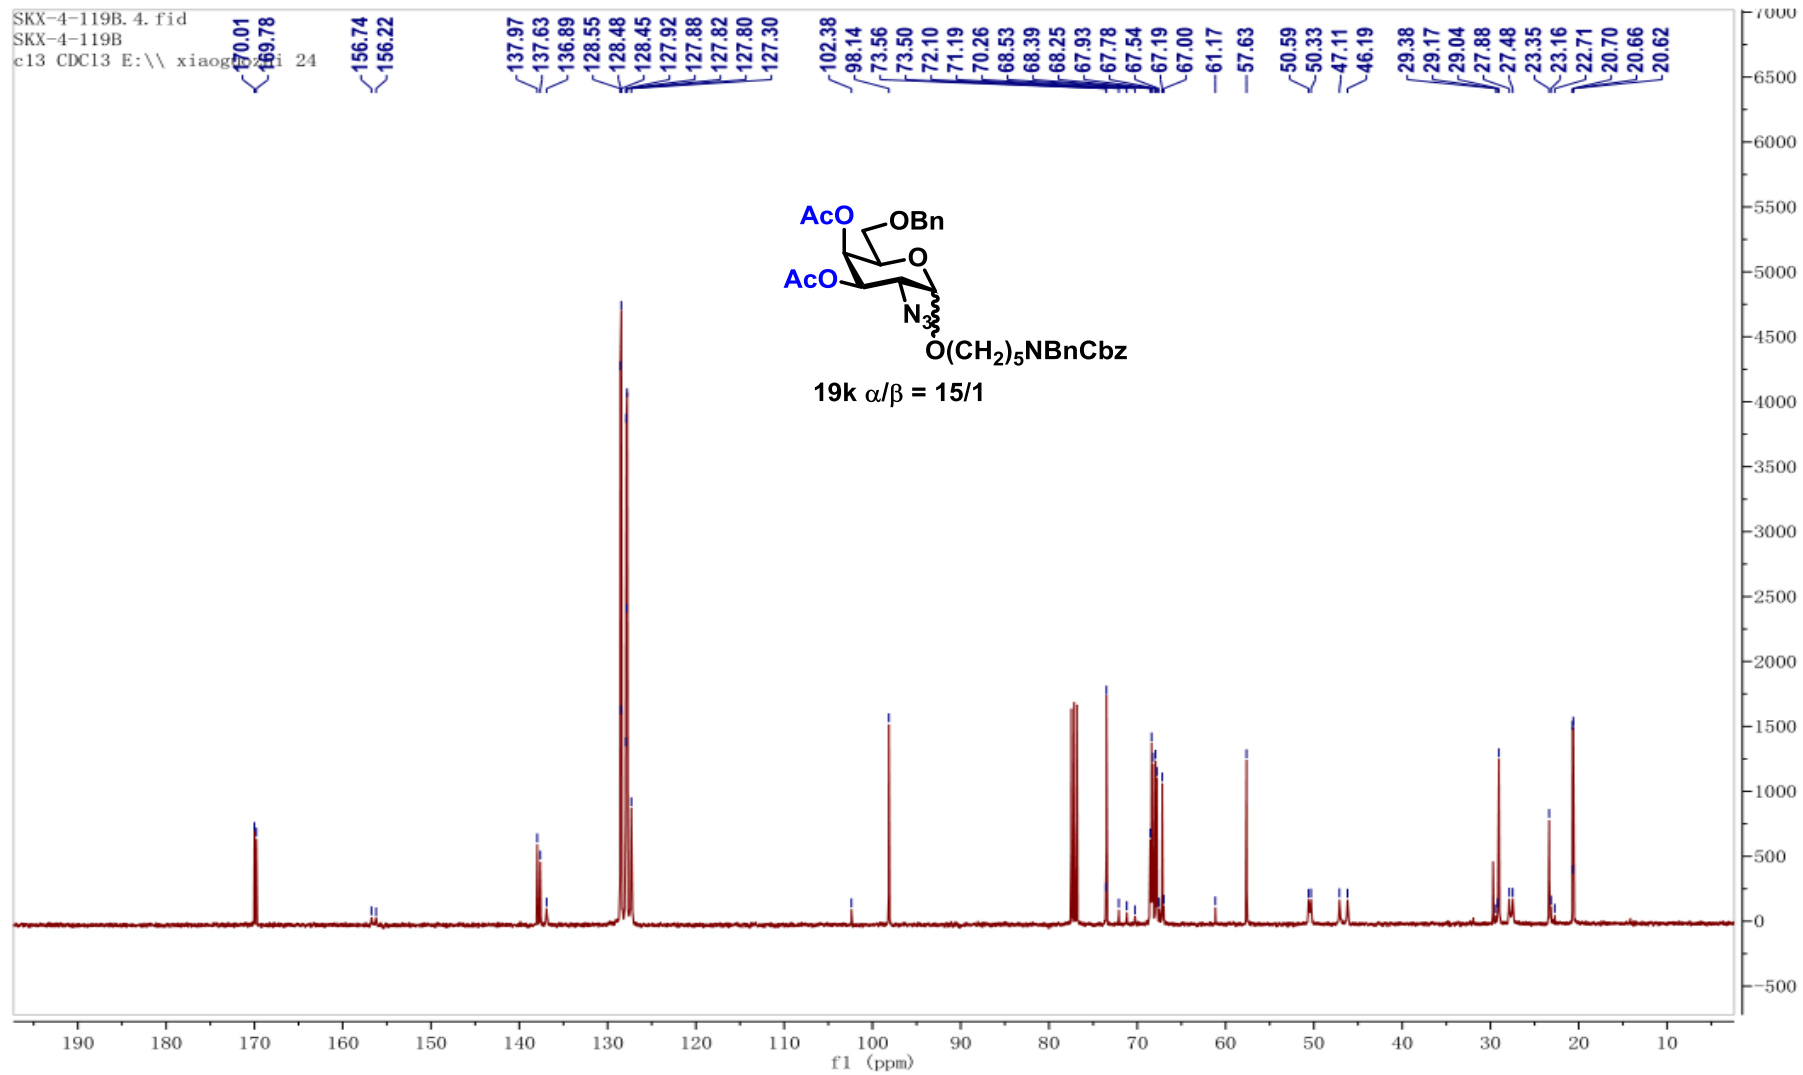

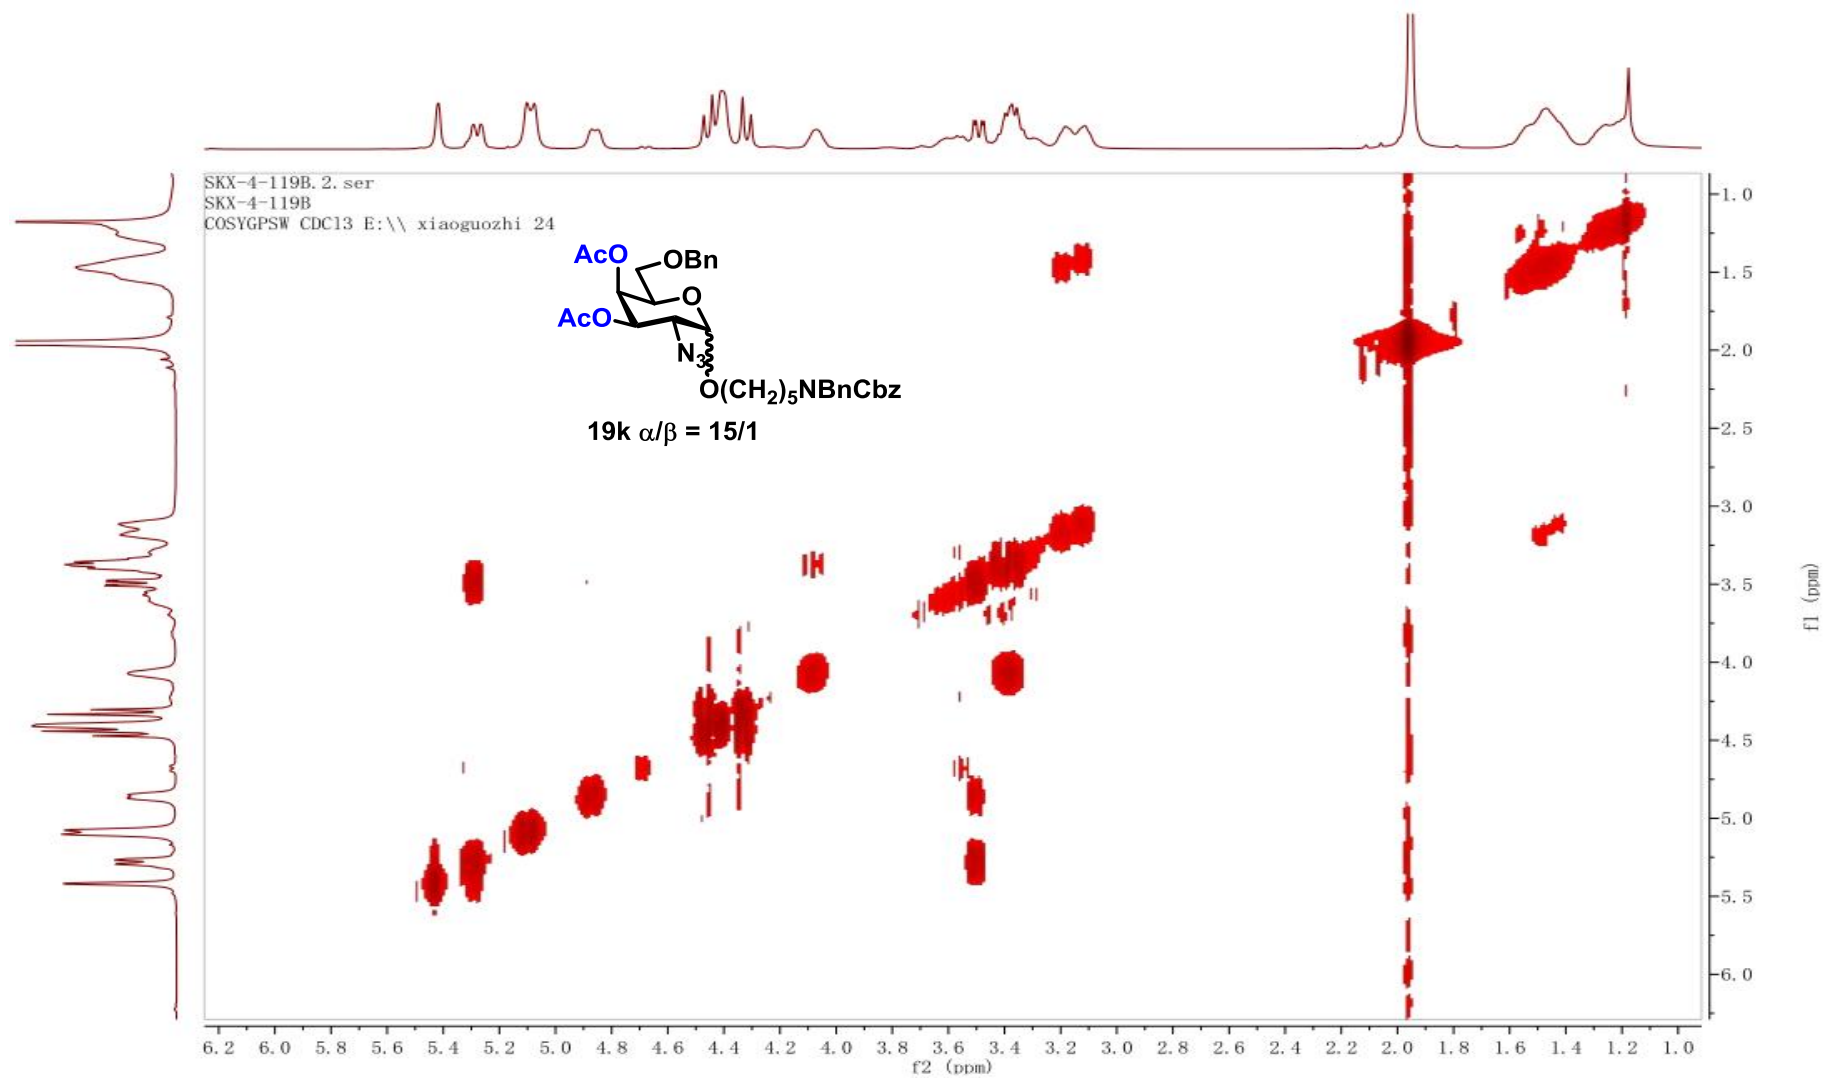

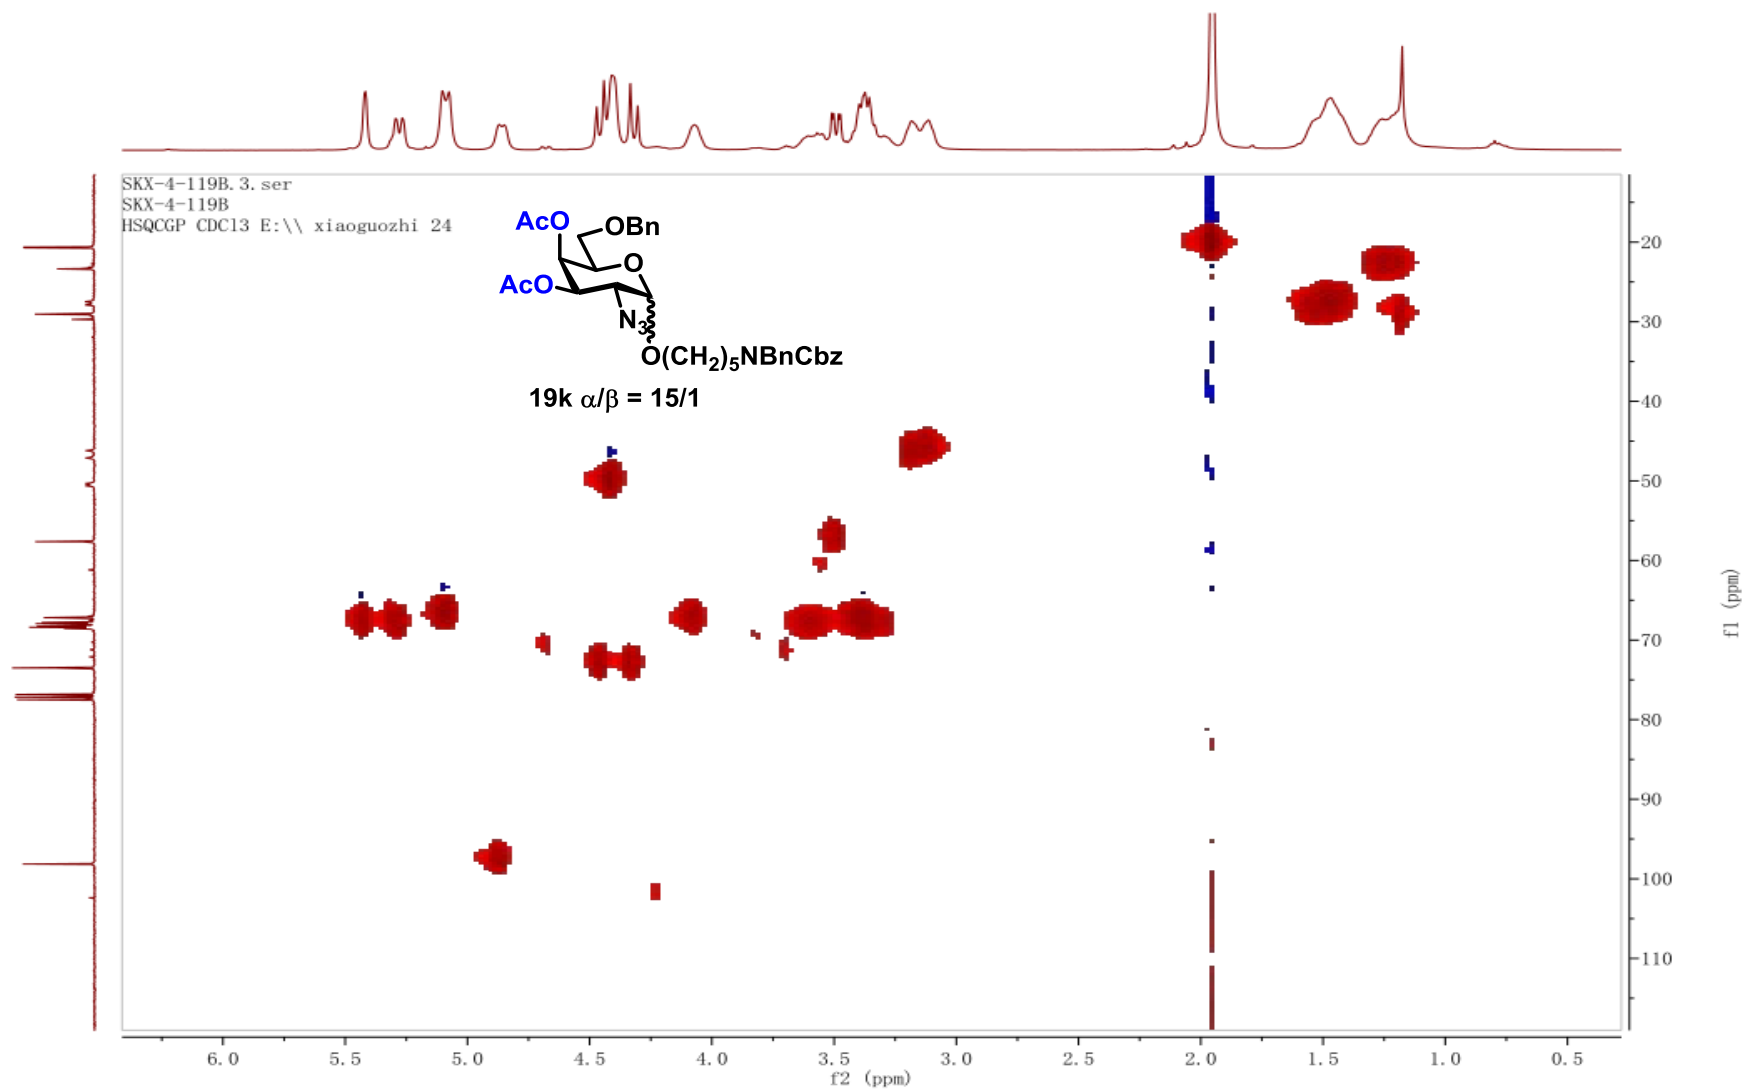

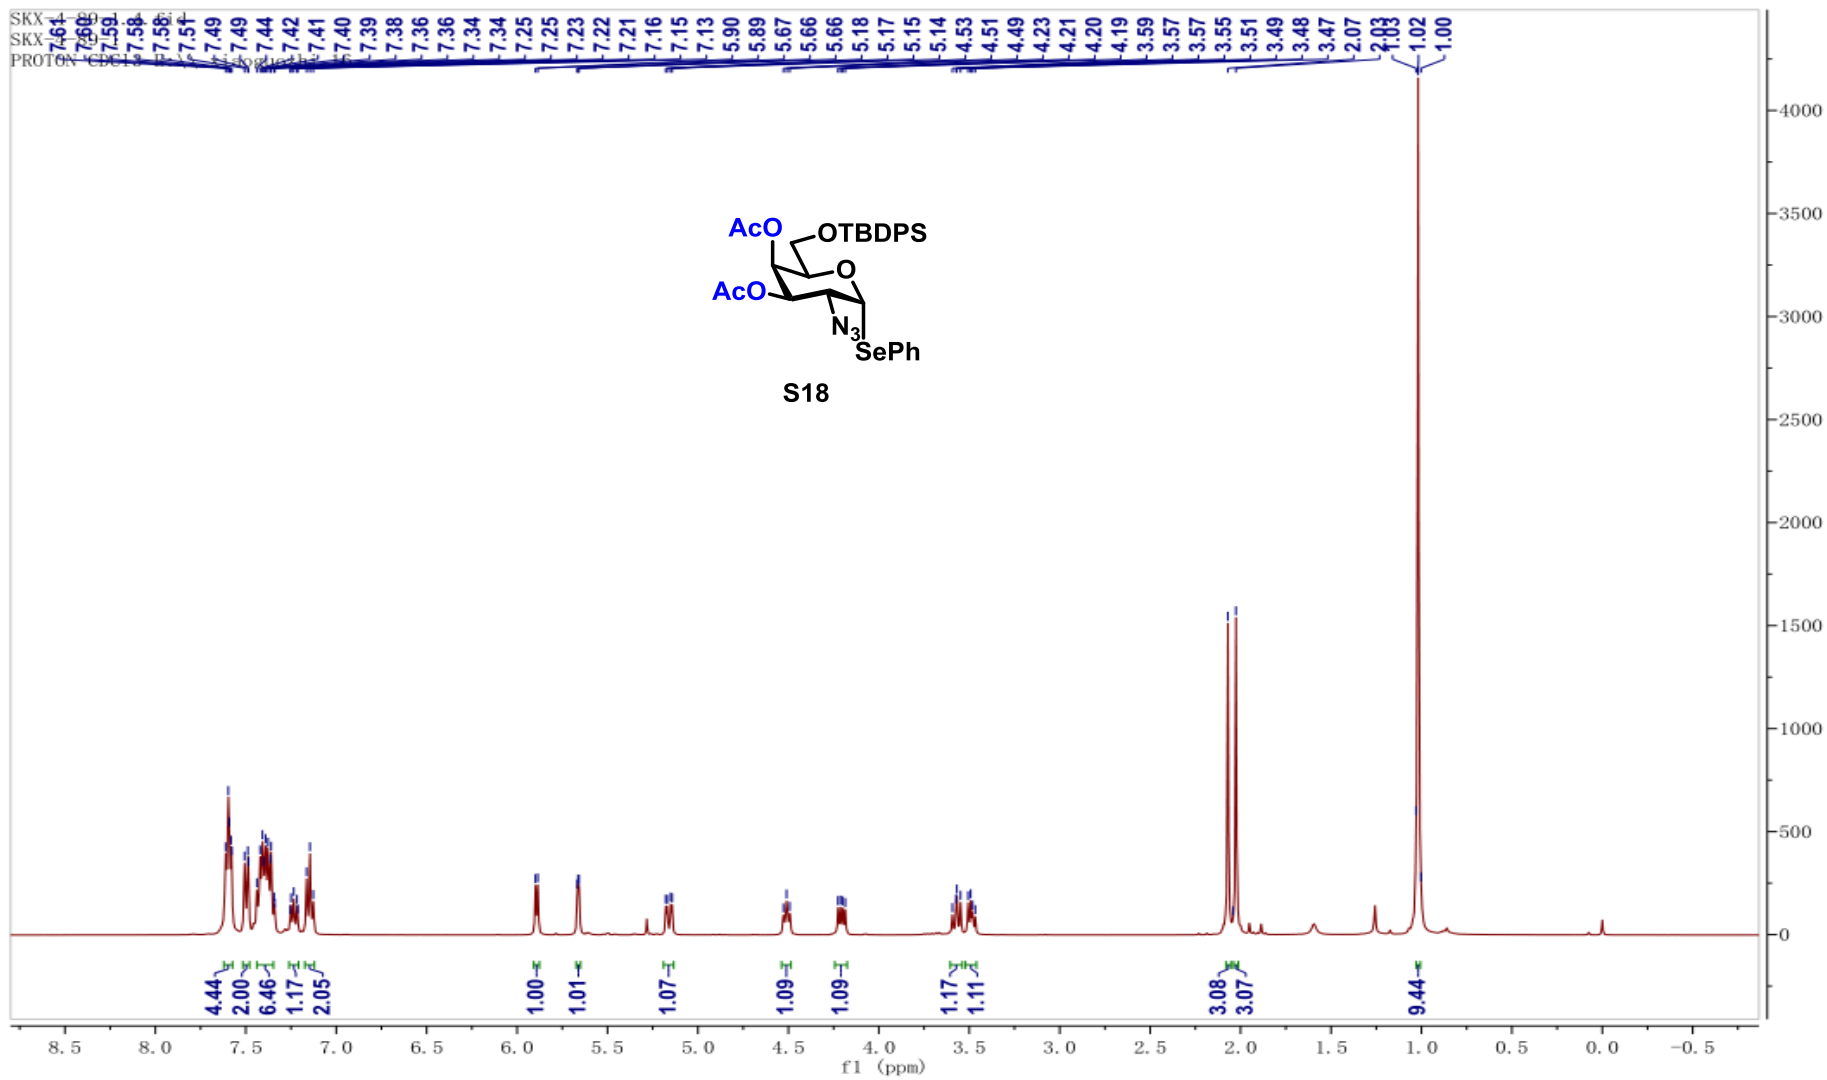

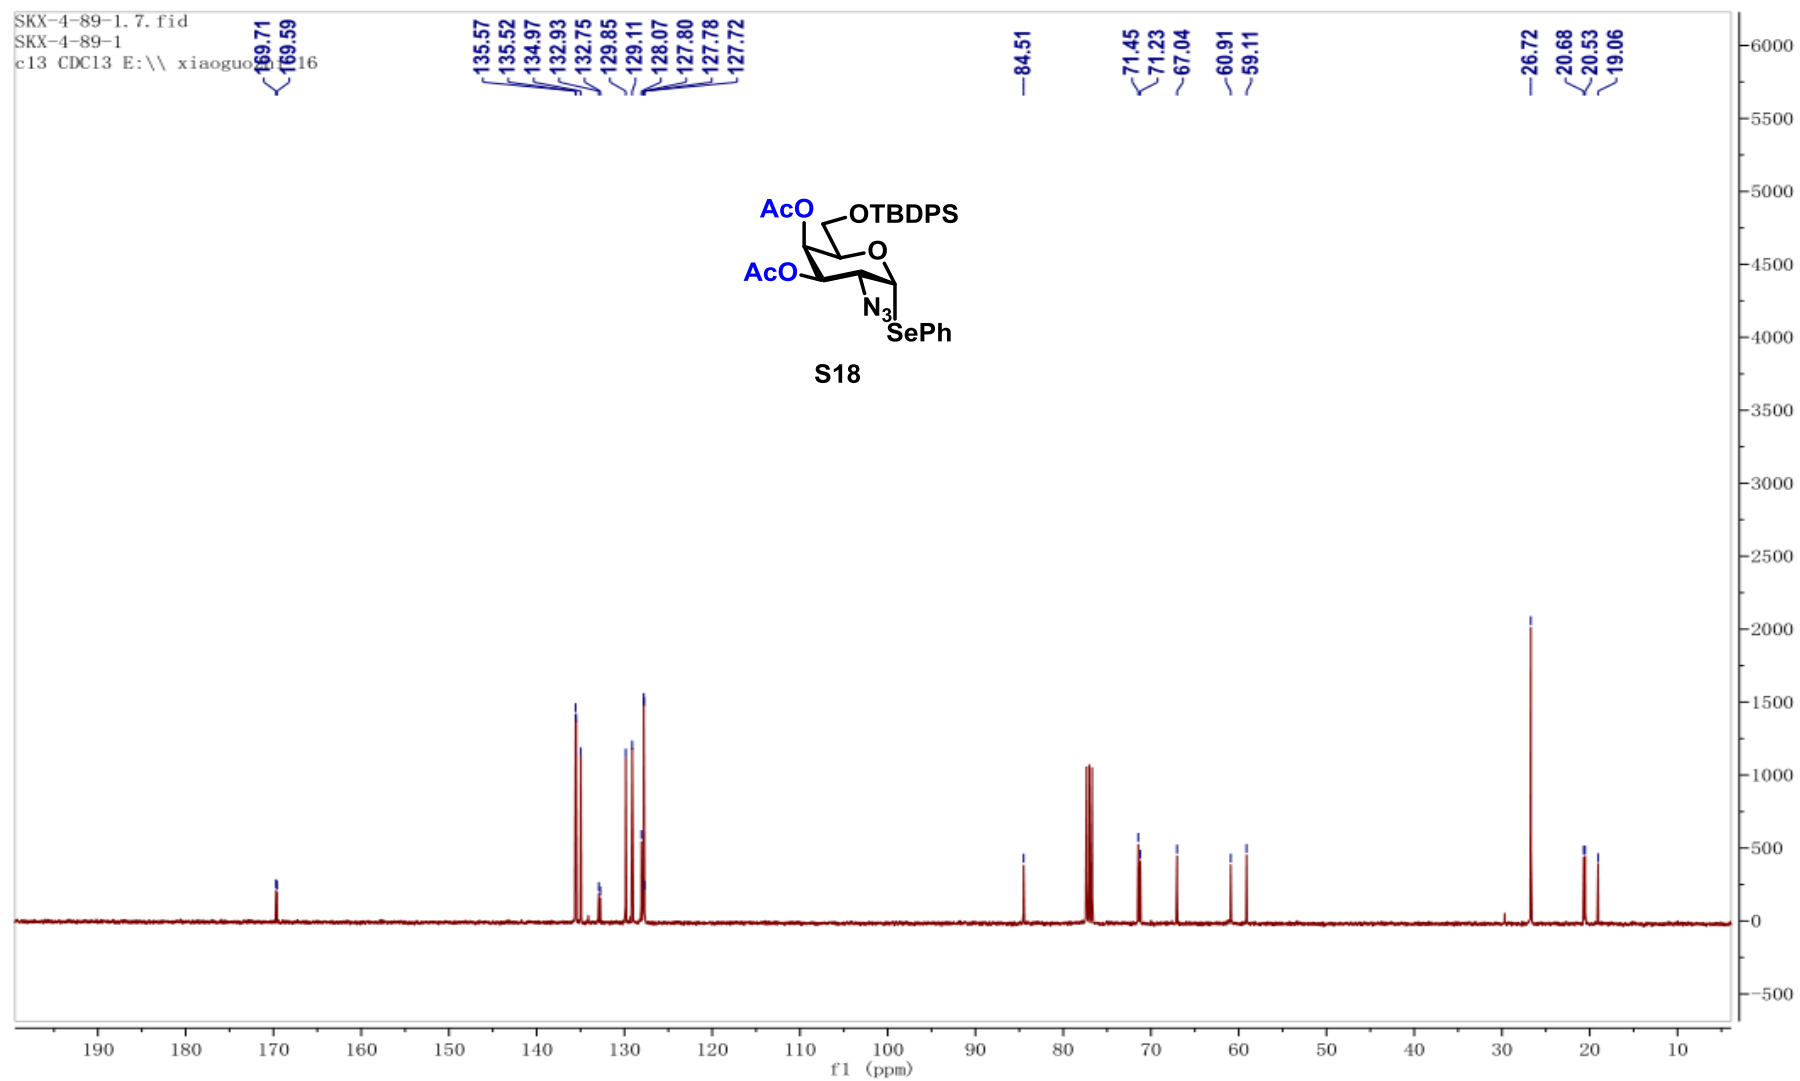

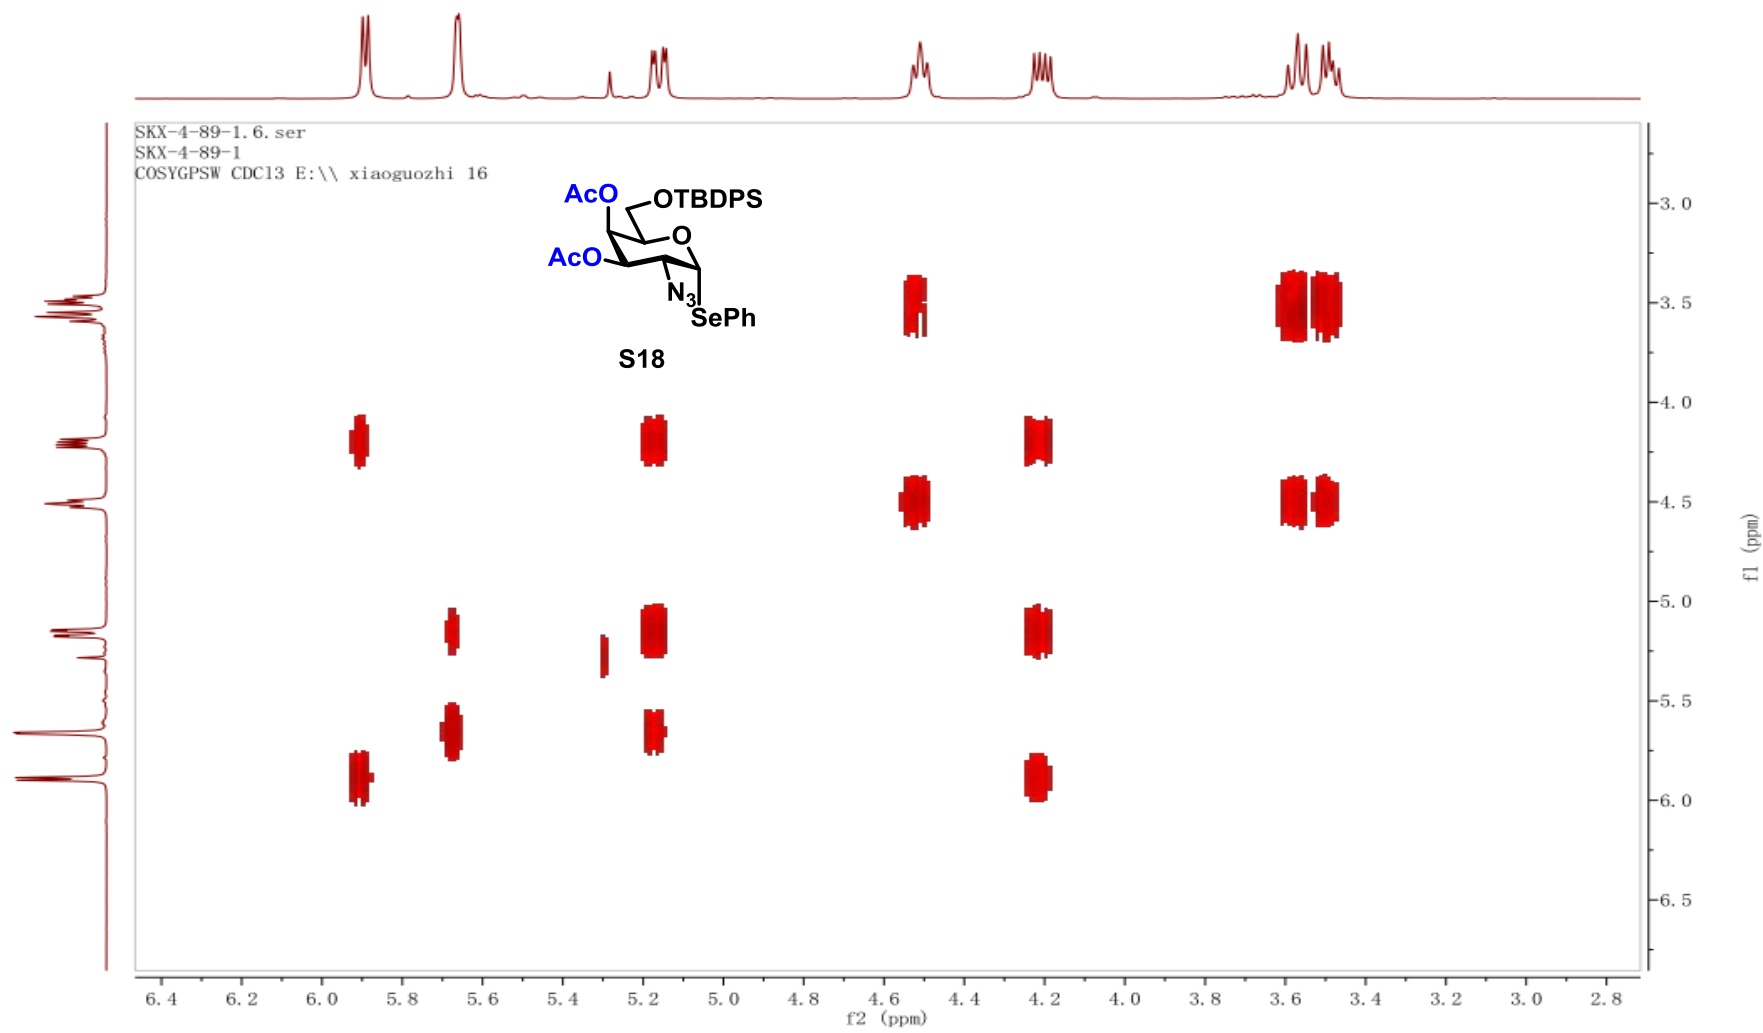



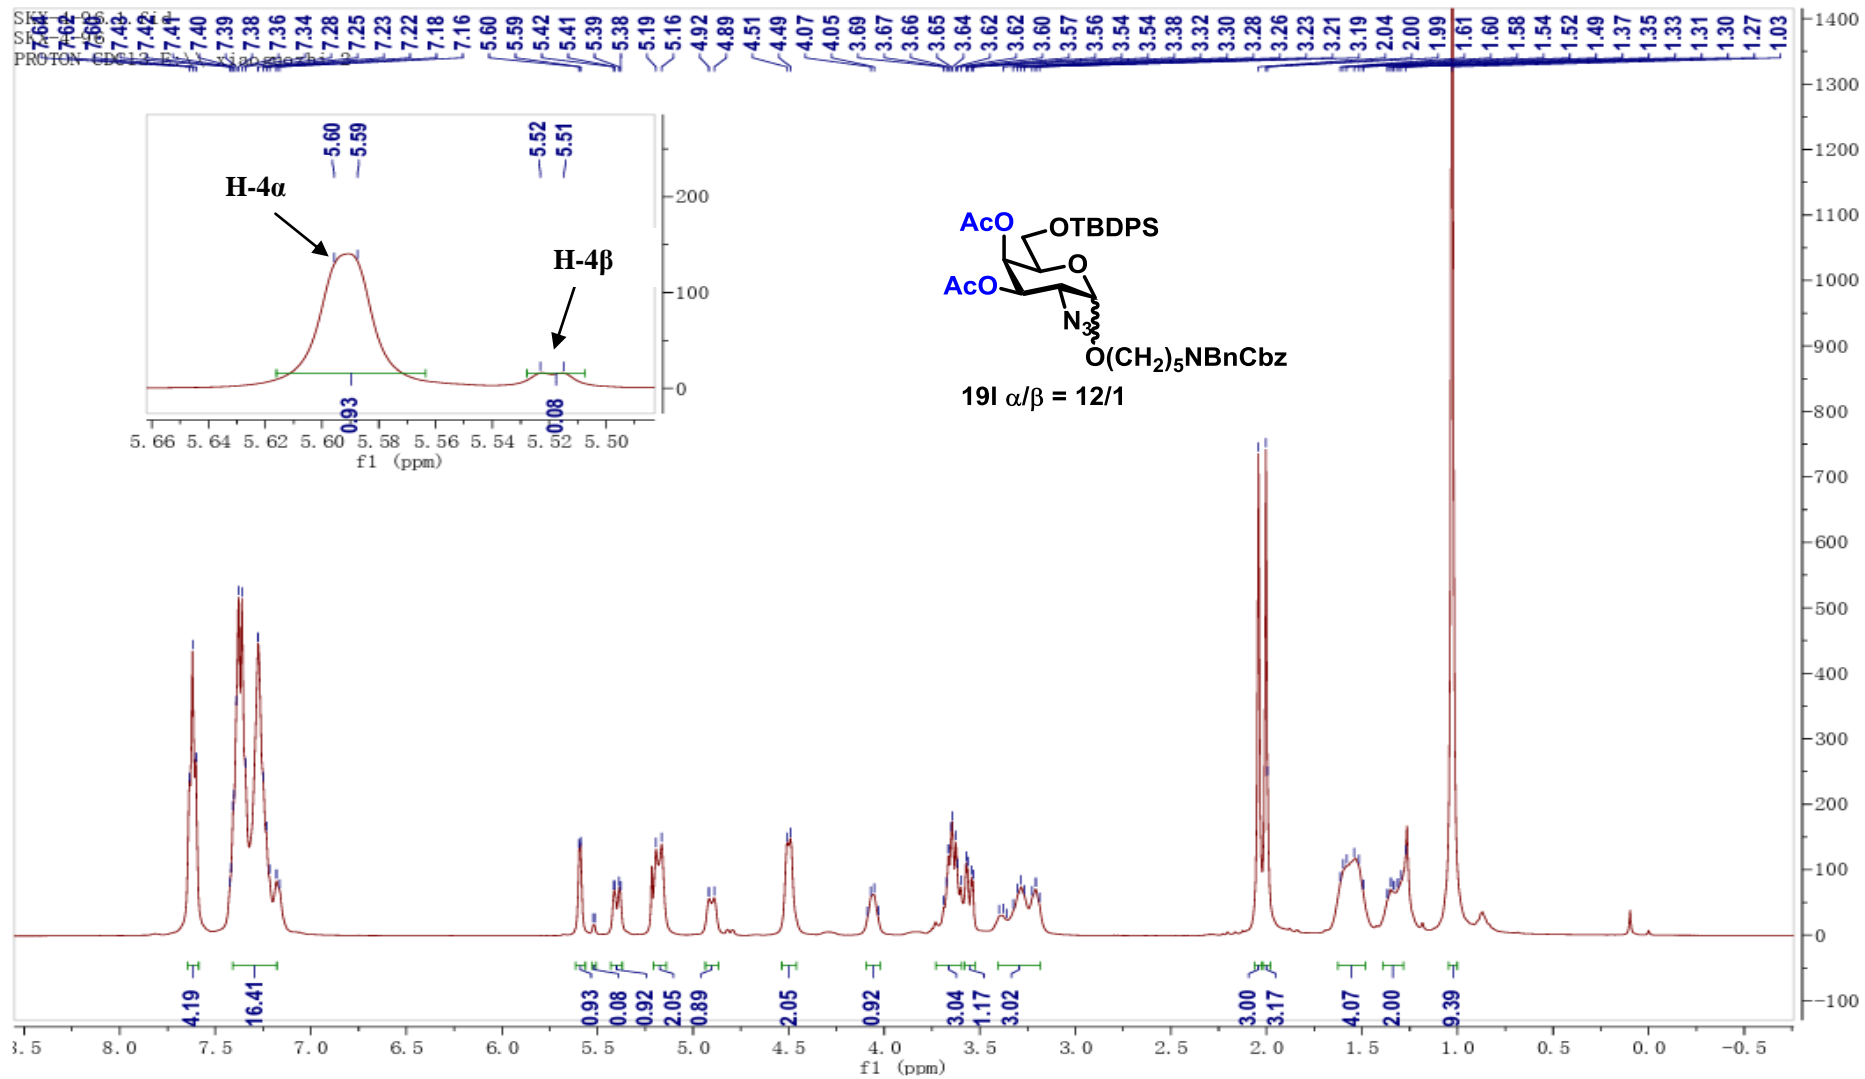

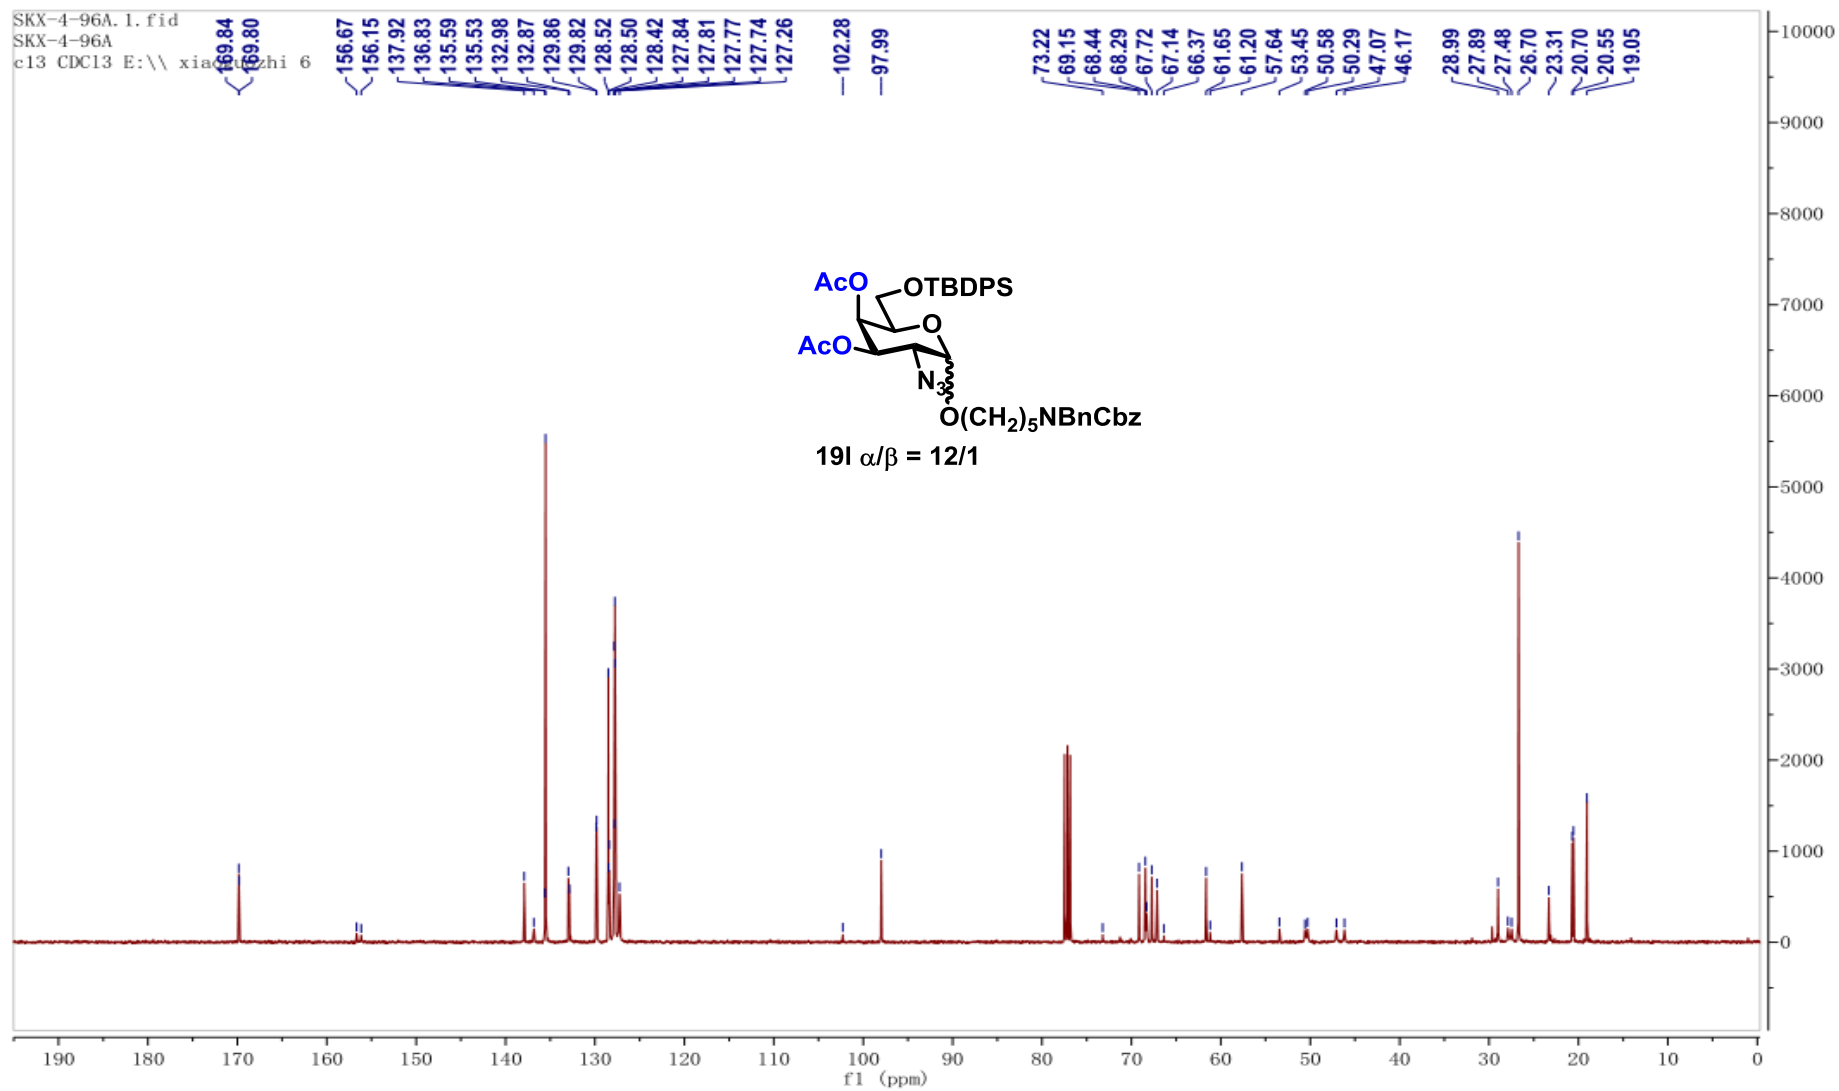

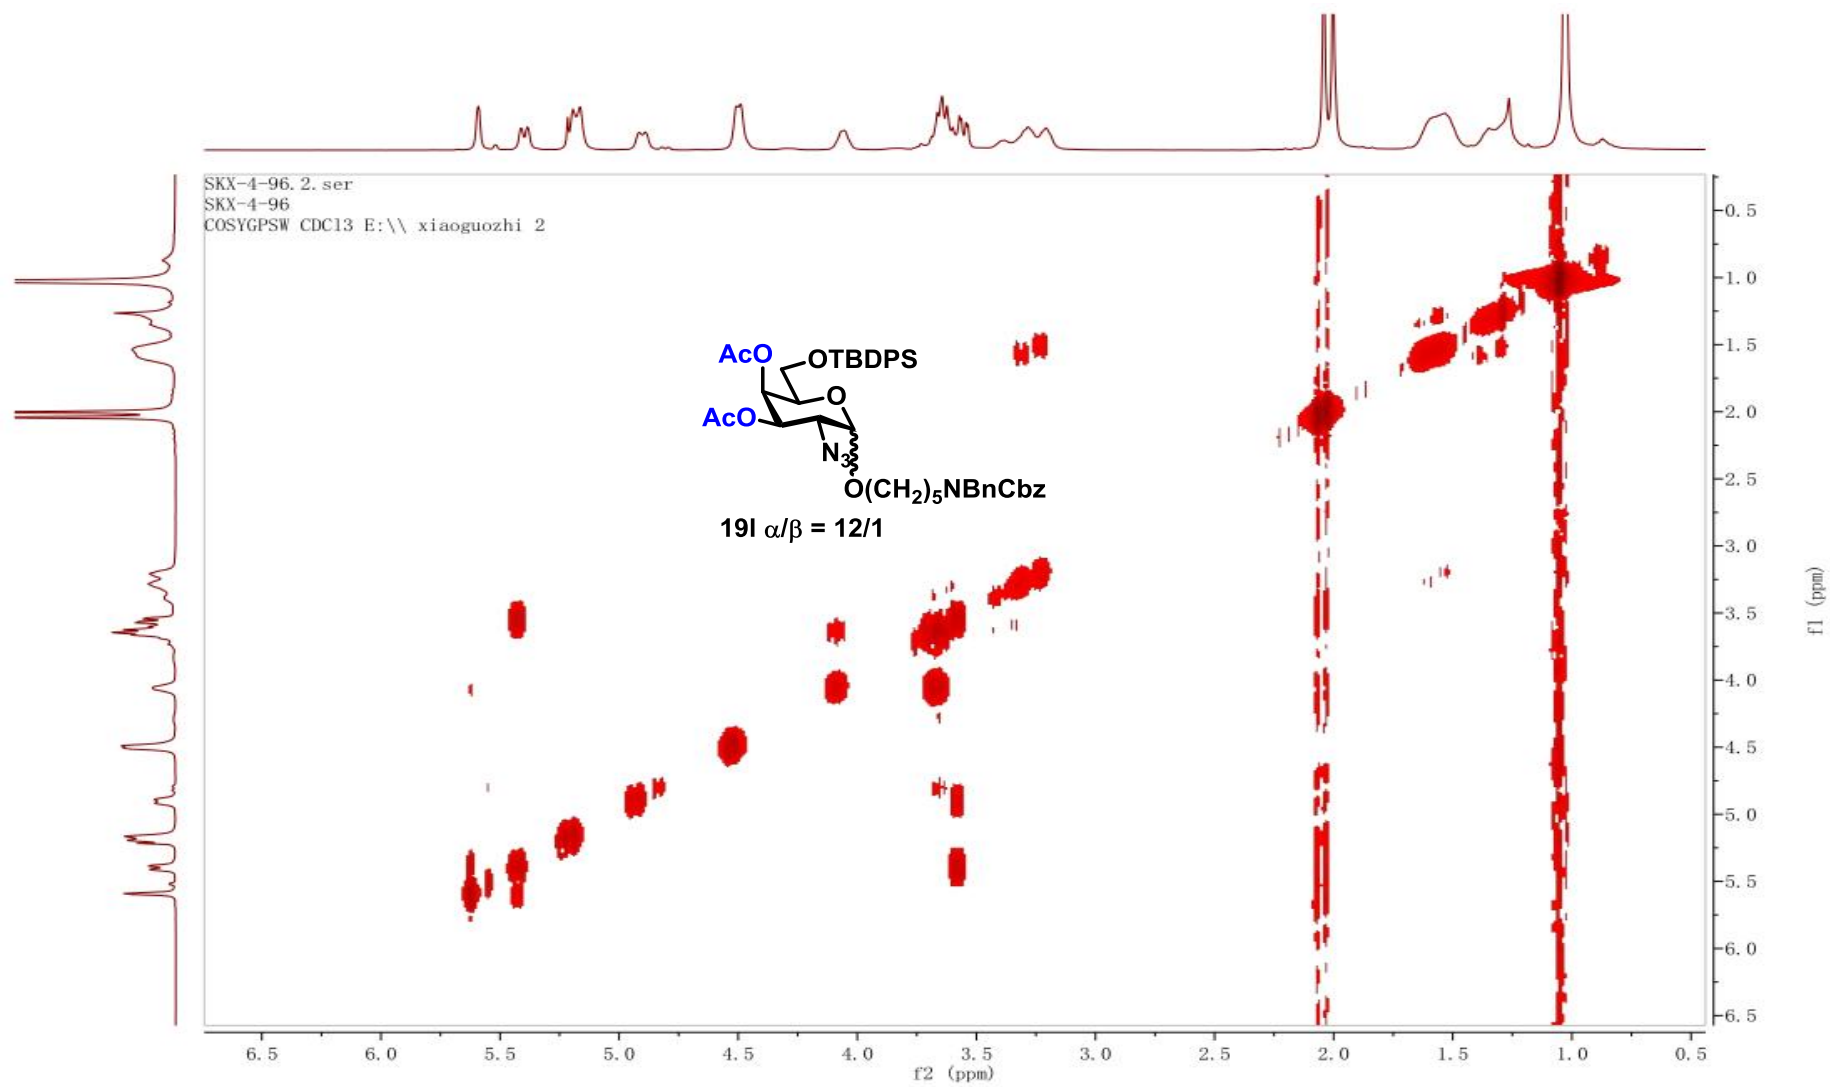

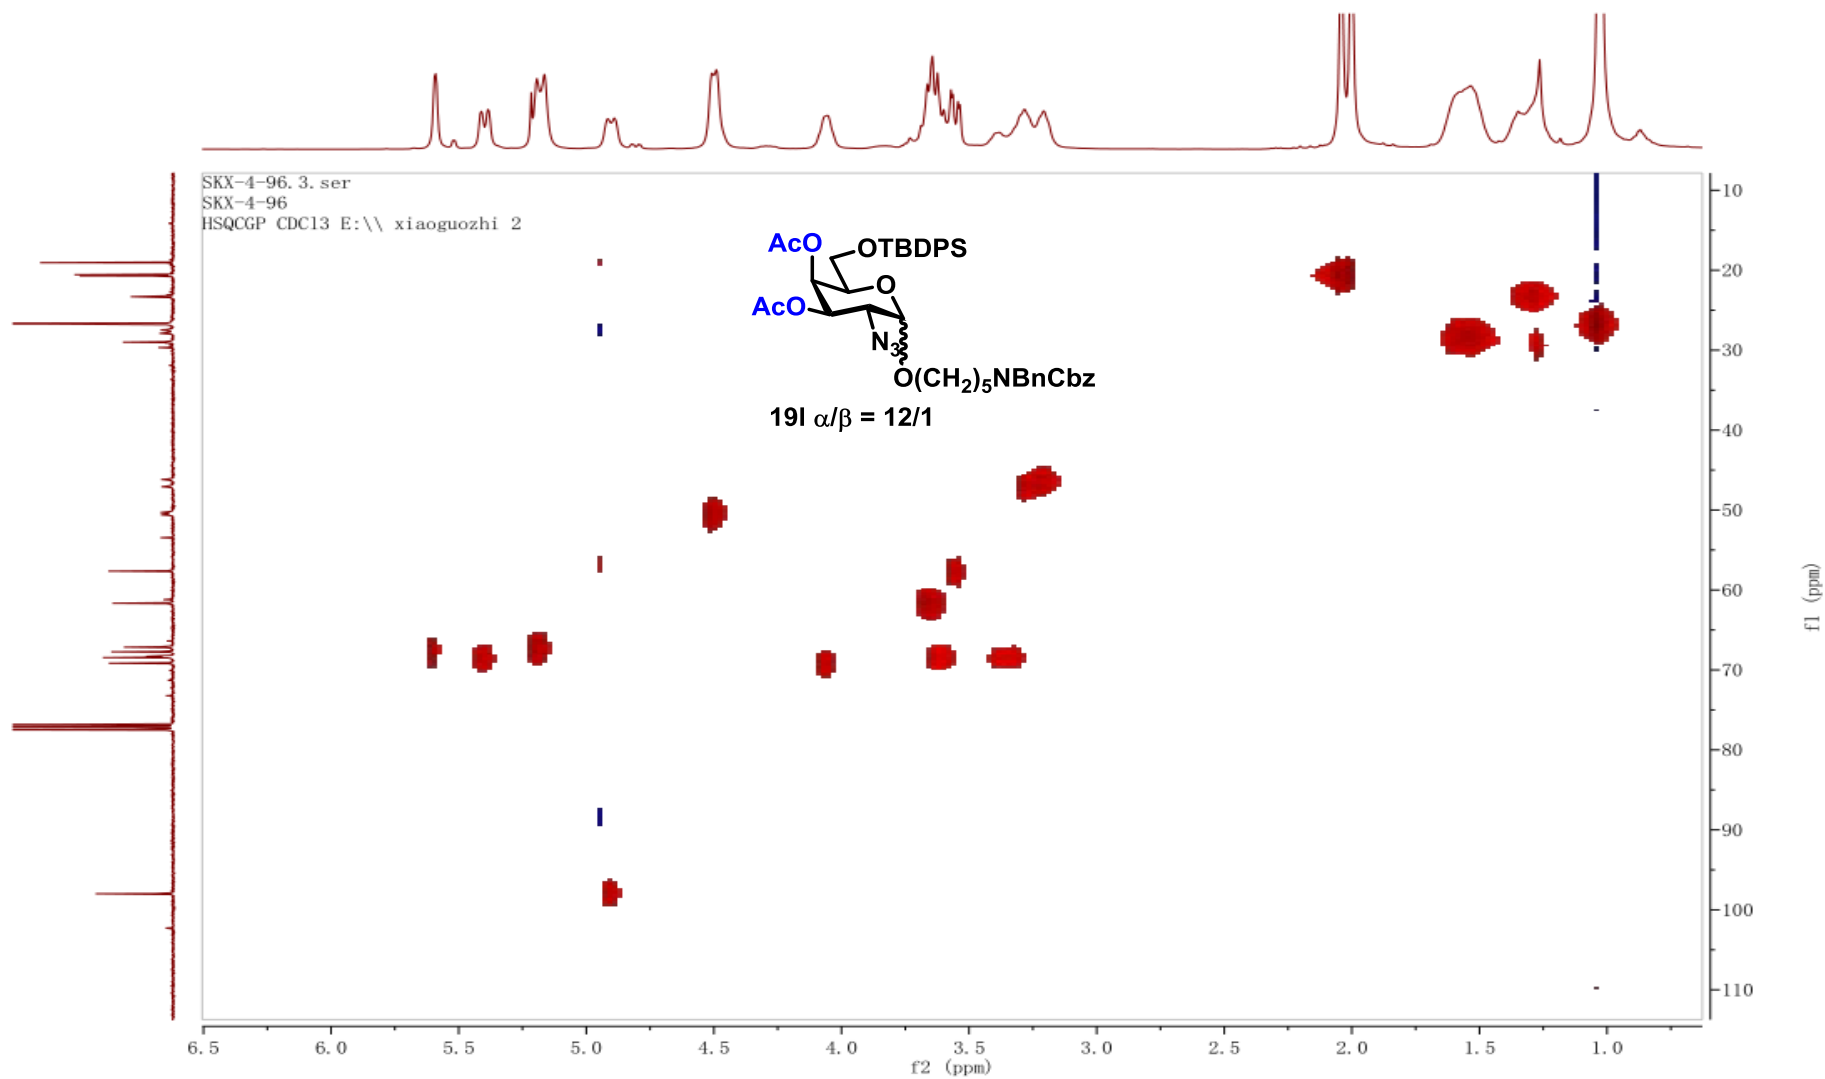

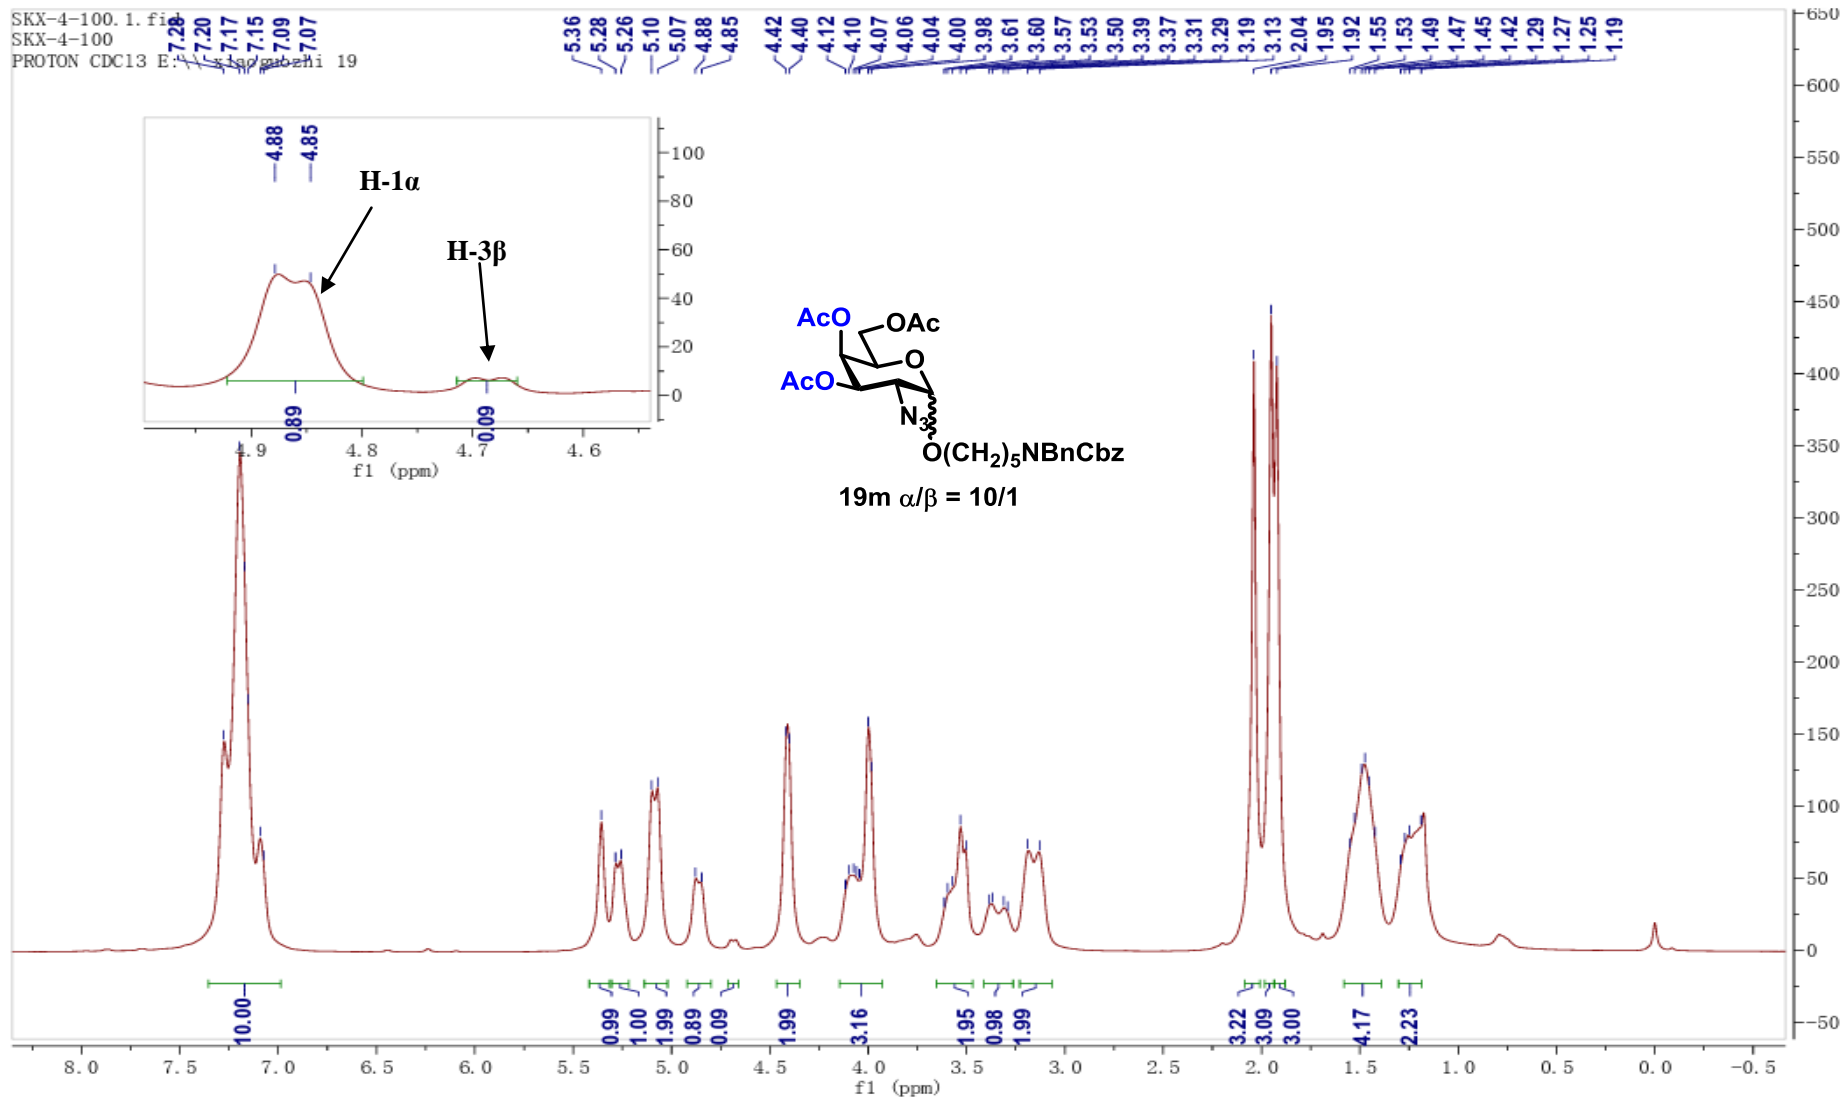

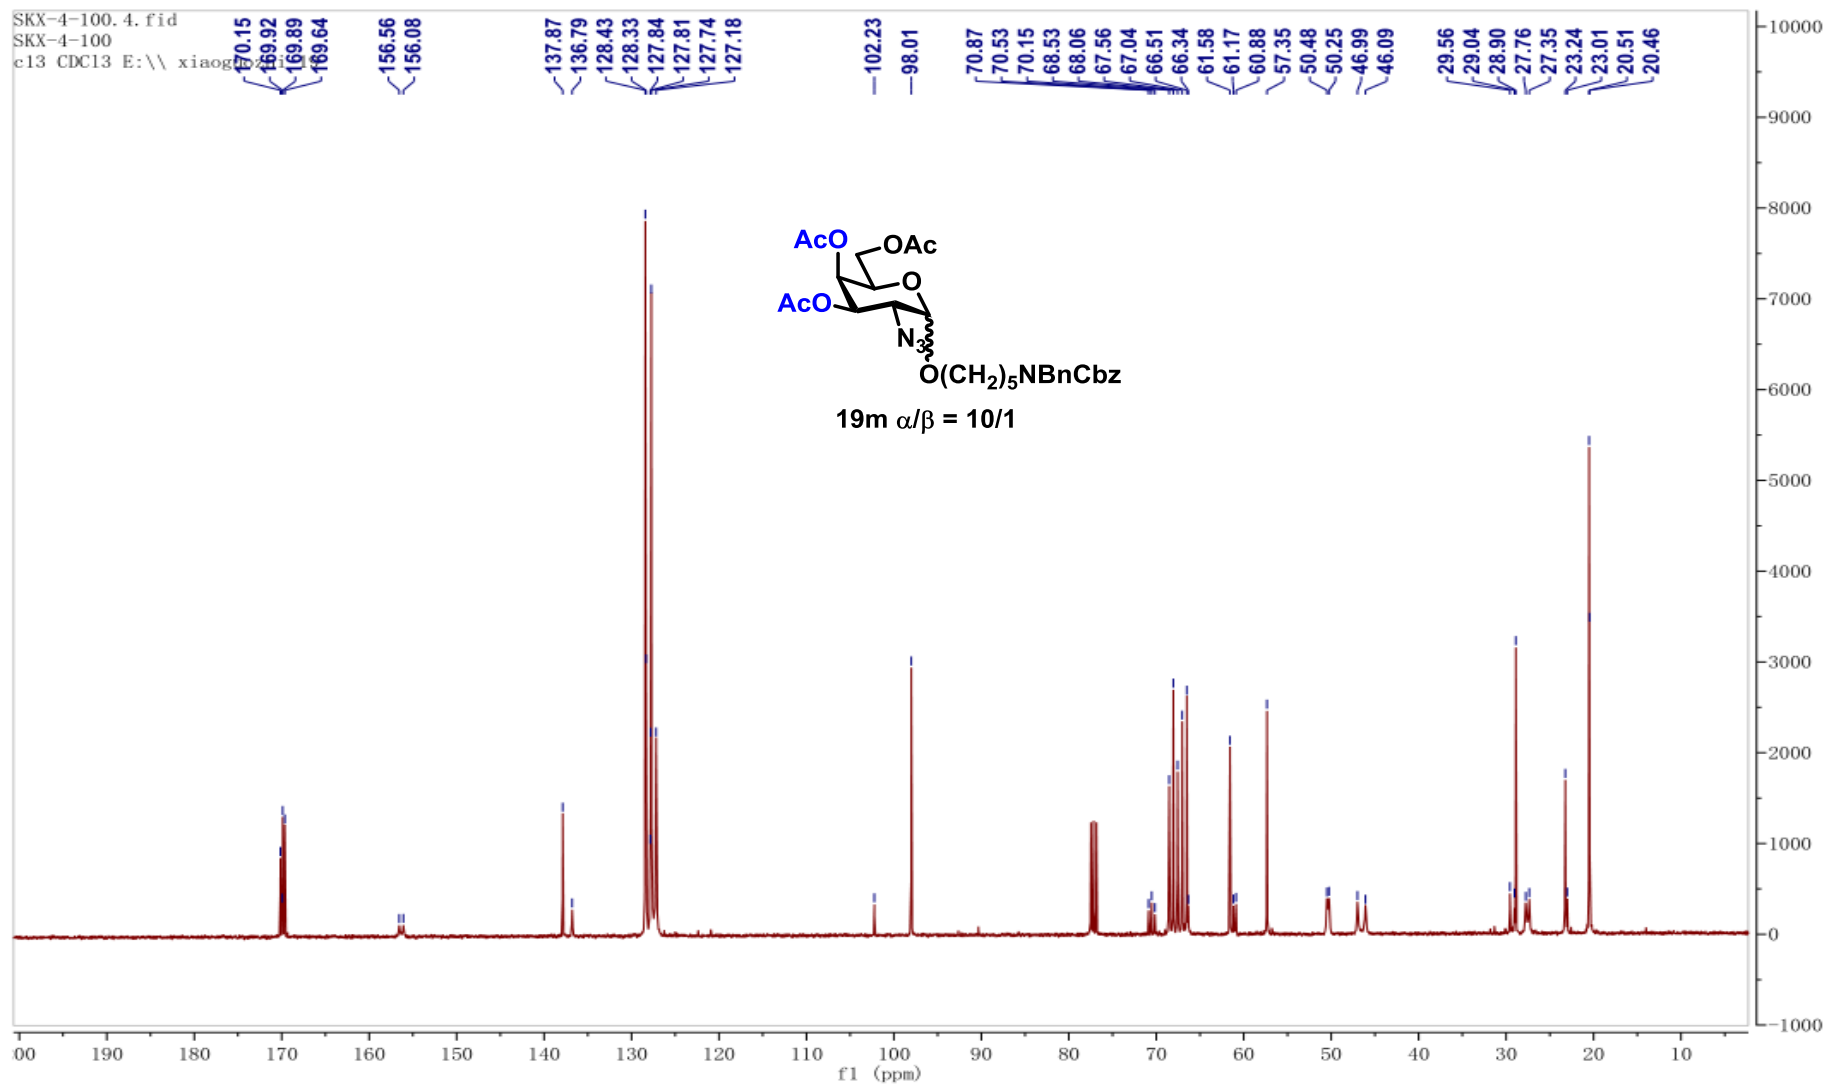

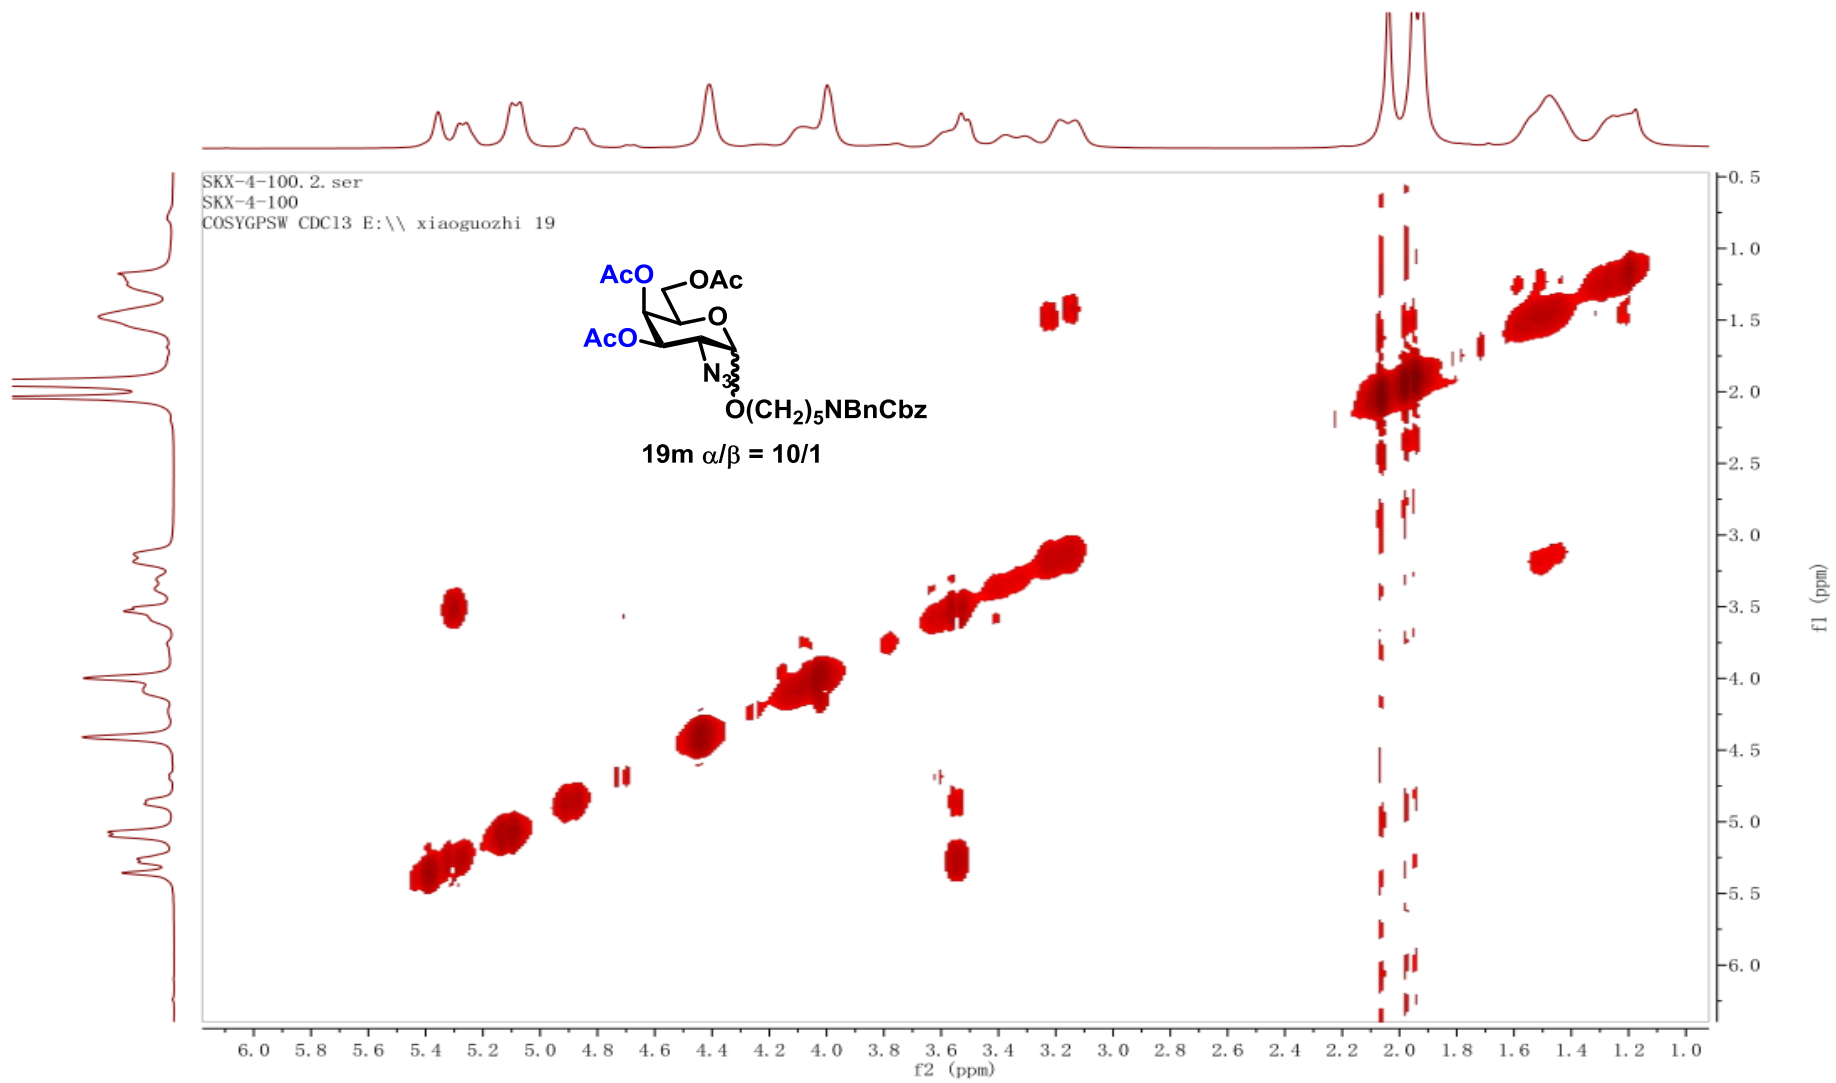

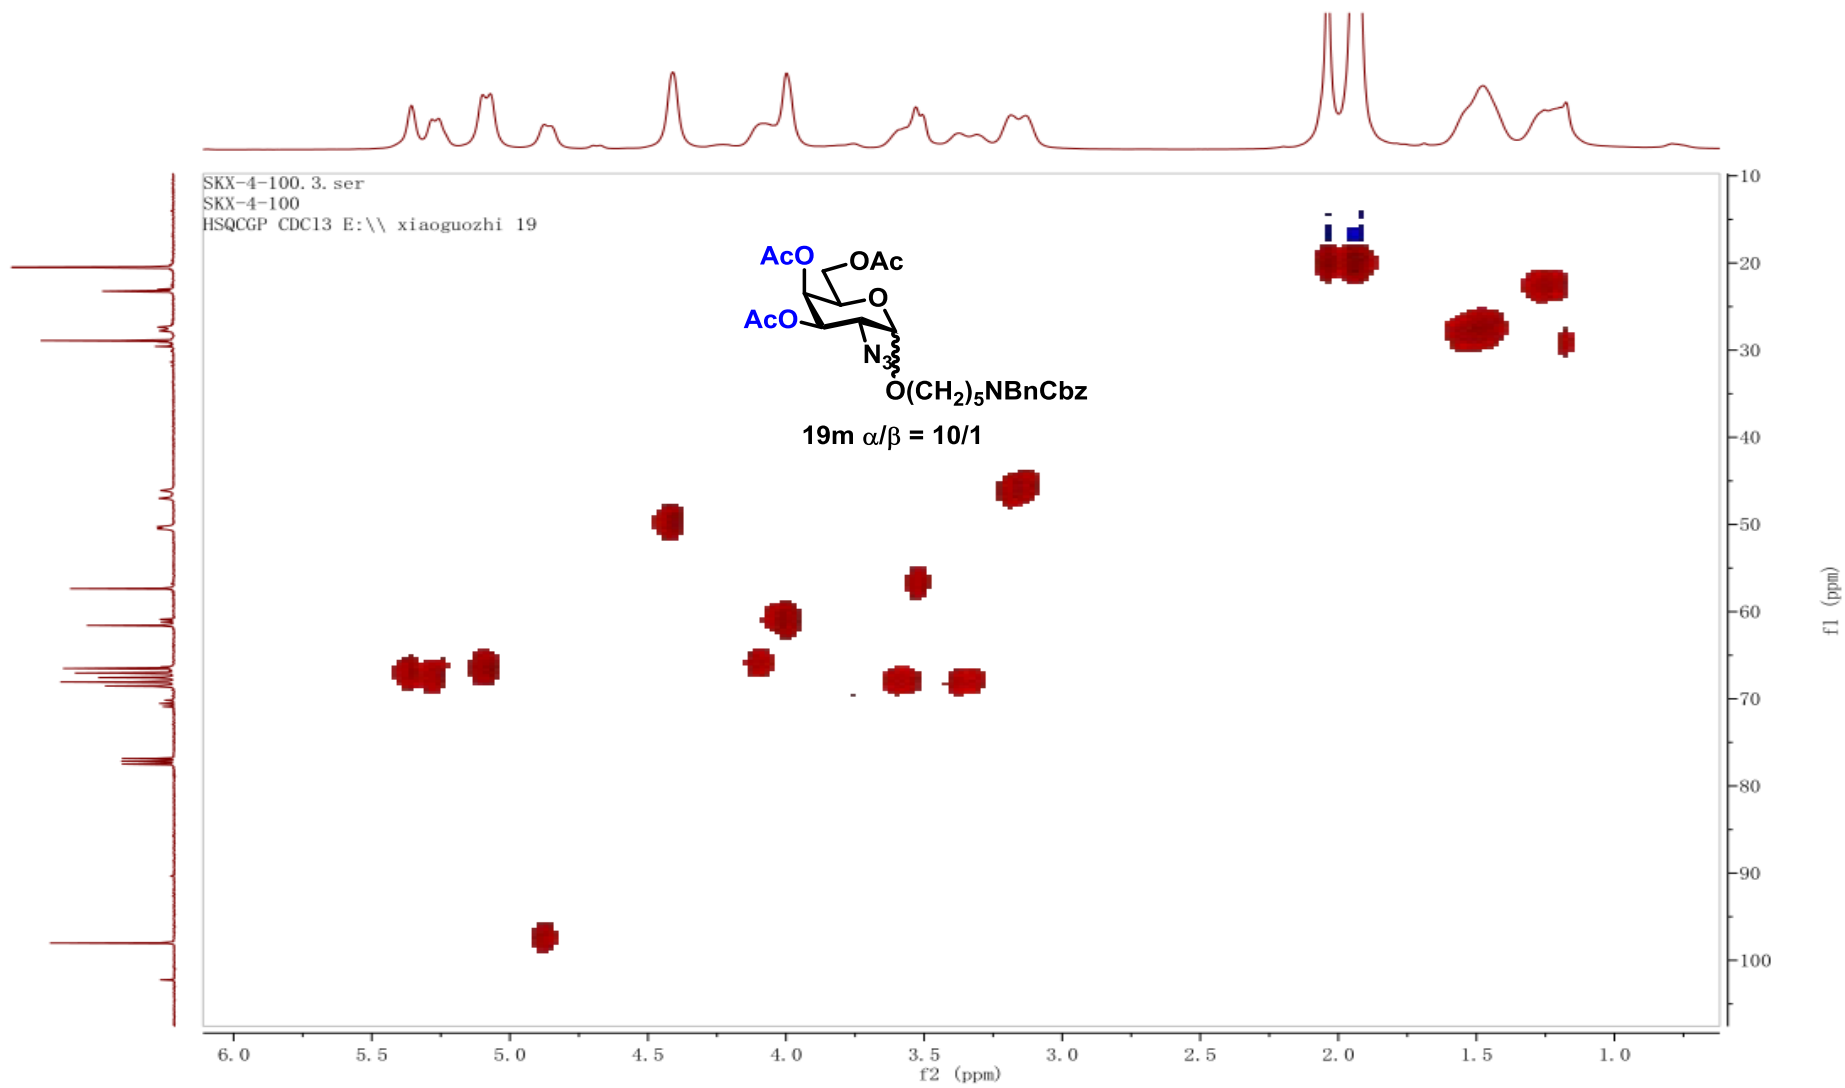



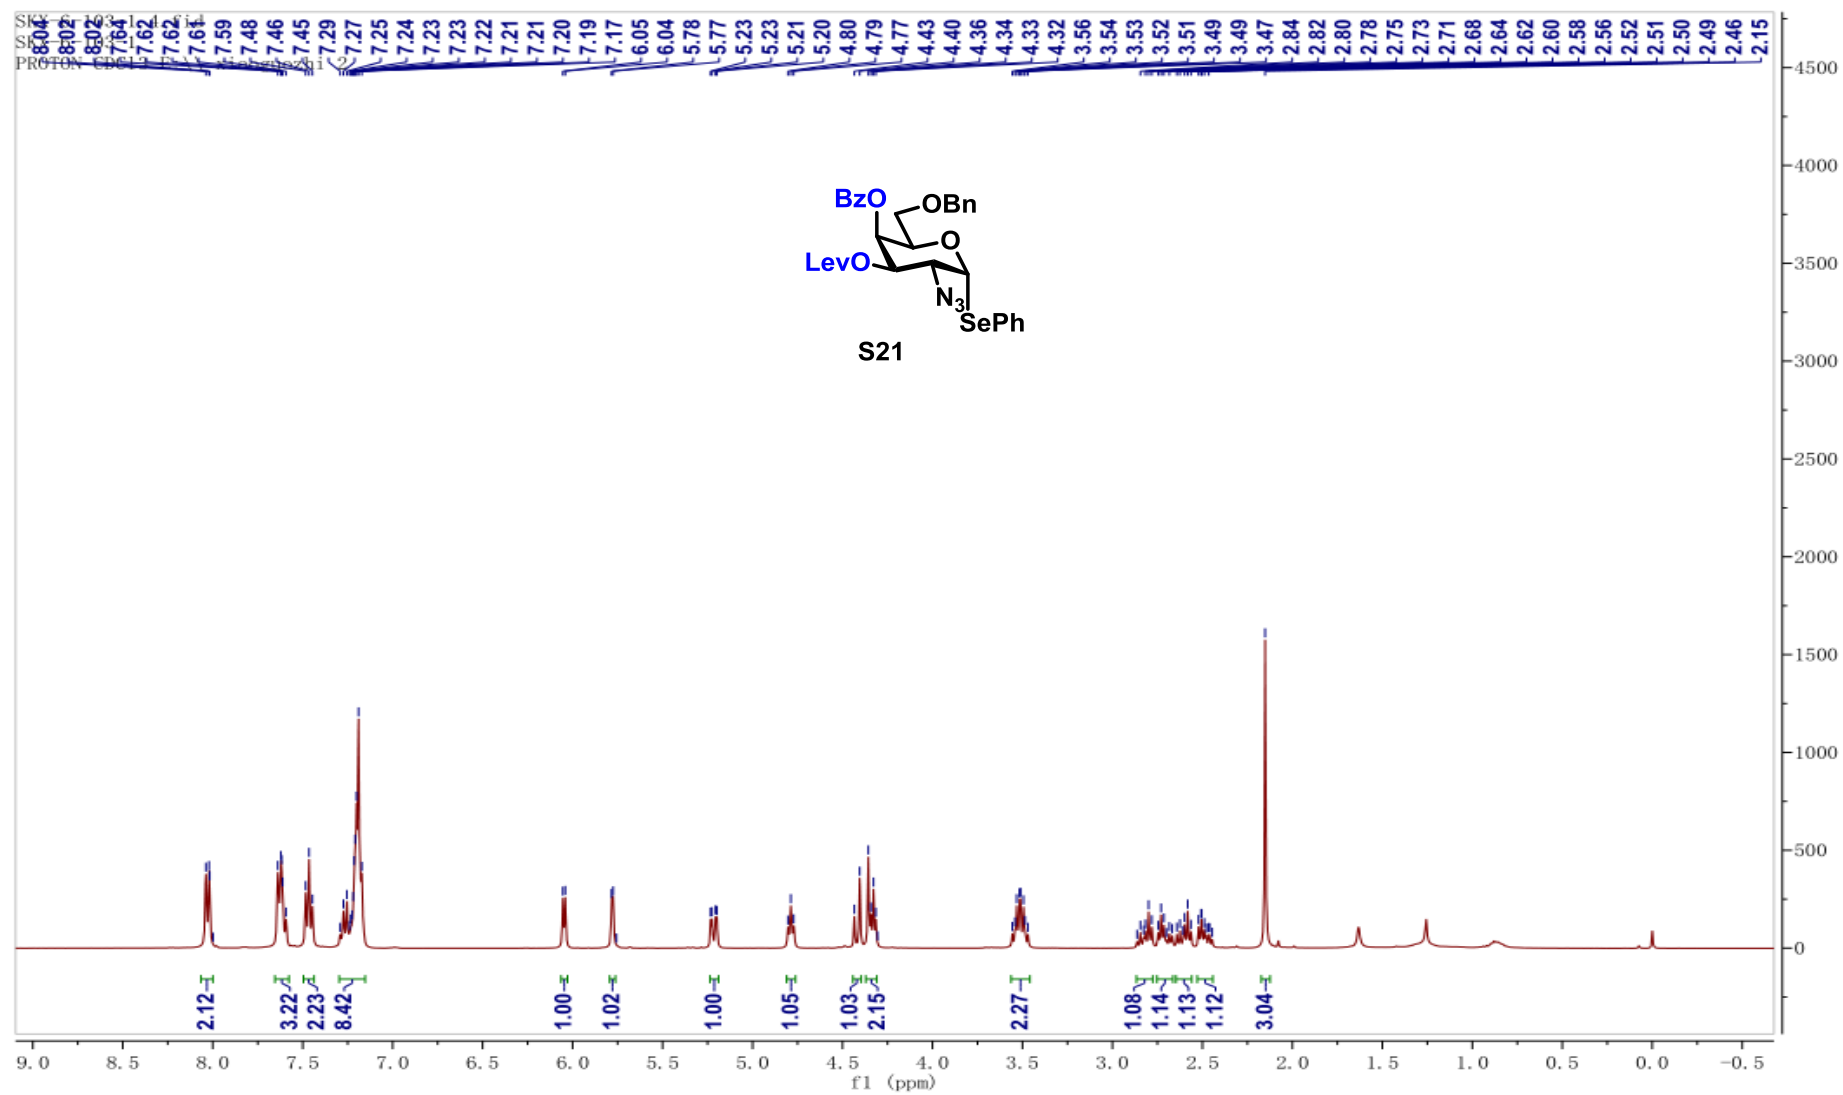

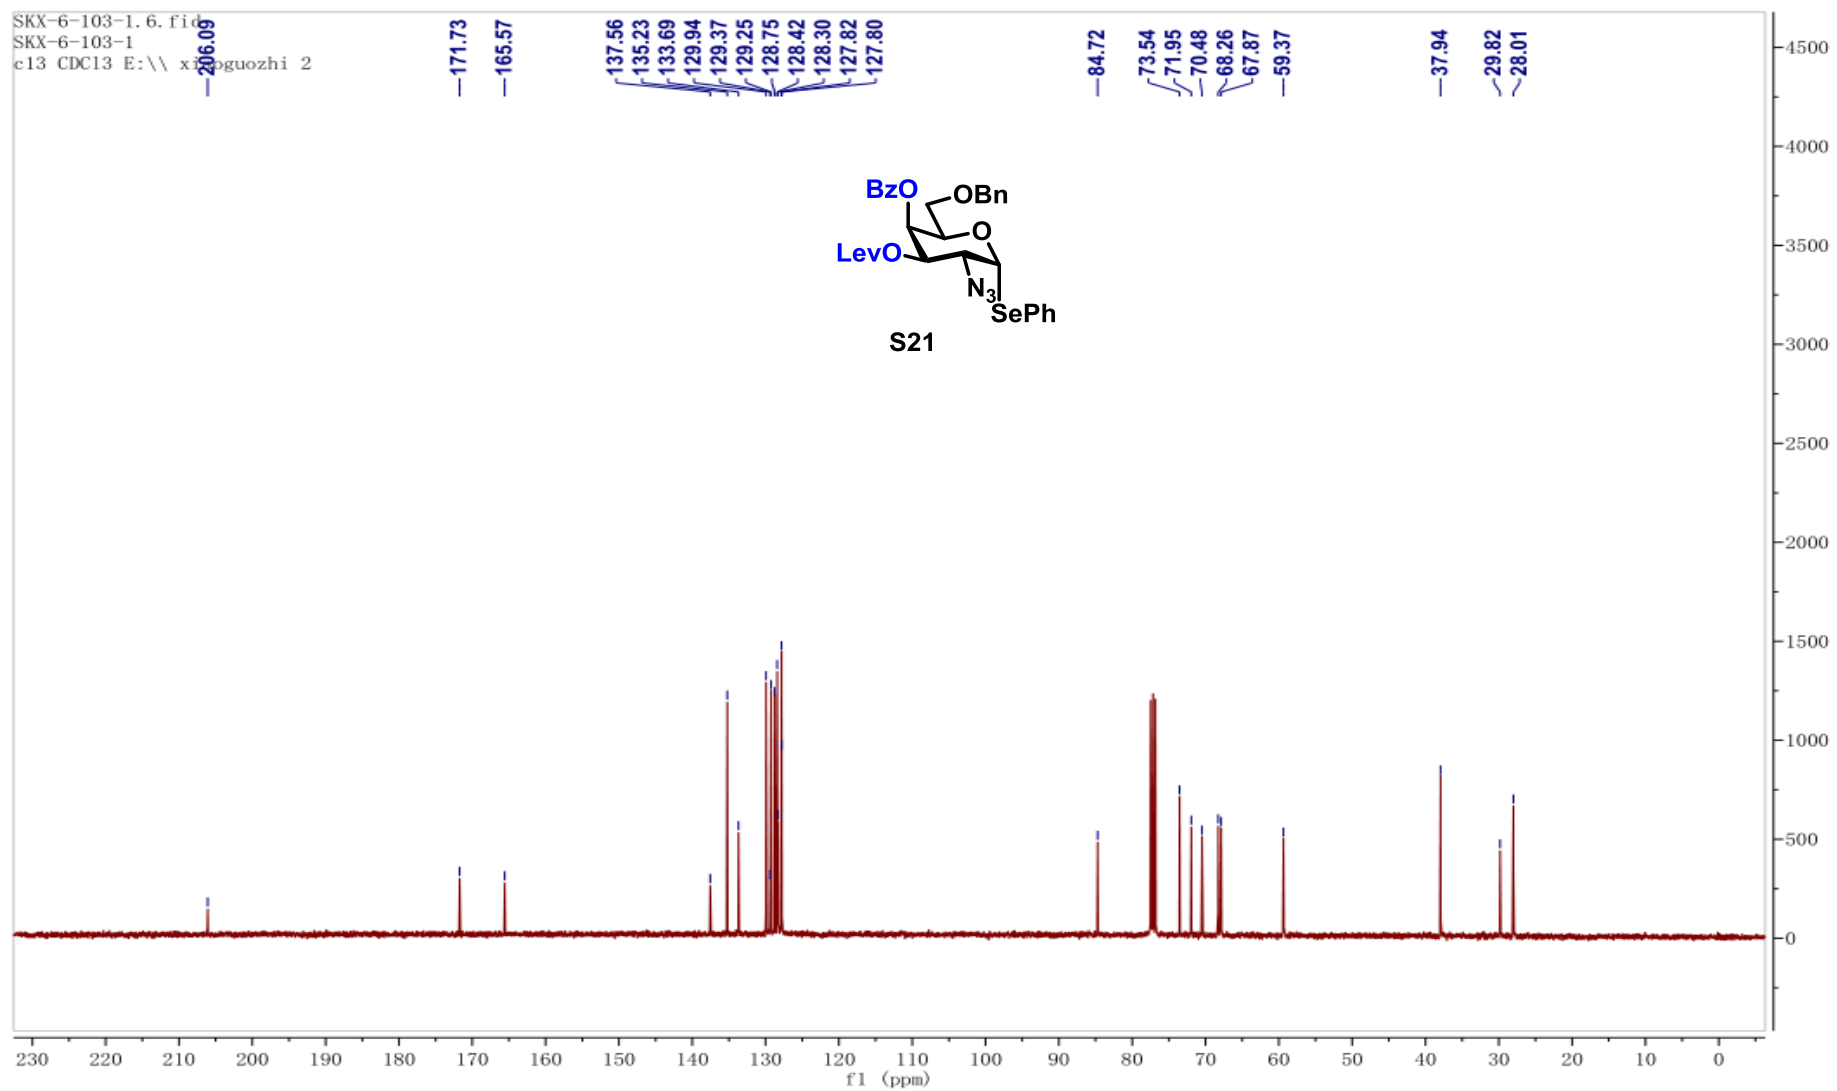

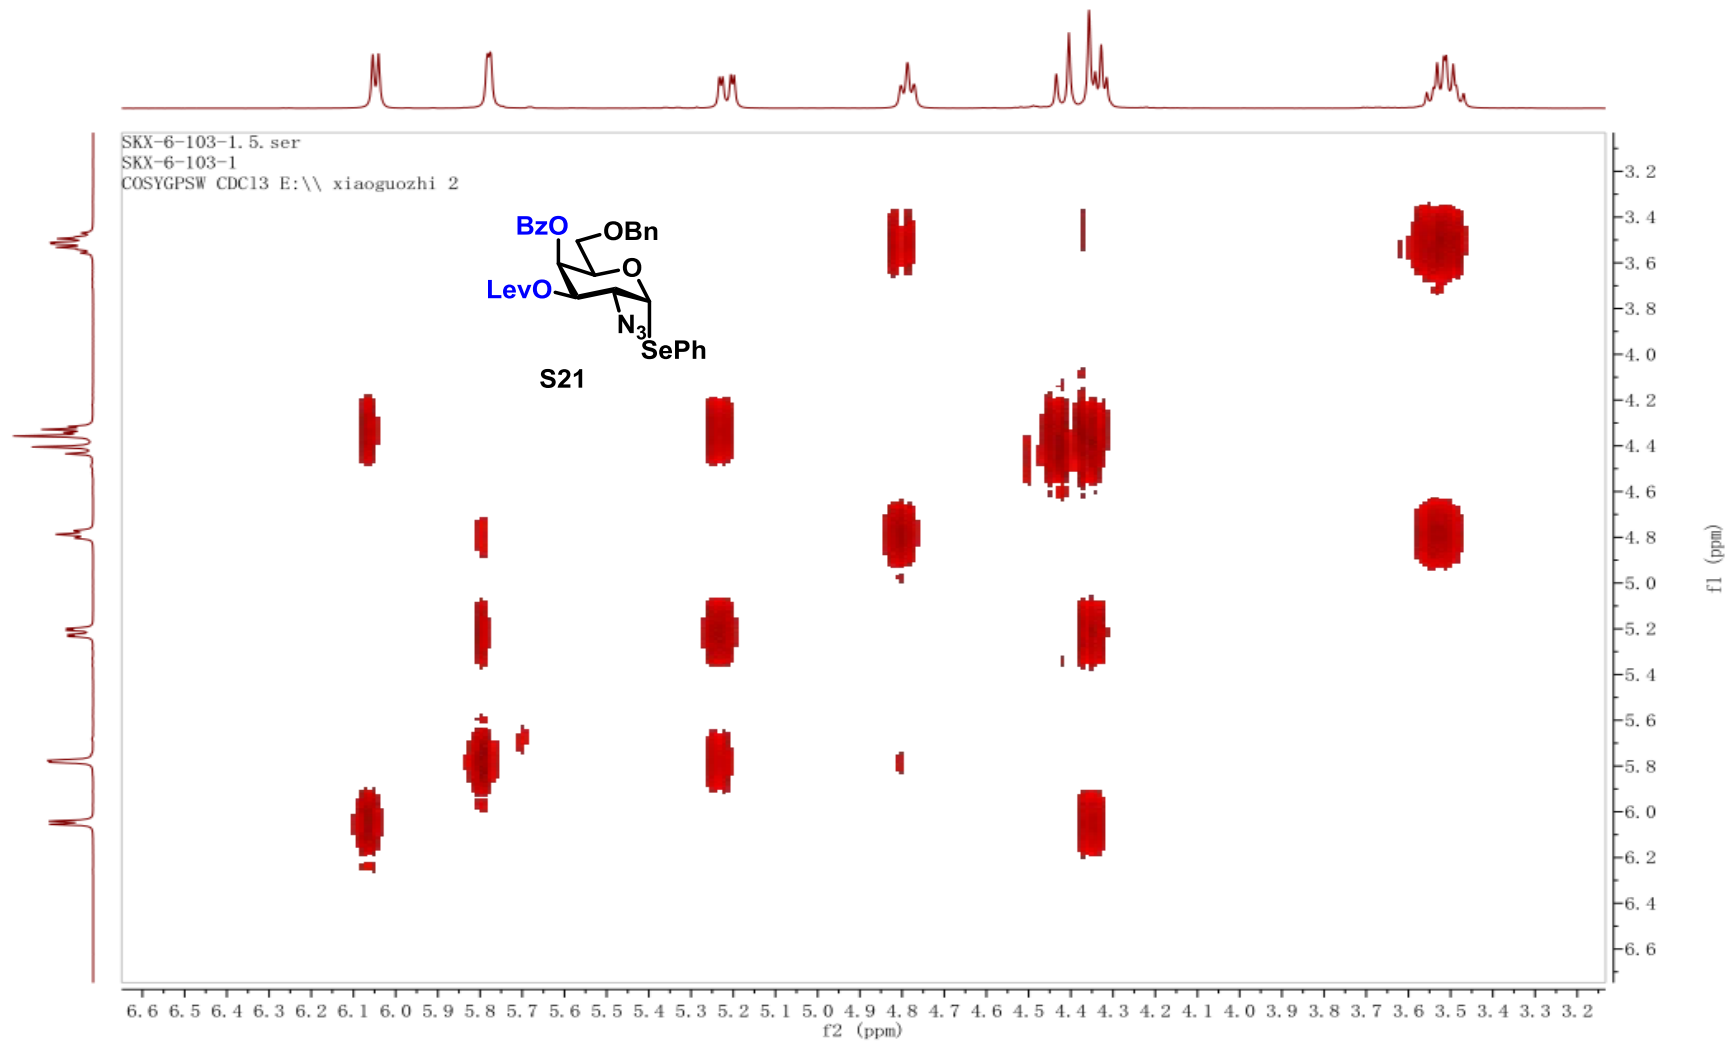

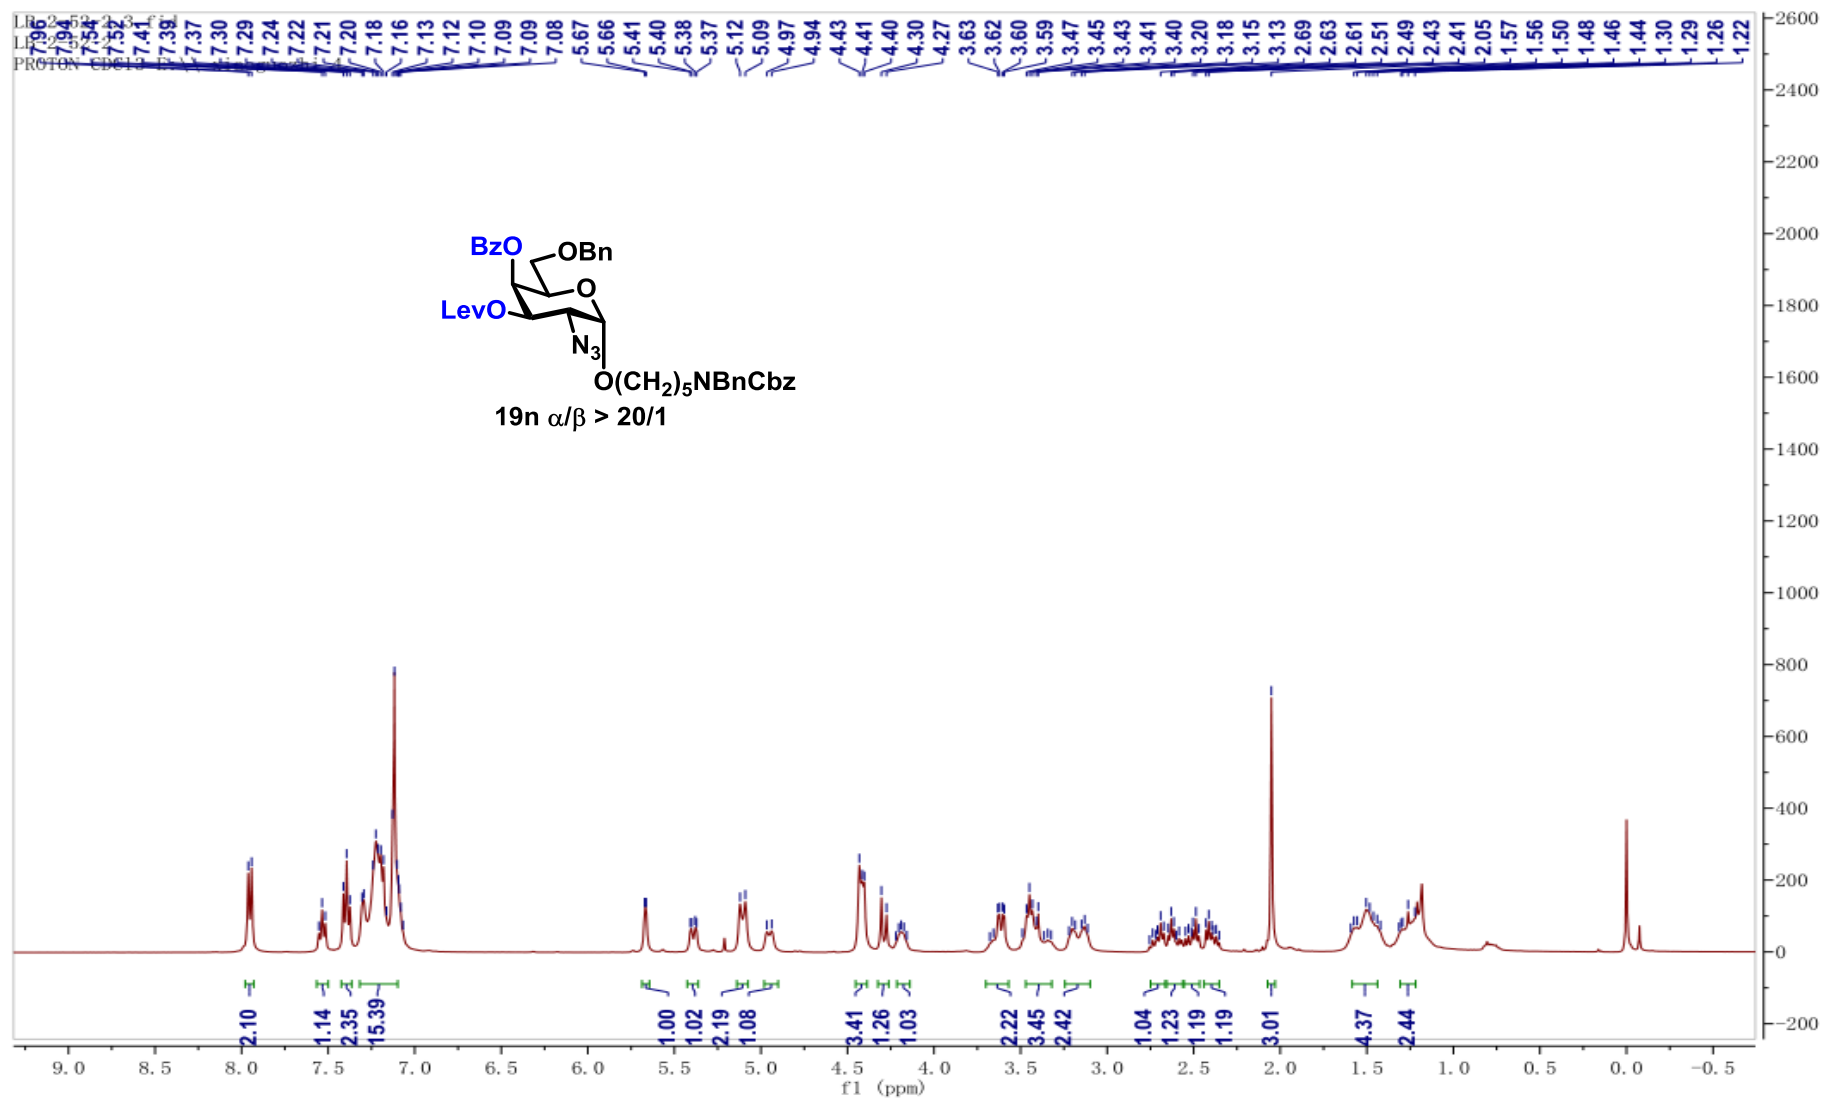

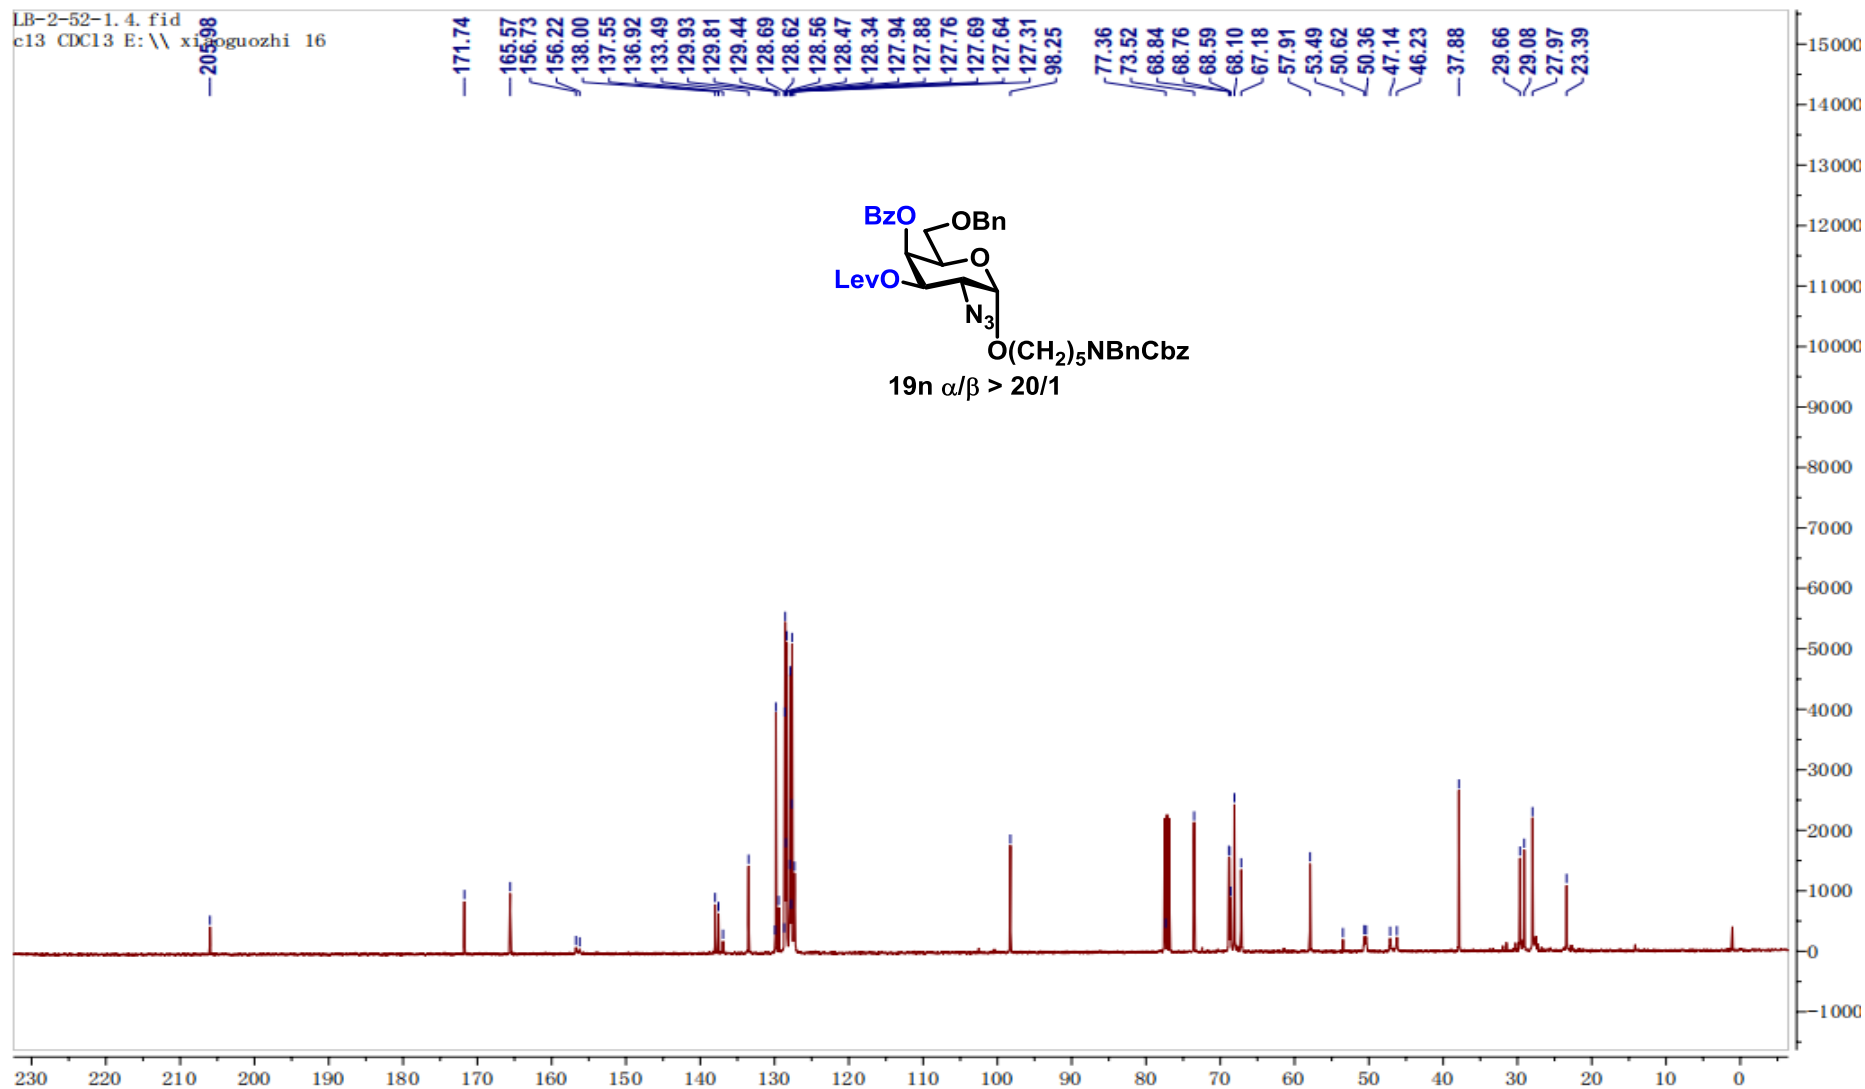

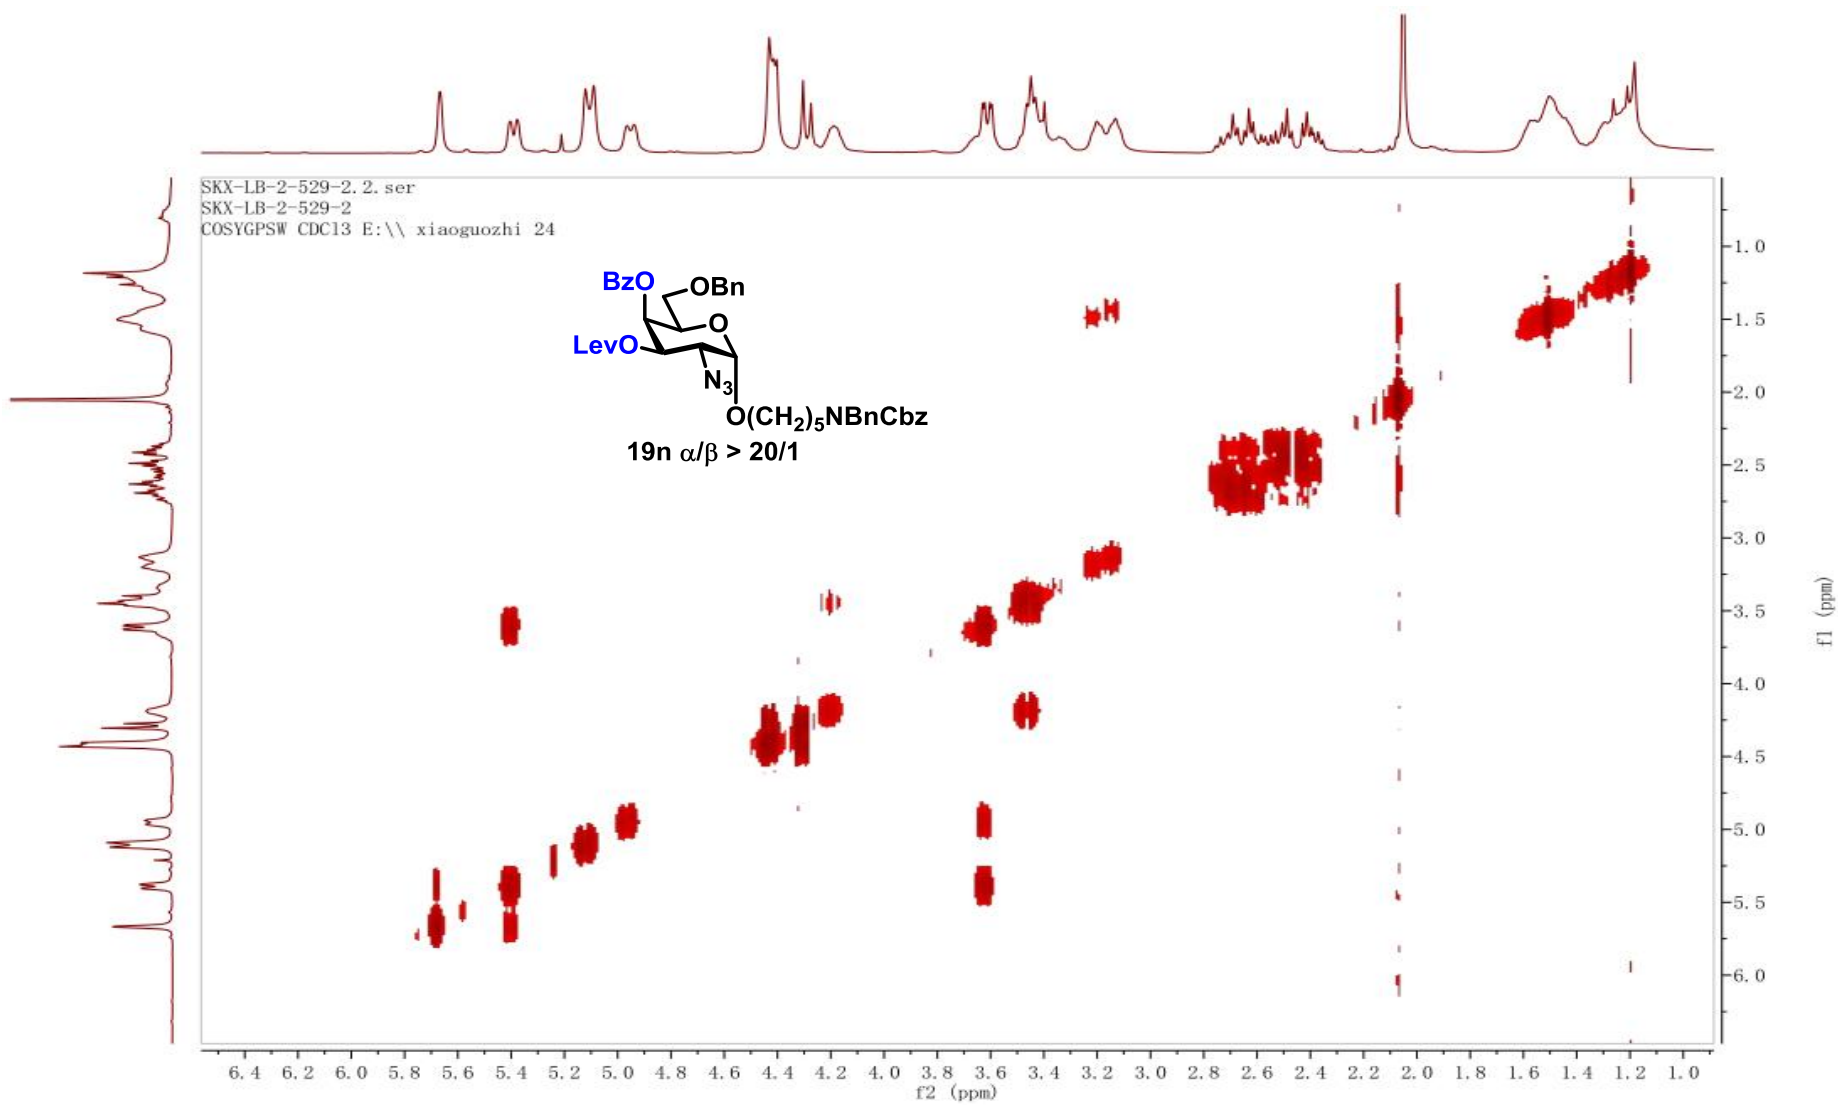

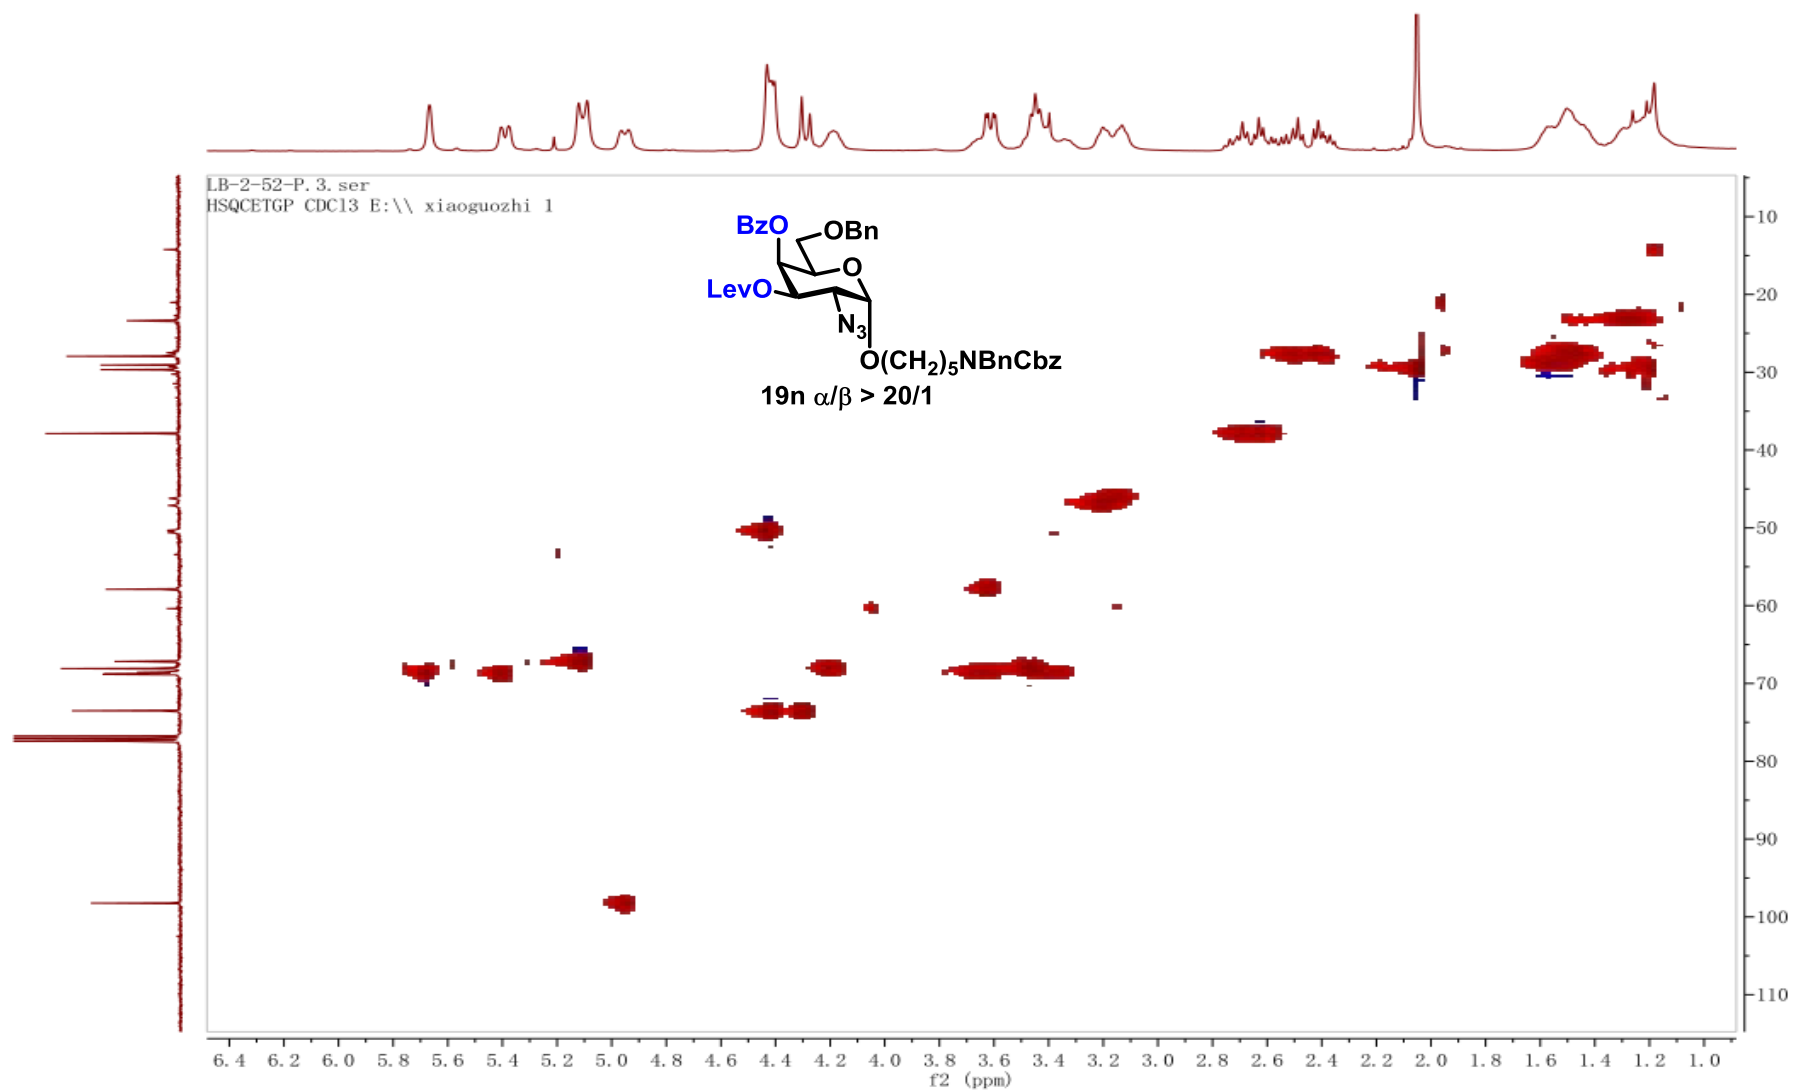

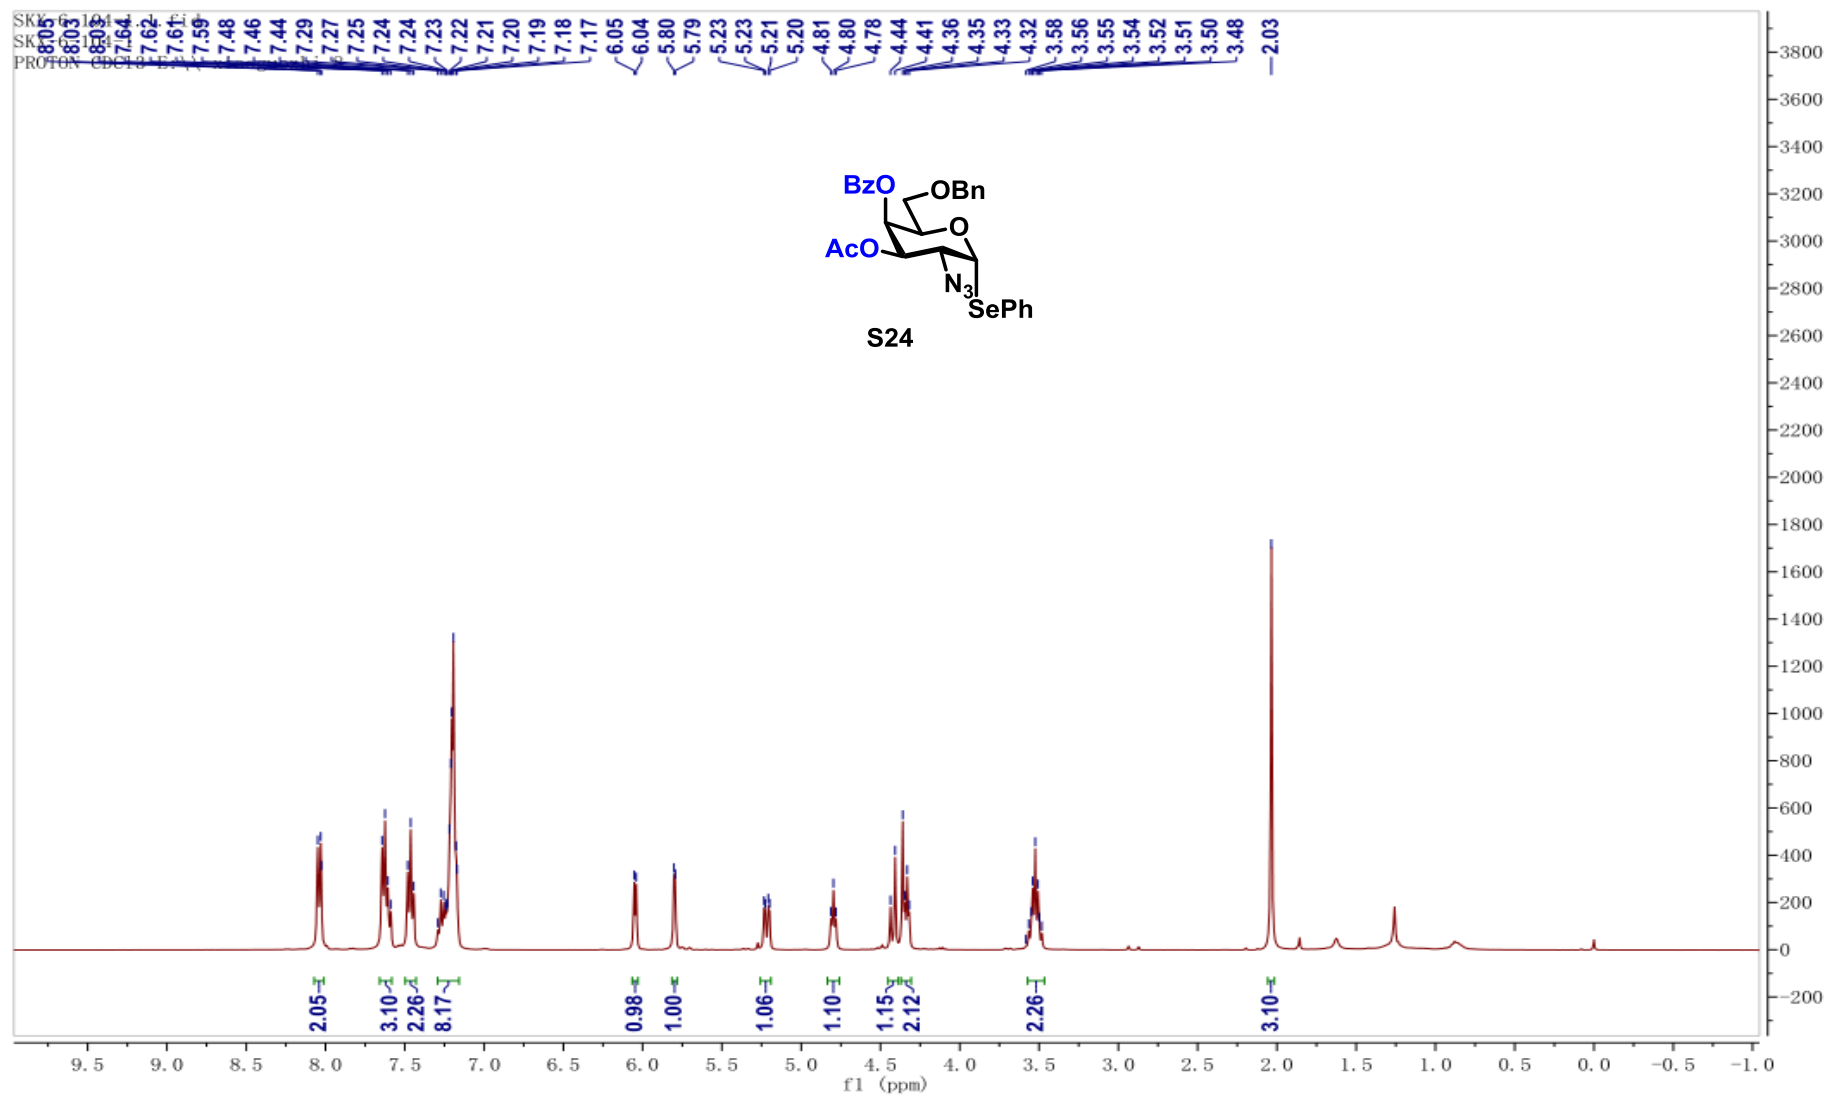



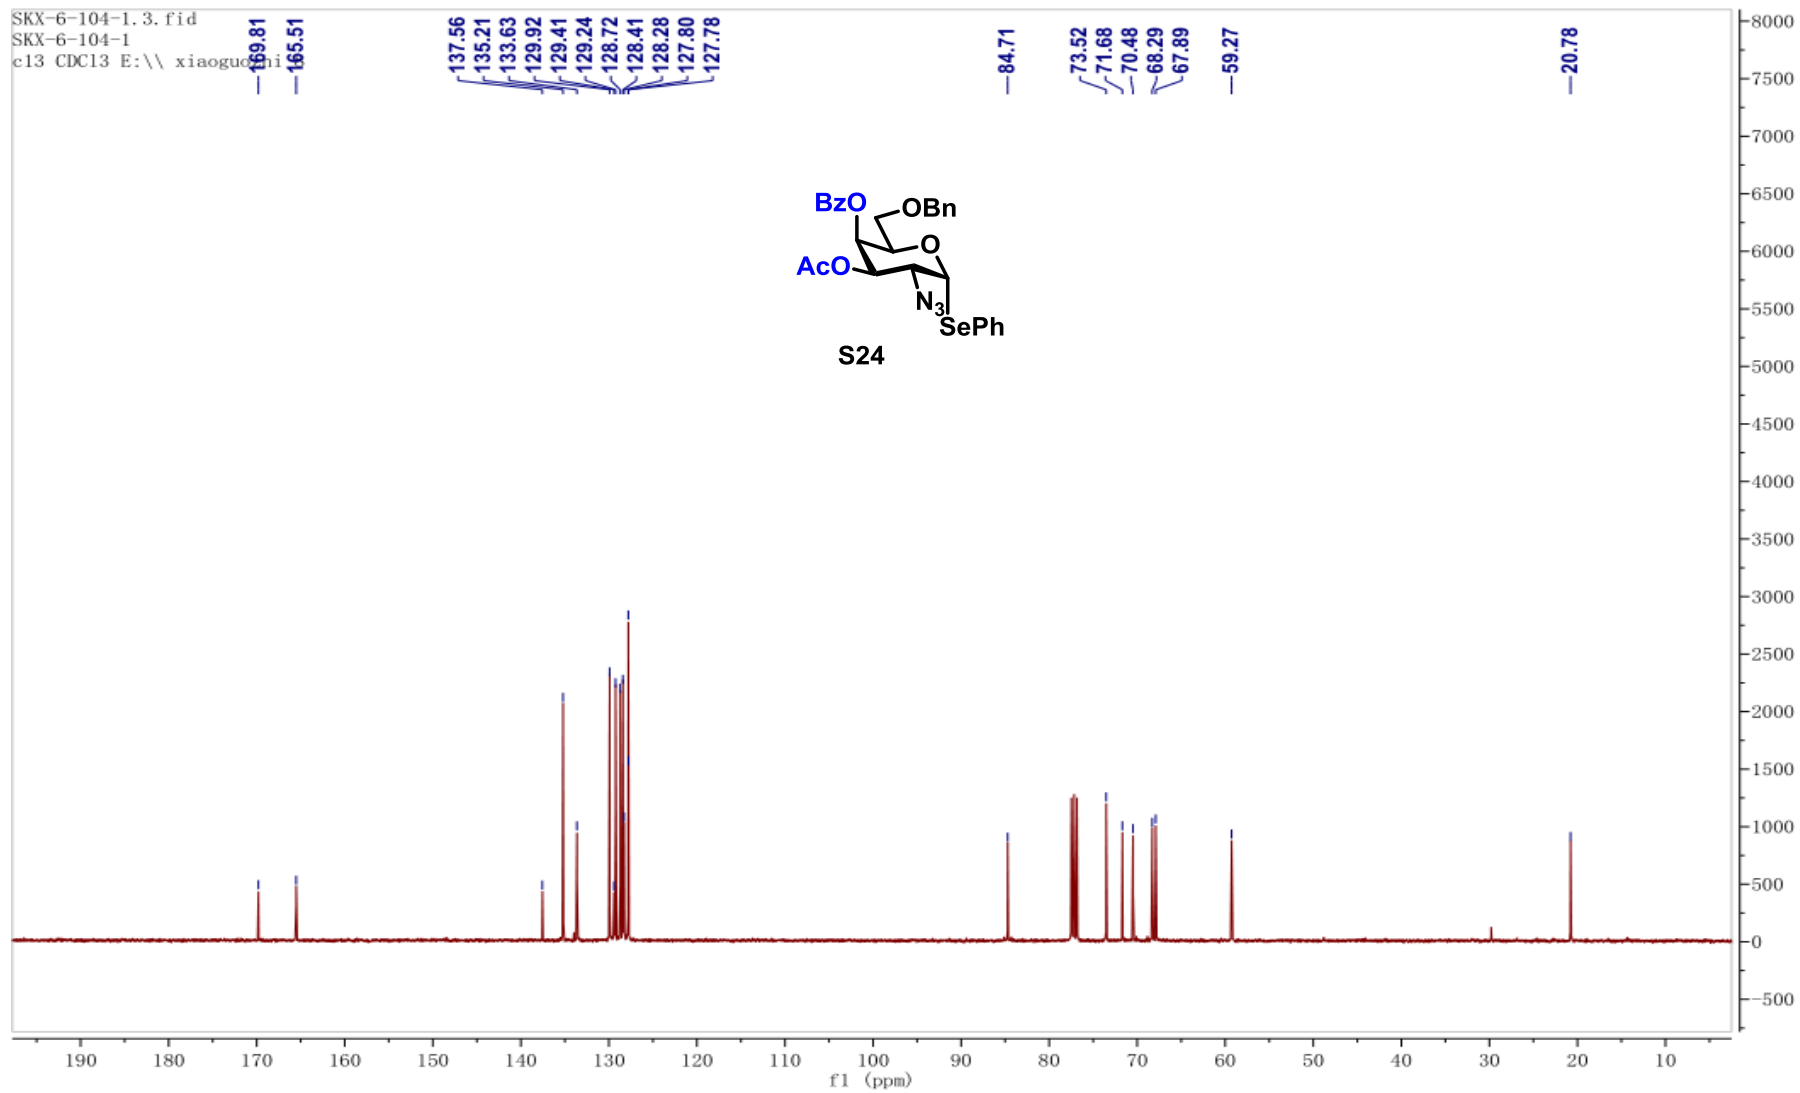

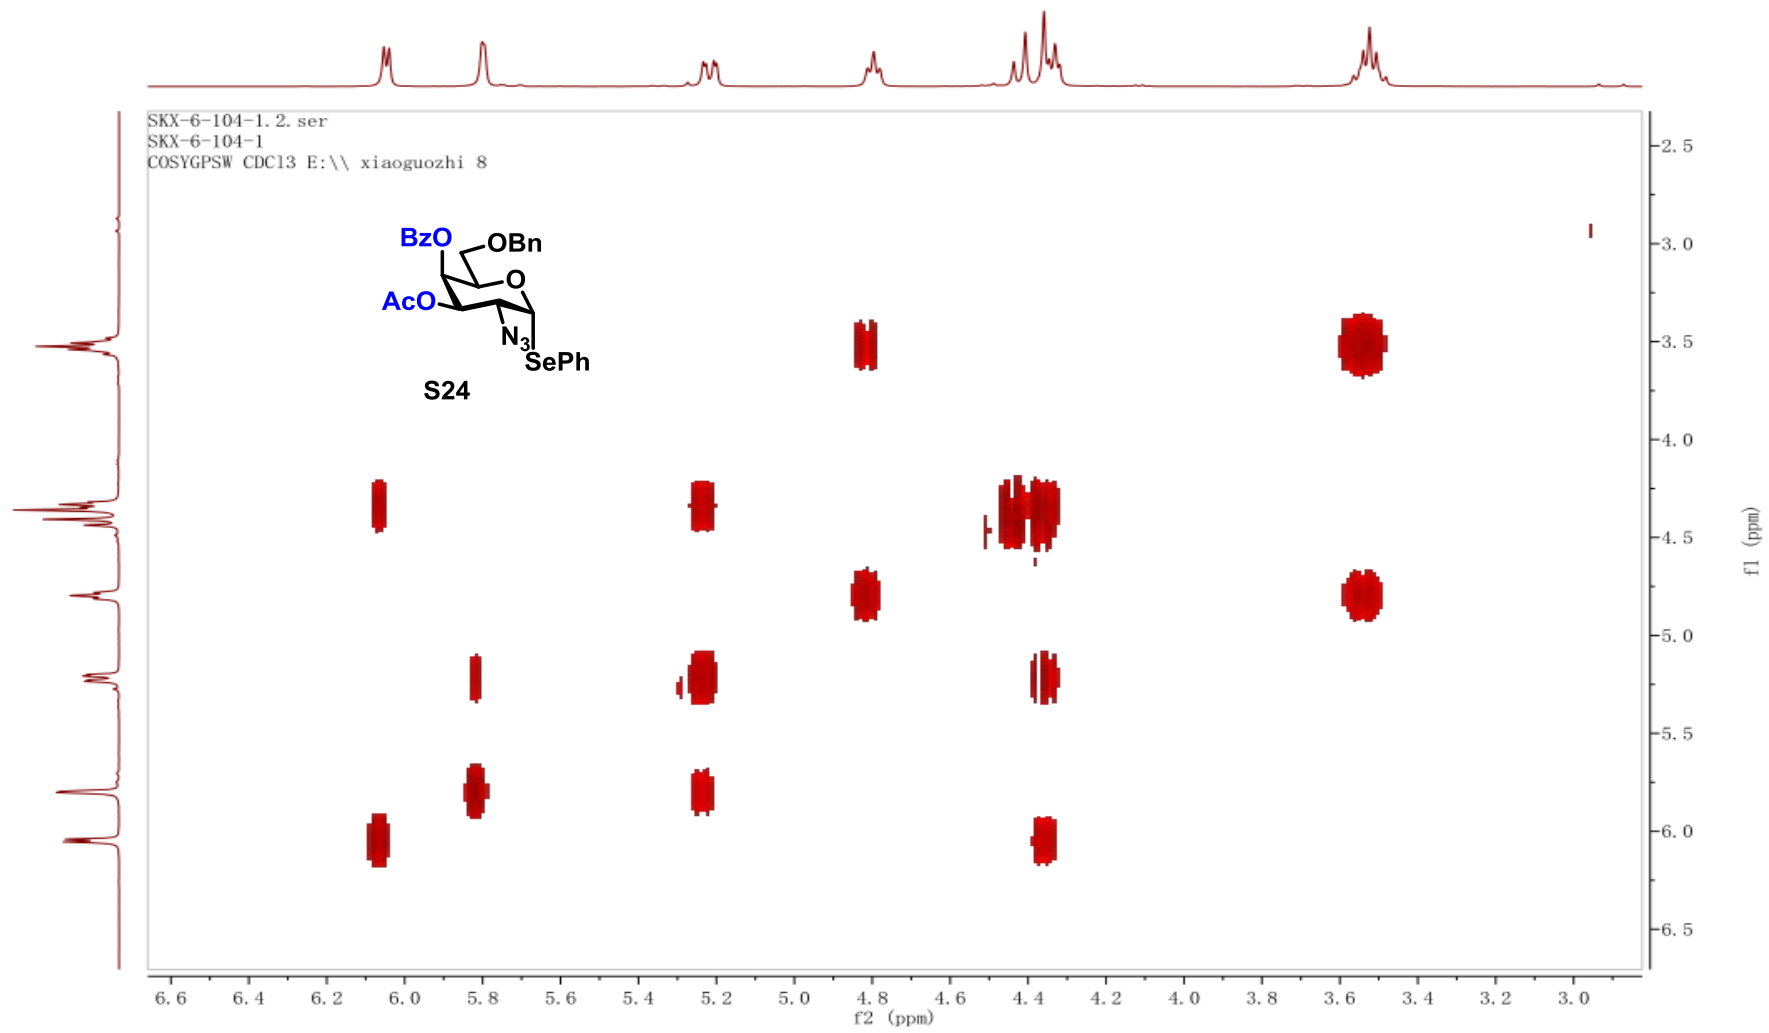

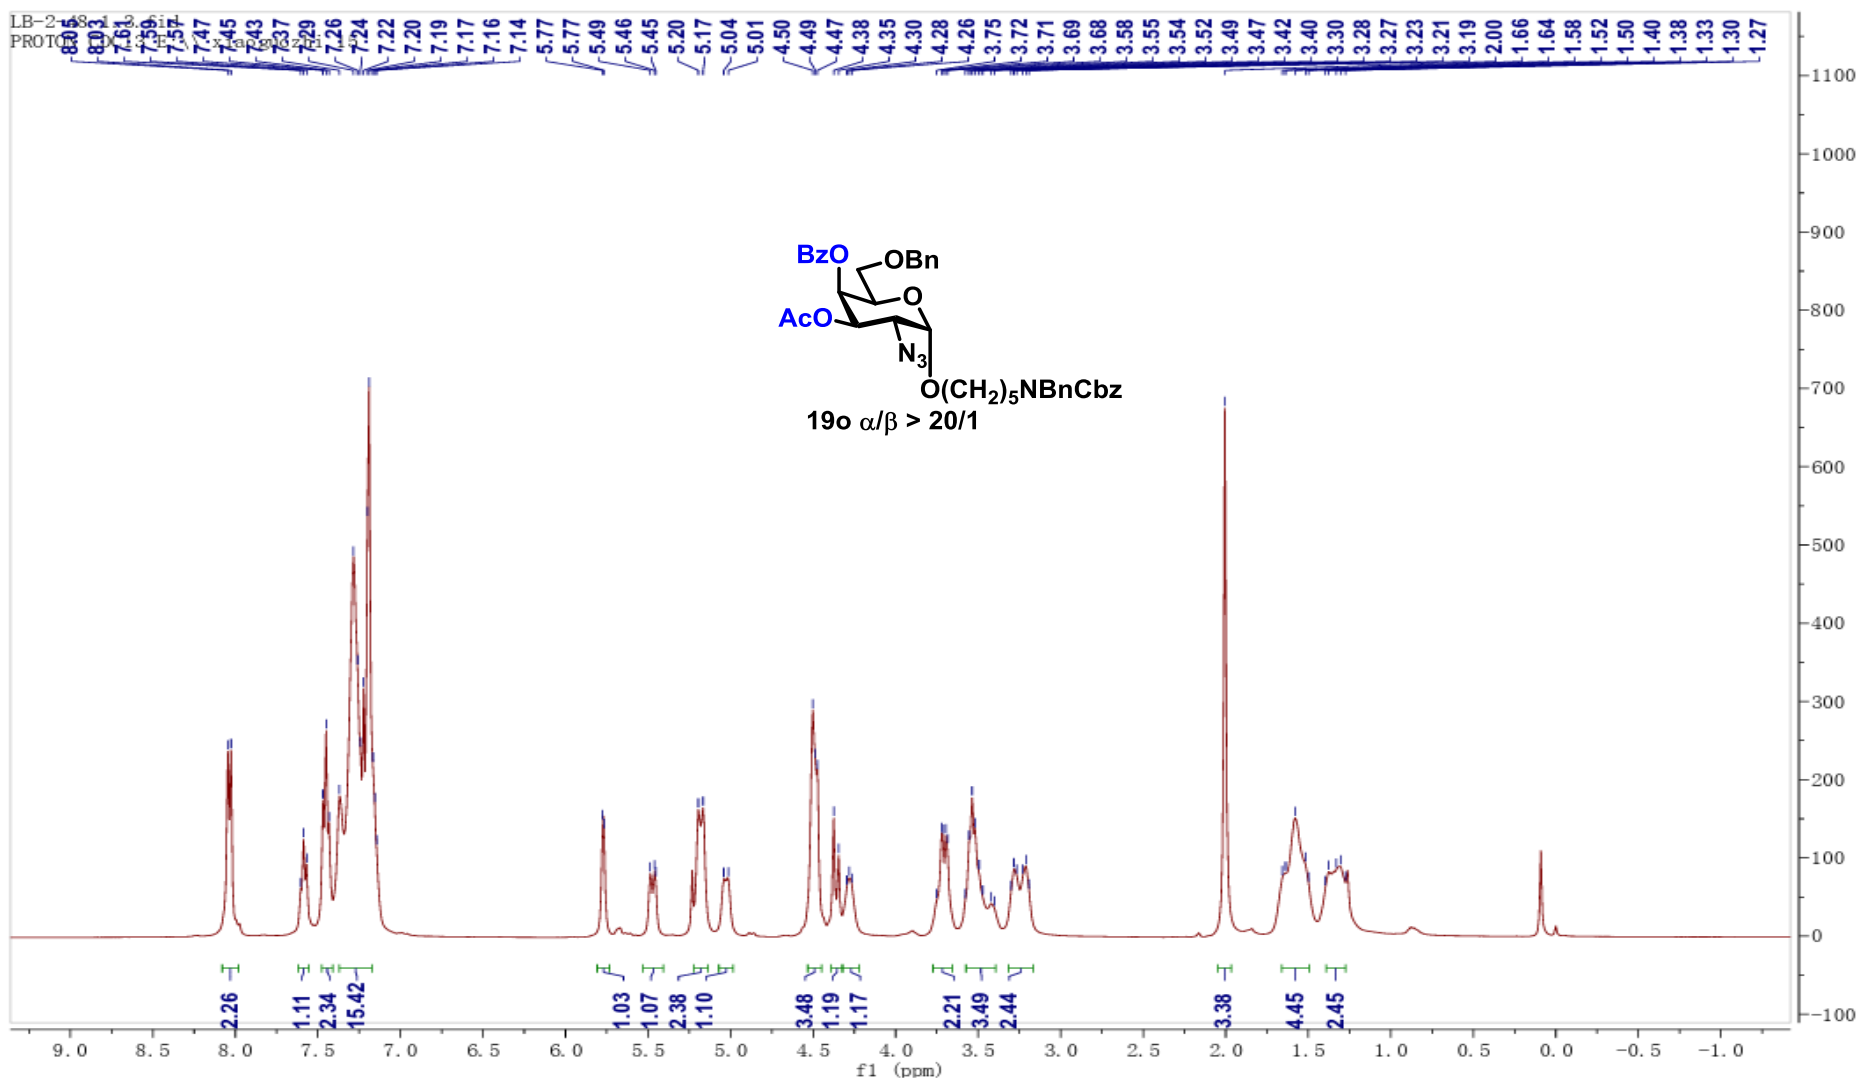

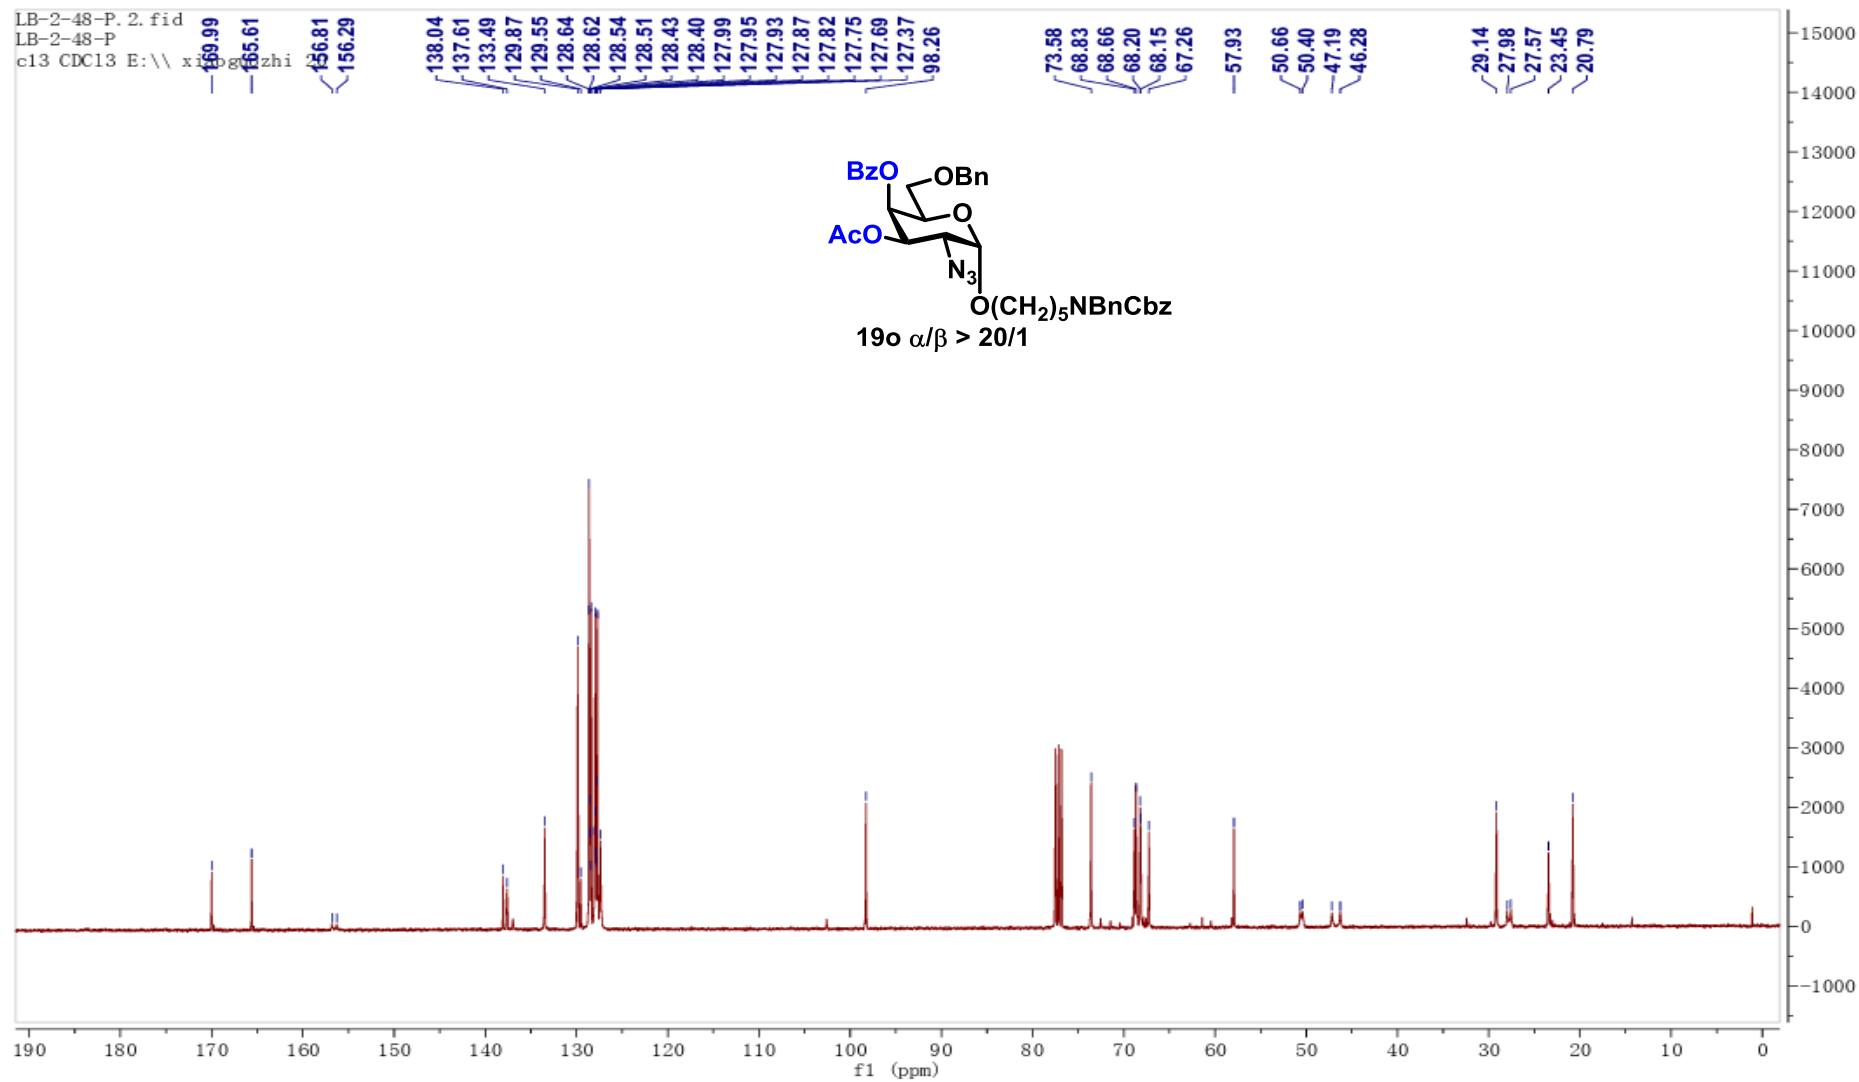

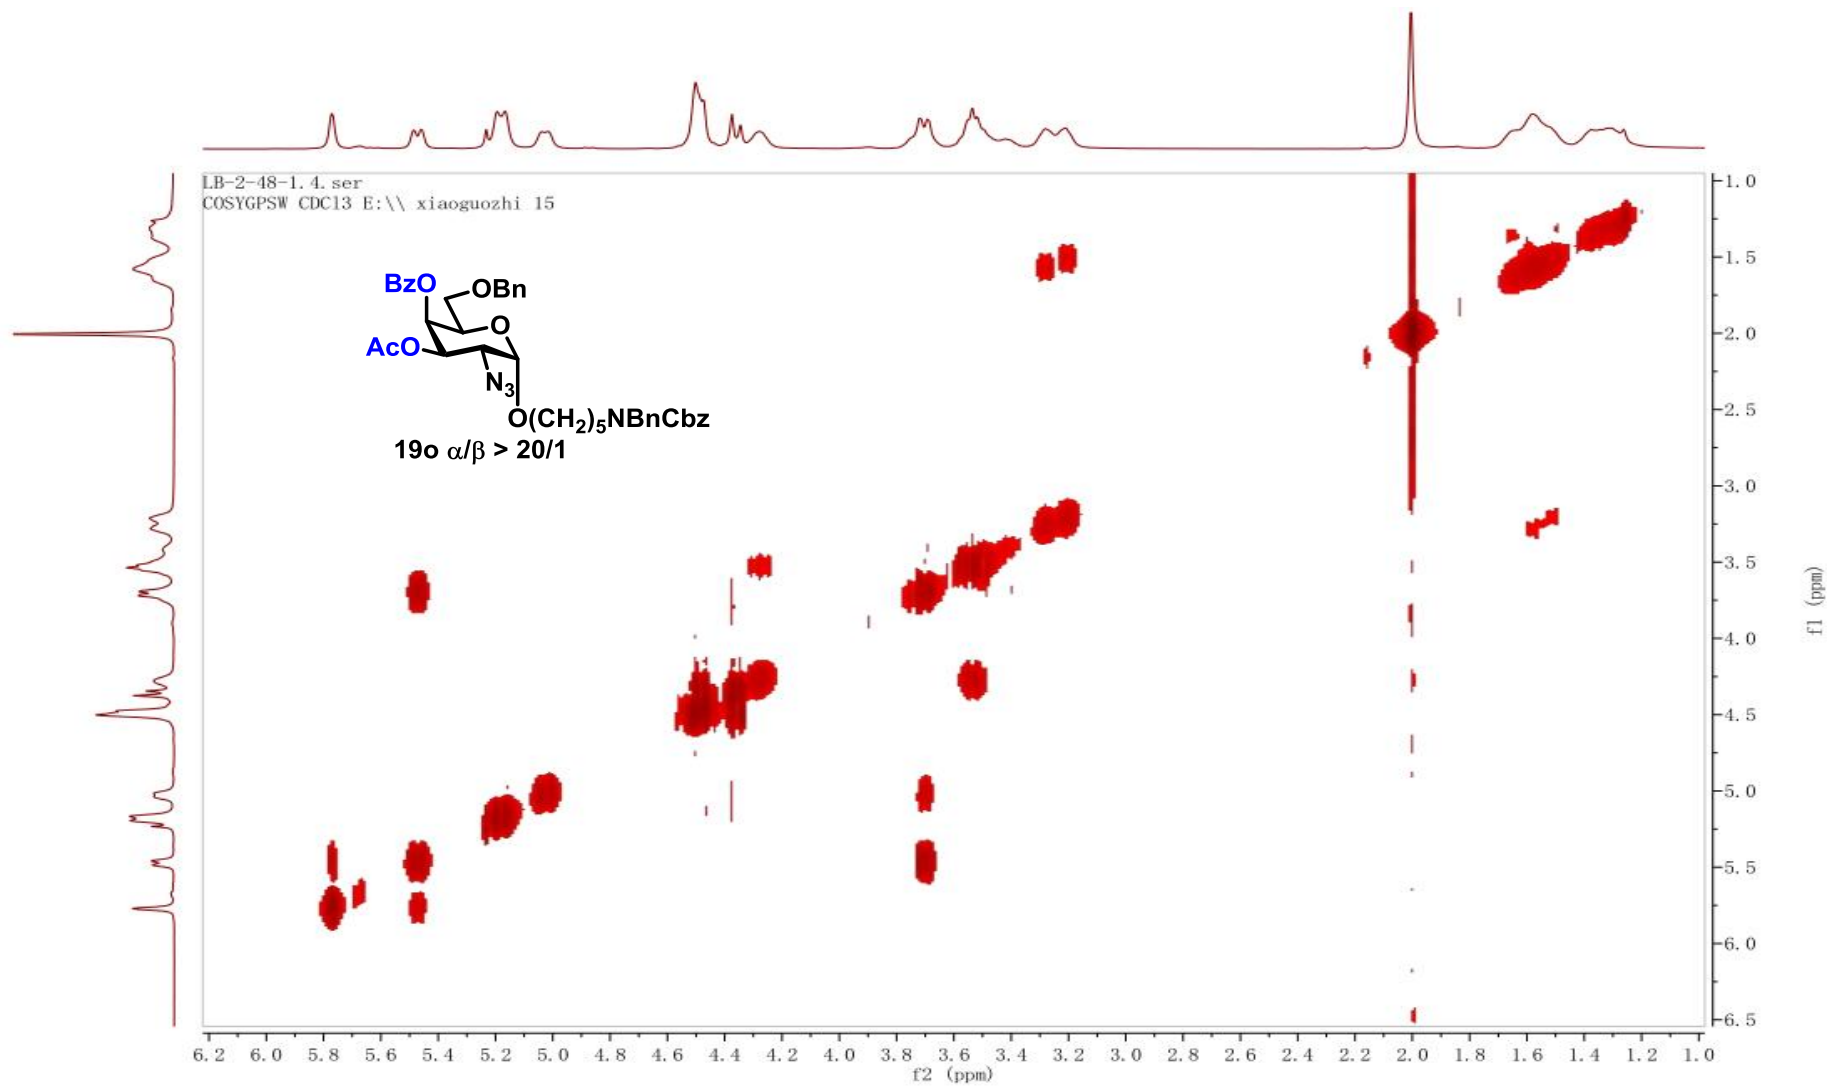

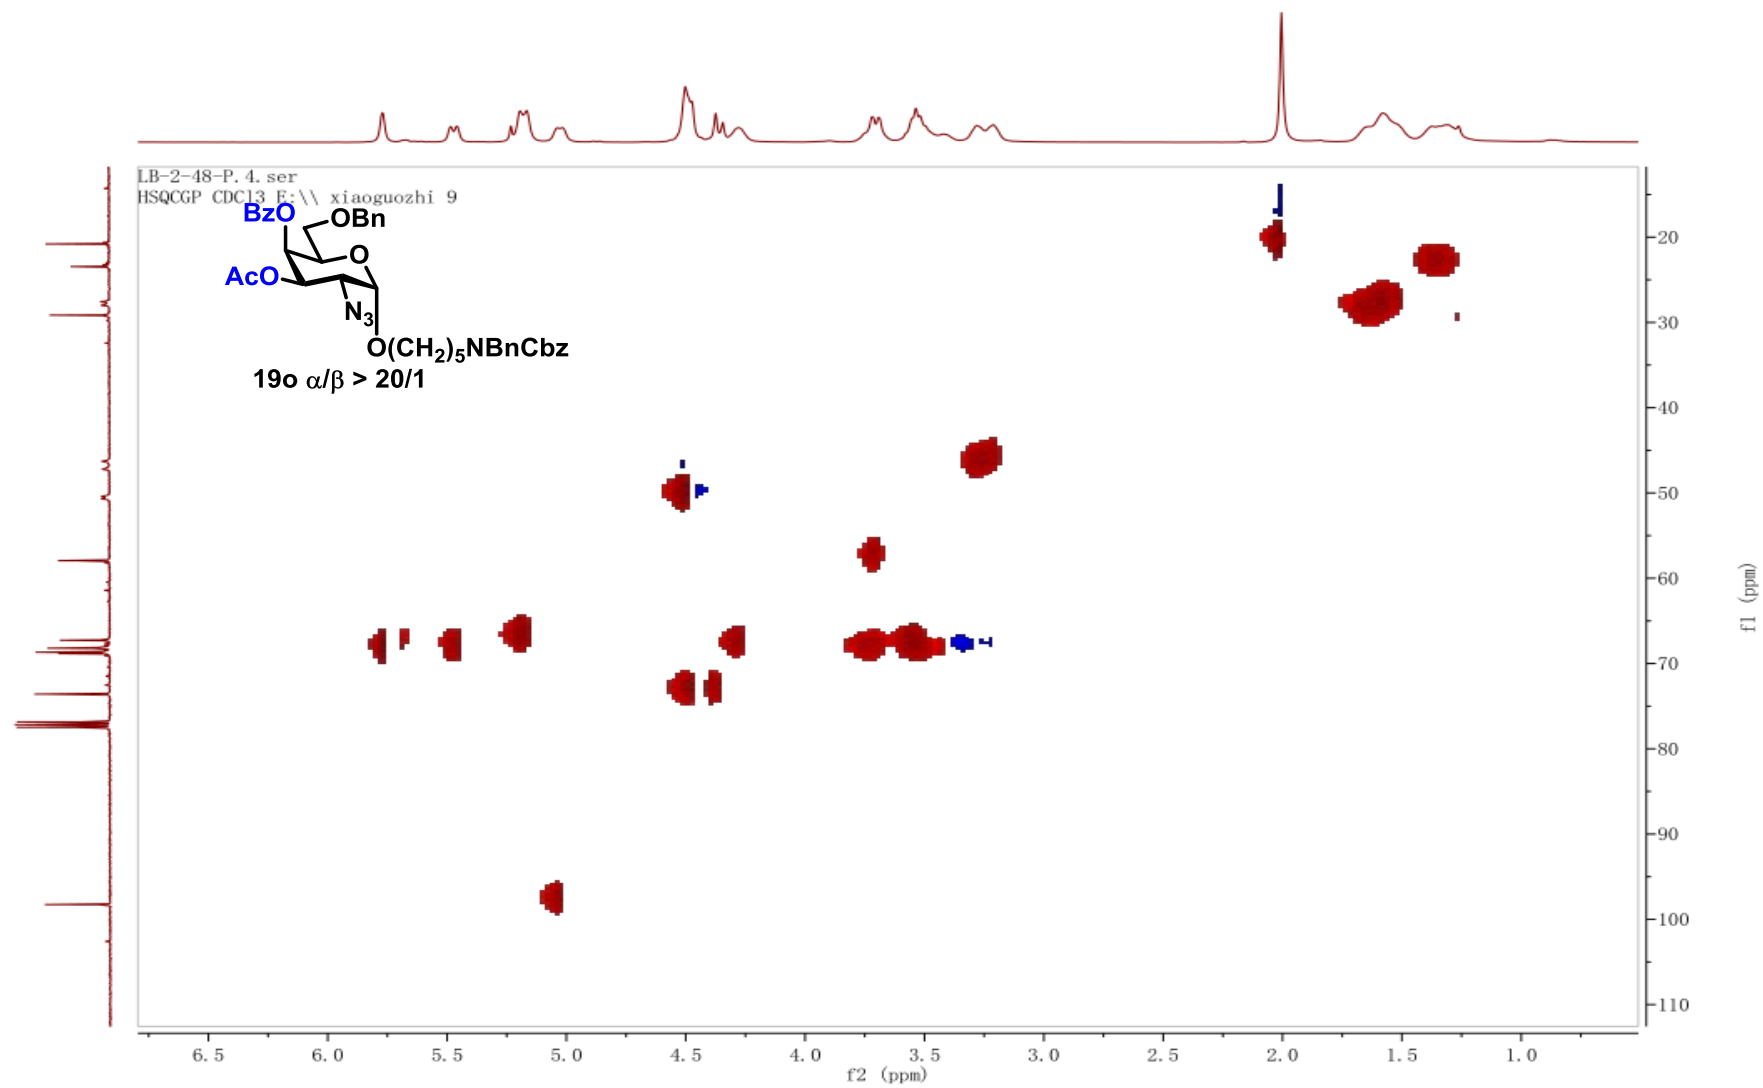

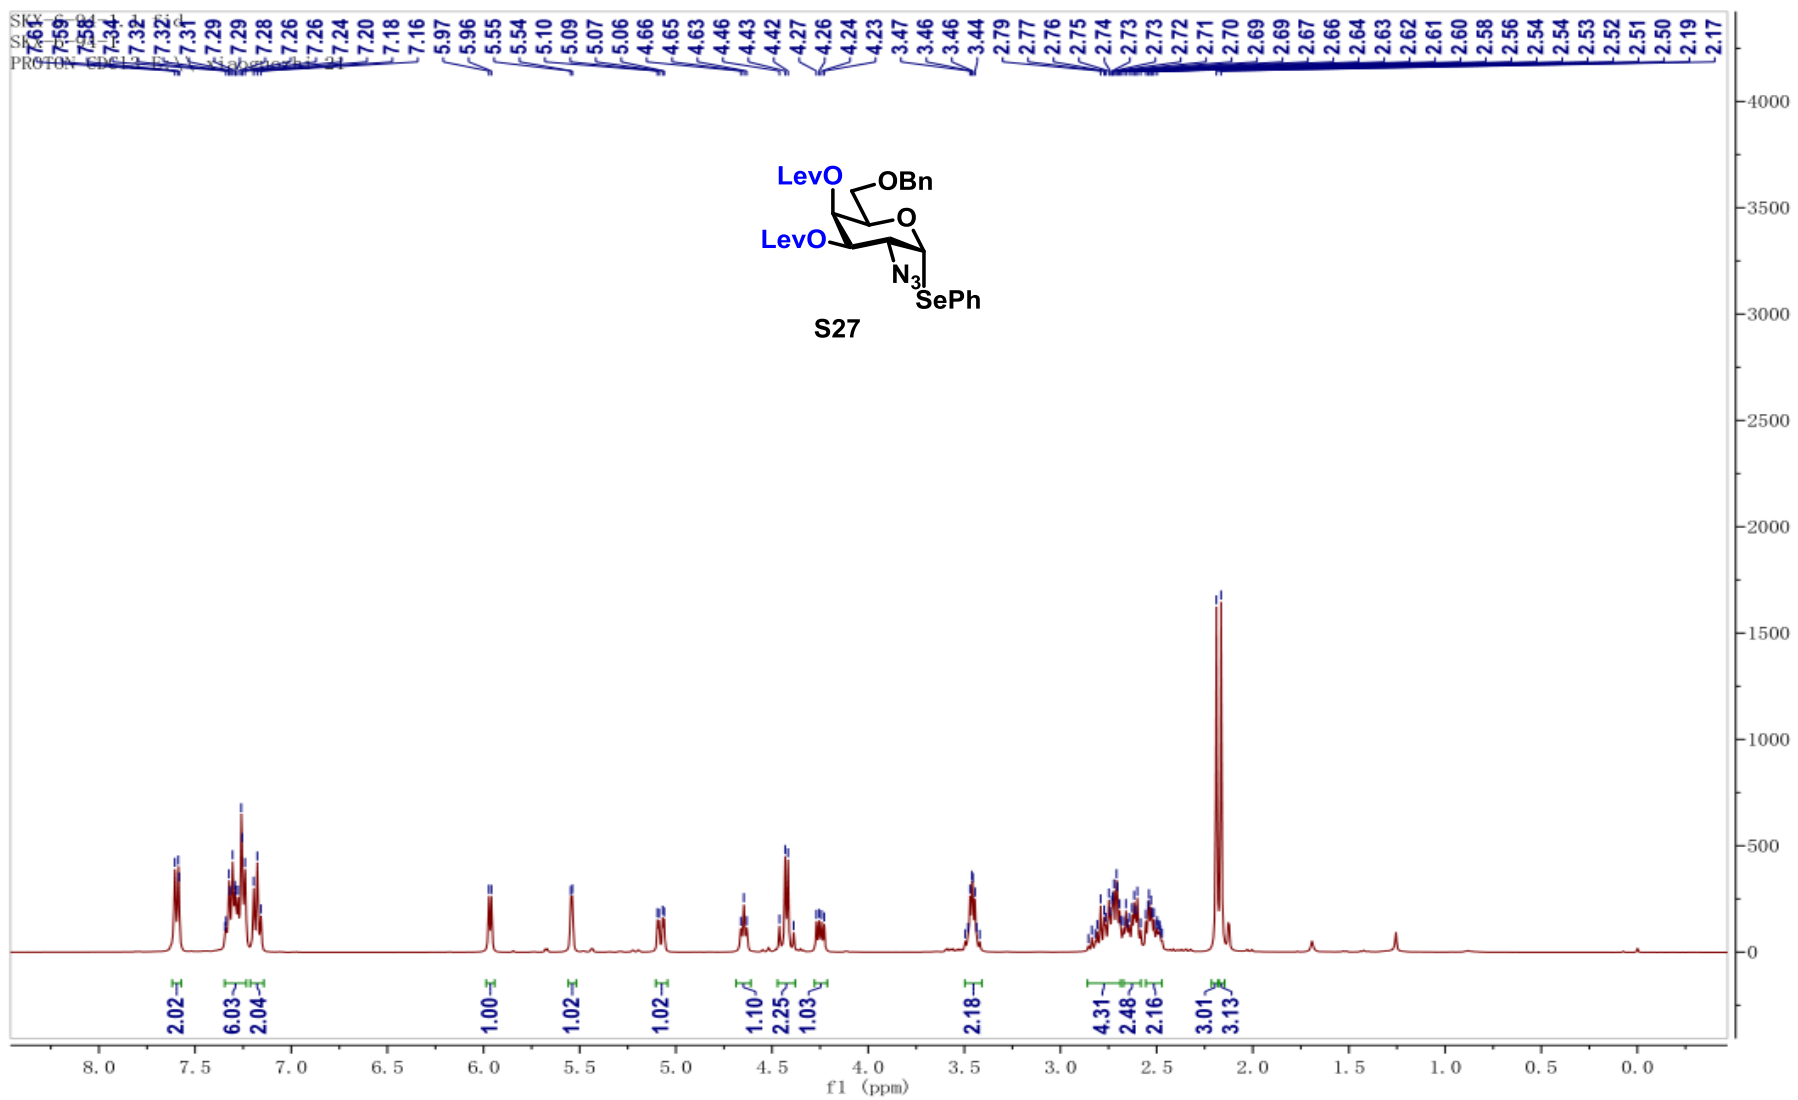

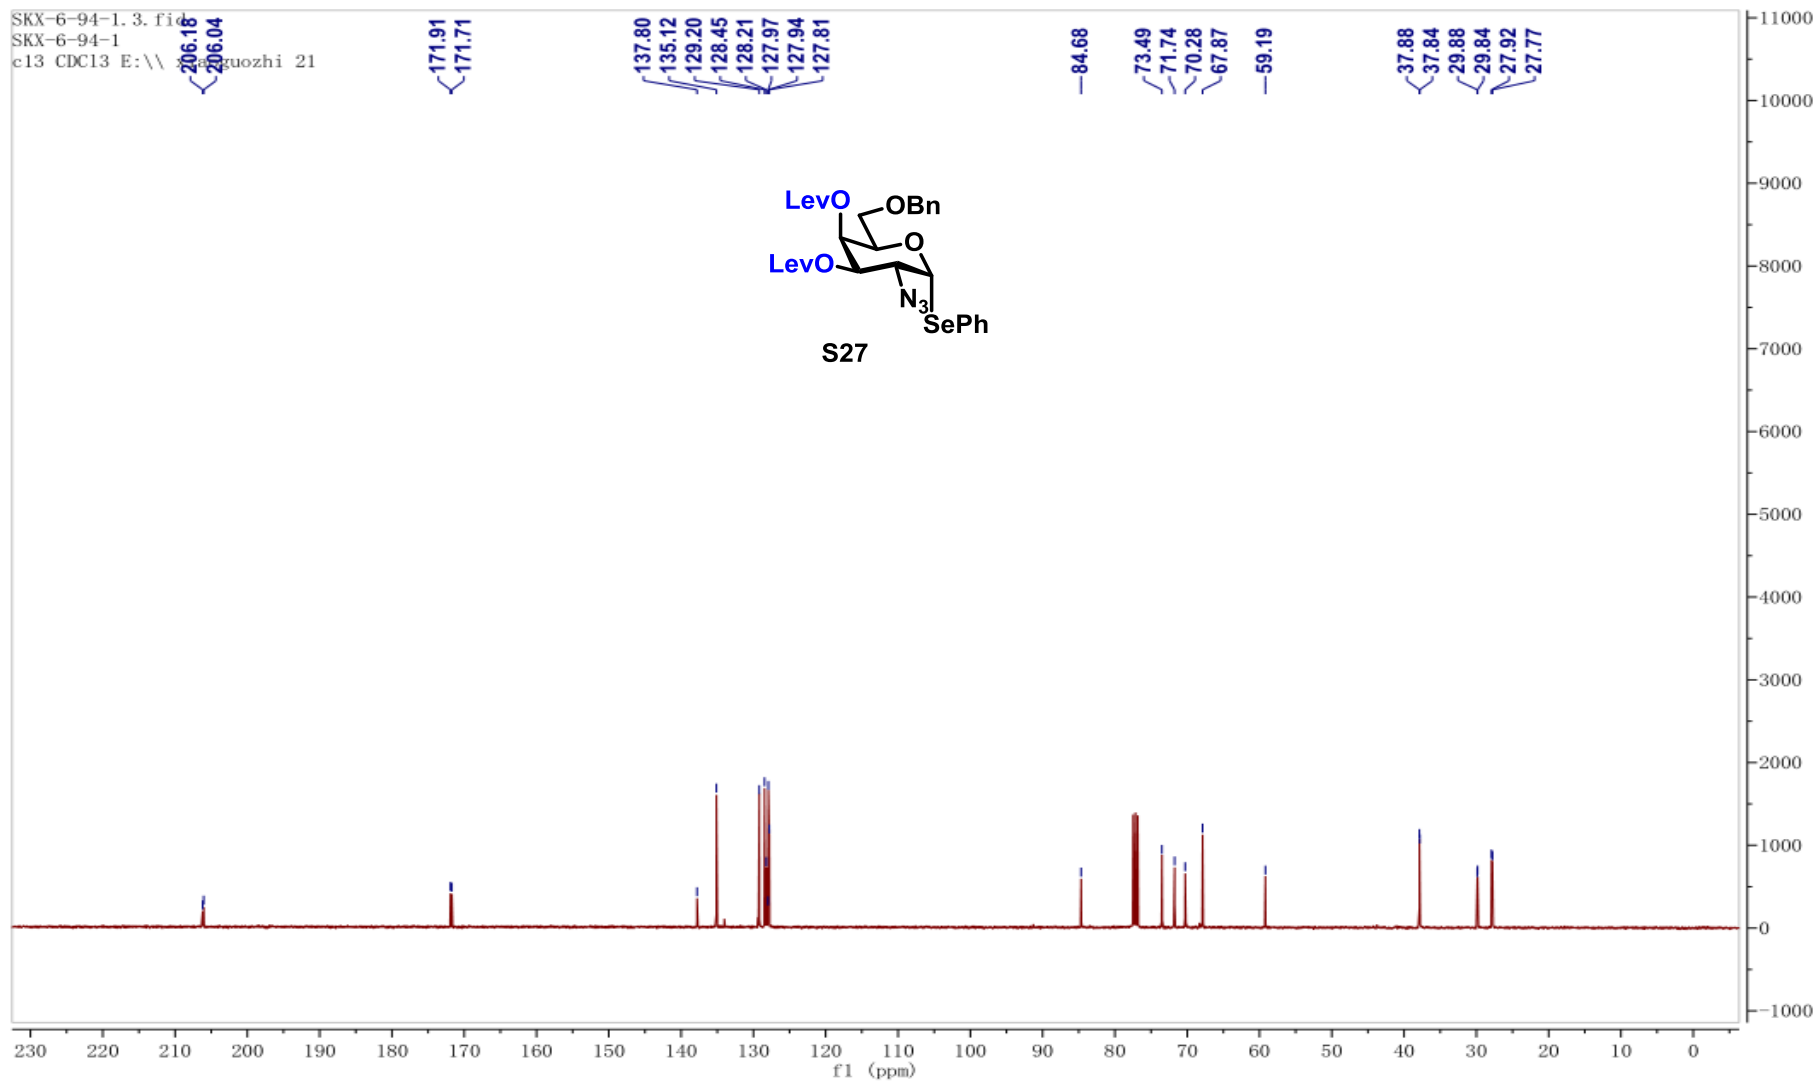



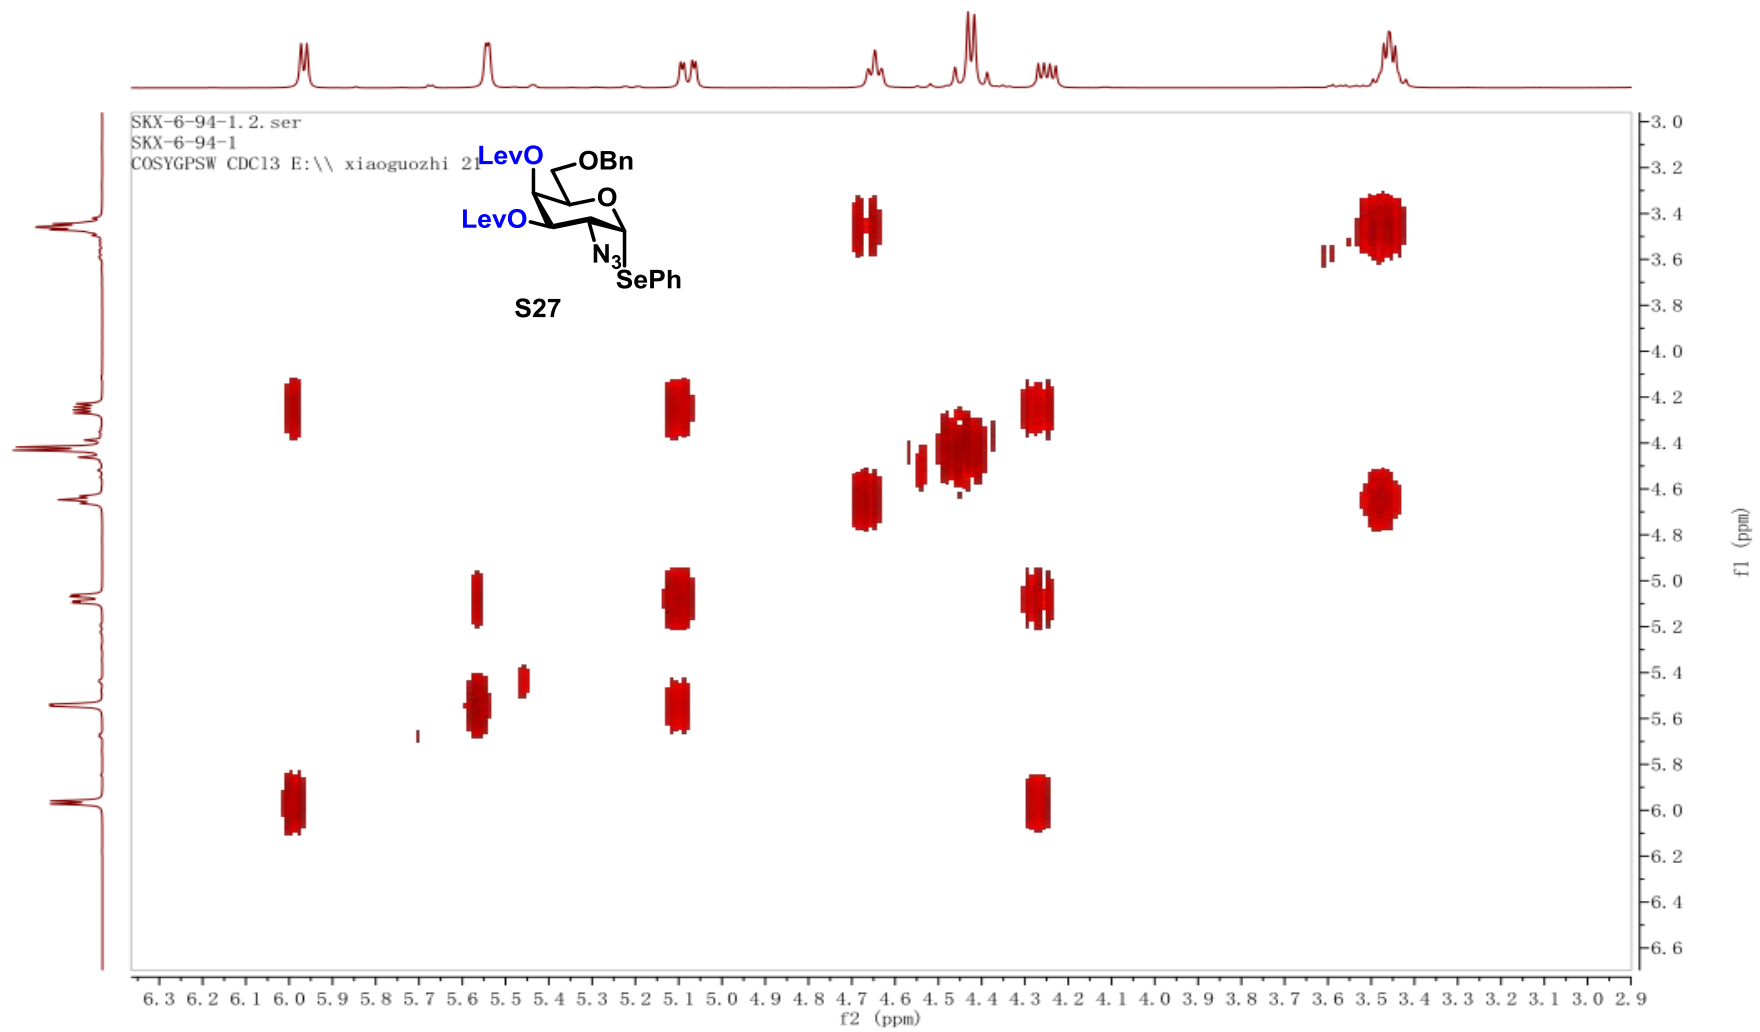

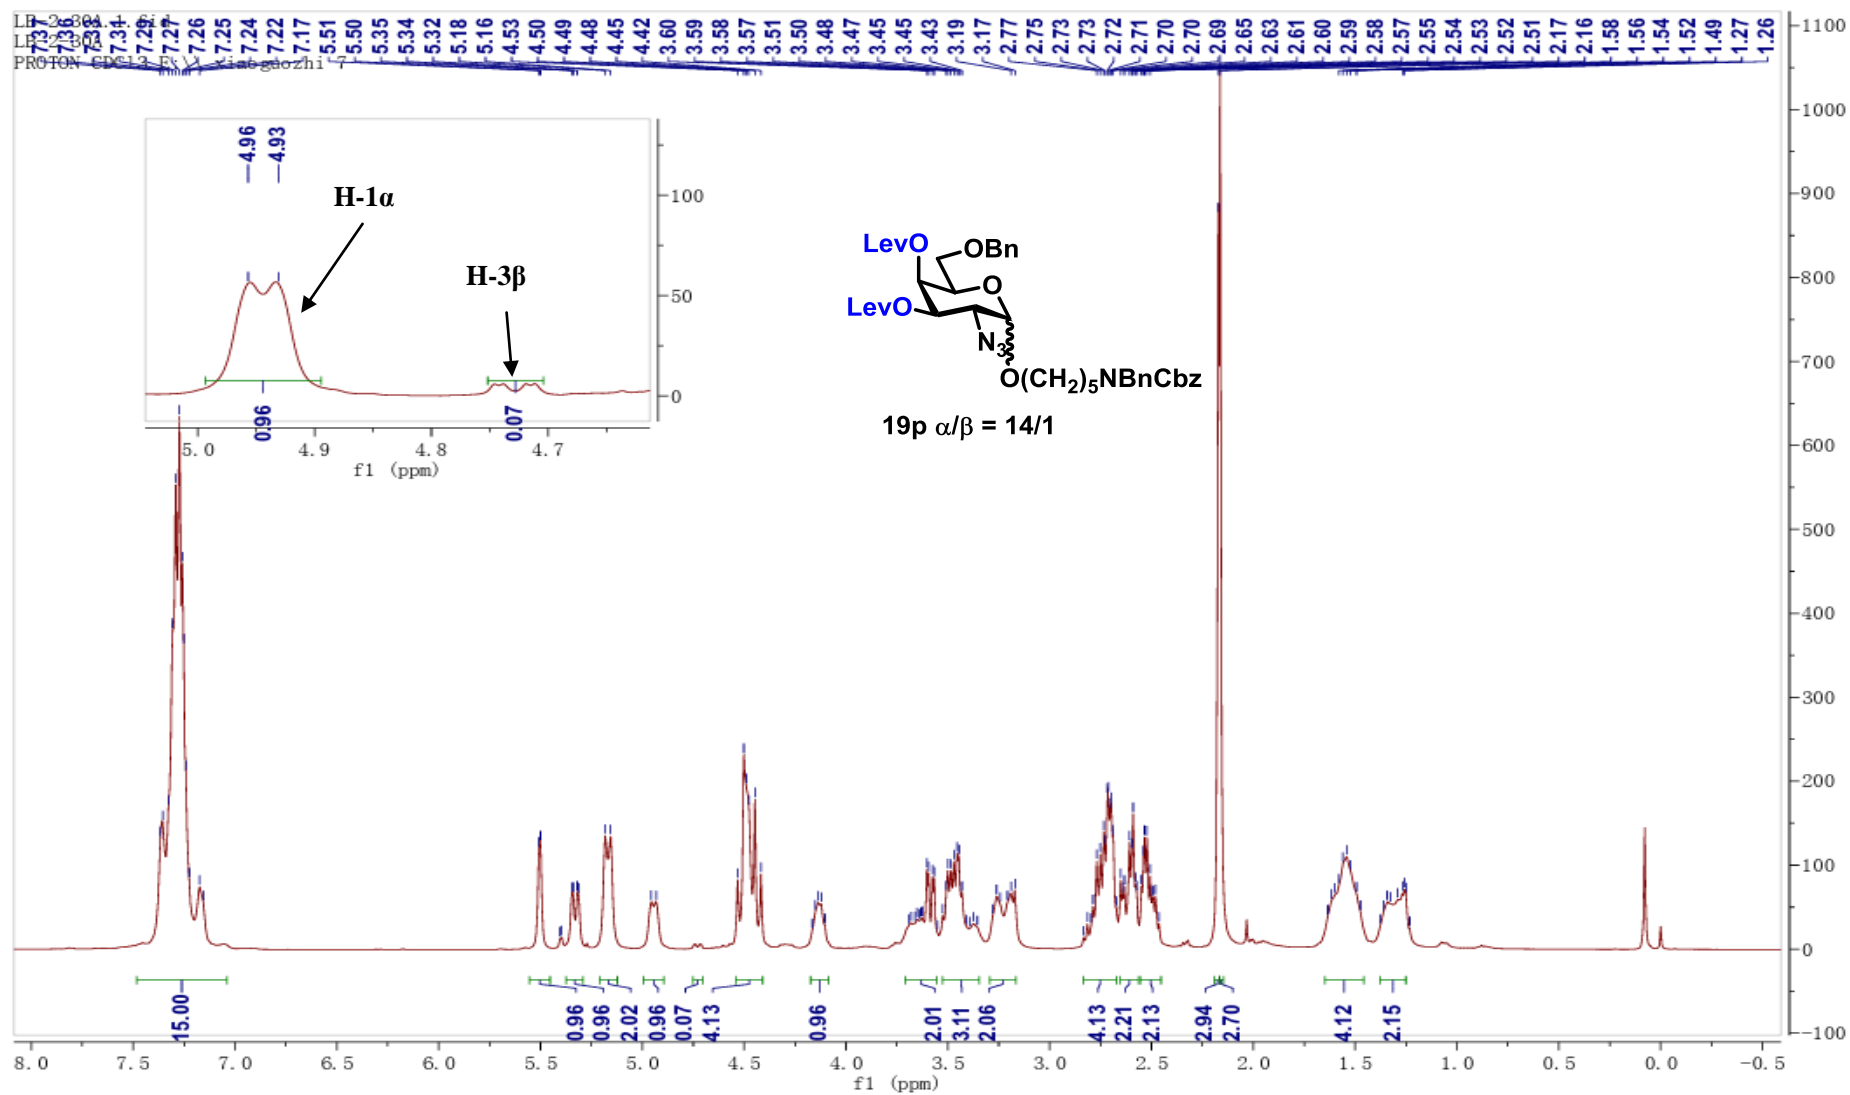

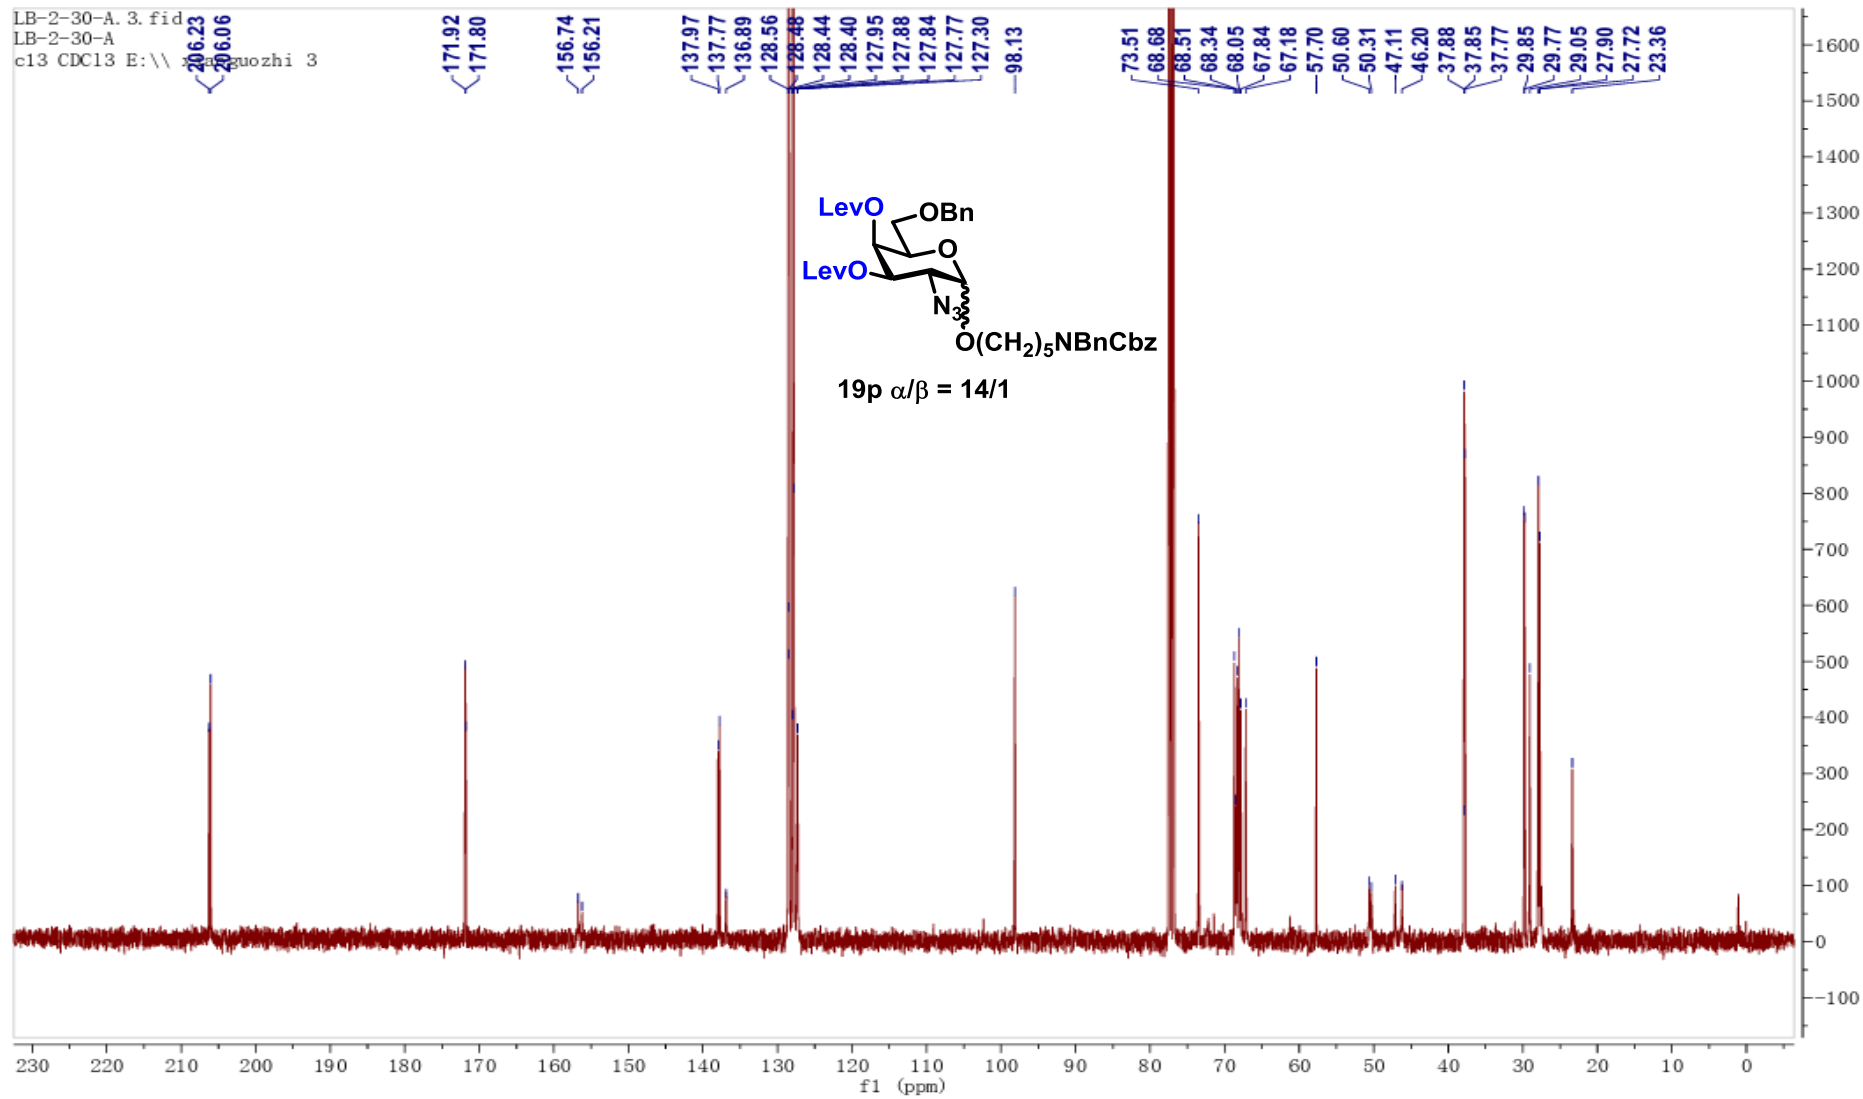

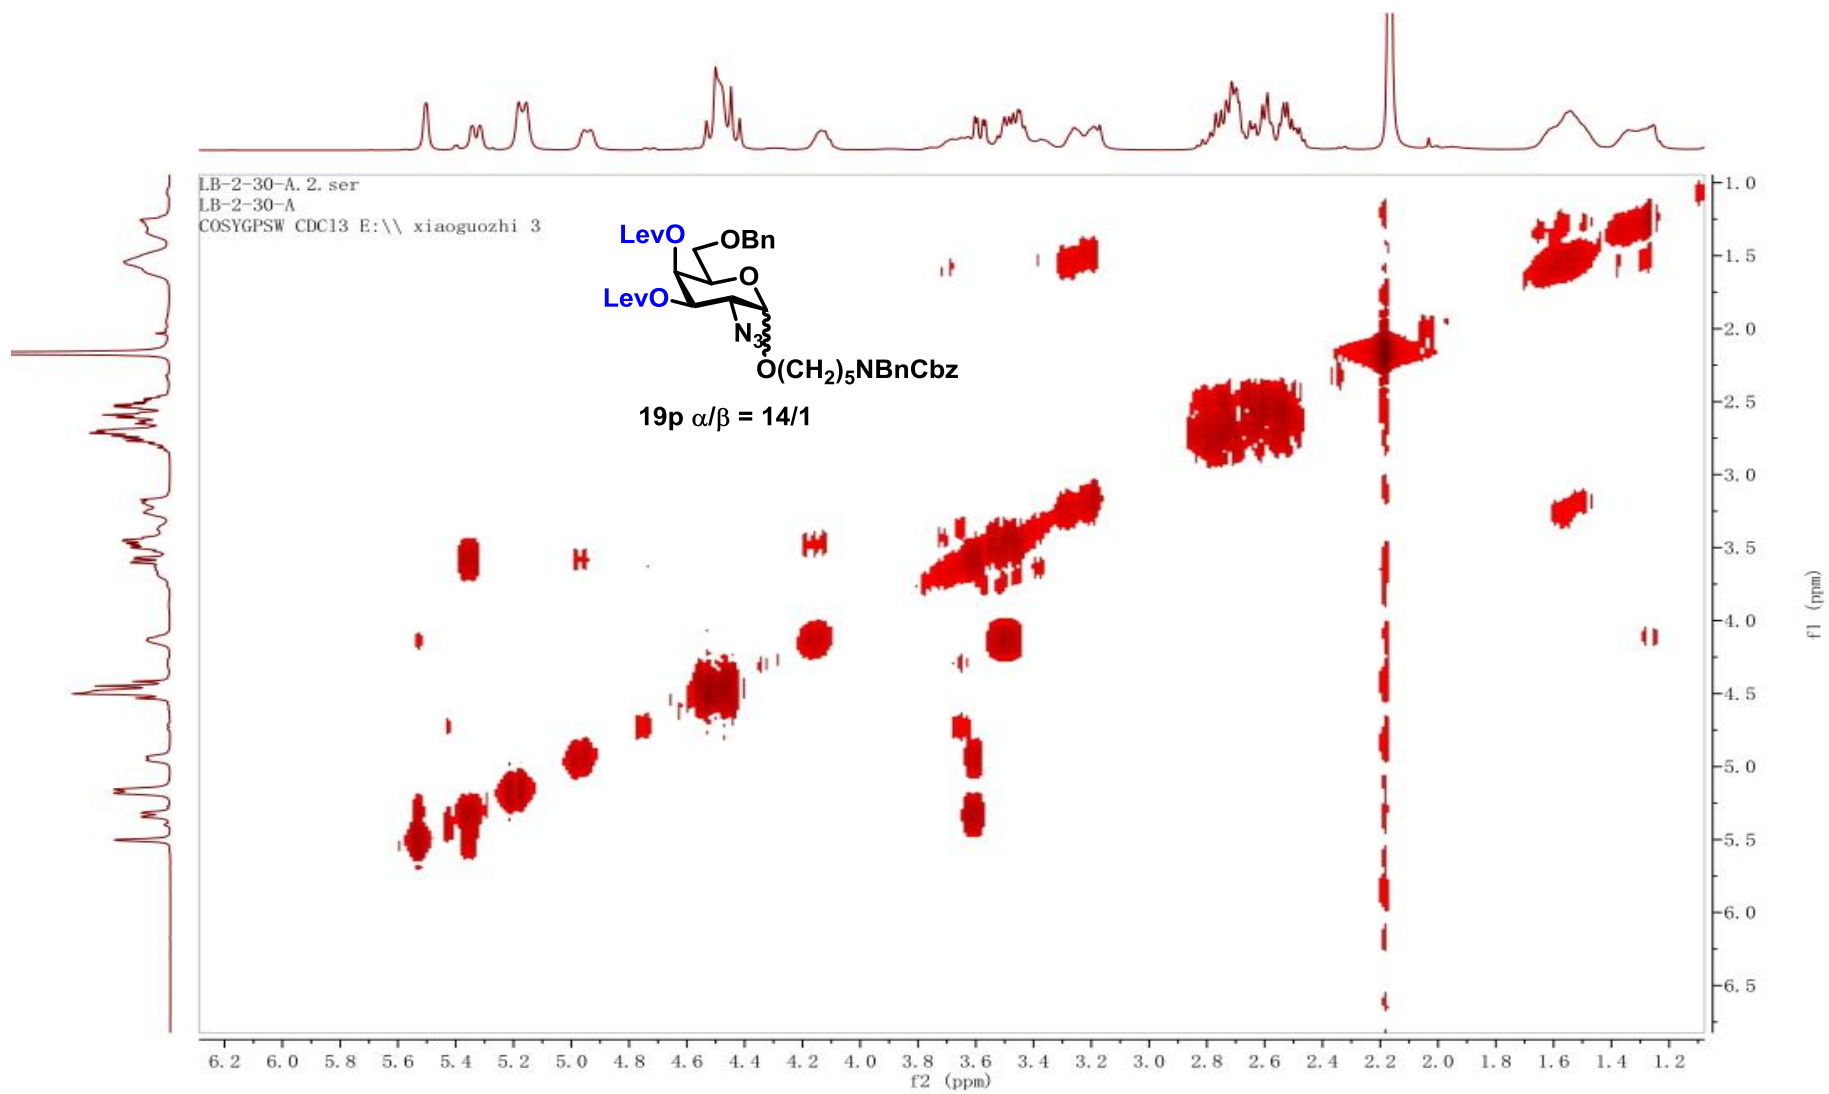

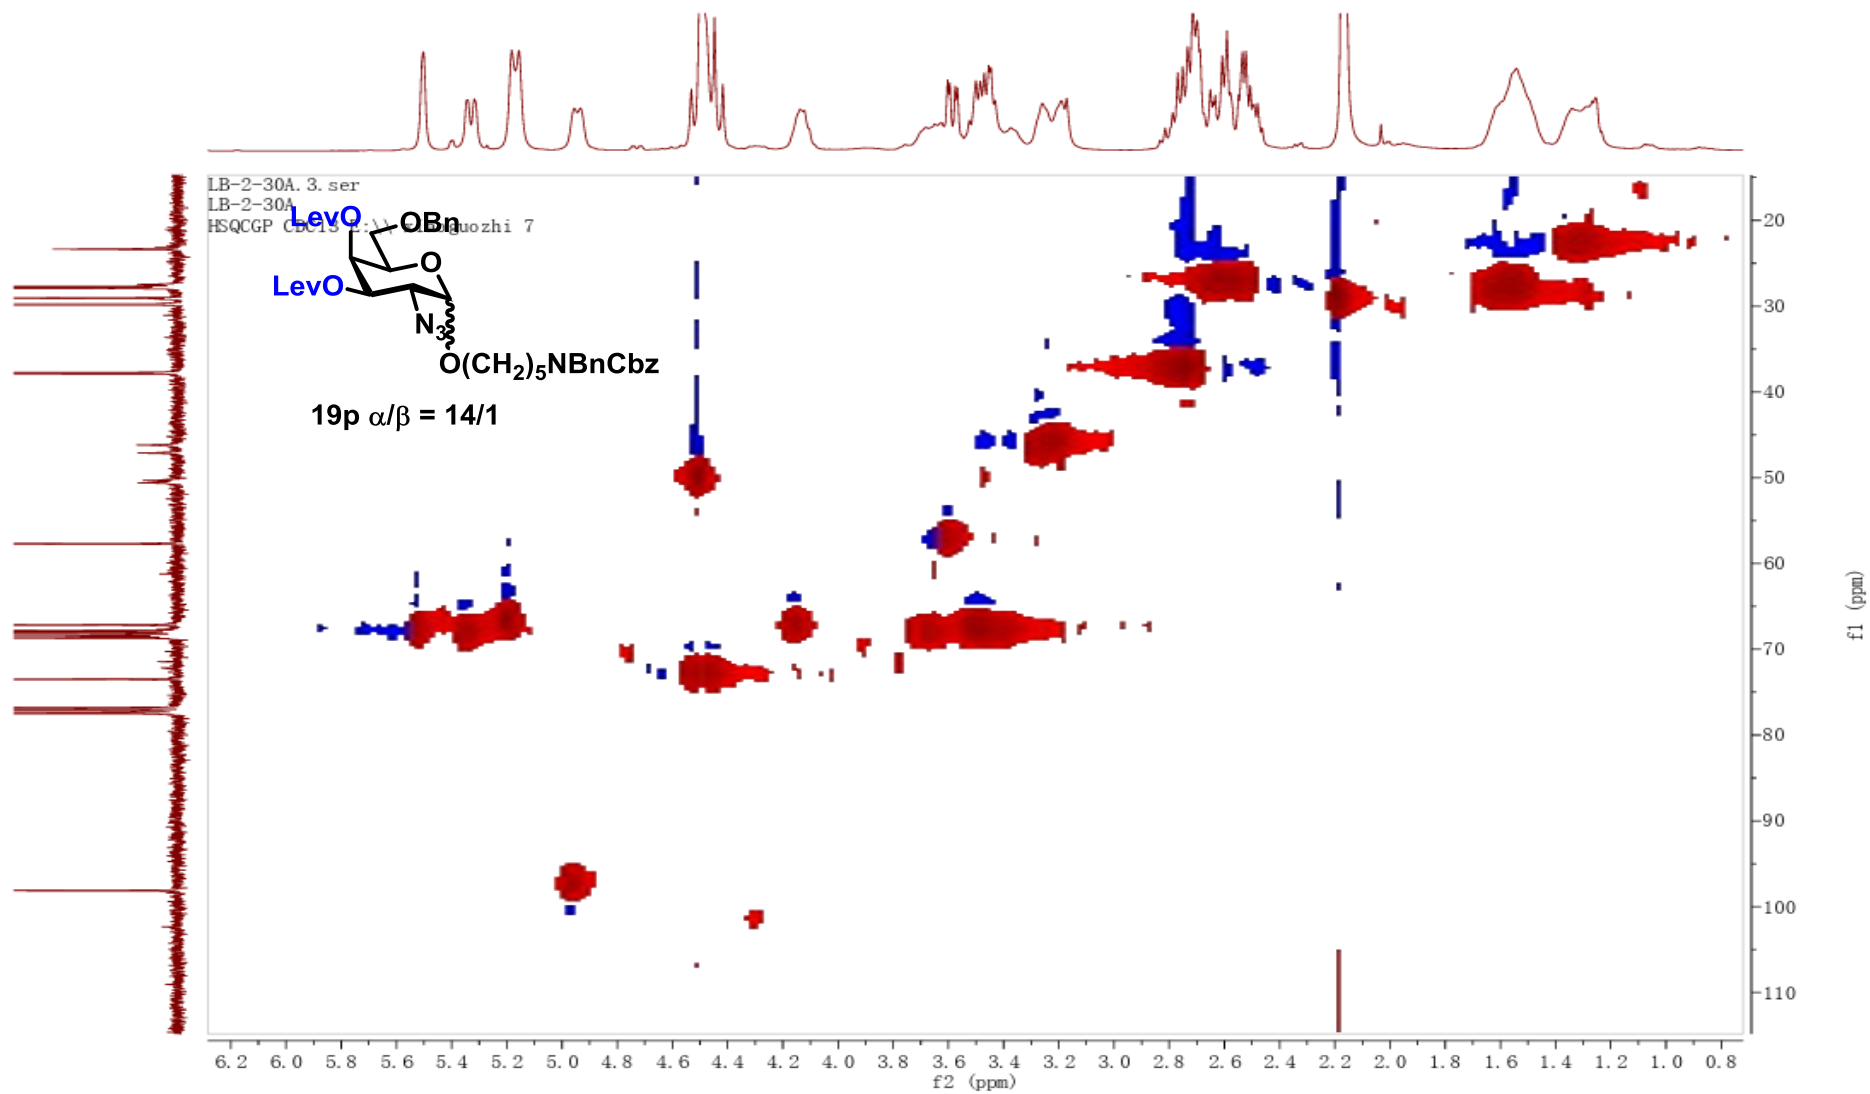

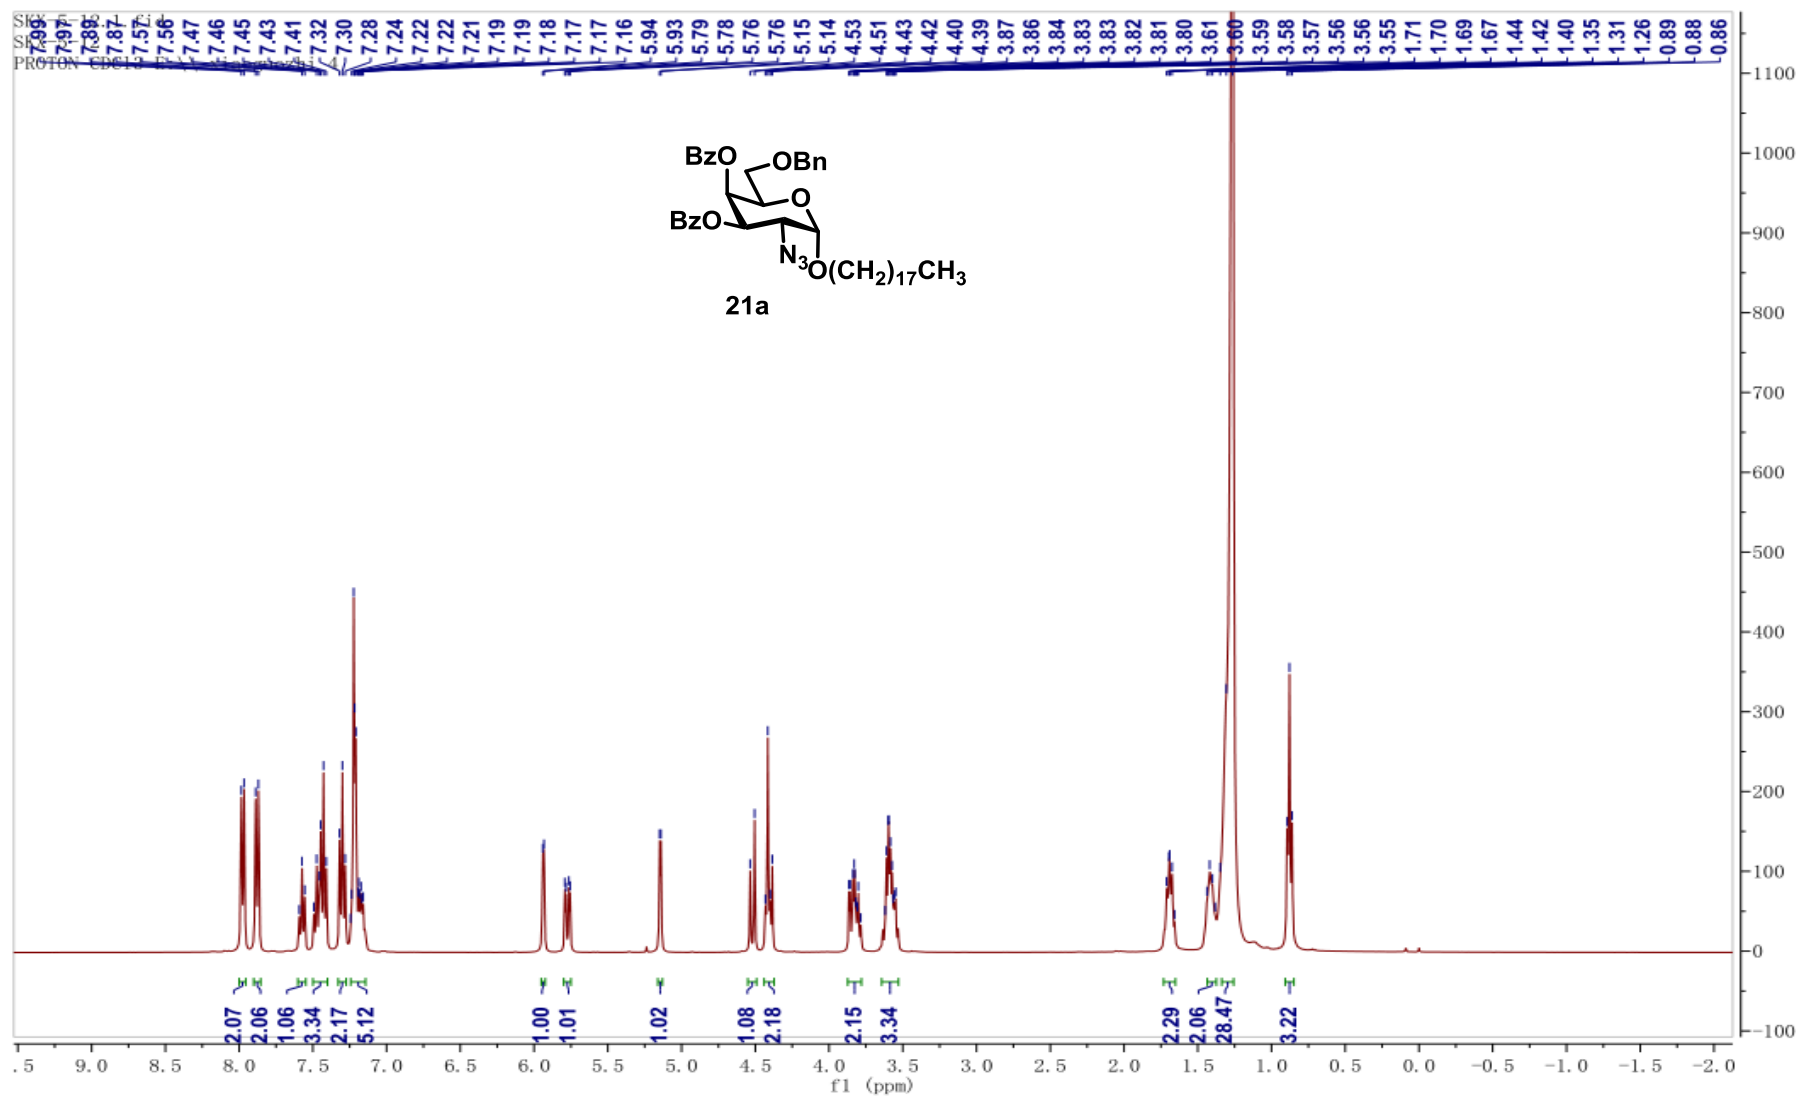

SKX-5-12.4.fid  
SKX-5-12  
c13 CDC13 E:\\ xiaoguozi 4

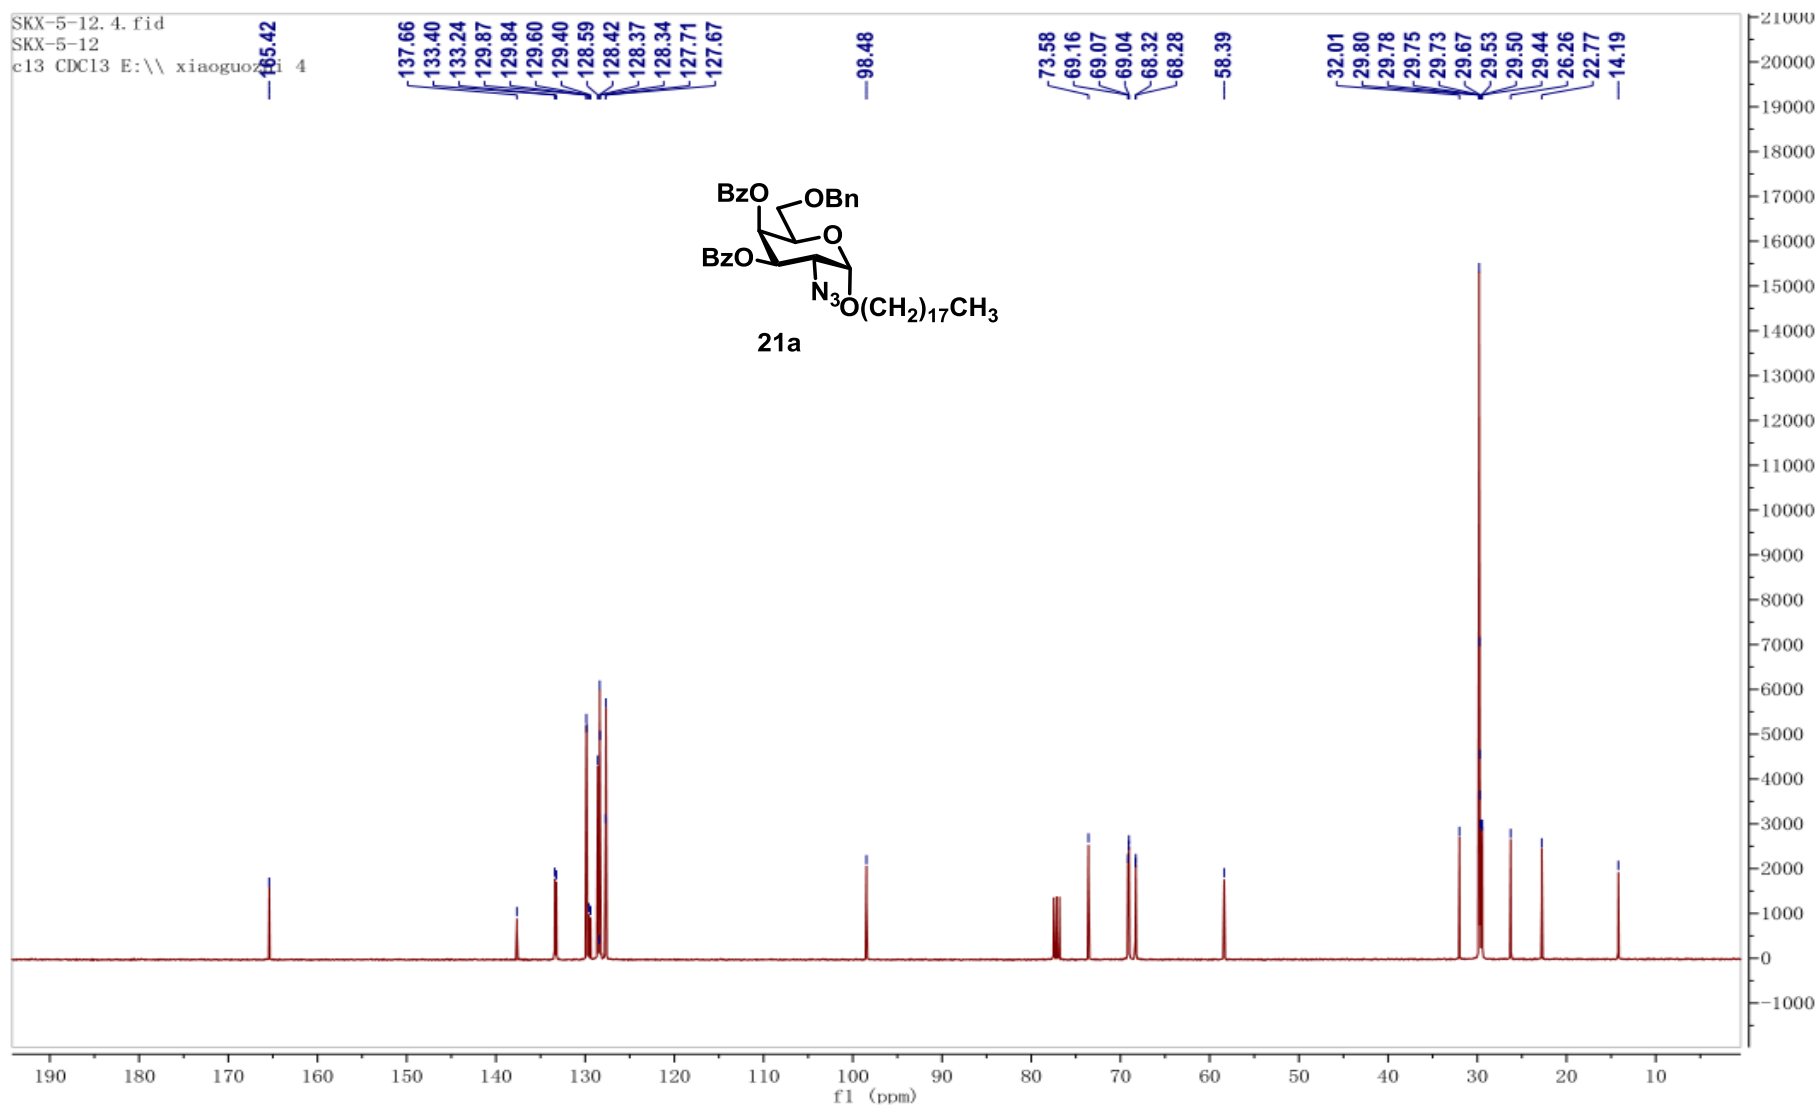

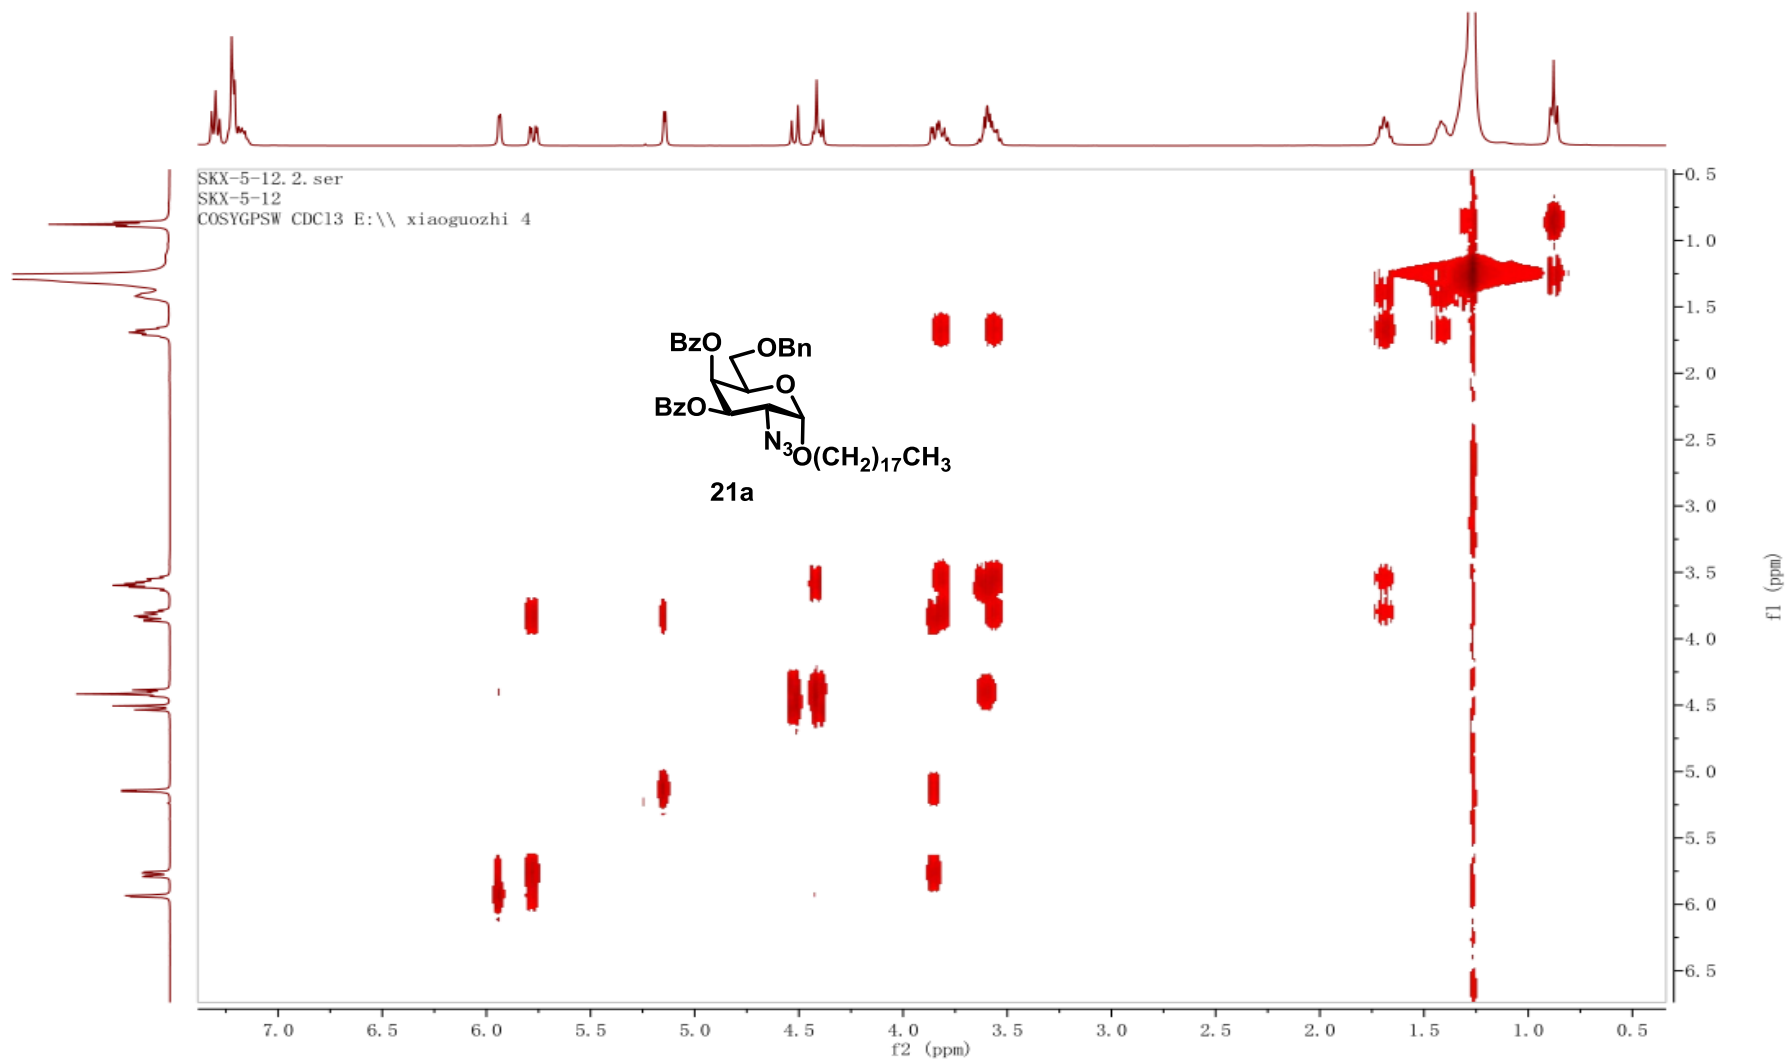



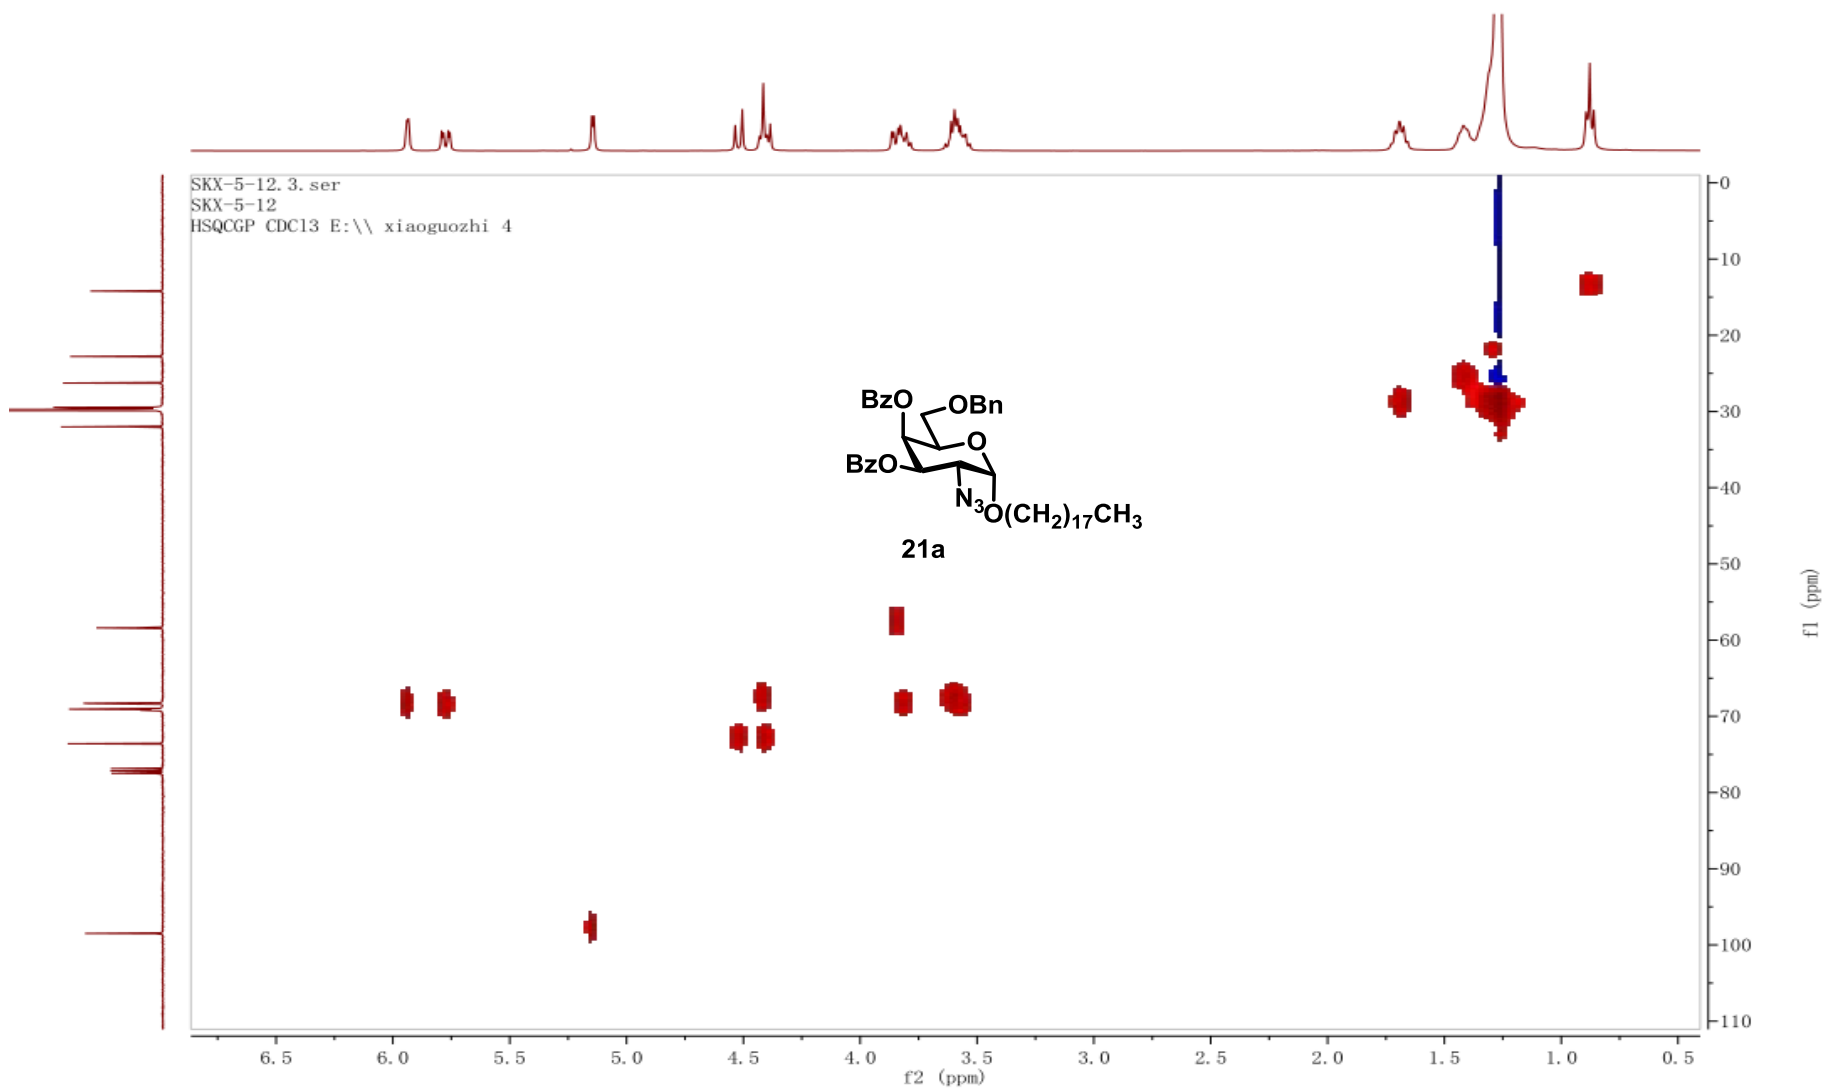

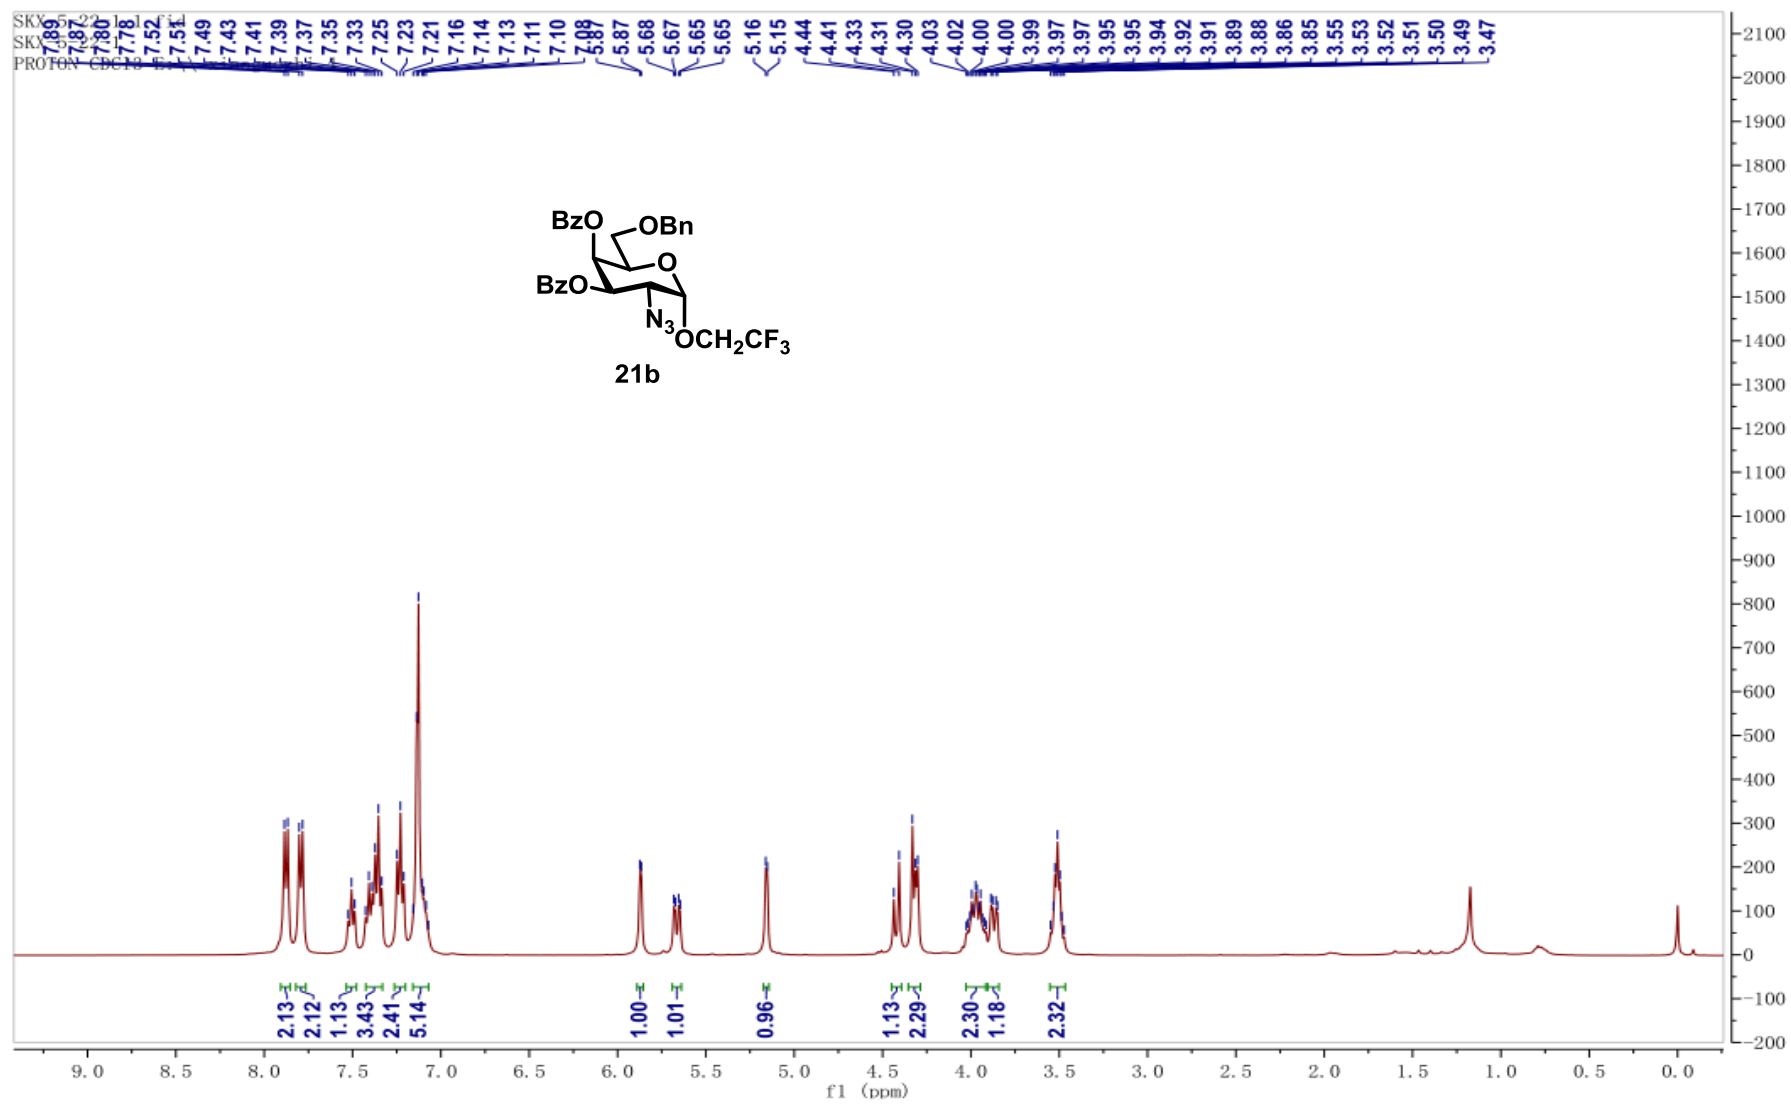

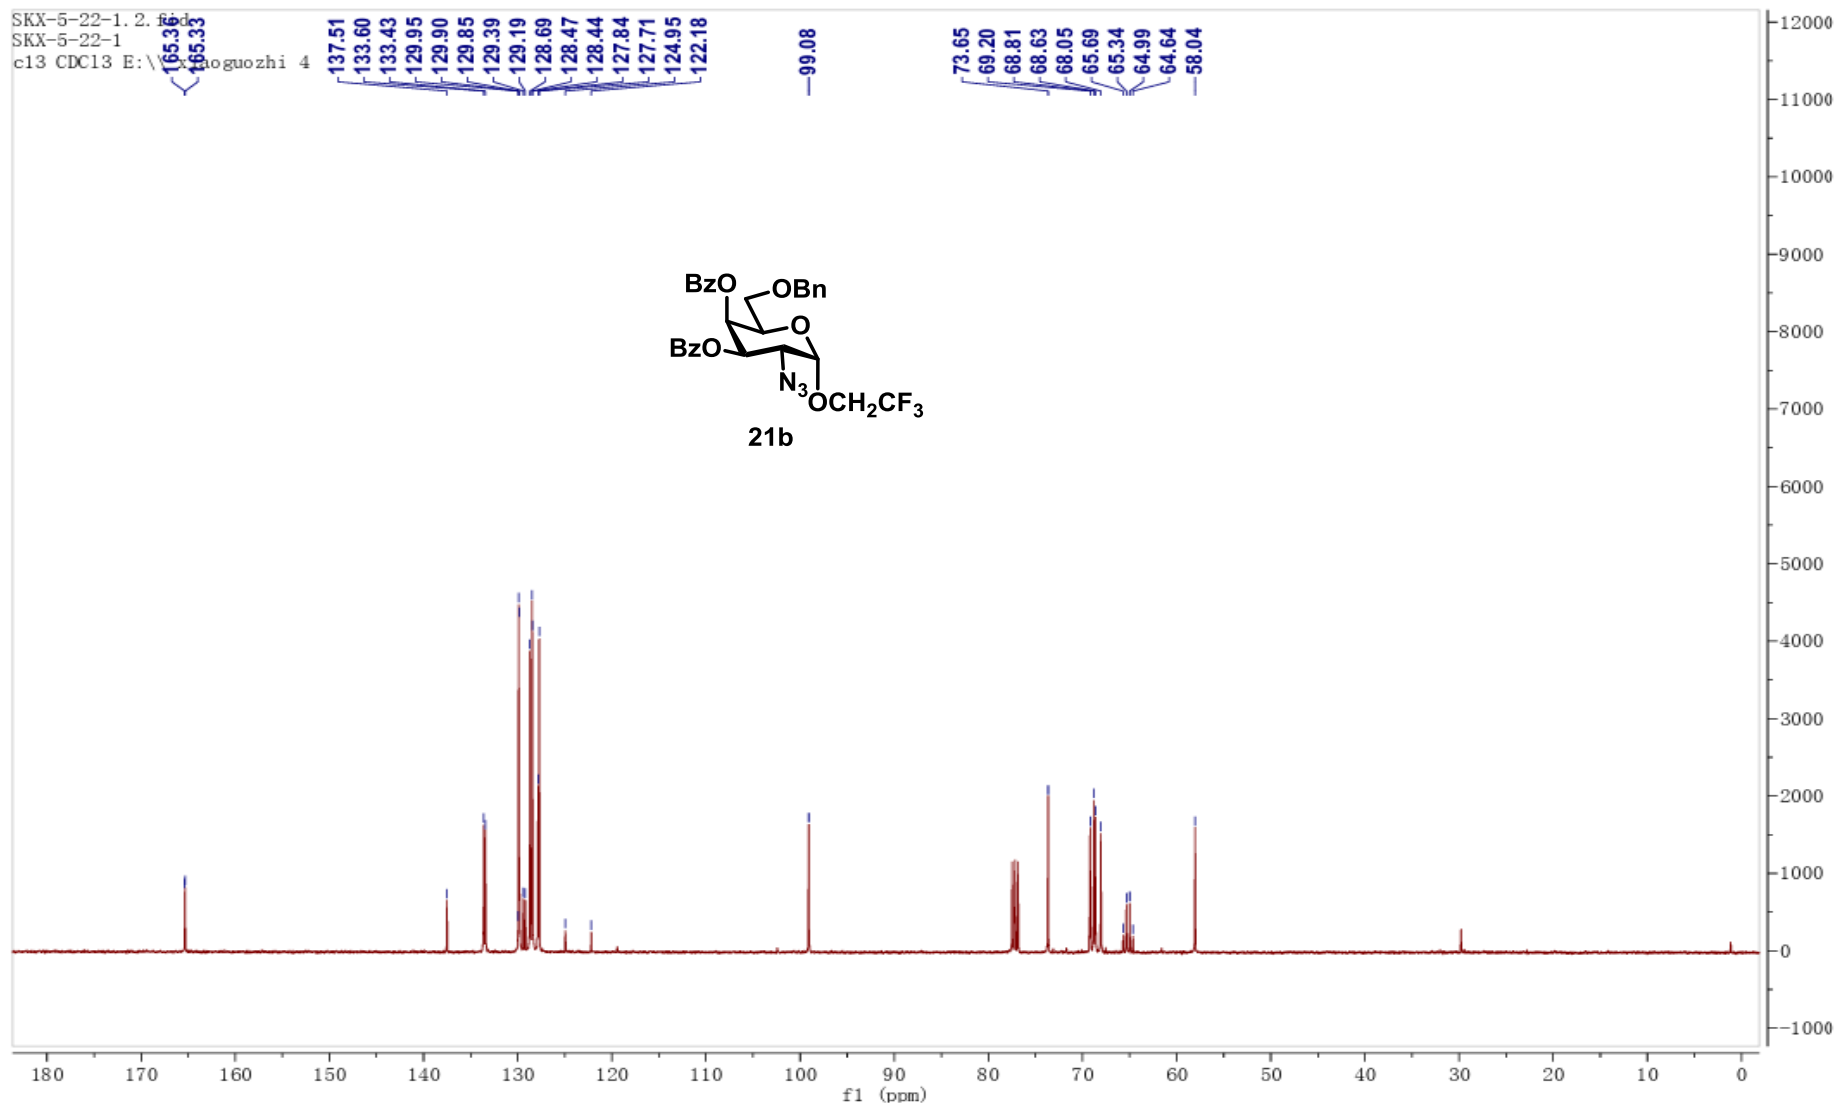

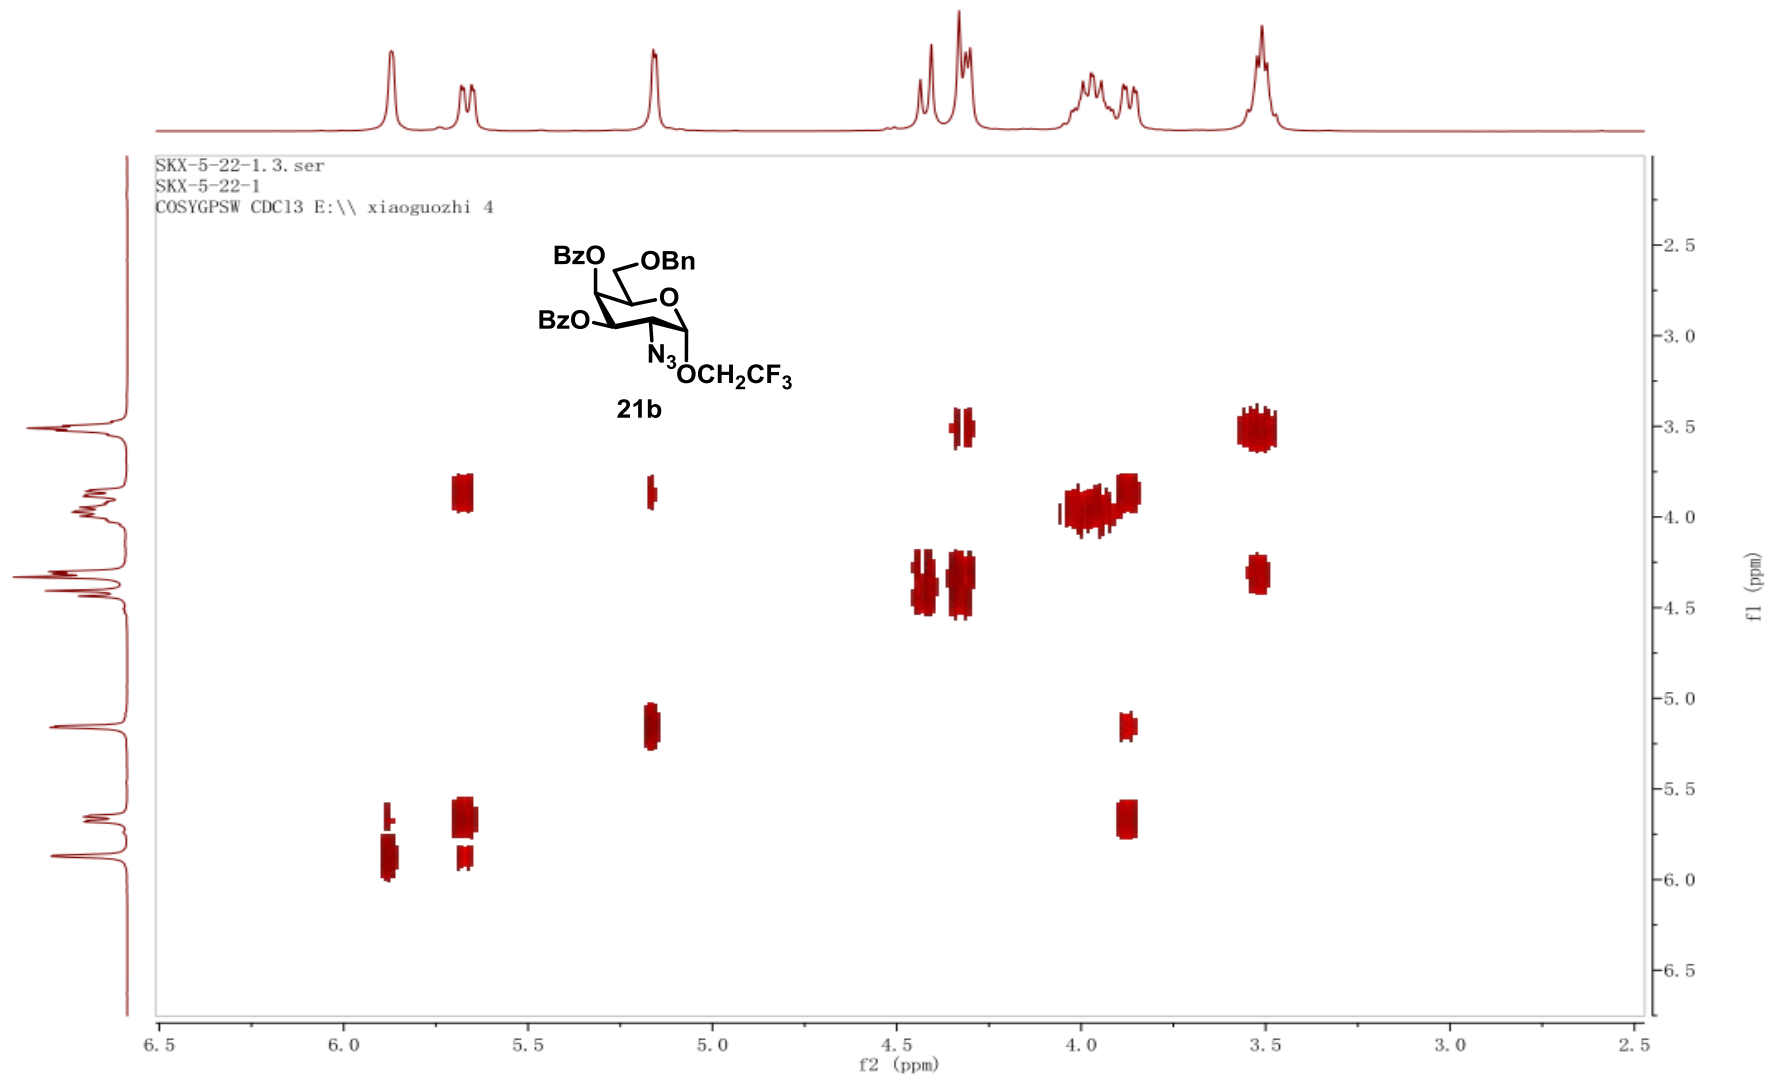

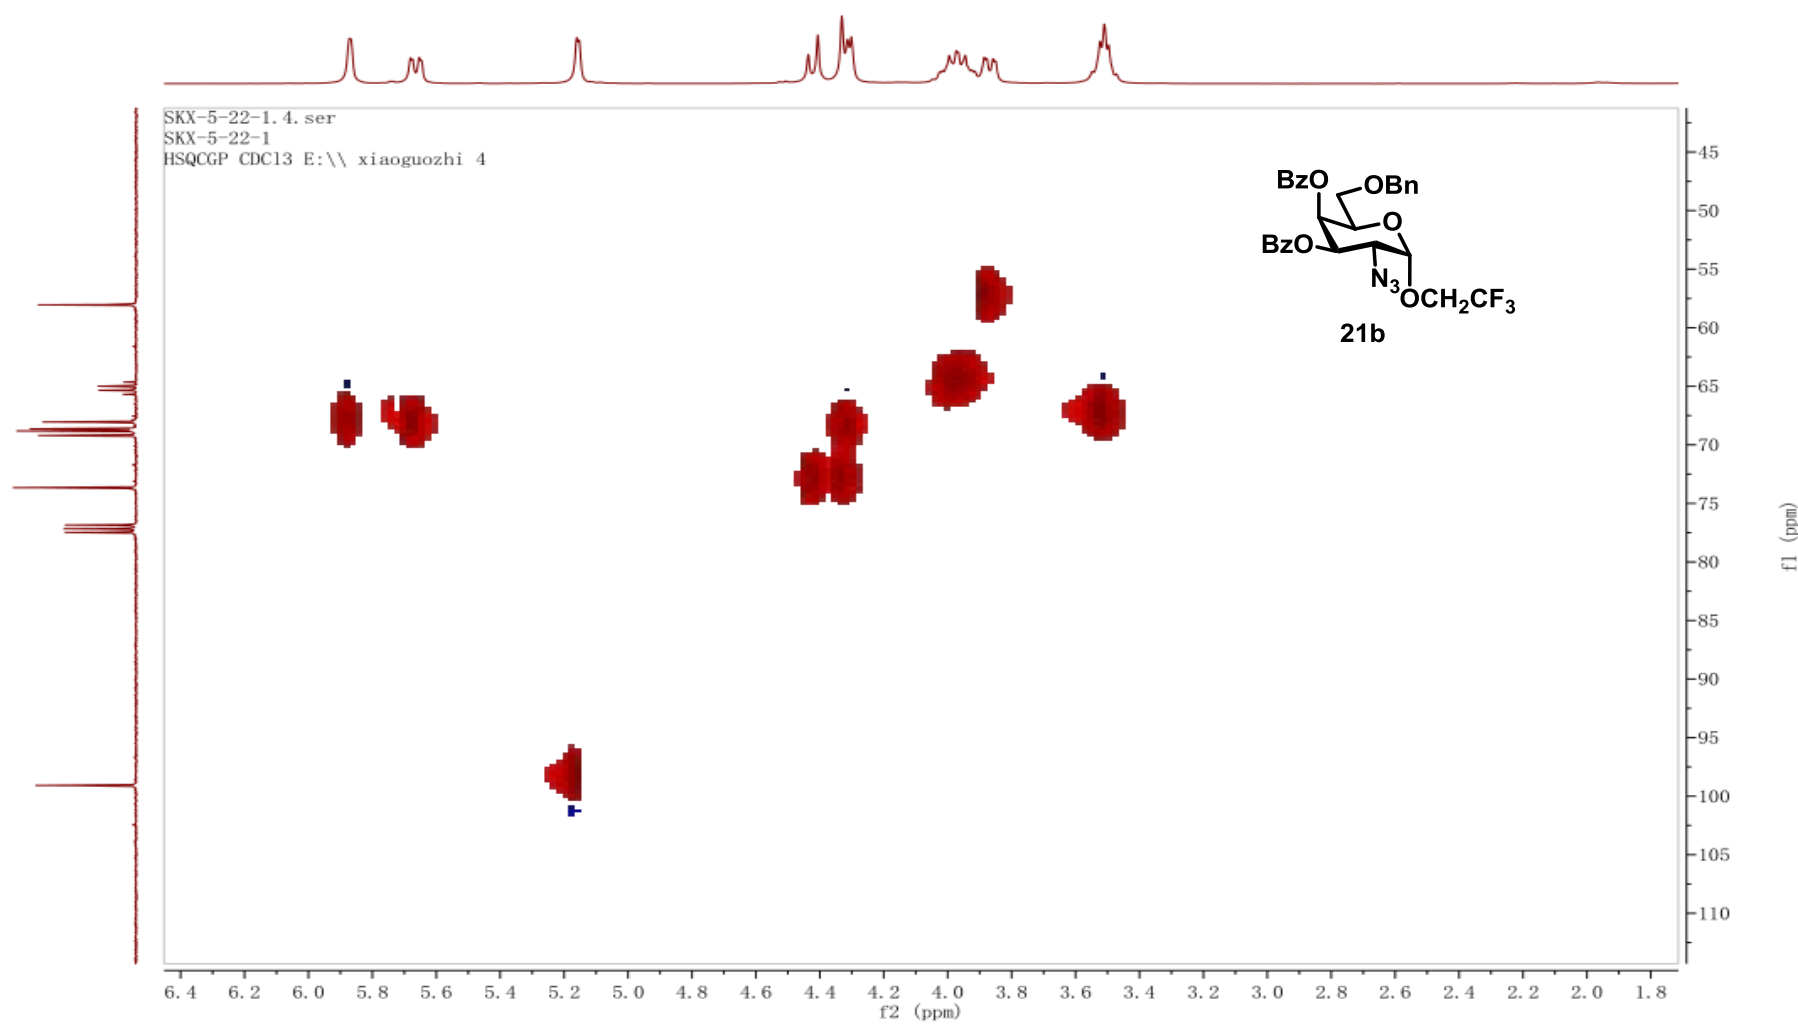

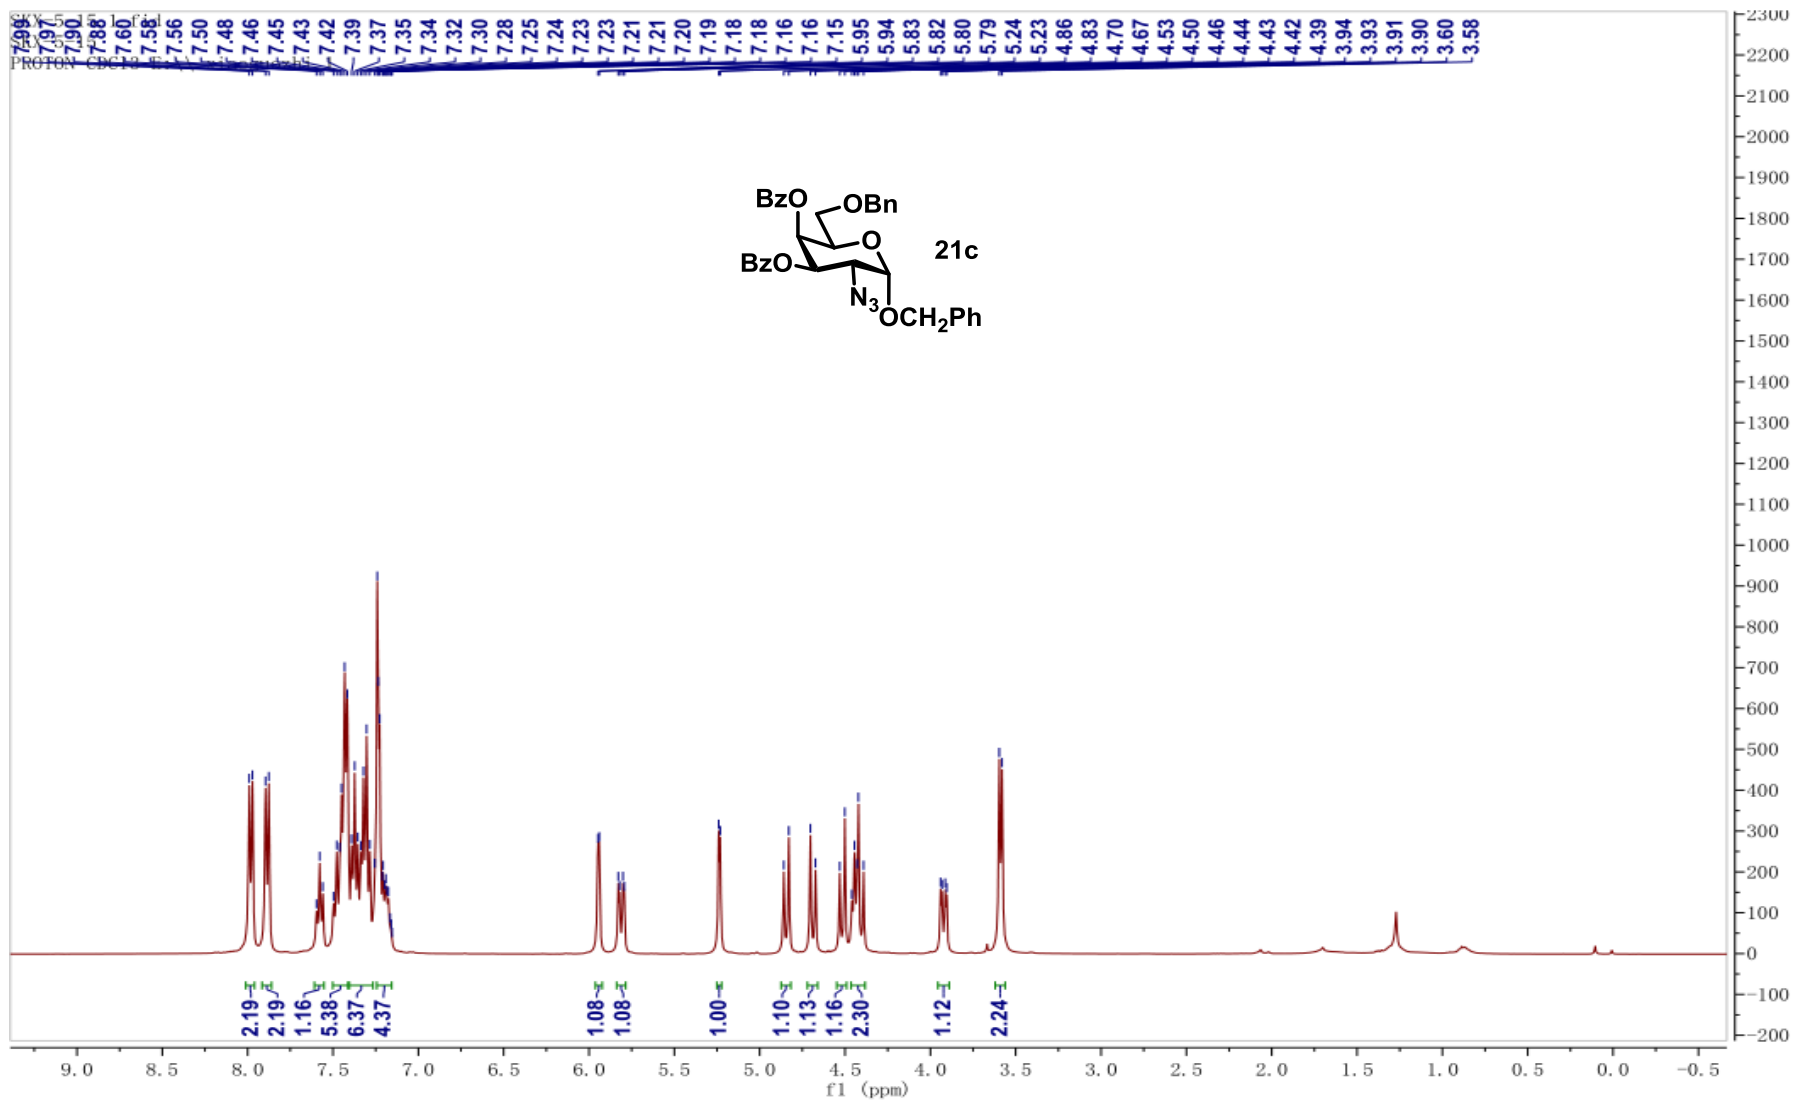

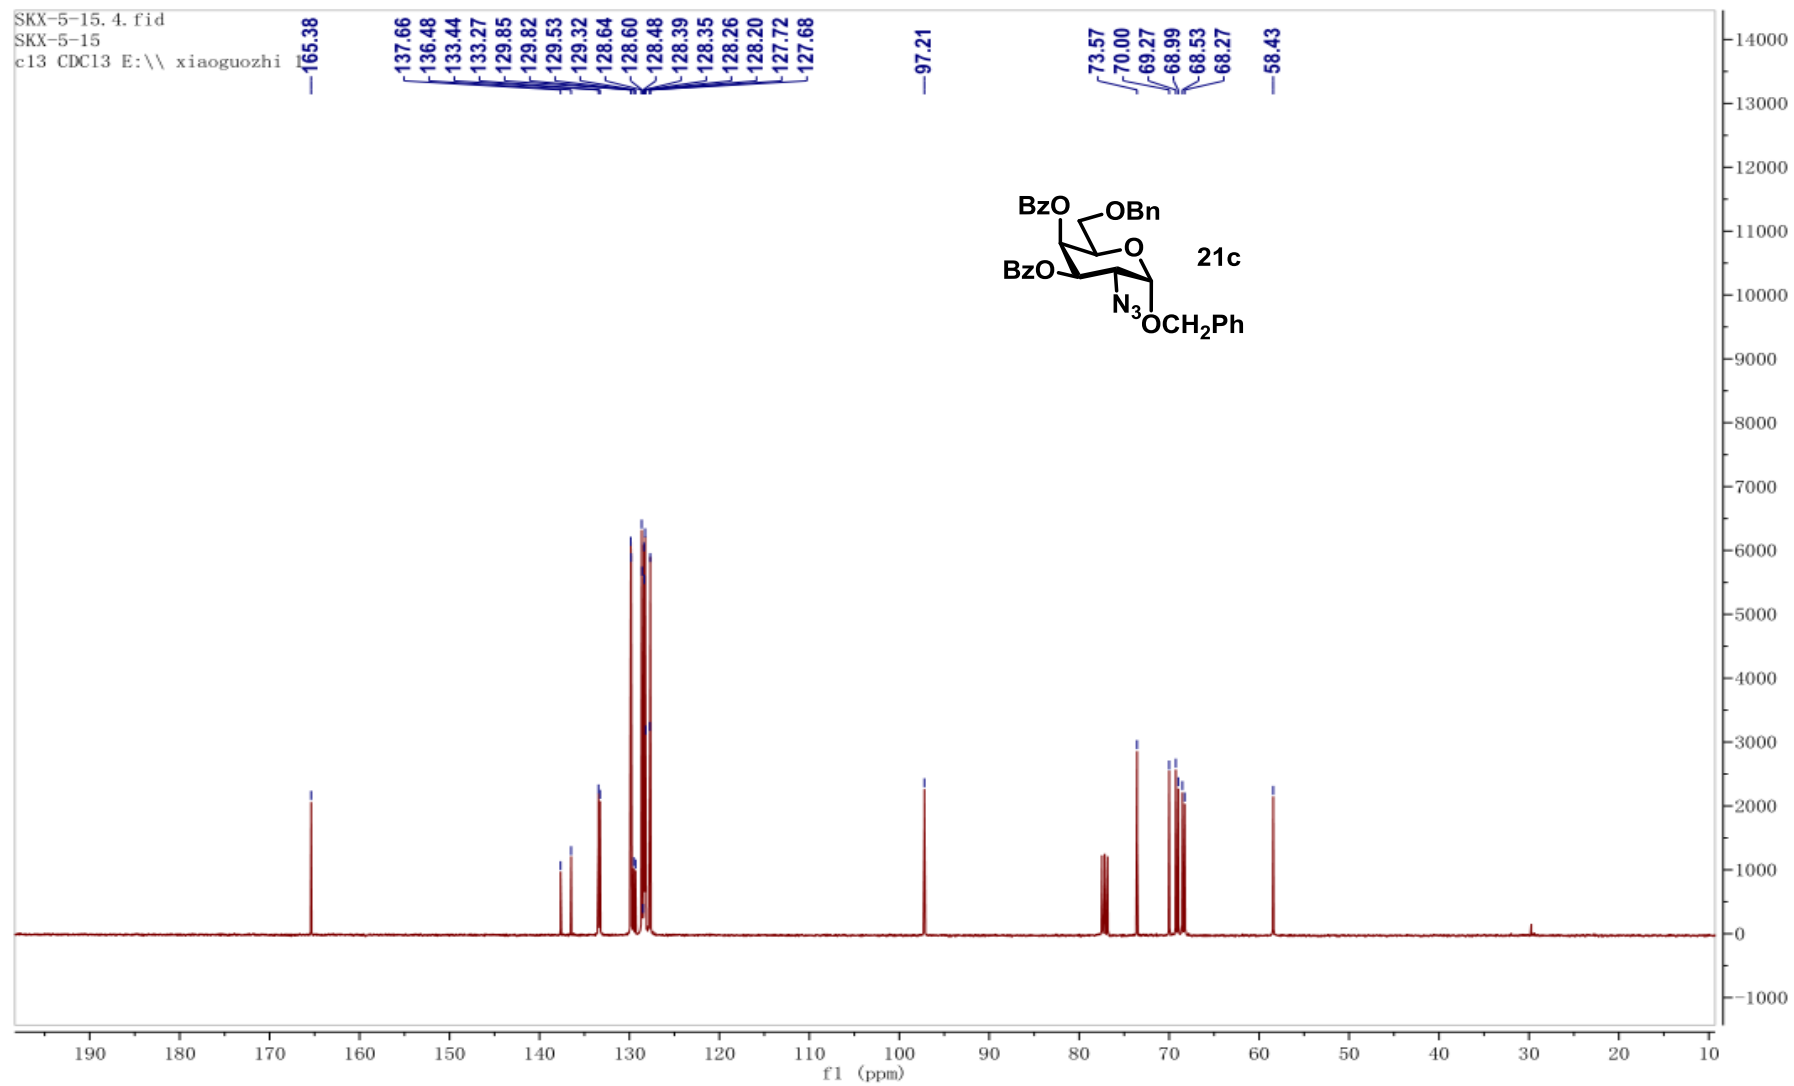

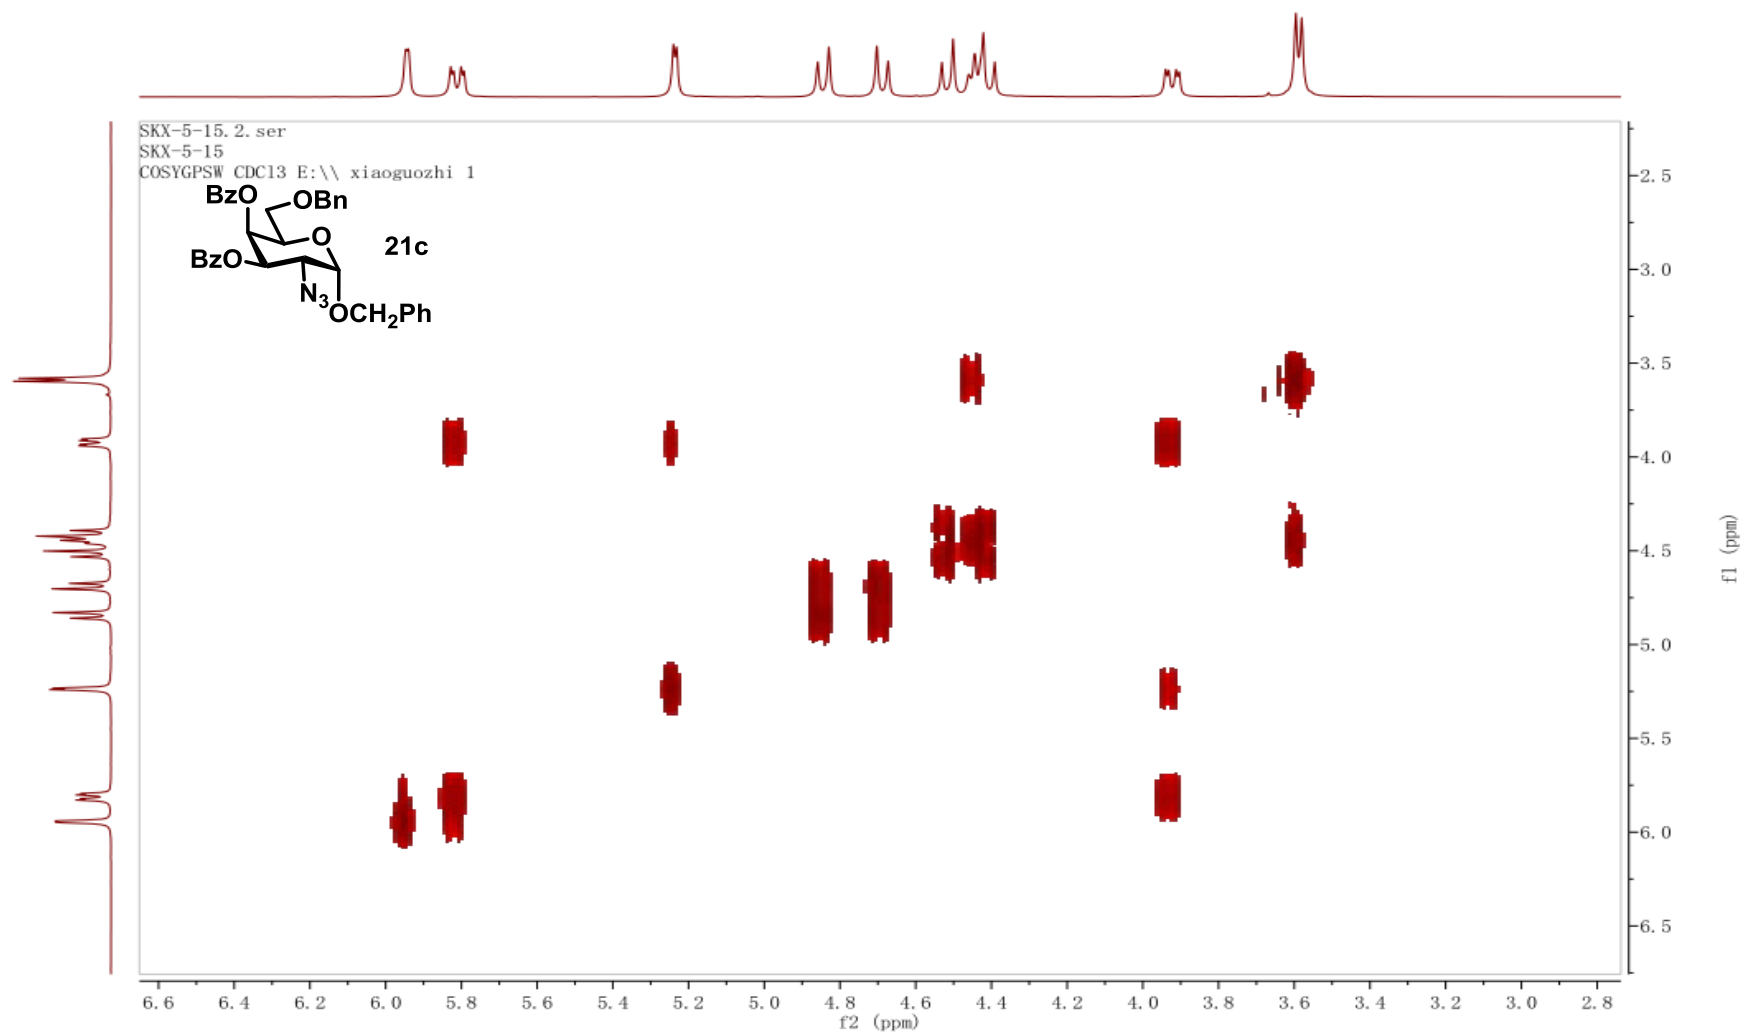



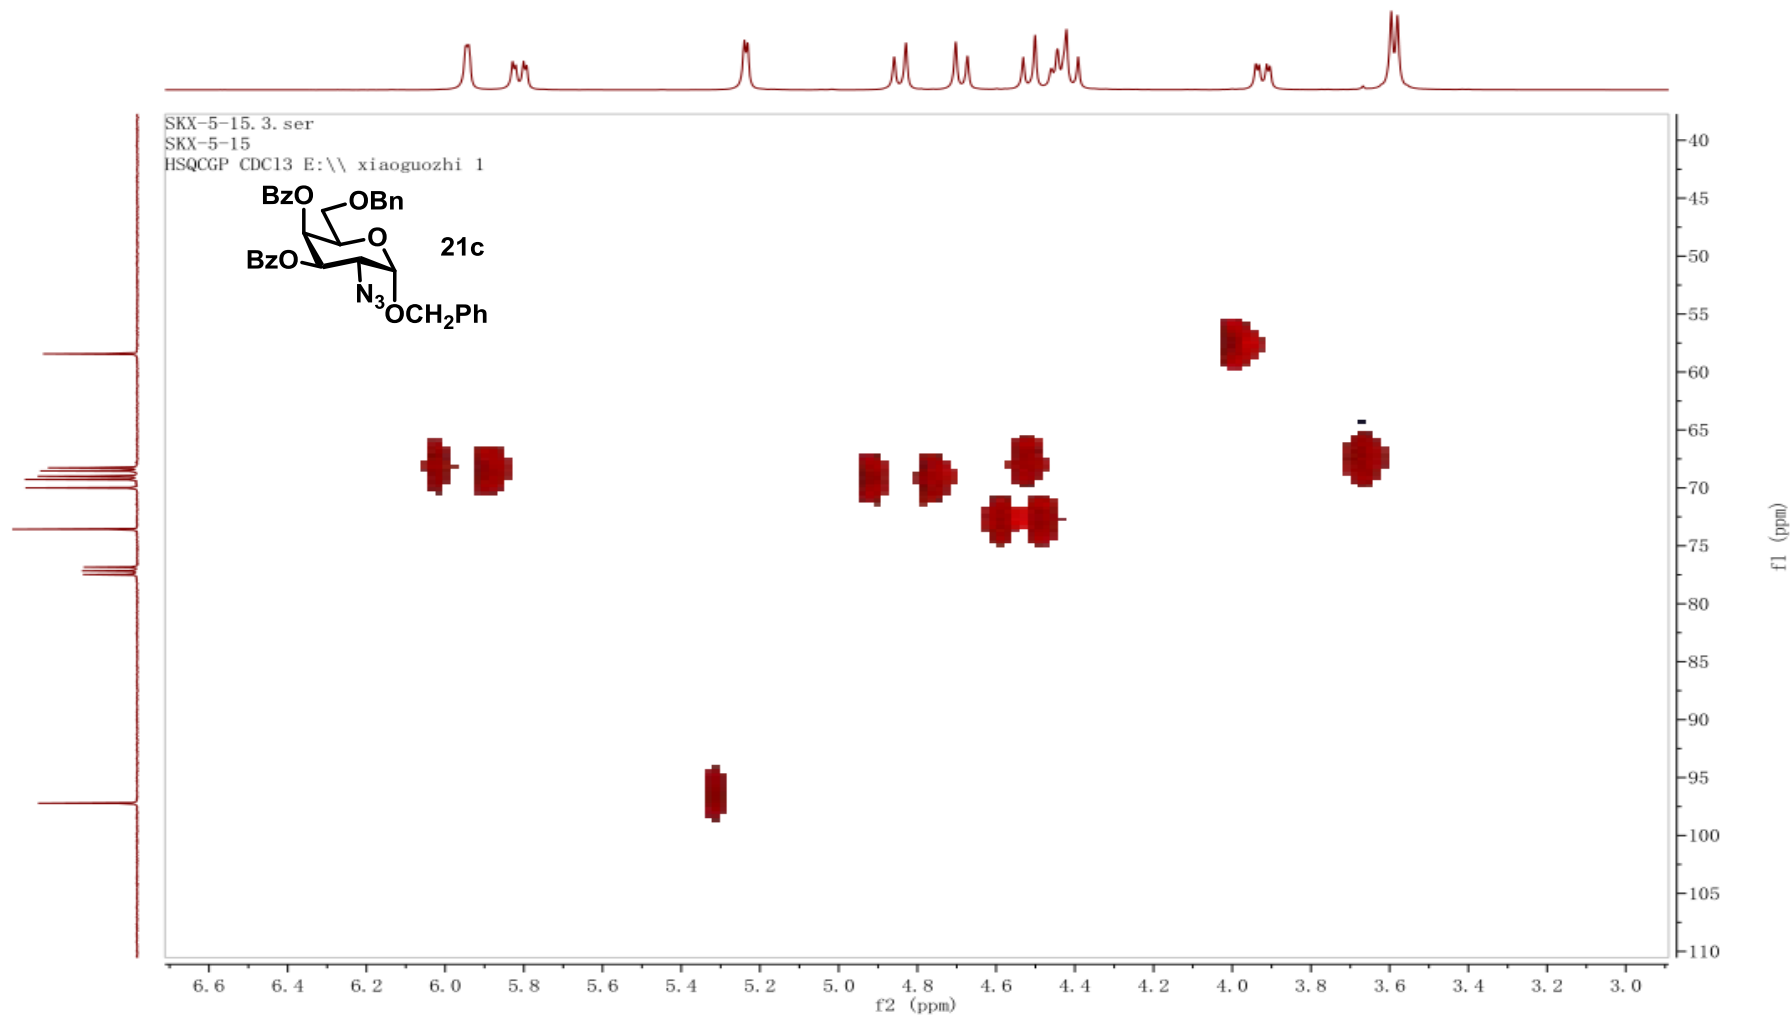

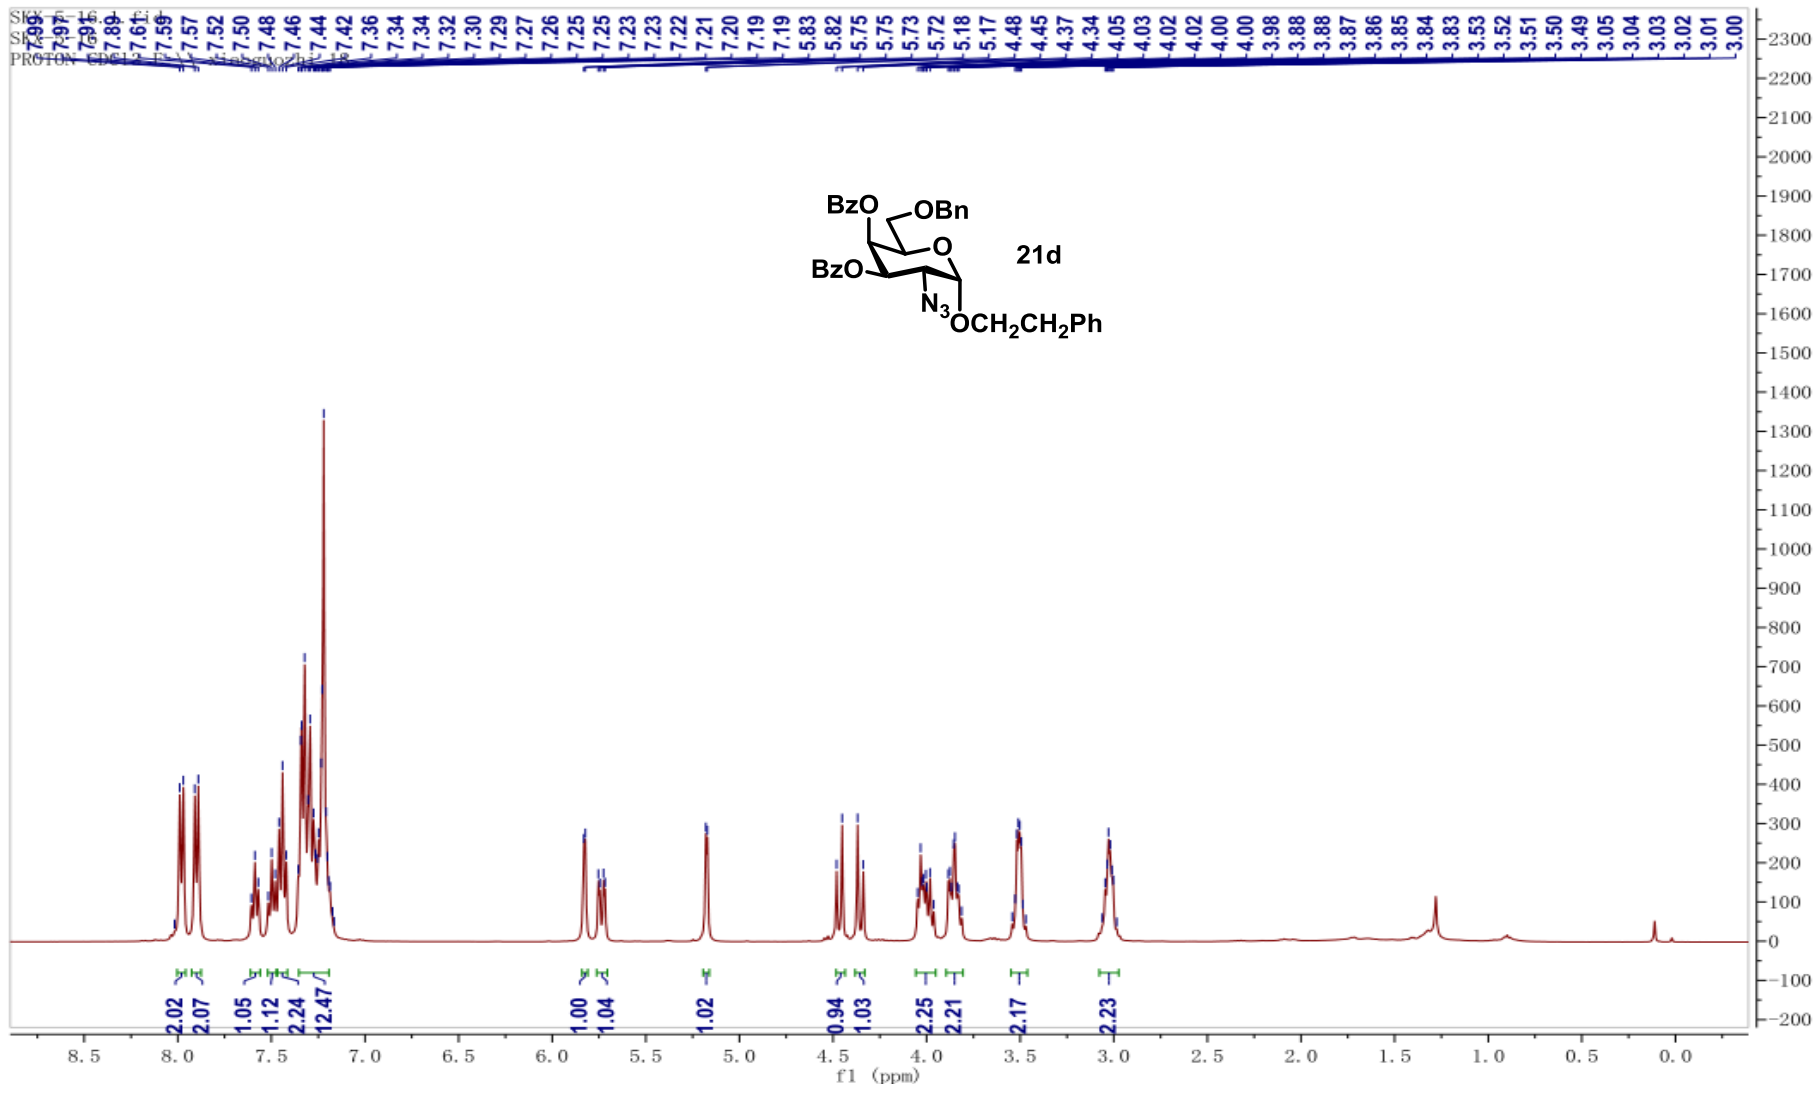

SKX-5-16.3.fid  
SKX-5-16  
c13 CDC13 E:\ xiaog... i 18

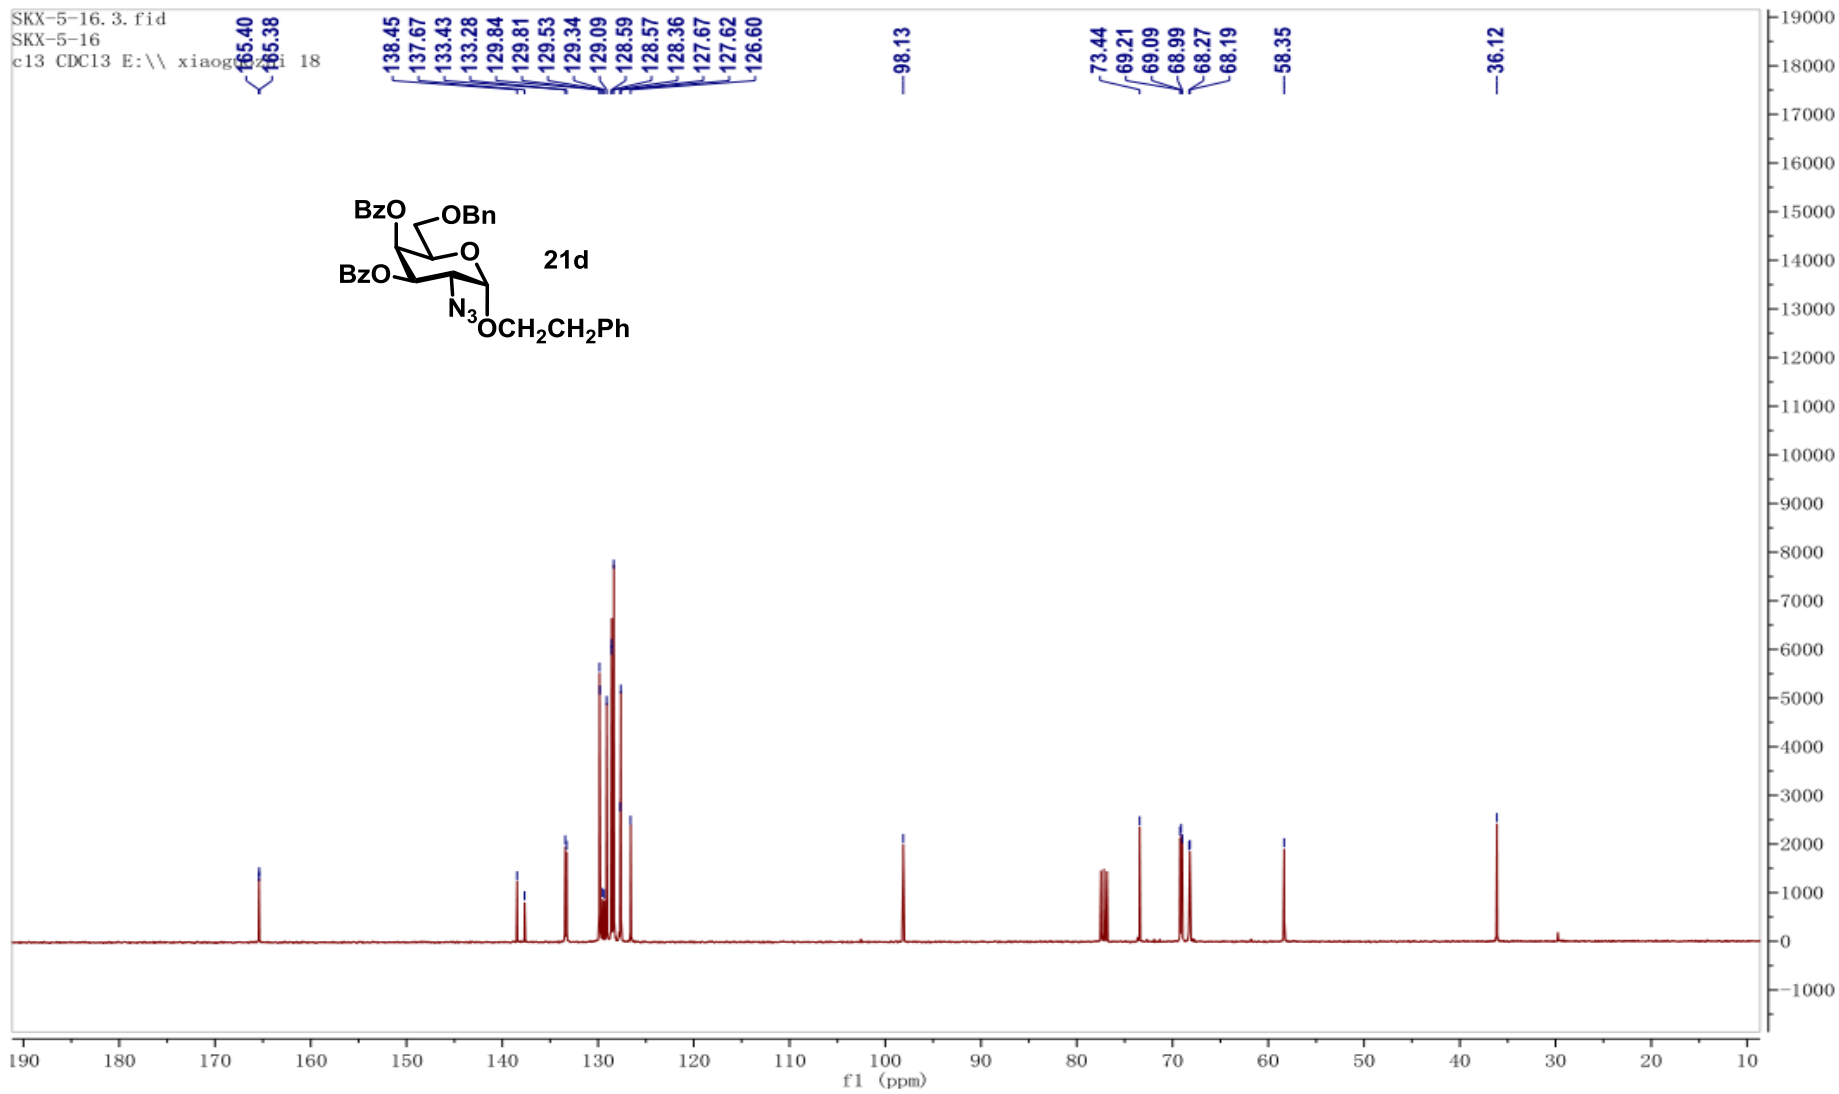

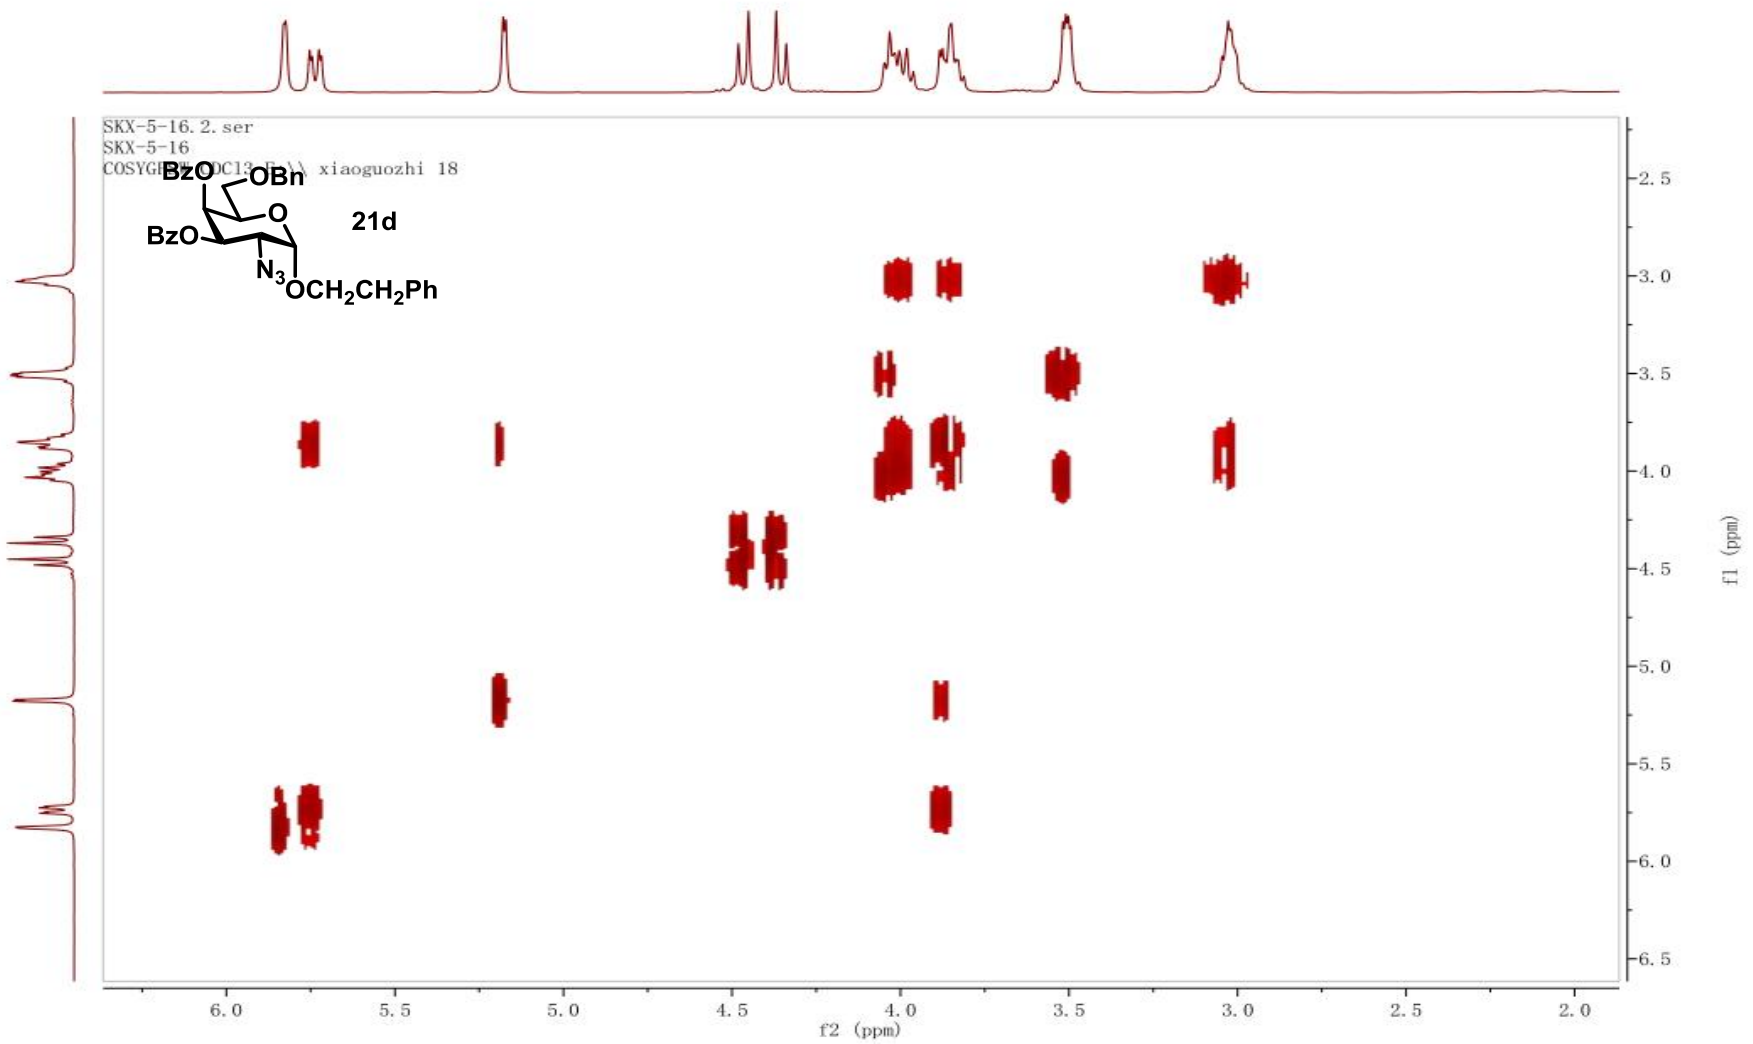

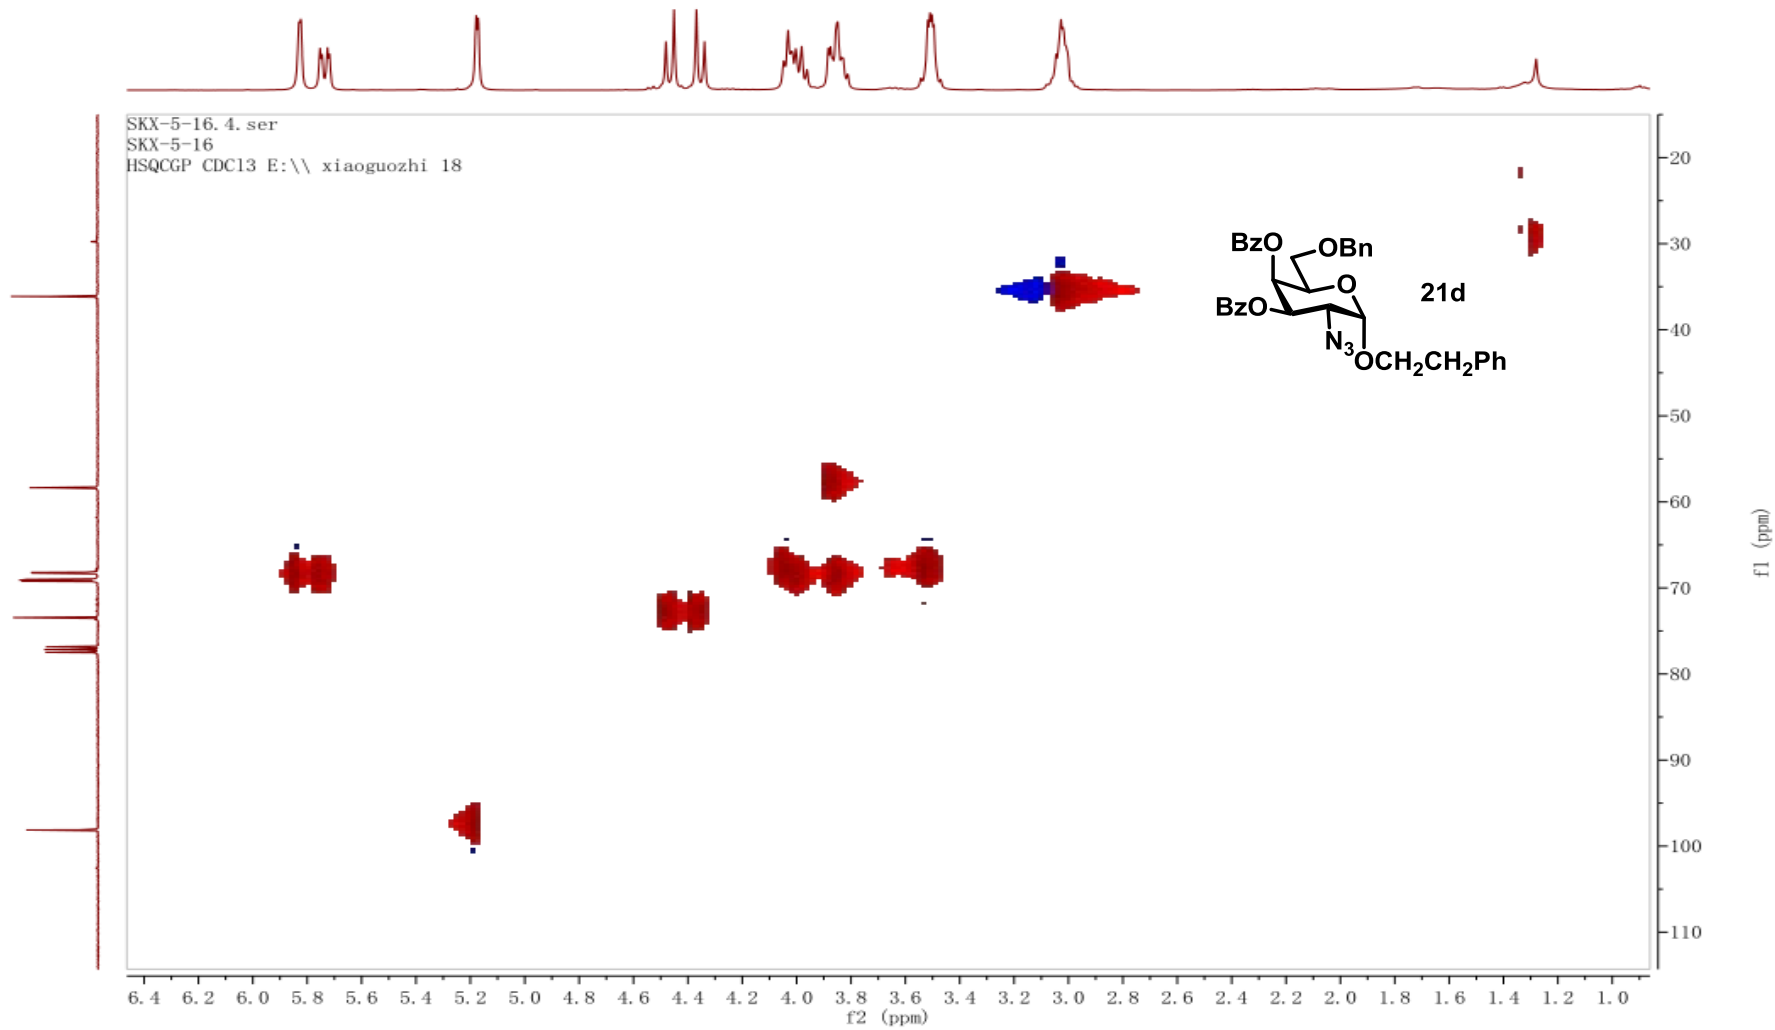

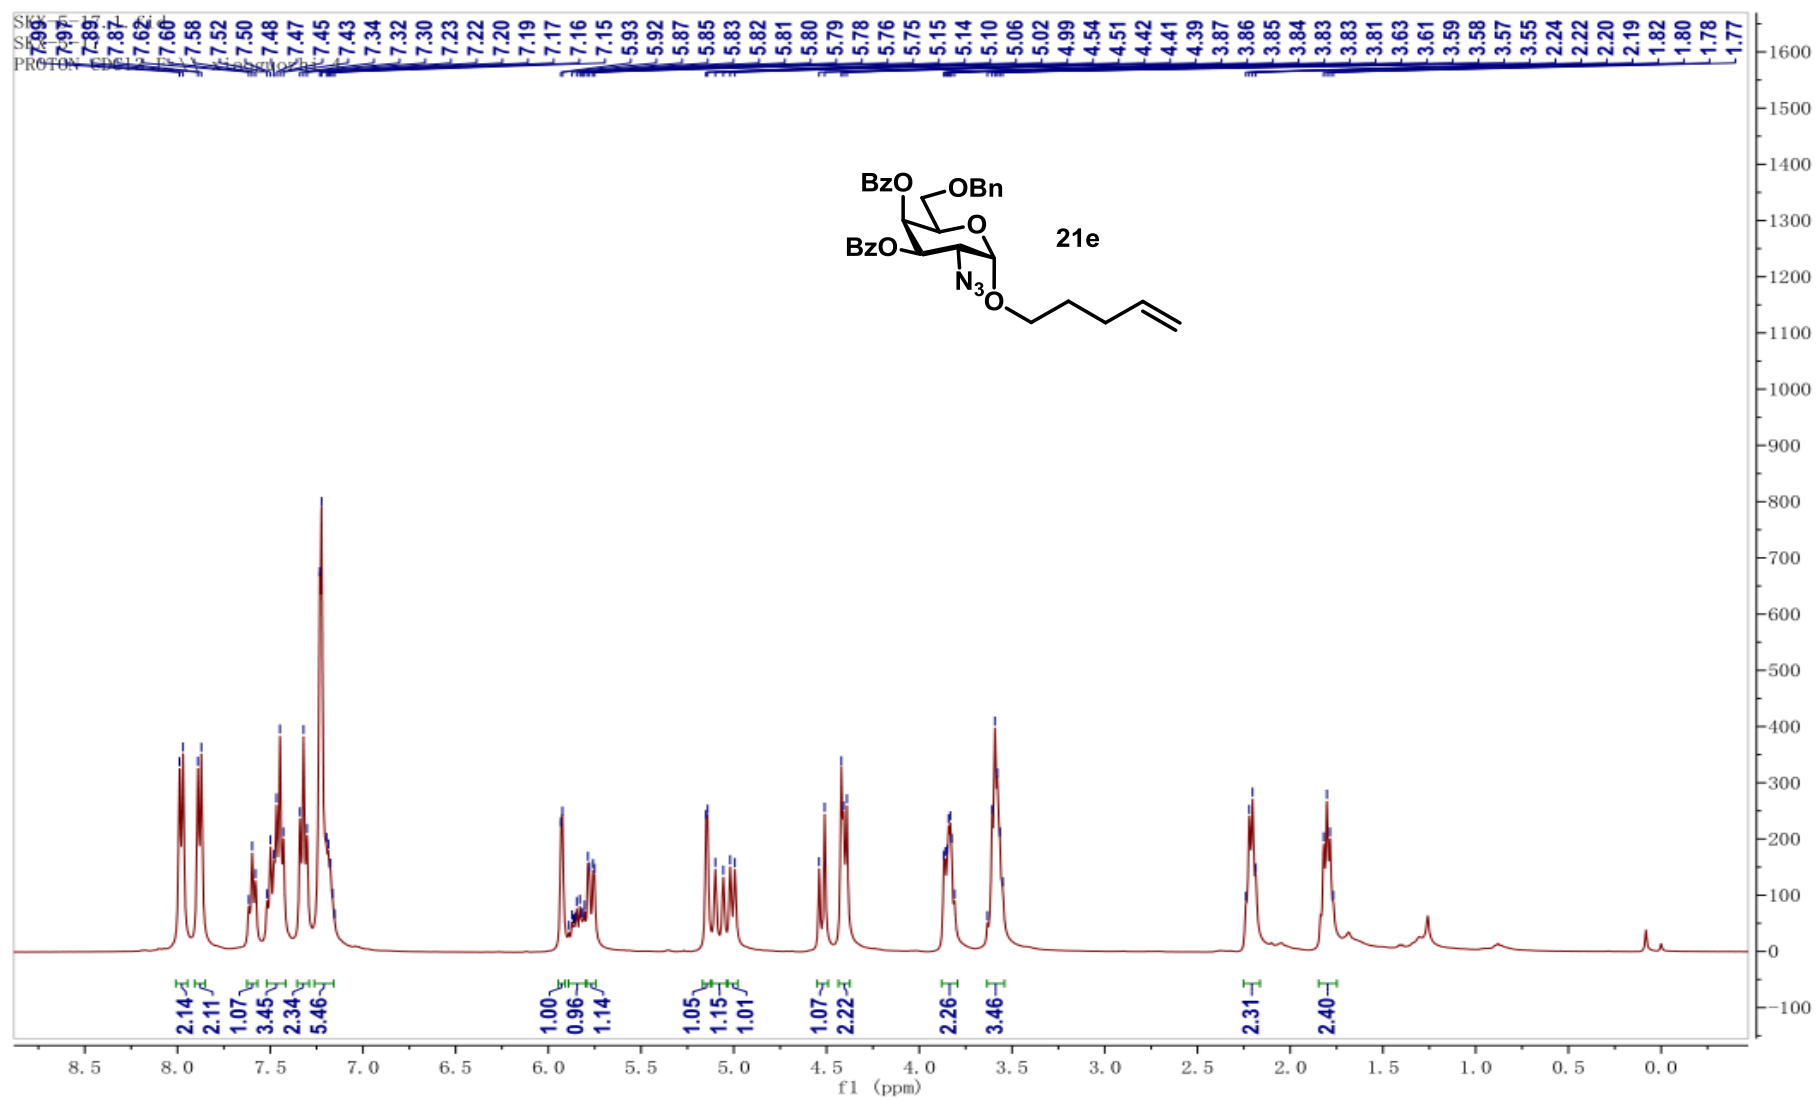

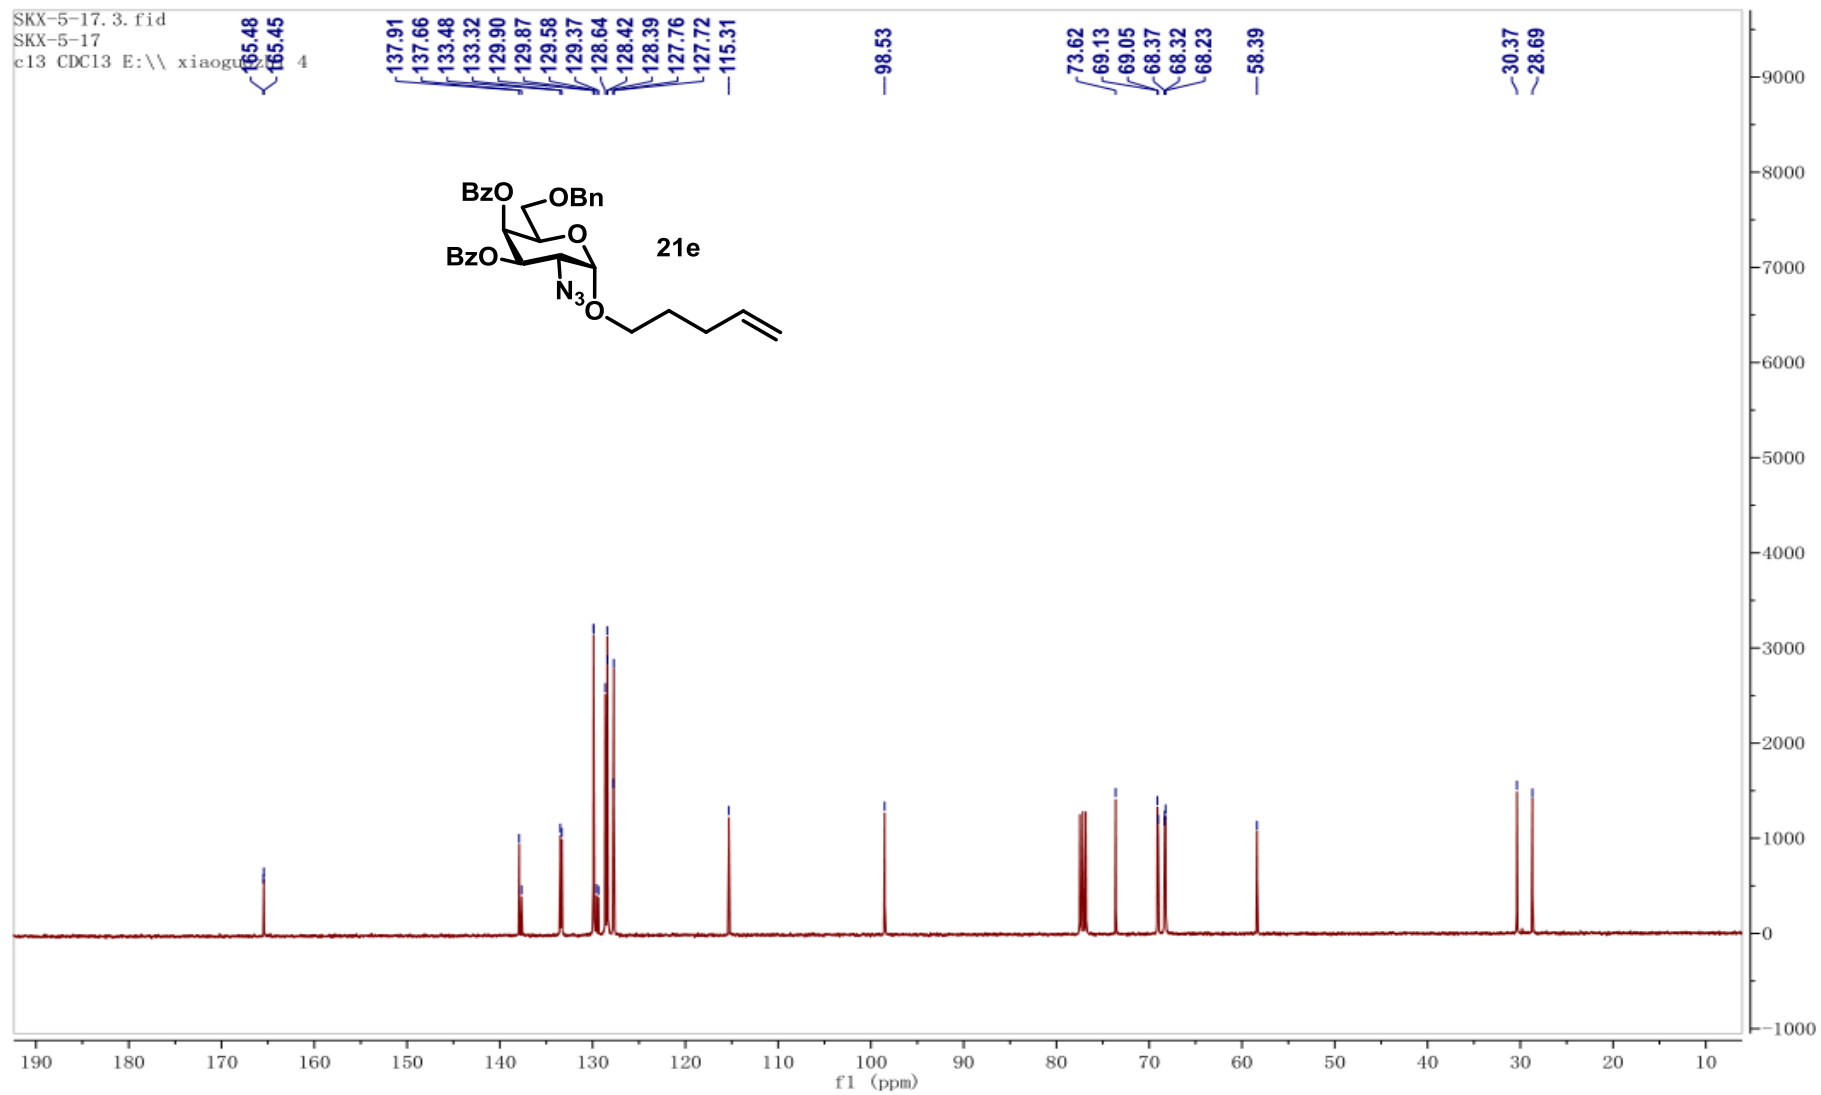

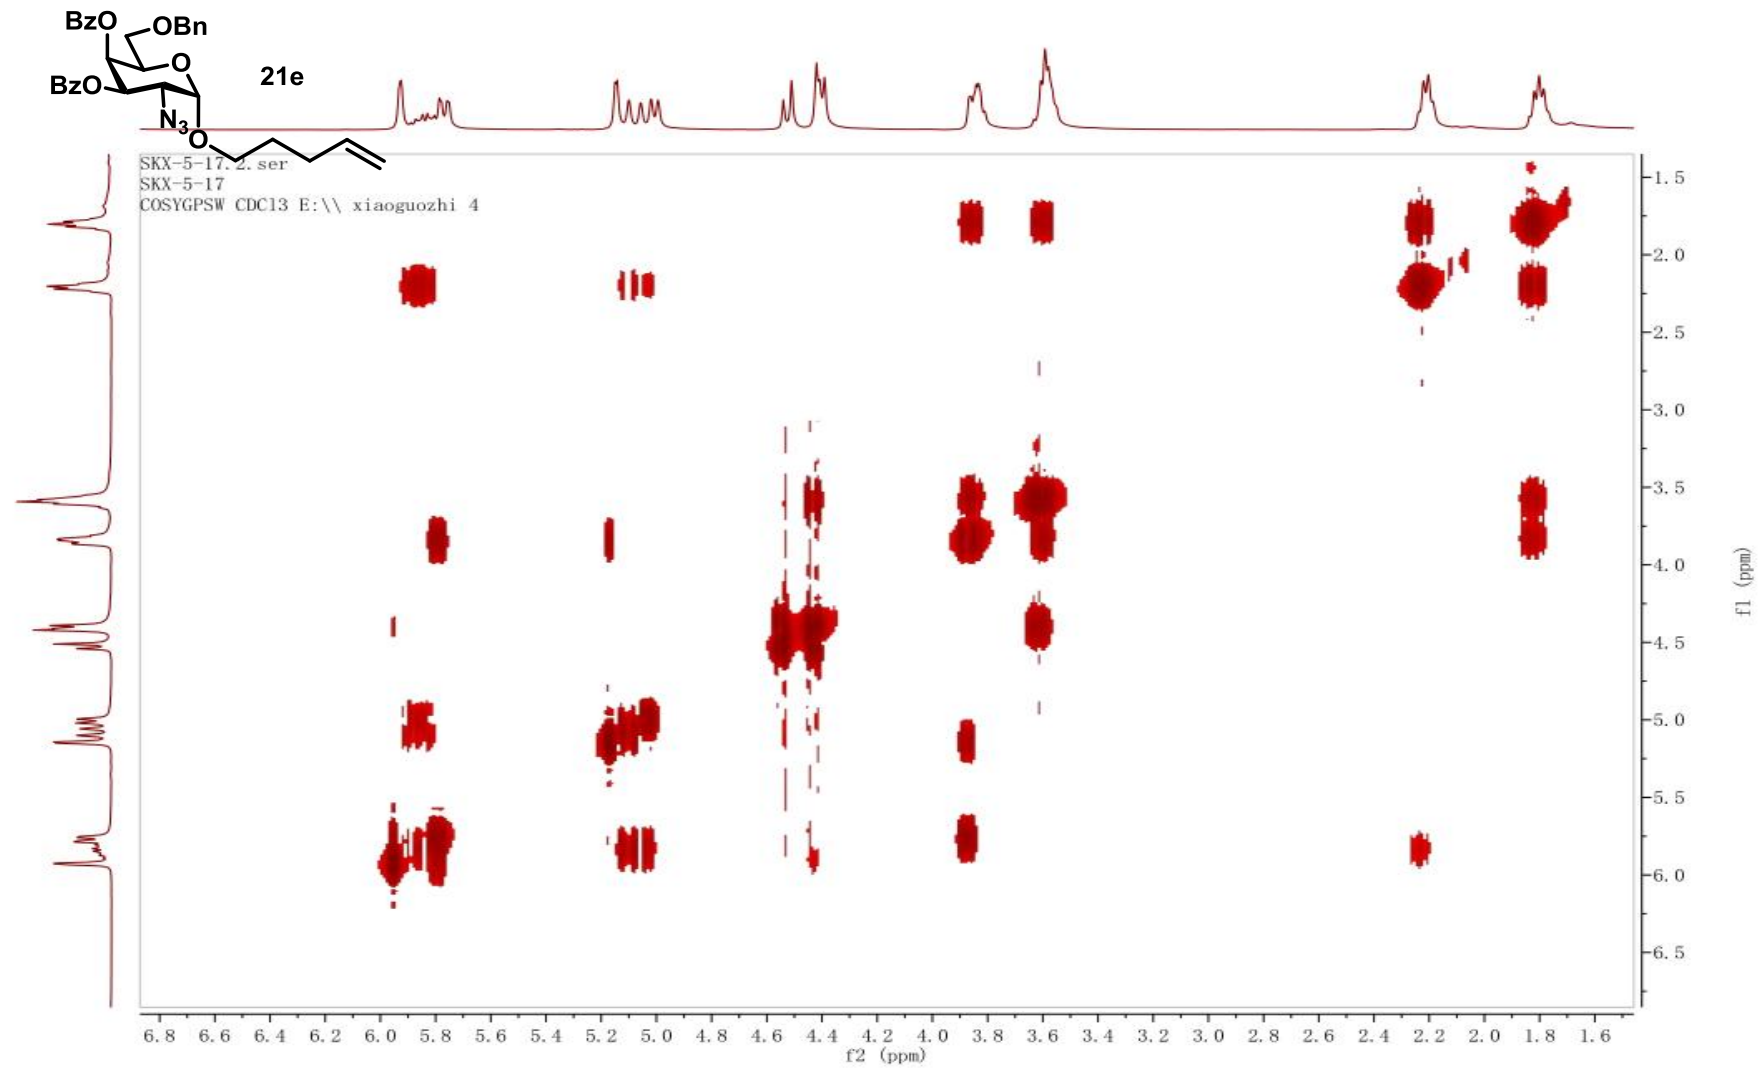



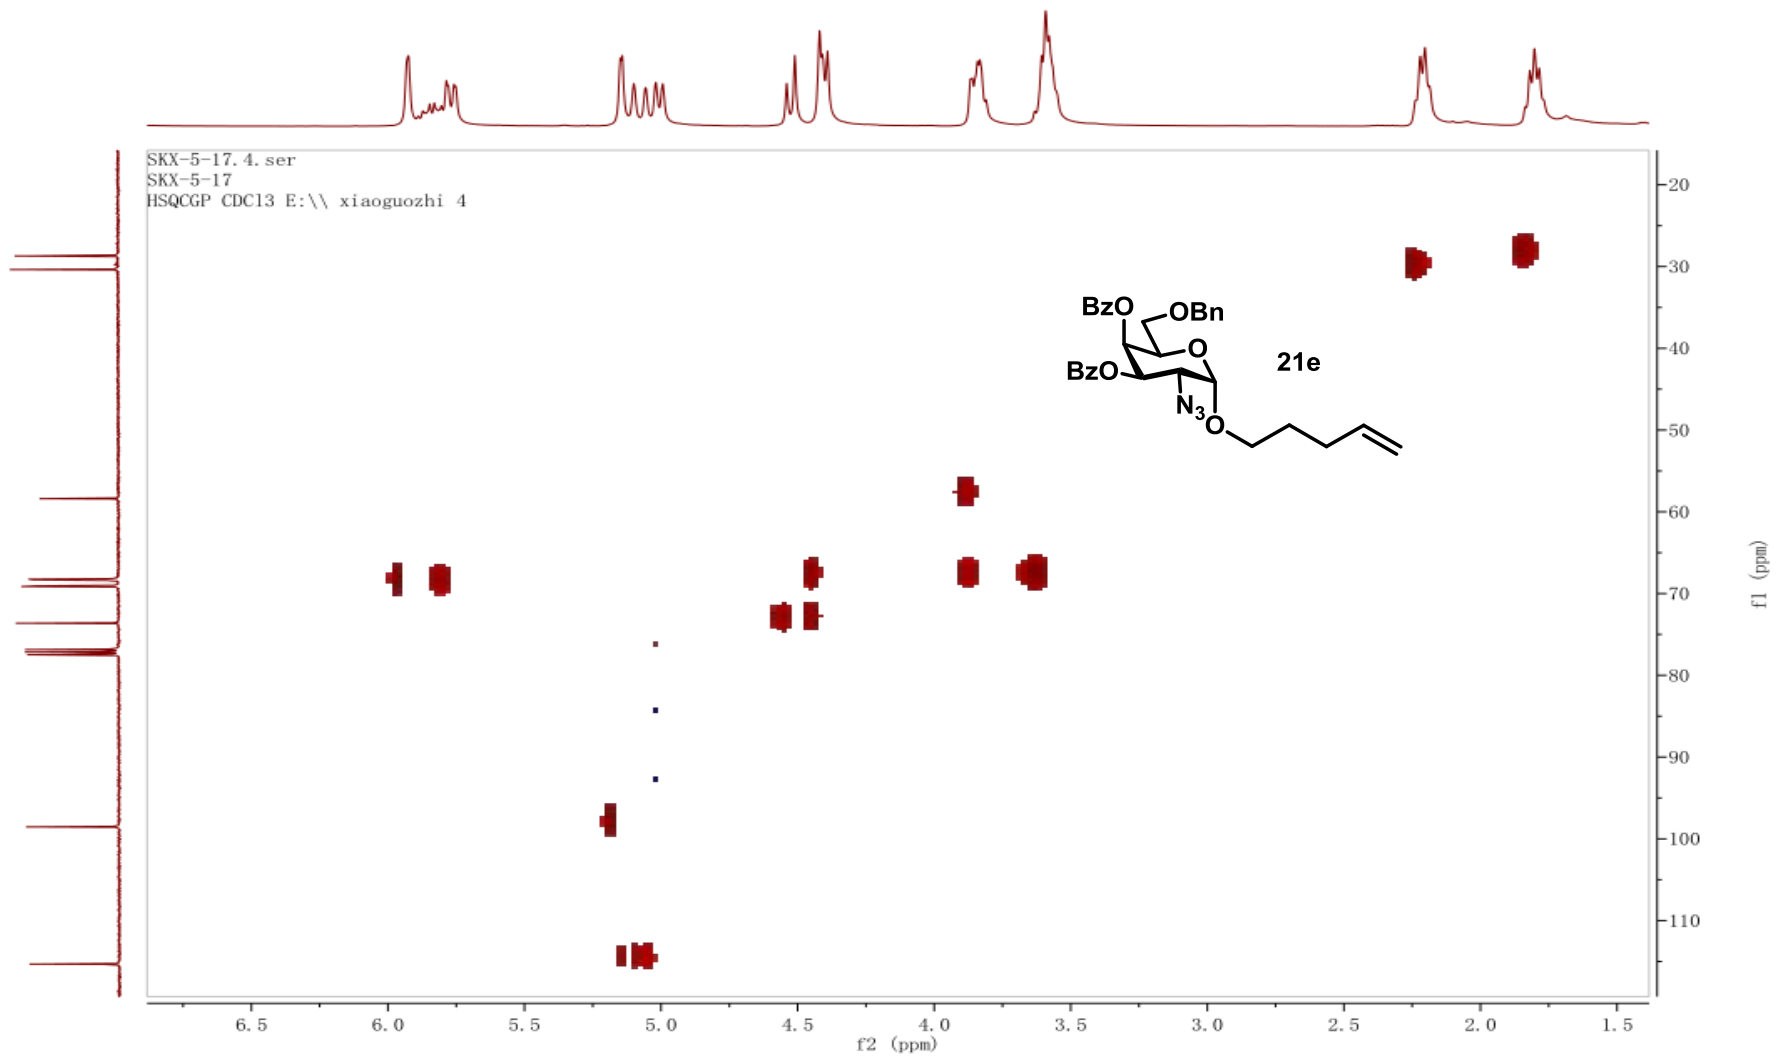

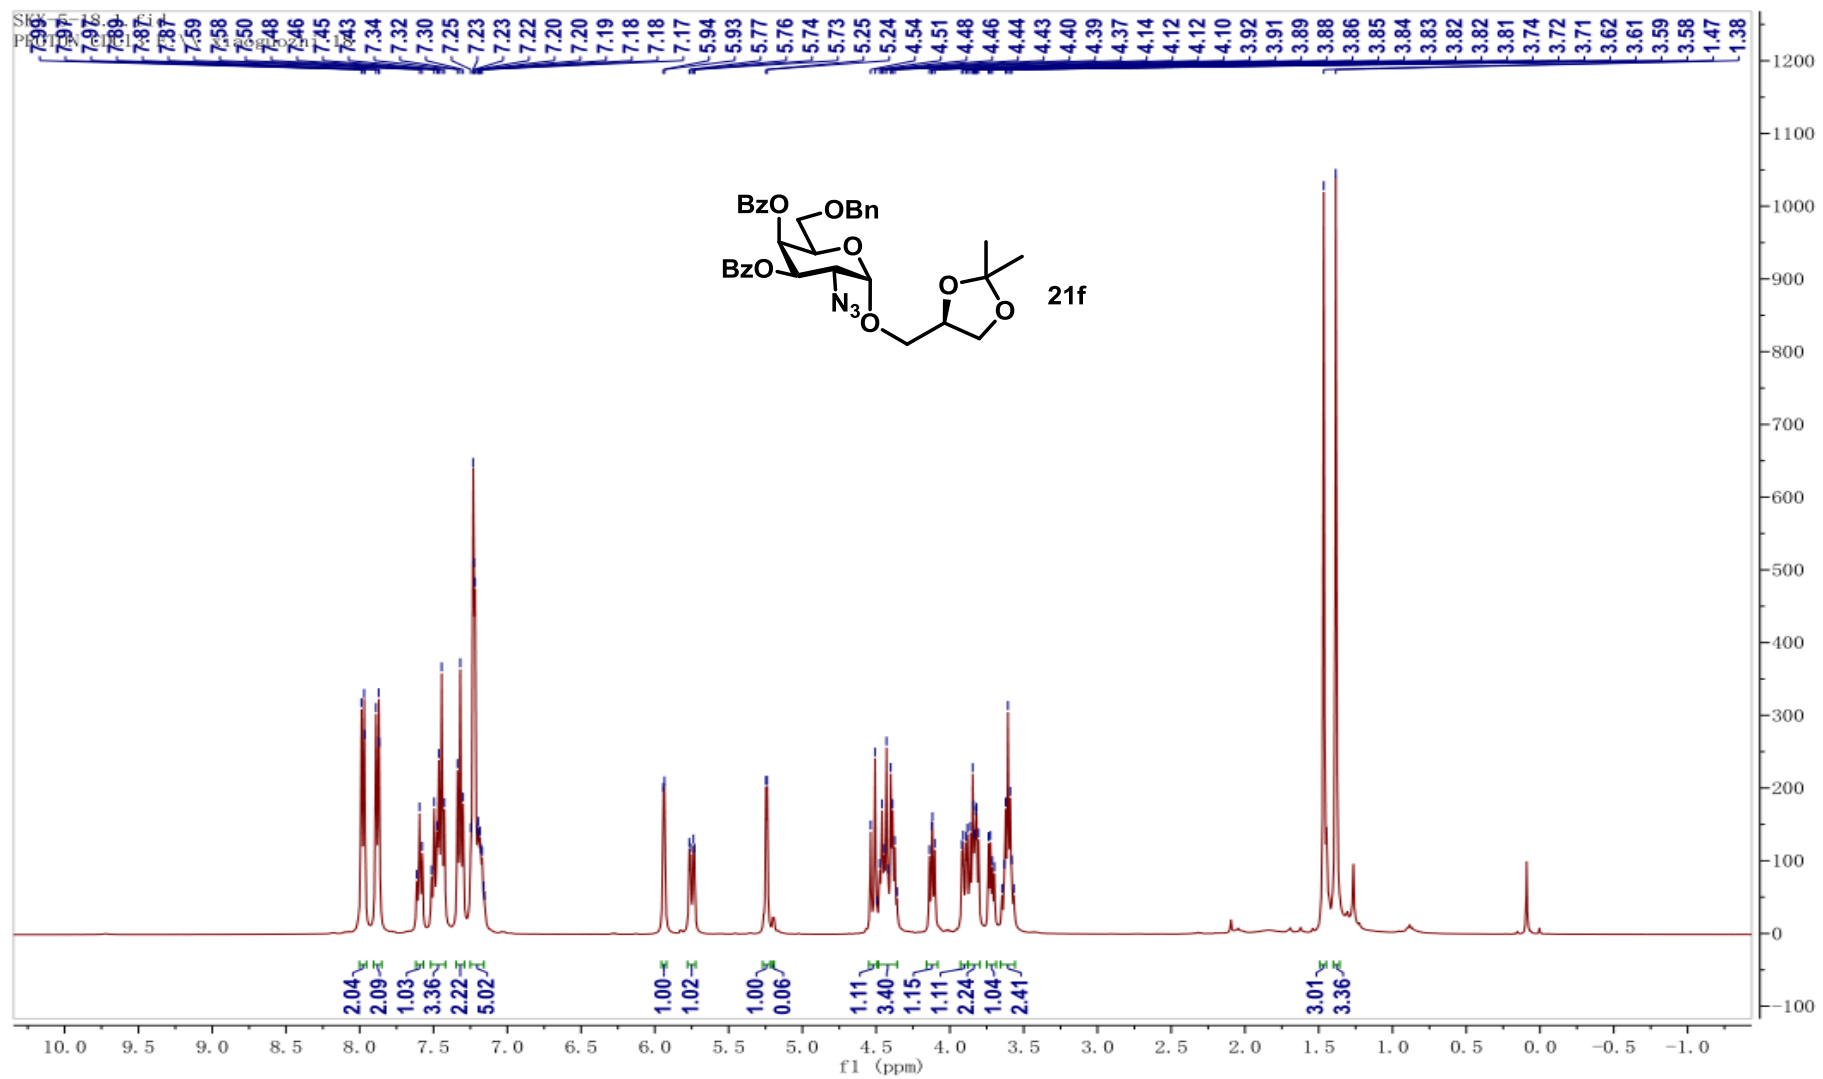

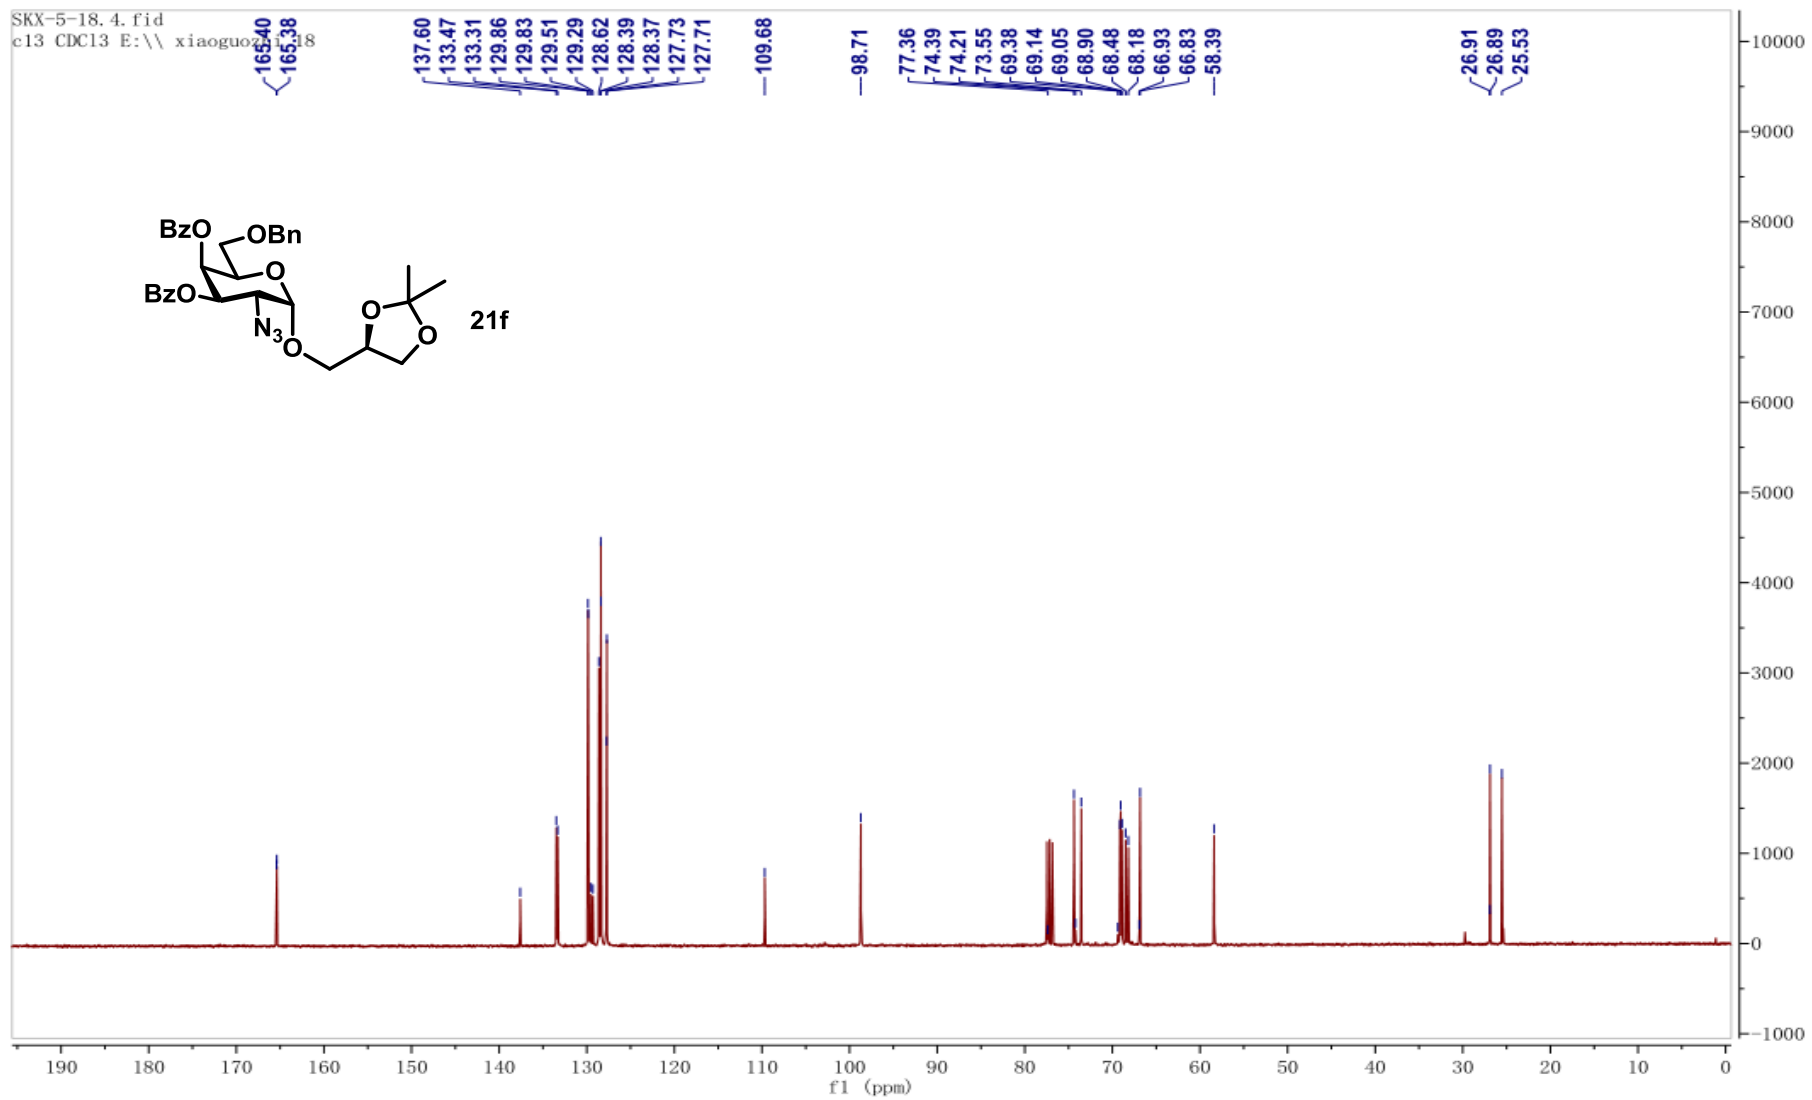

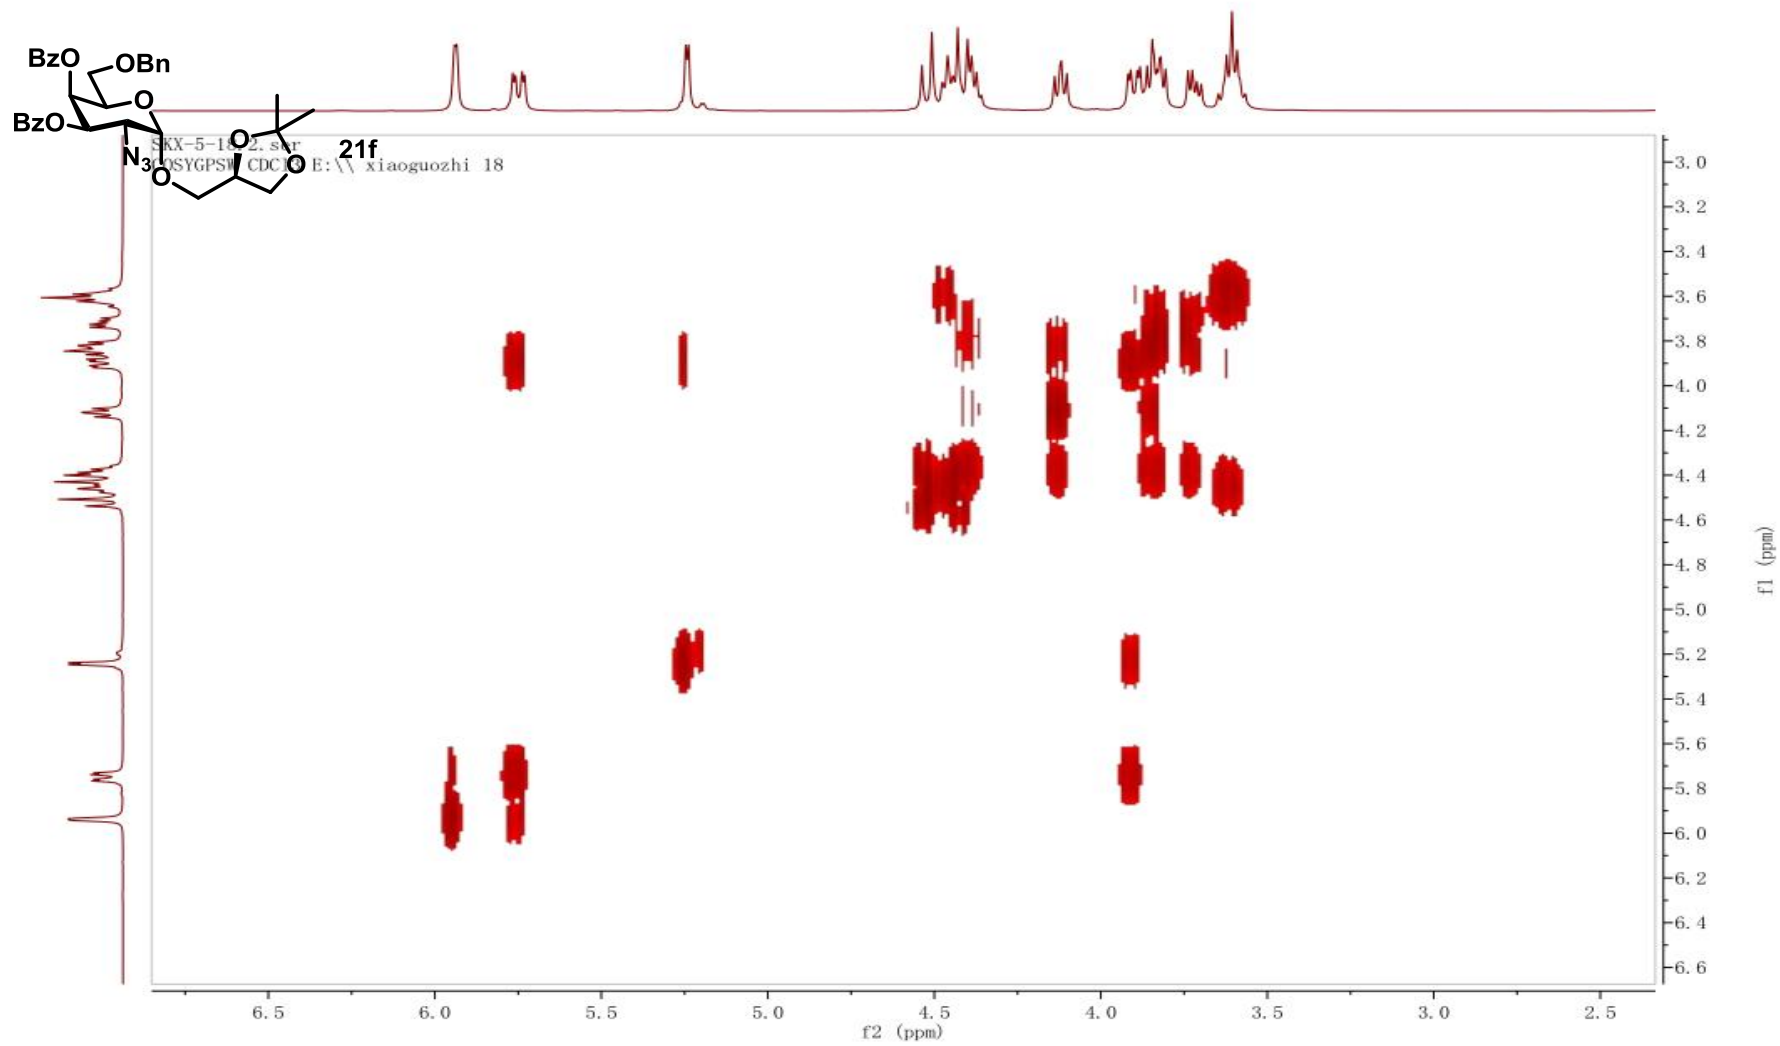

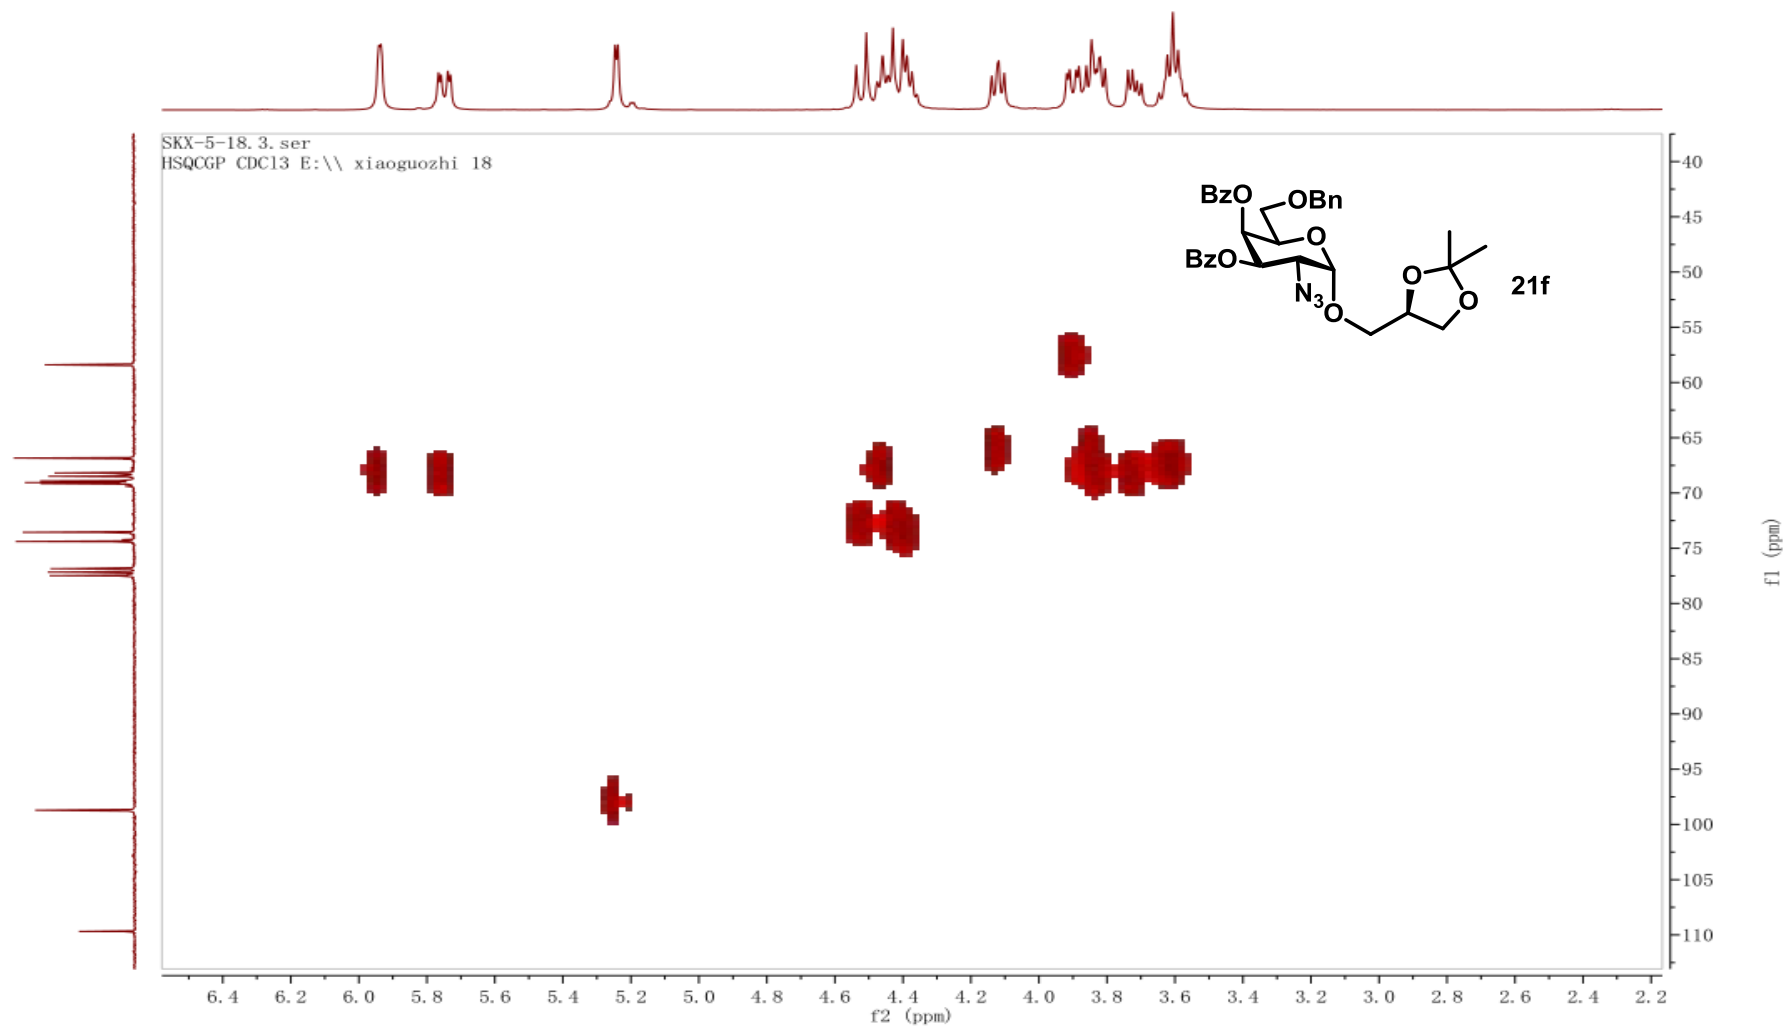

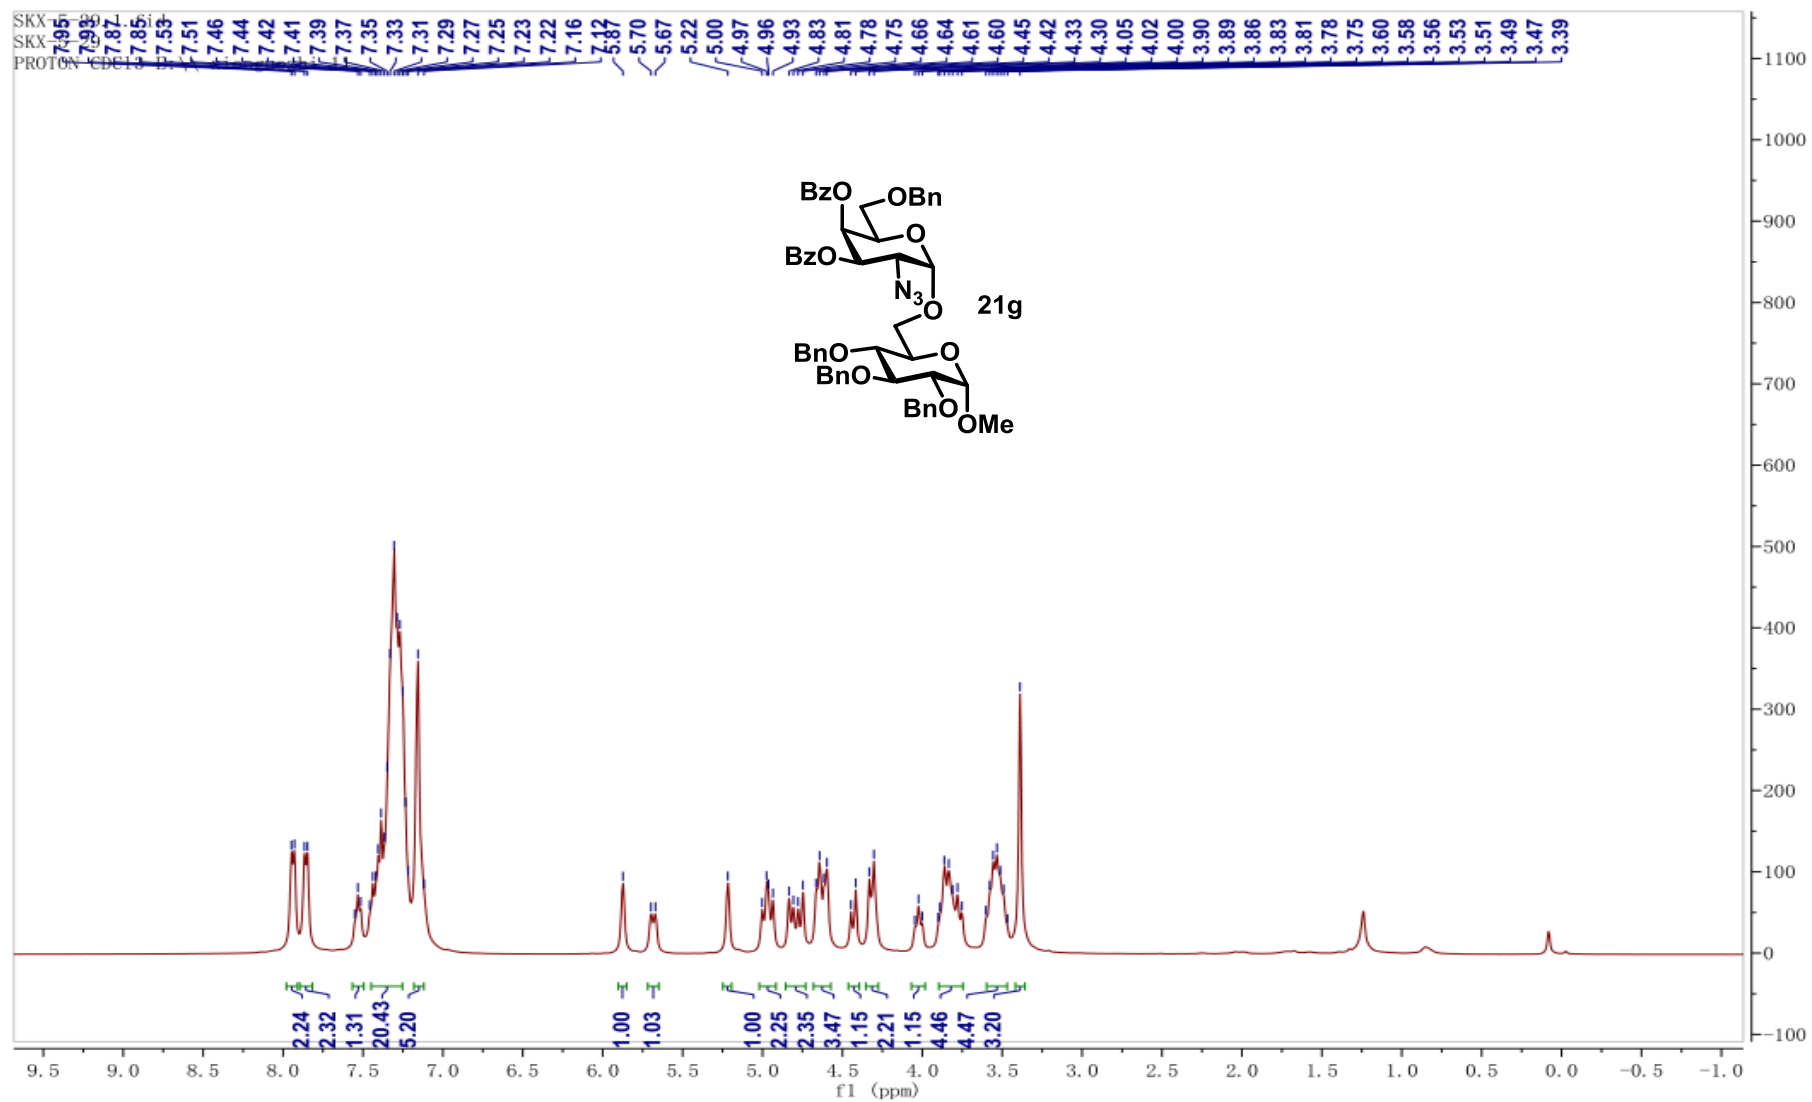

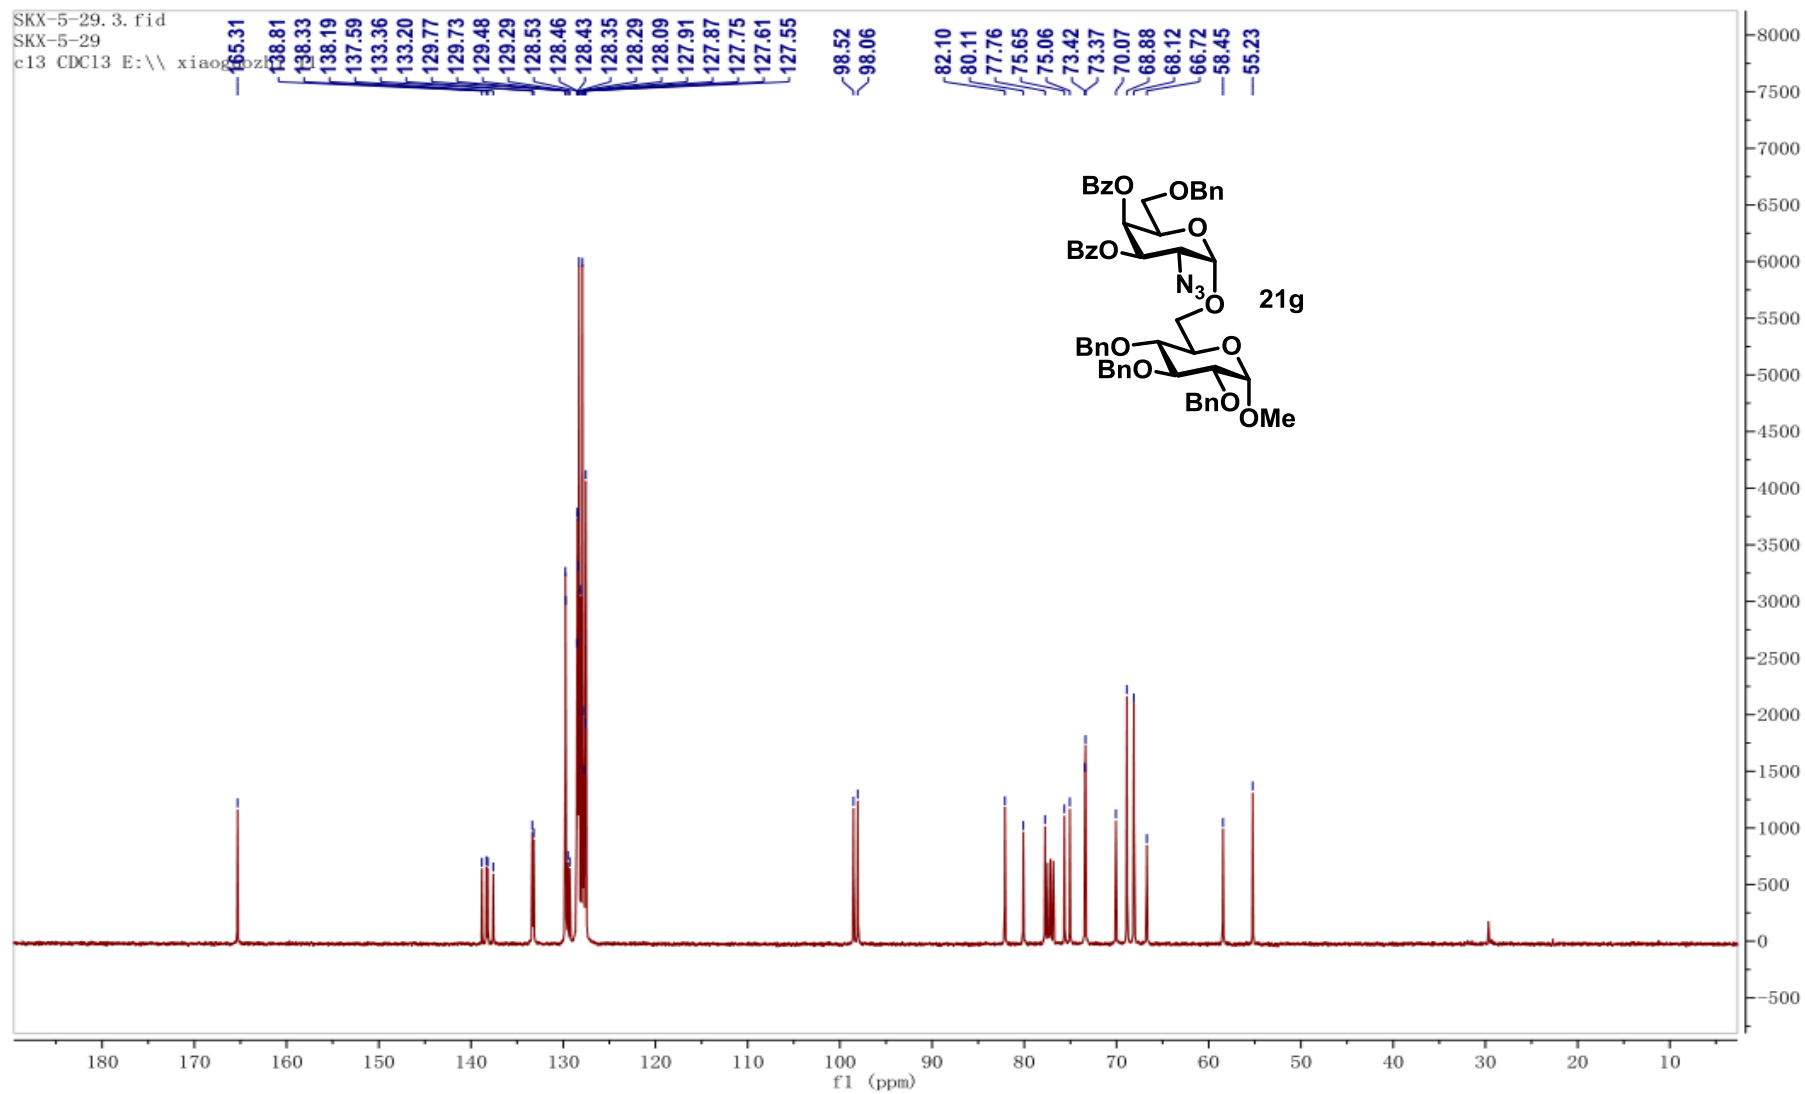

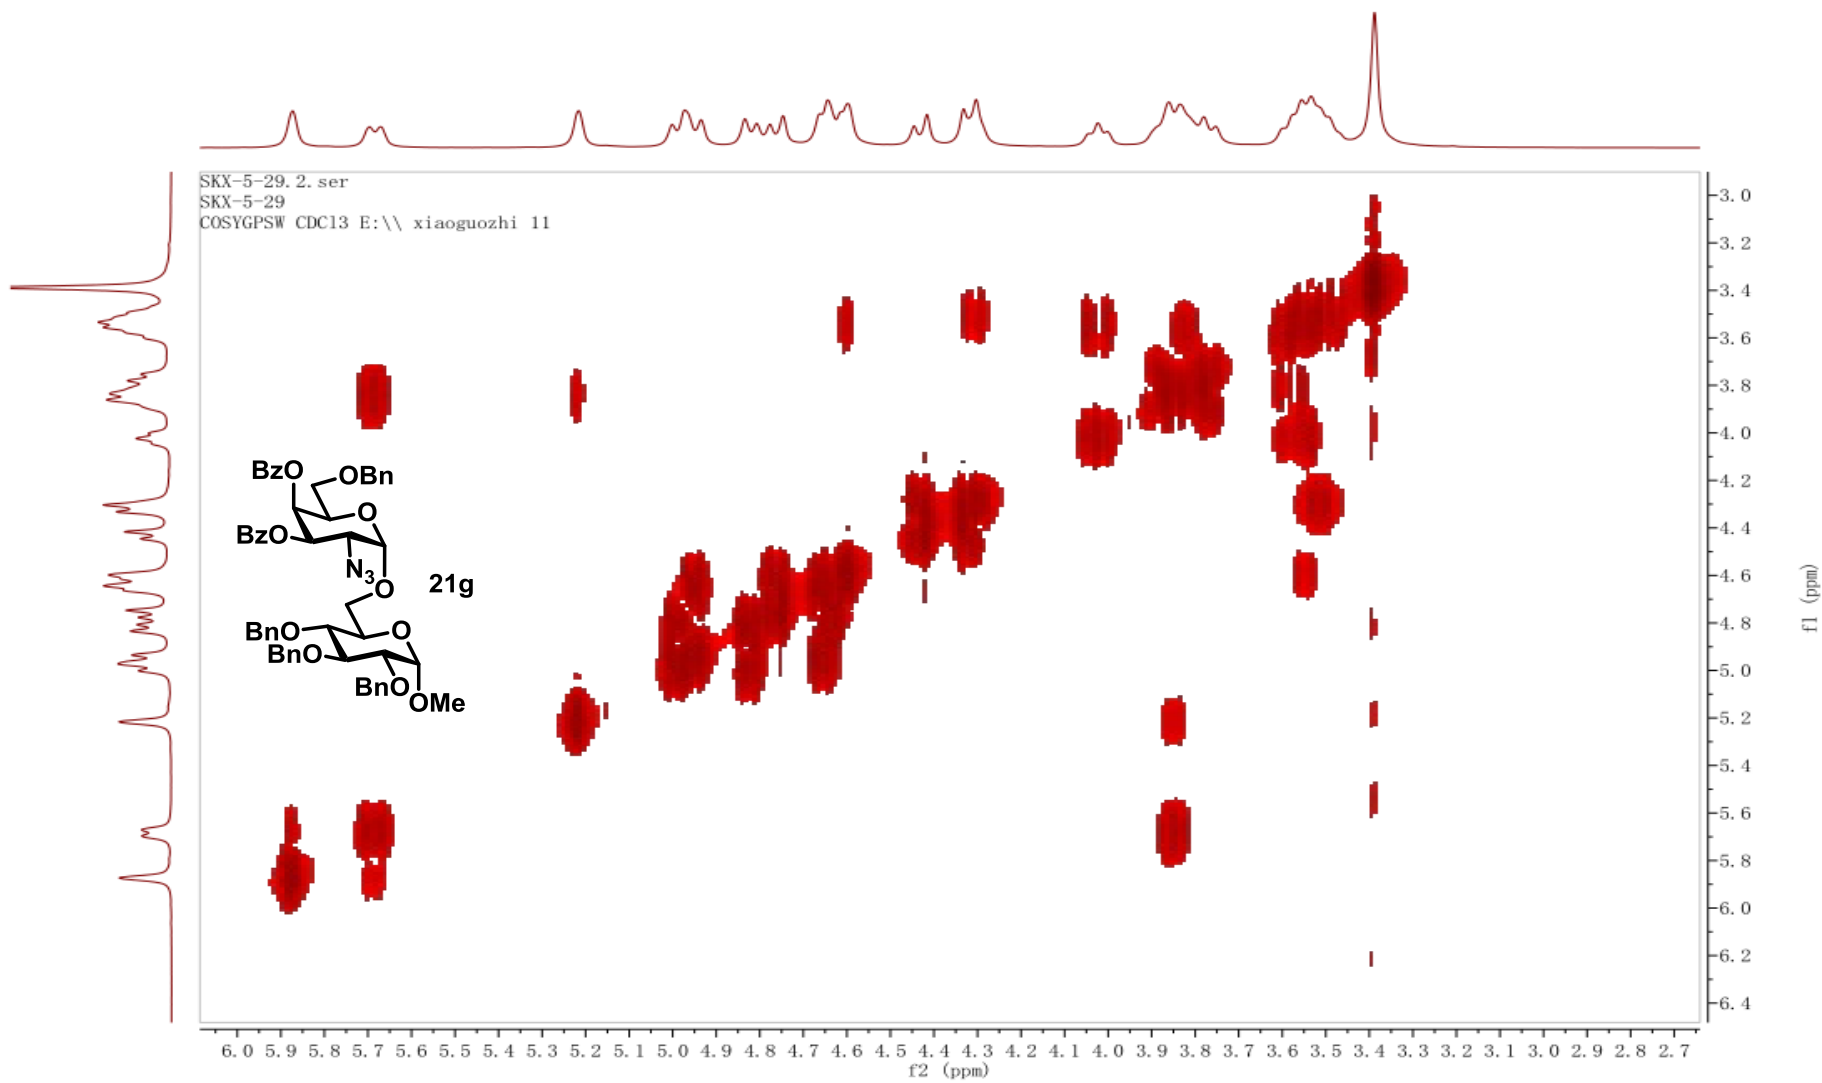



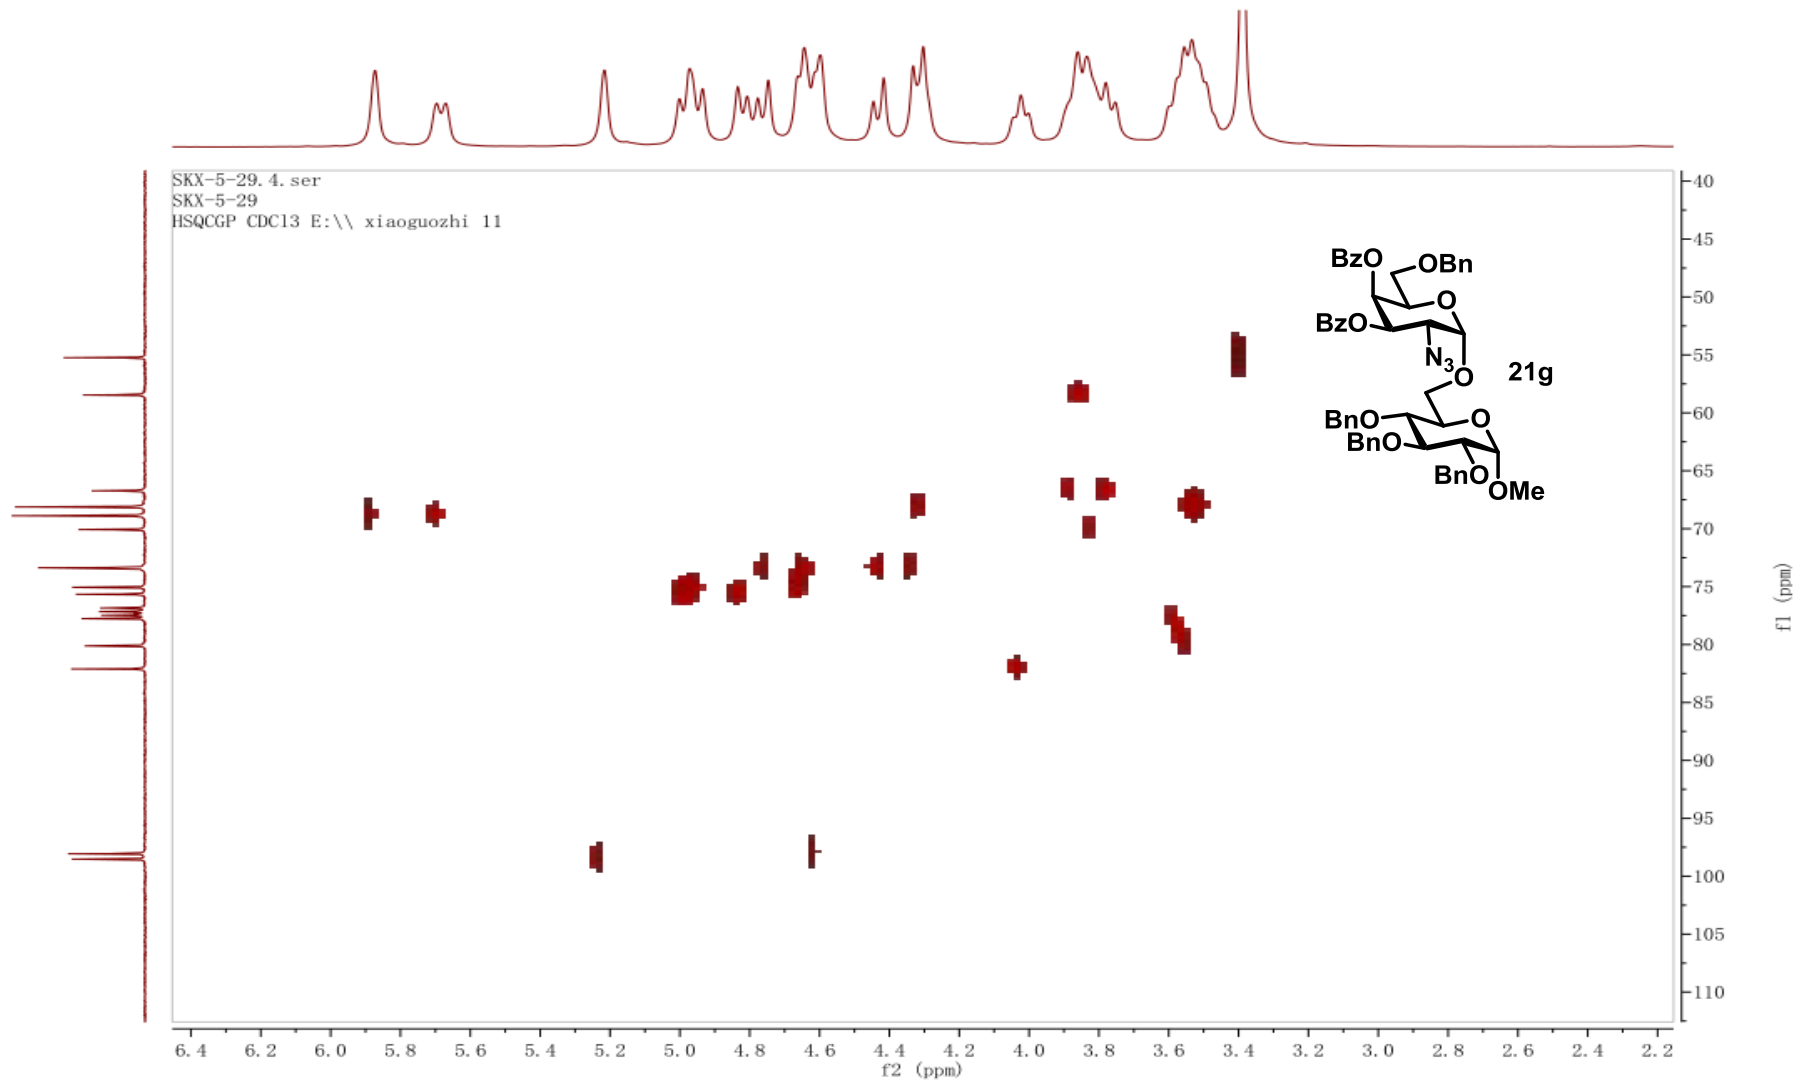

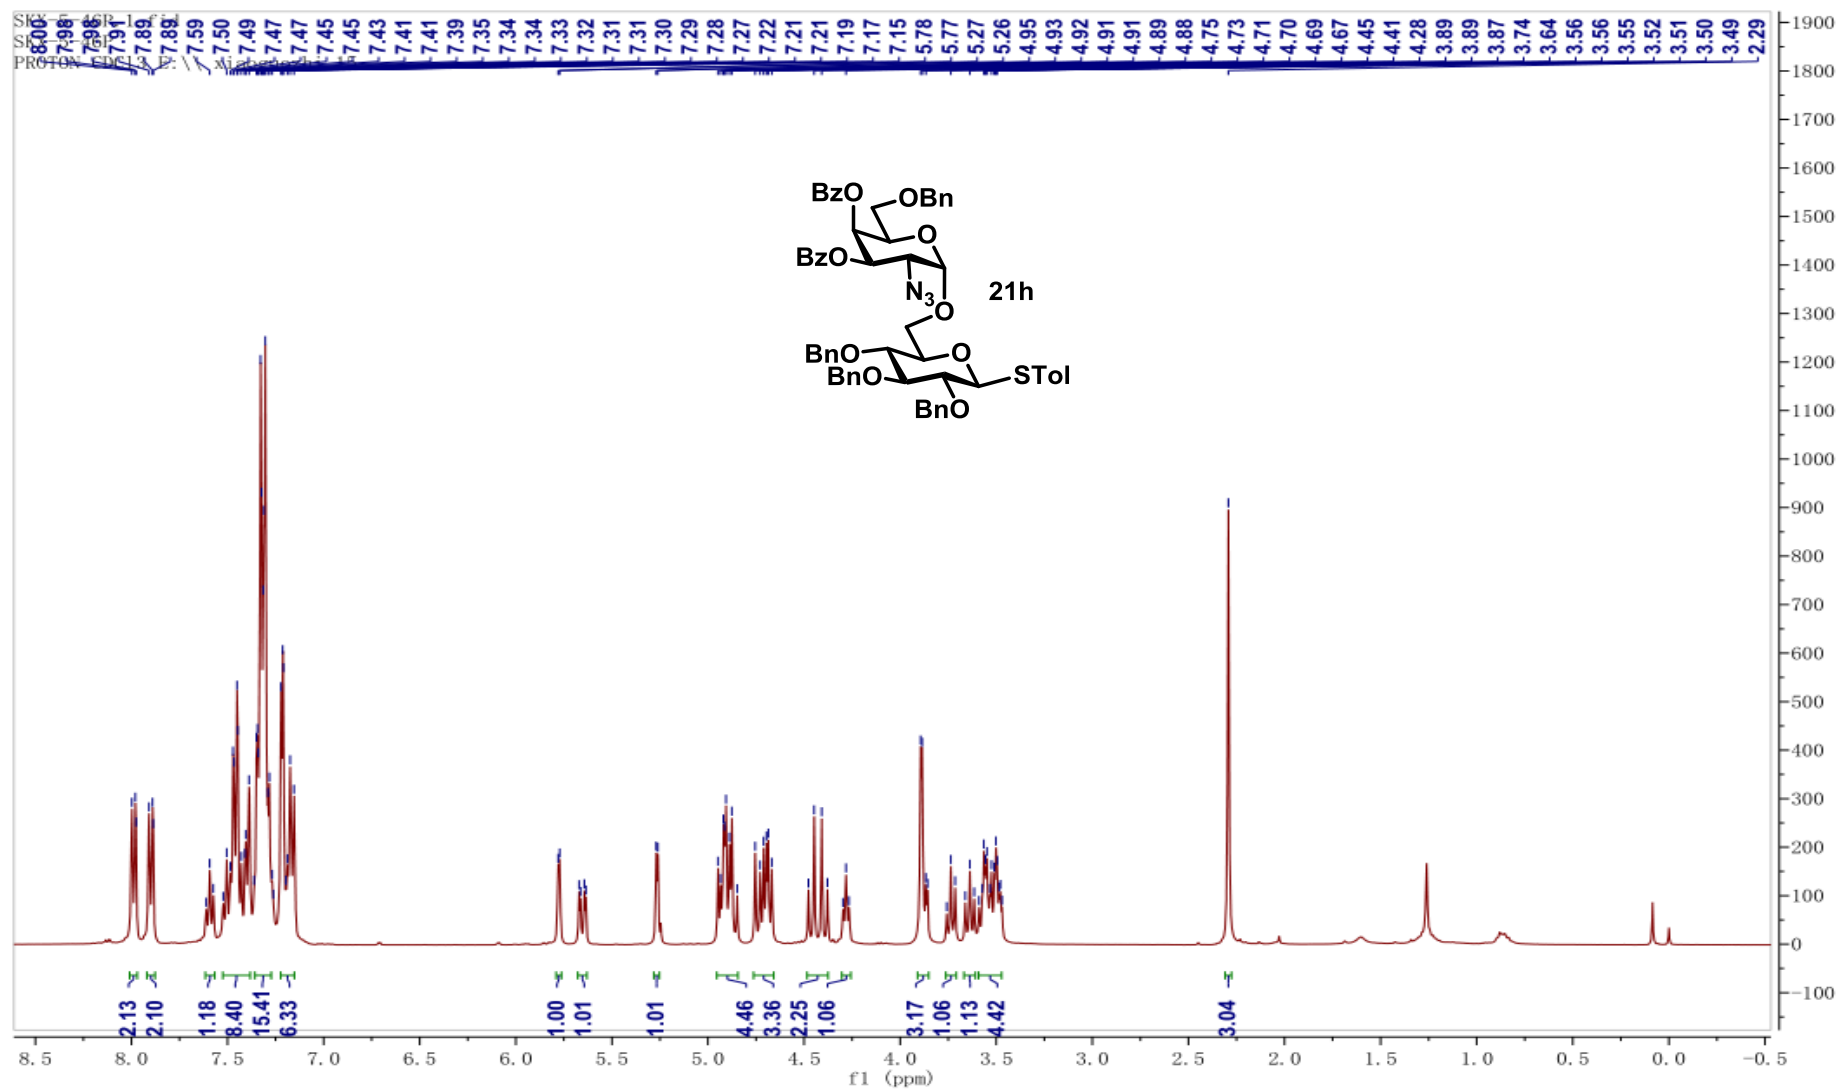

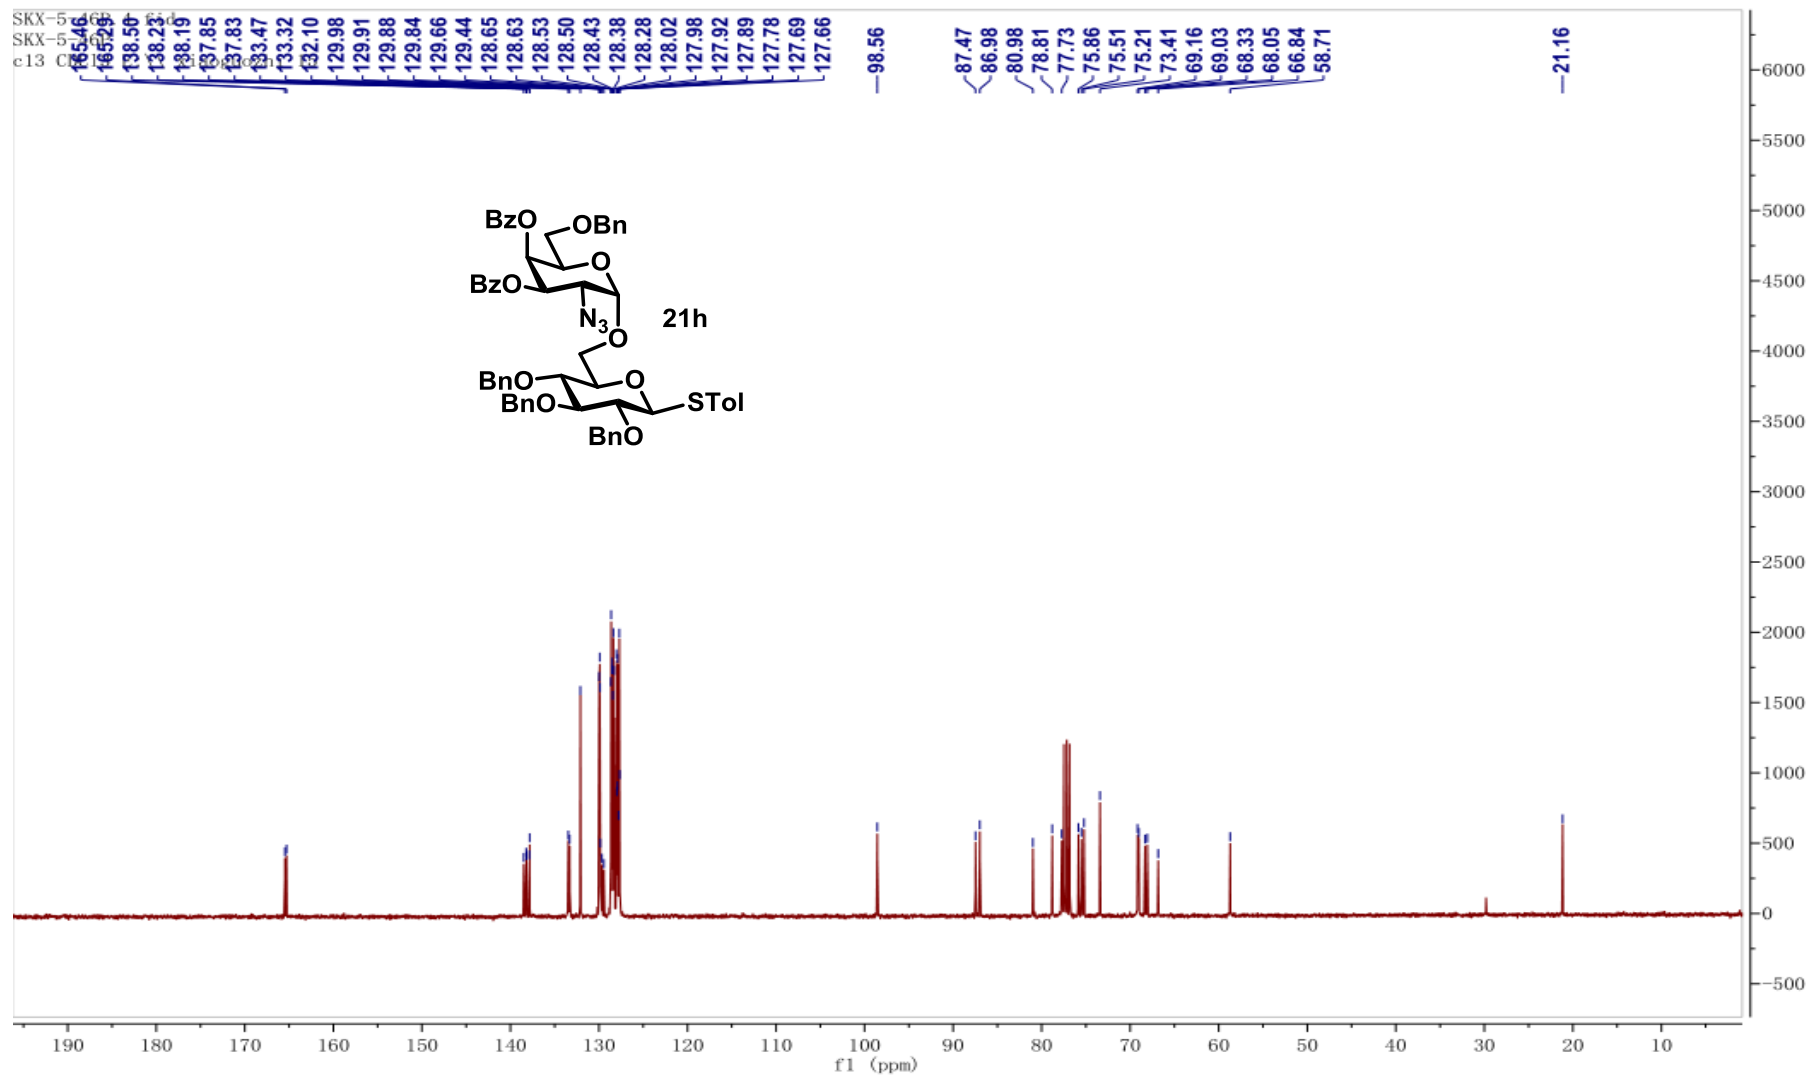

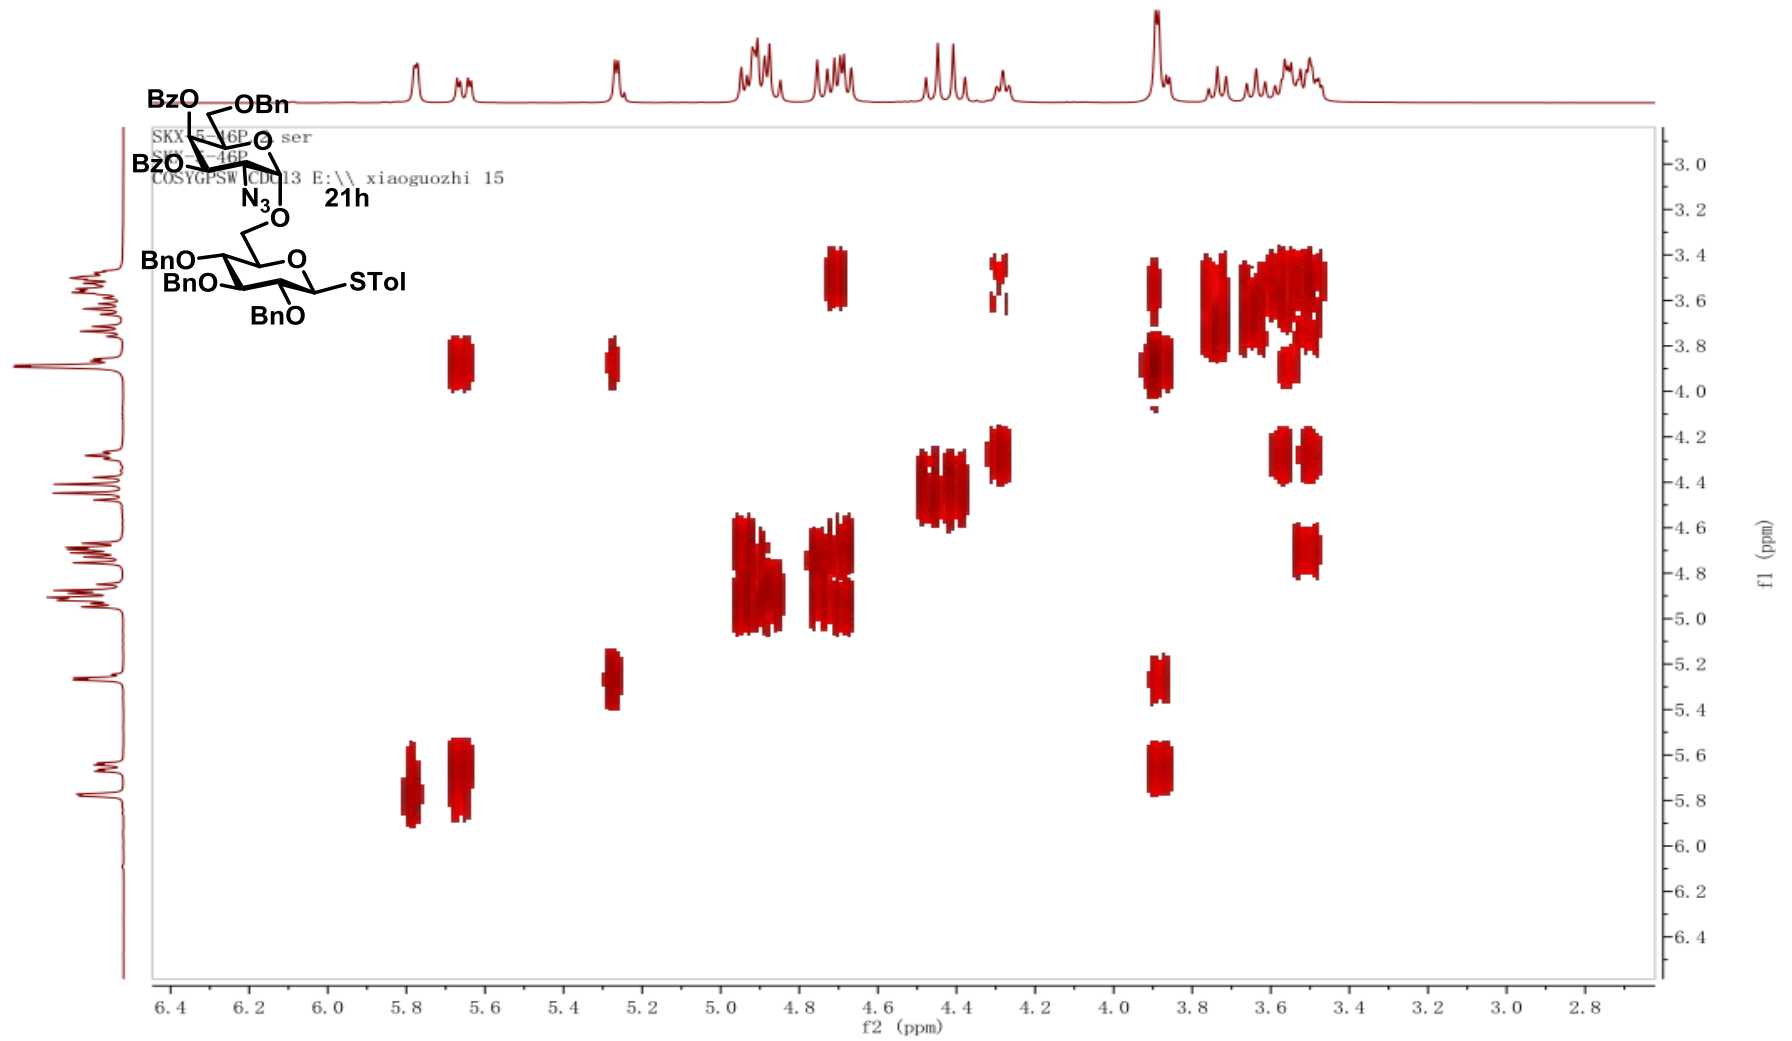

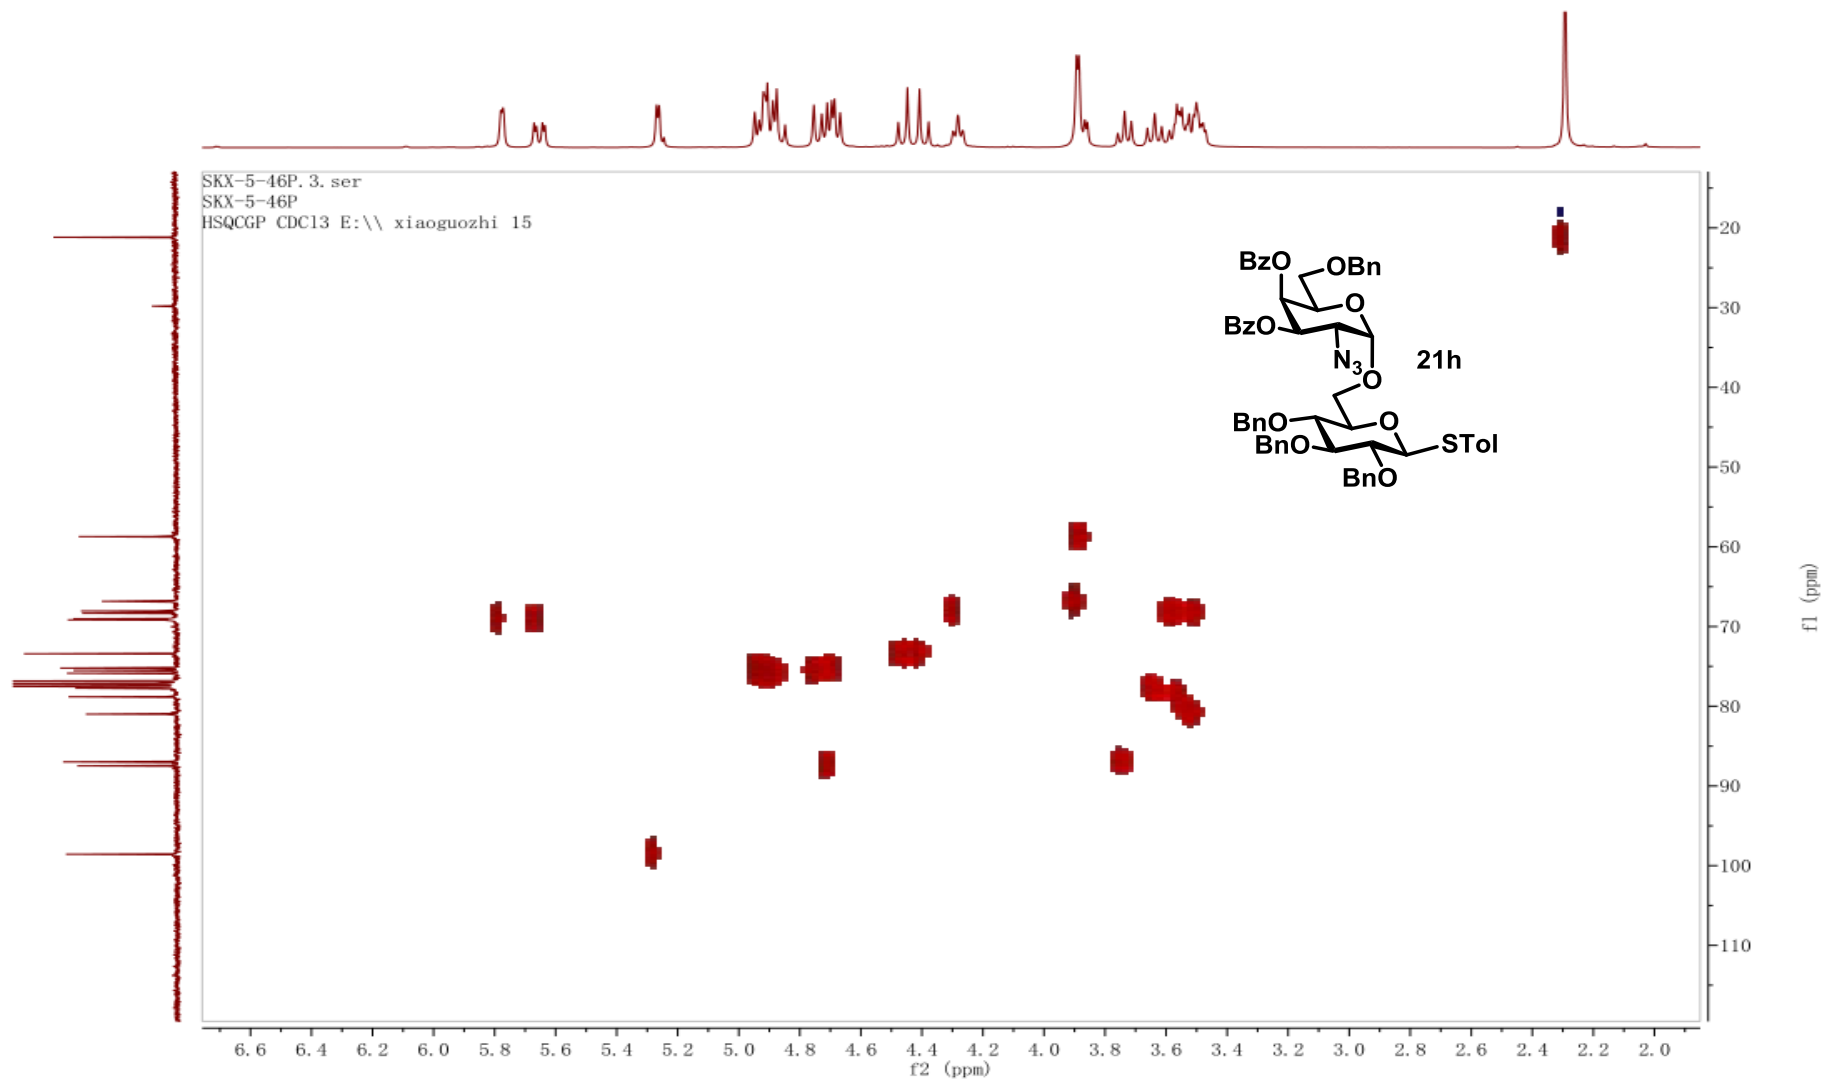

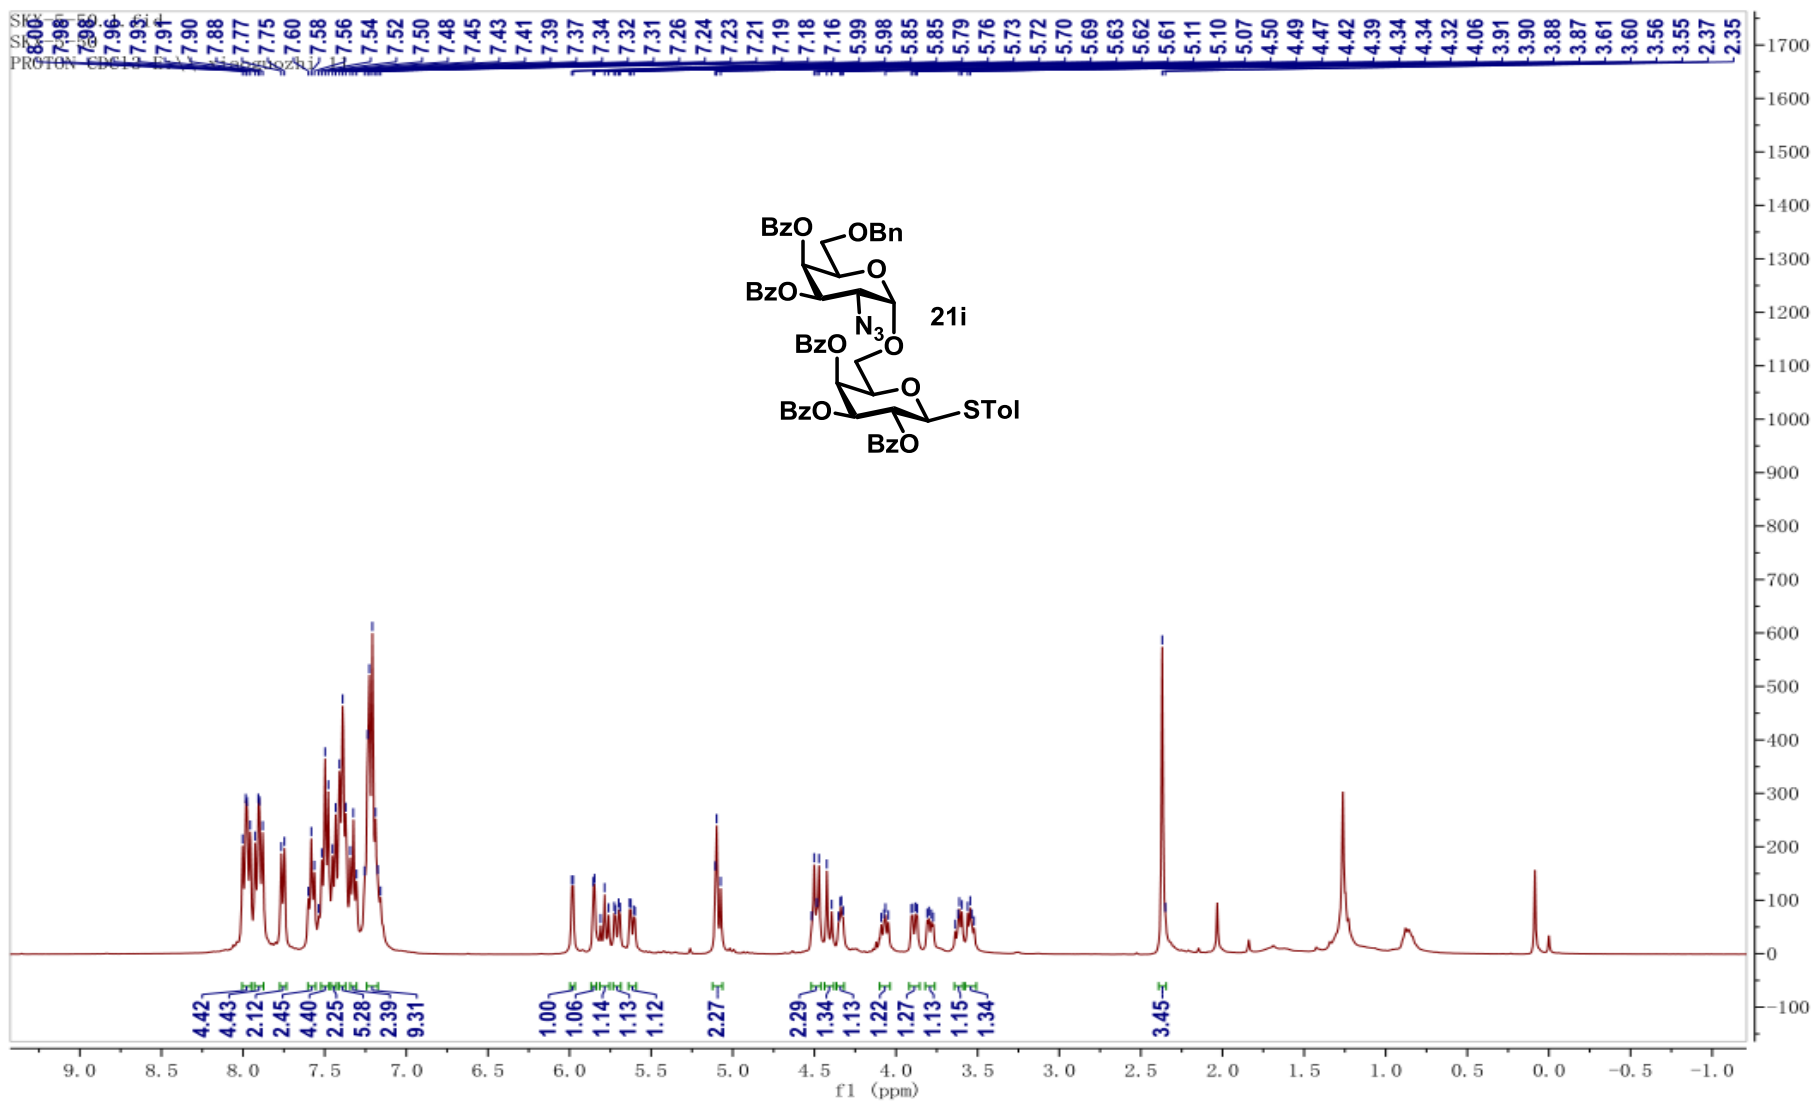

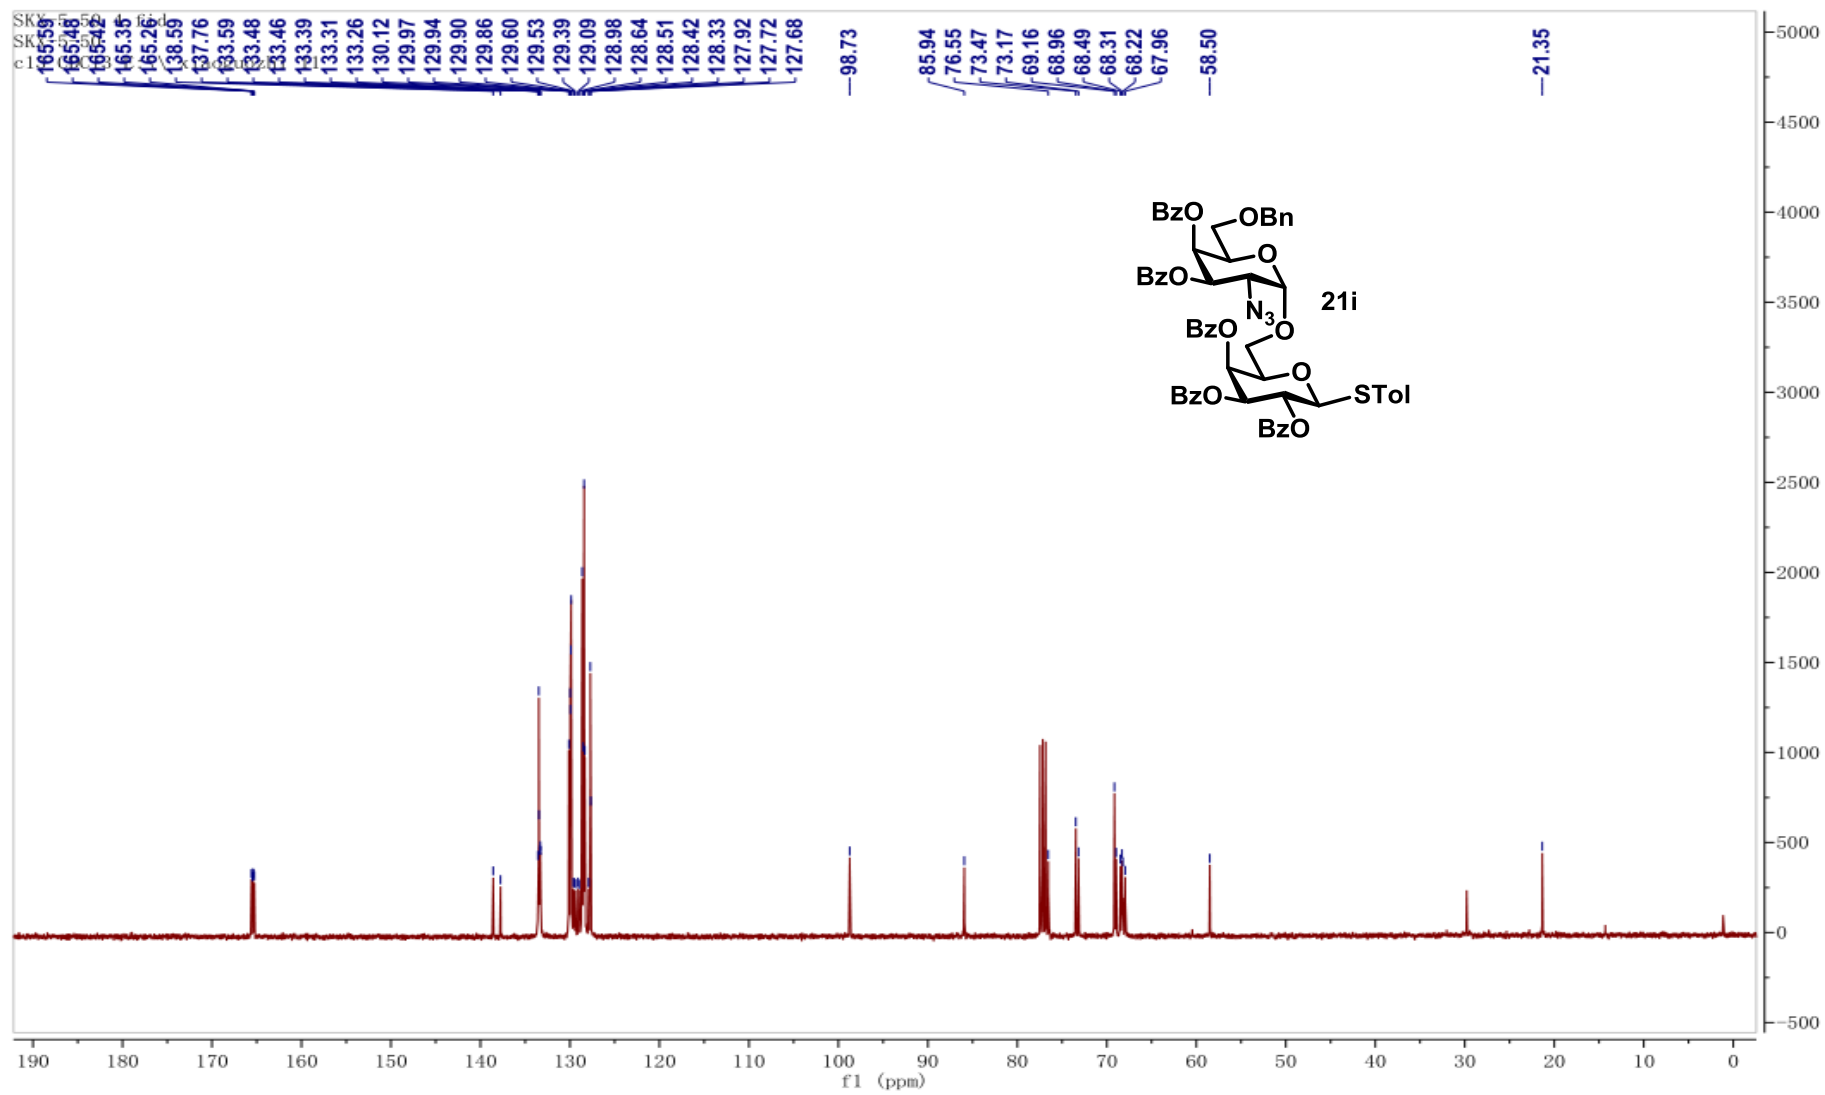

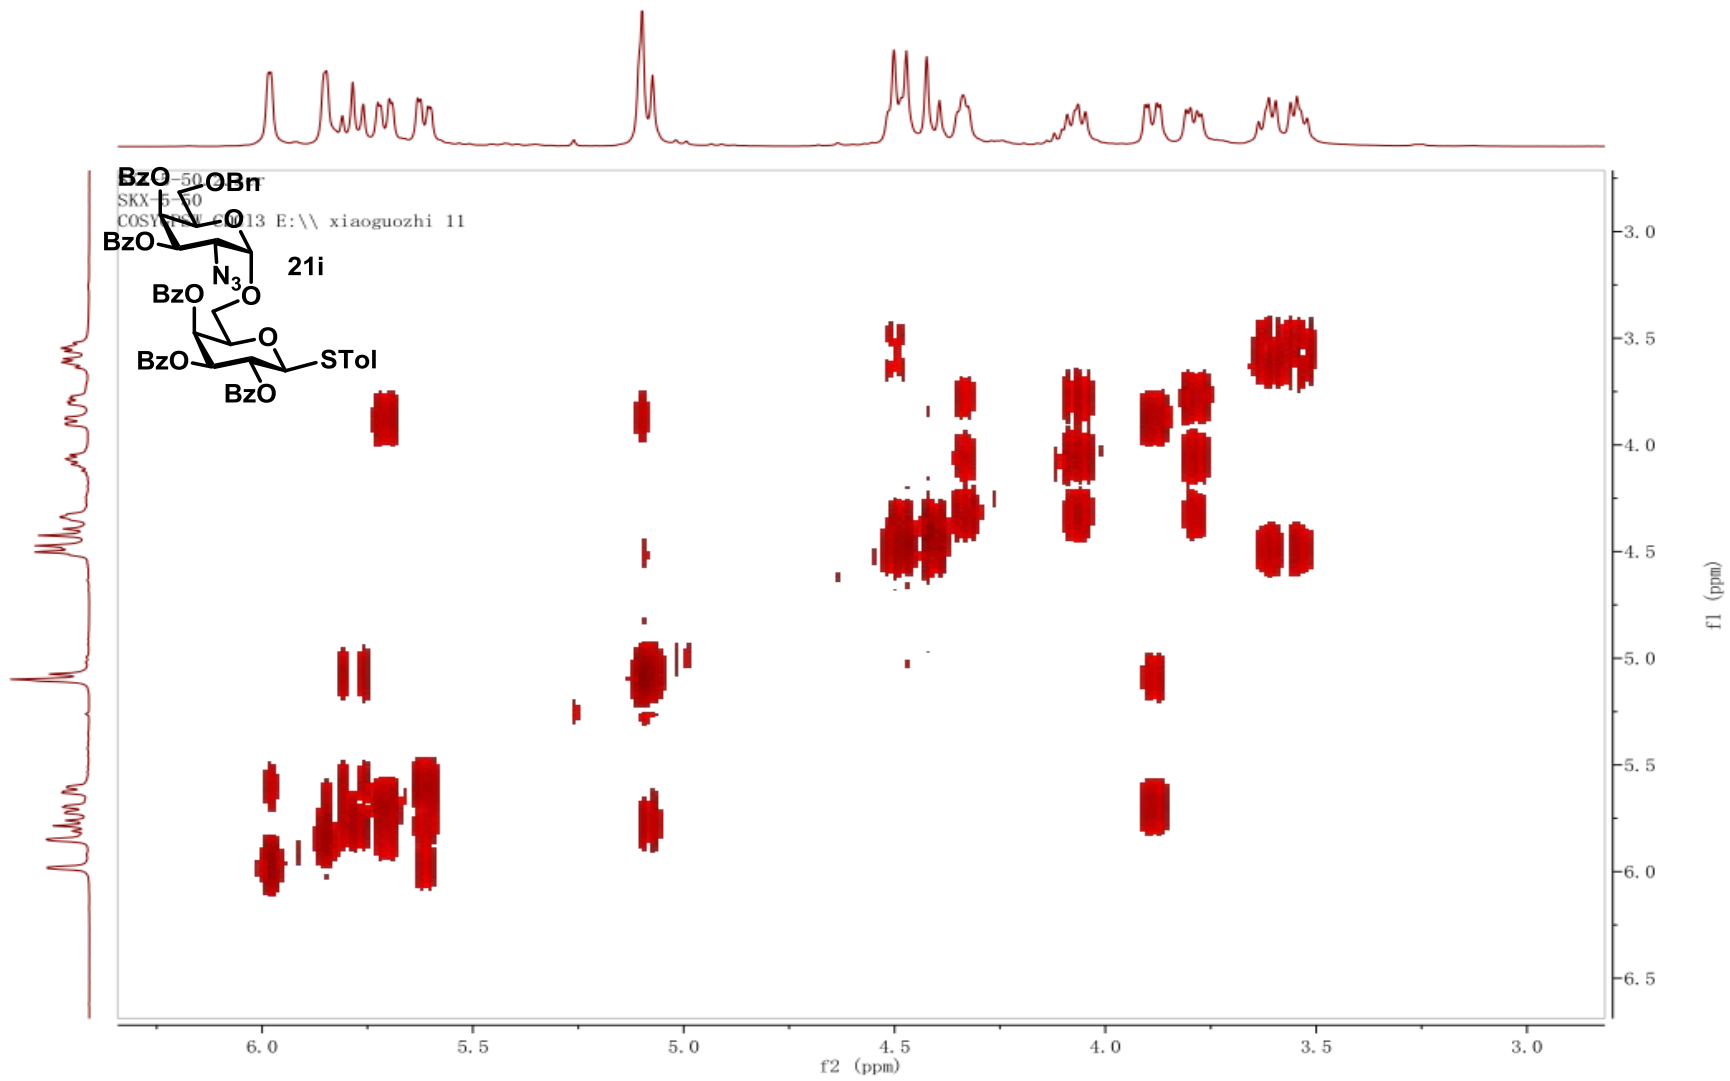



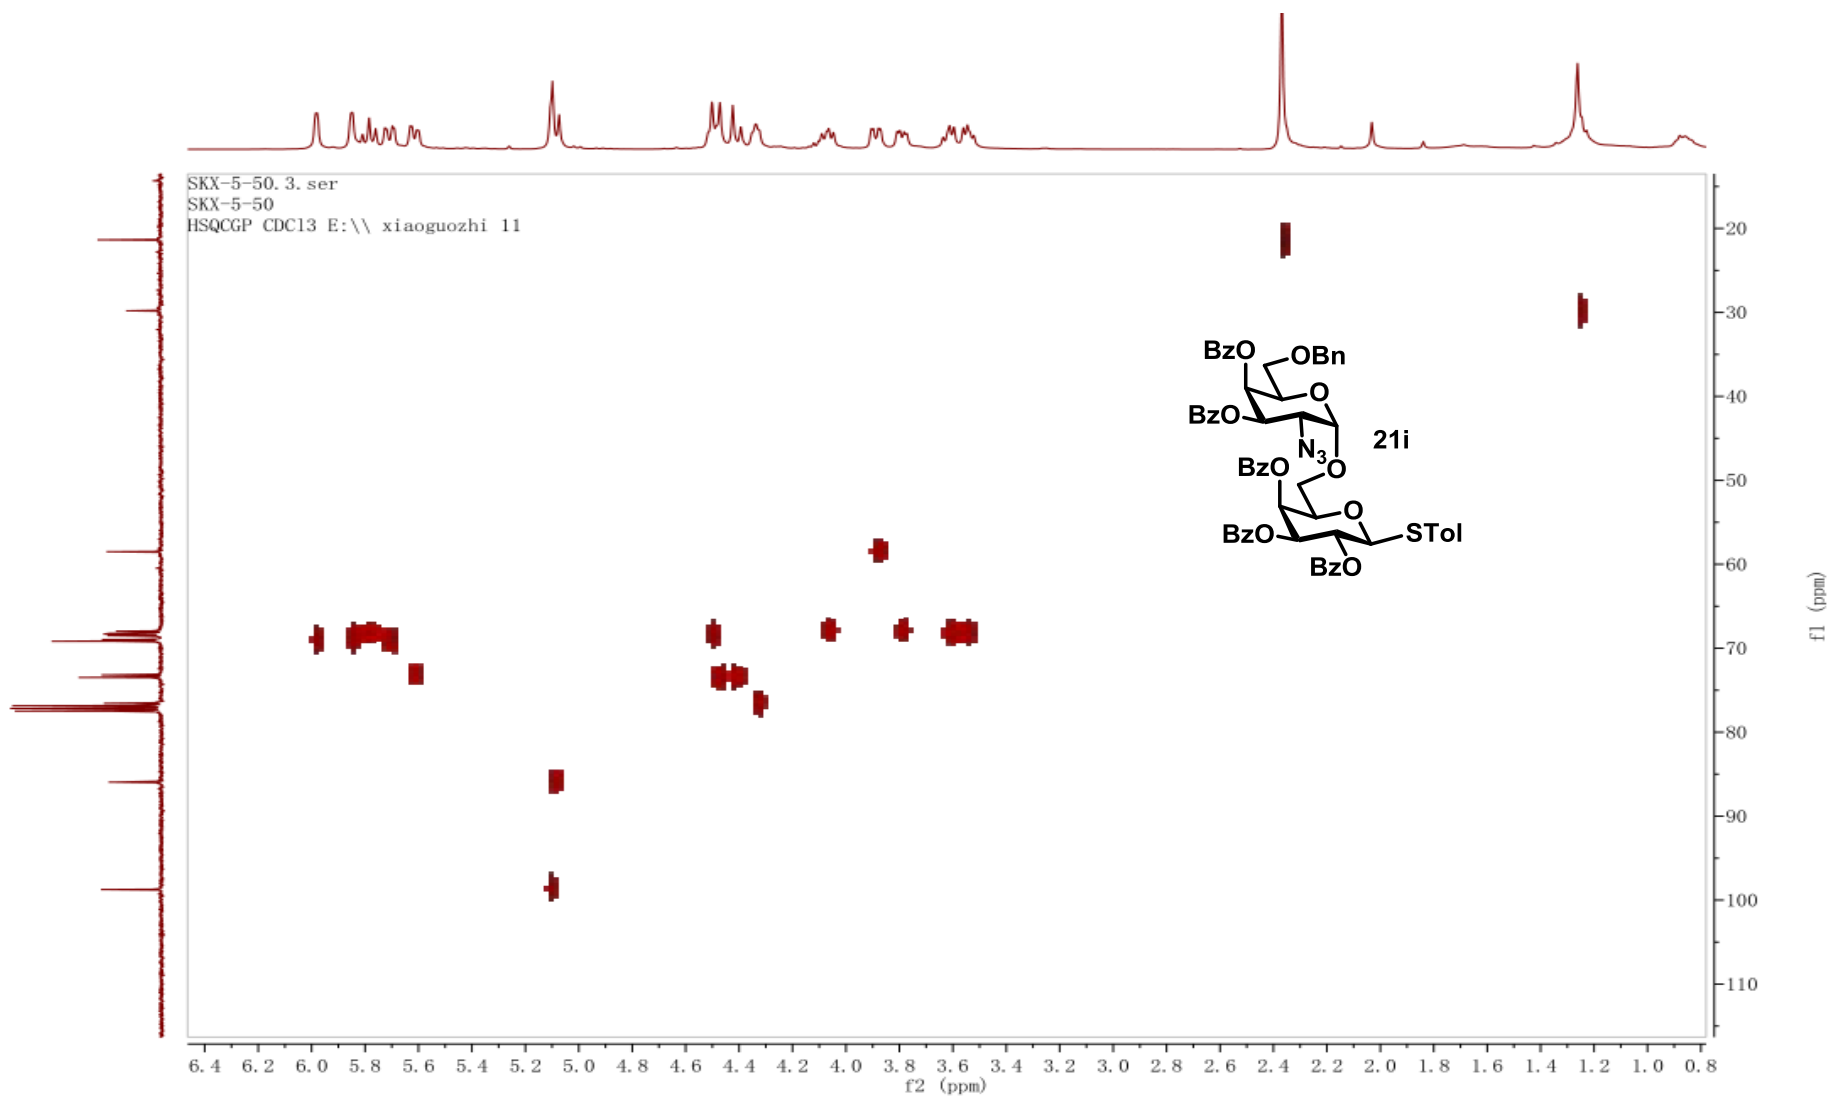

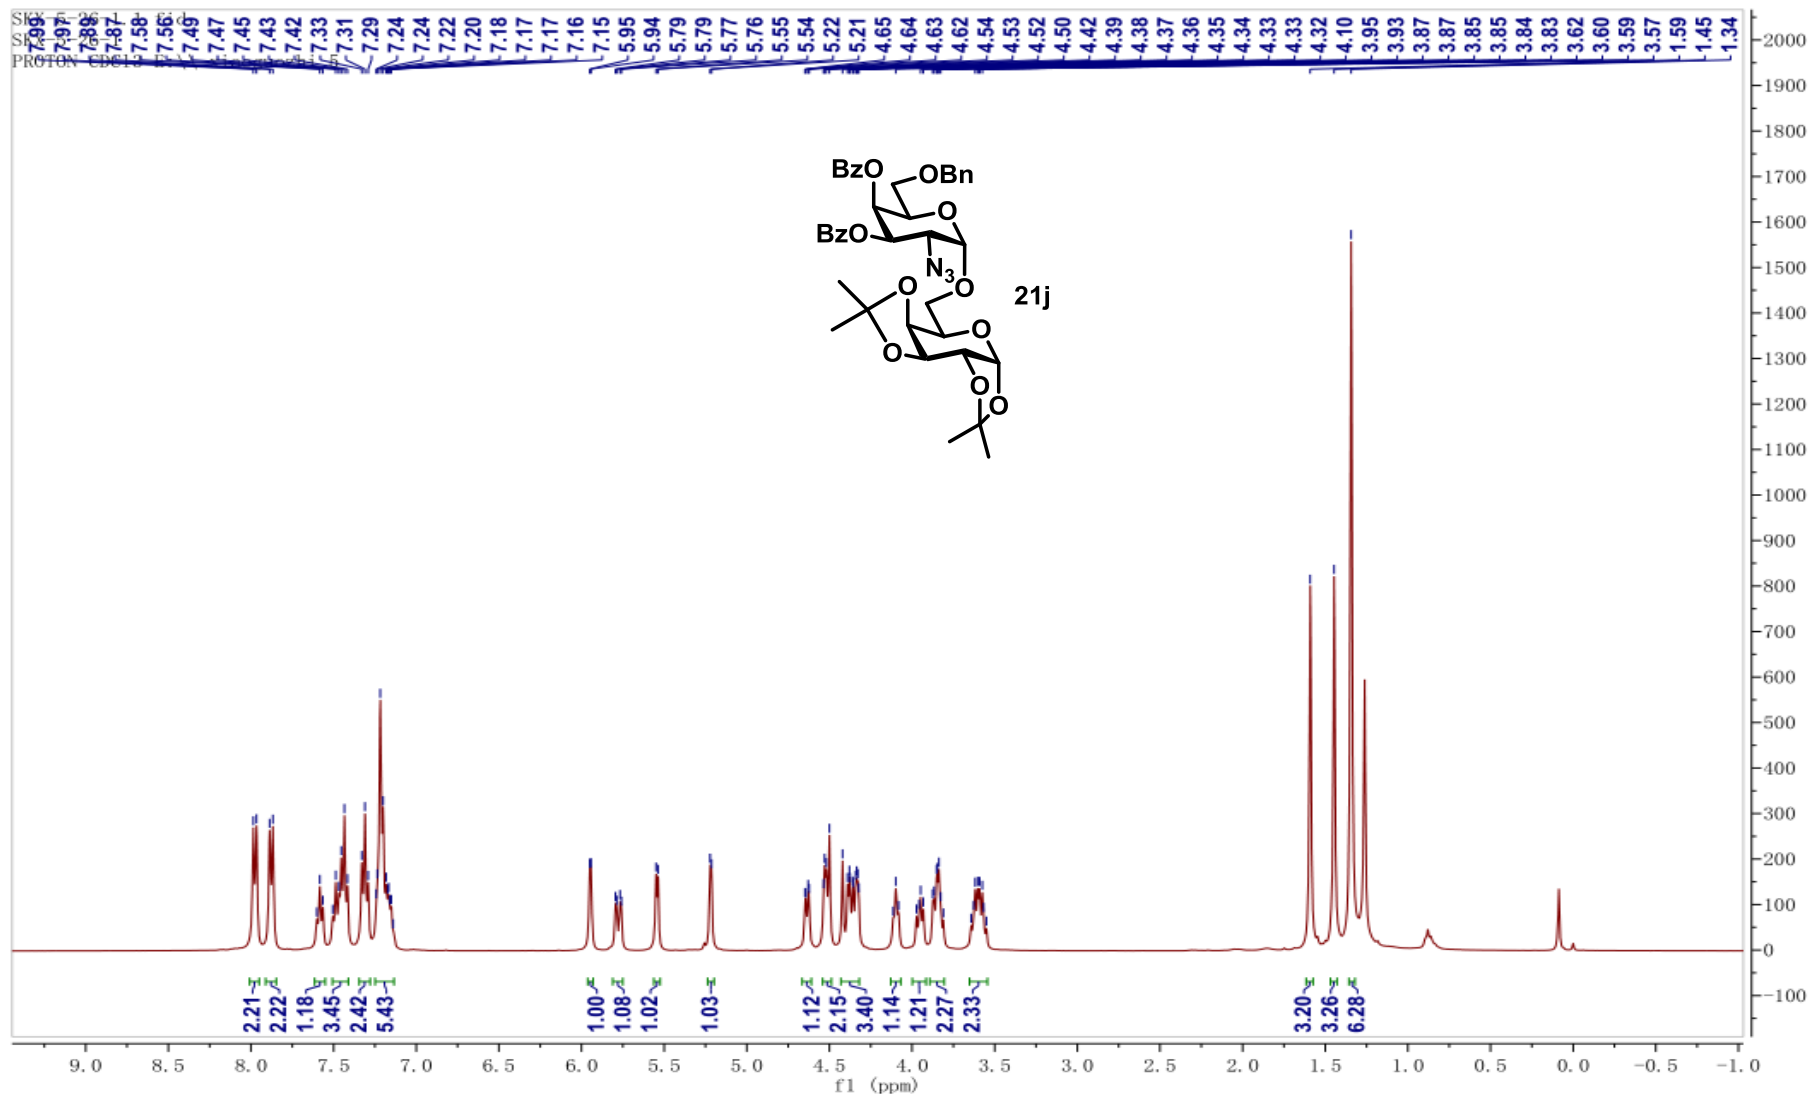

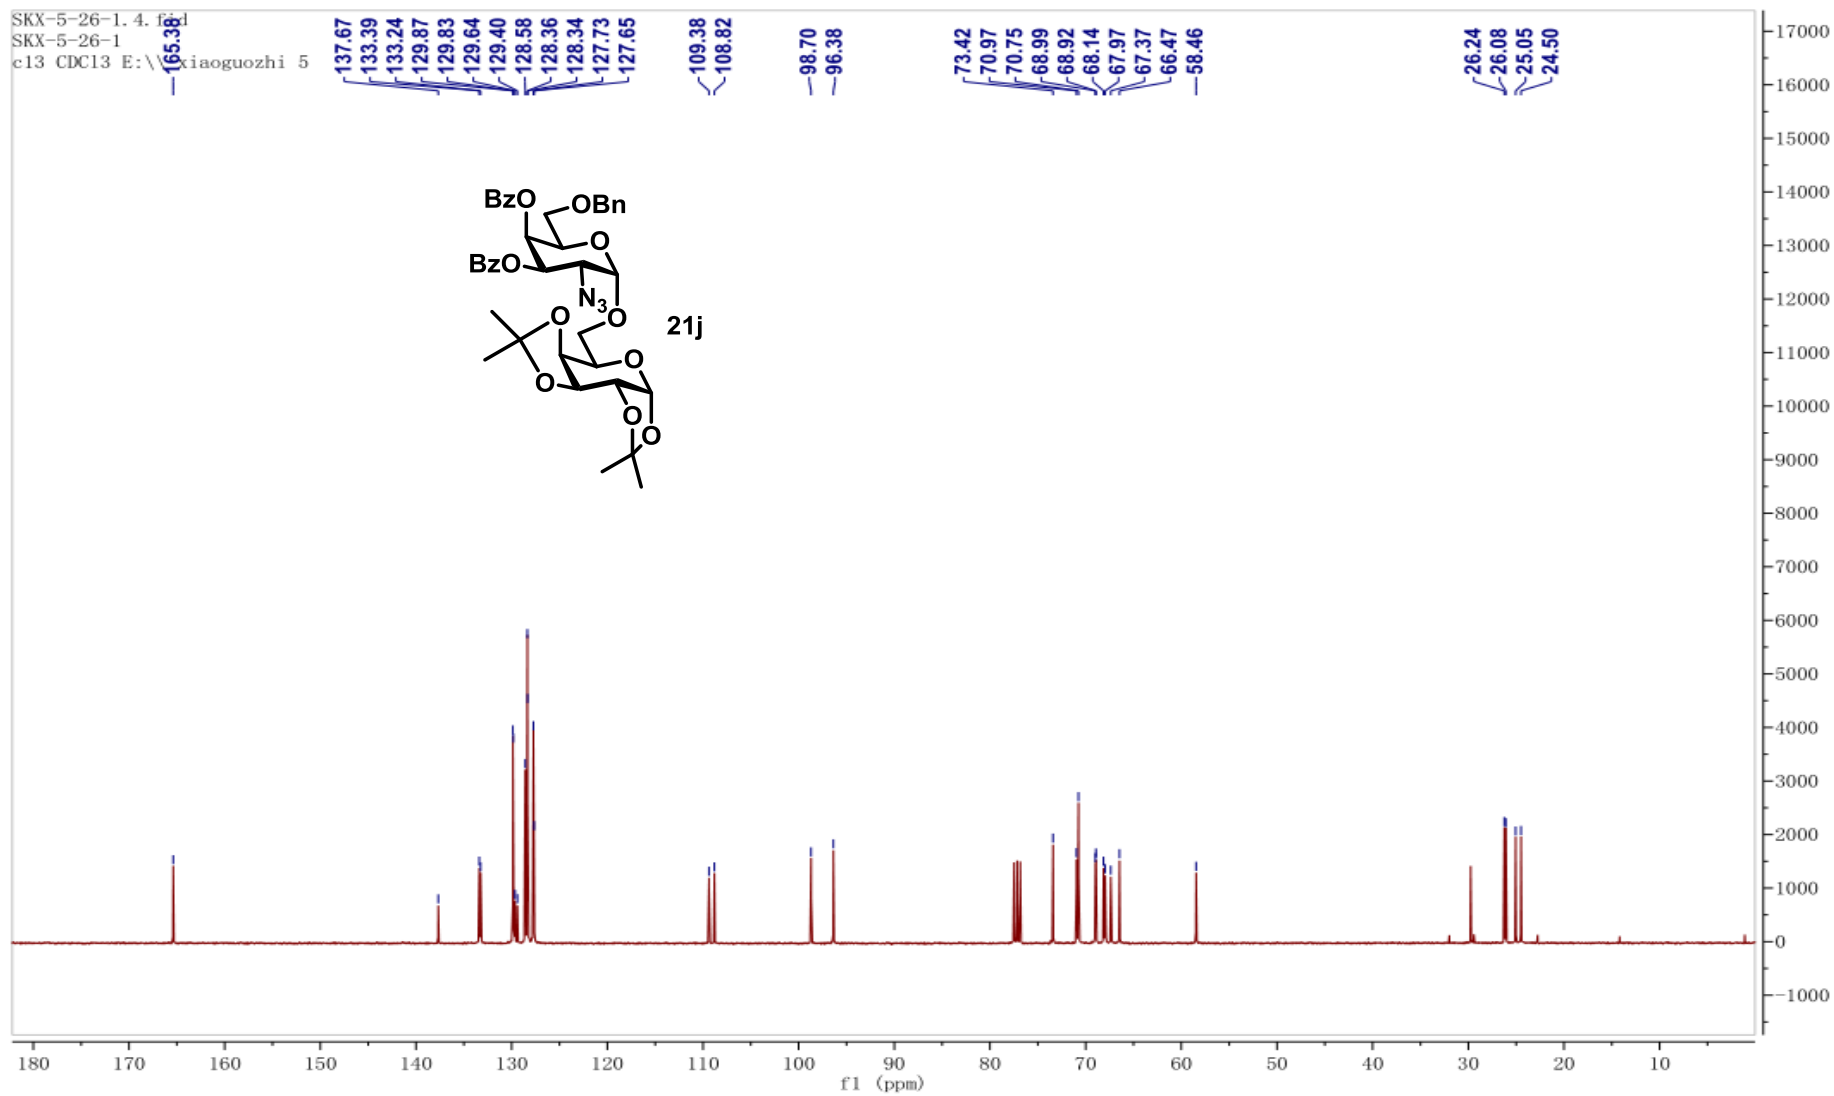

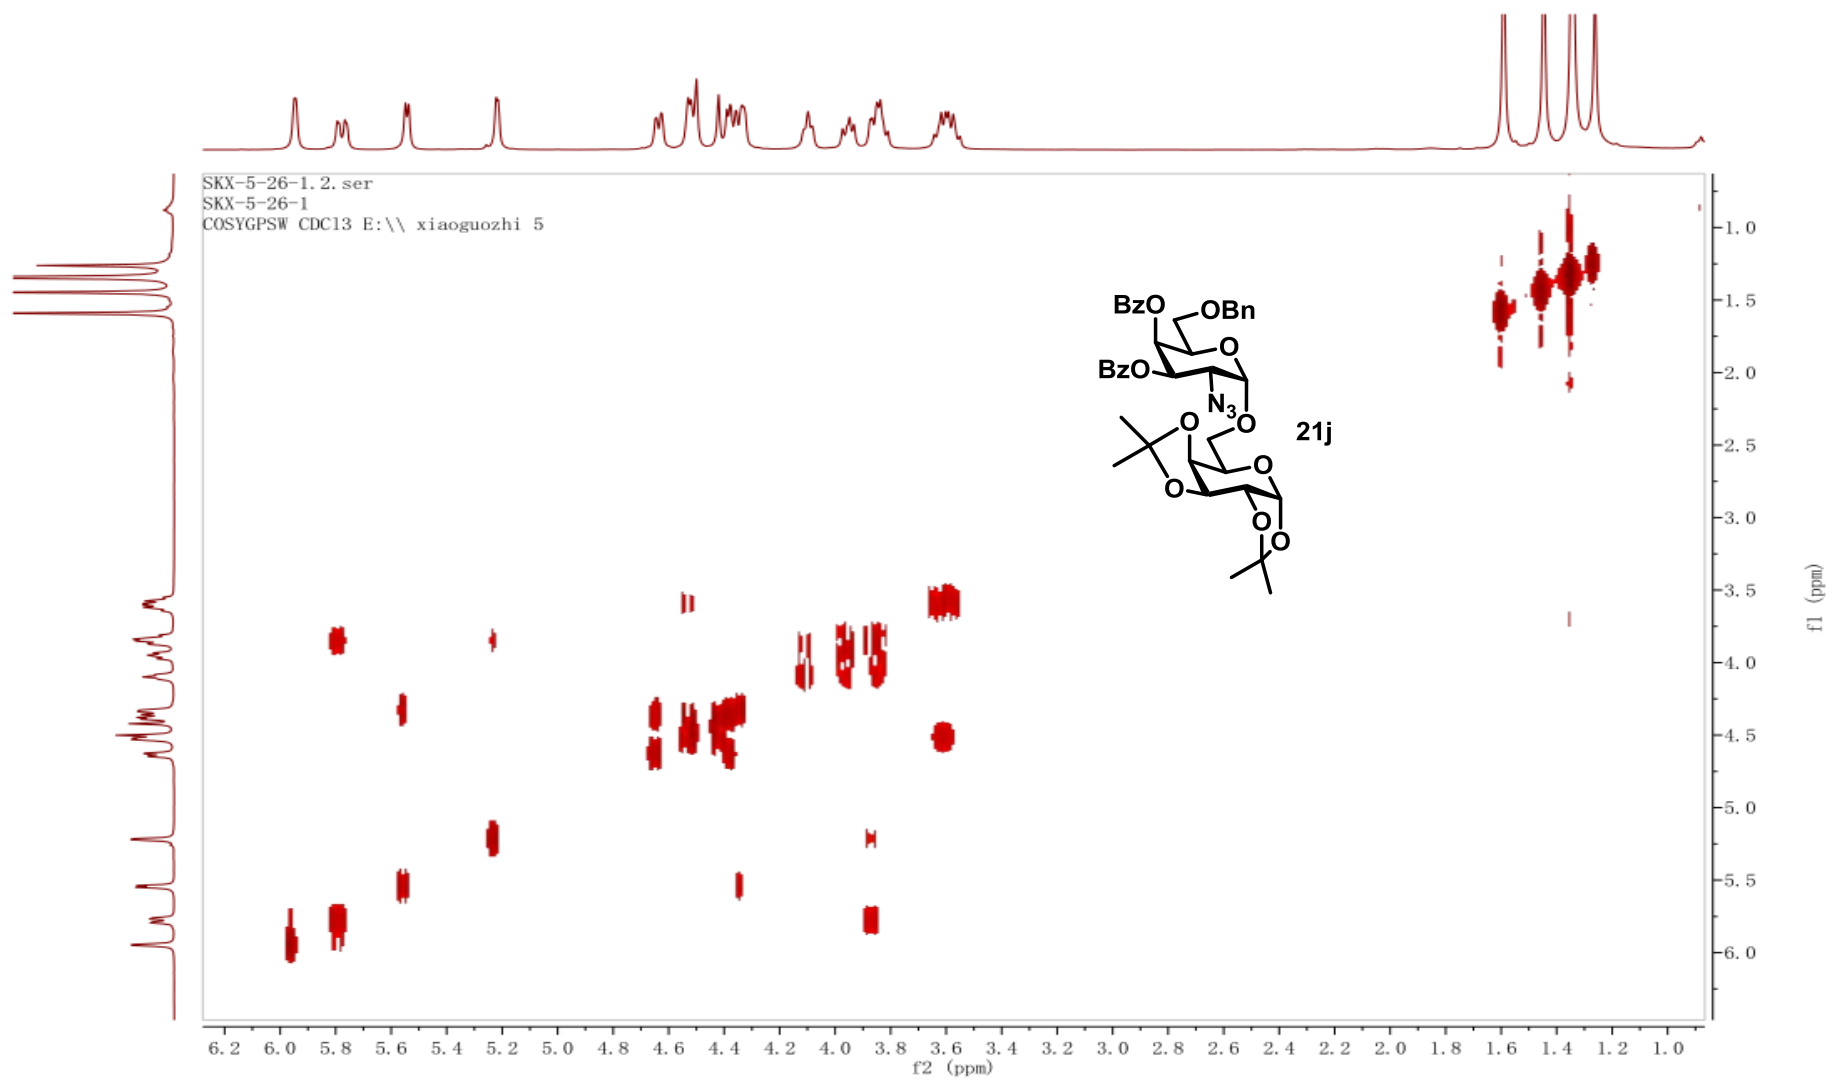

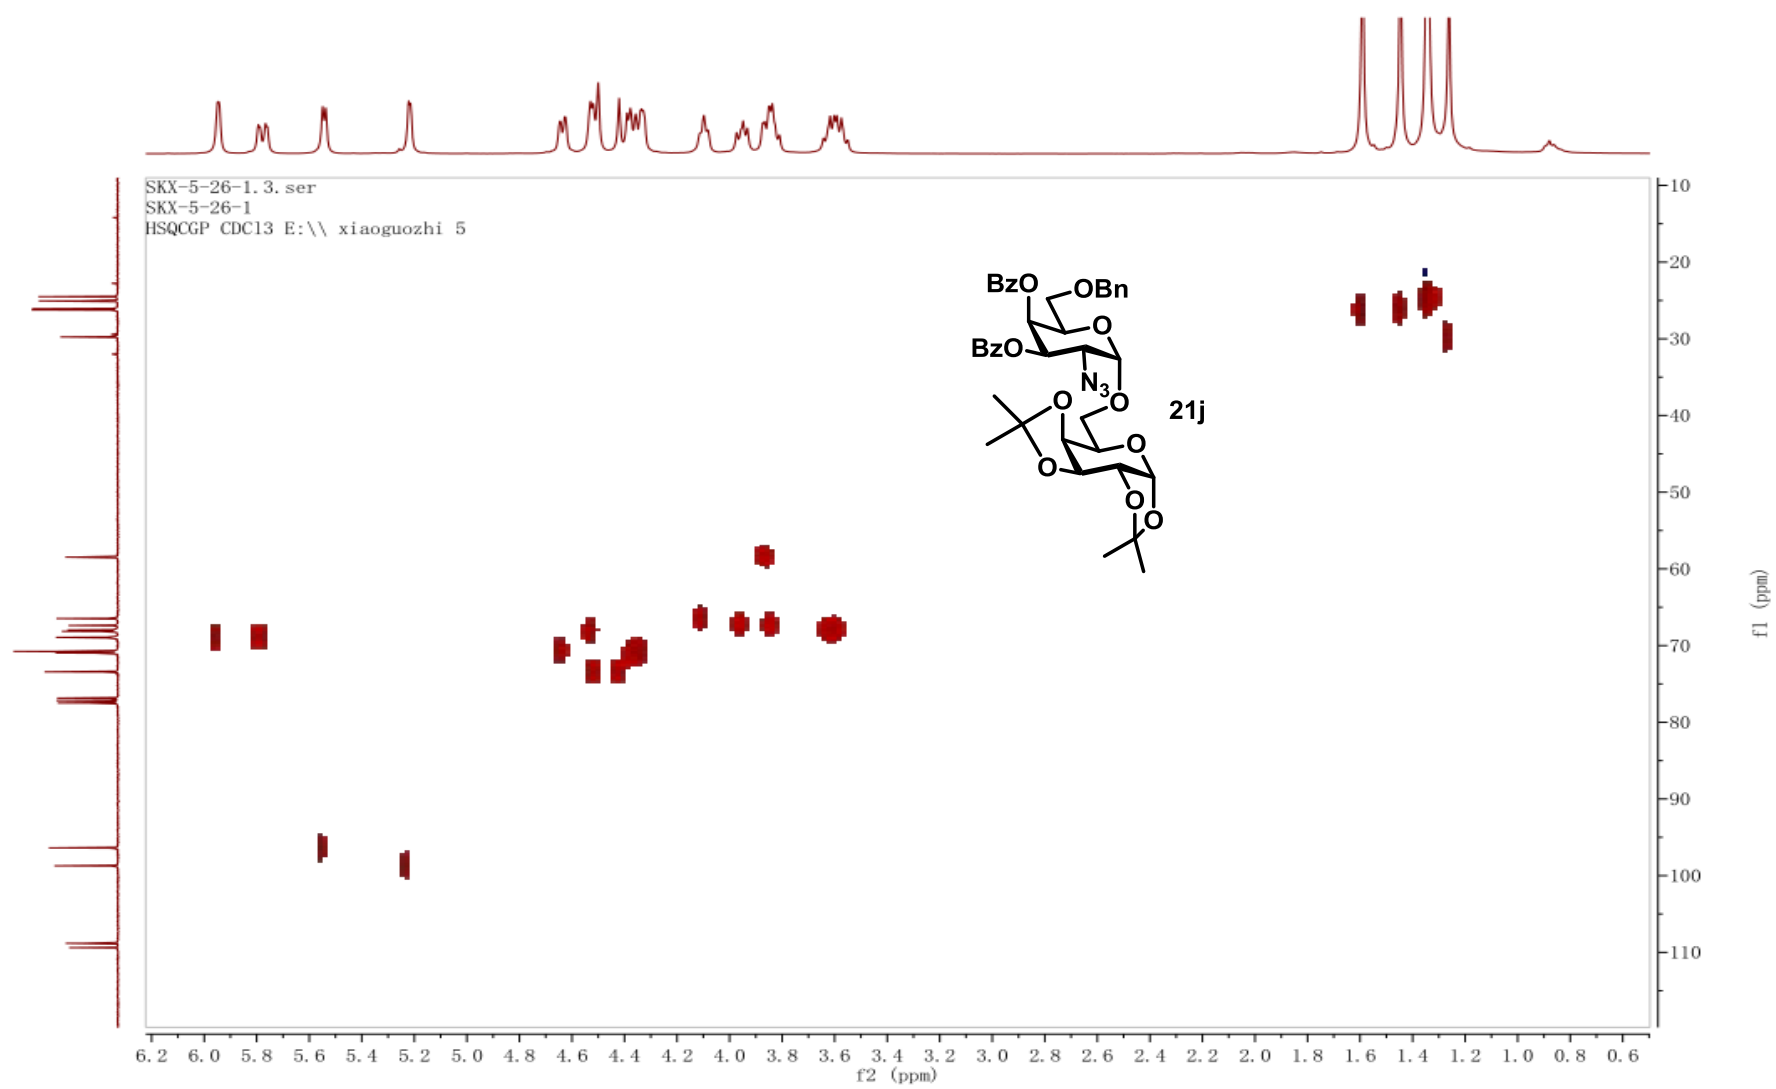

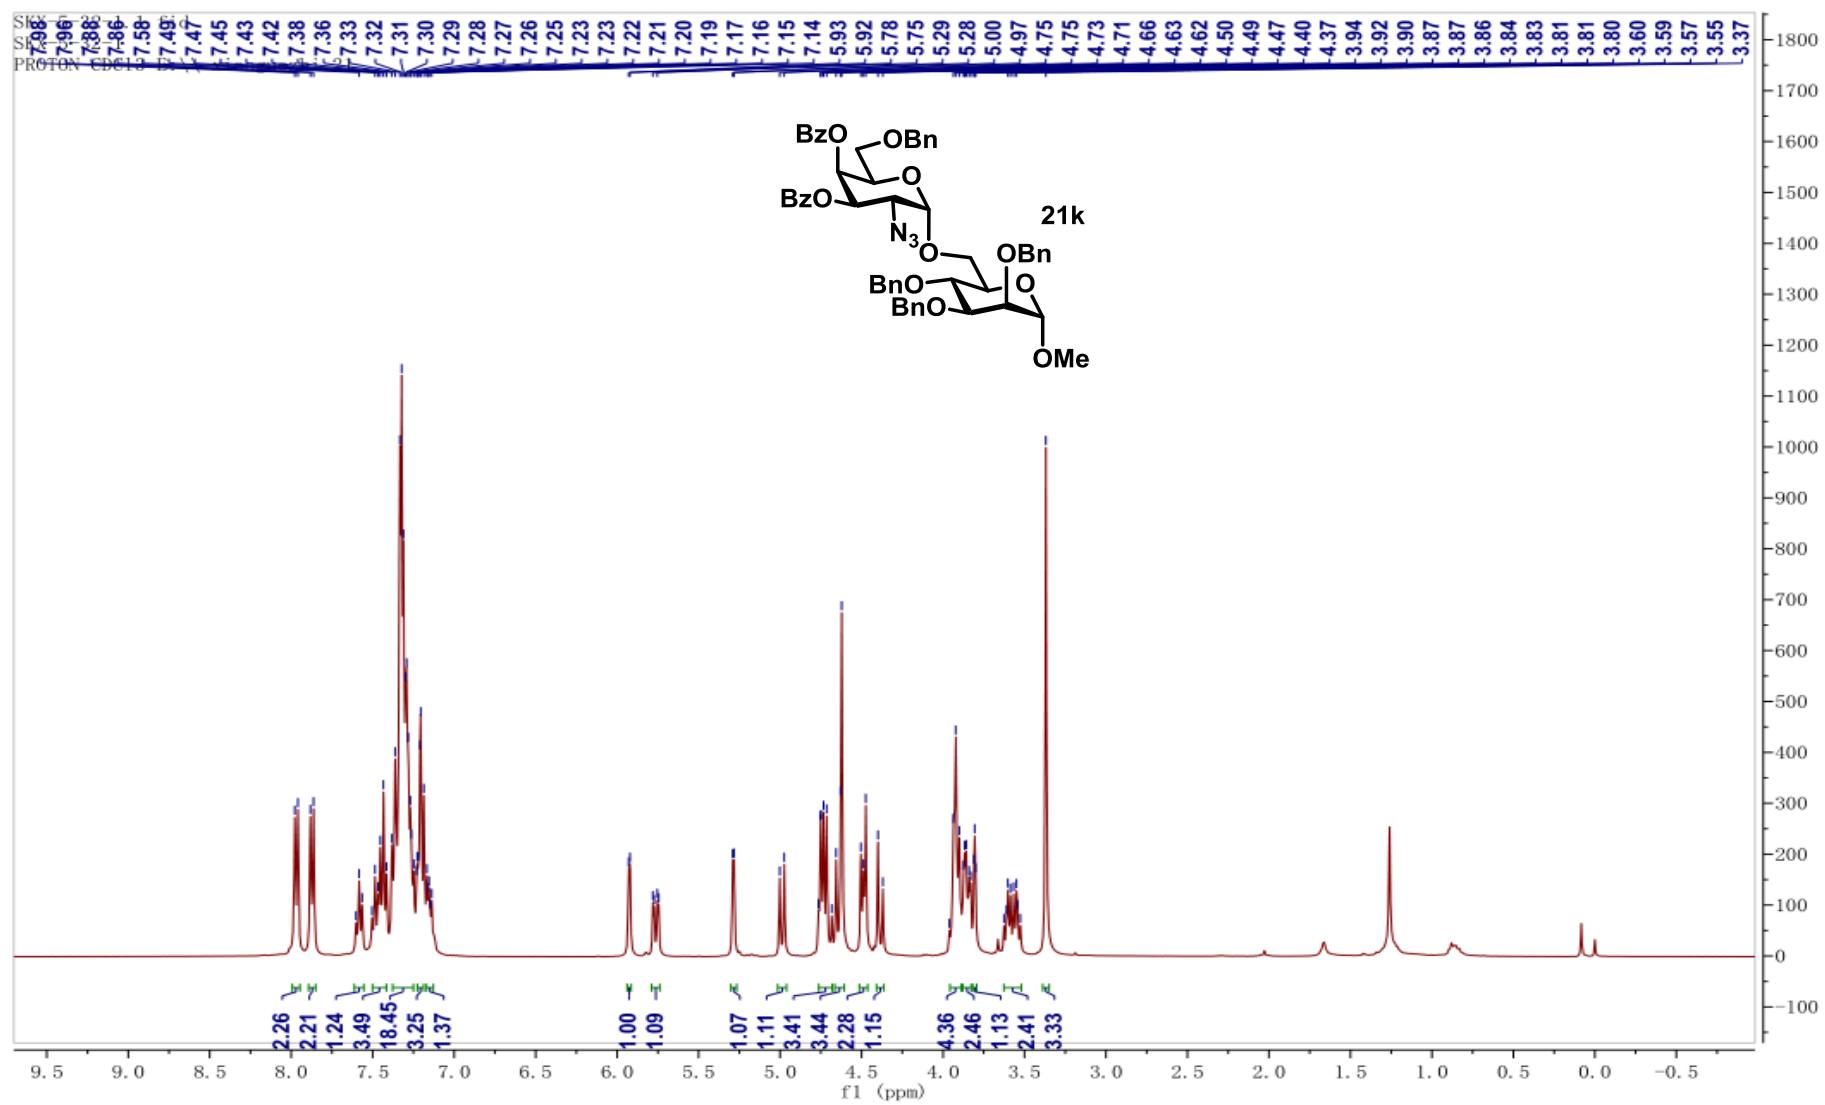

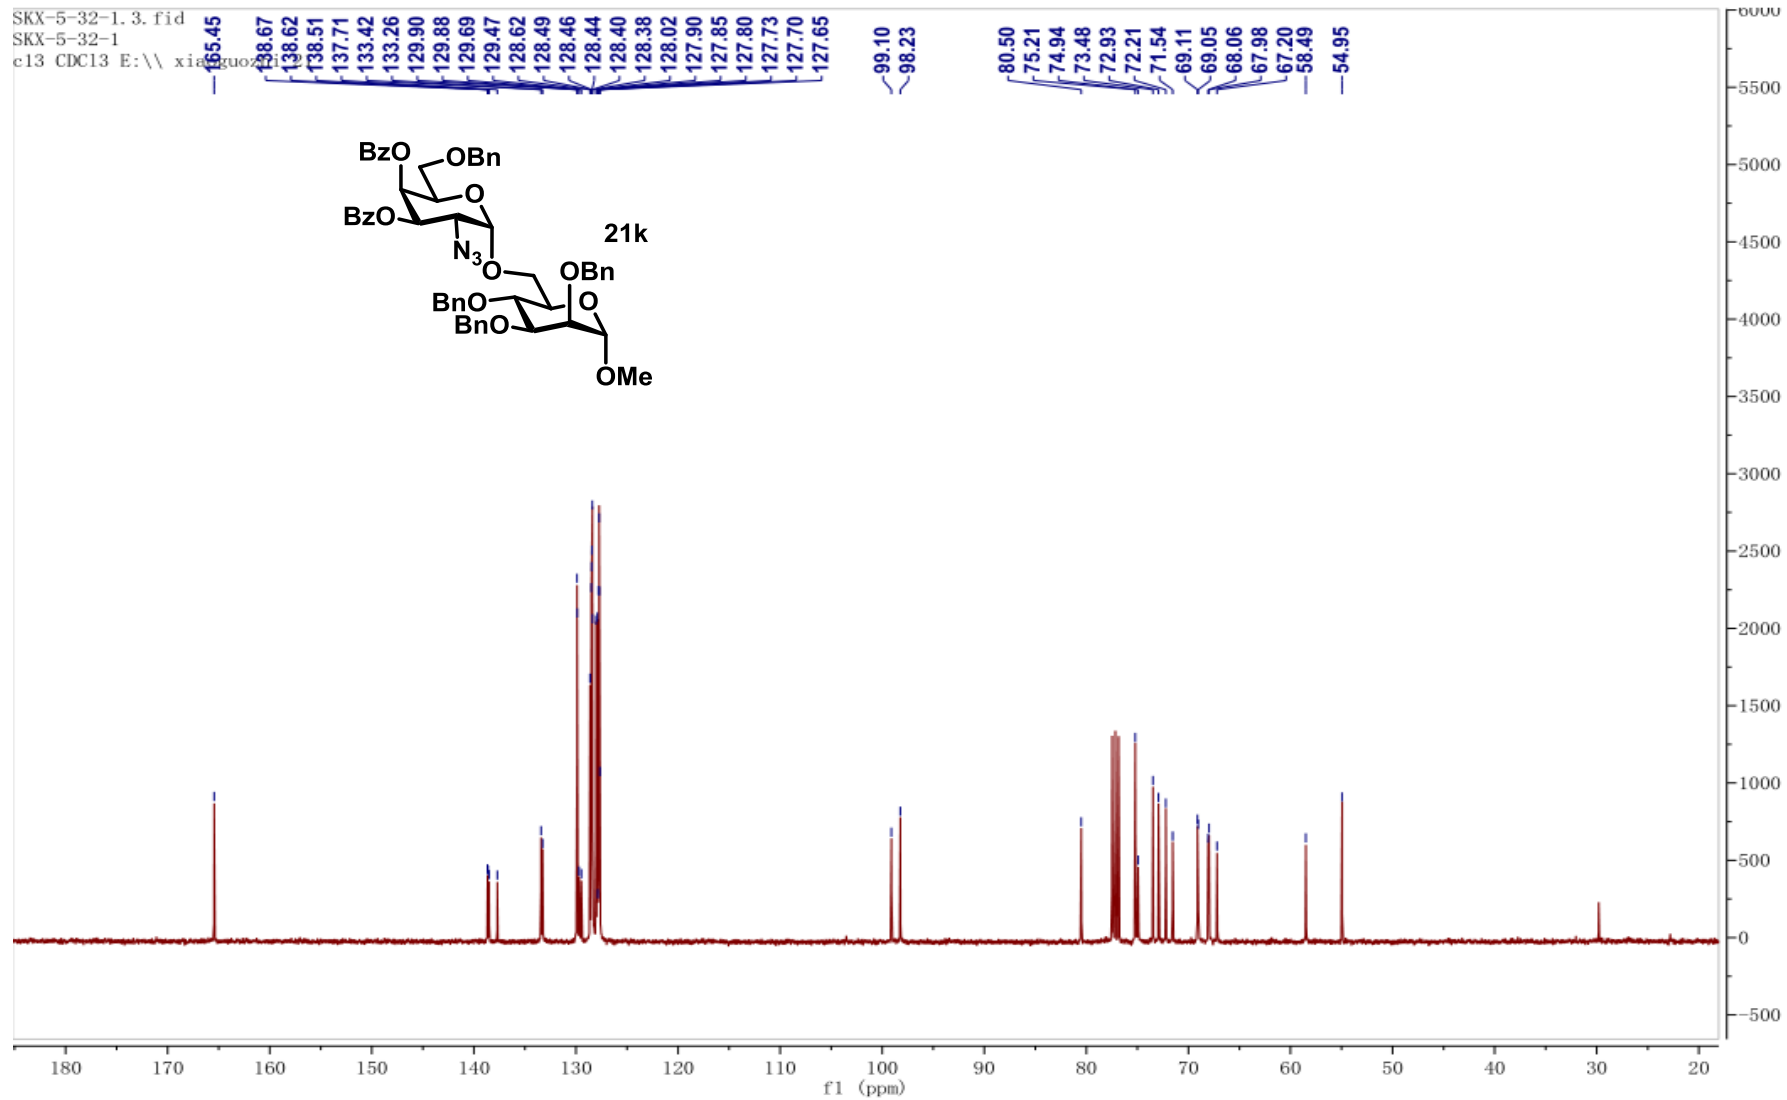

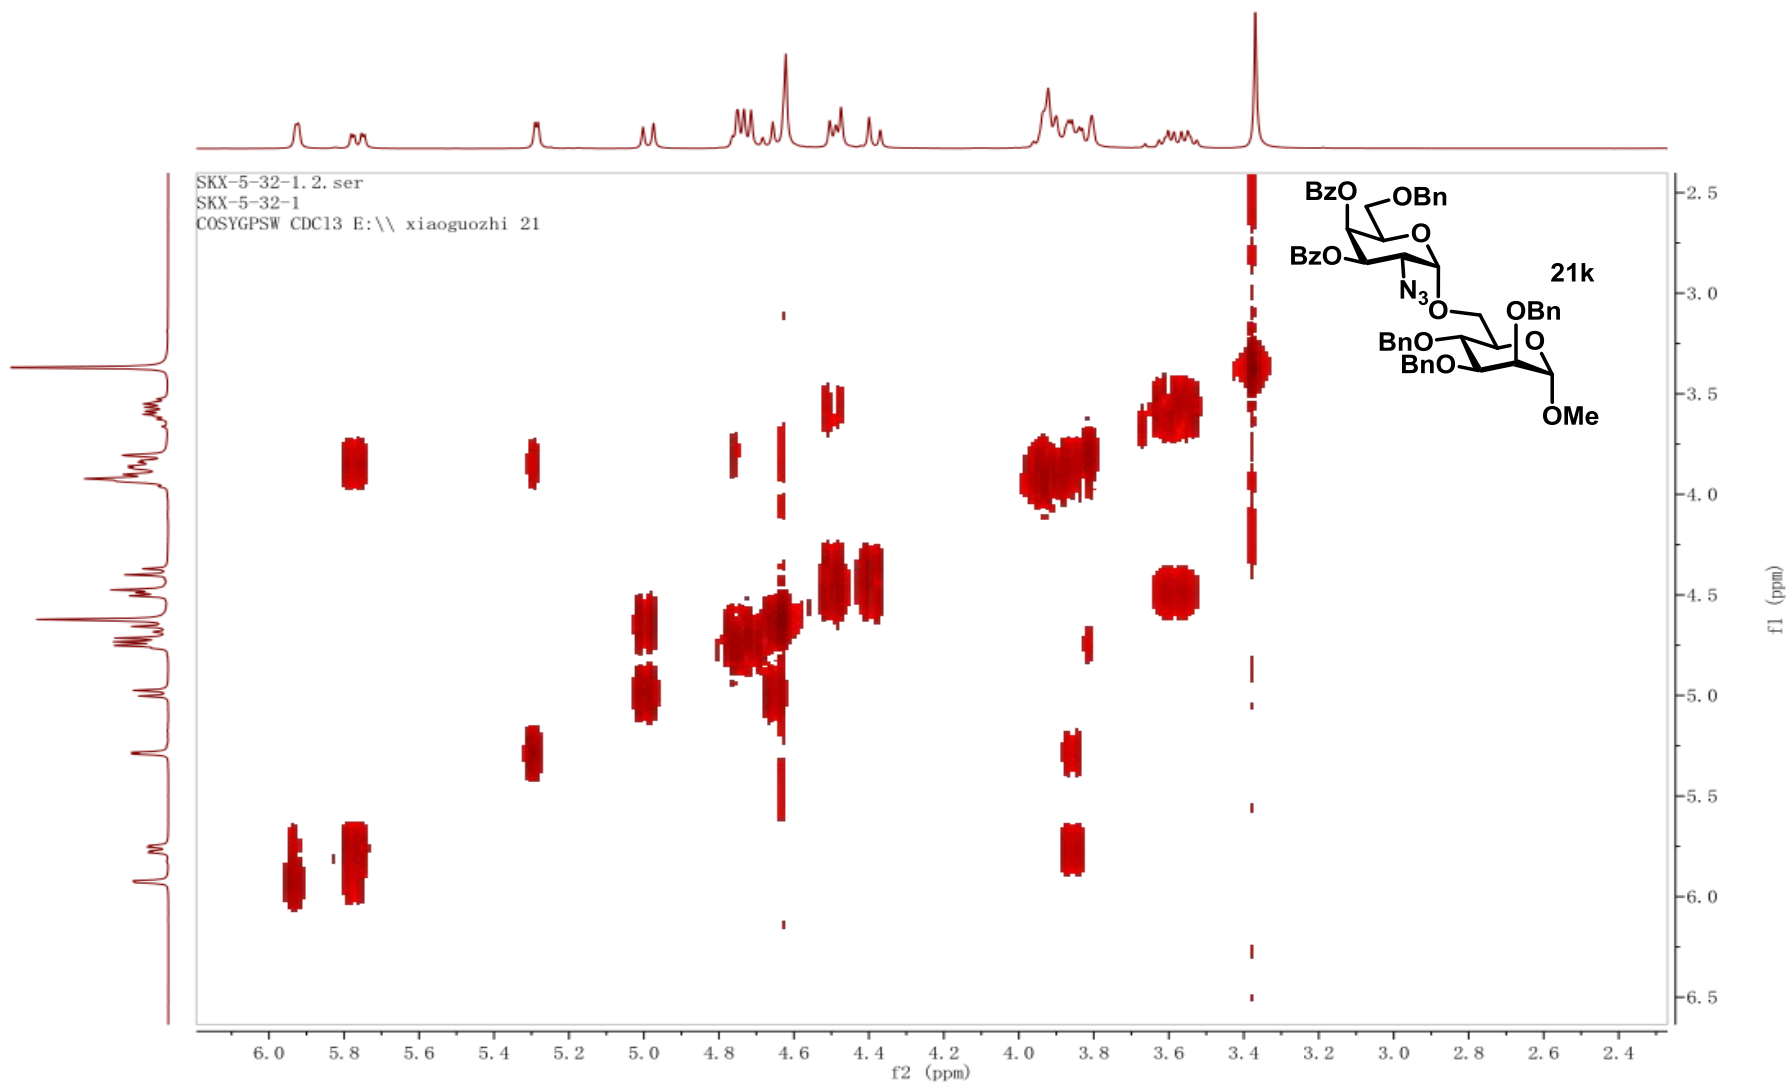



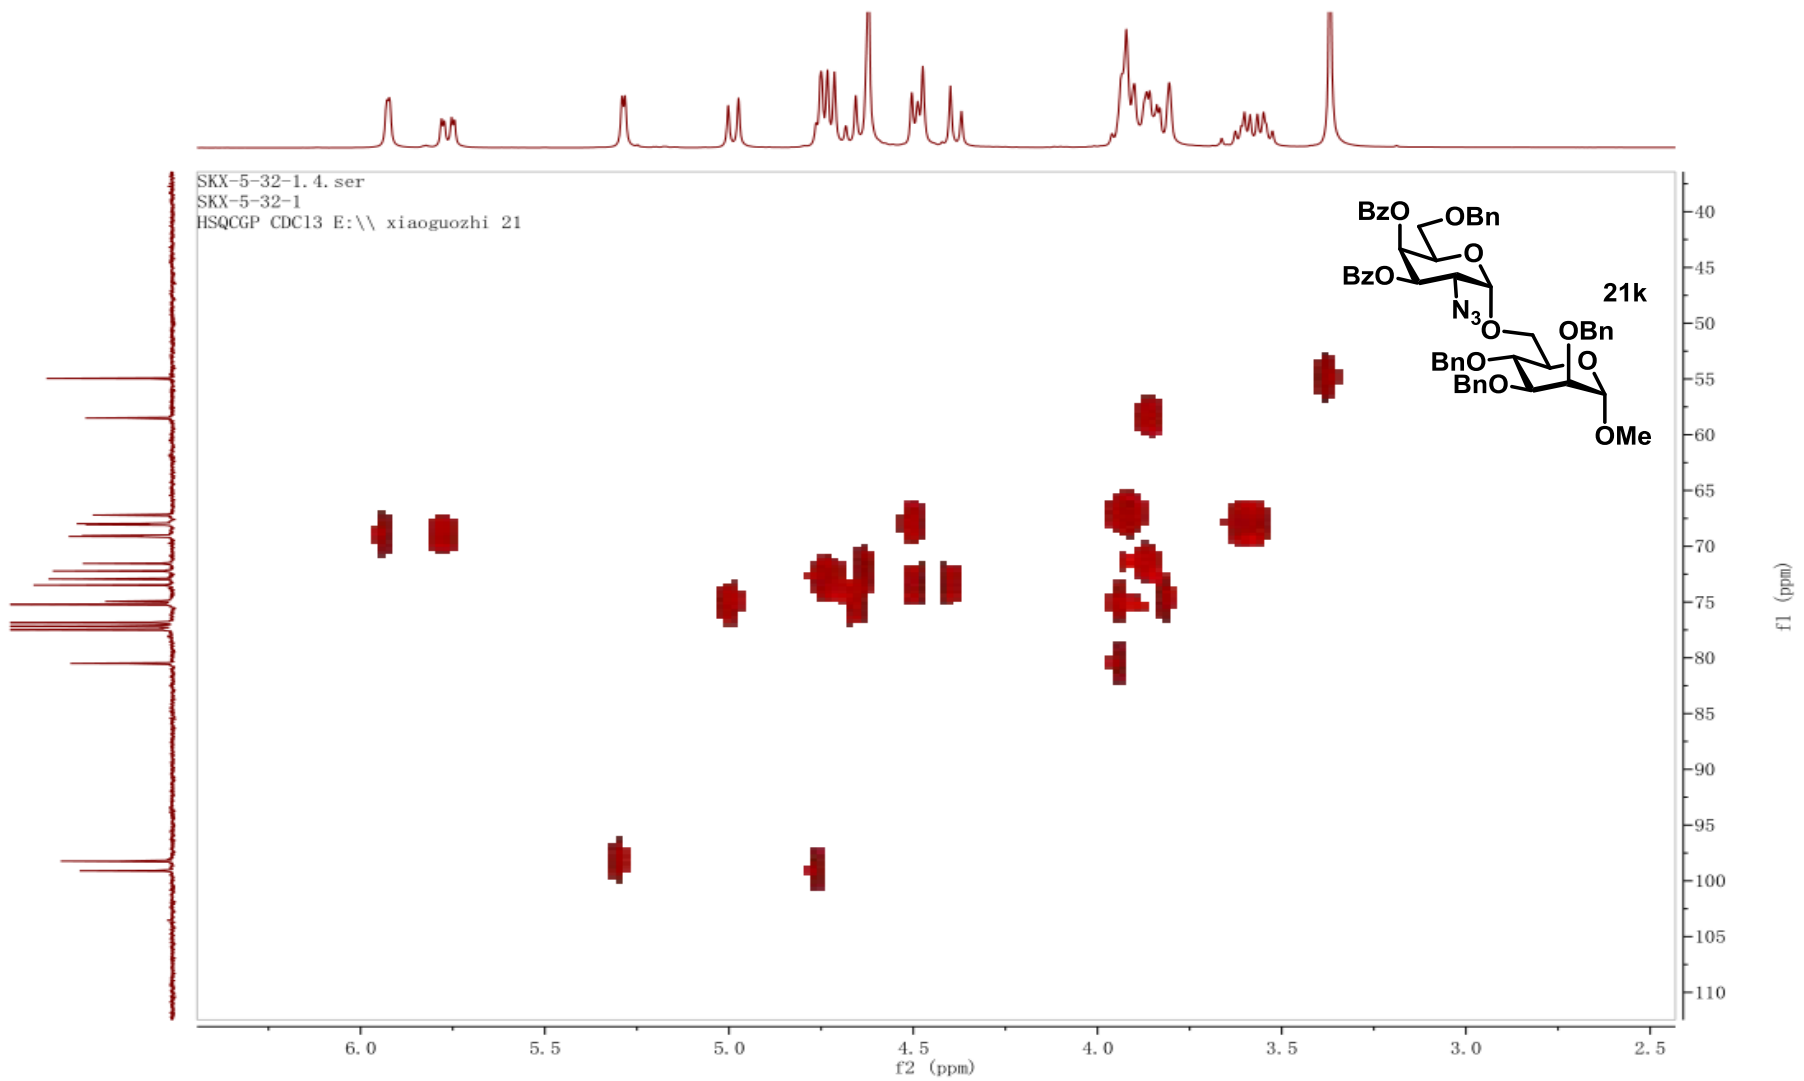

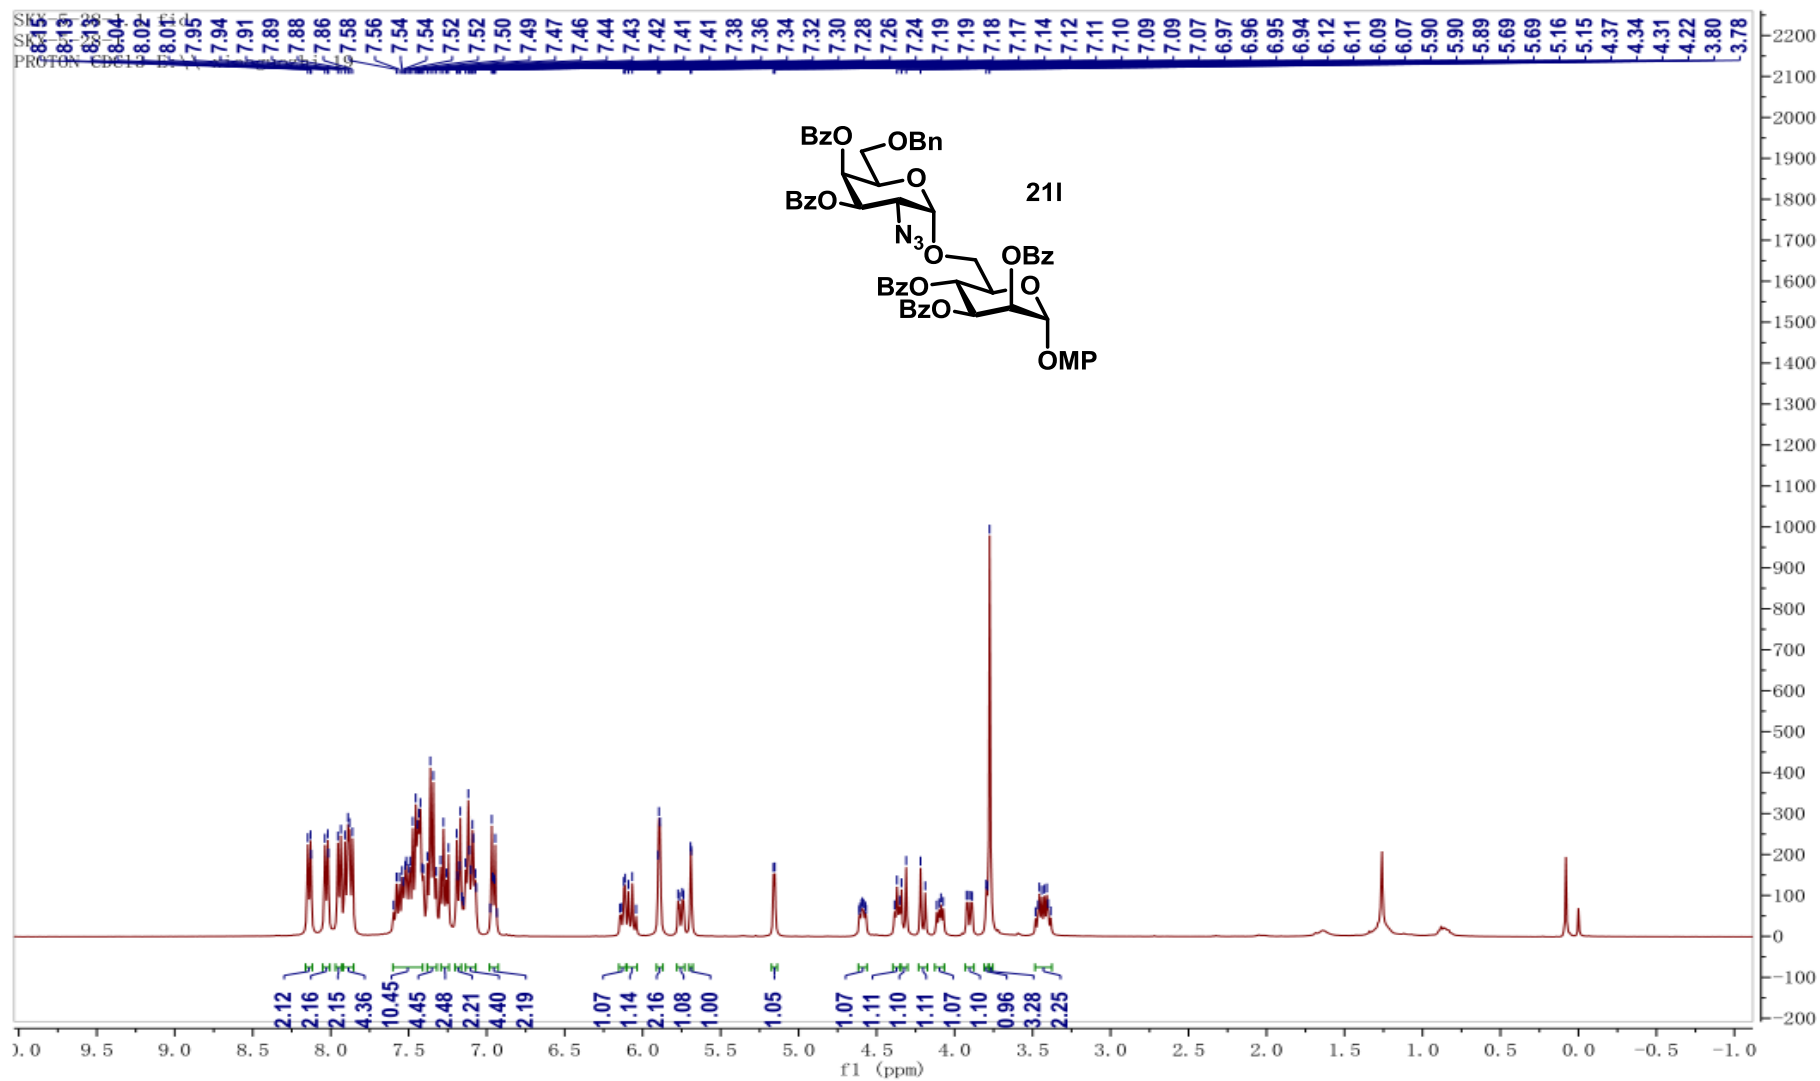

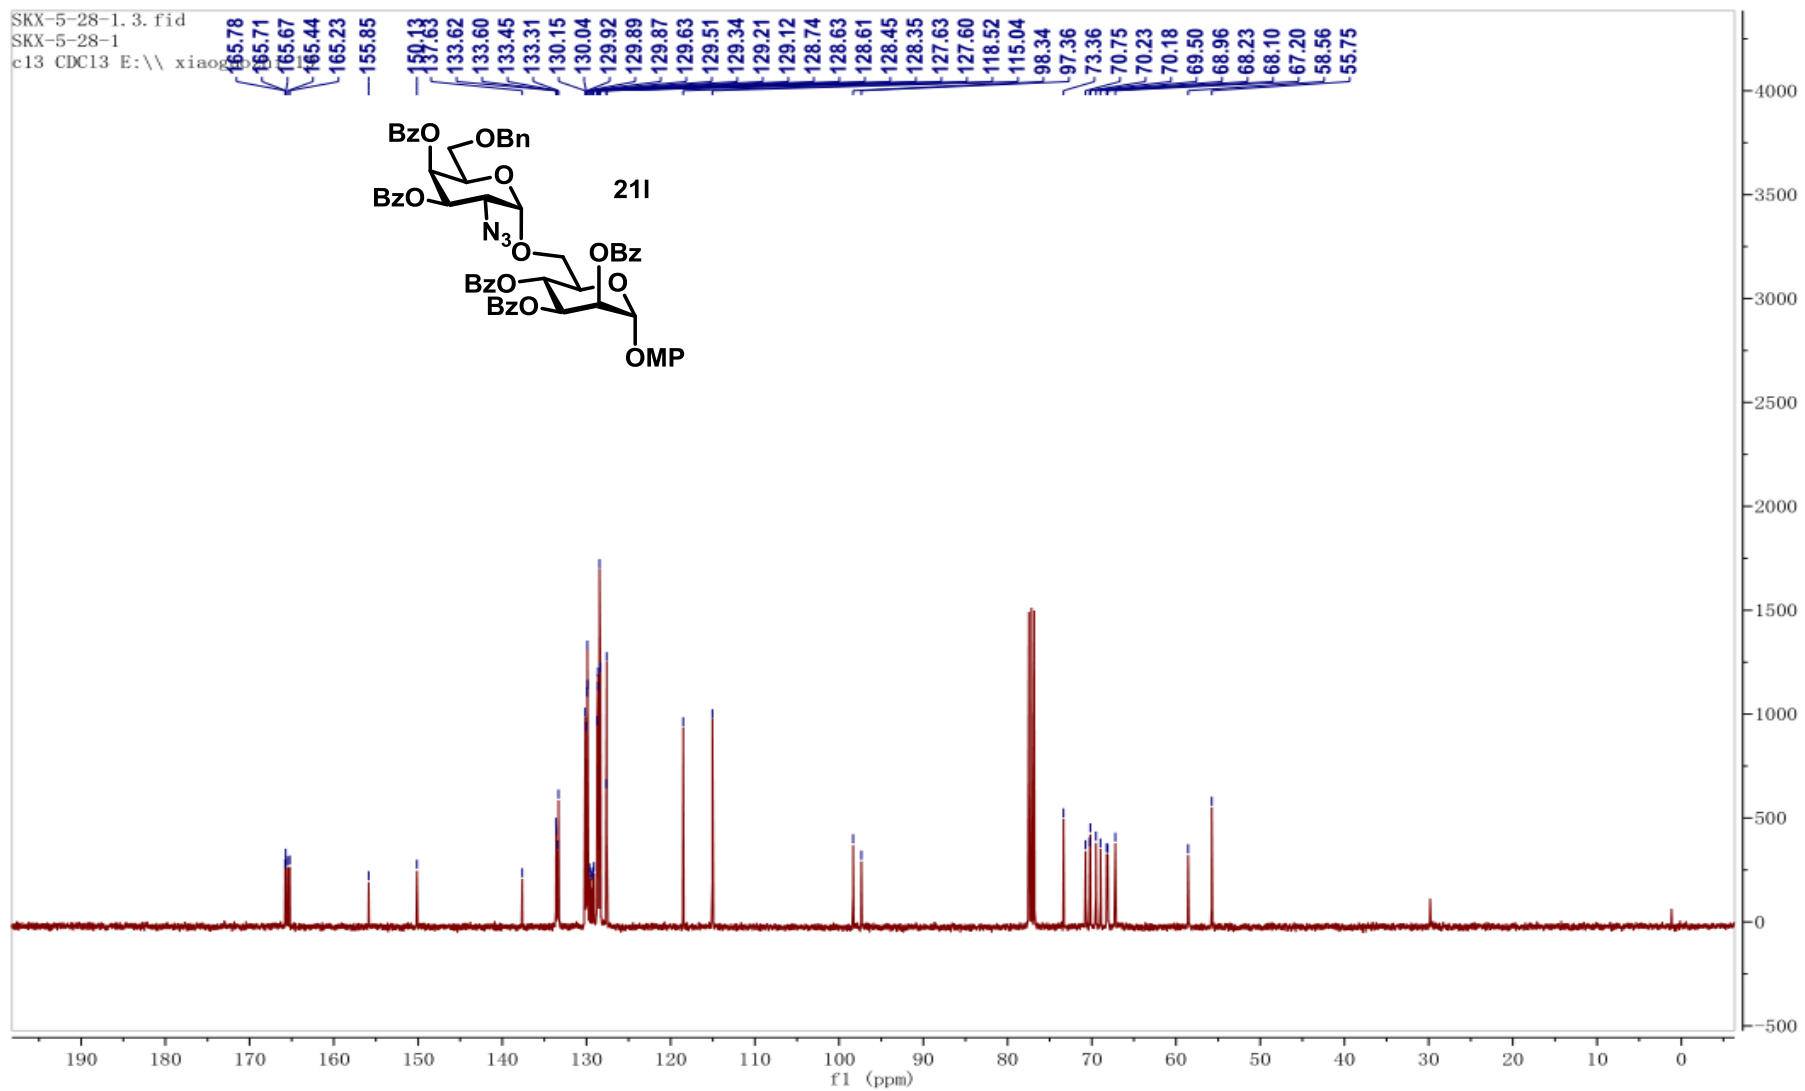

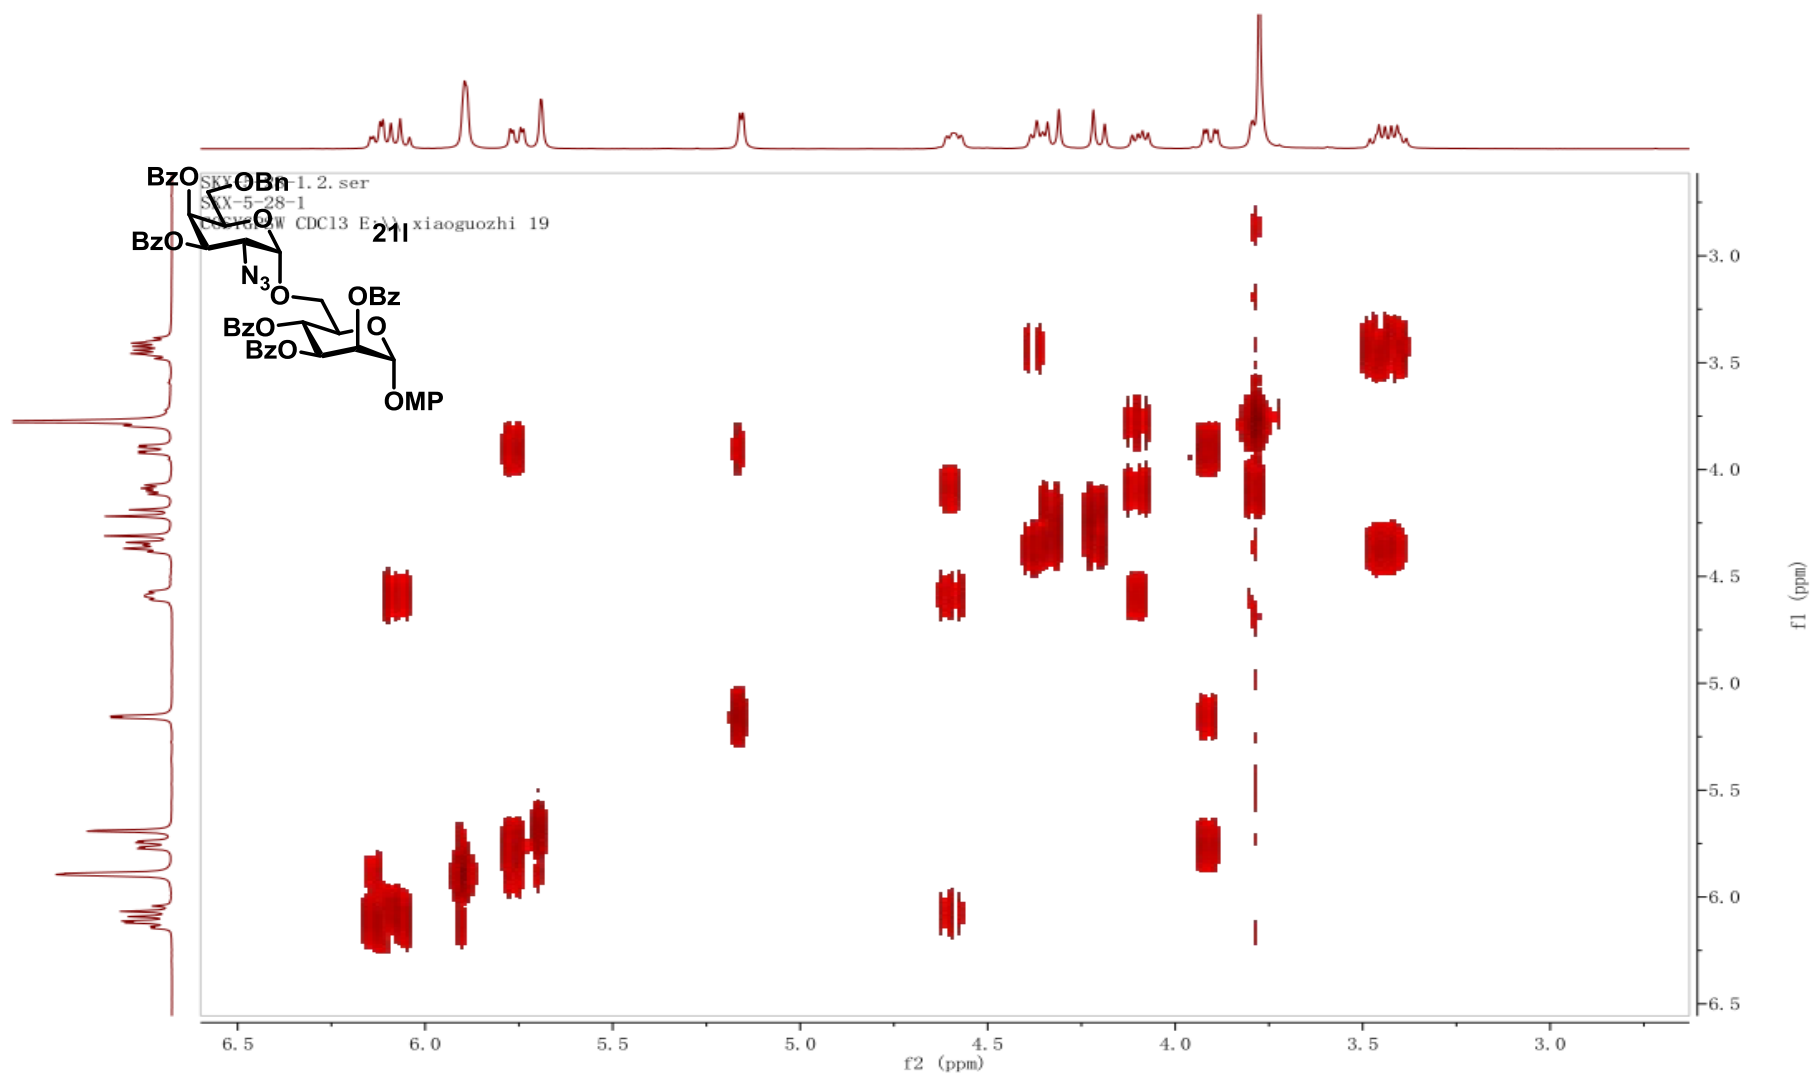

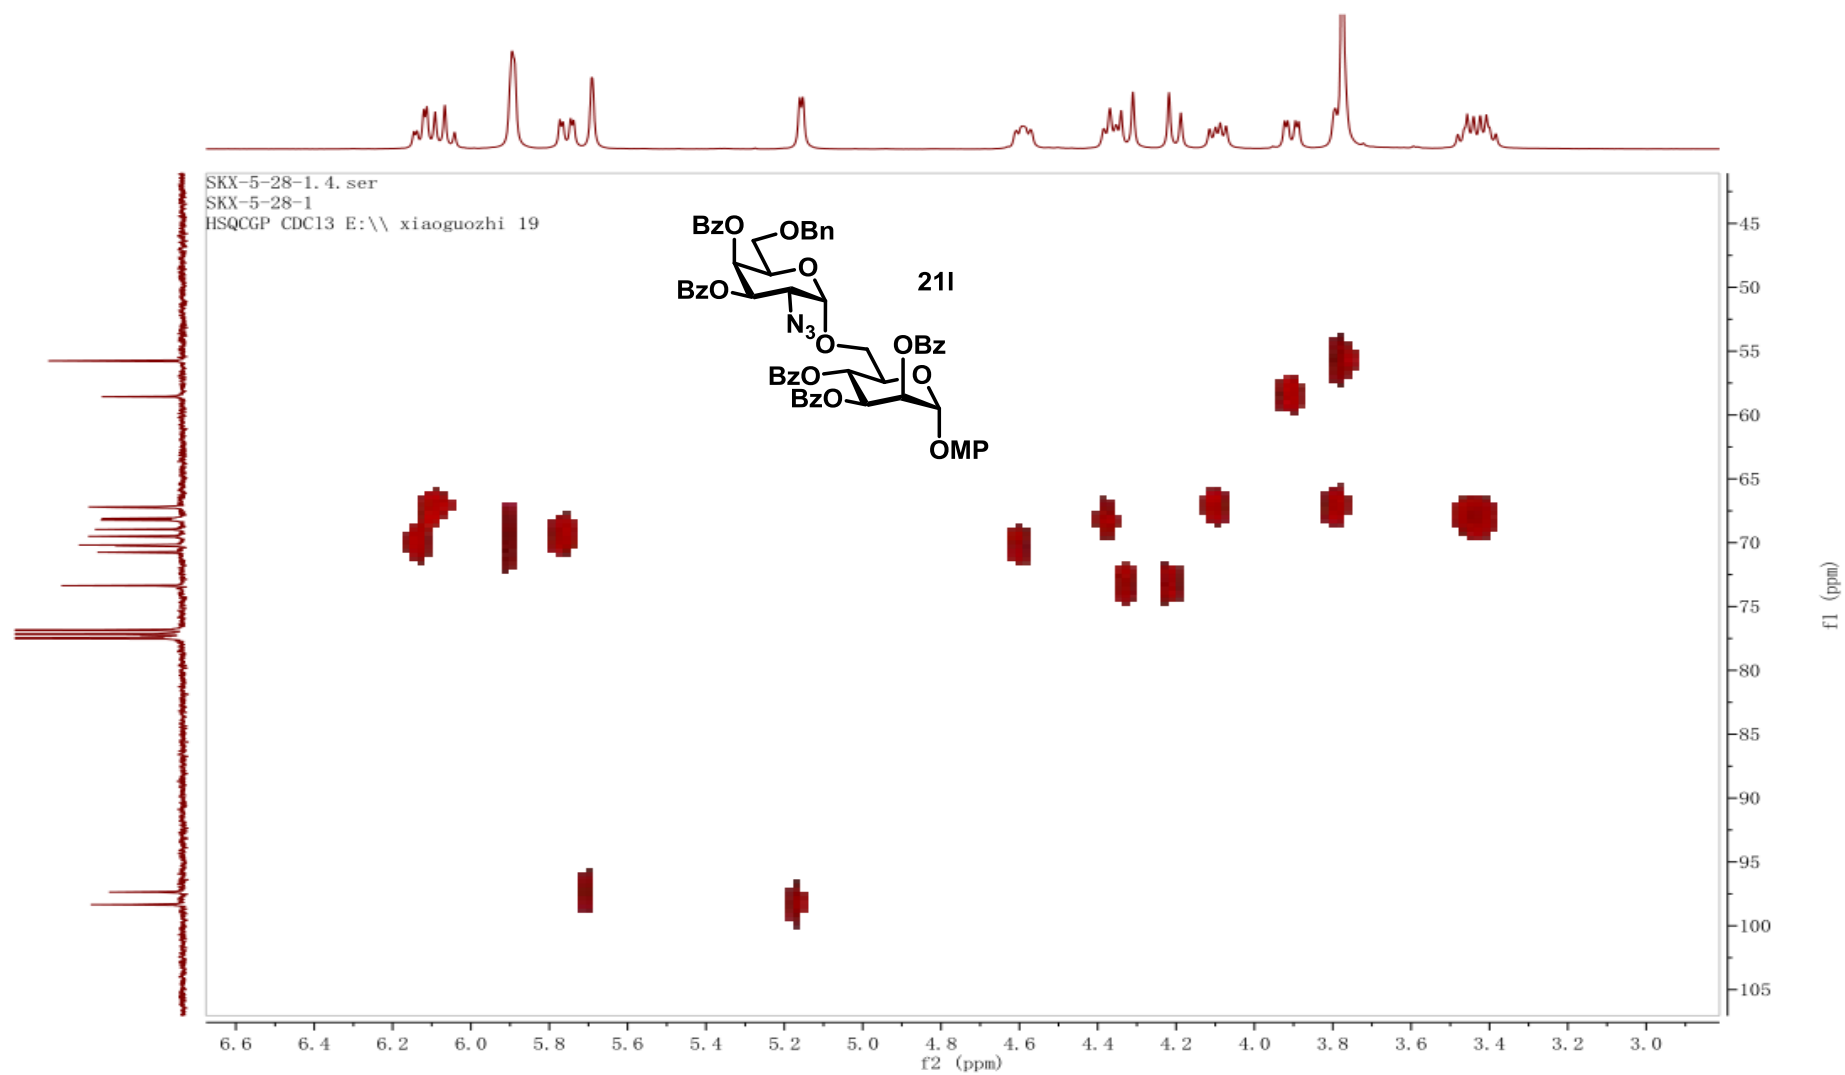

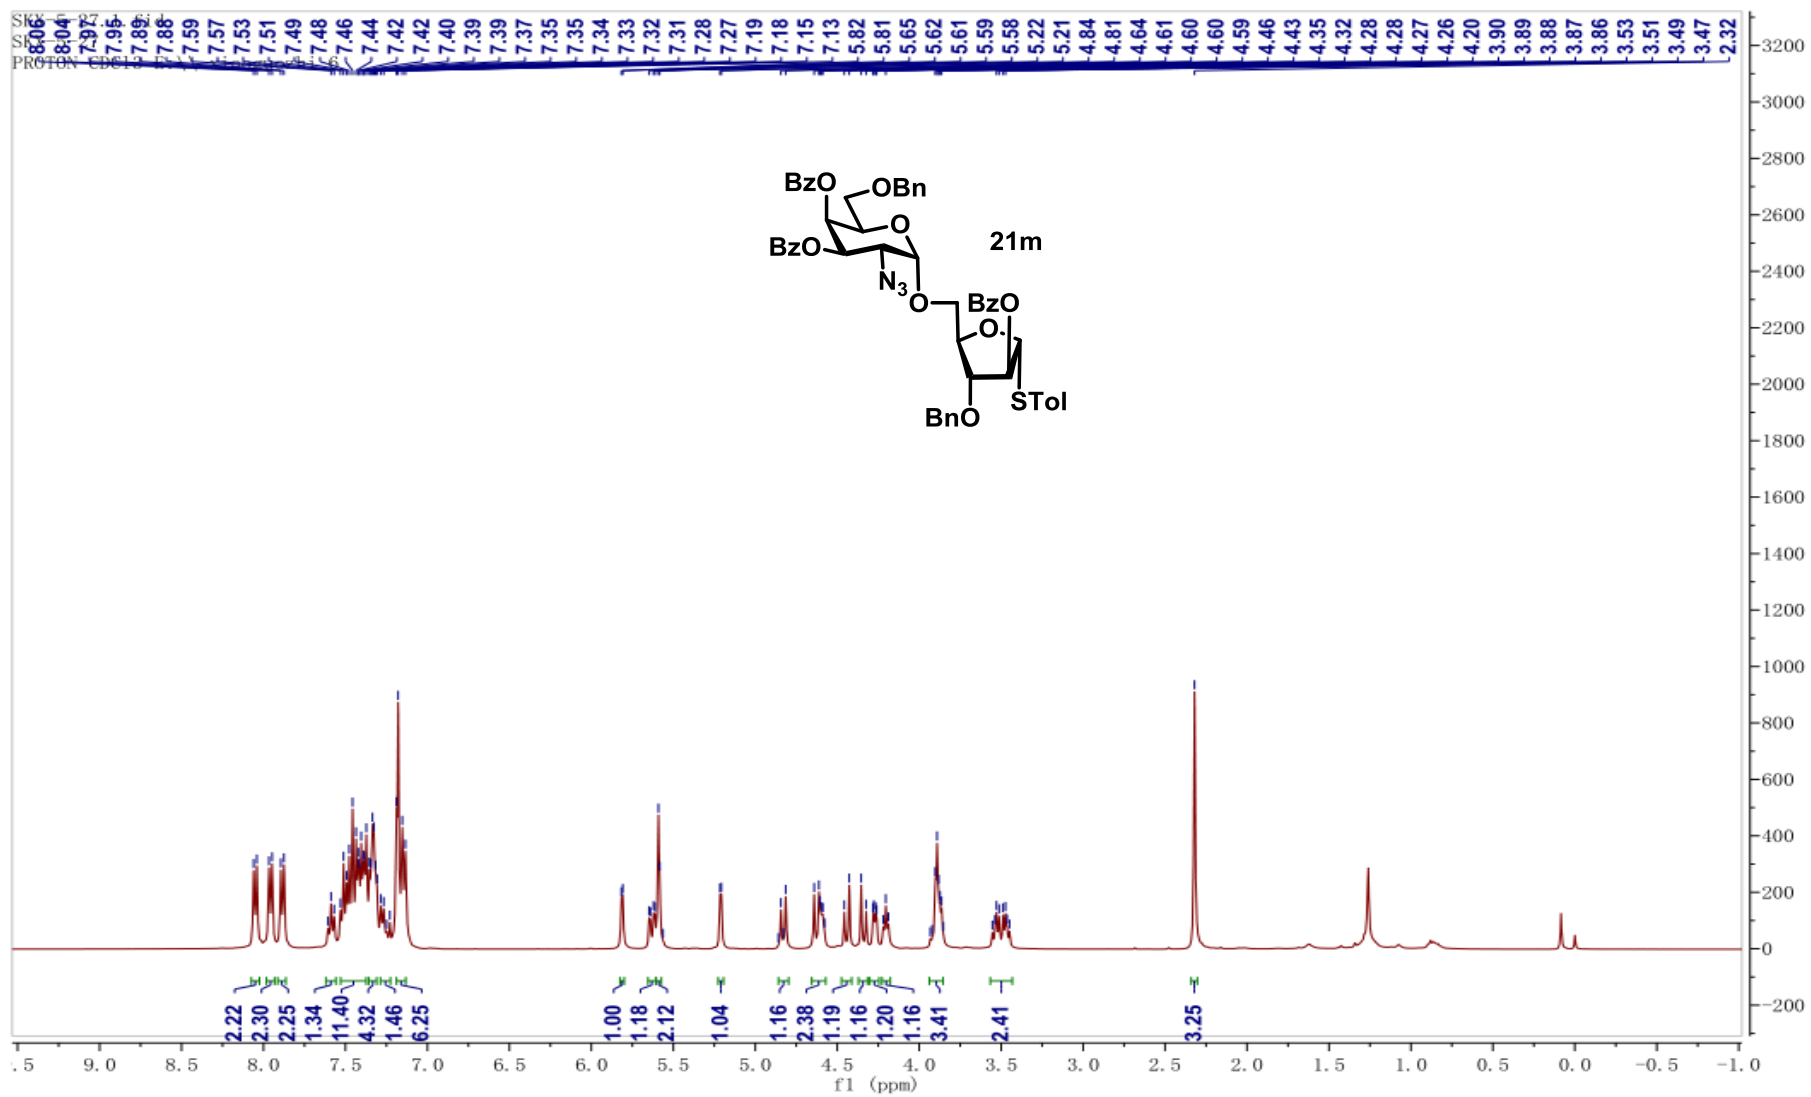

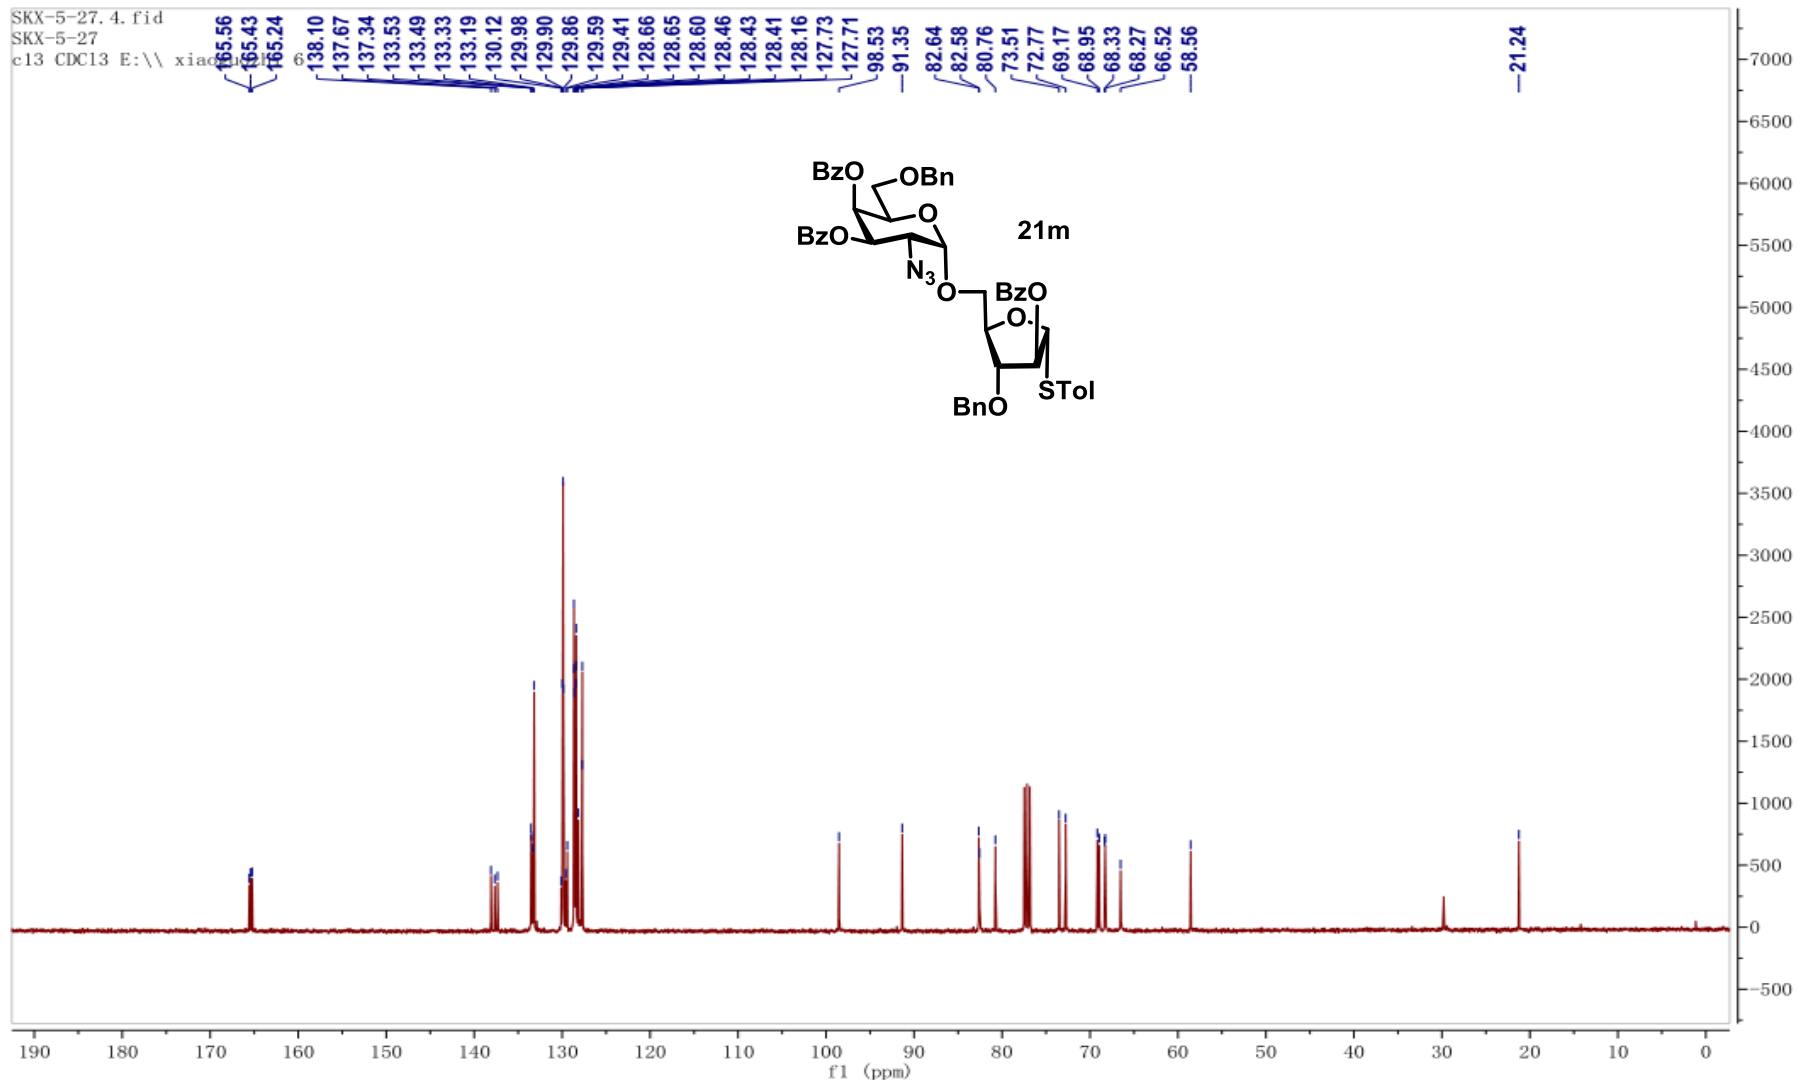

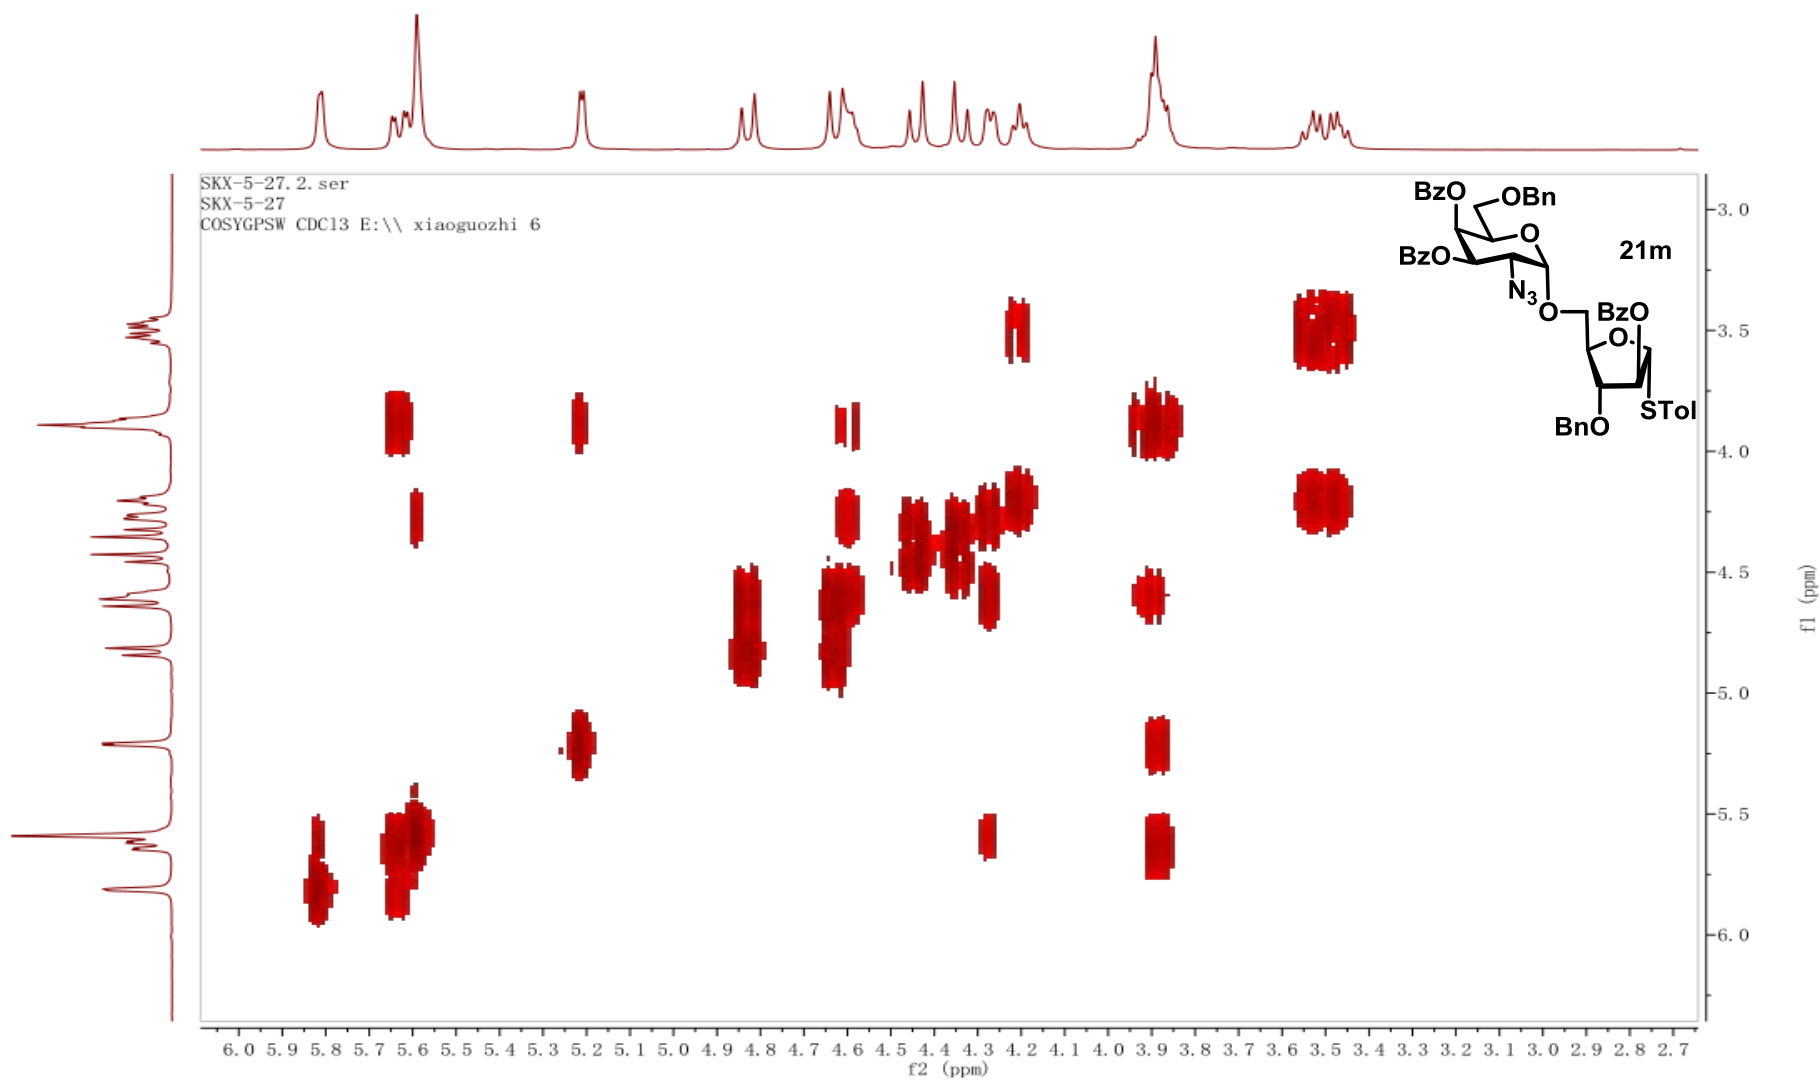



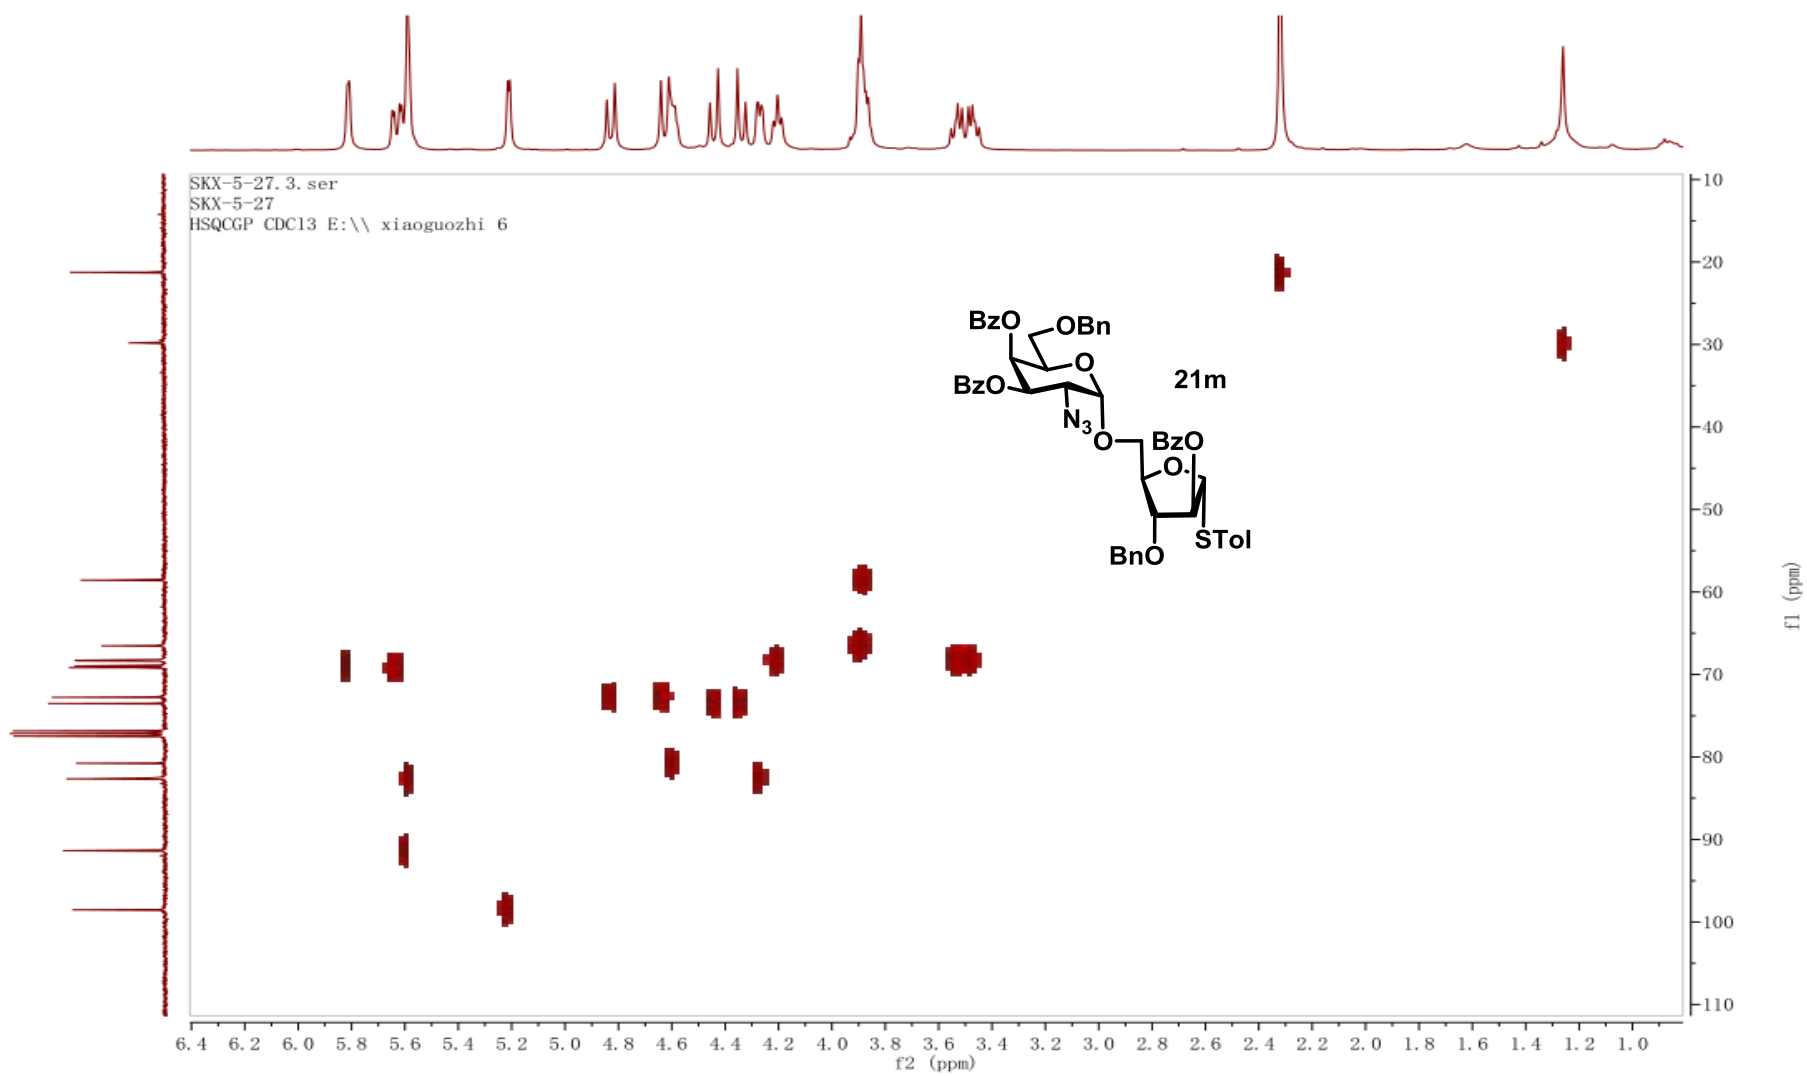

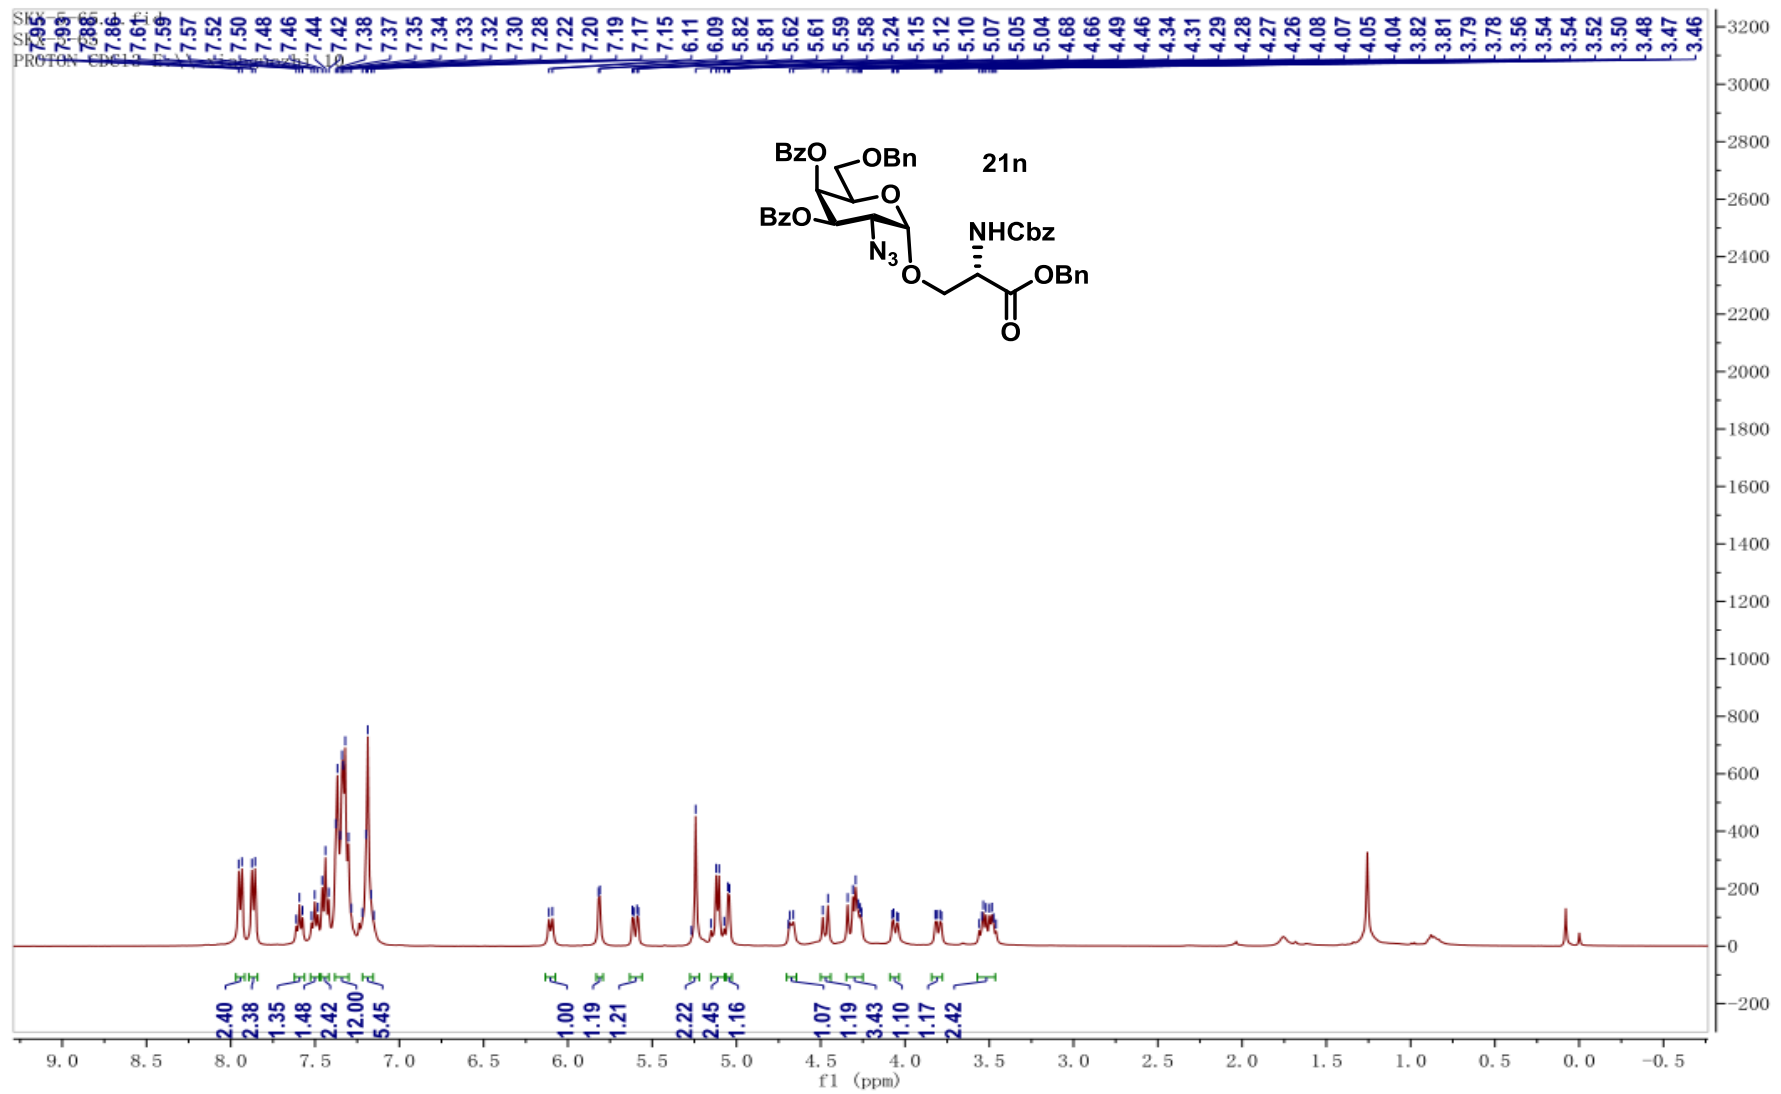

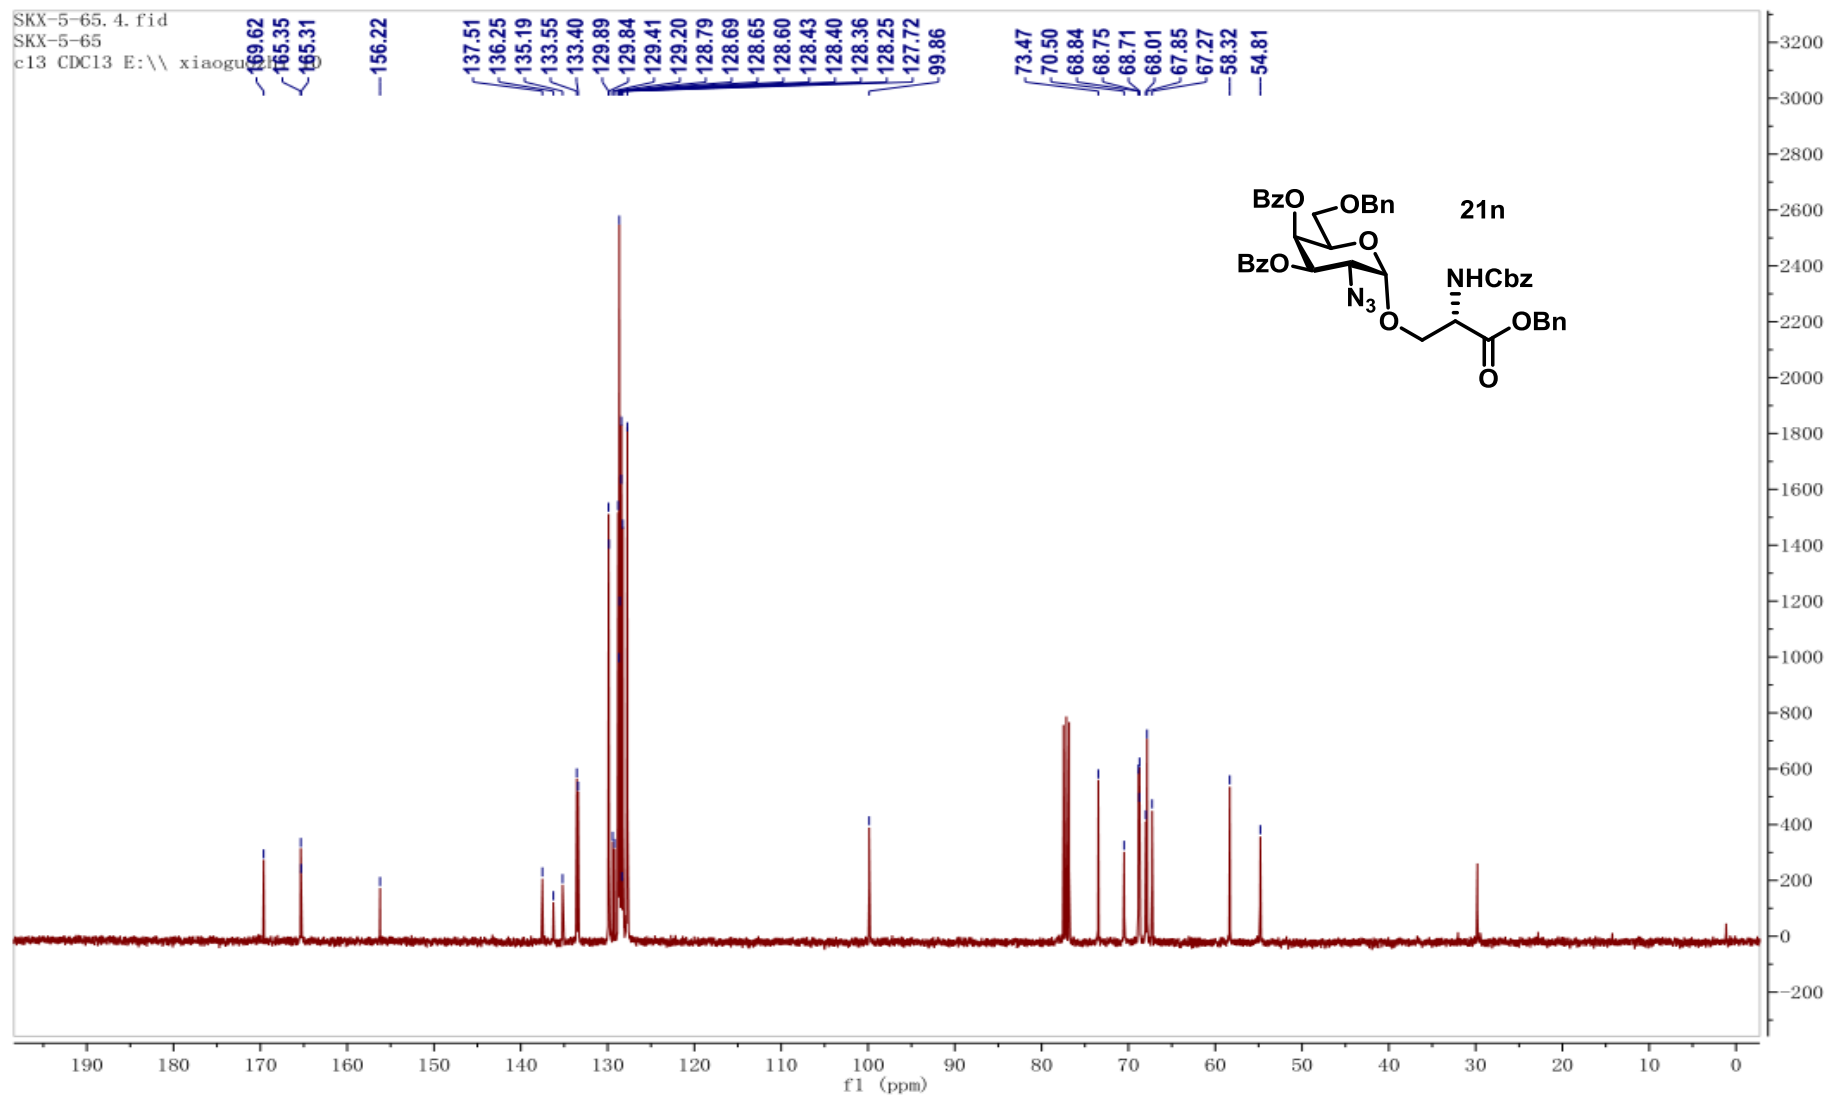

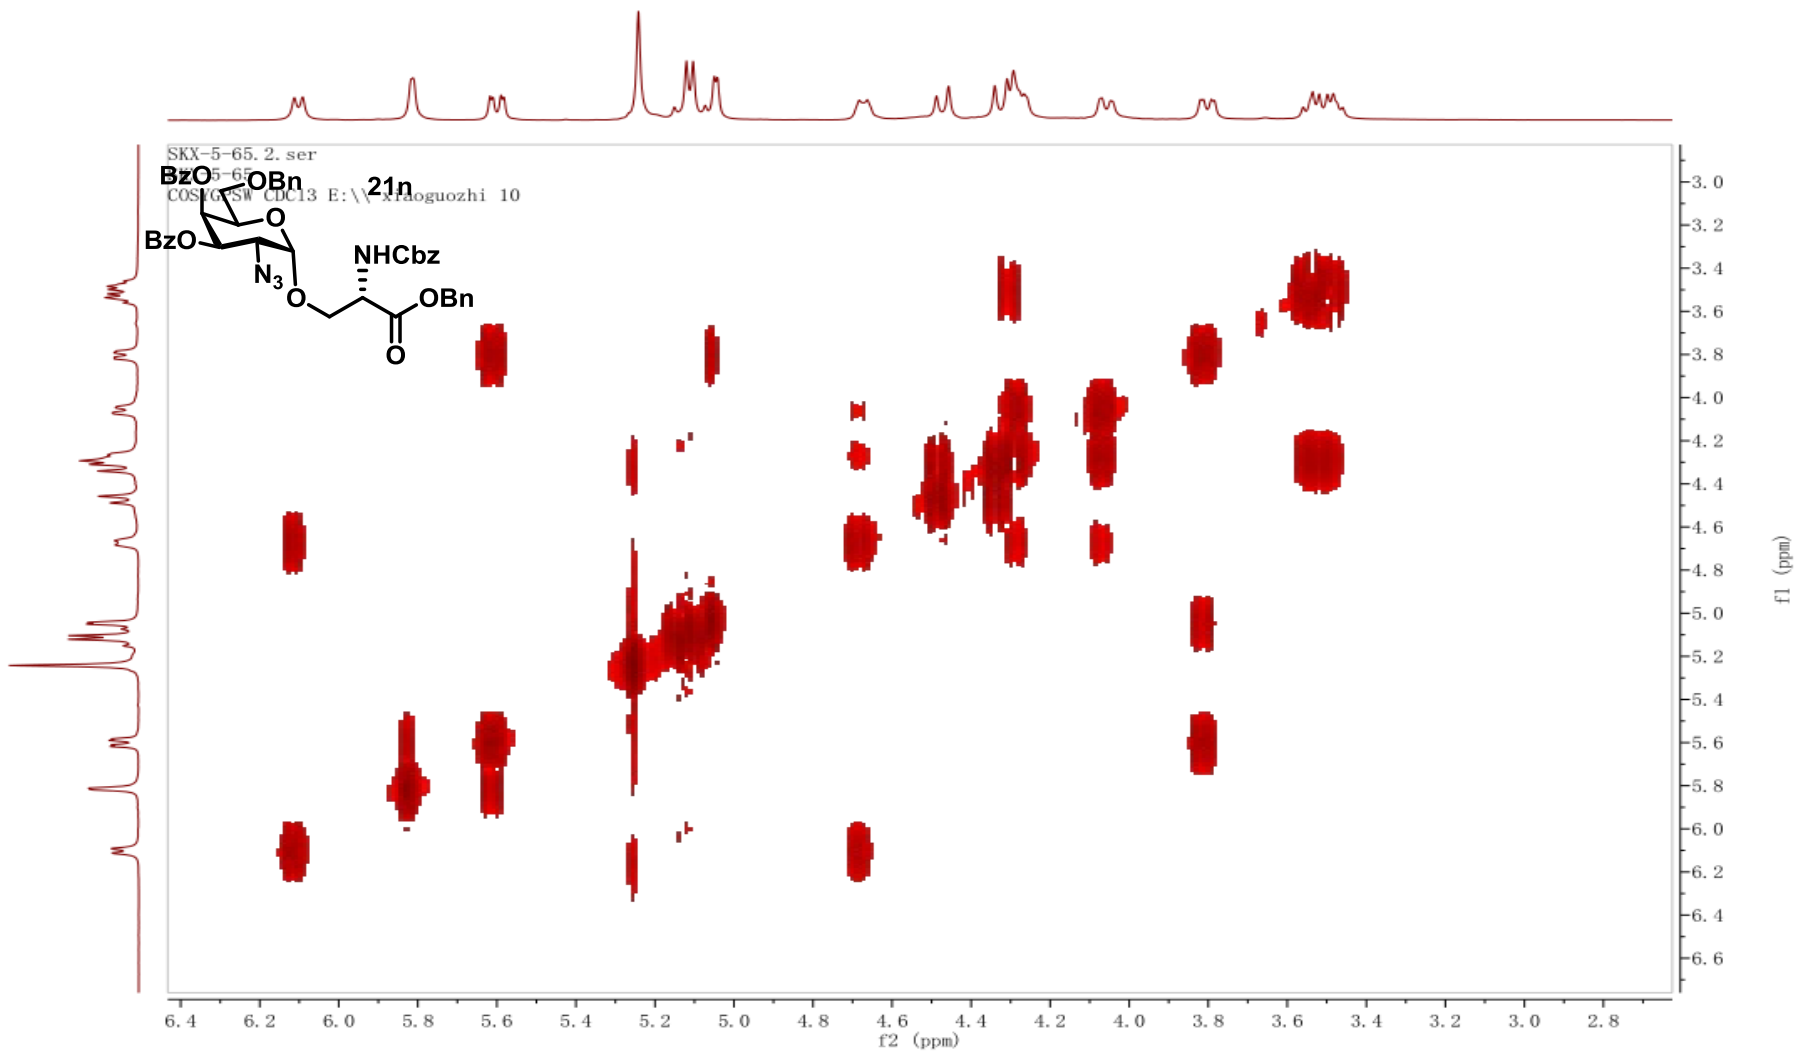

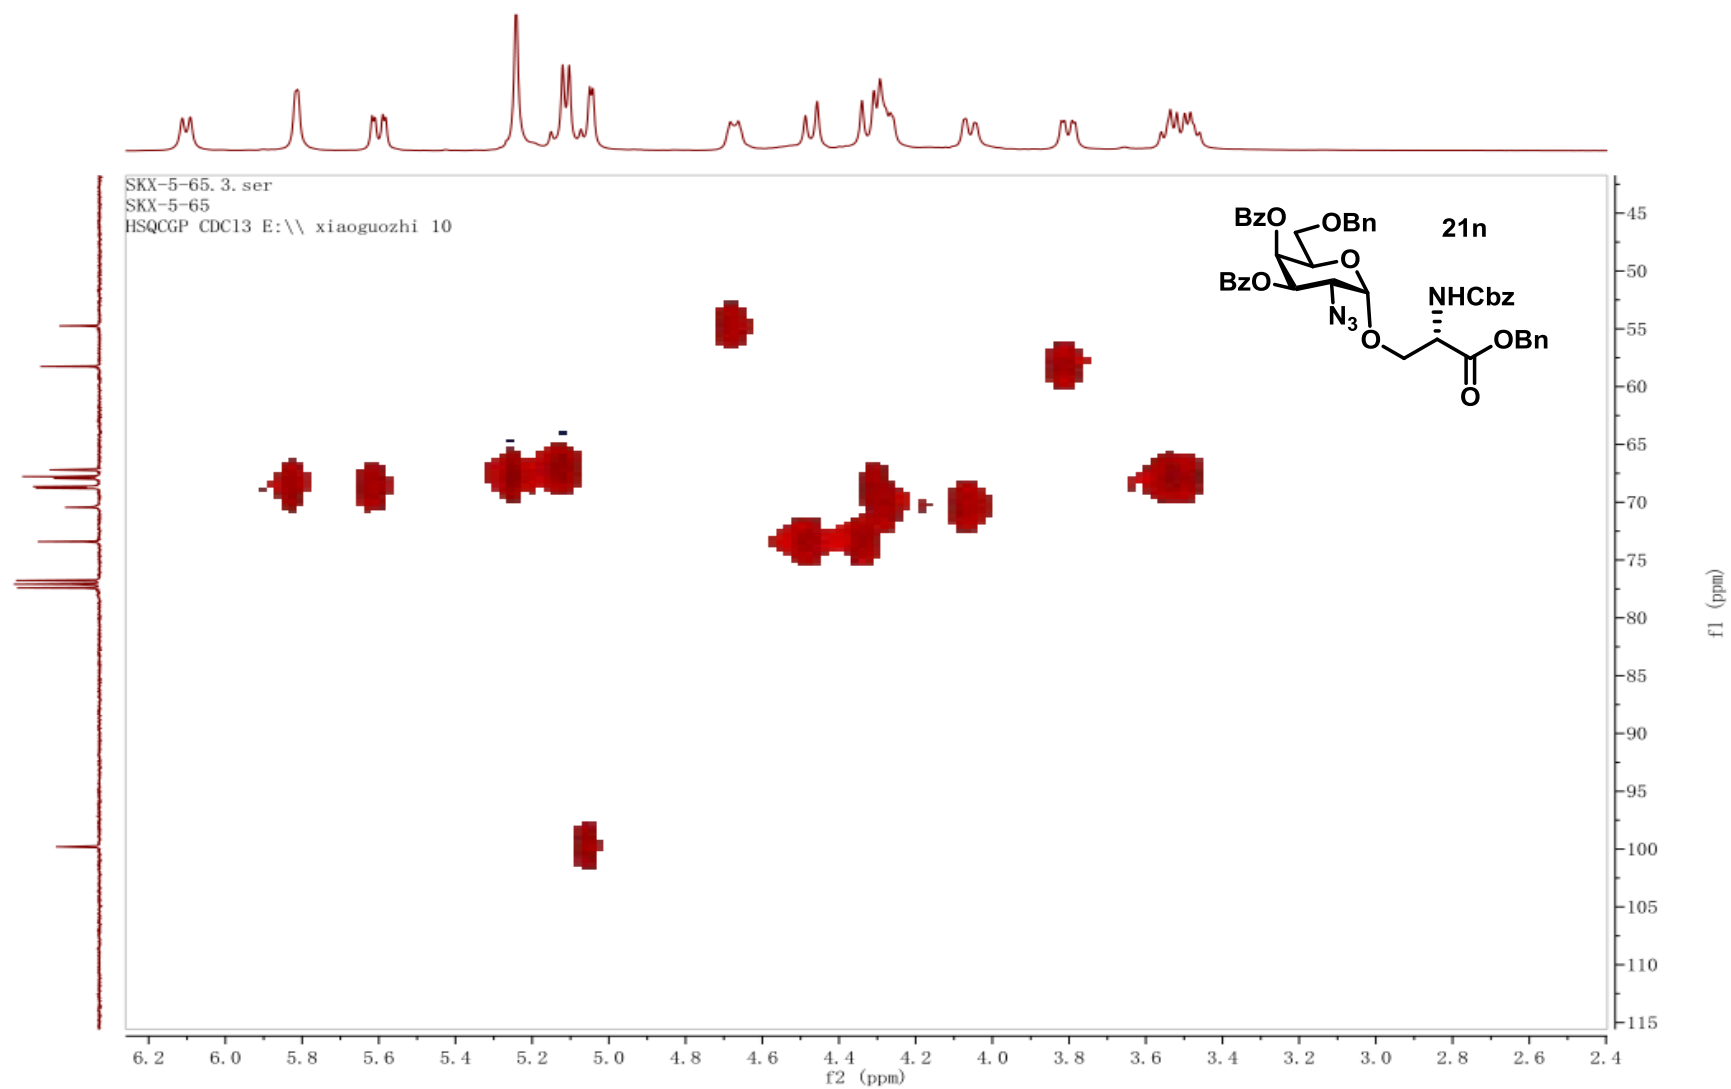

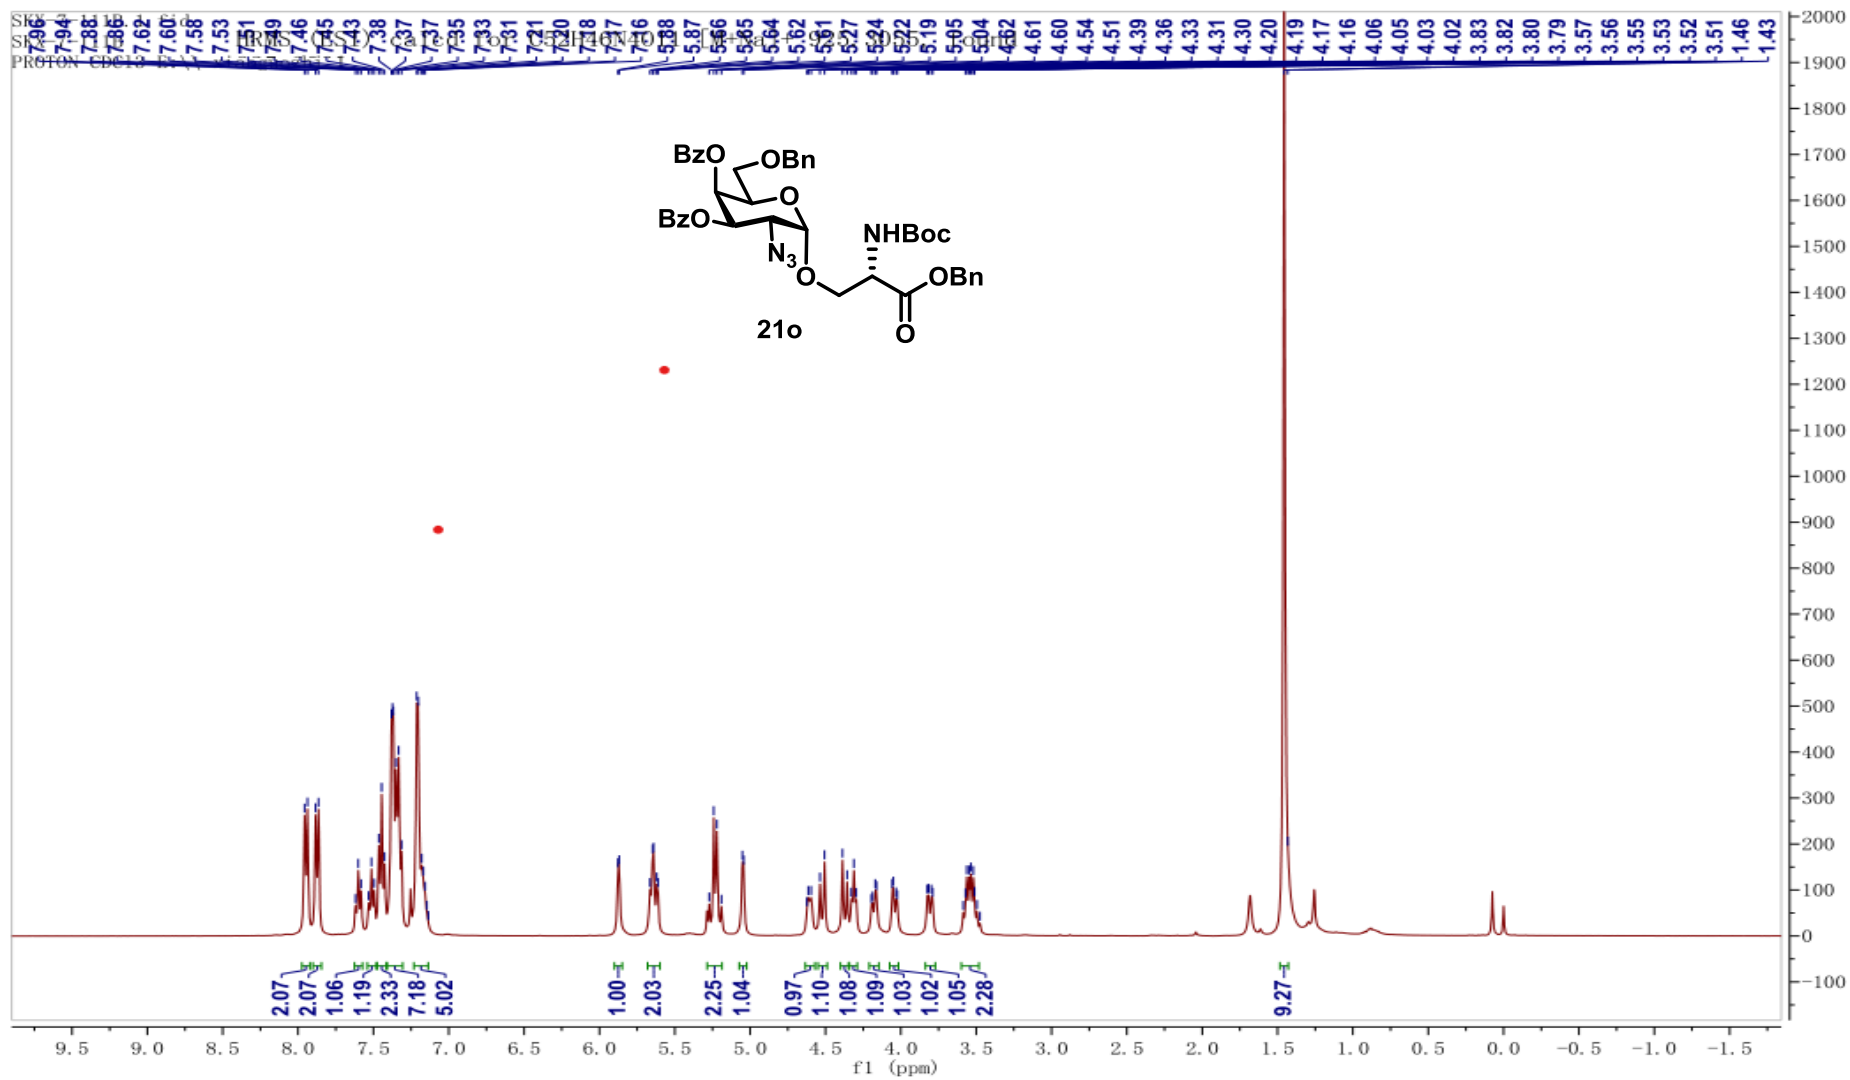

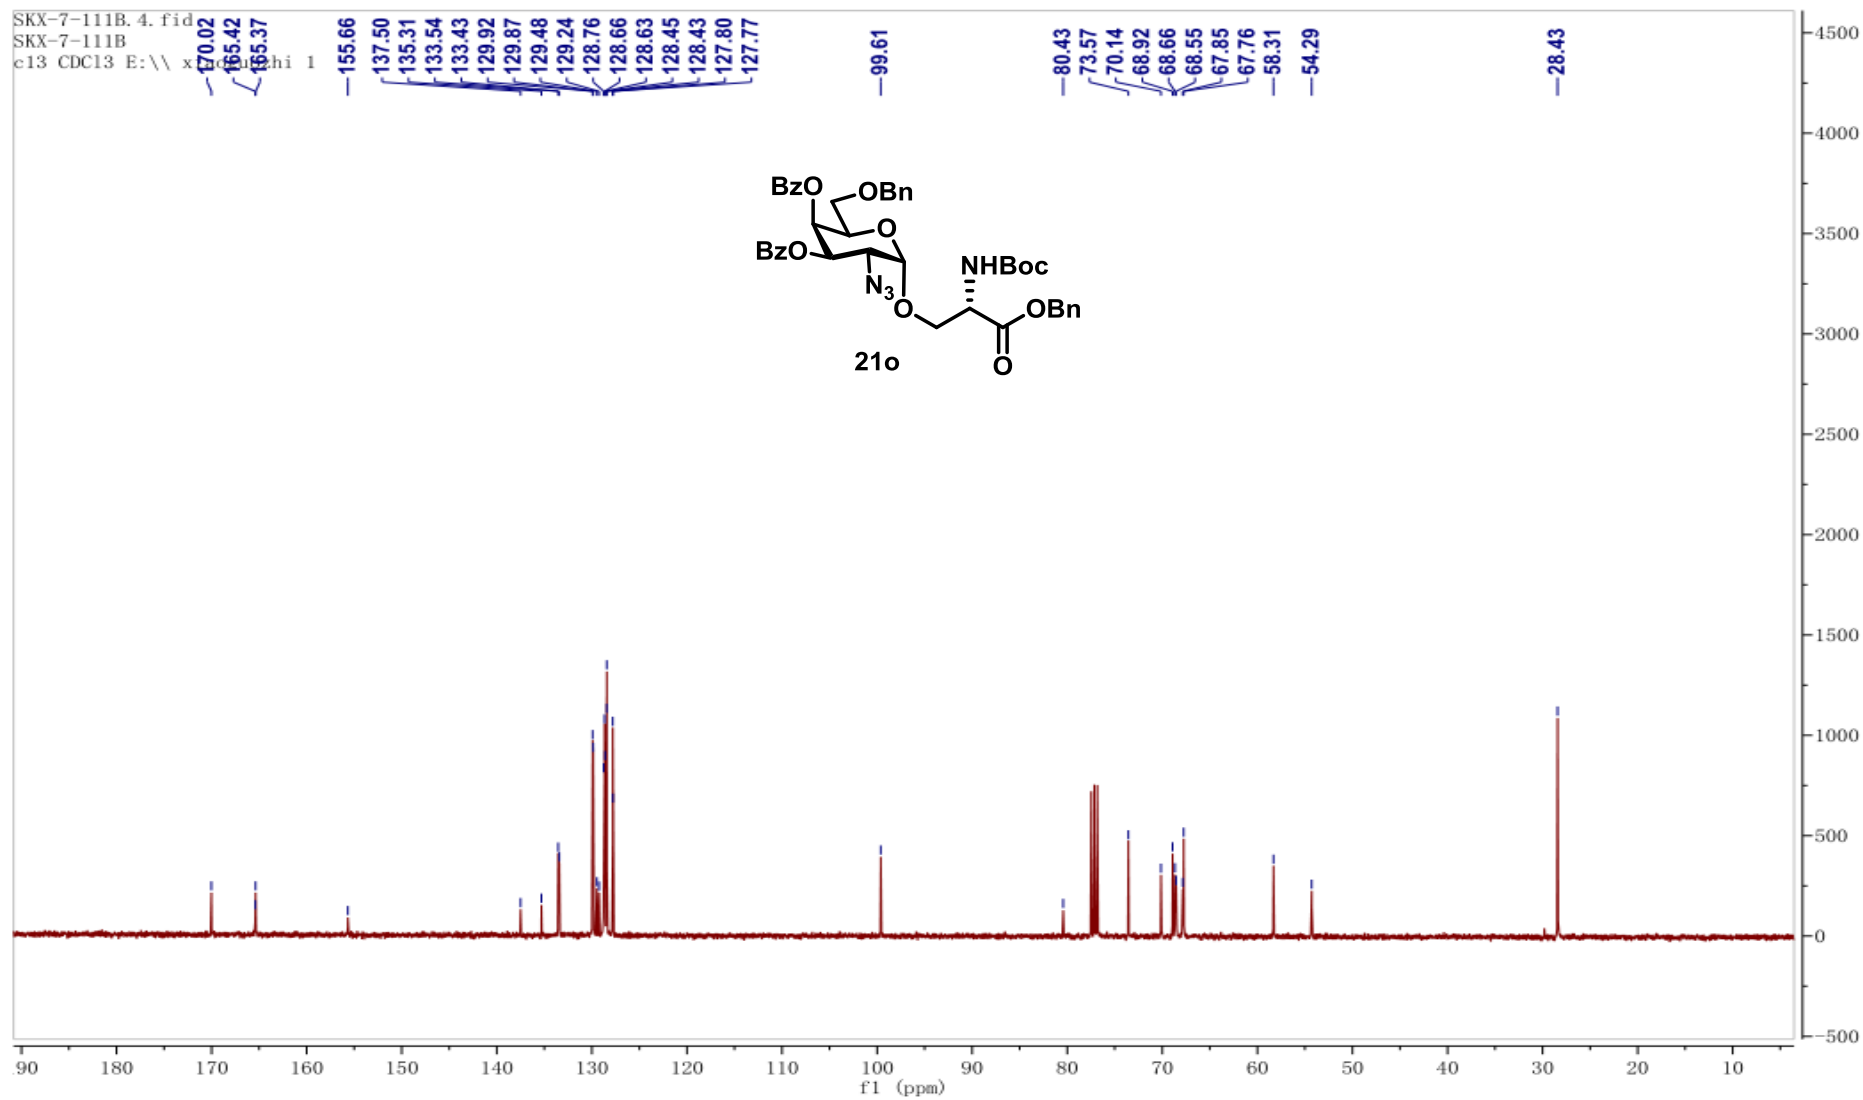

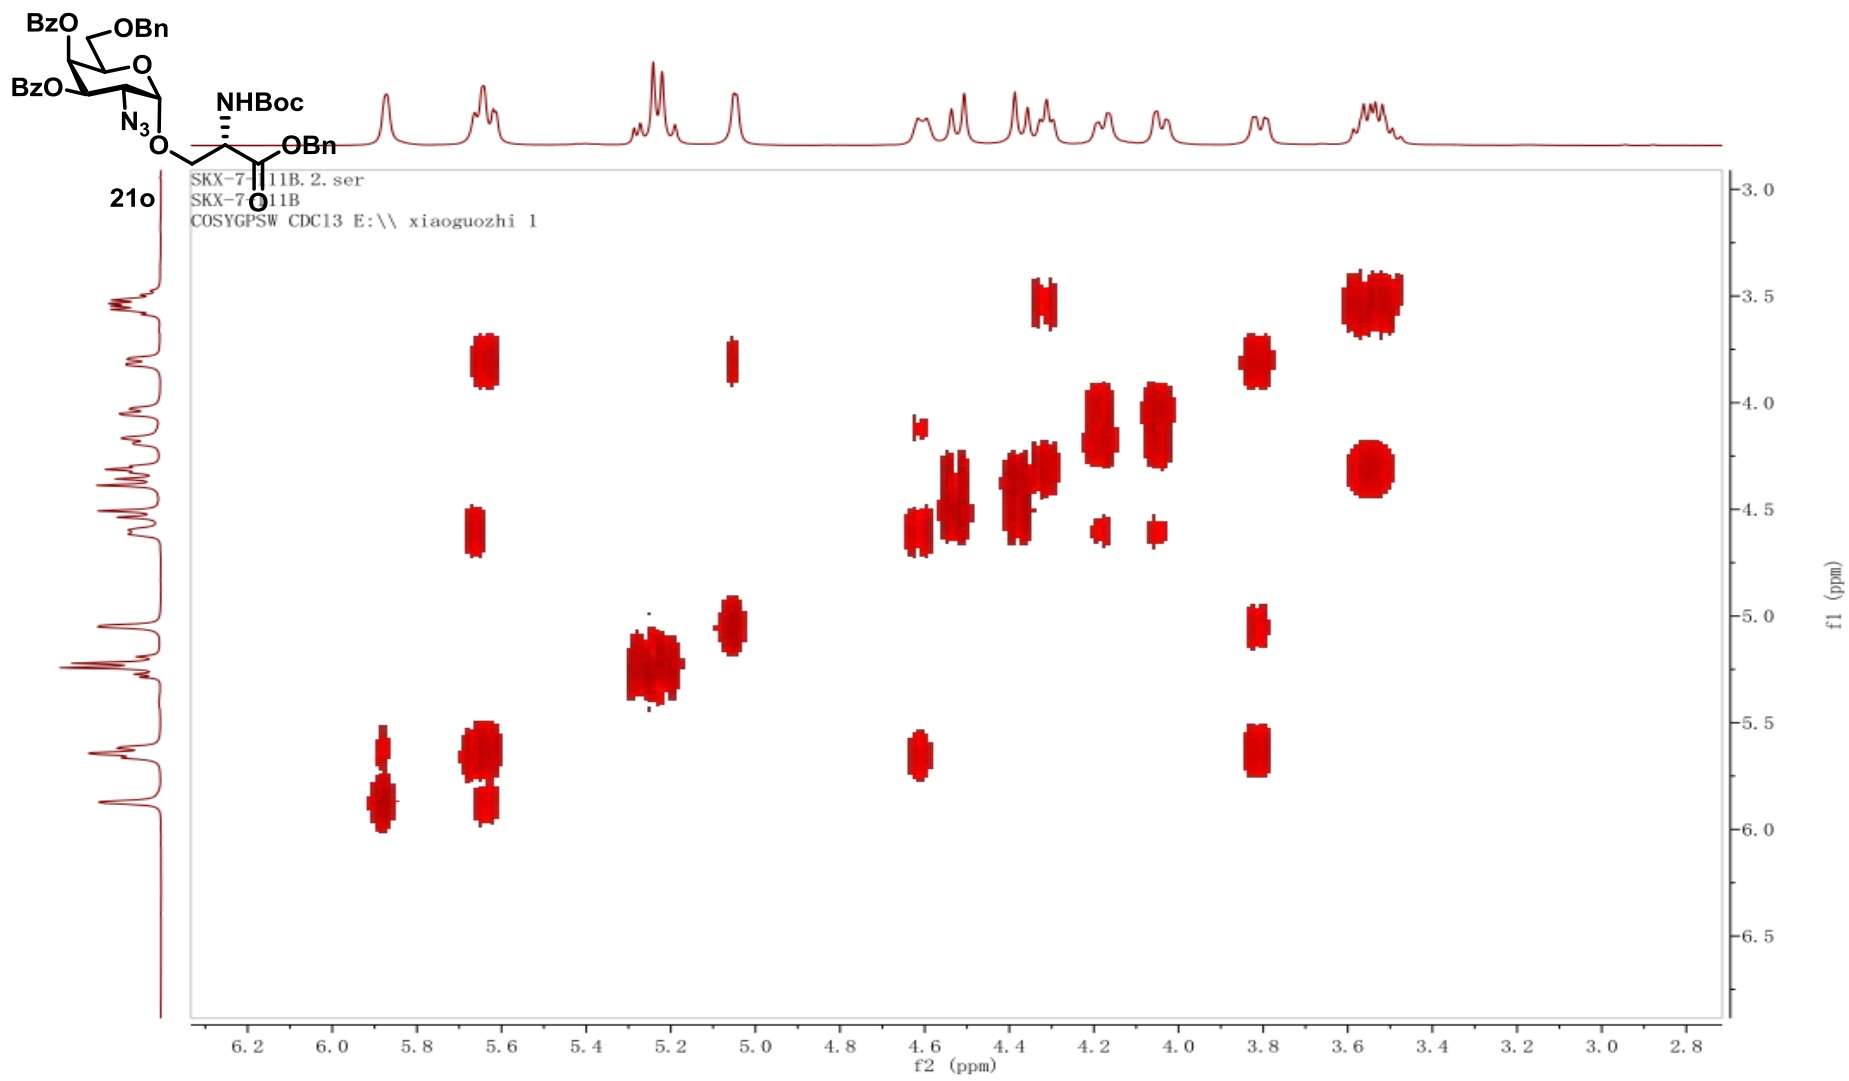



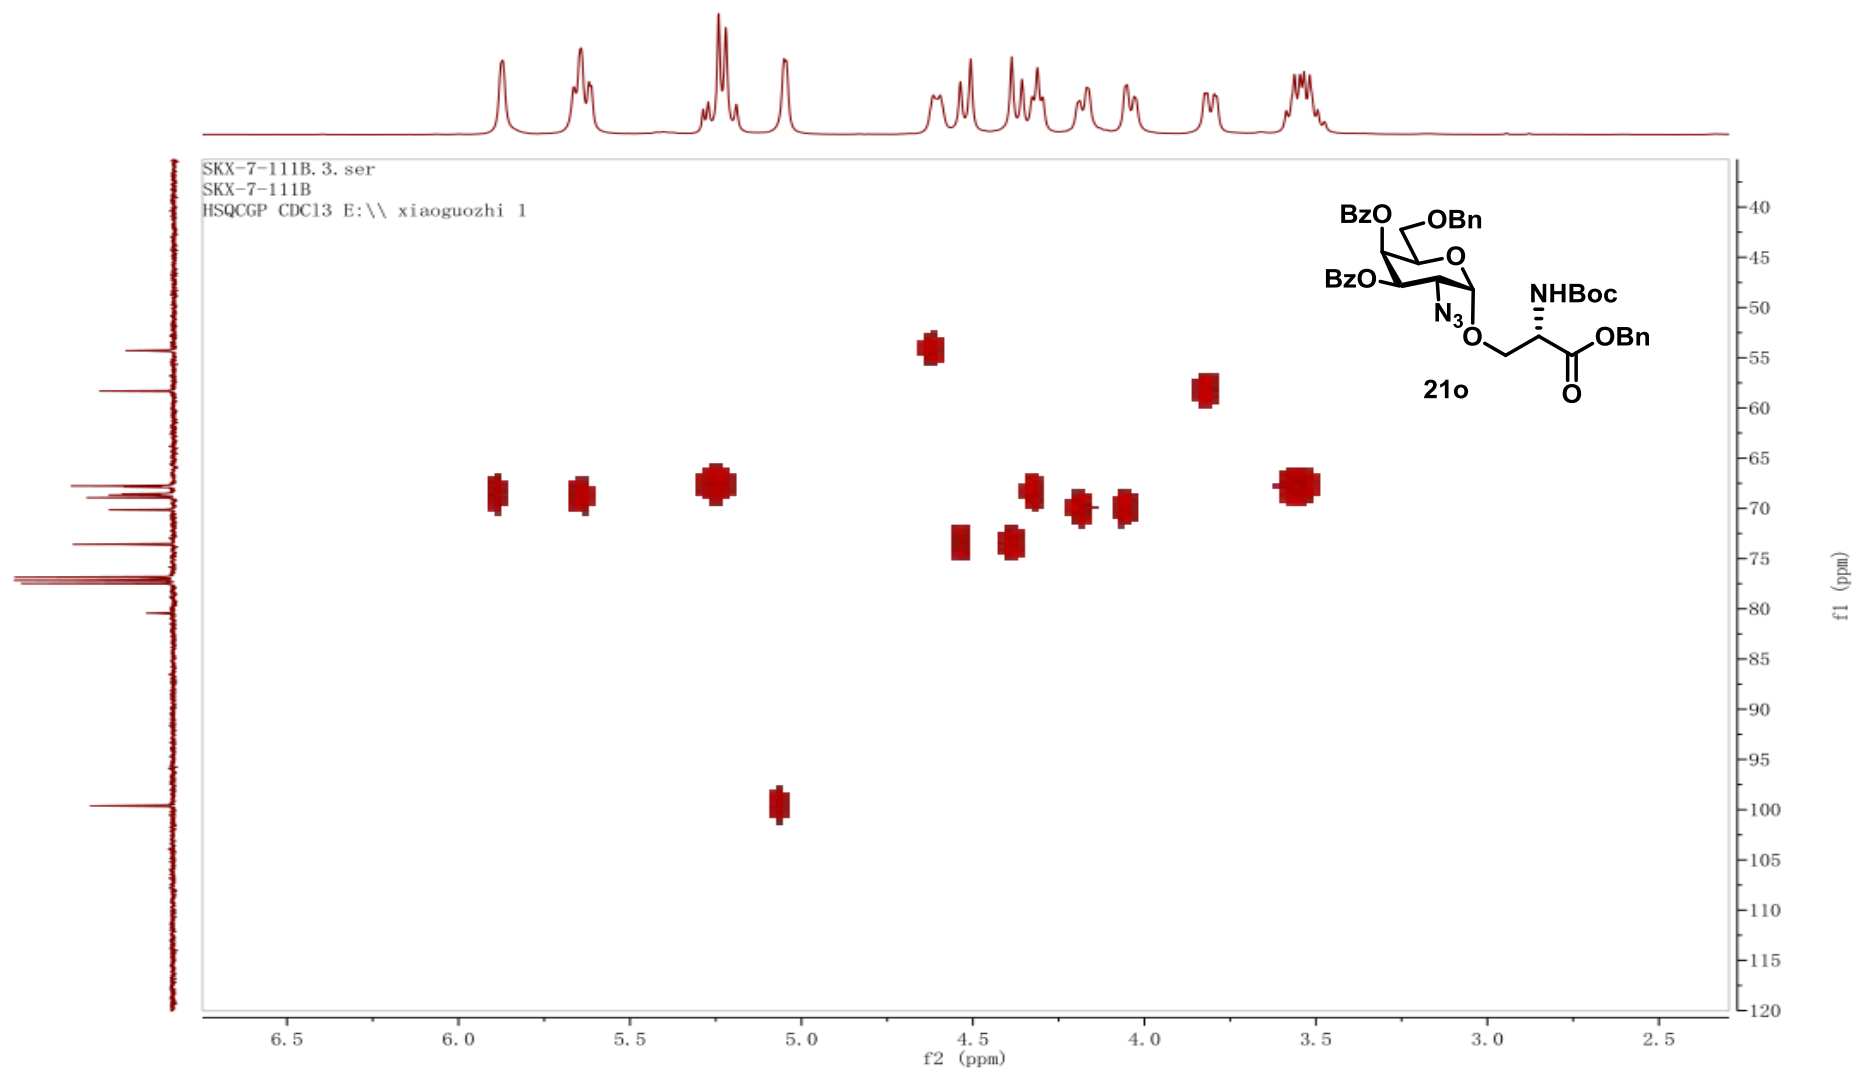

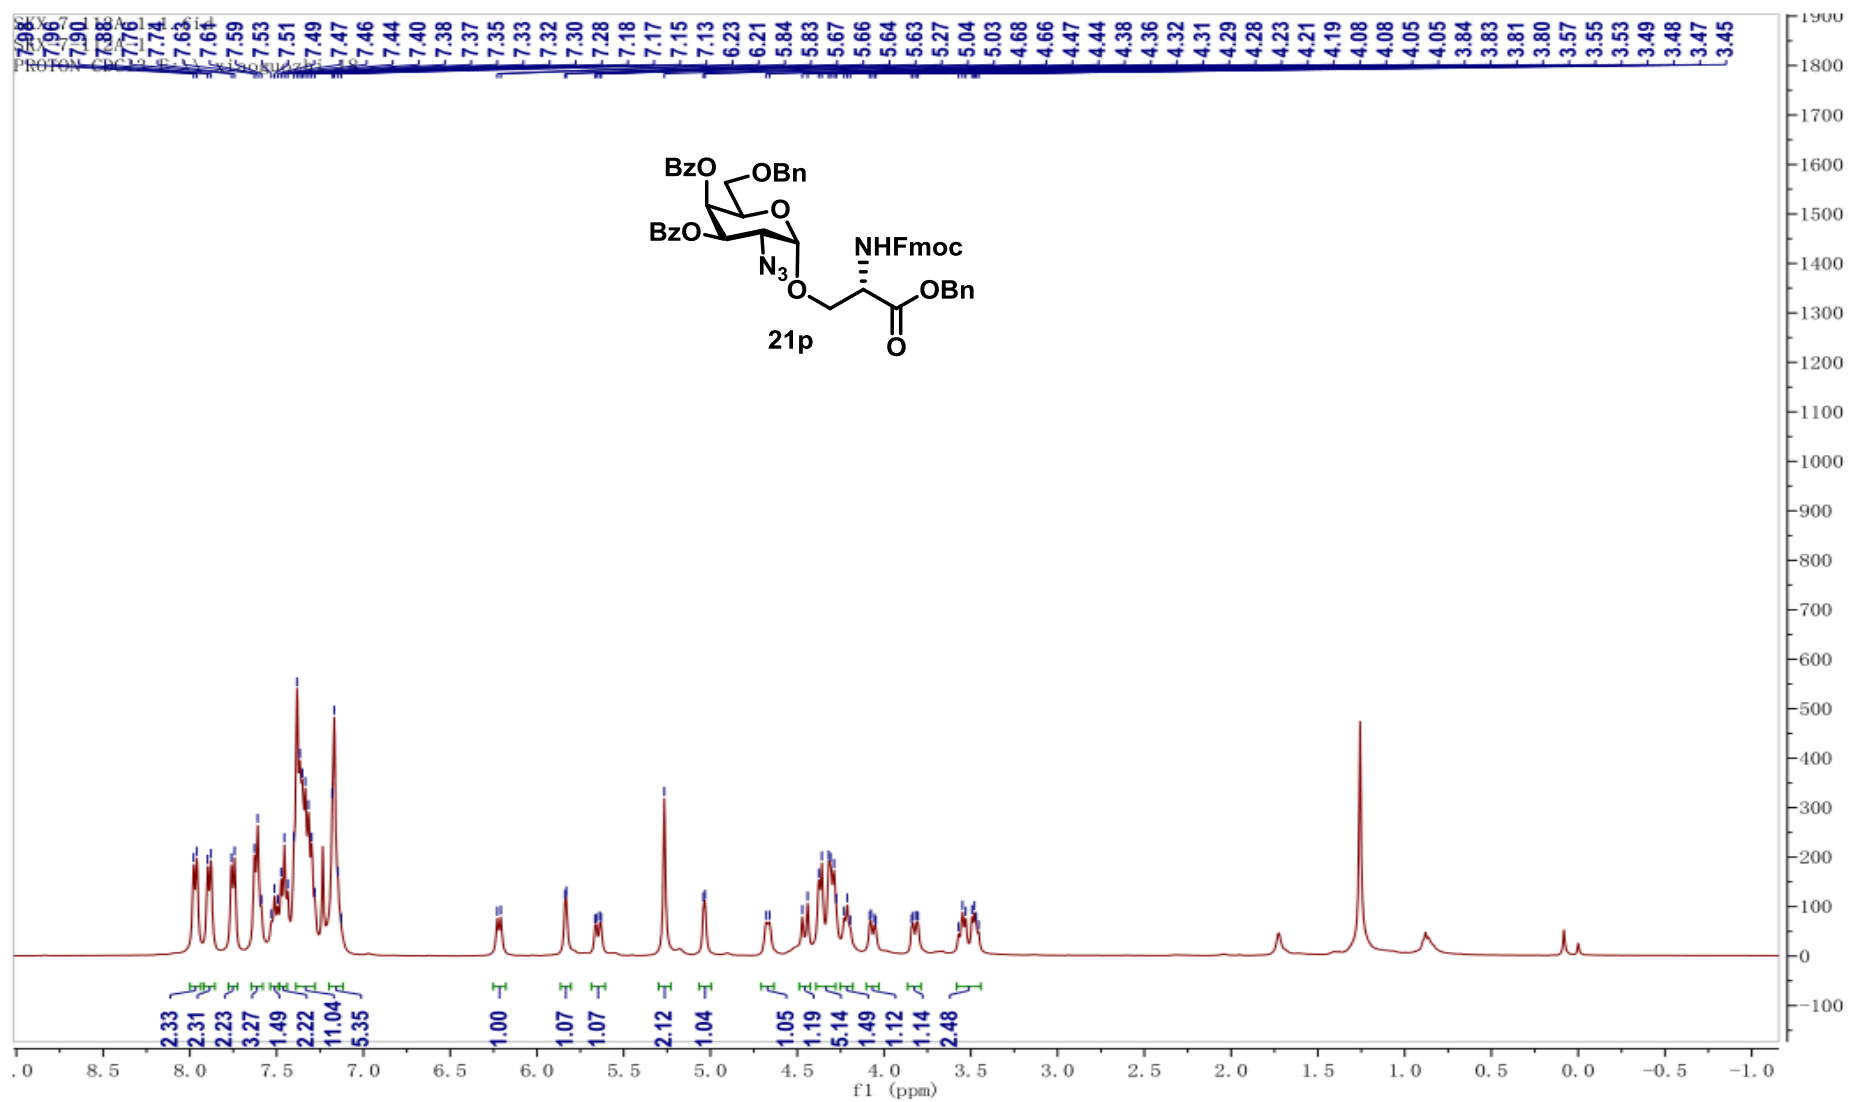

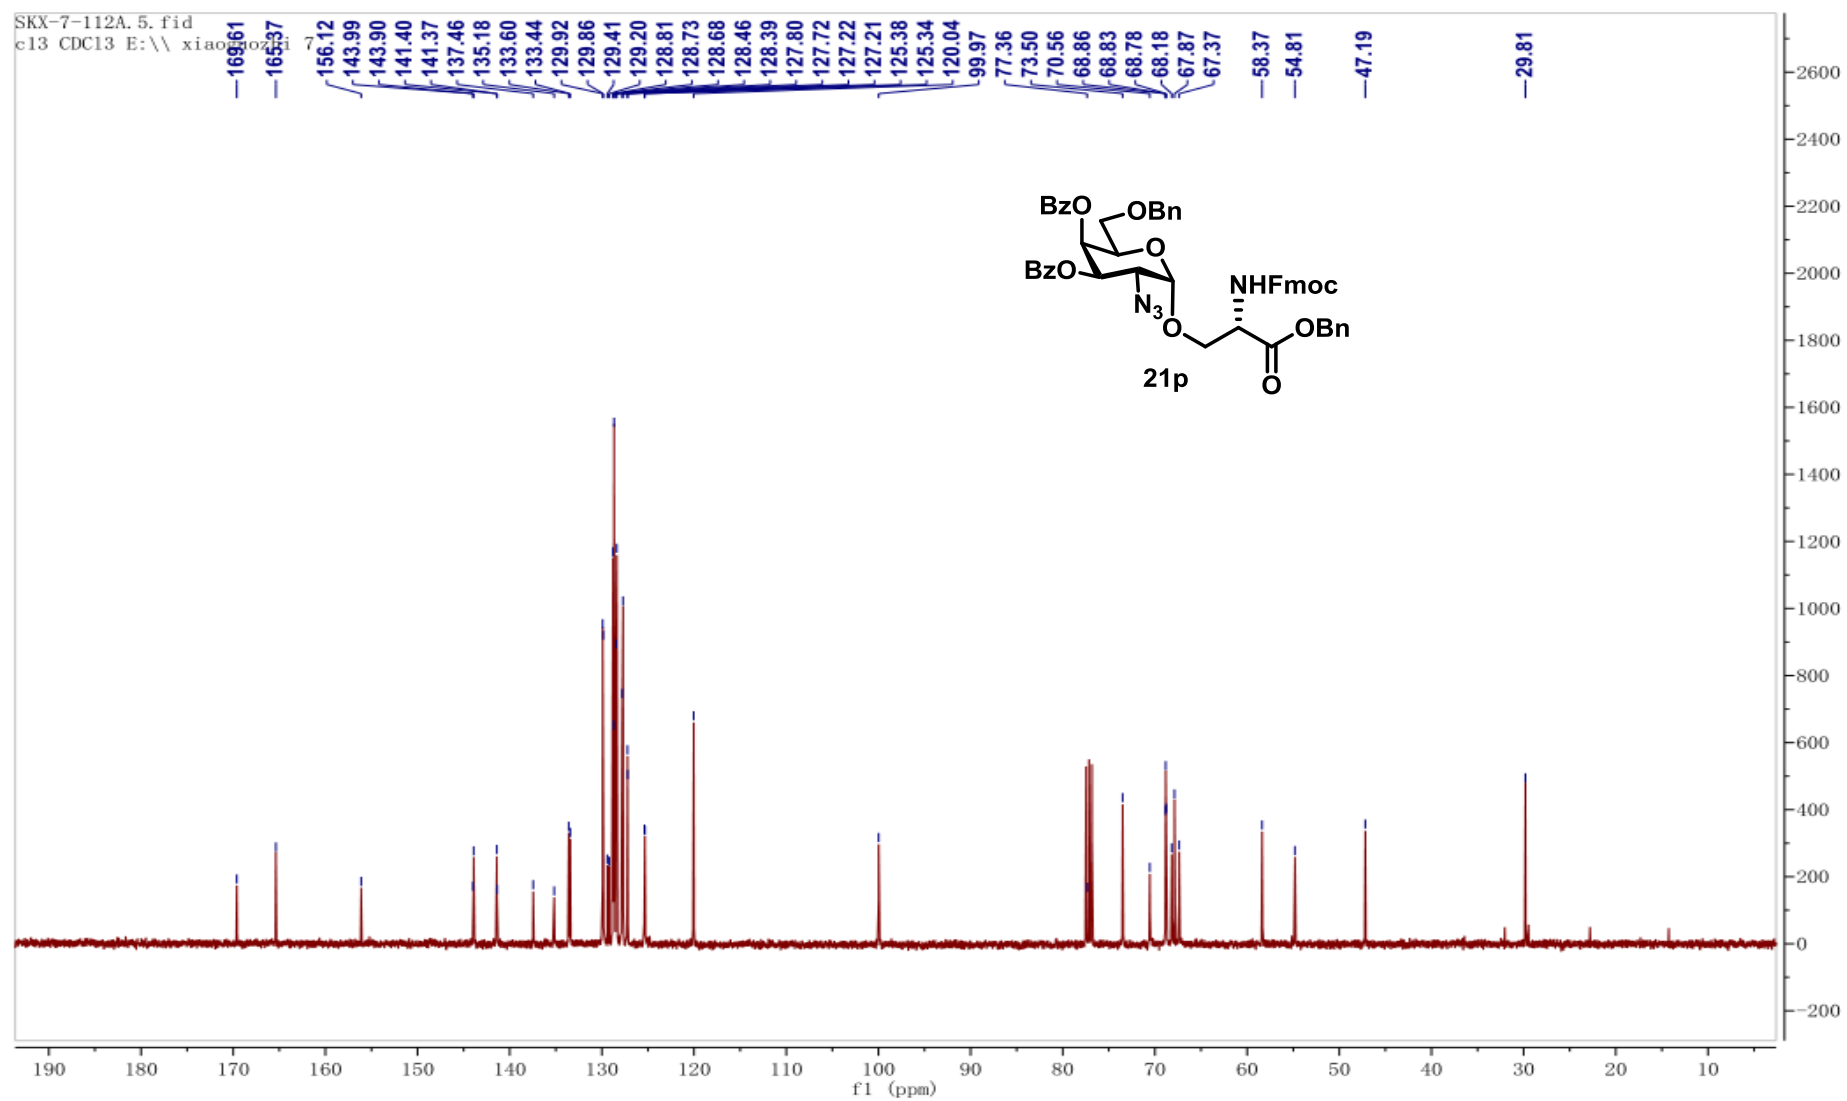

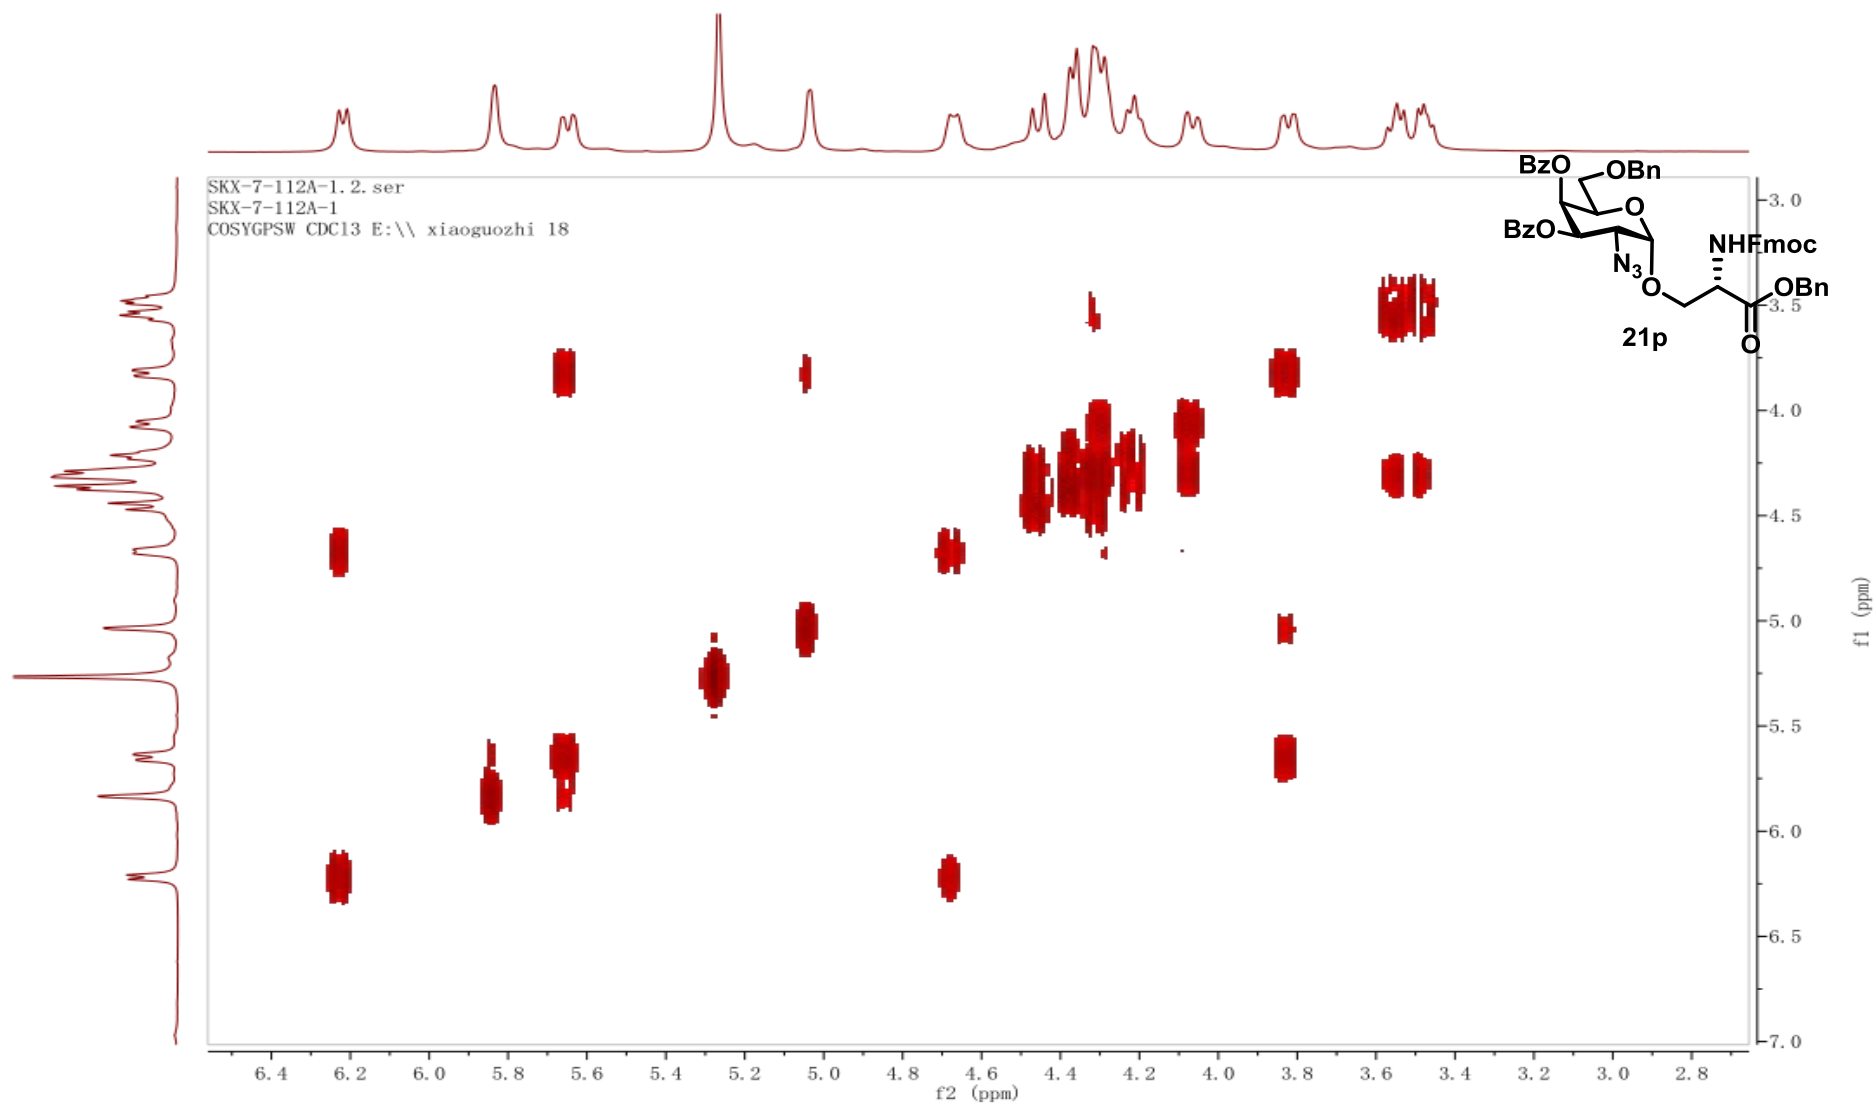

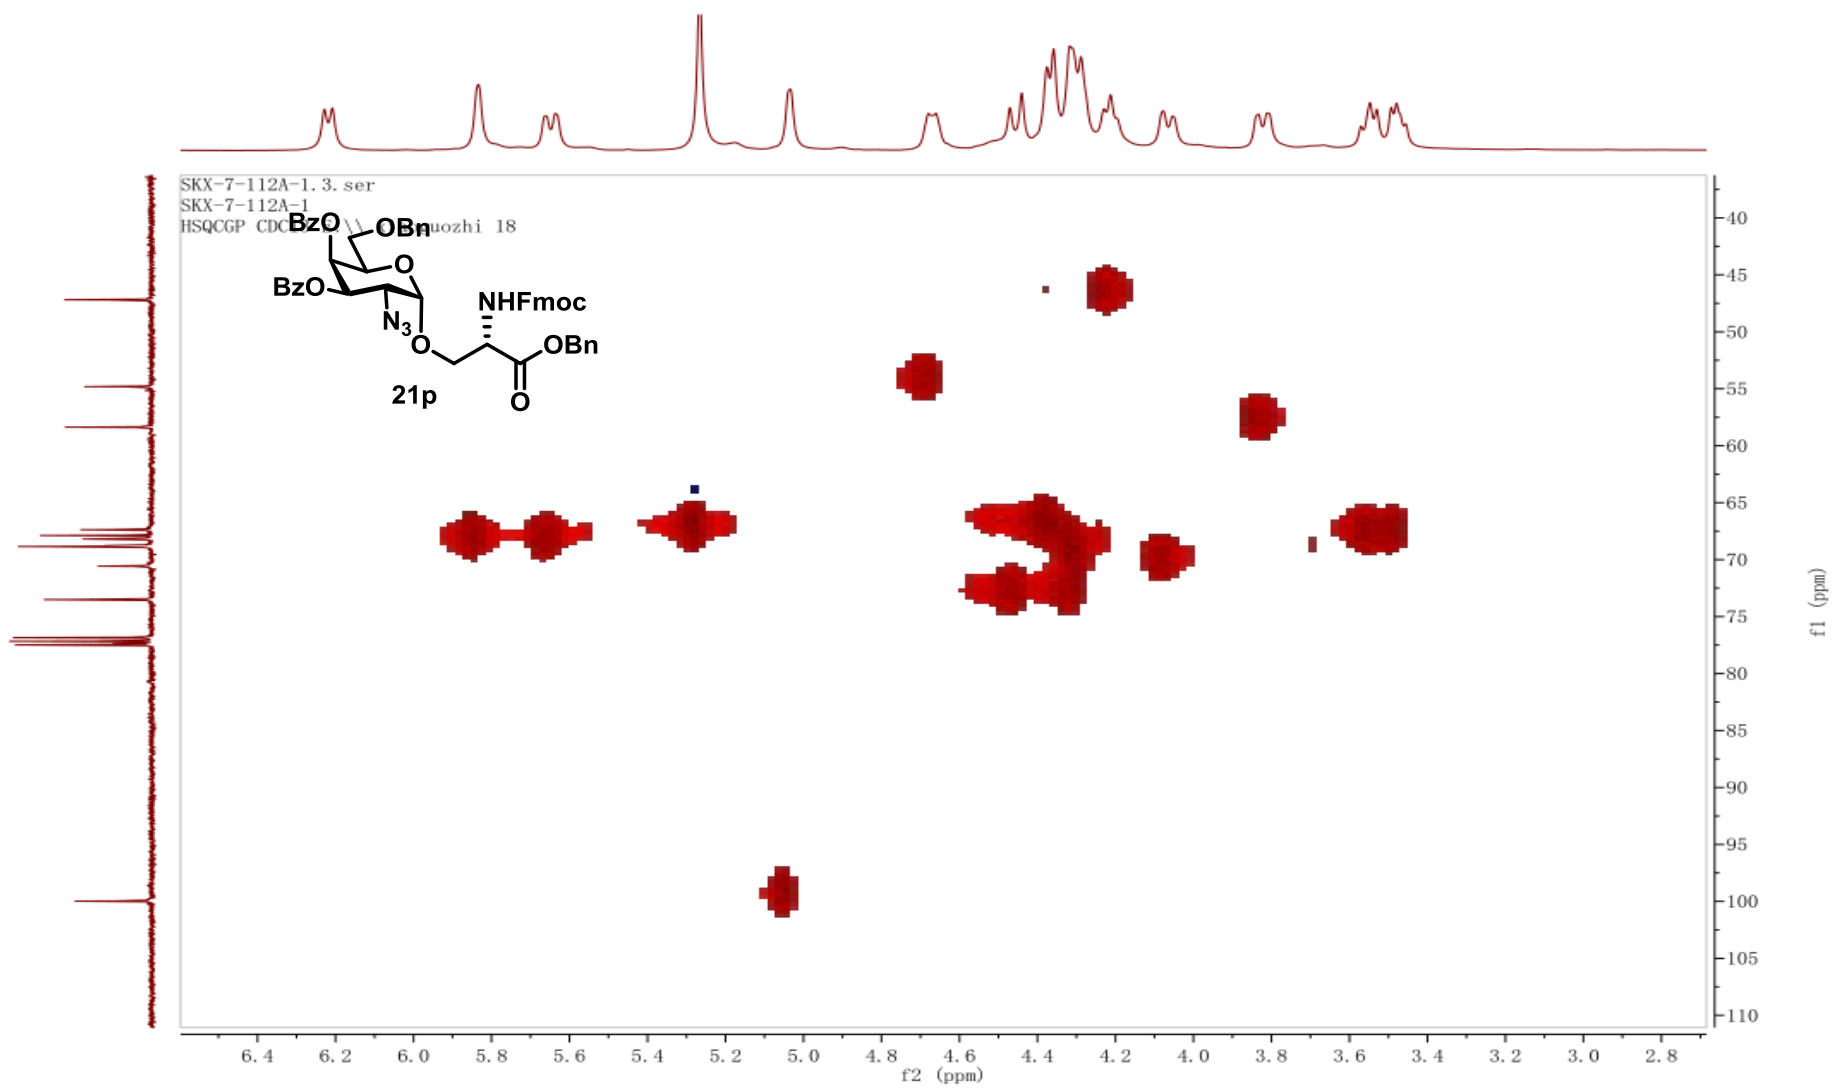

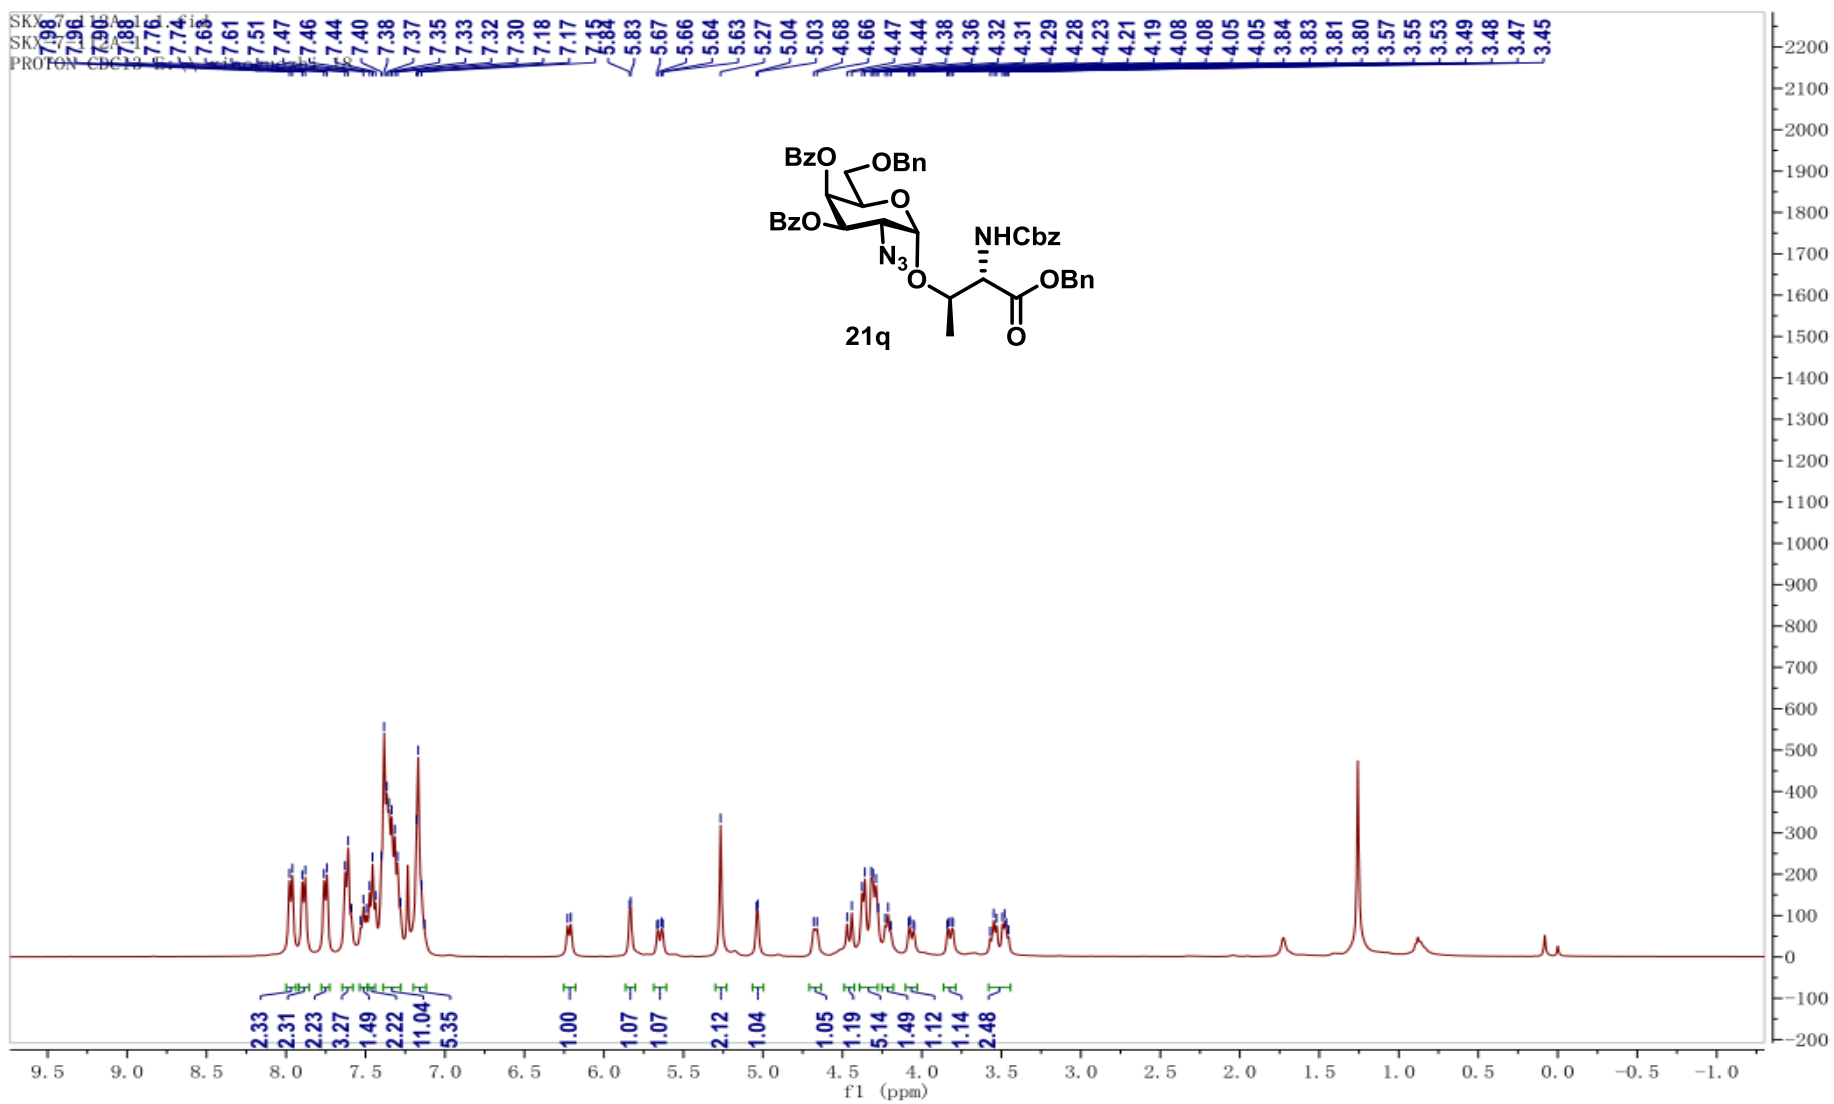

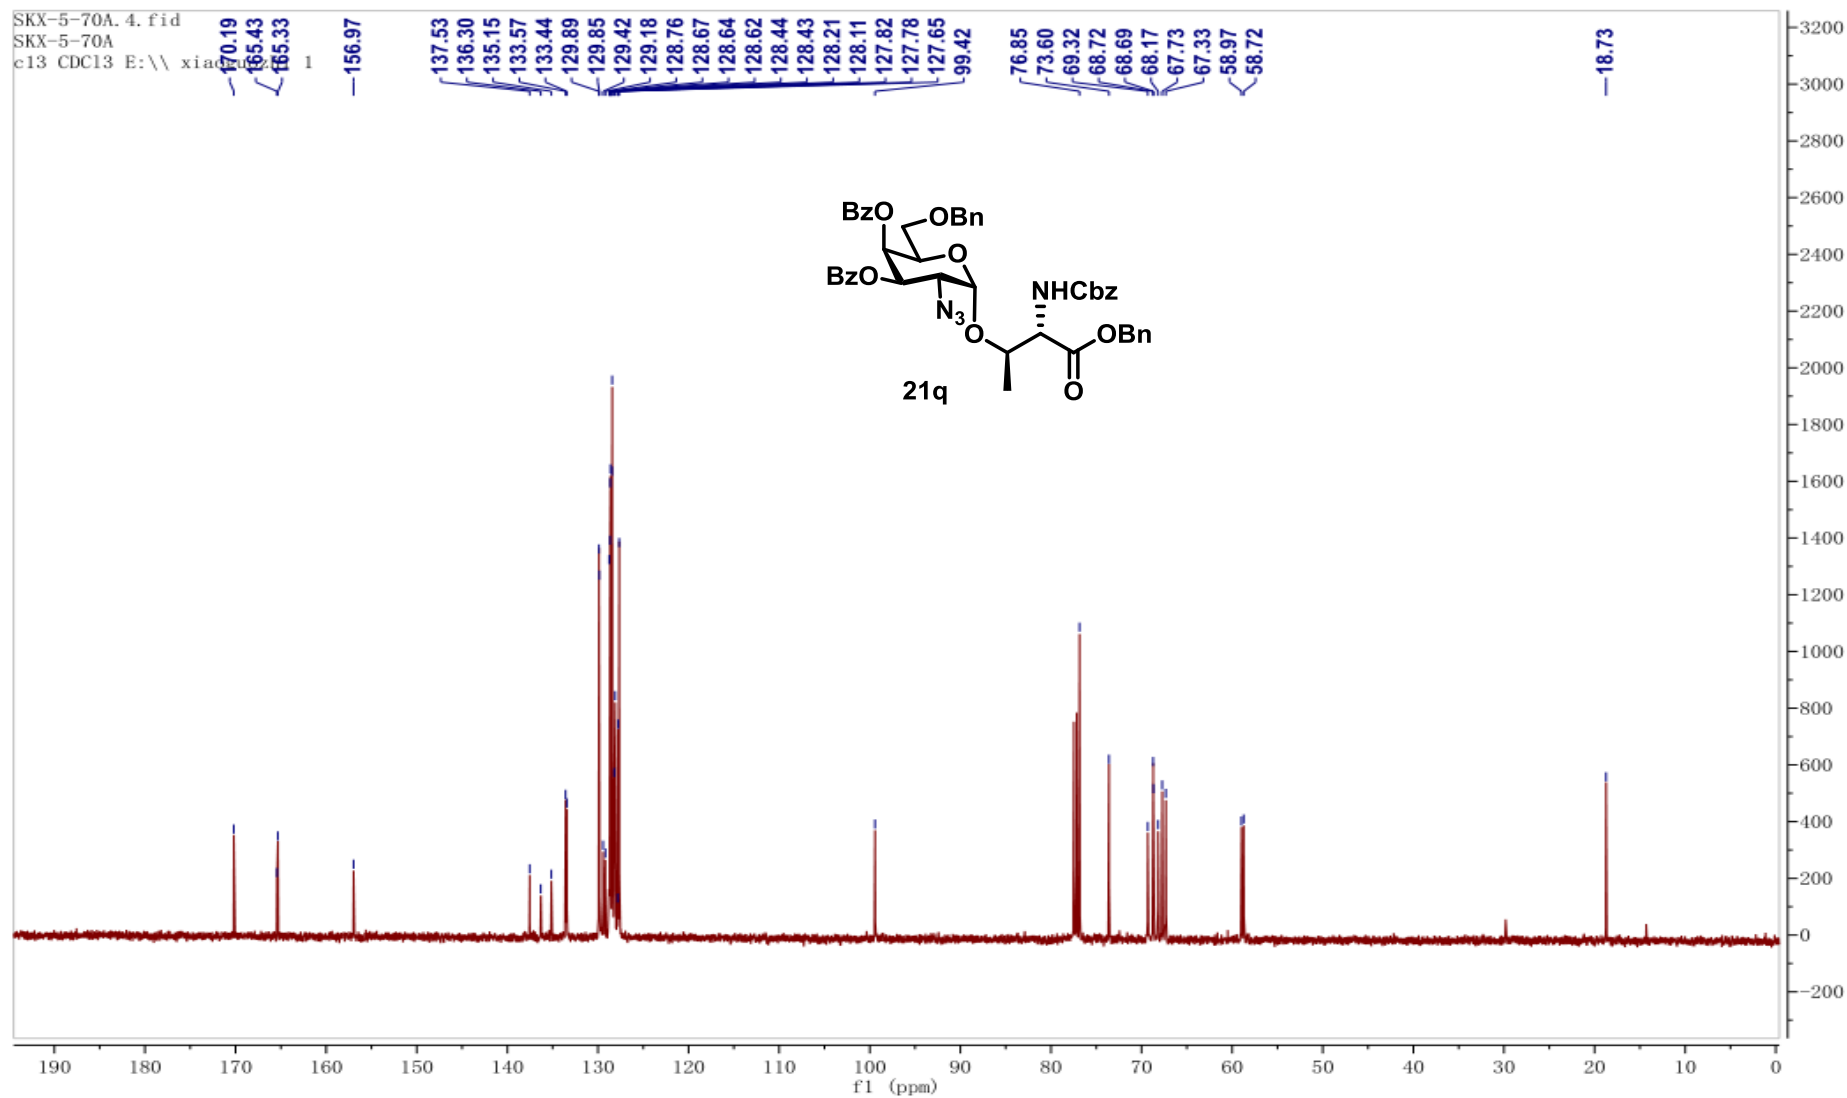

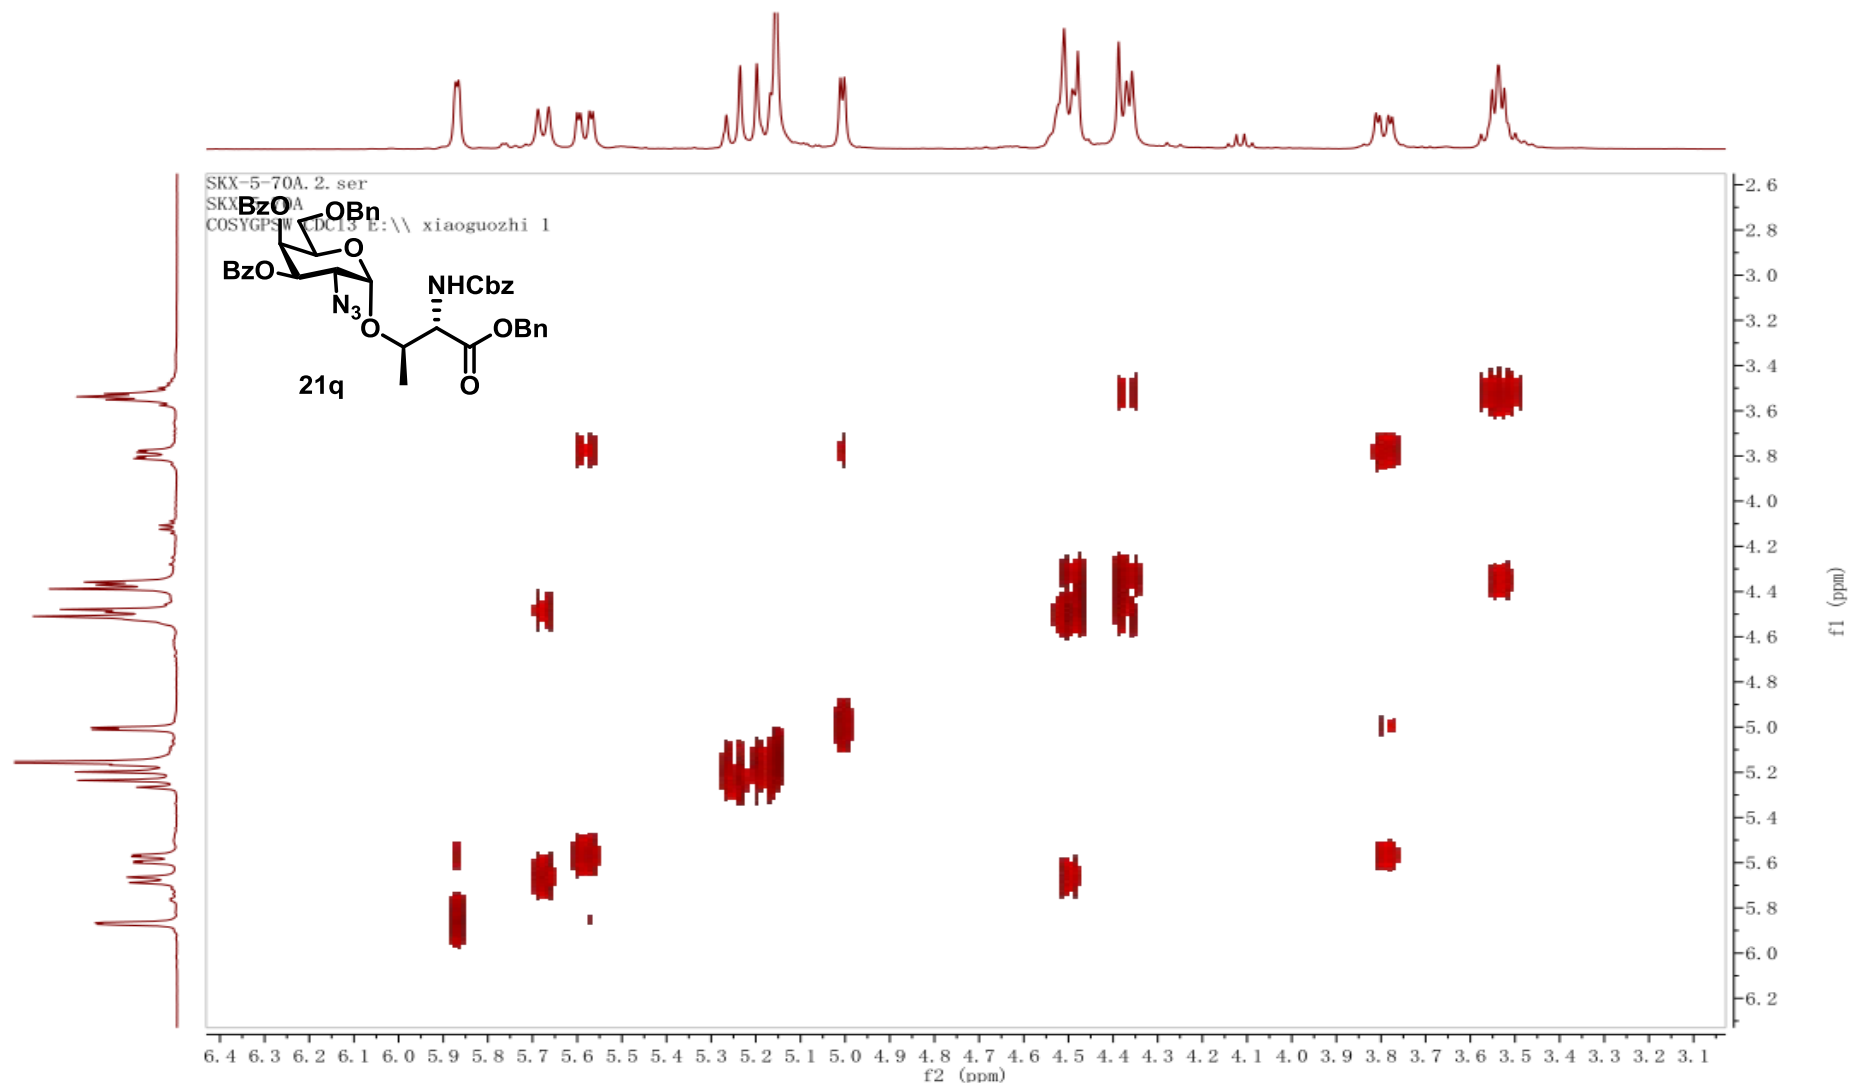



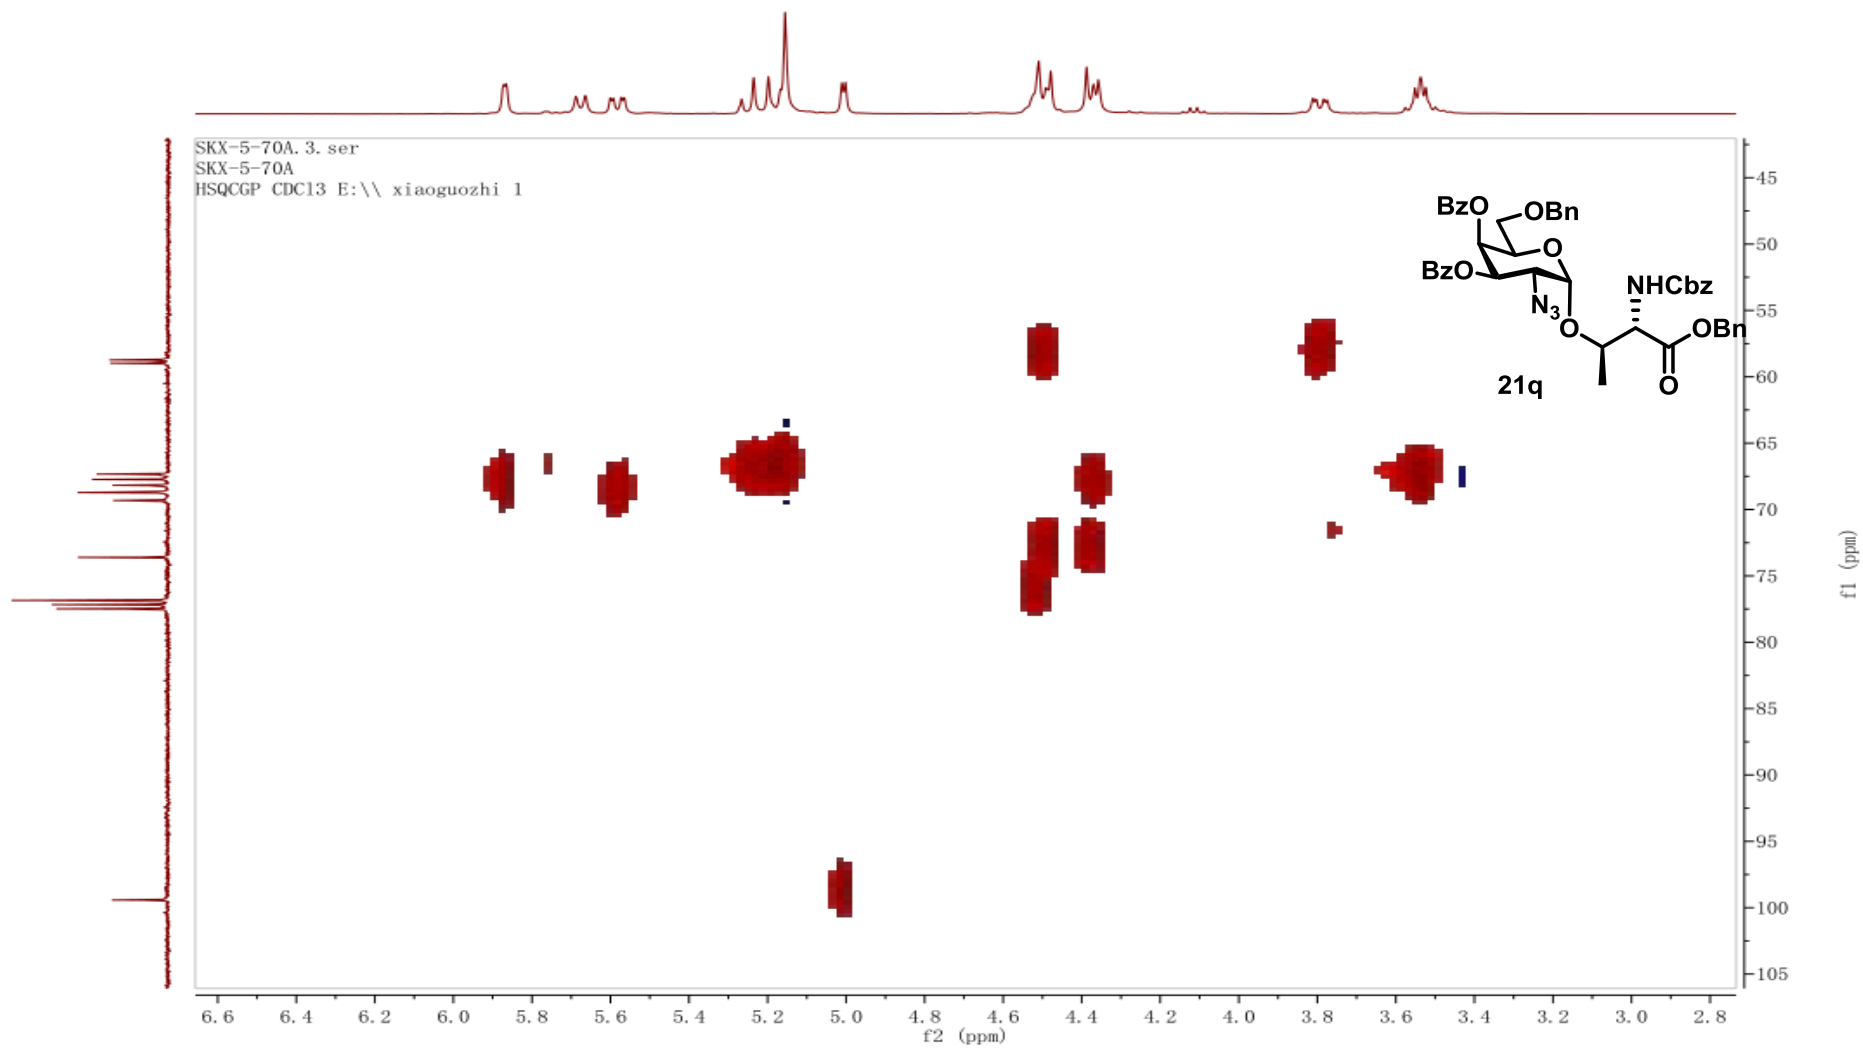

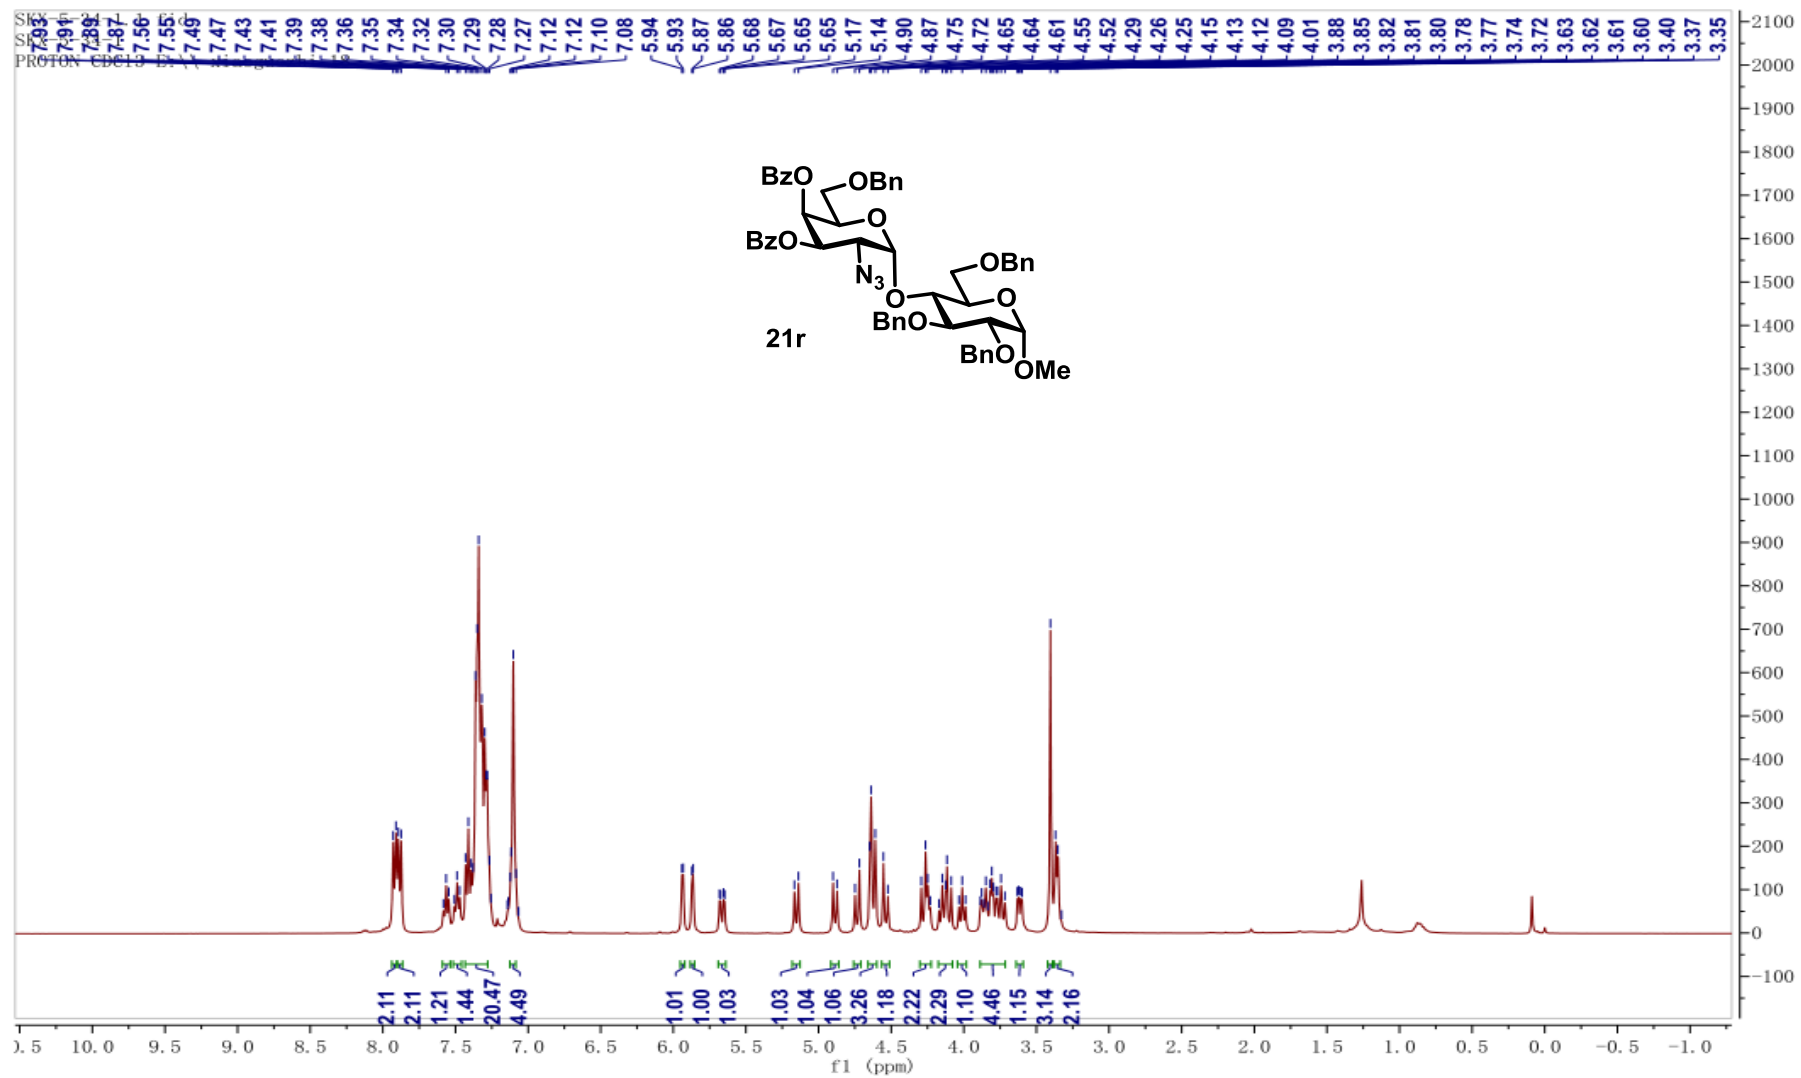

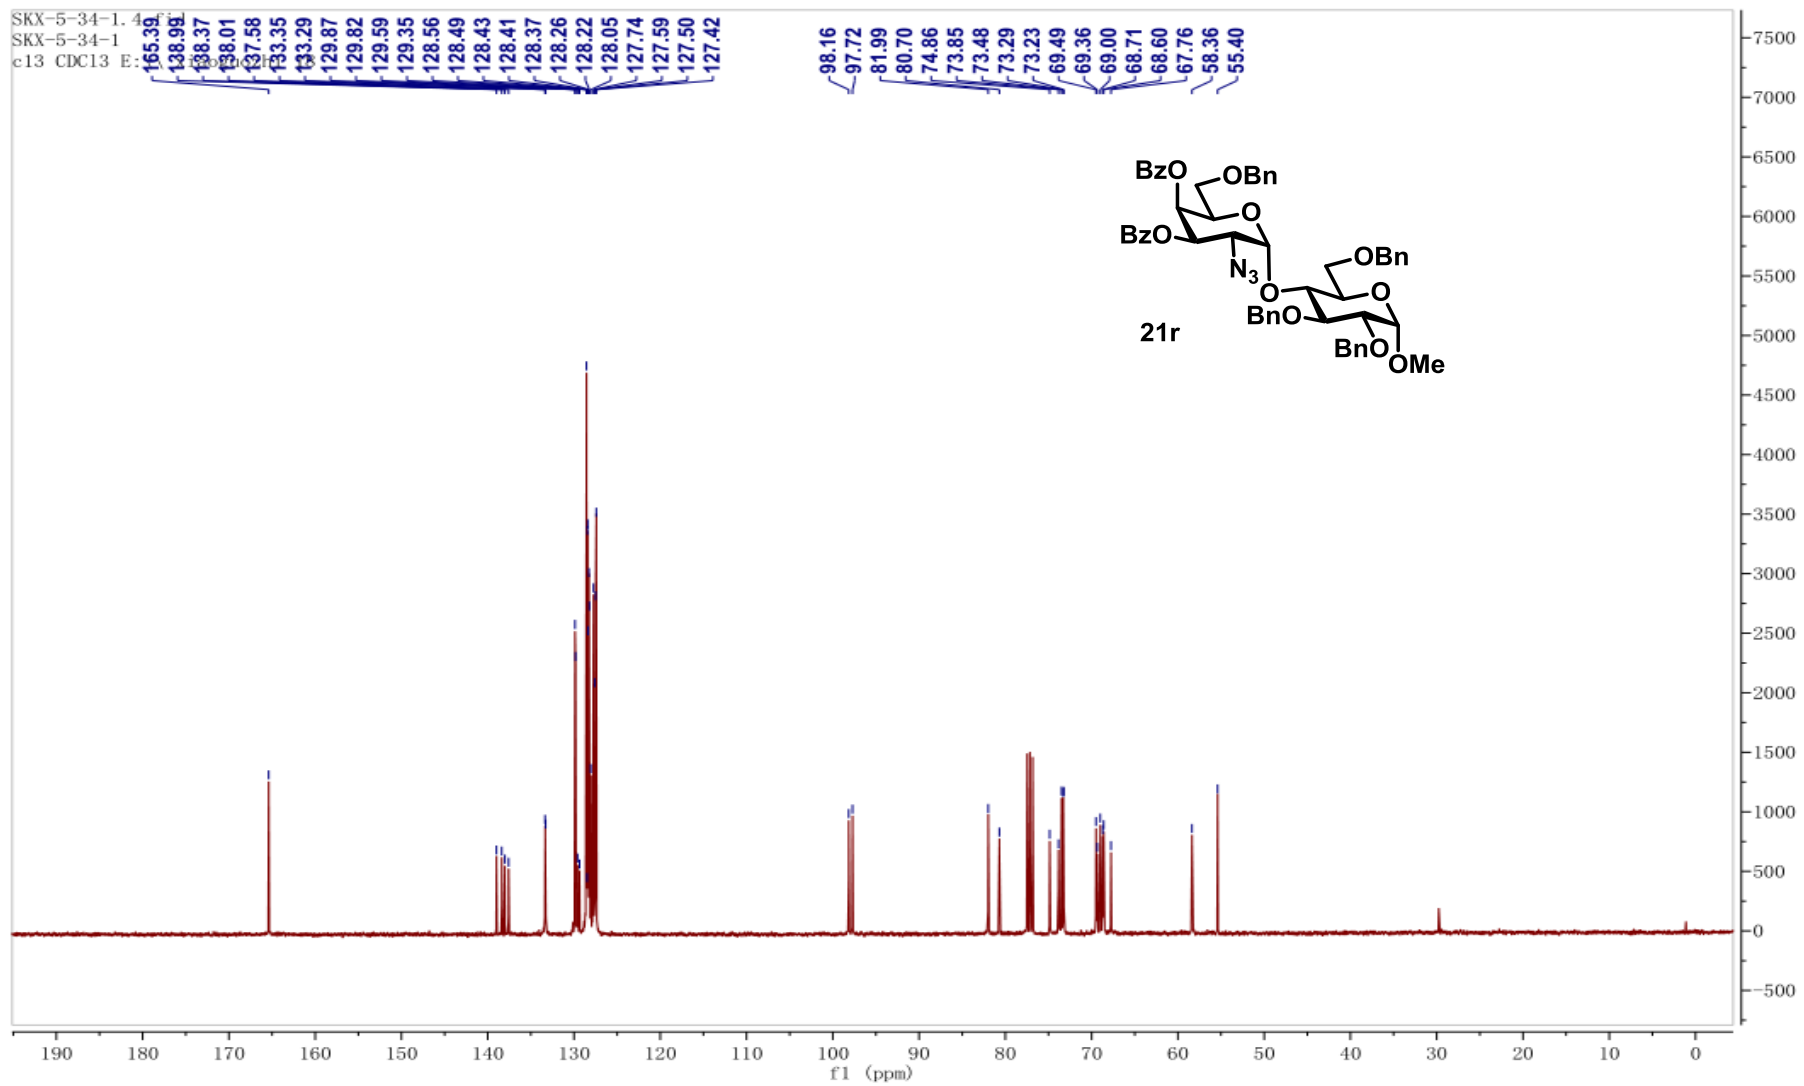

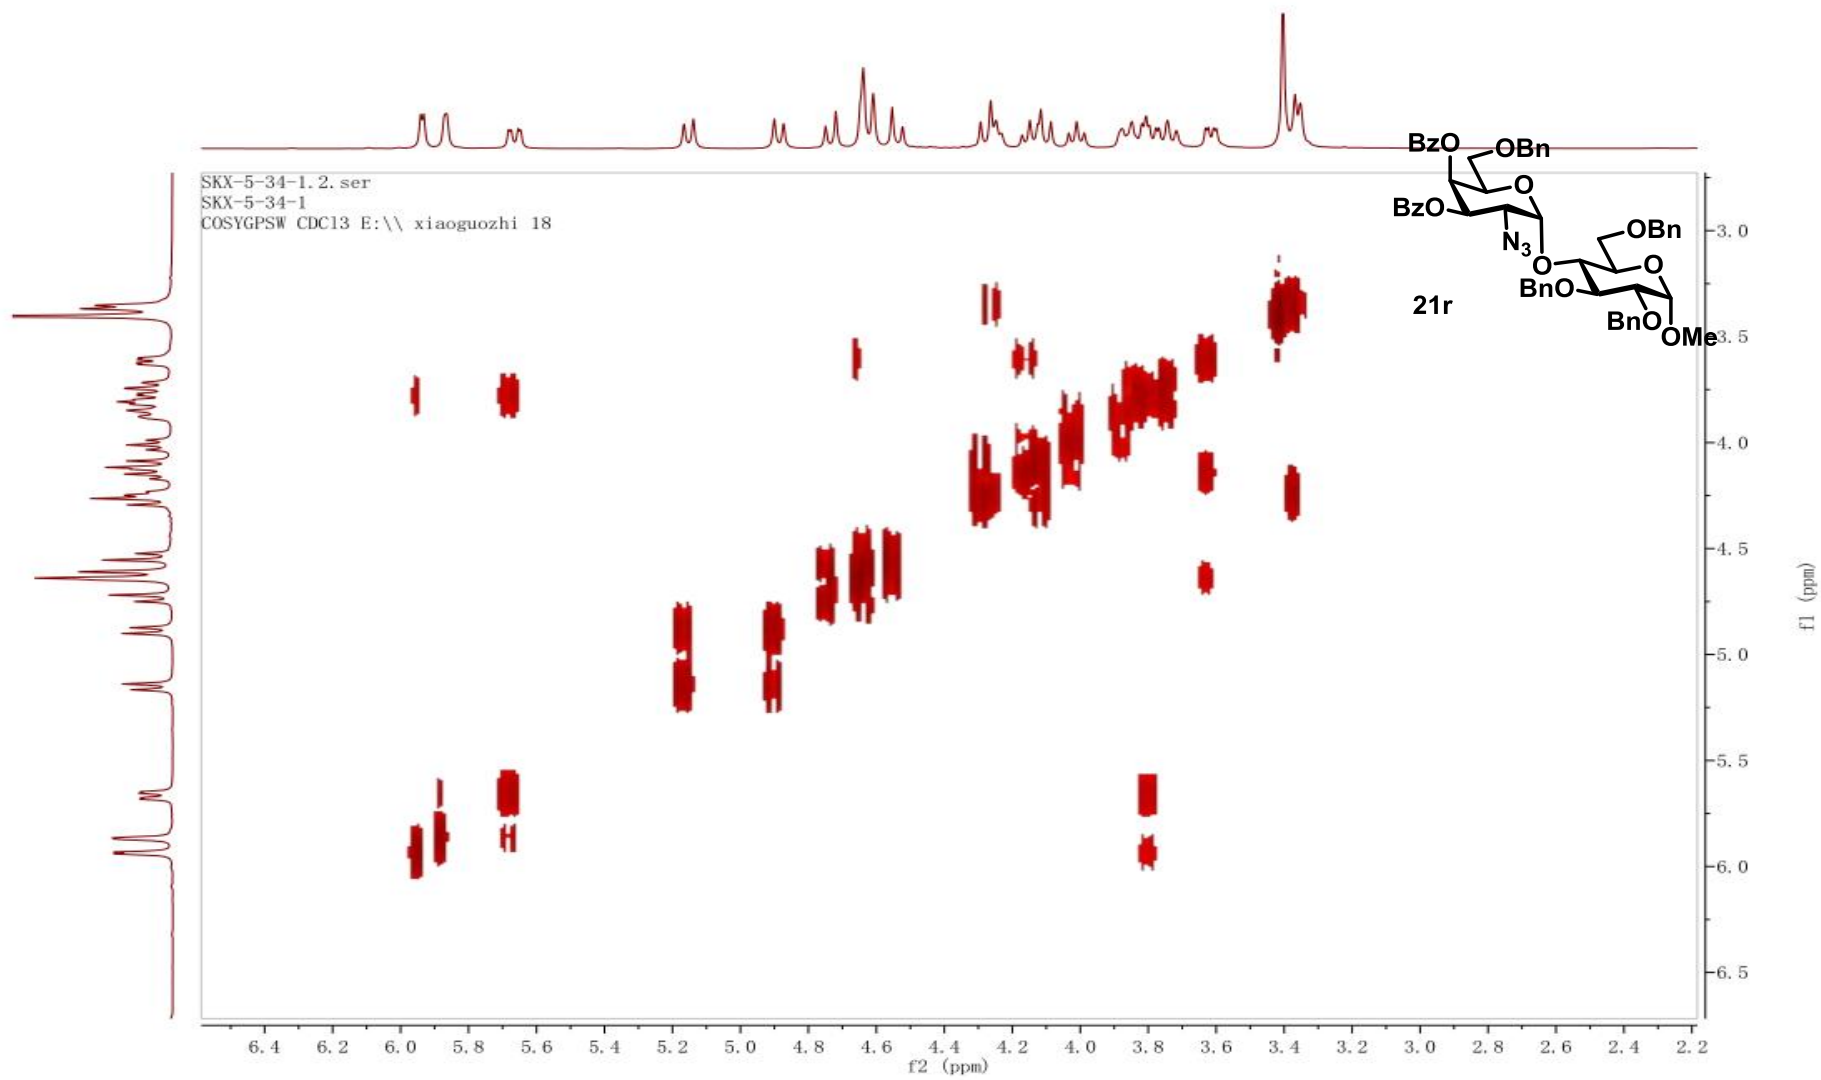

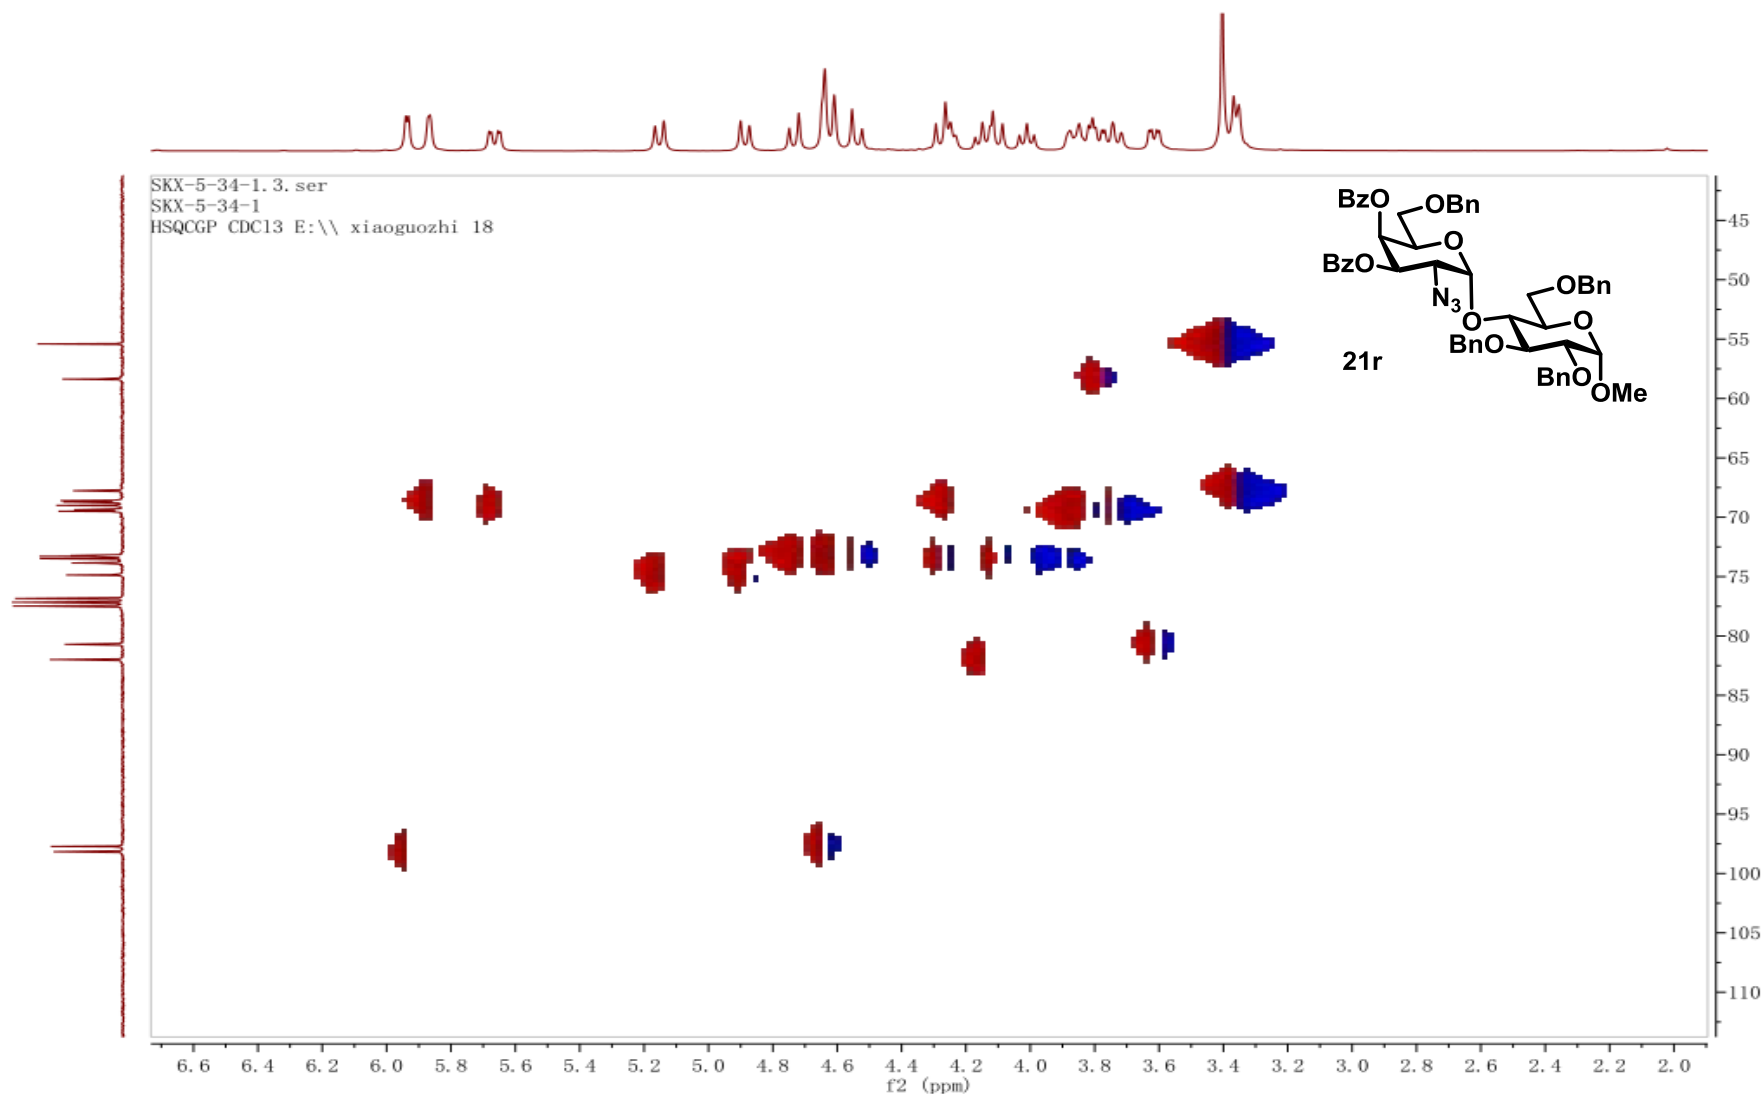

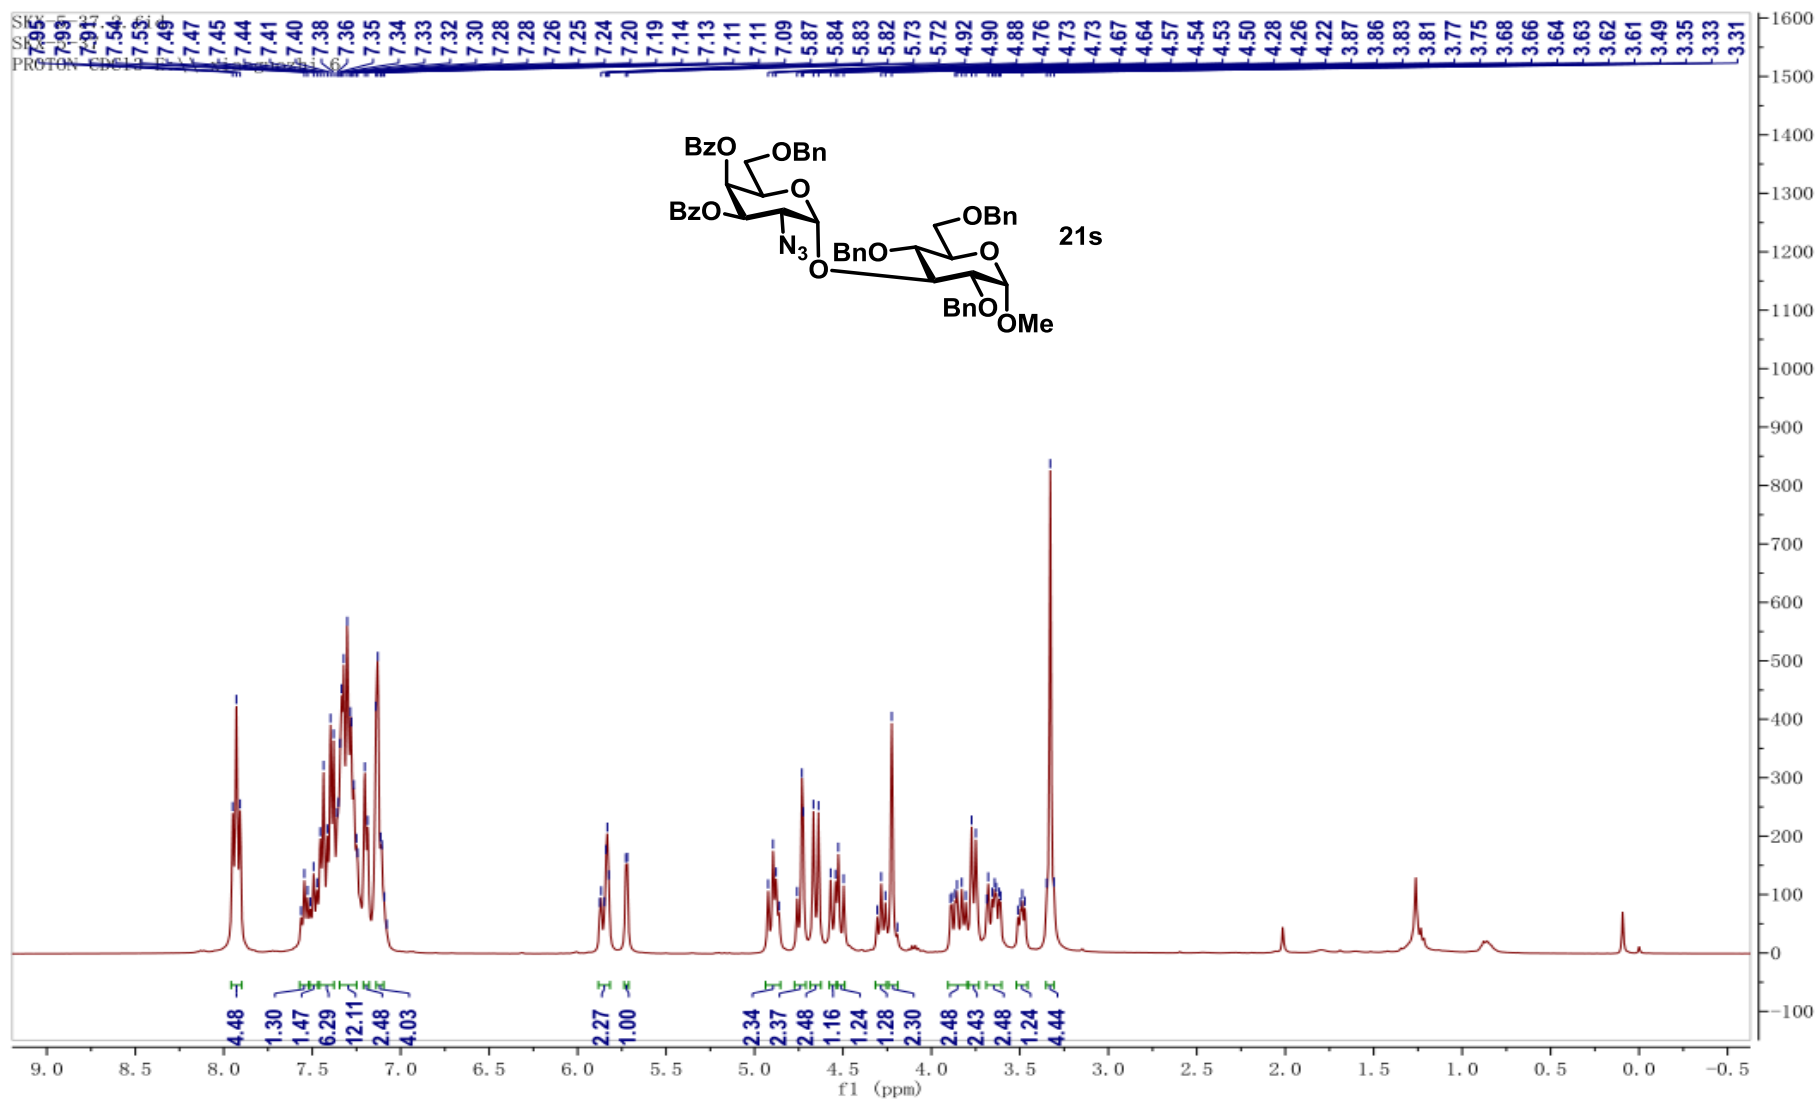

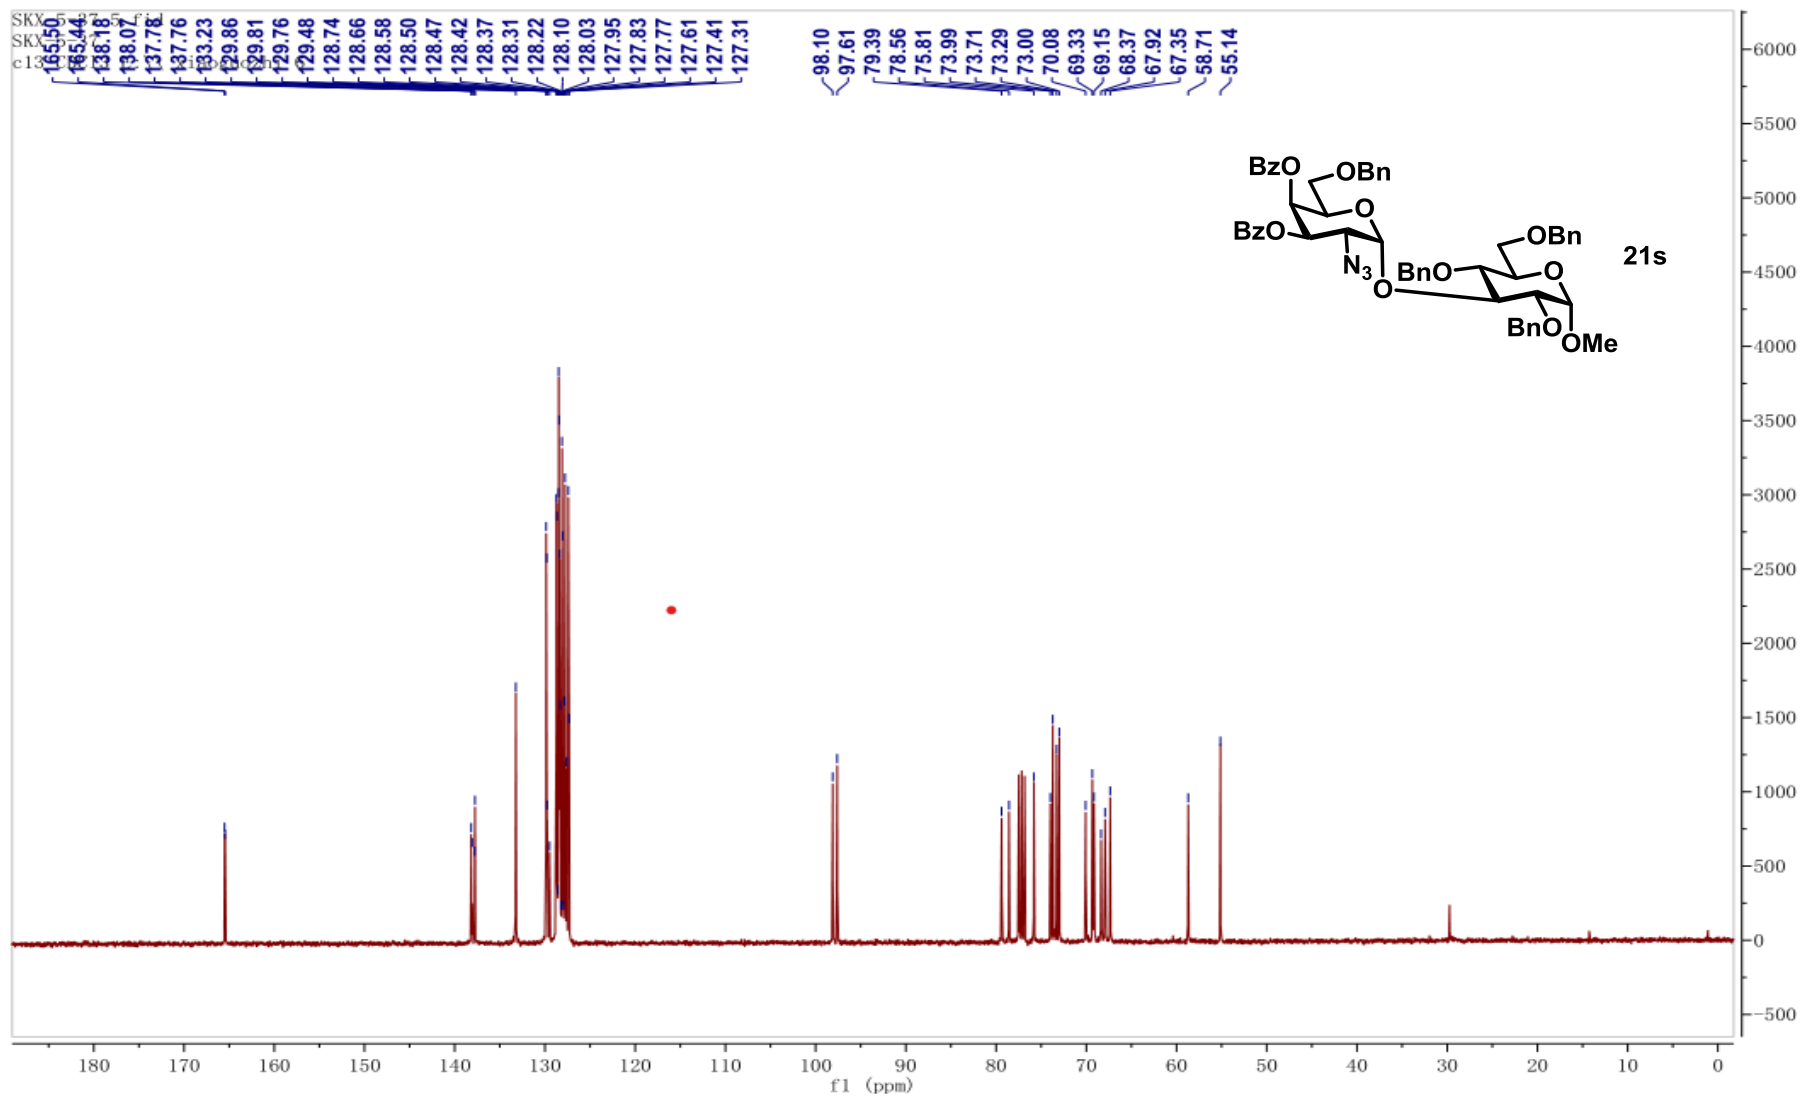

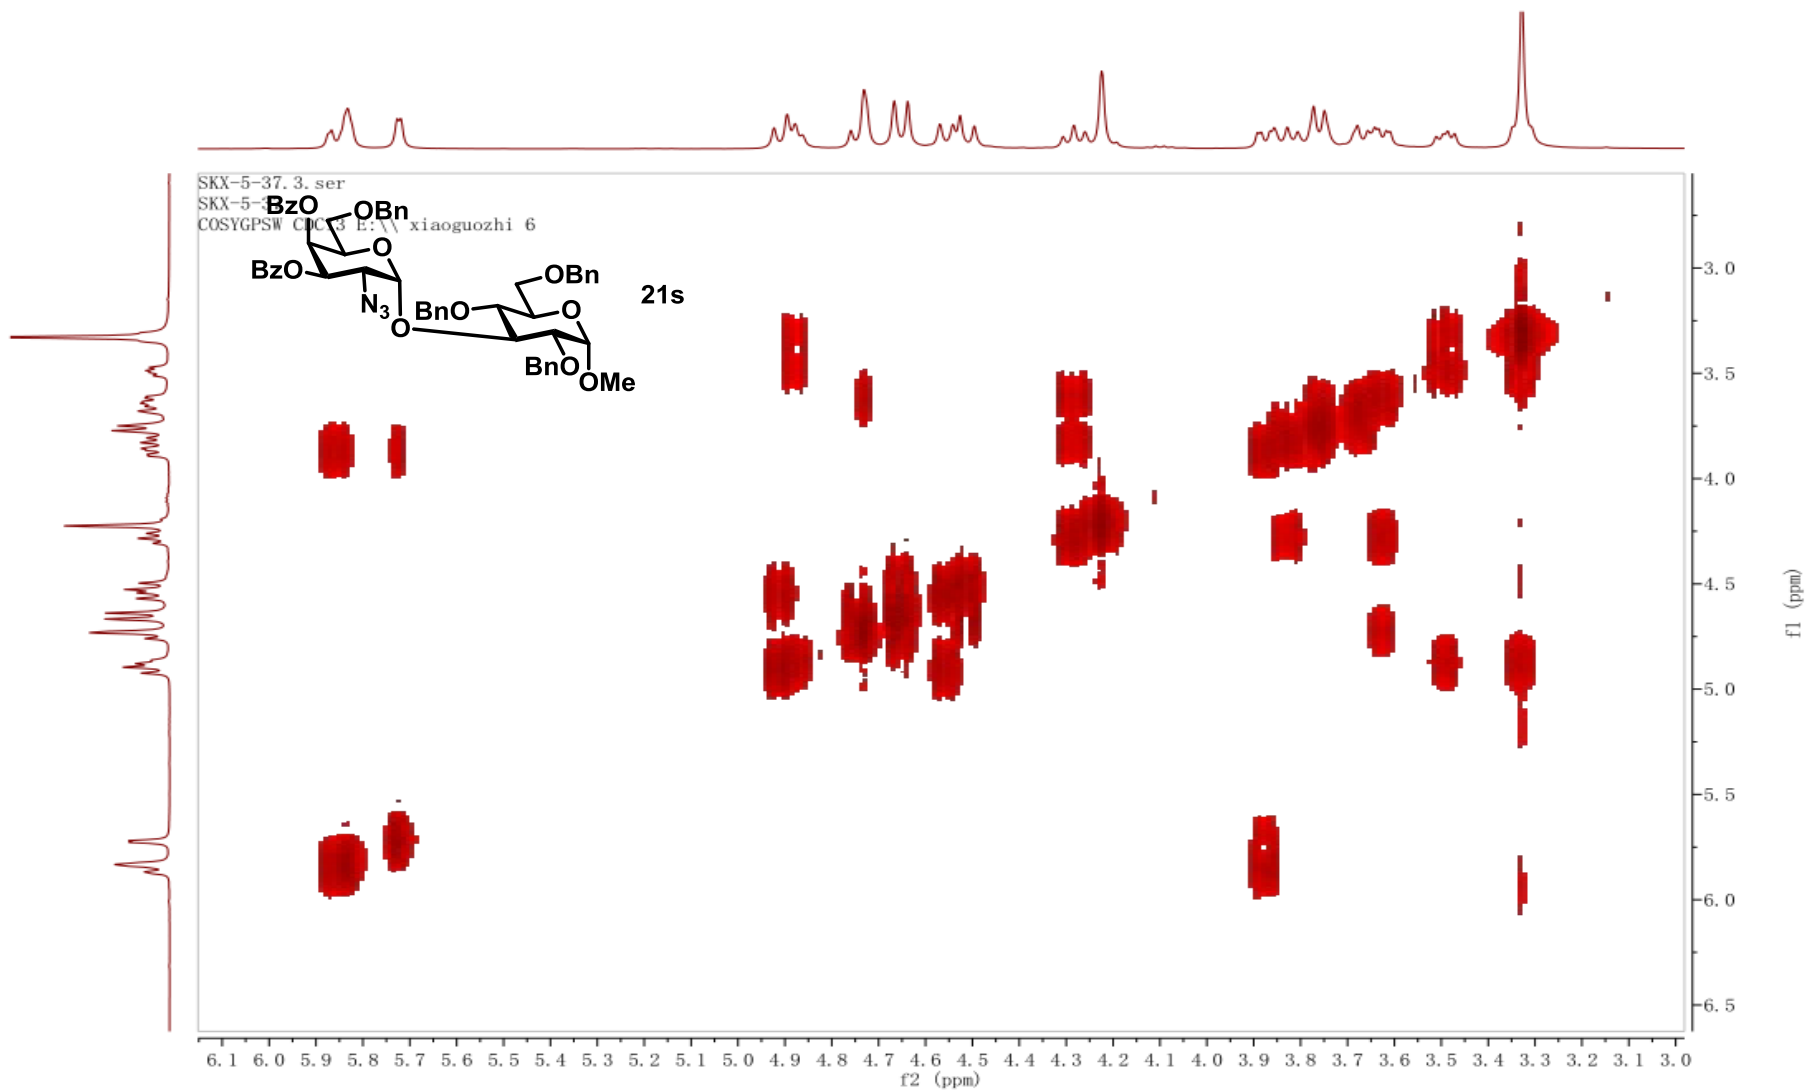



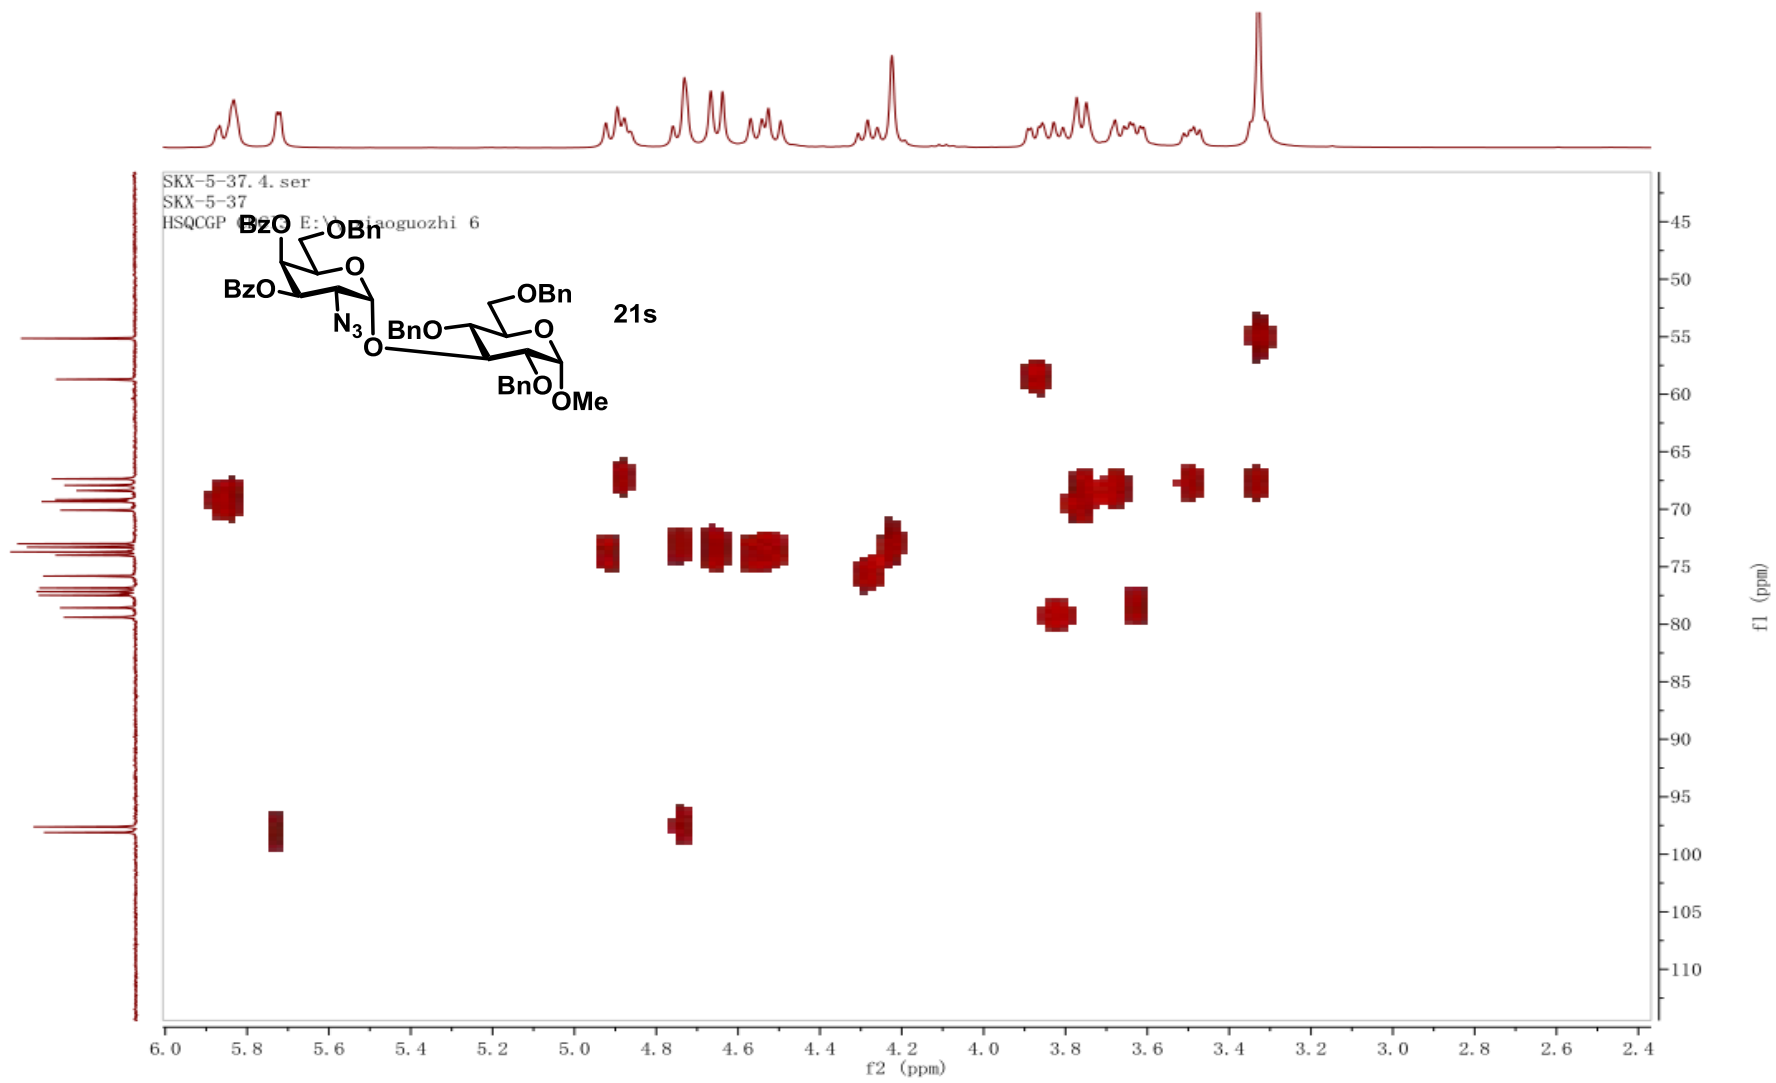

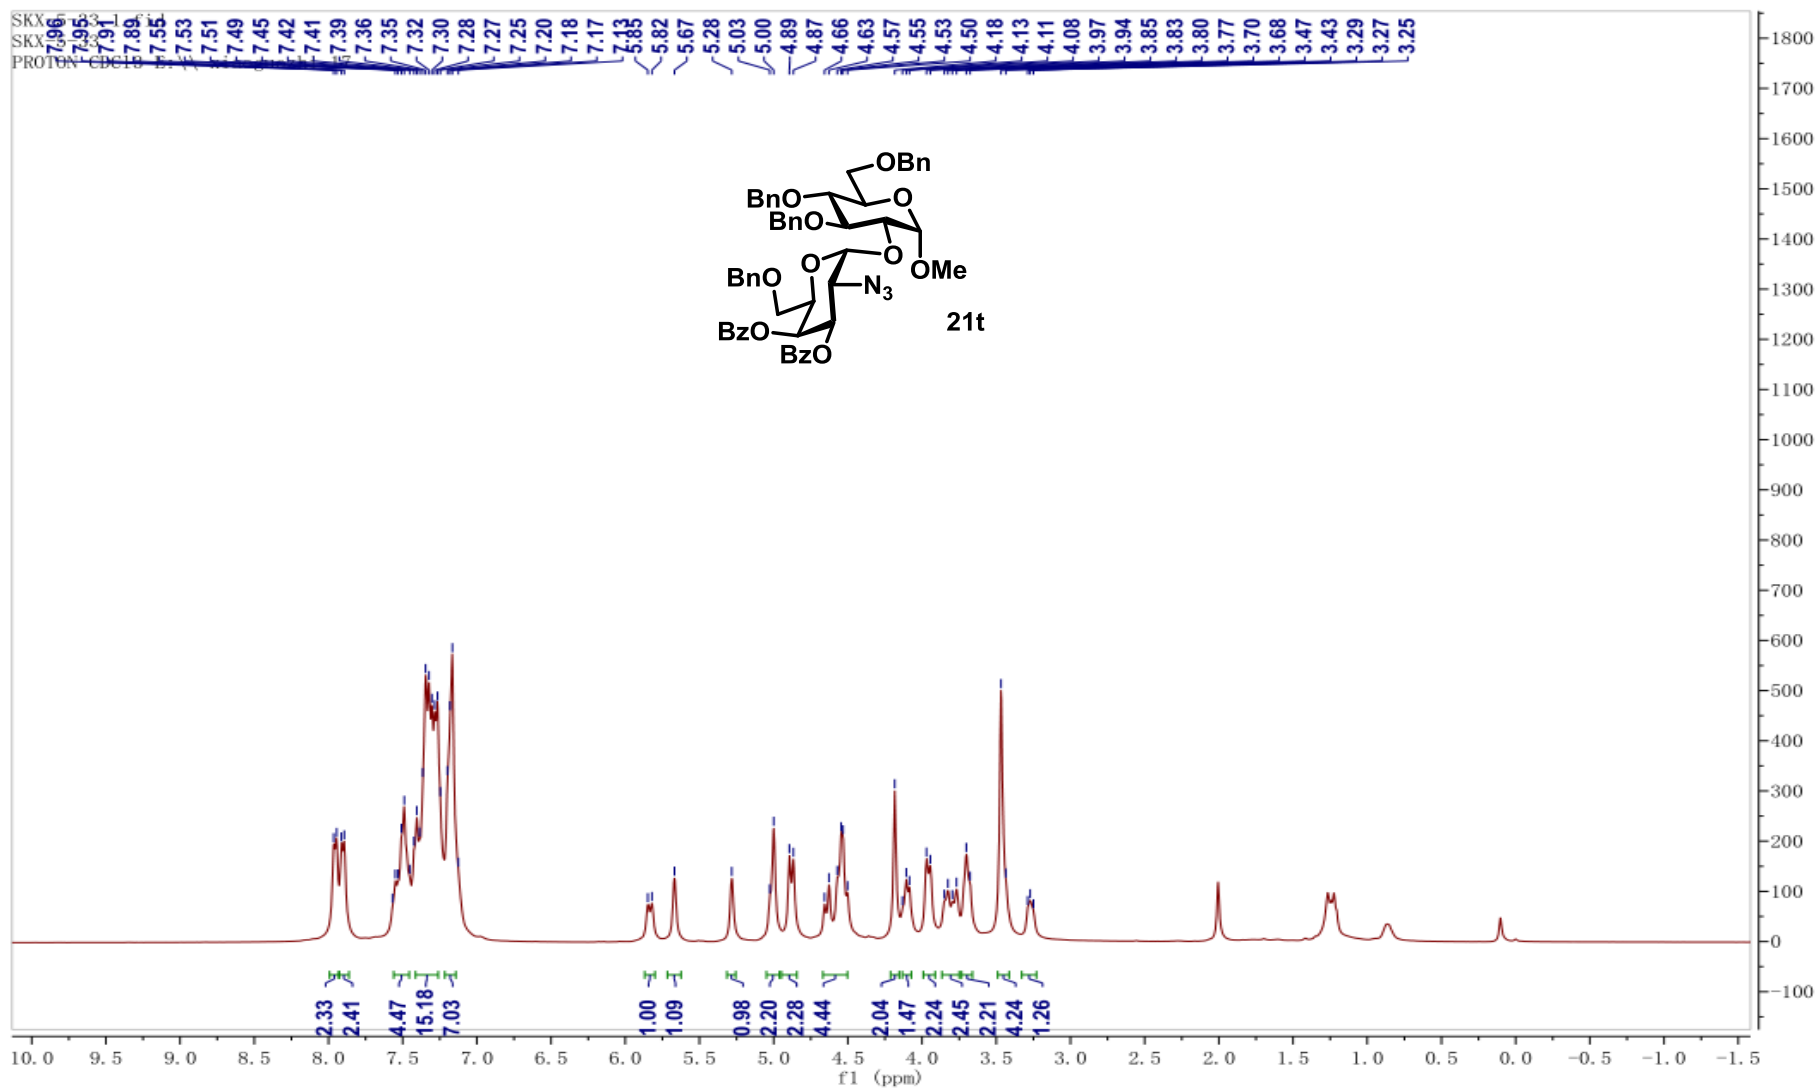

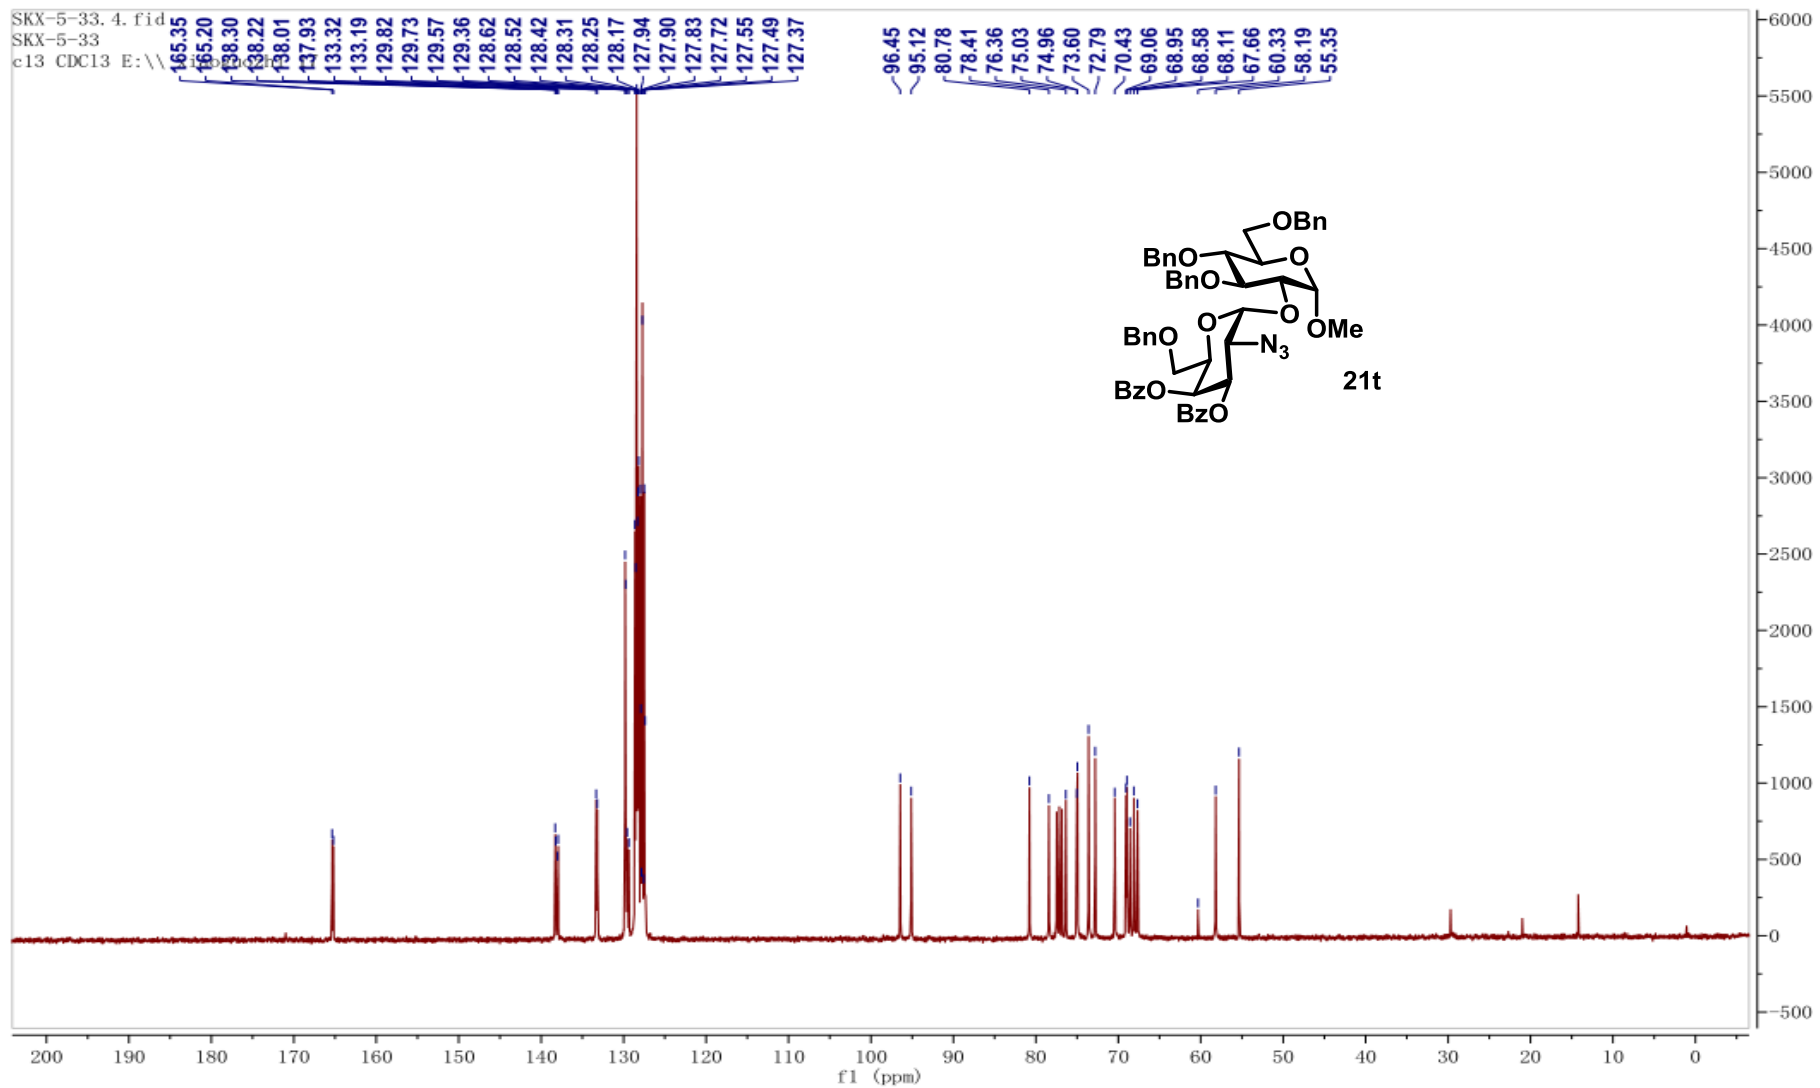

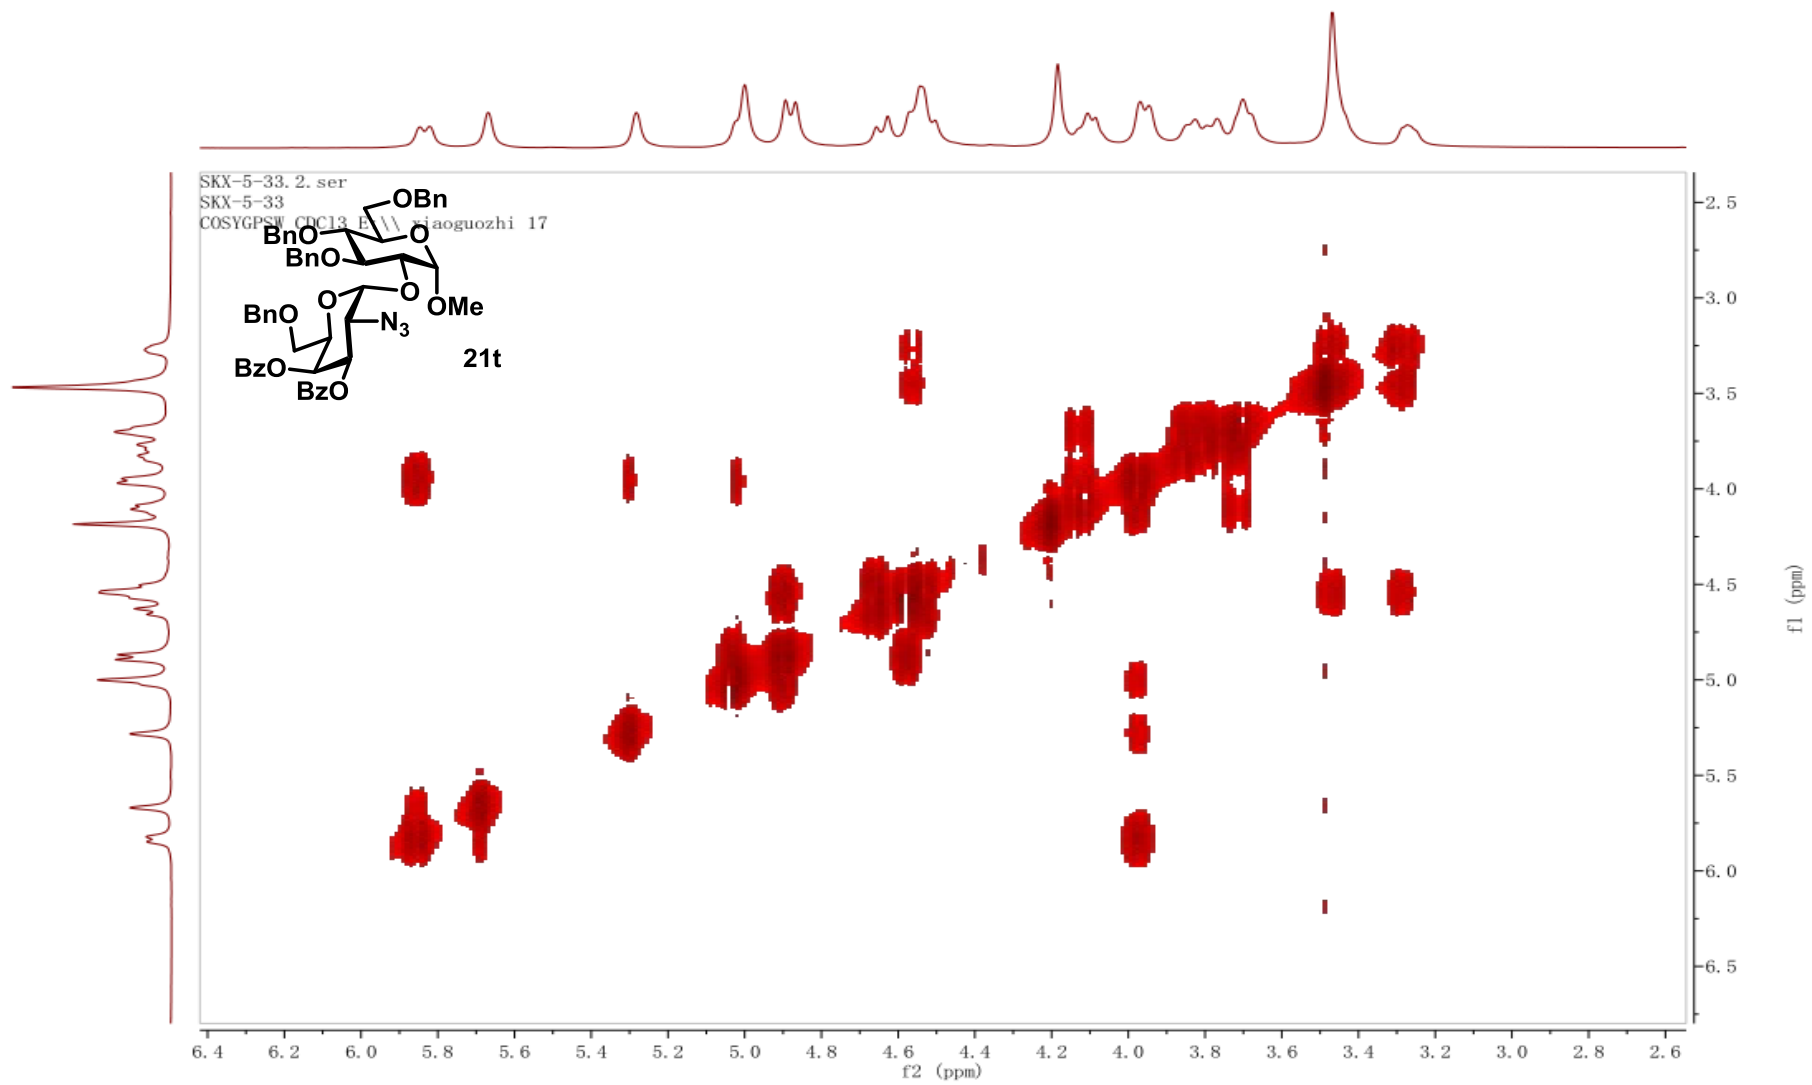

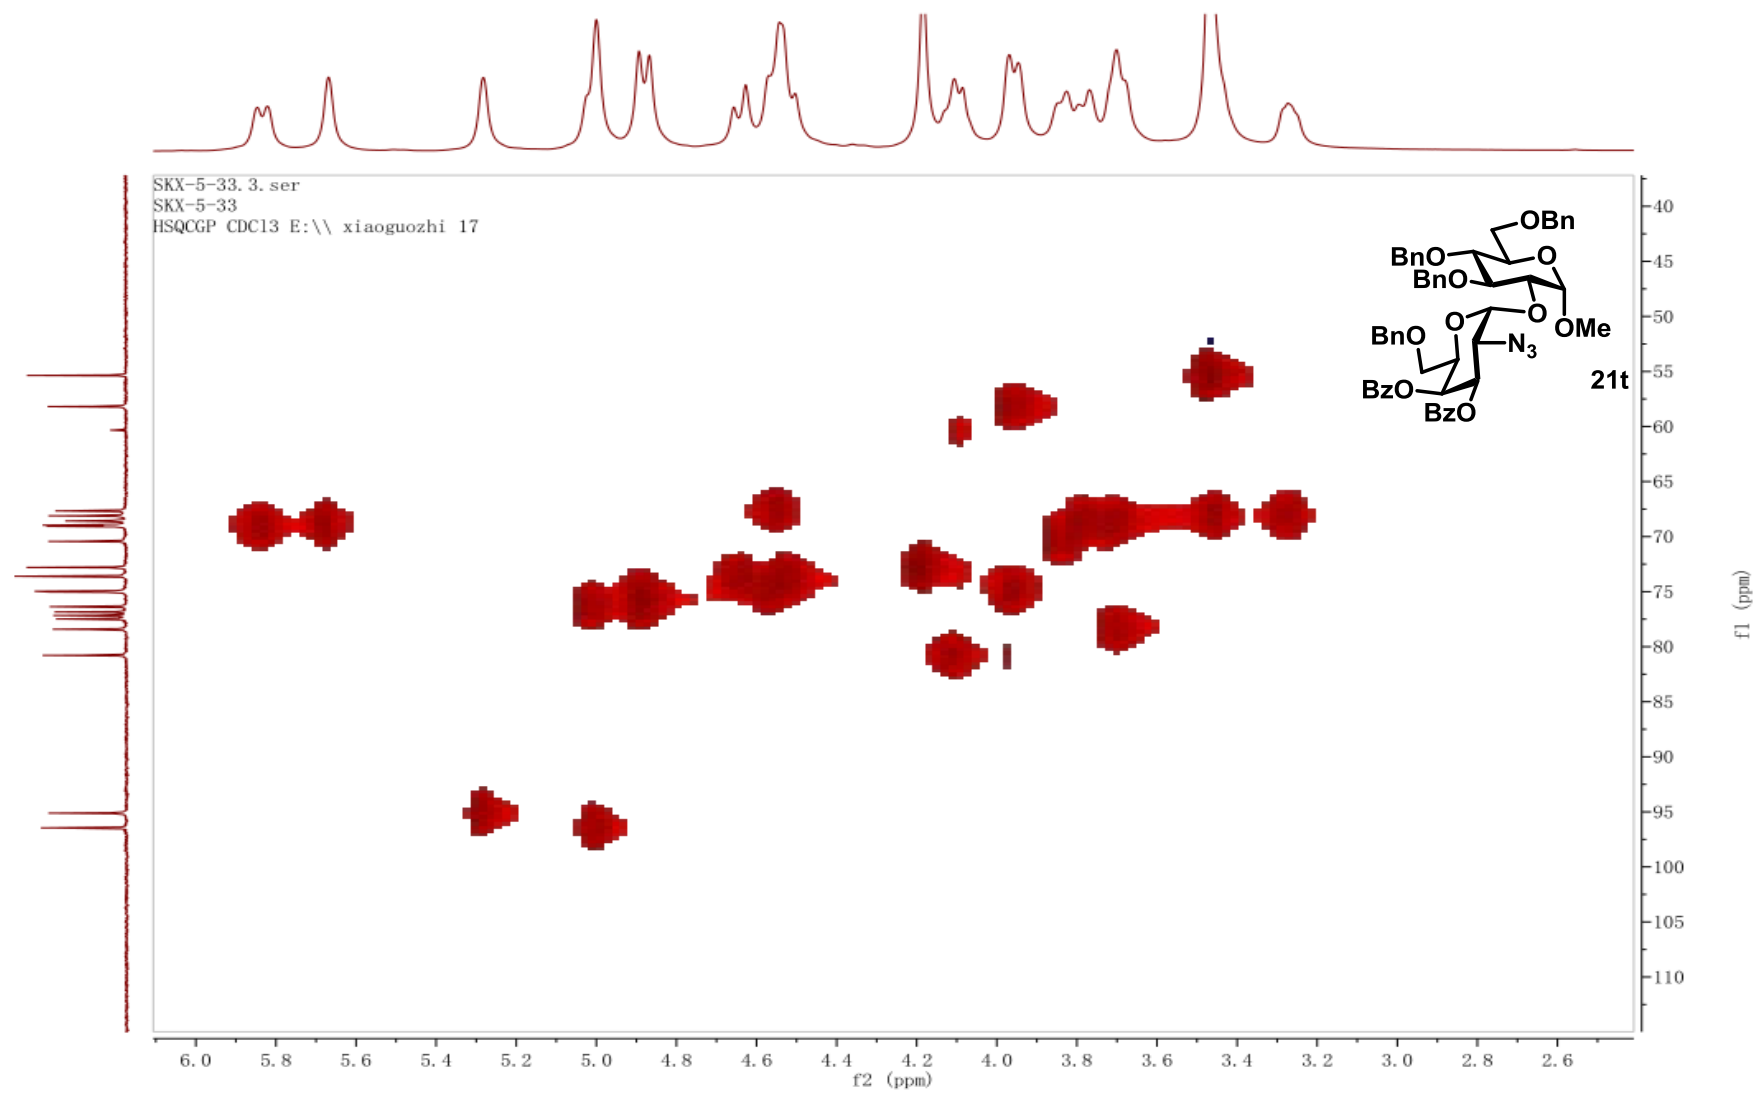

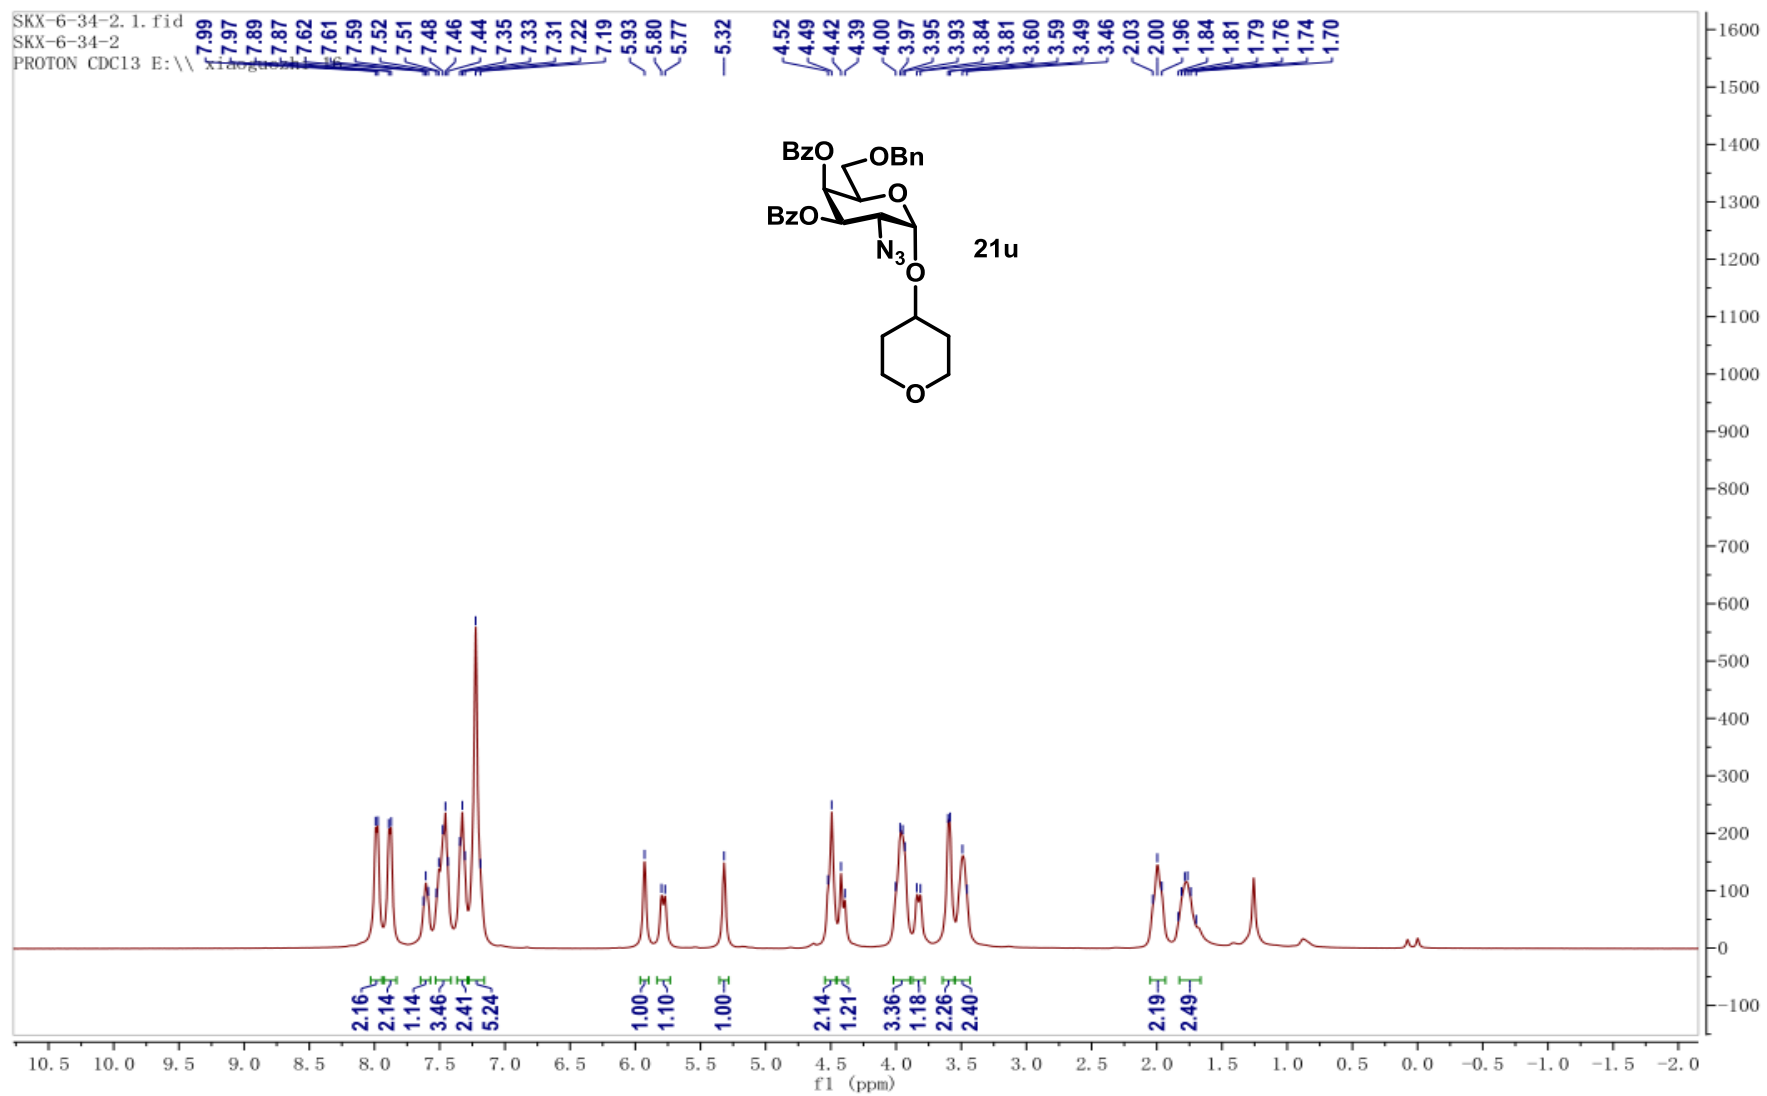

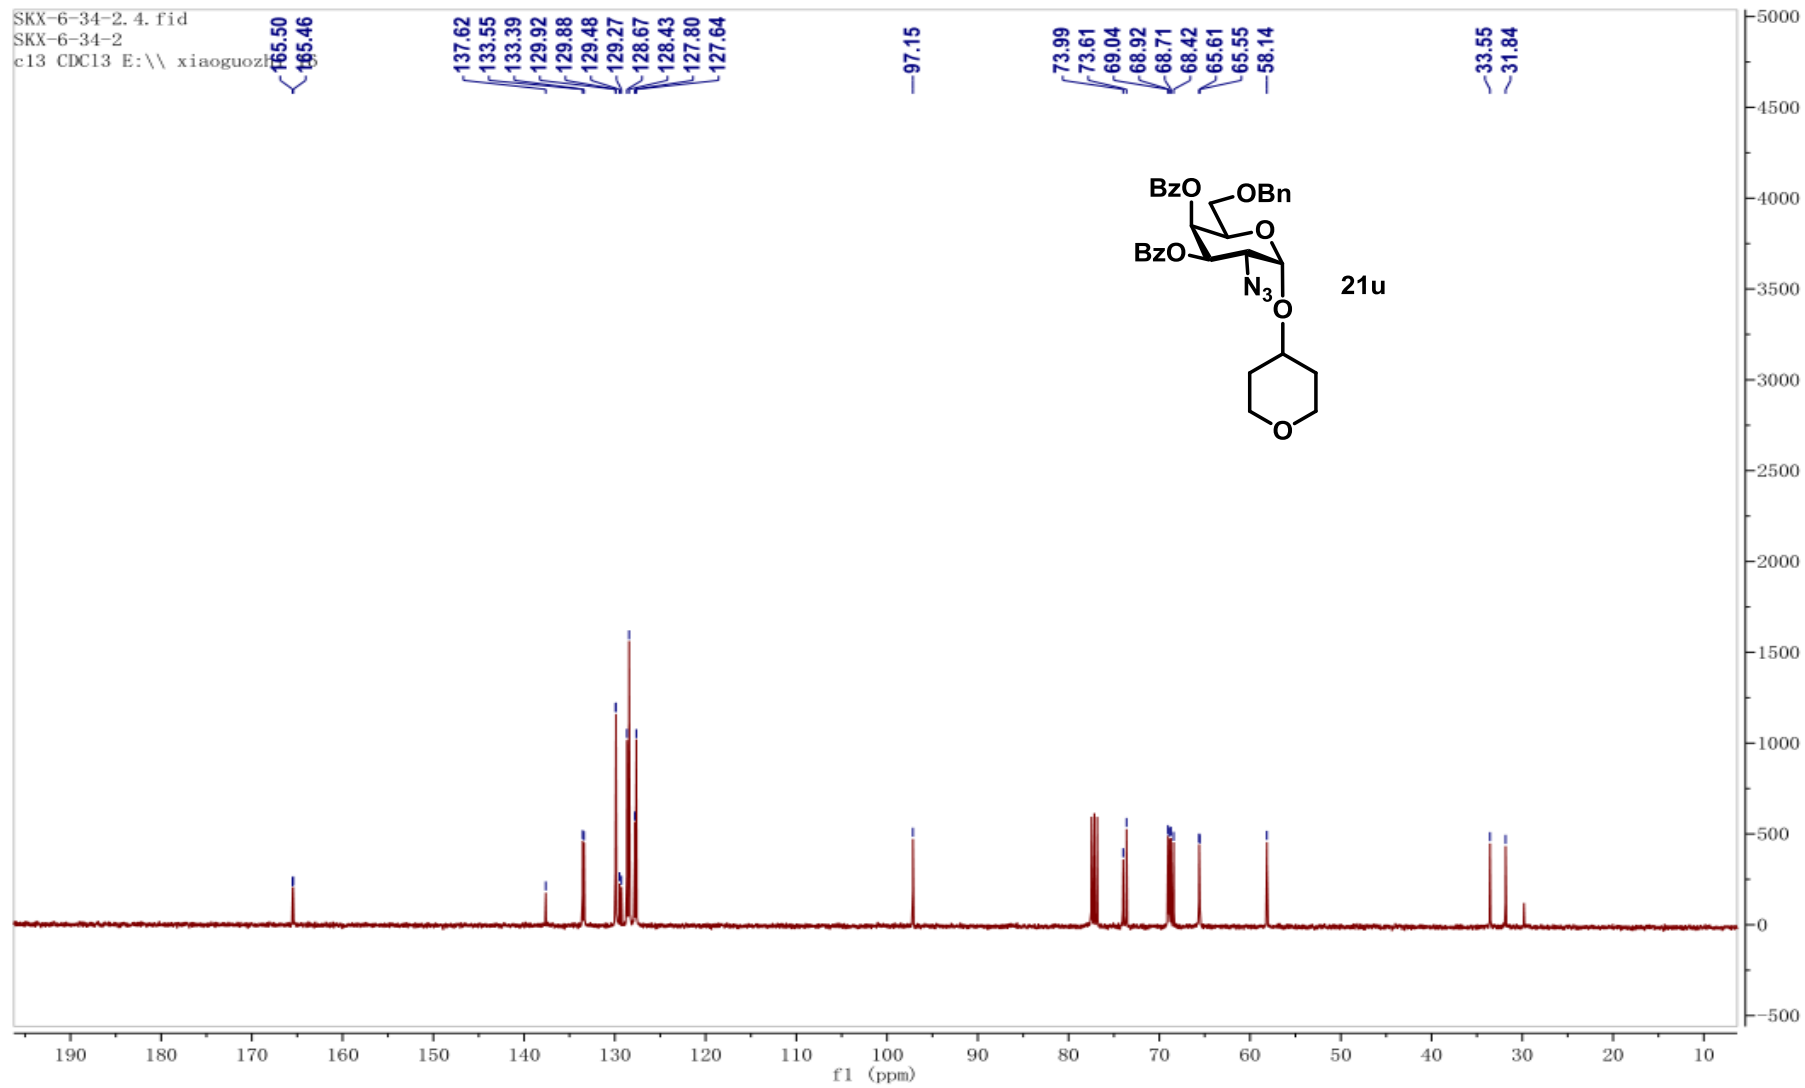

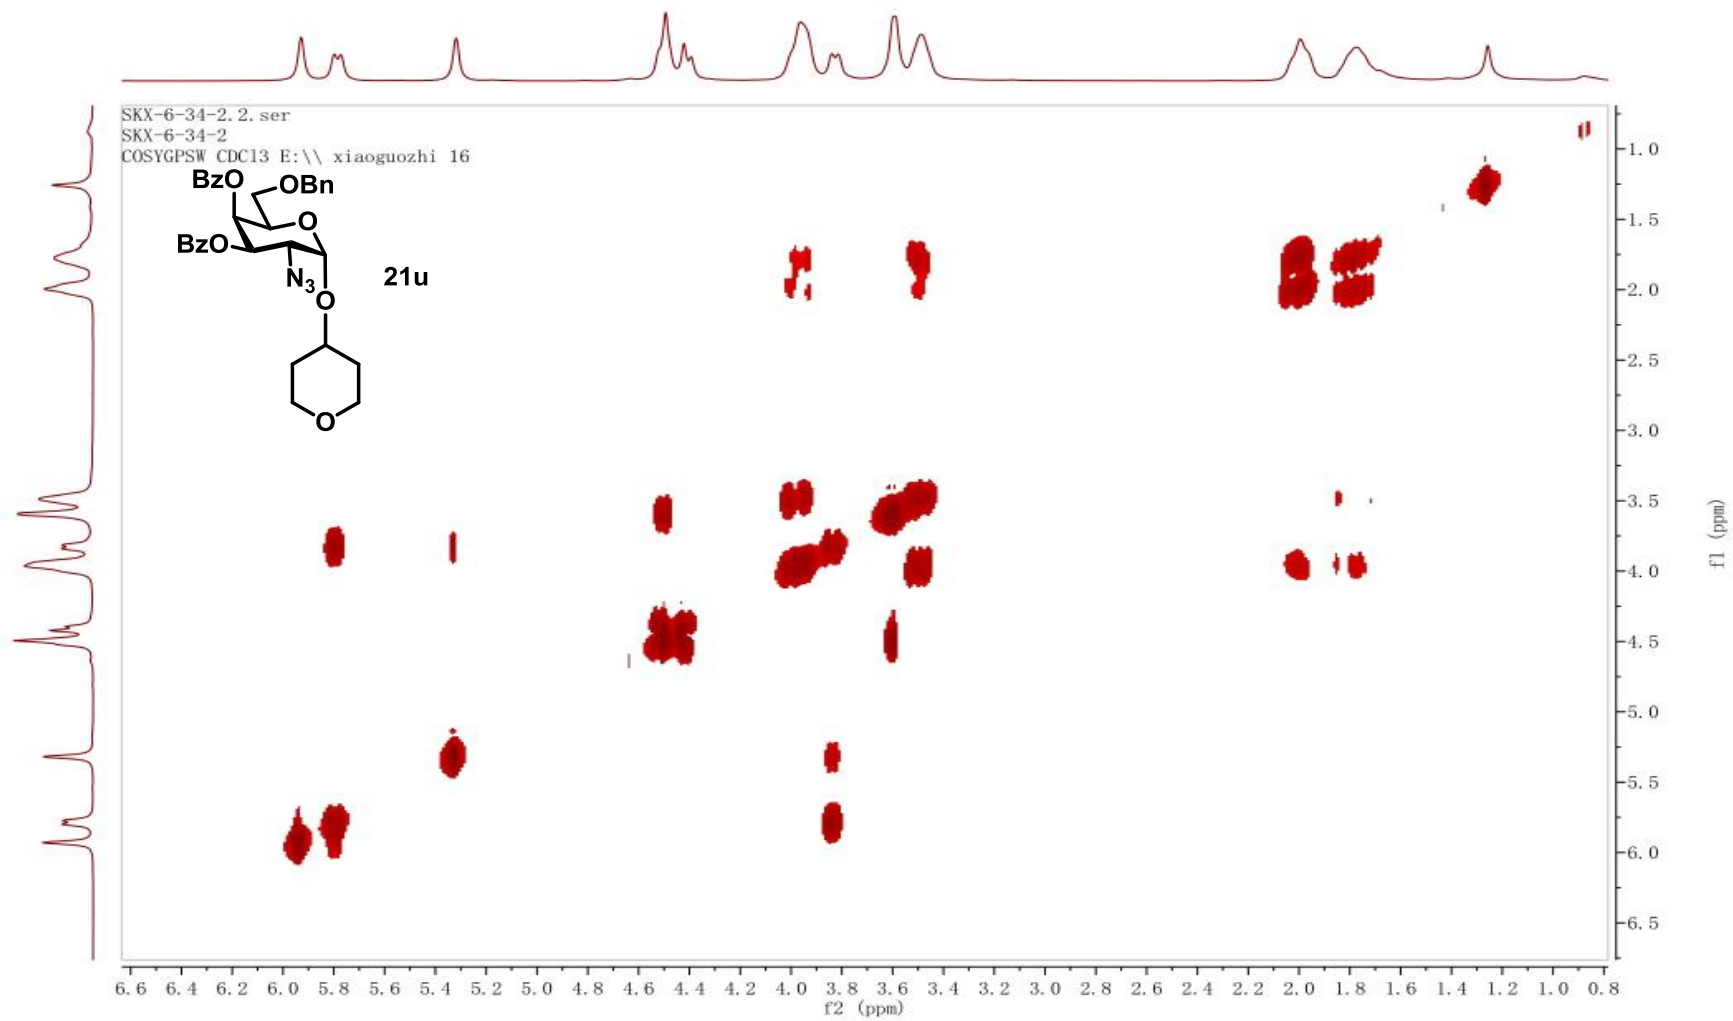



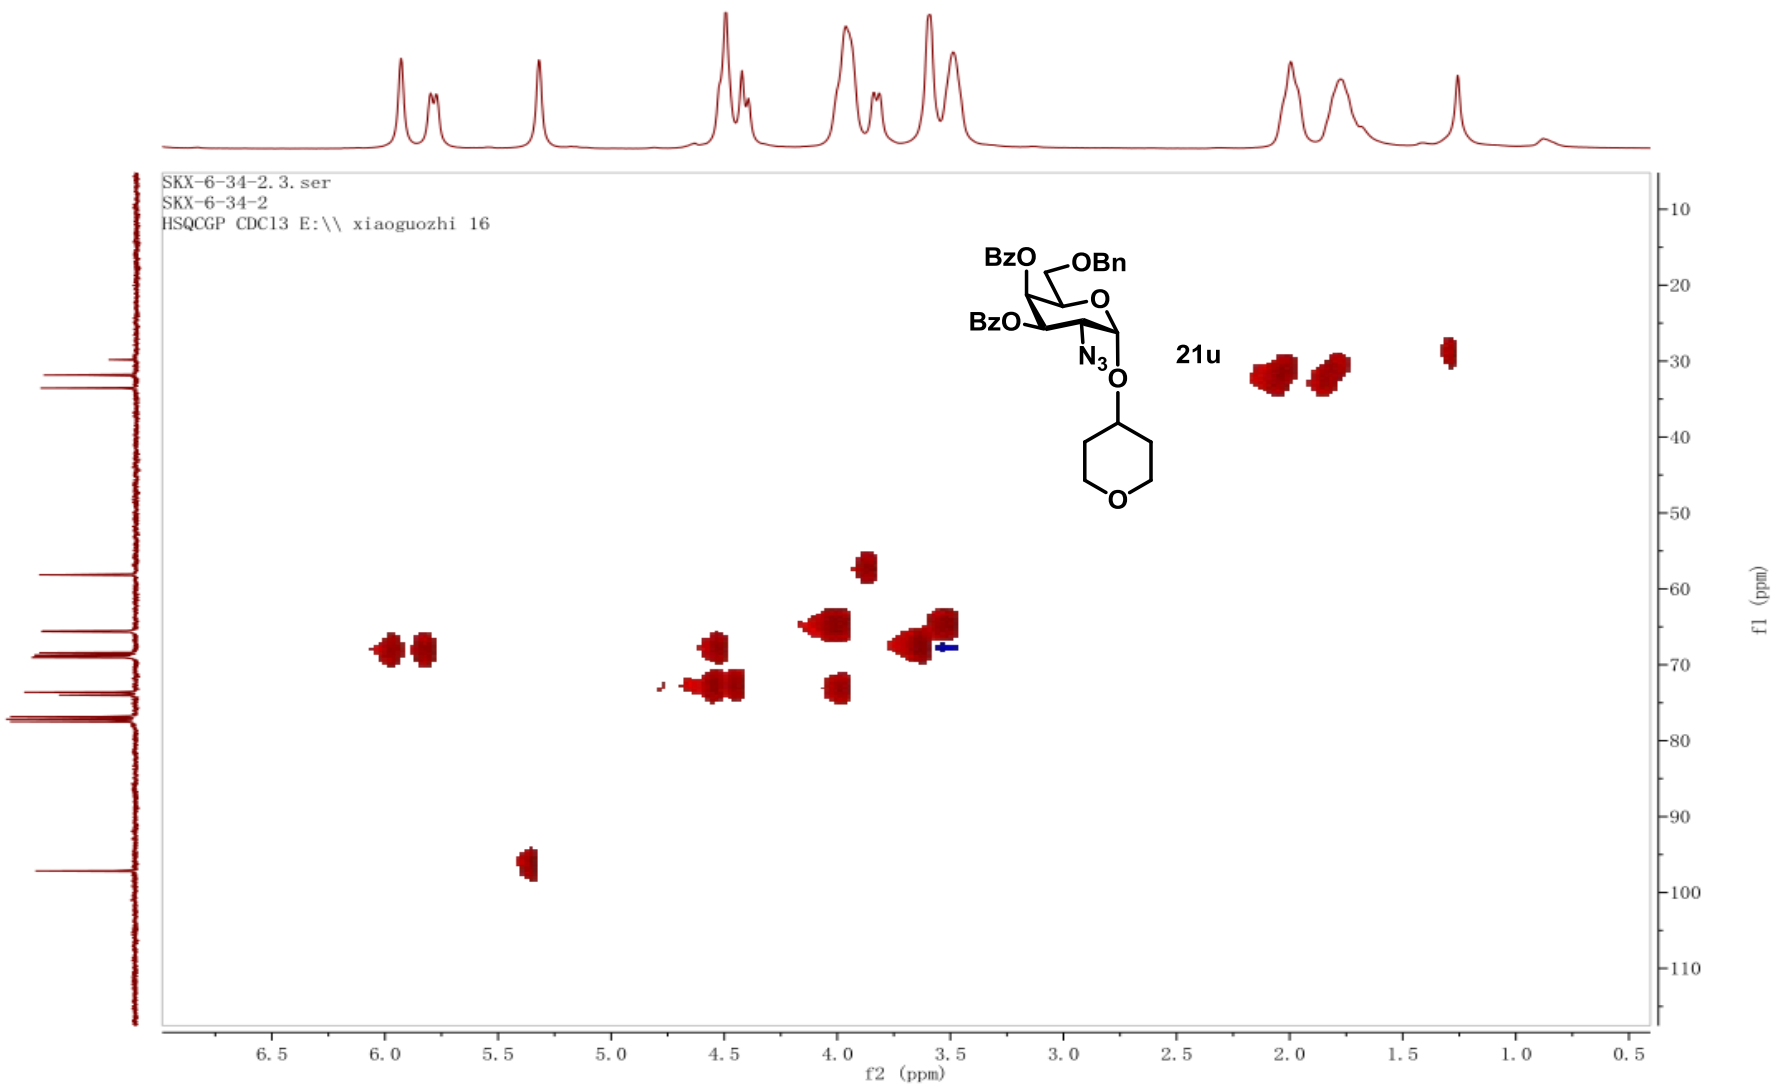

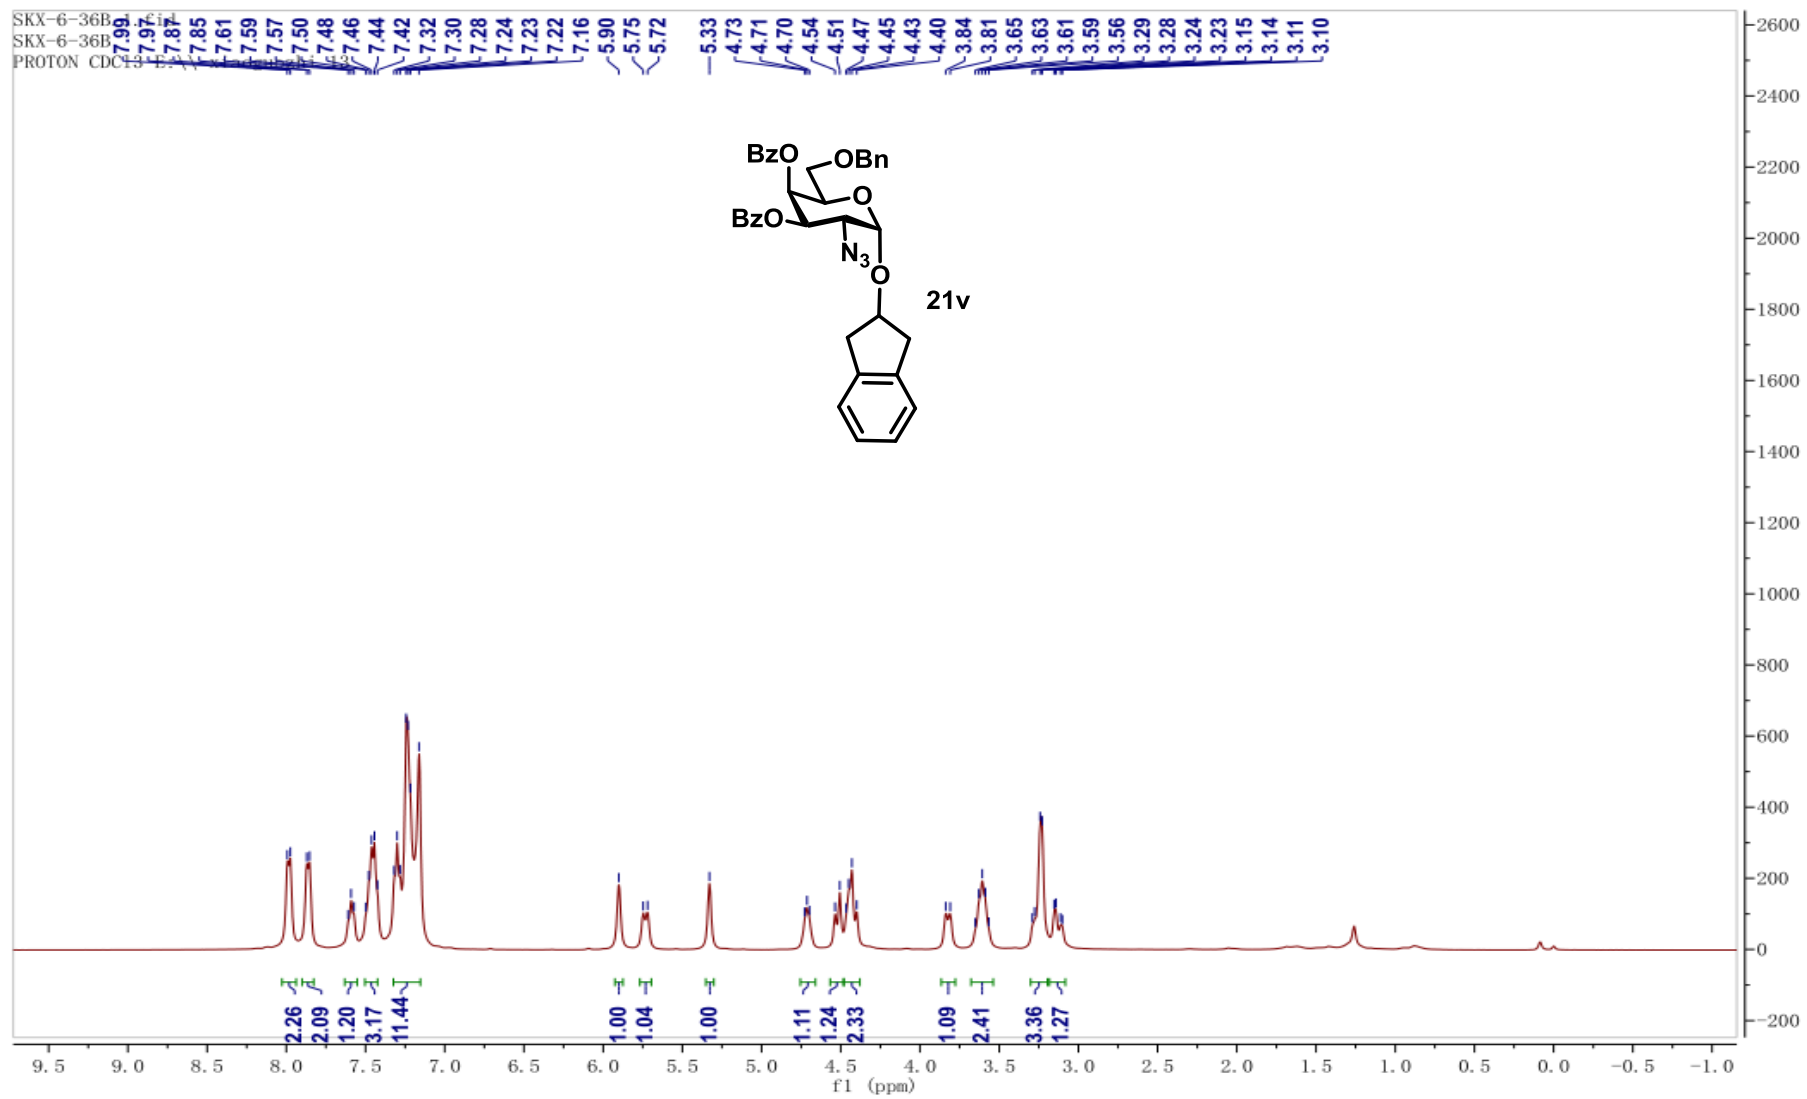

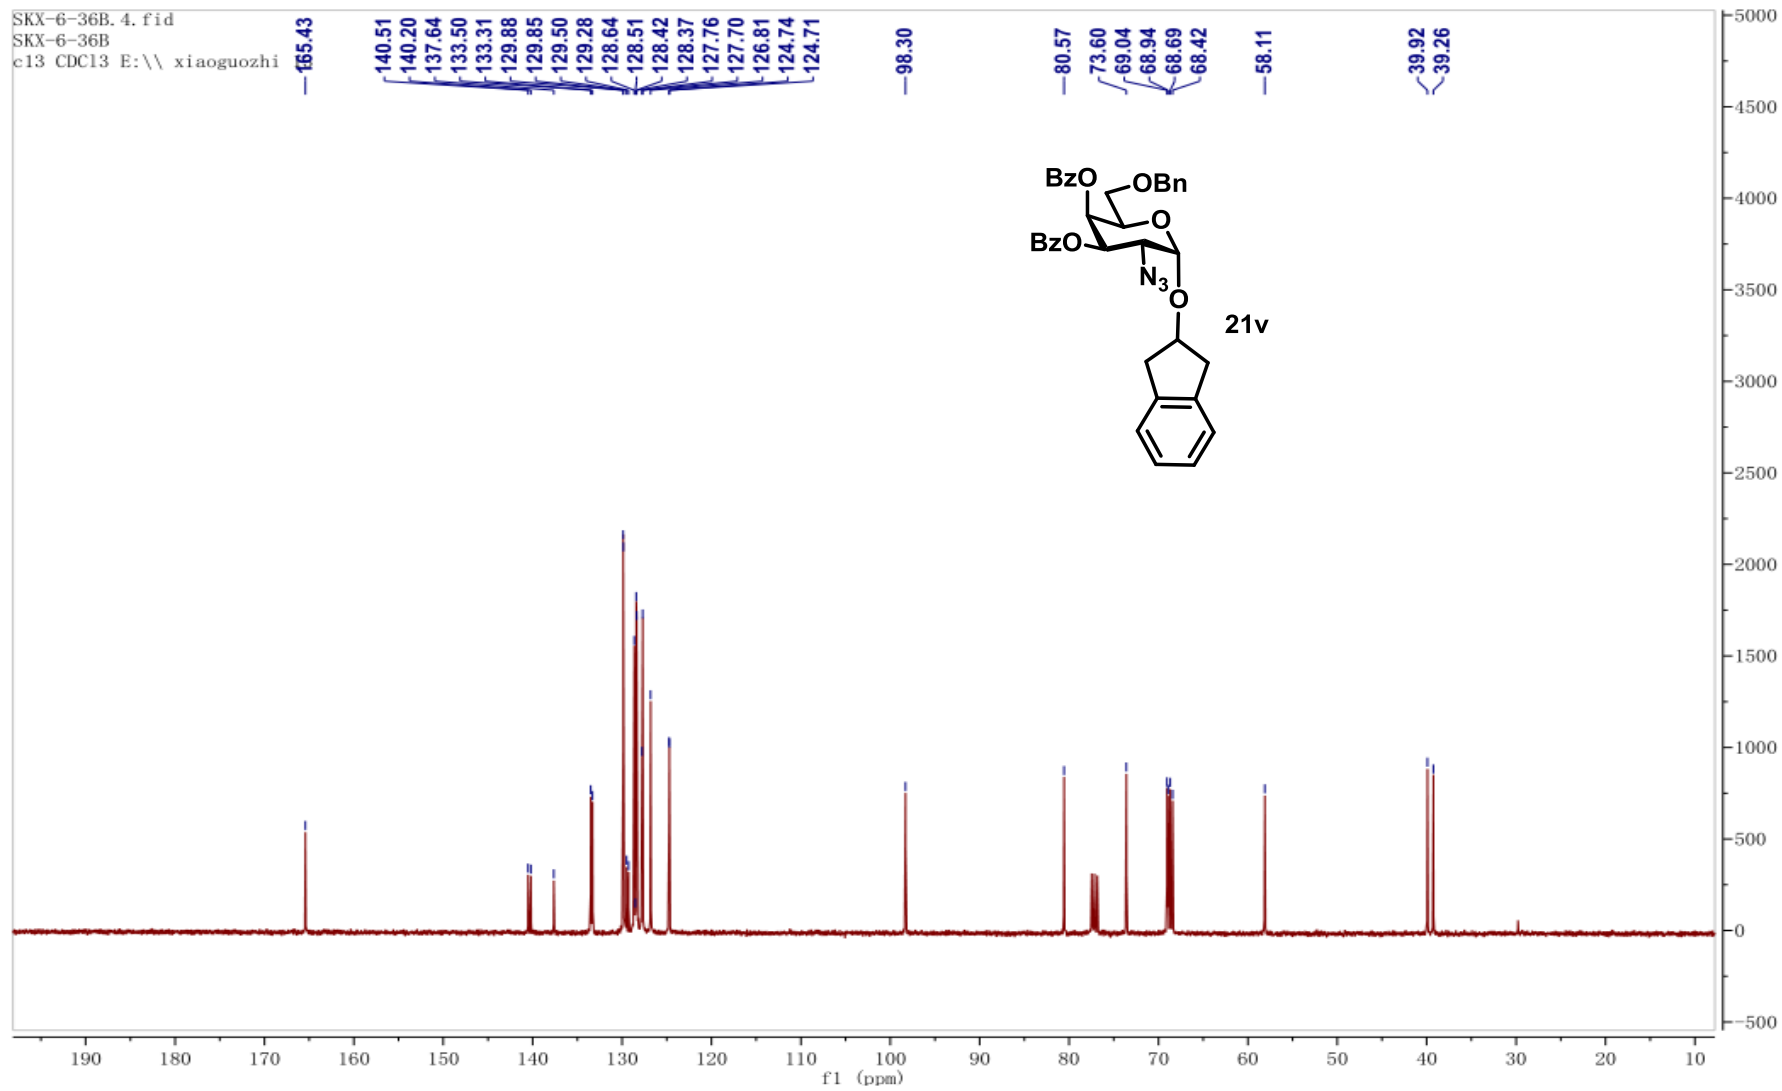

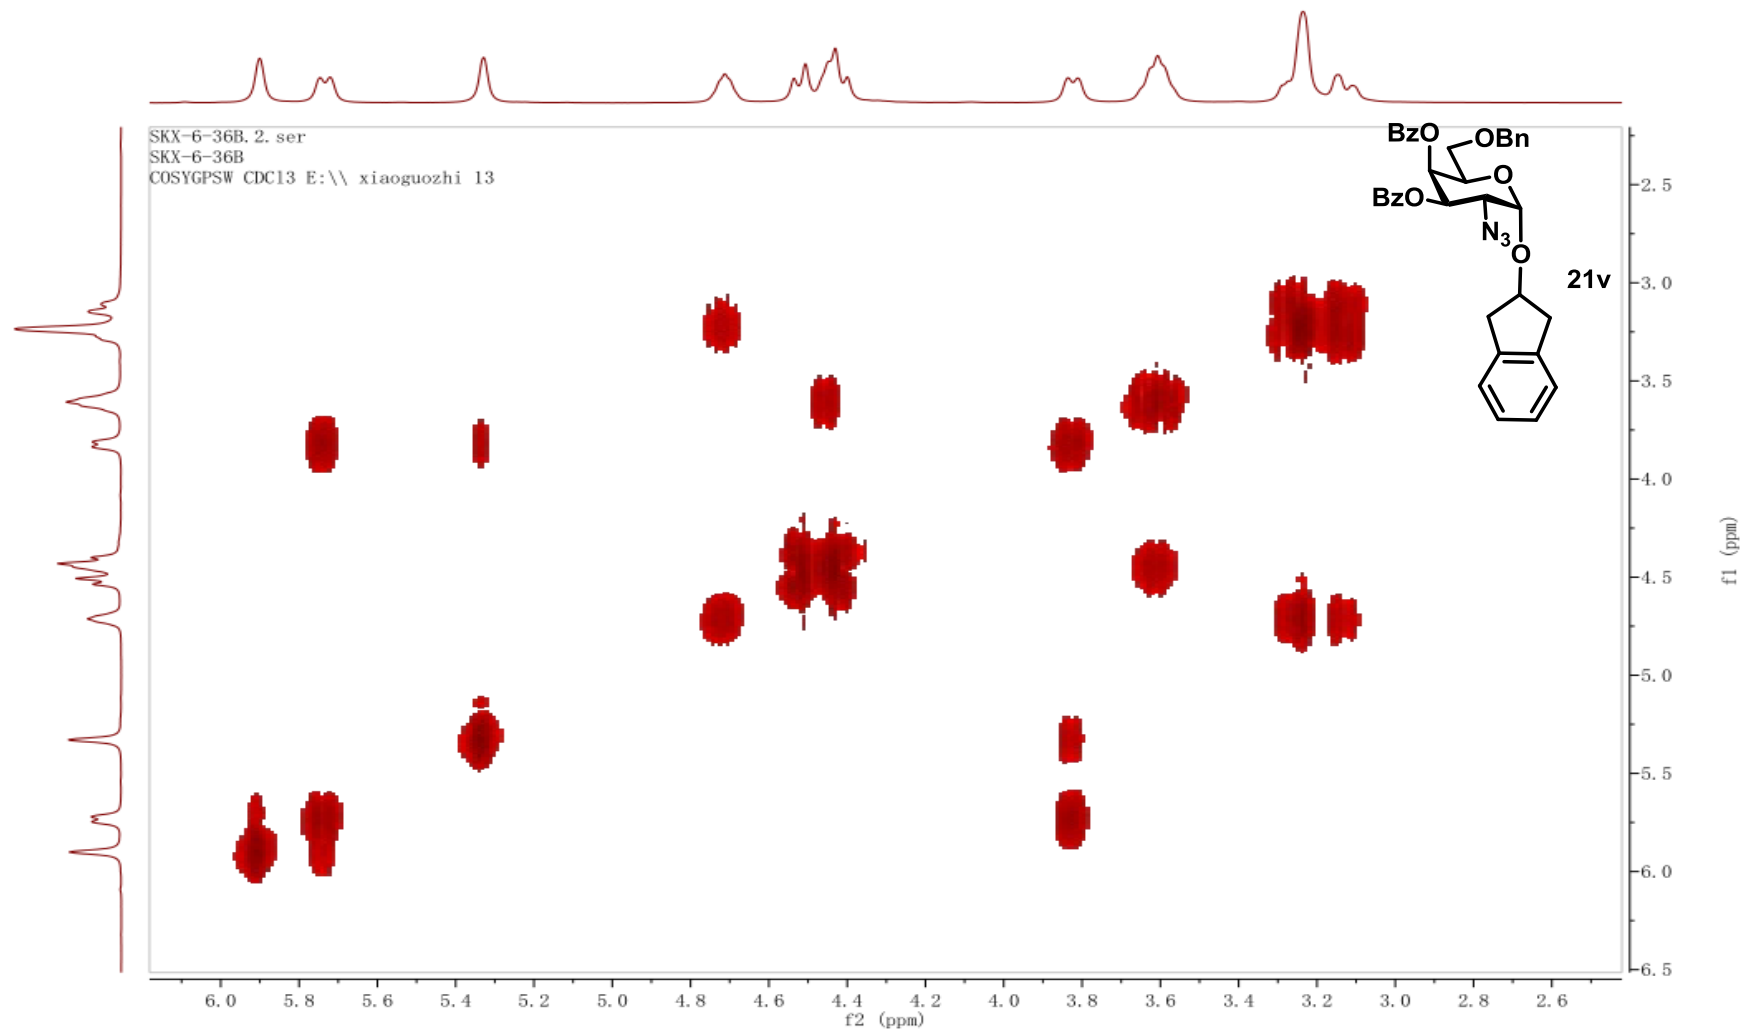

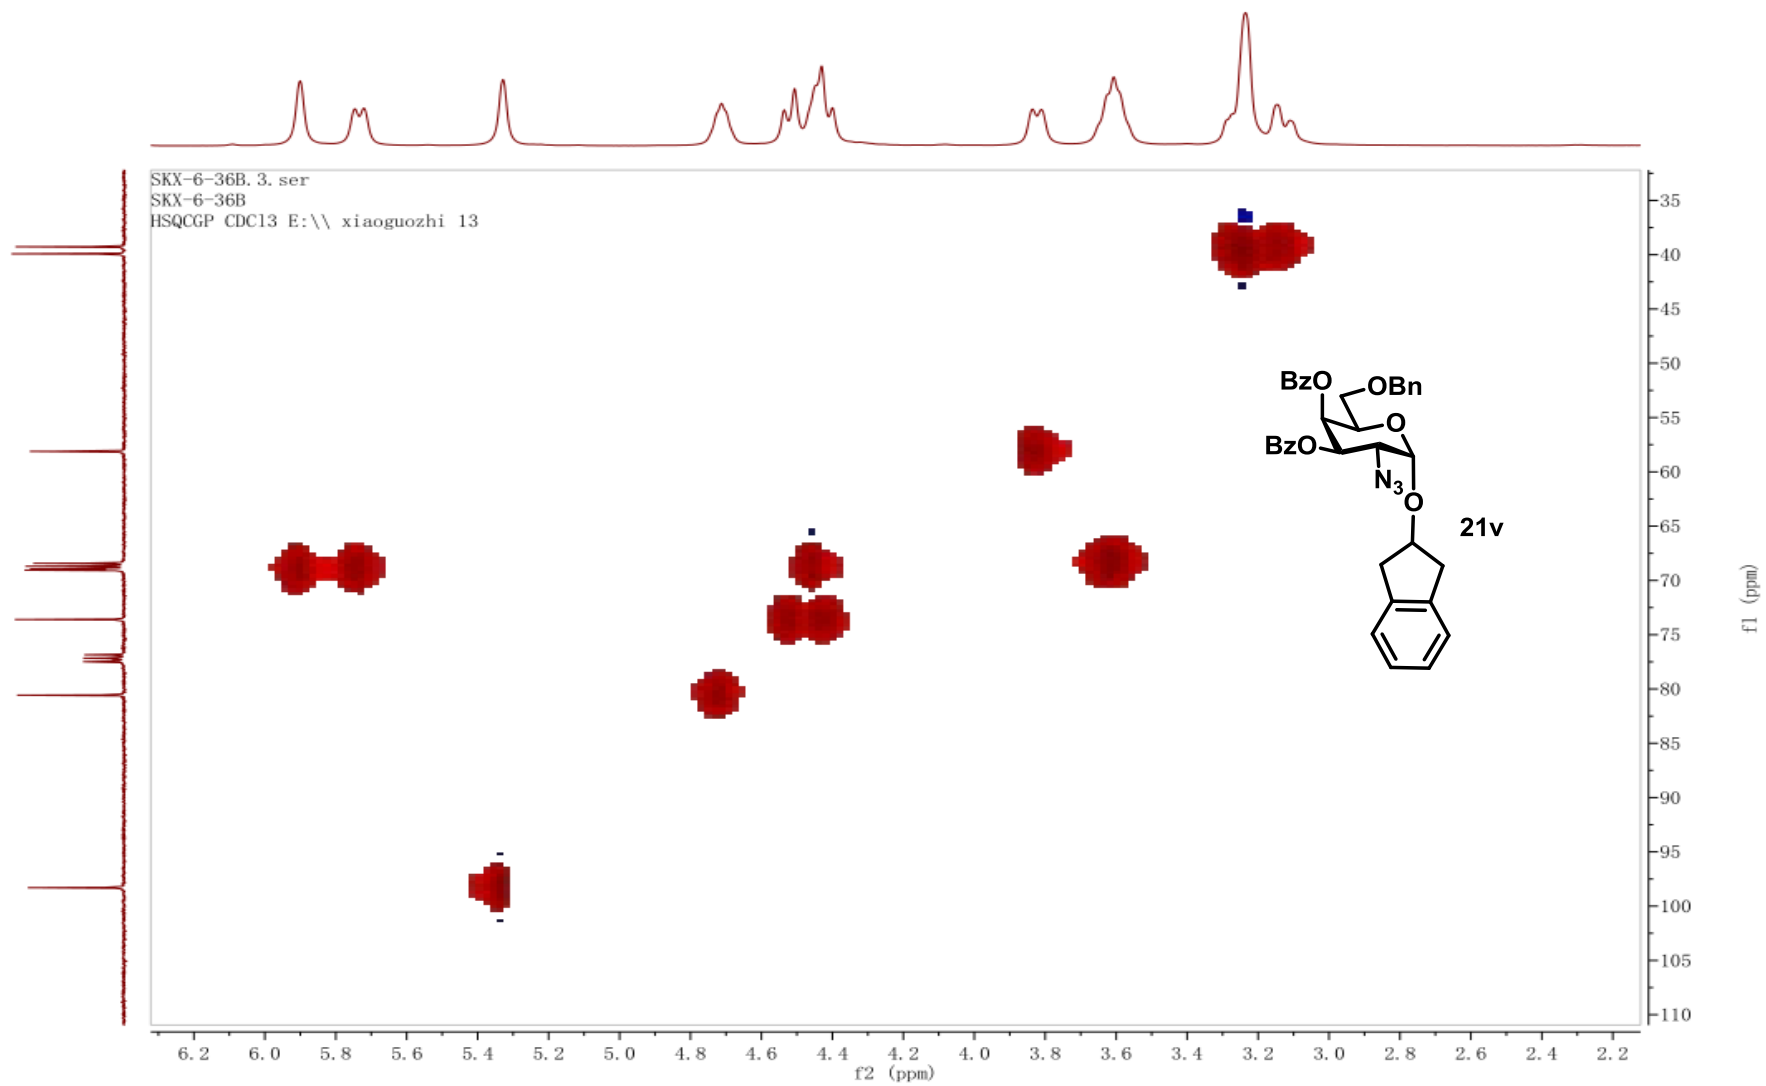

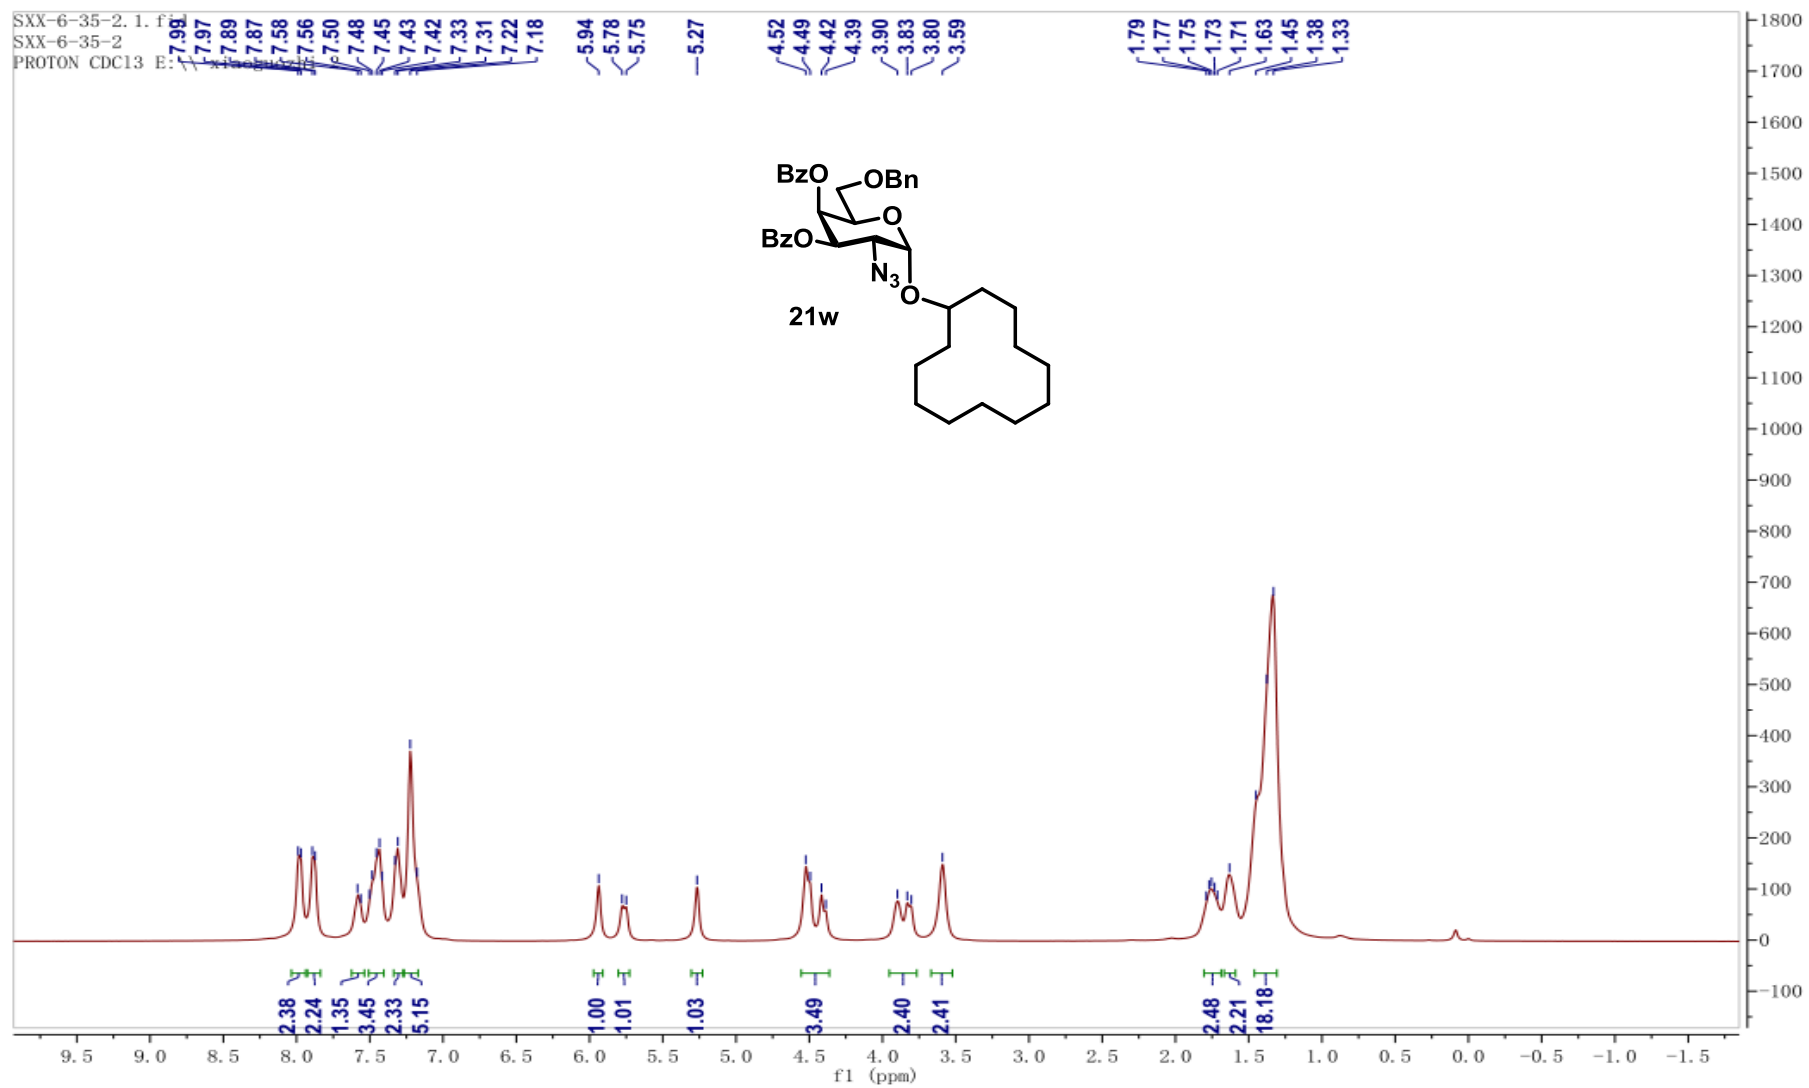

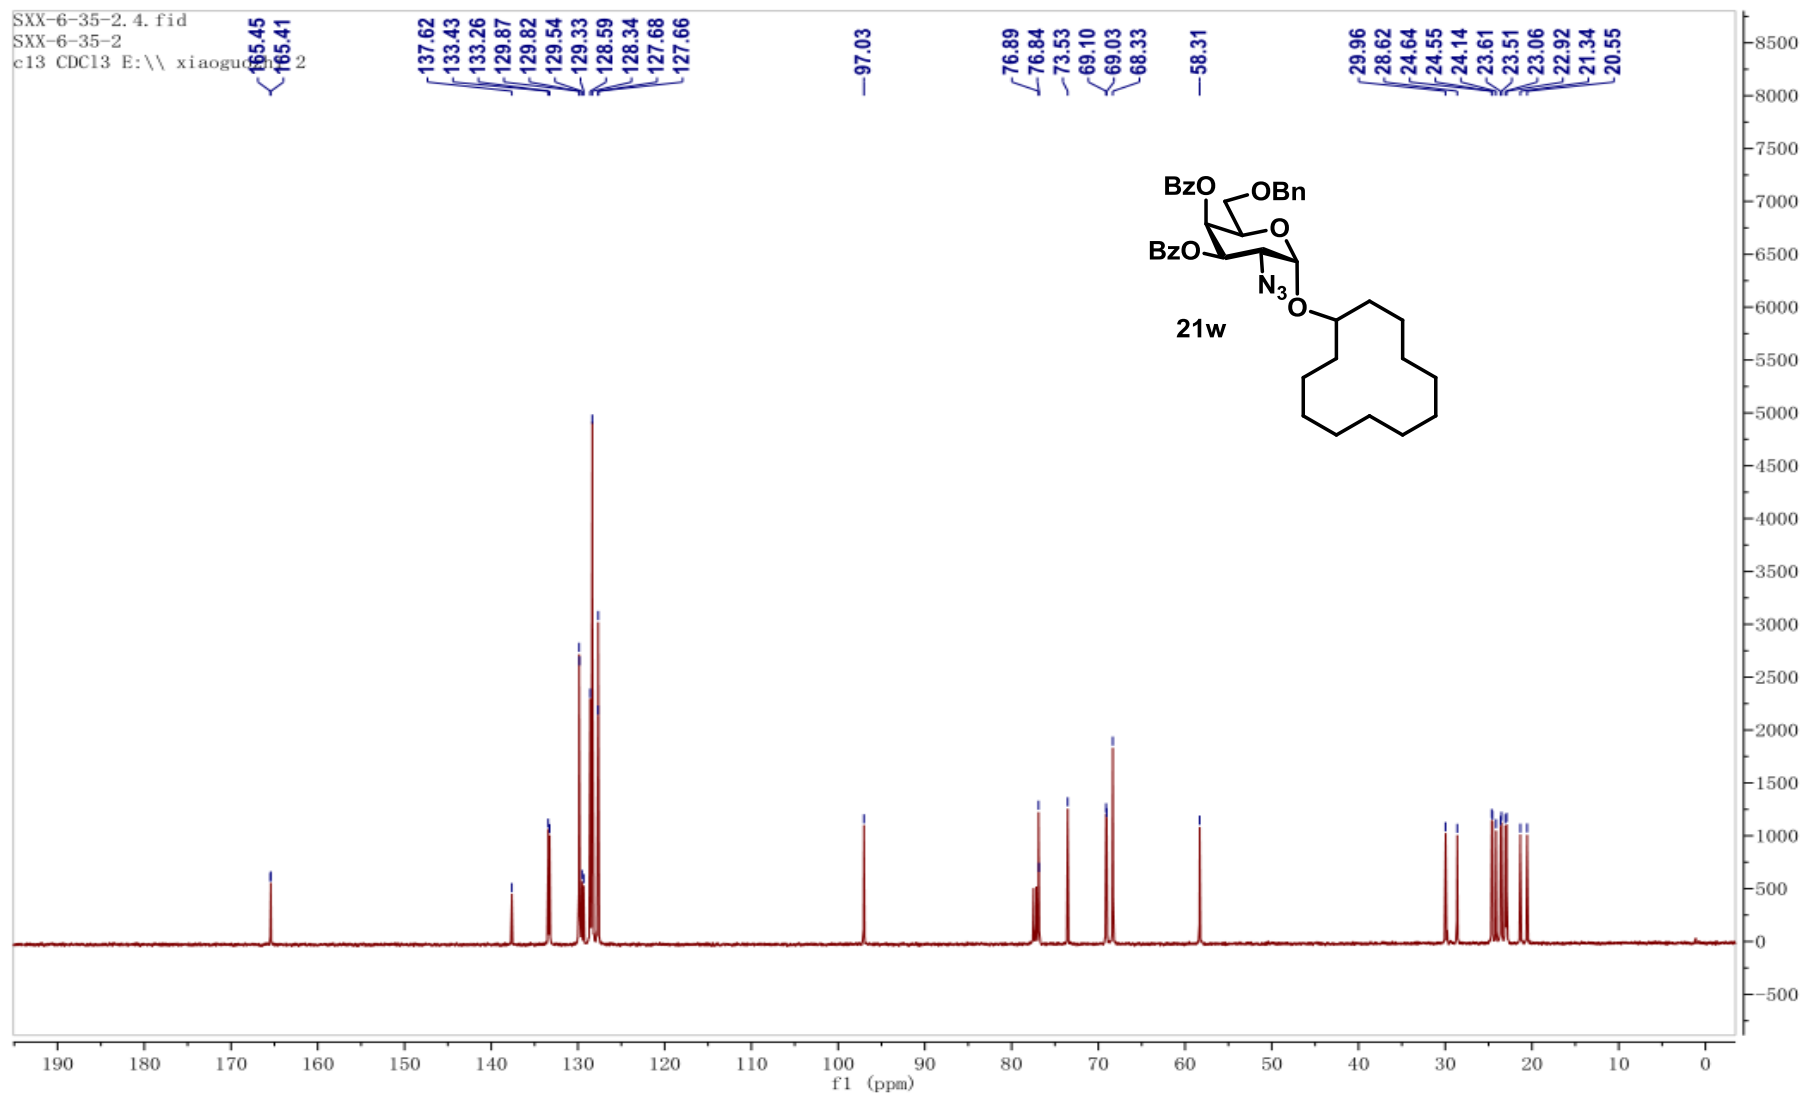

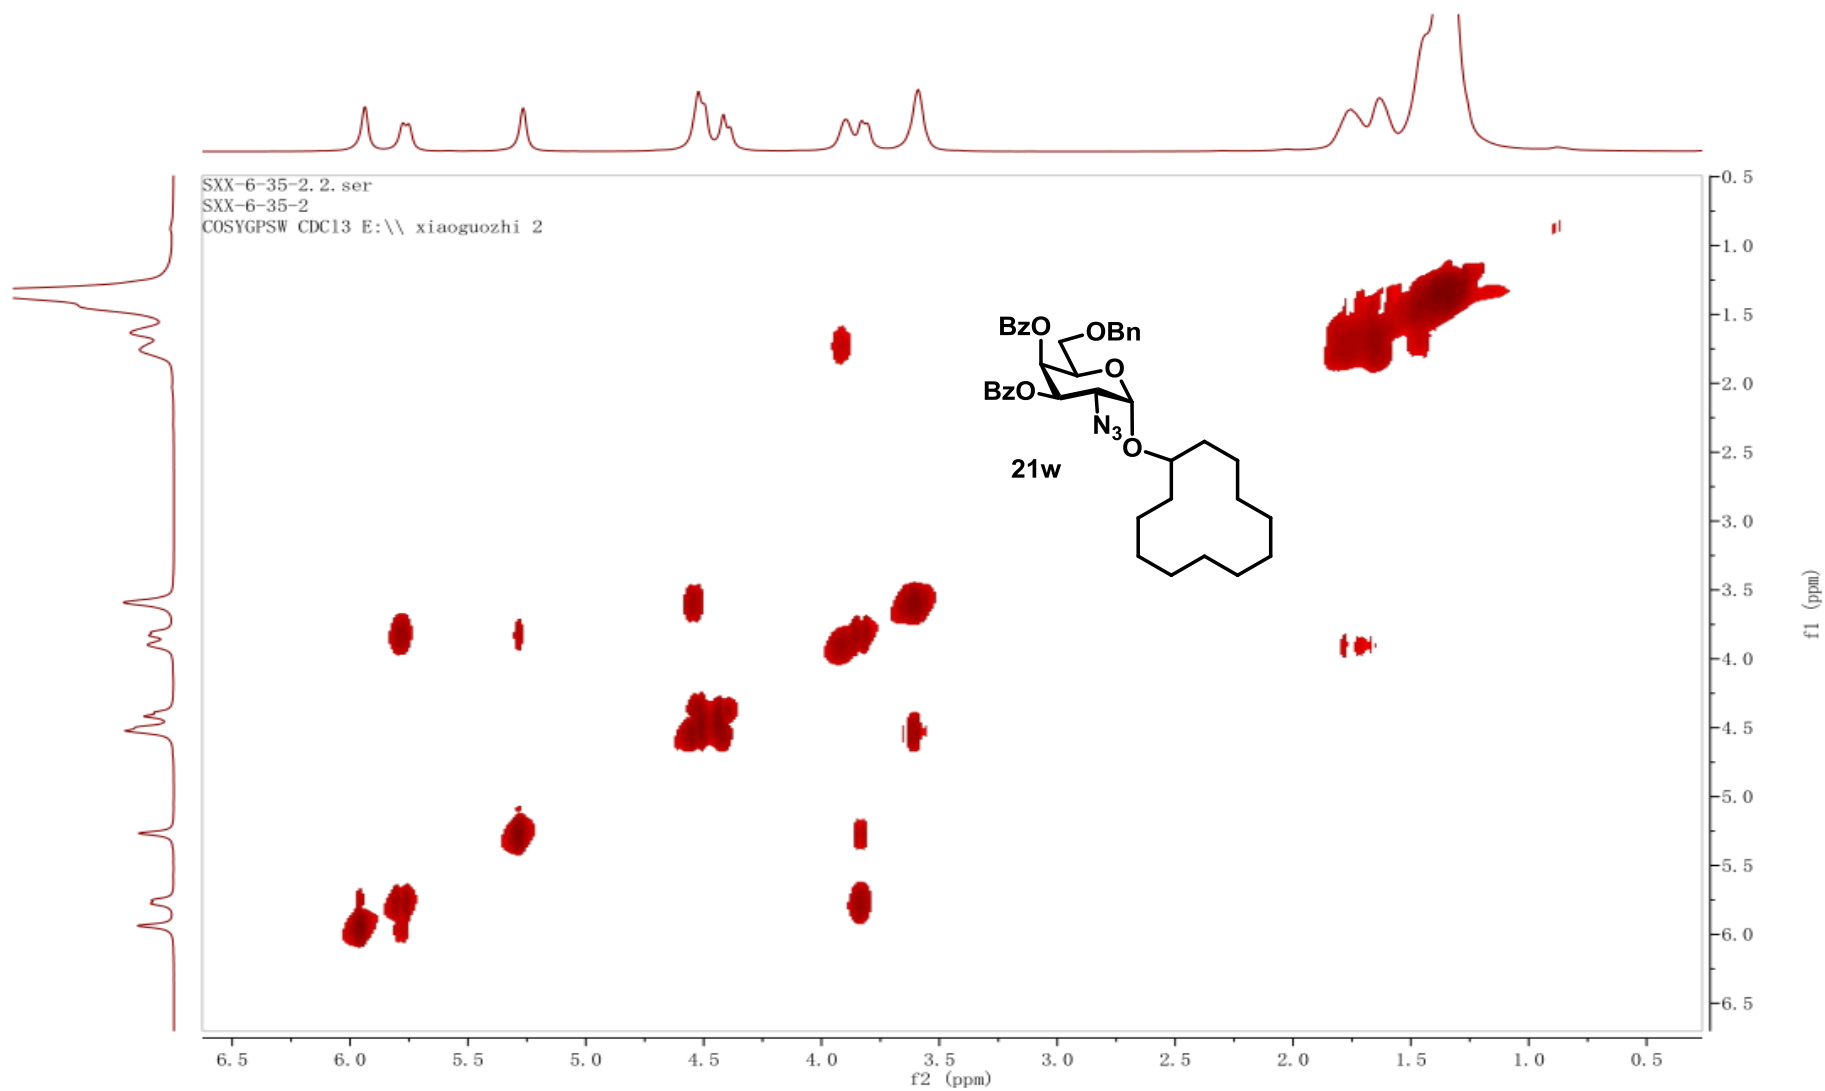



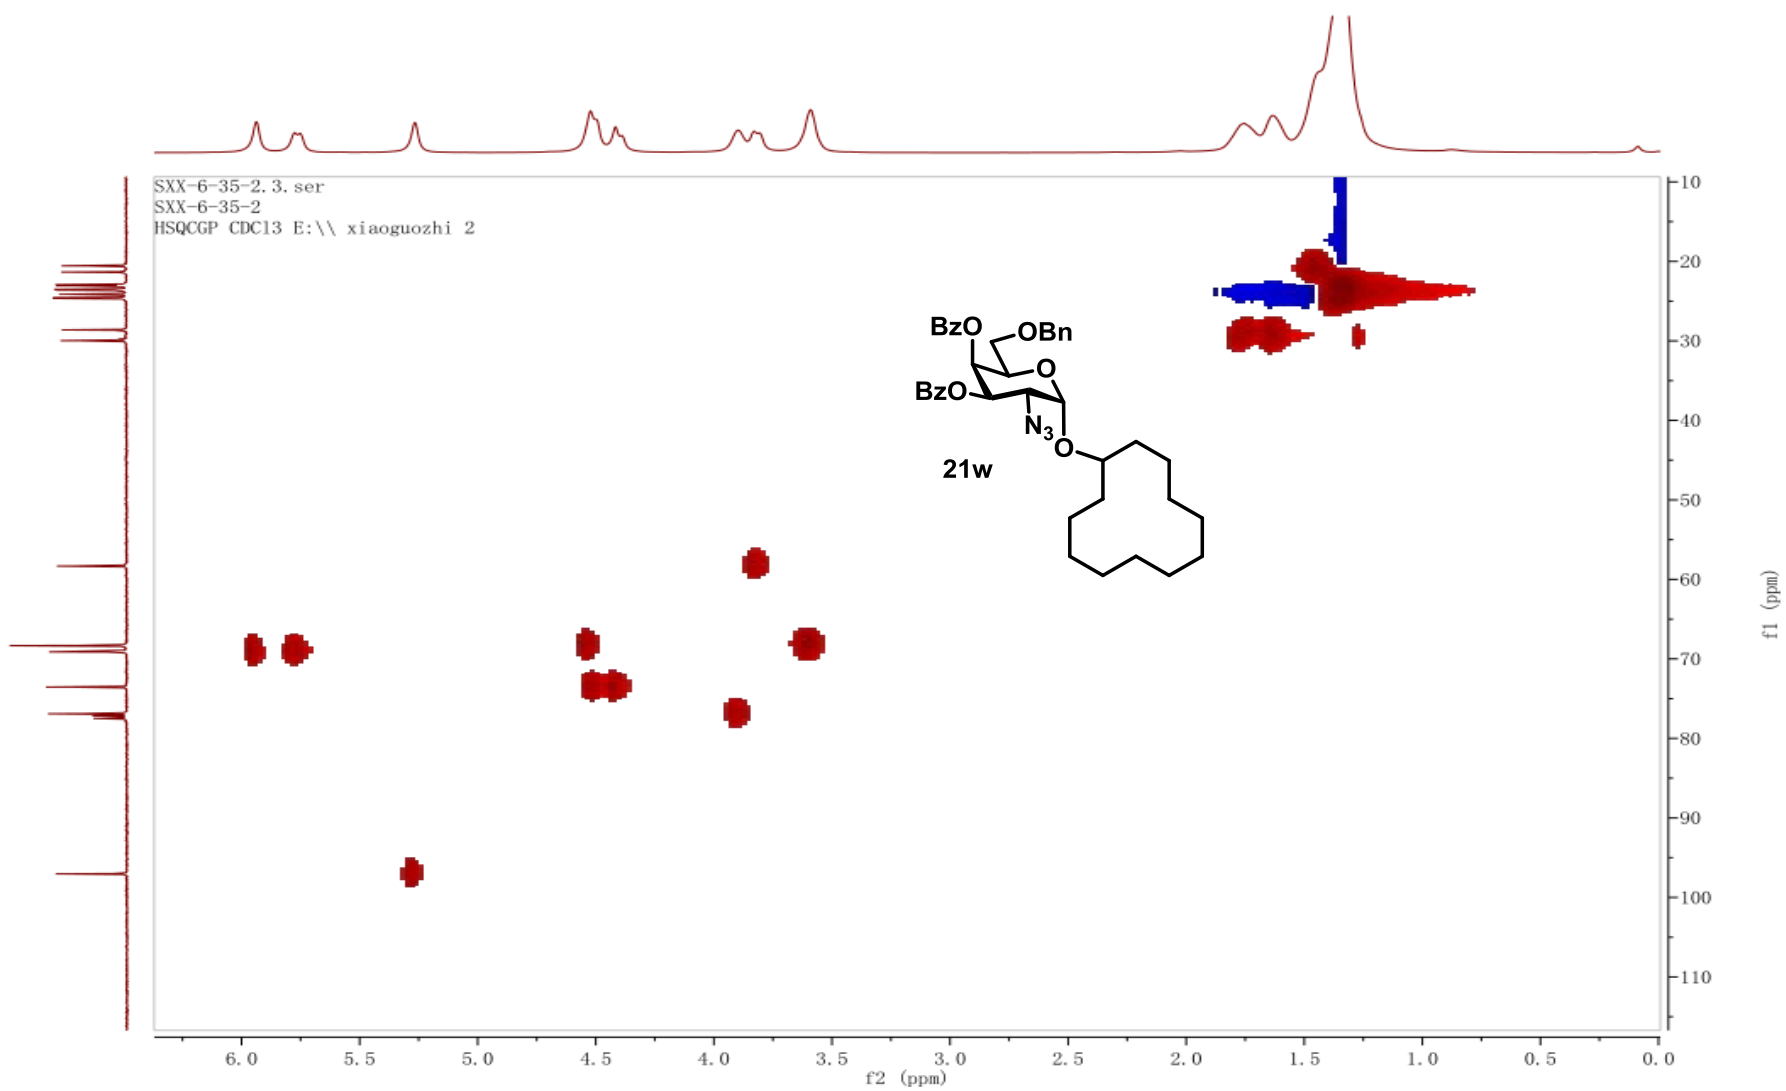

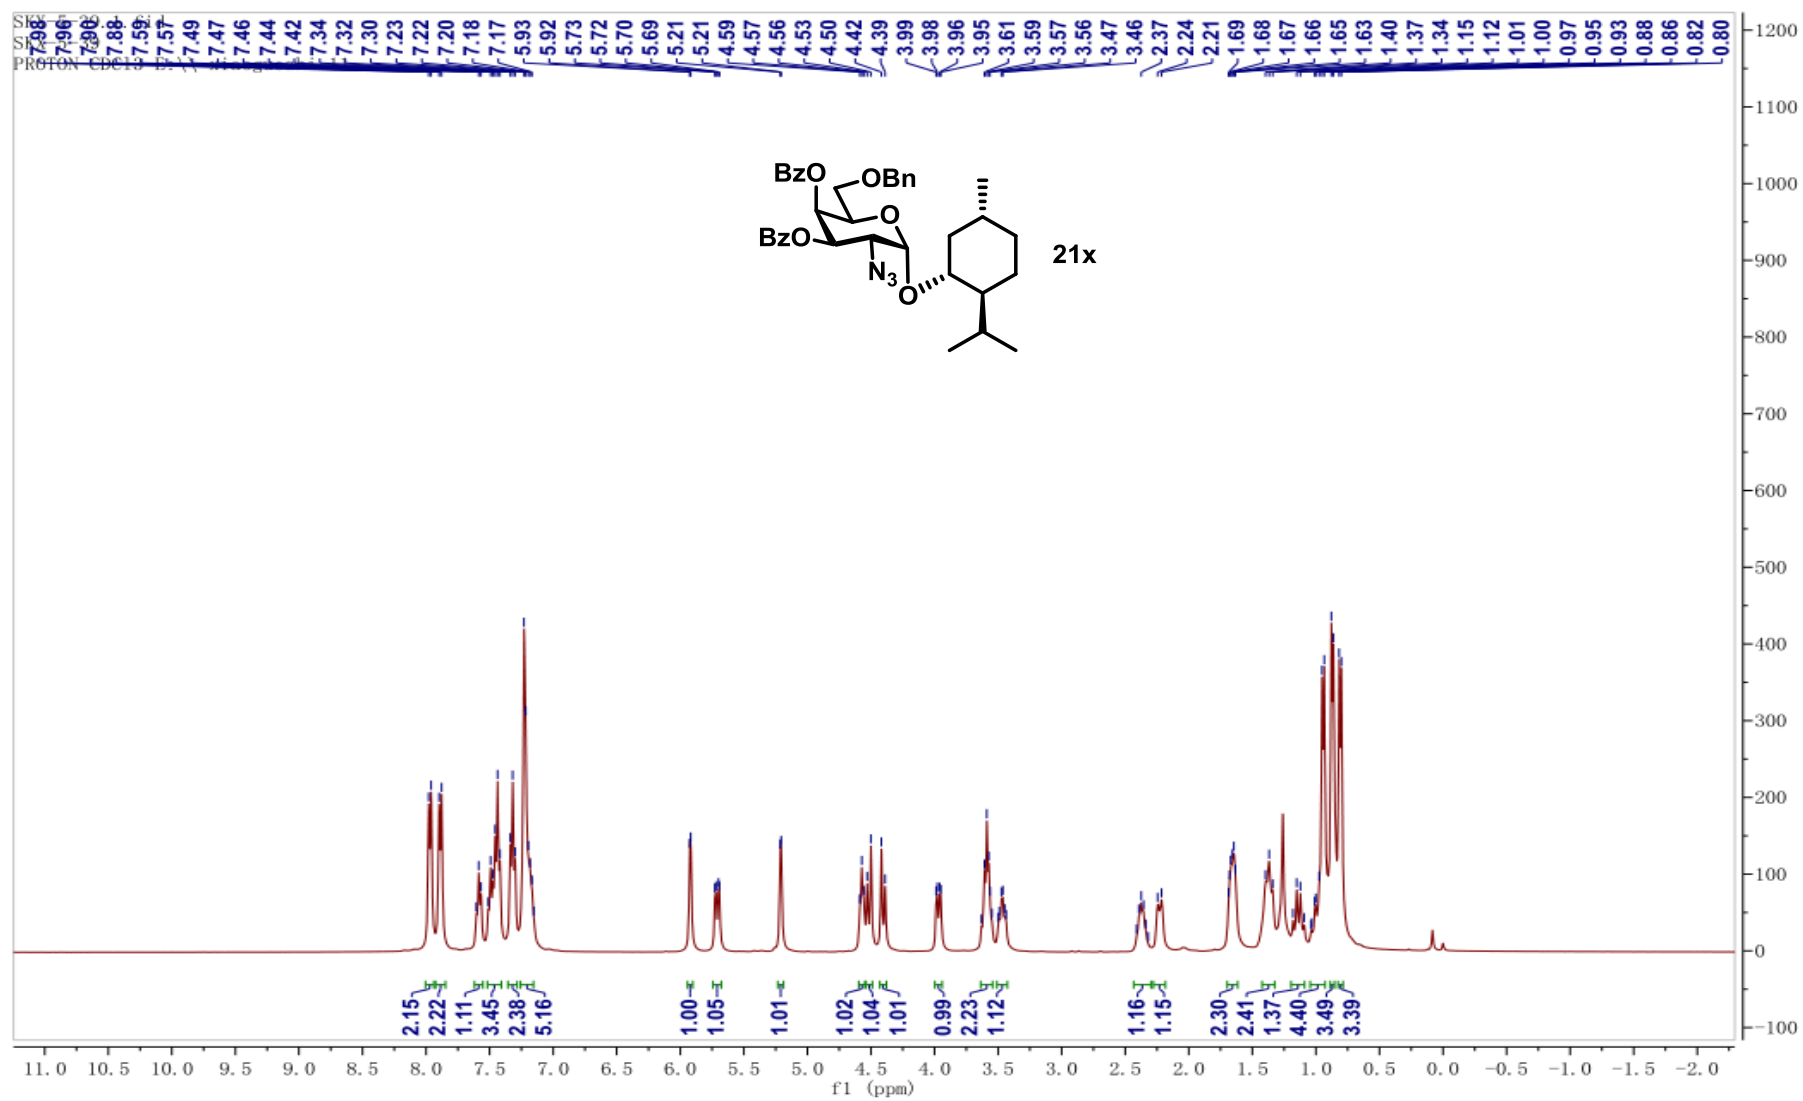

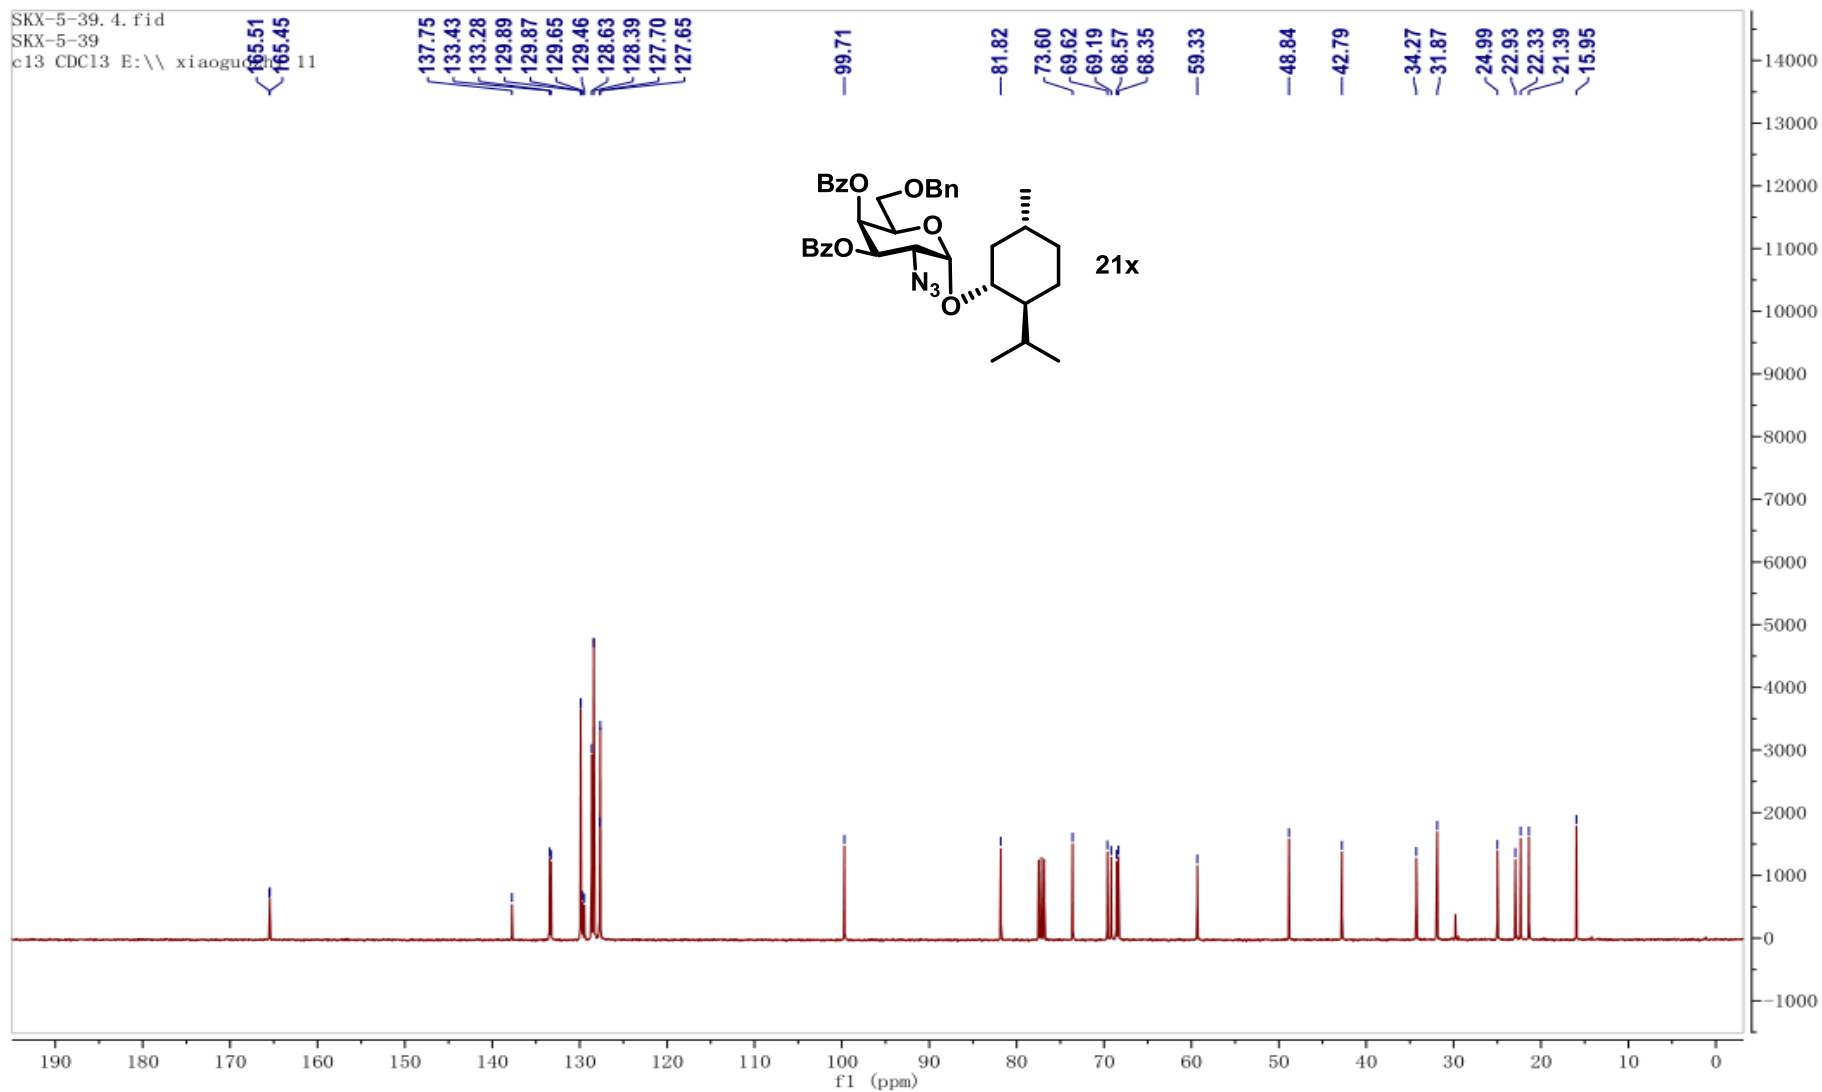

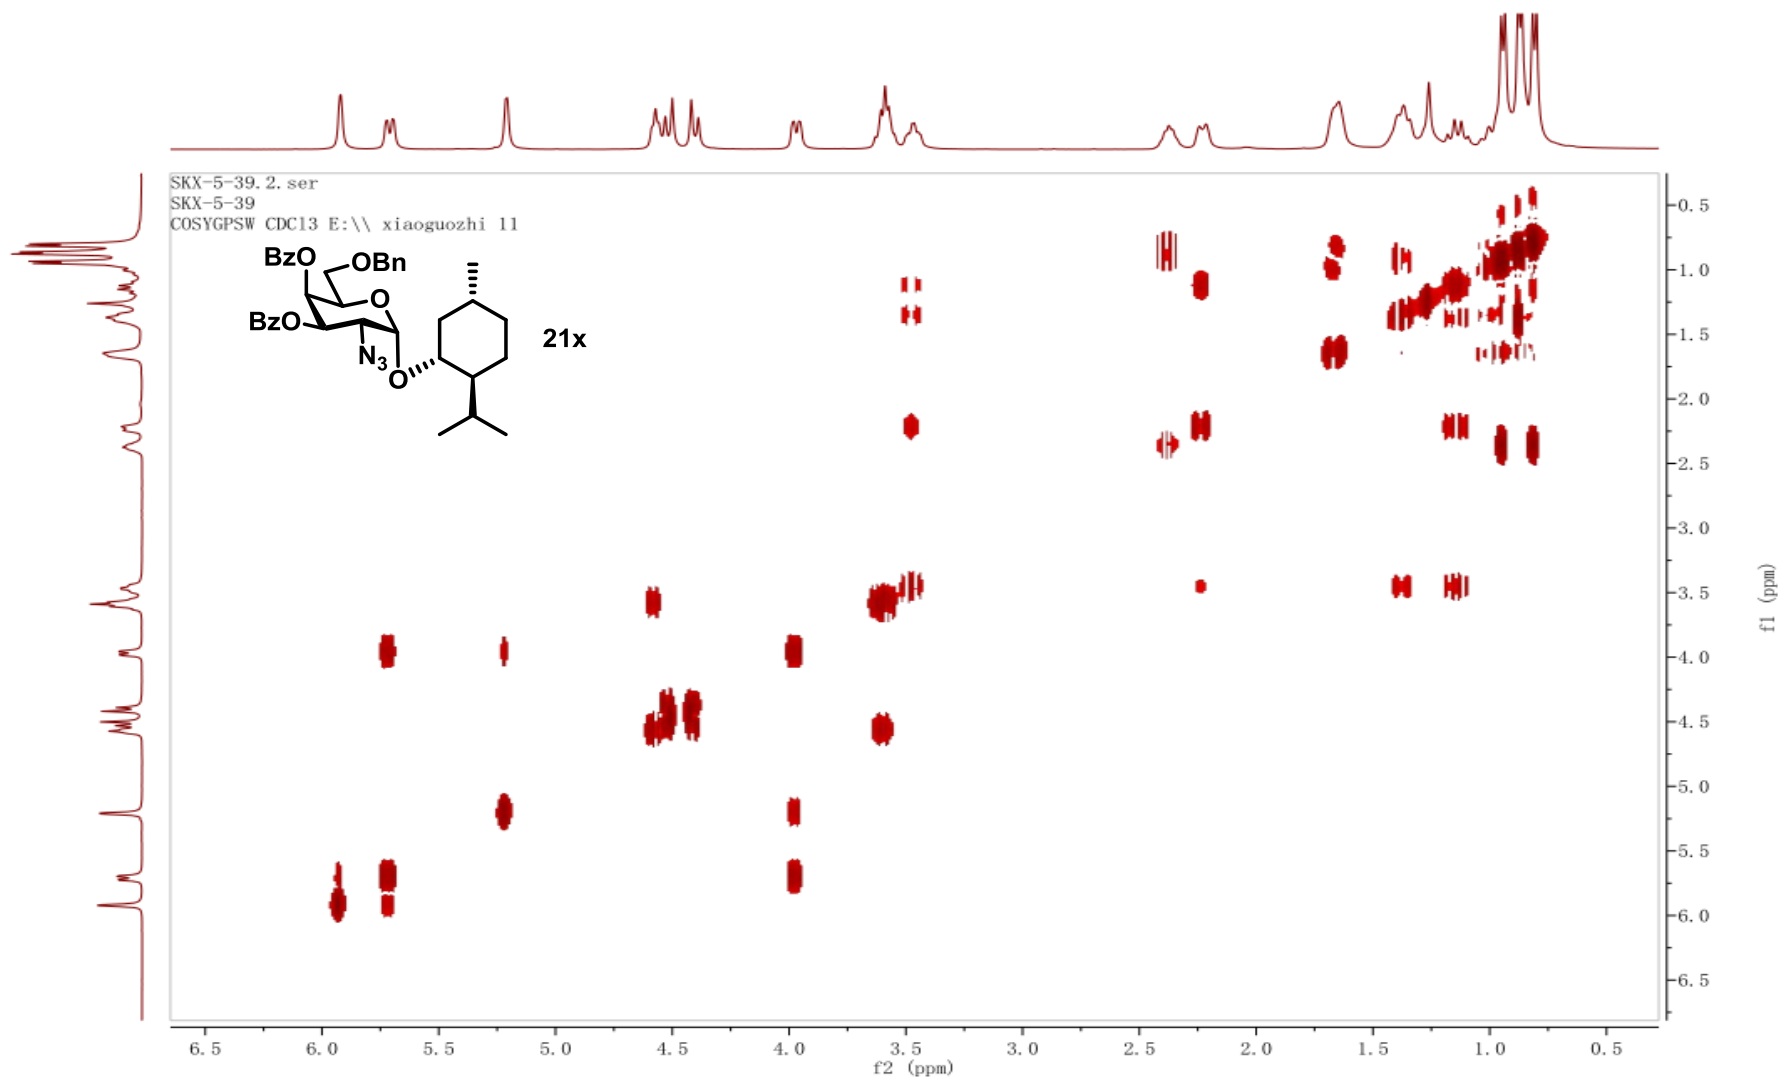

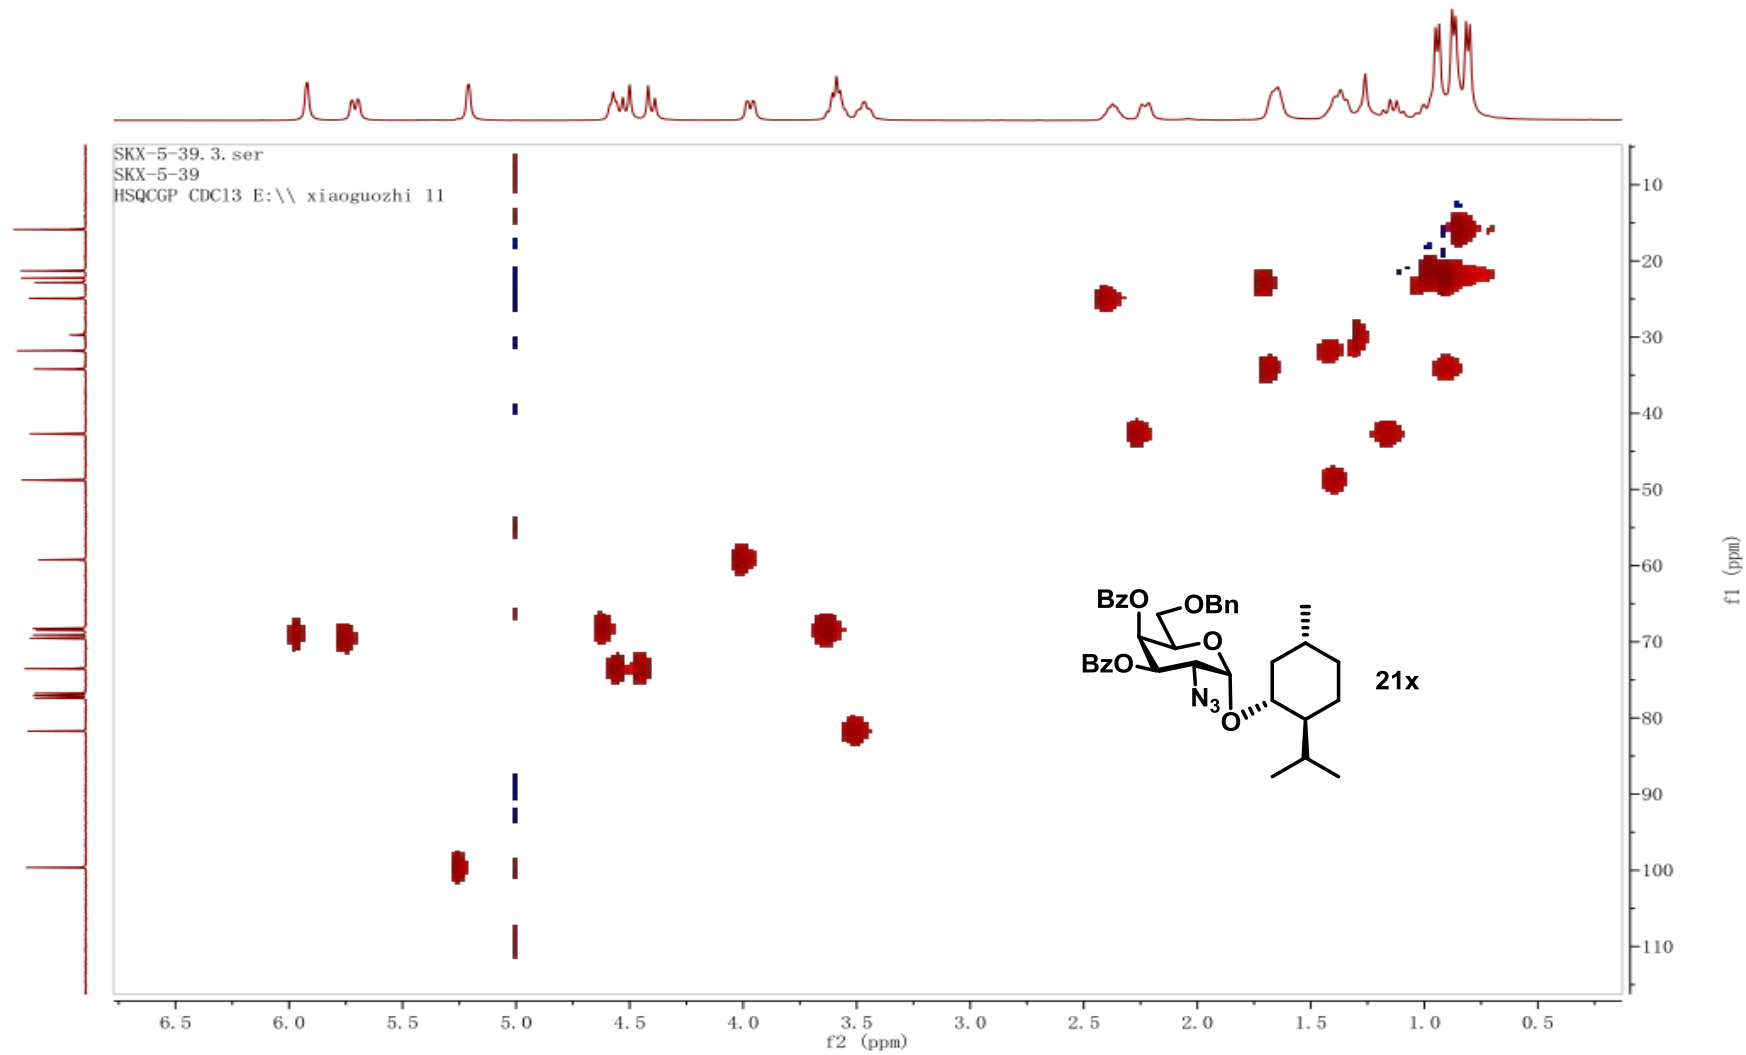

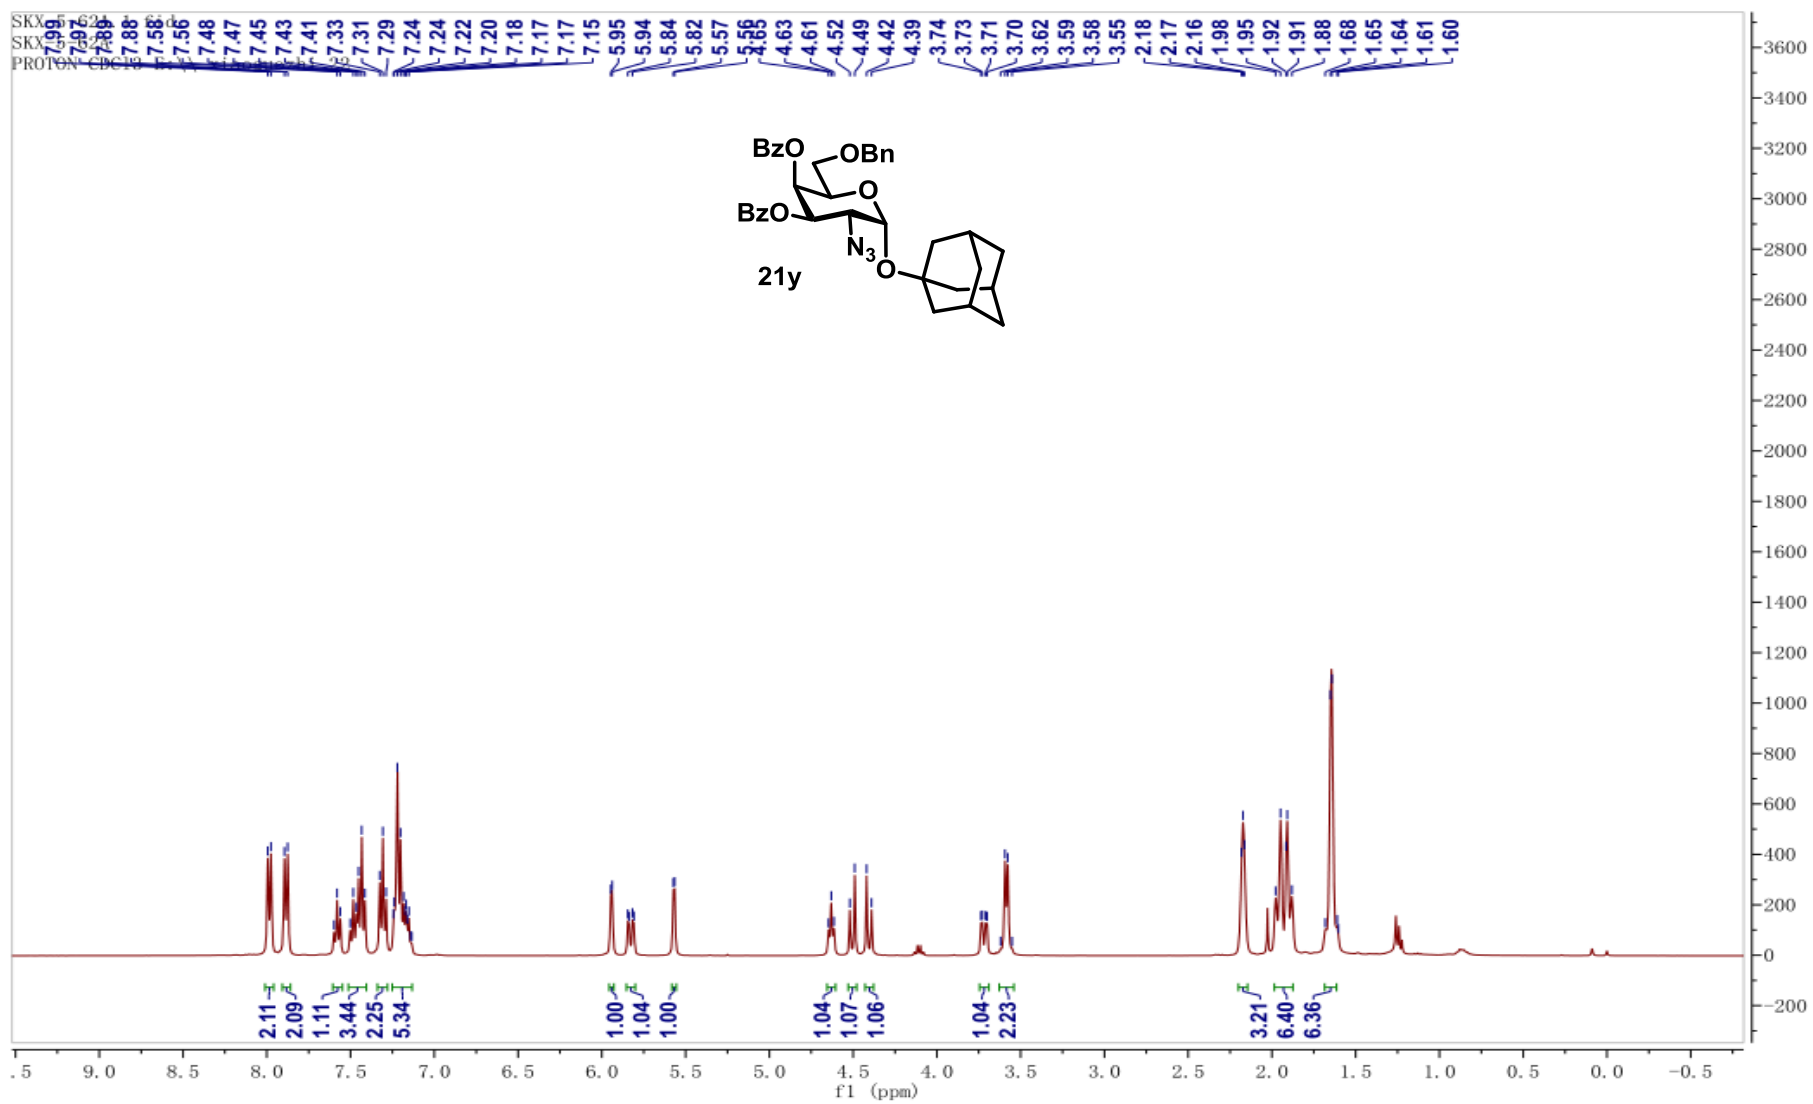

SKX-5-62A.3.fid

SKX-5-62A

c13 CDC13 E:\ xiaoguozi 2

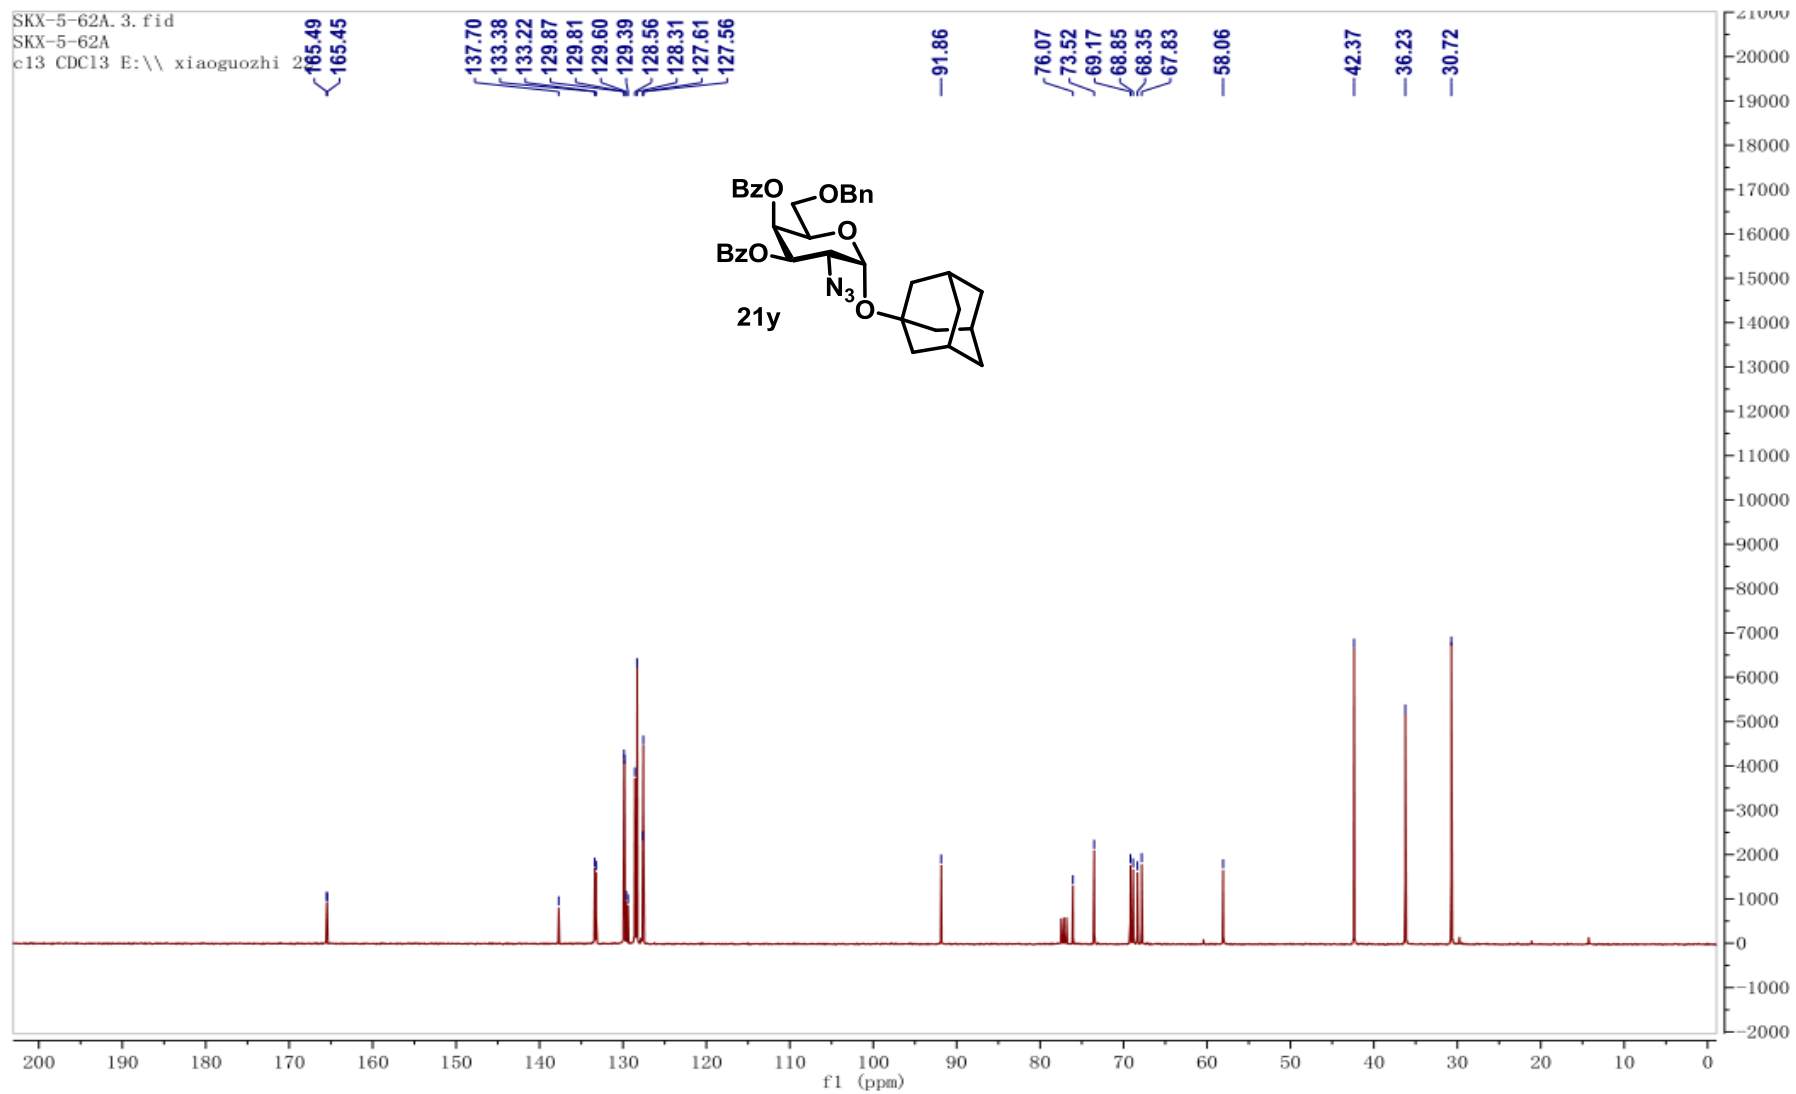

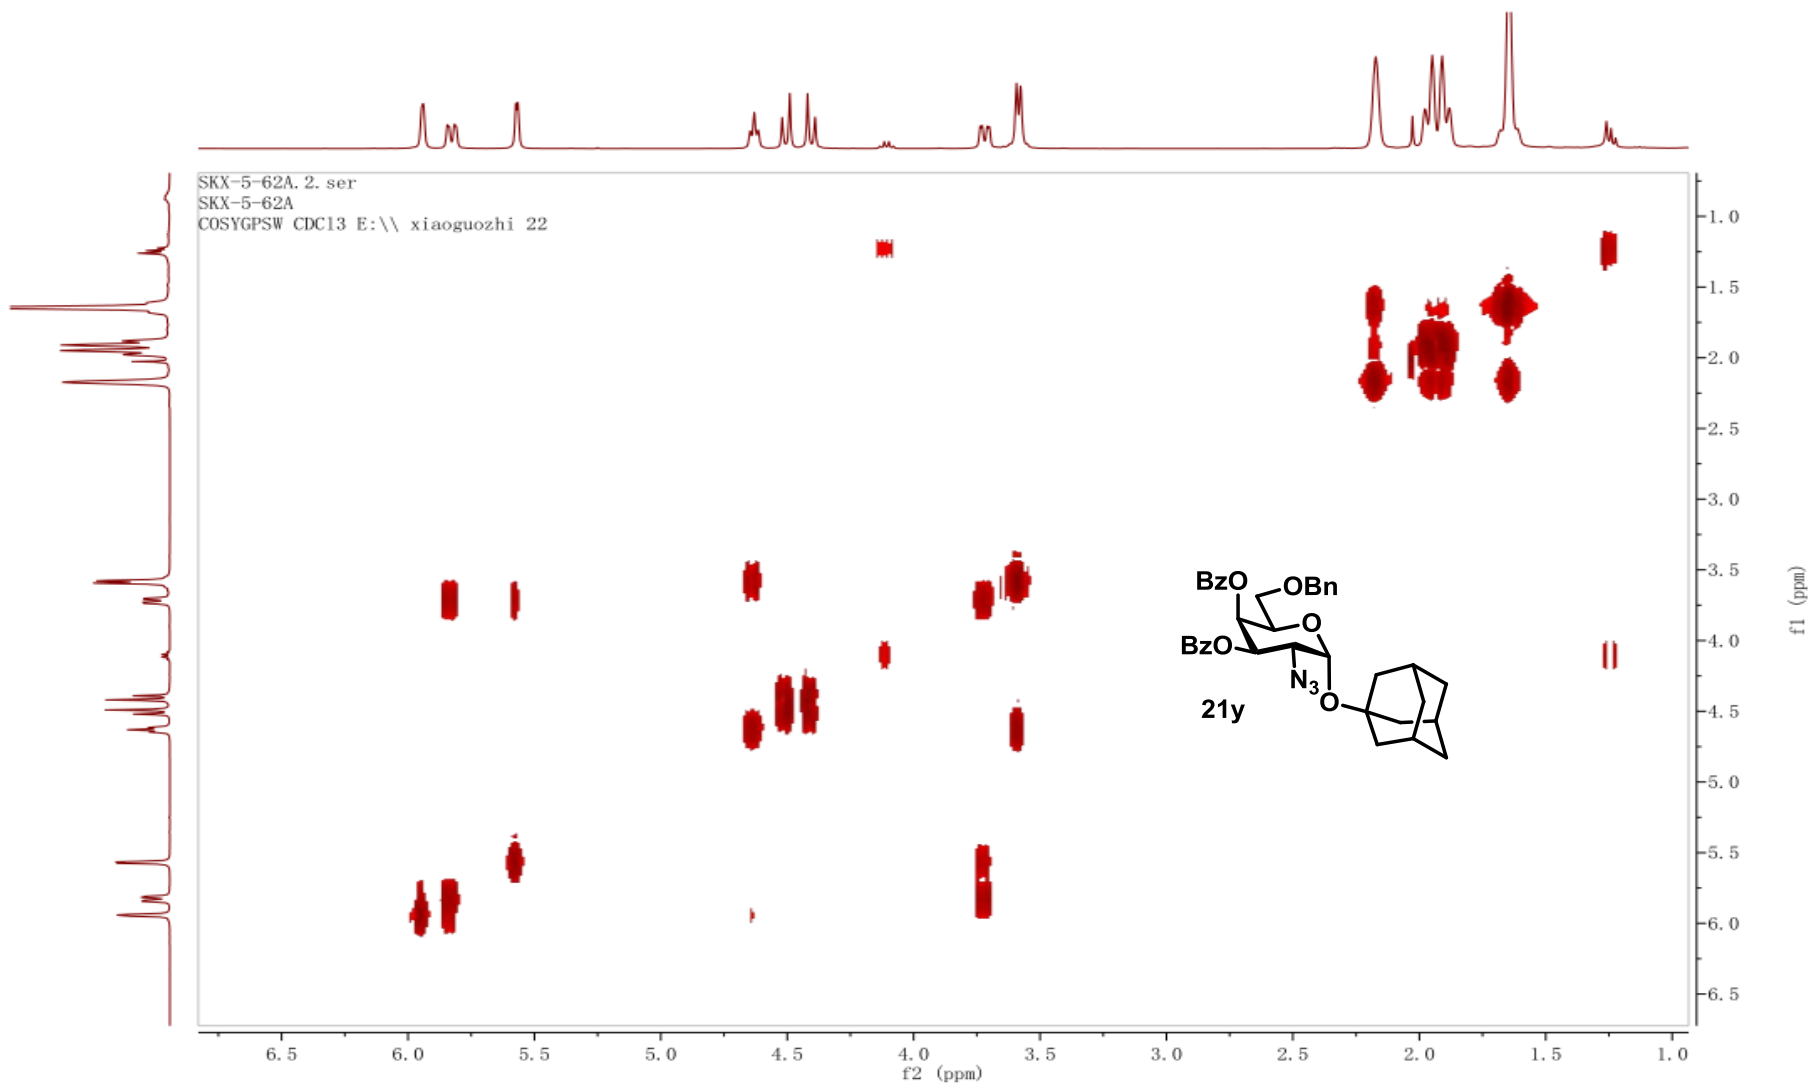



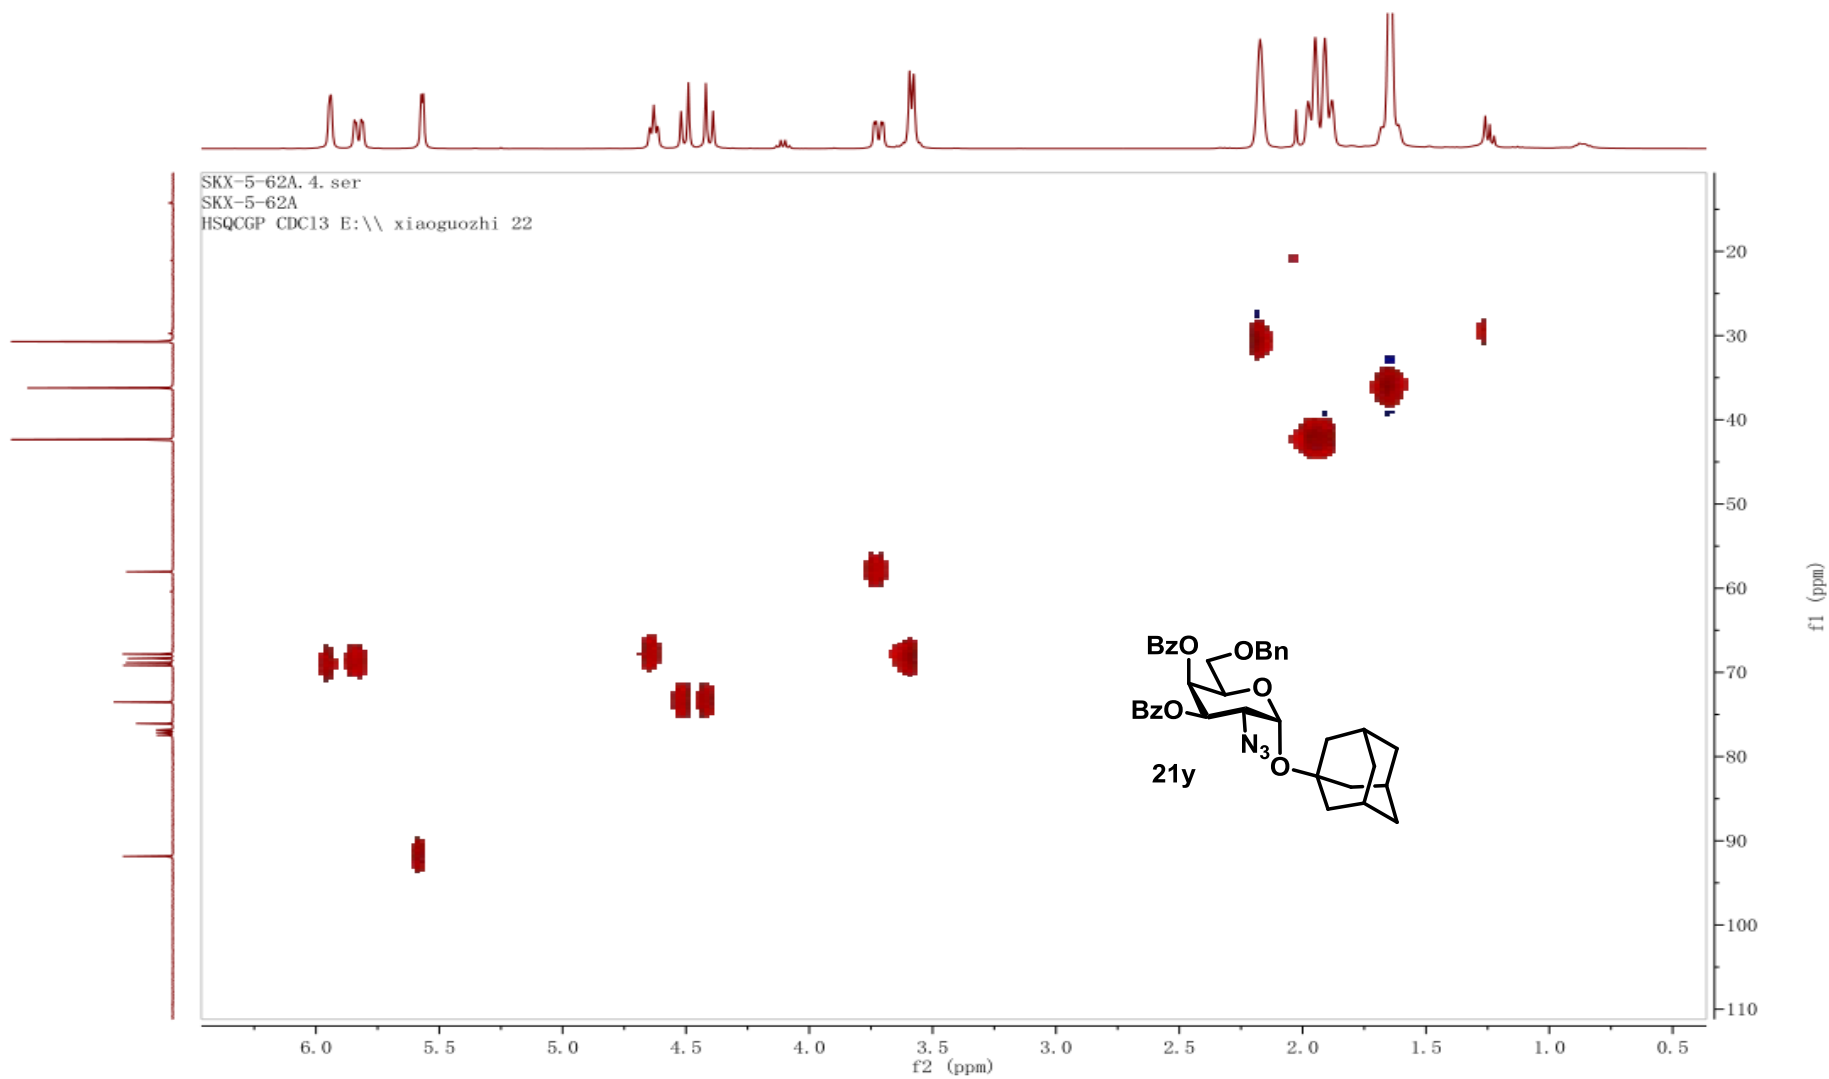

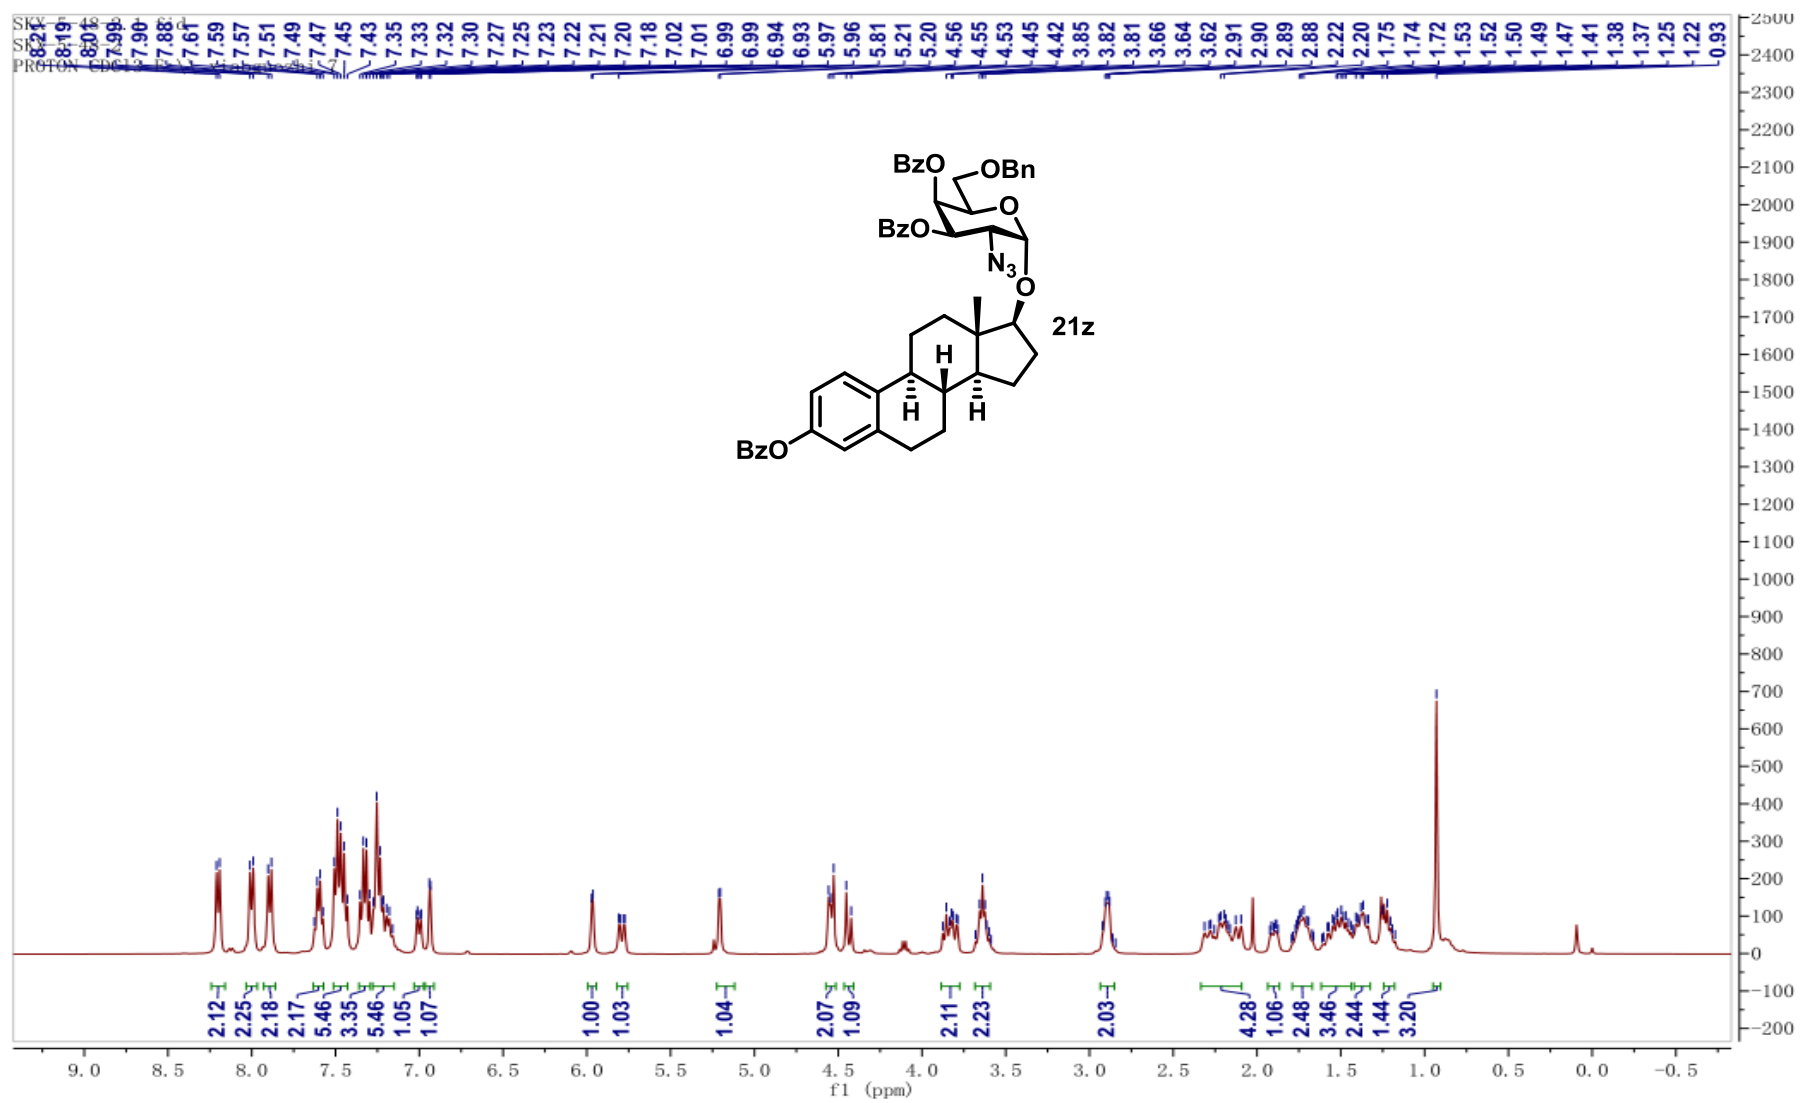

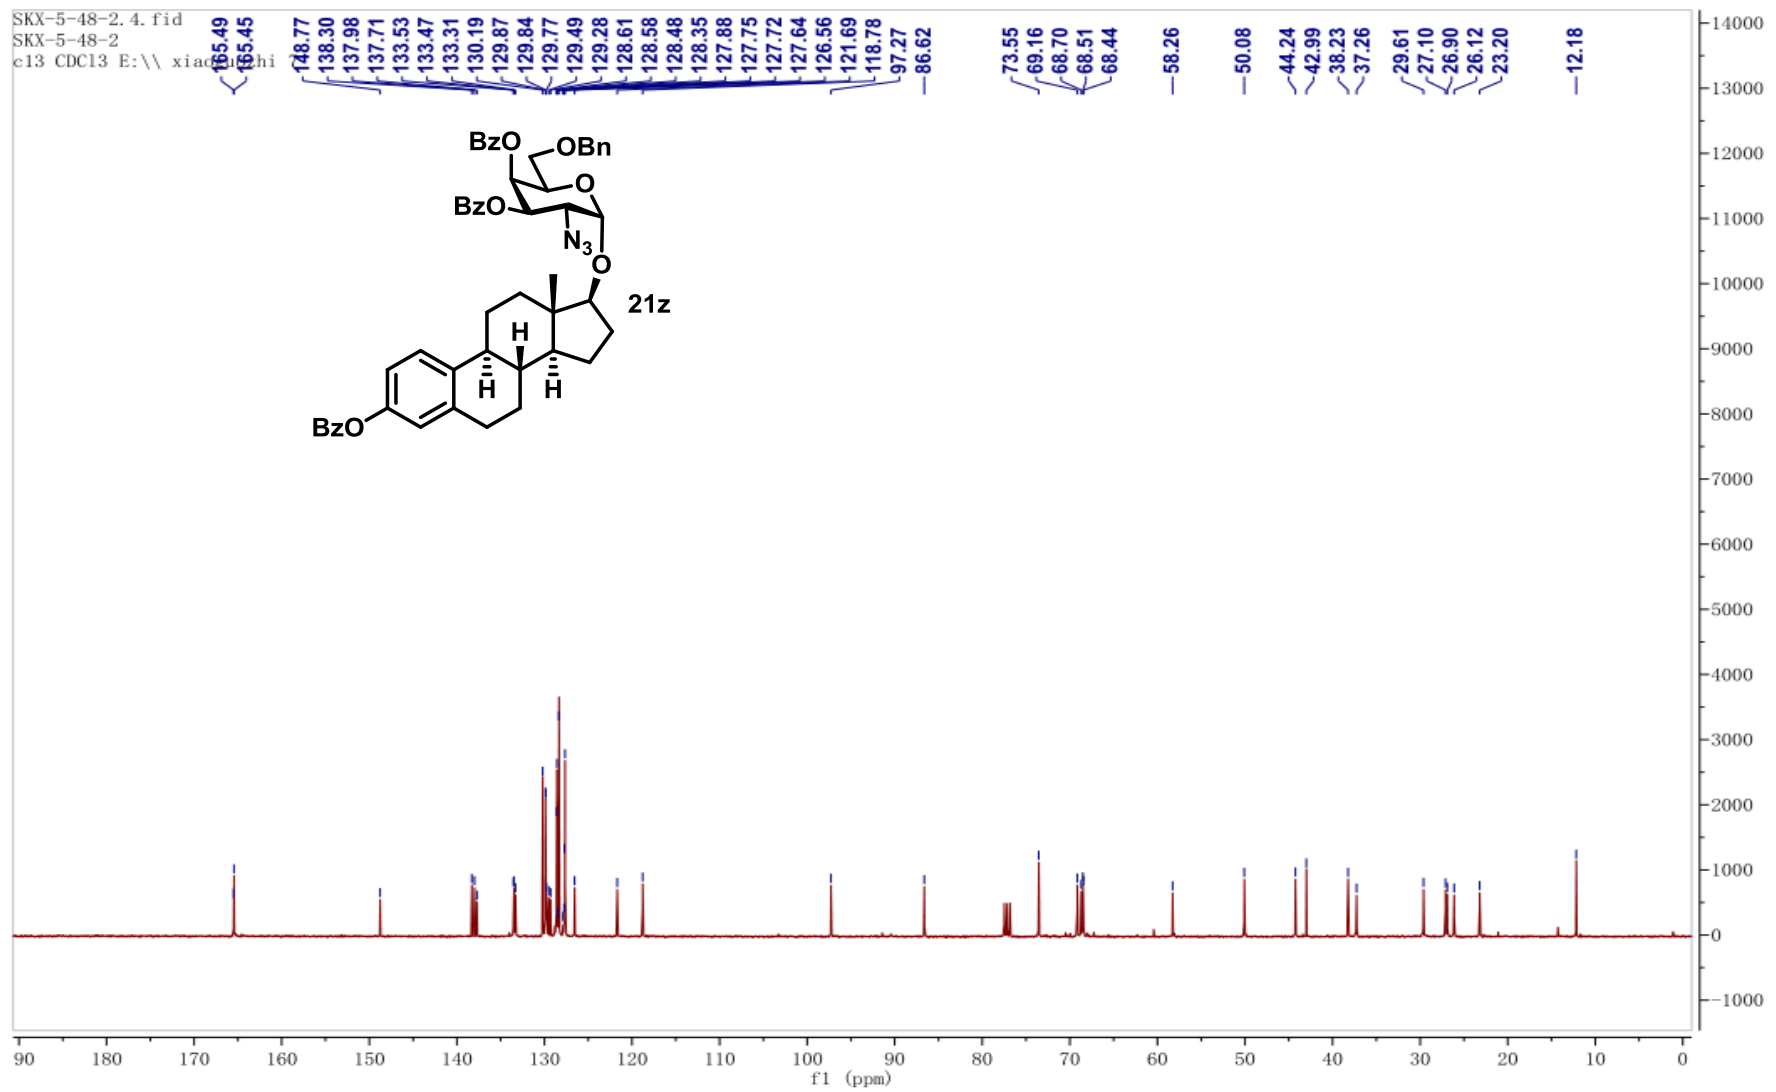

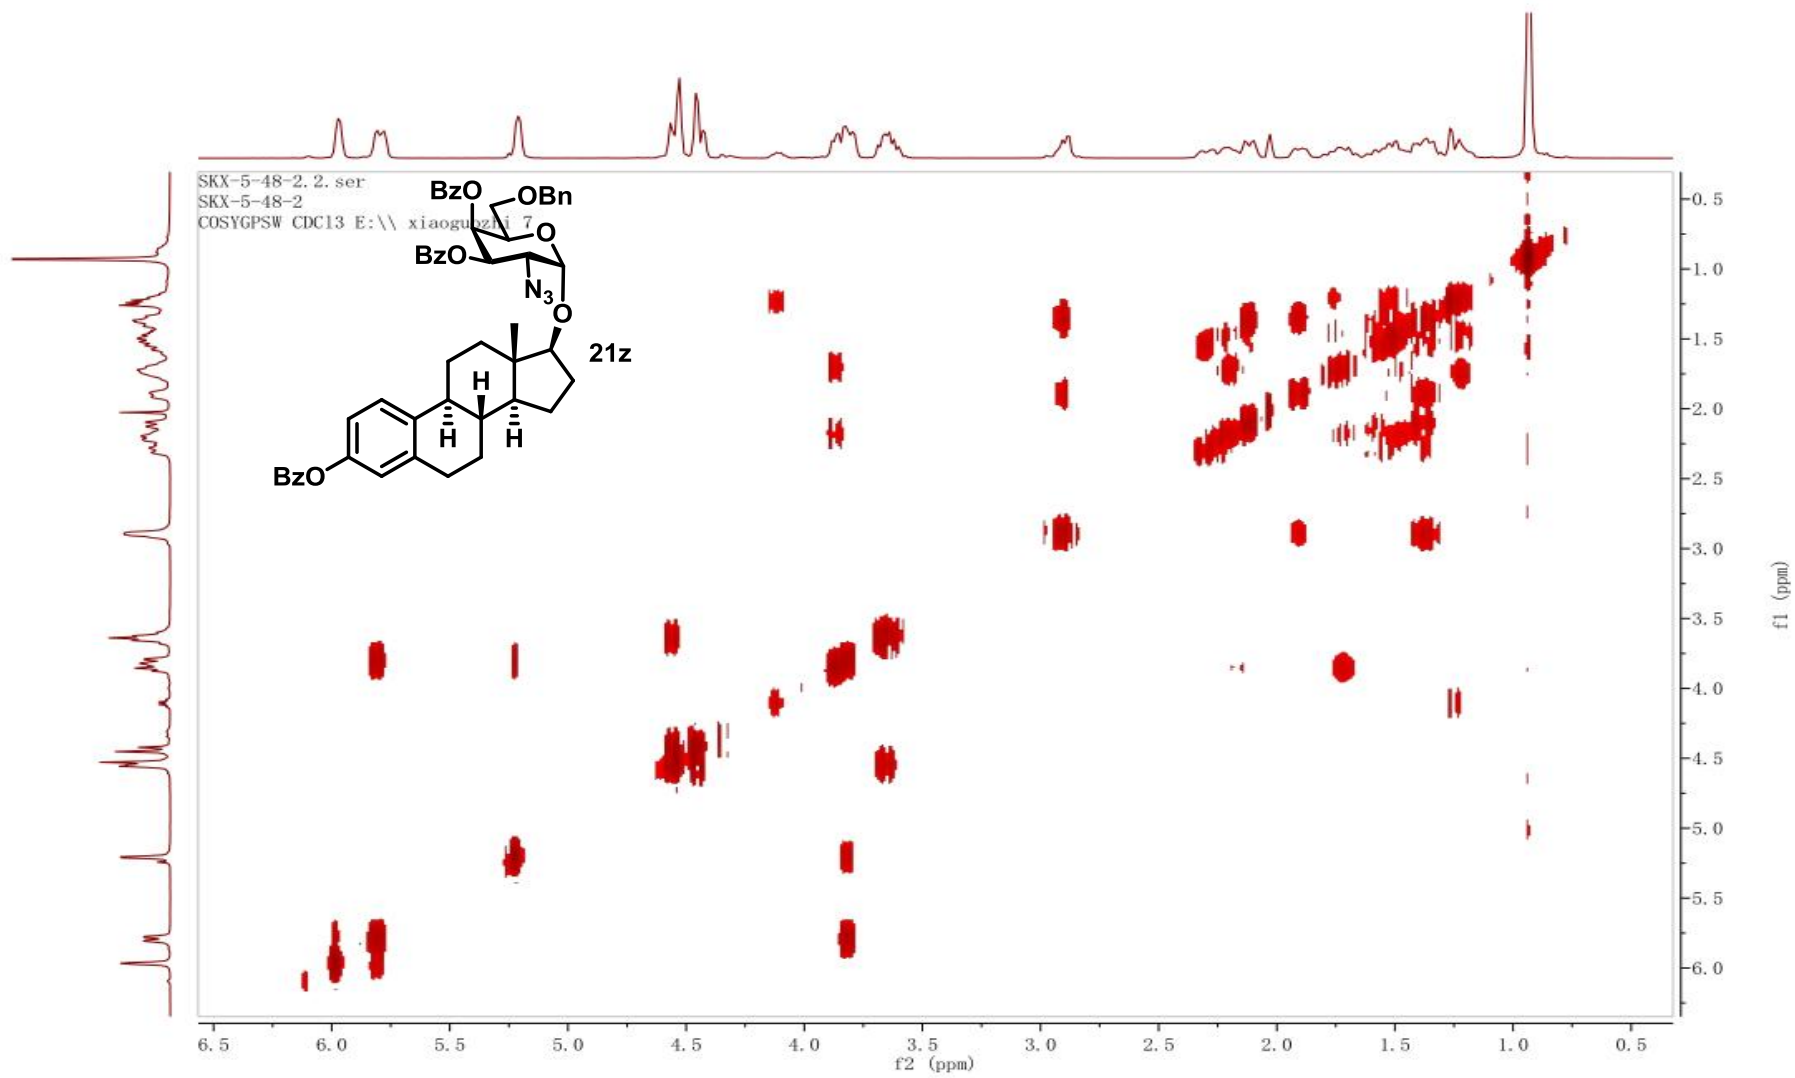

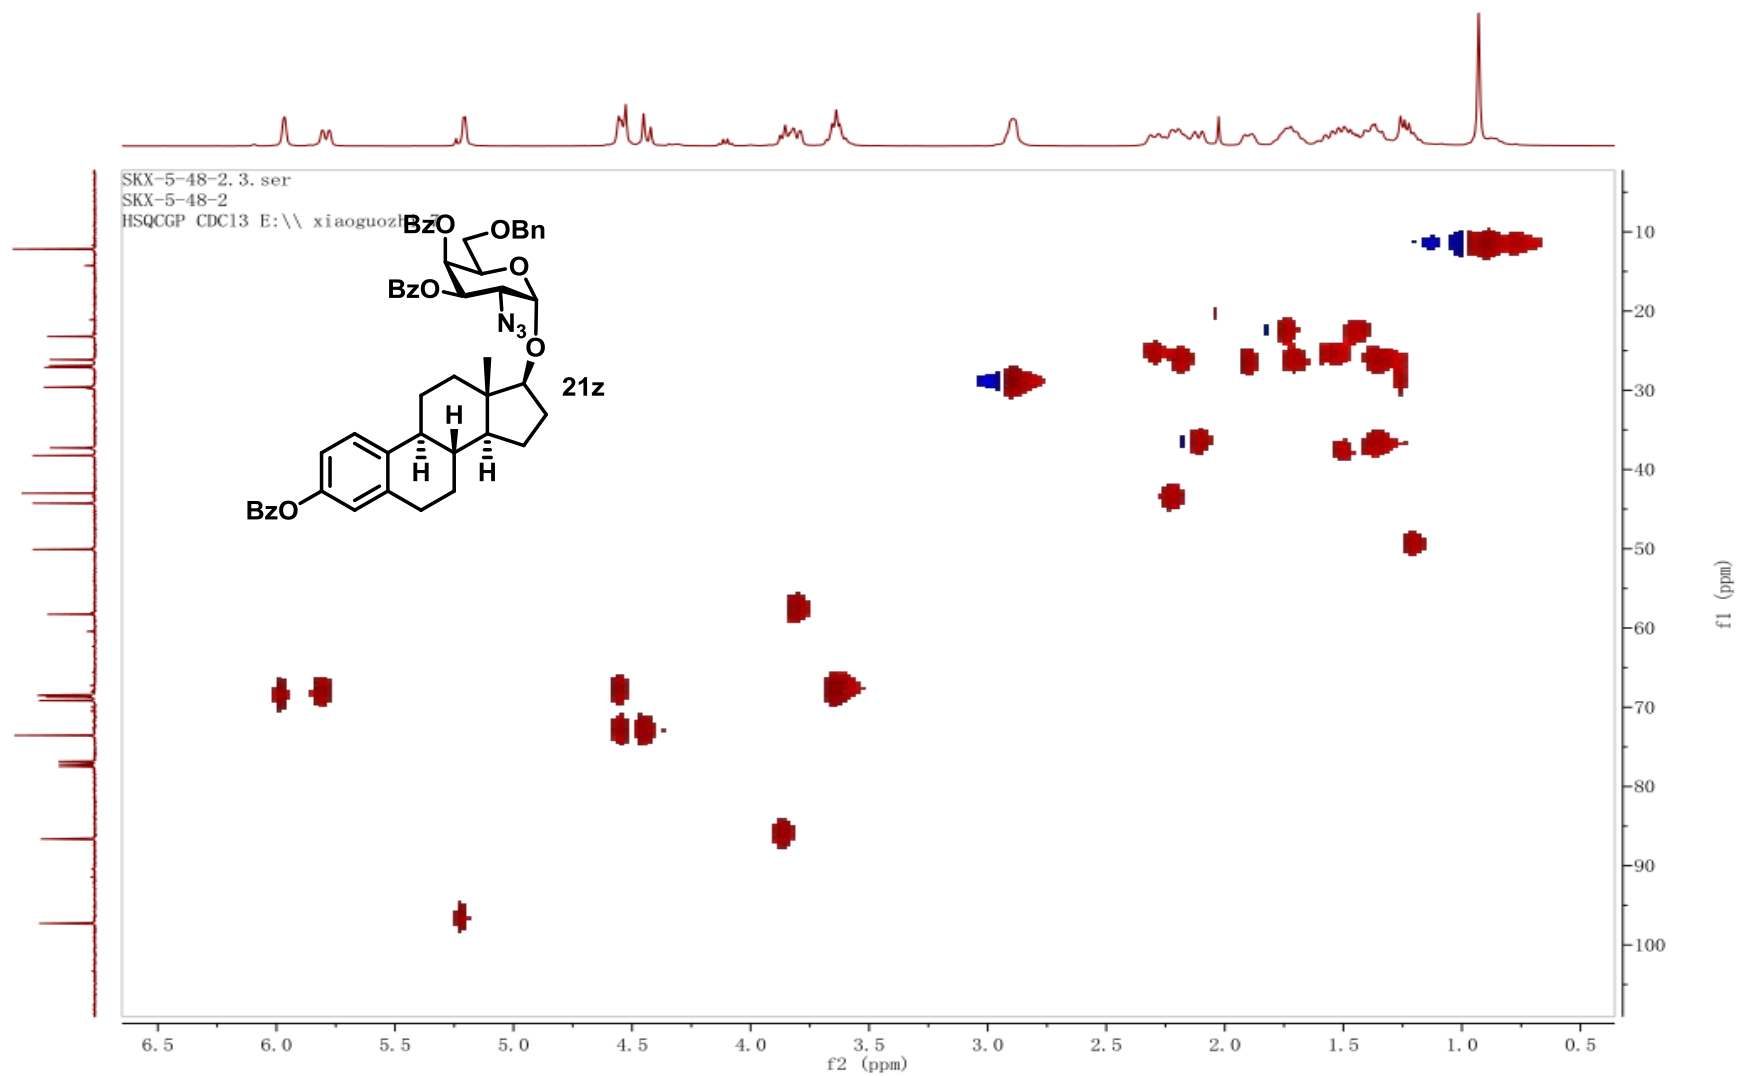

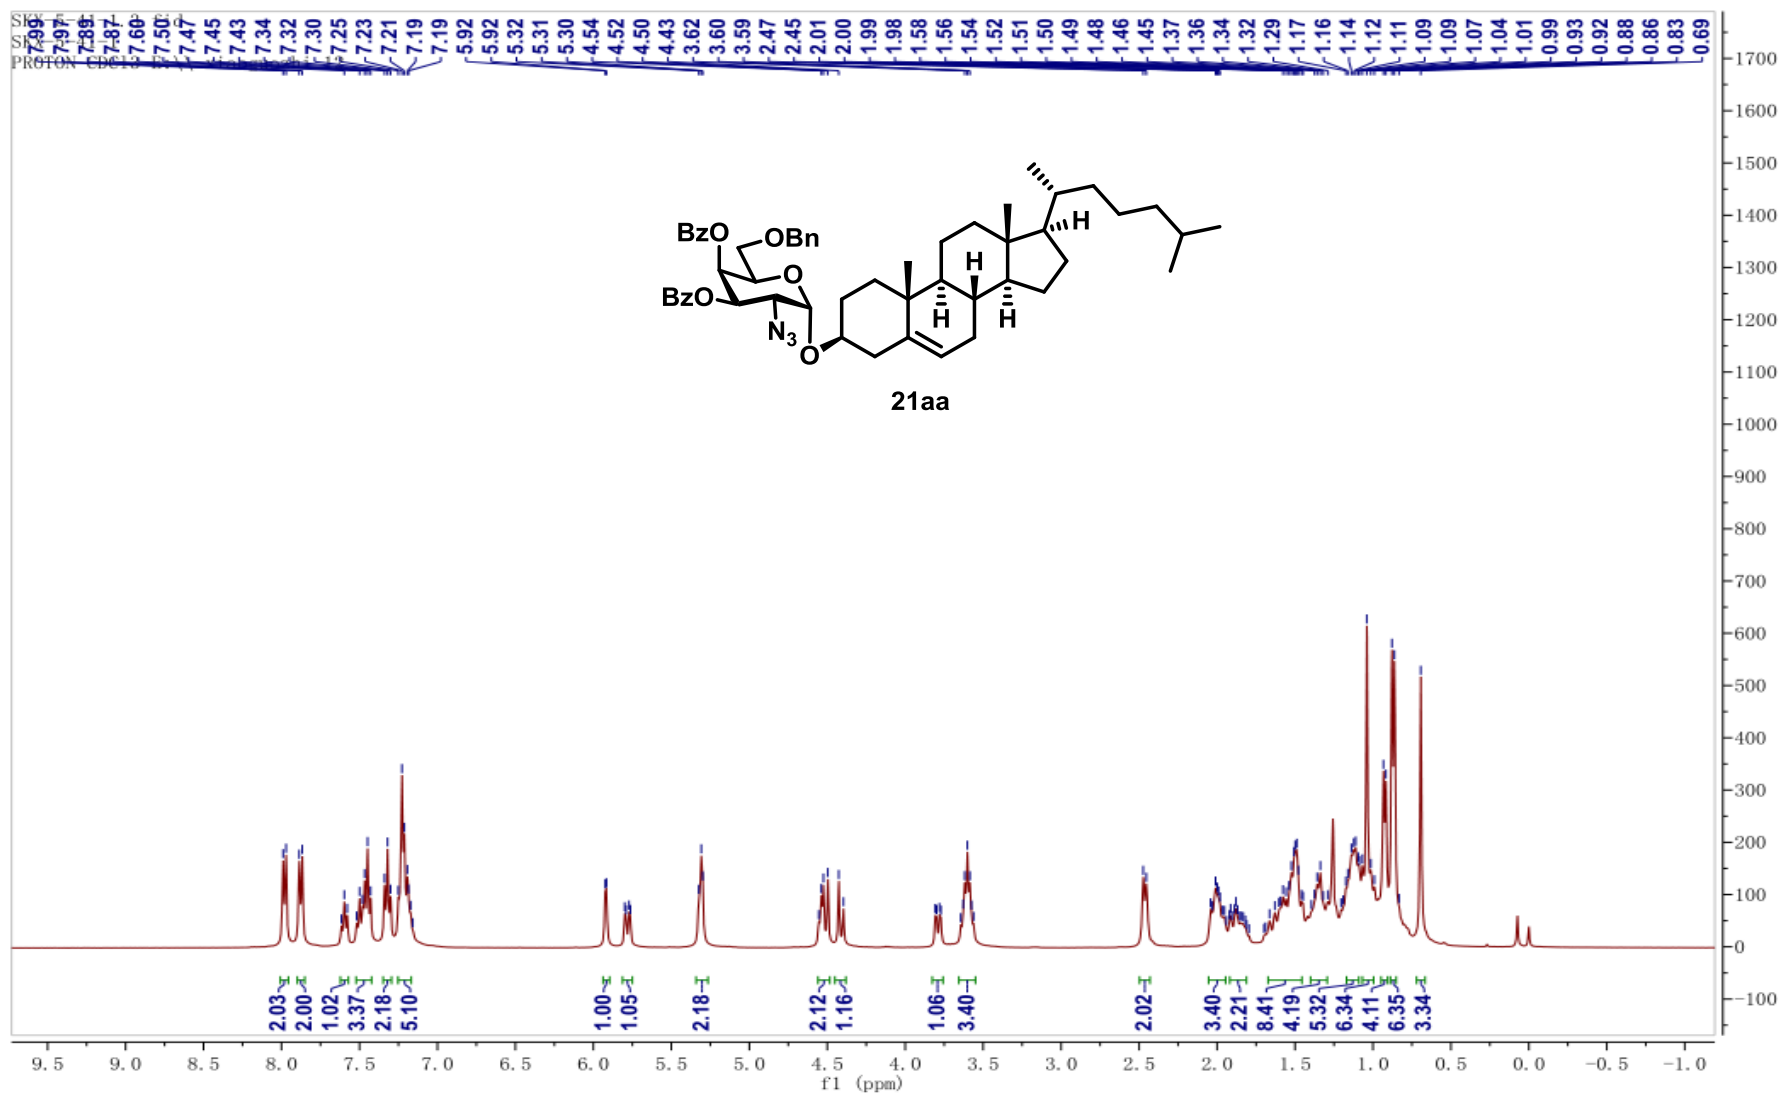

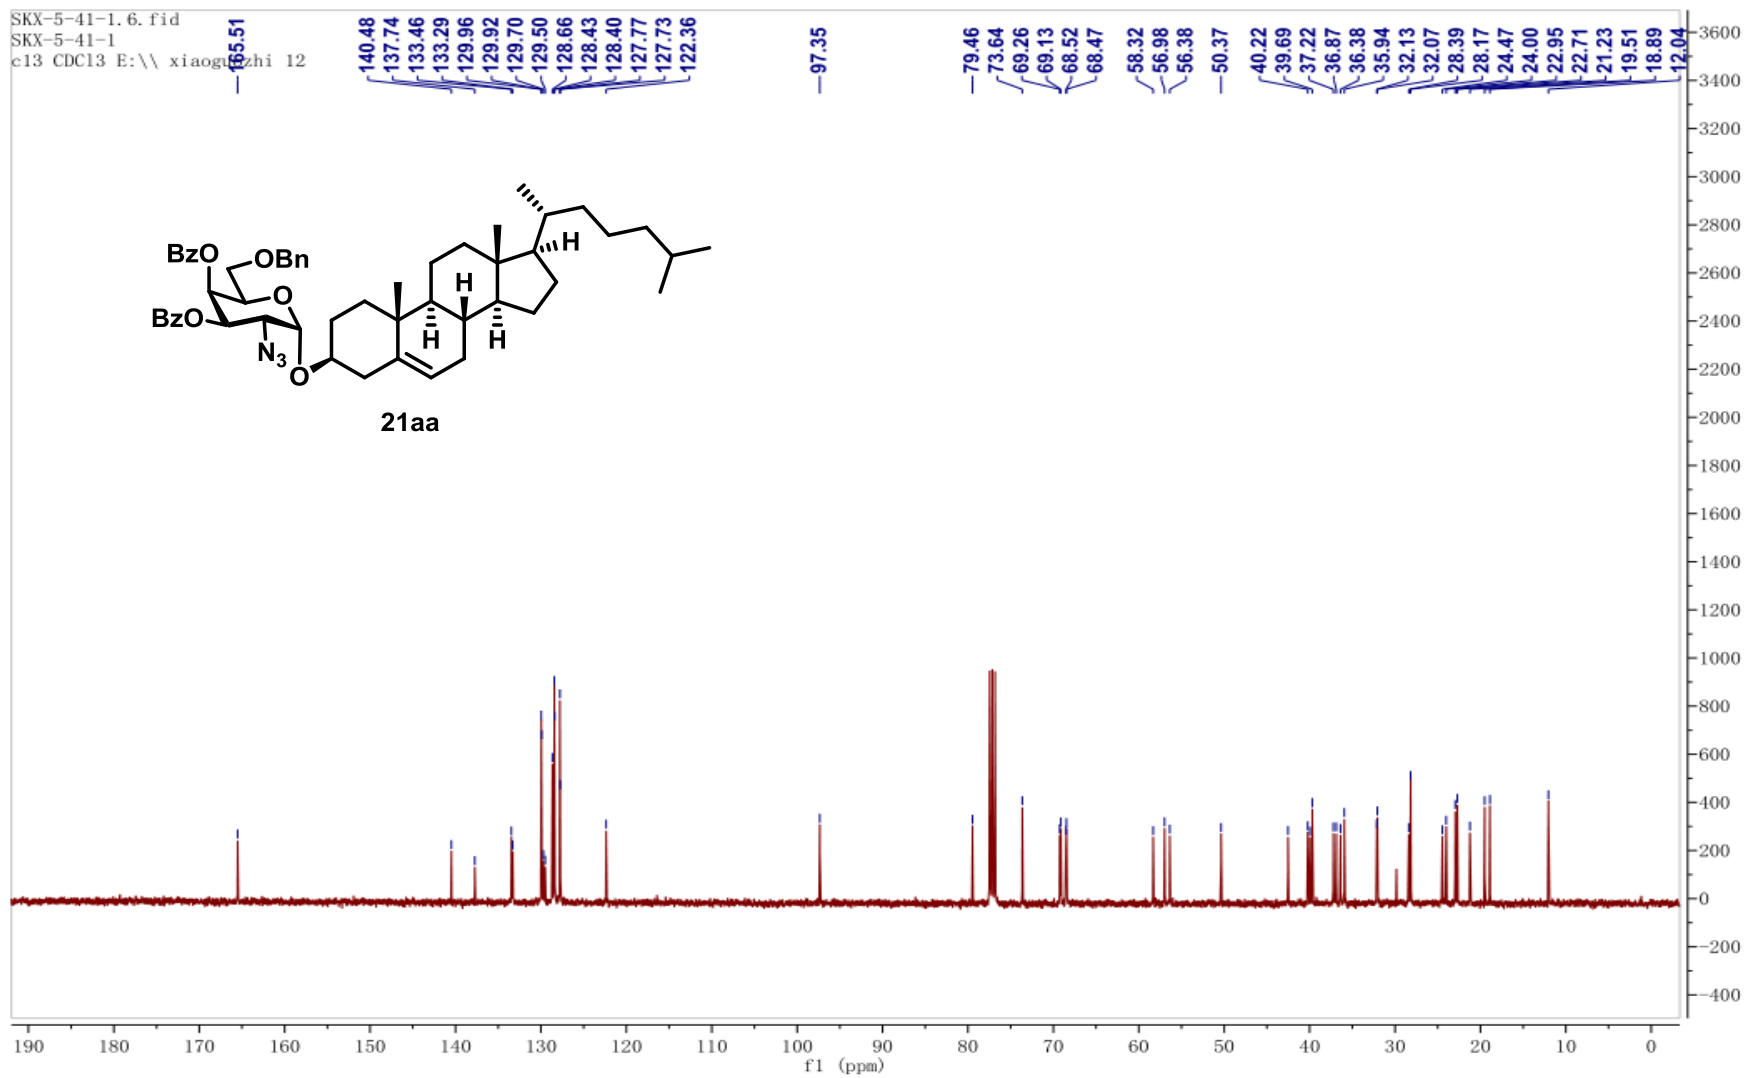

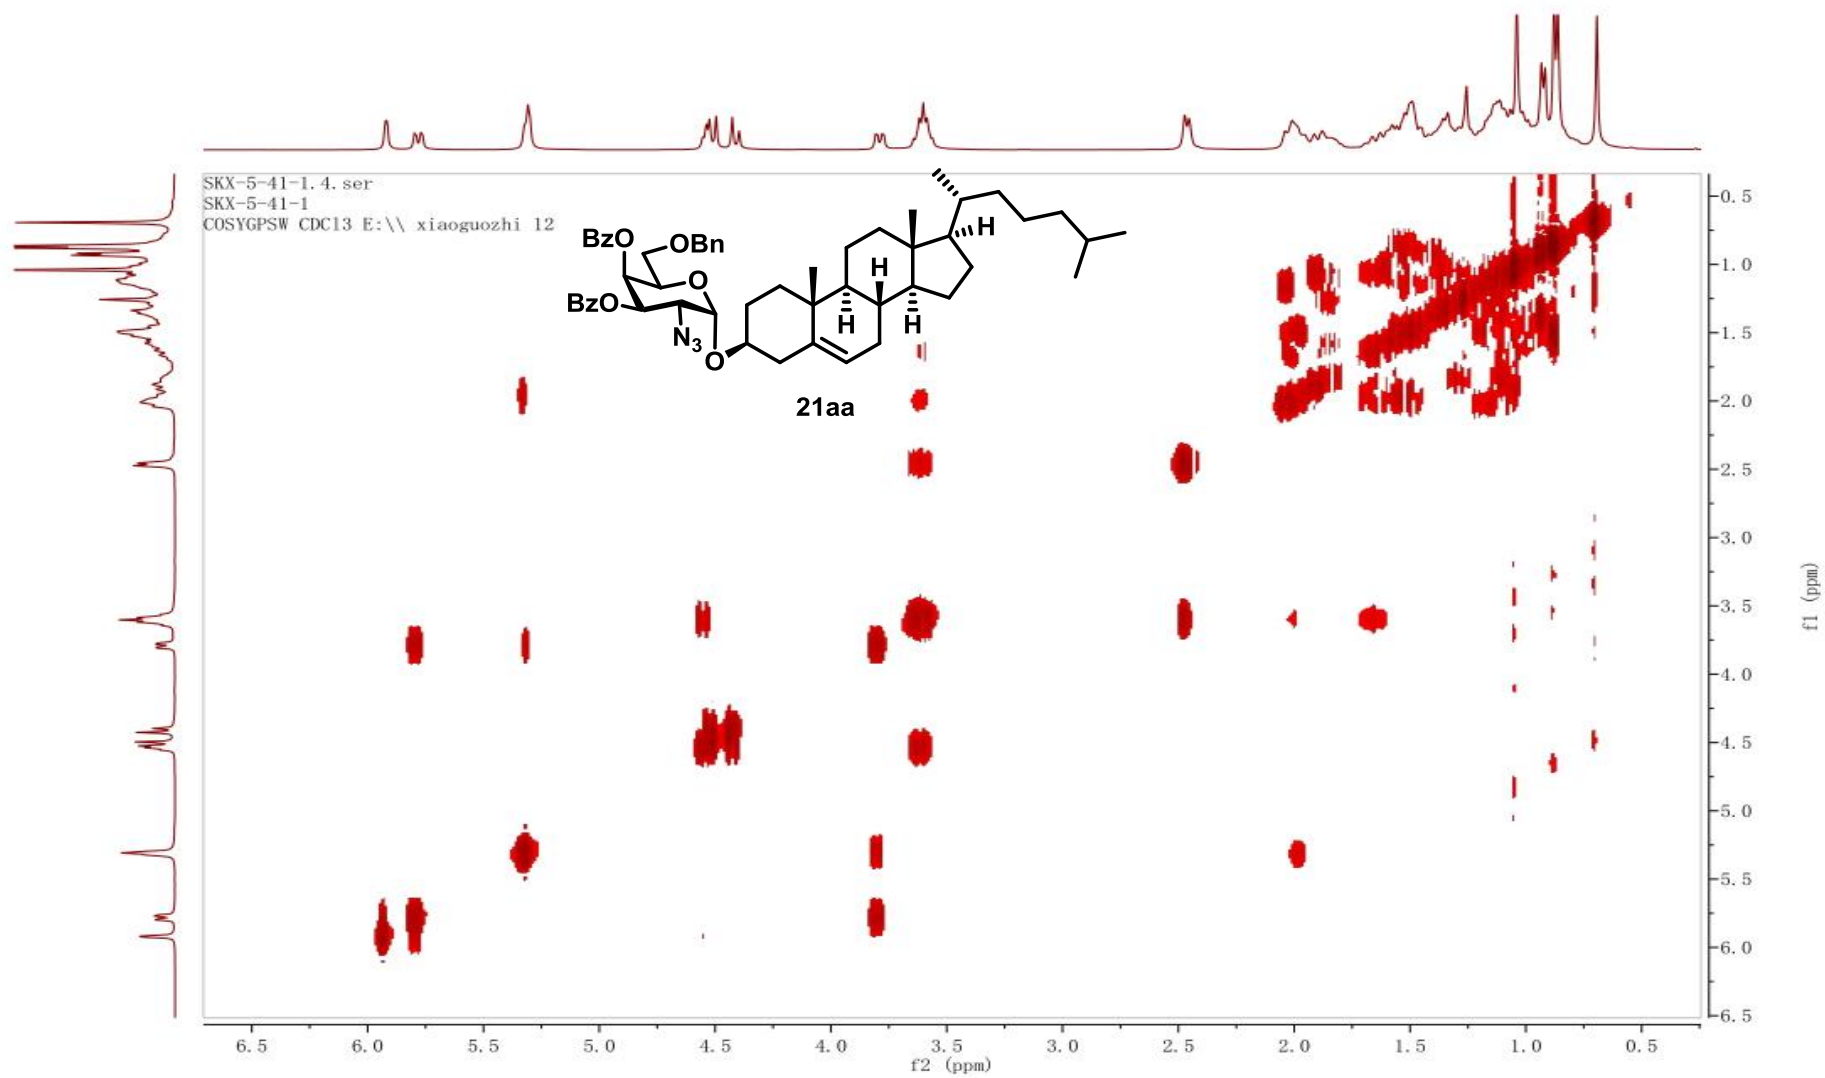



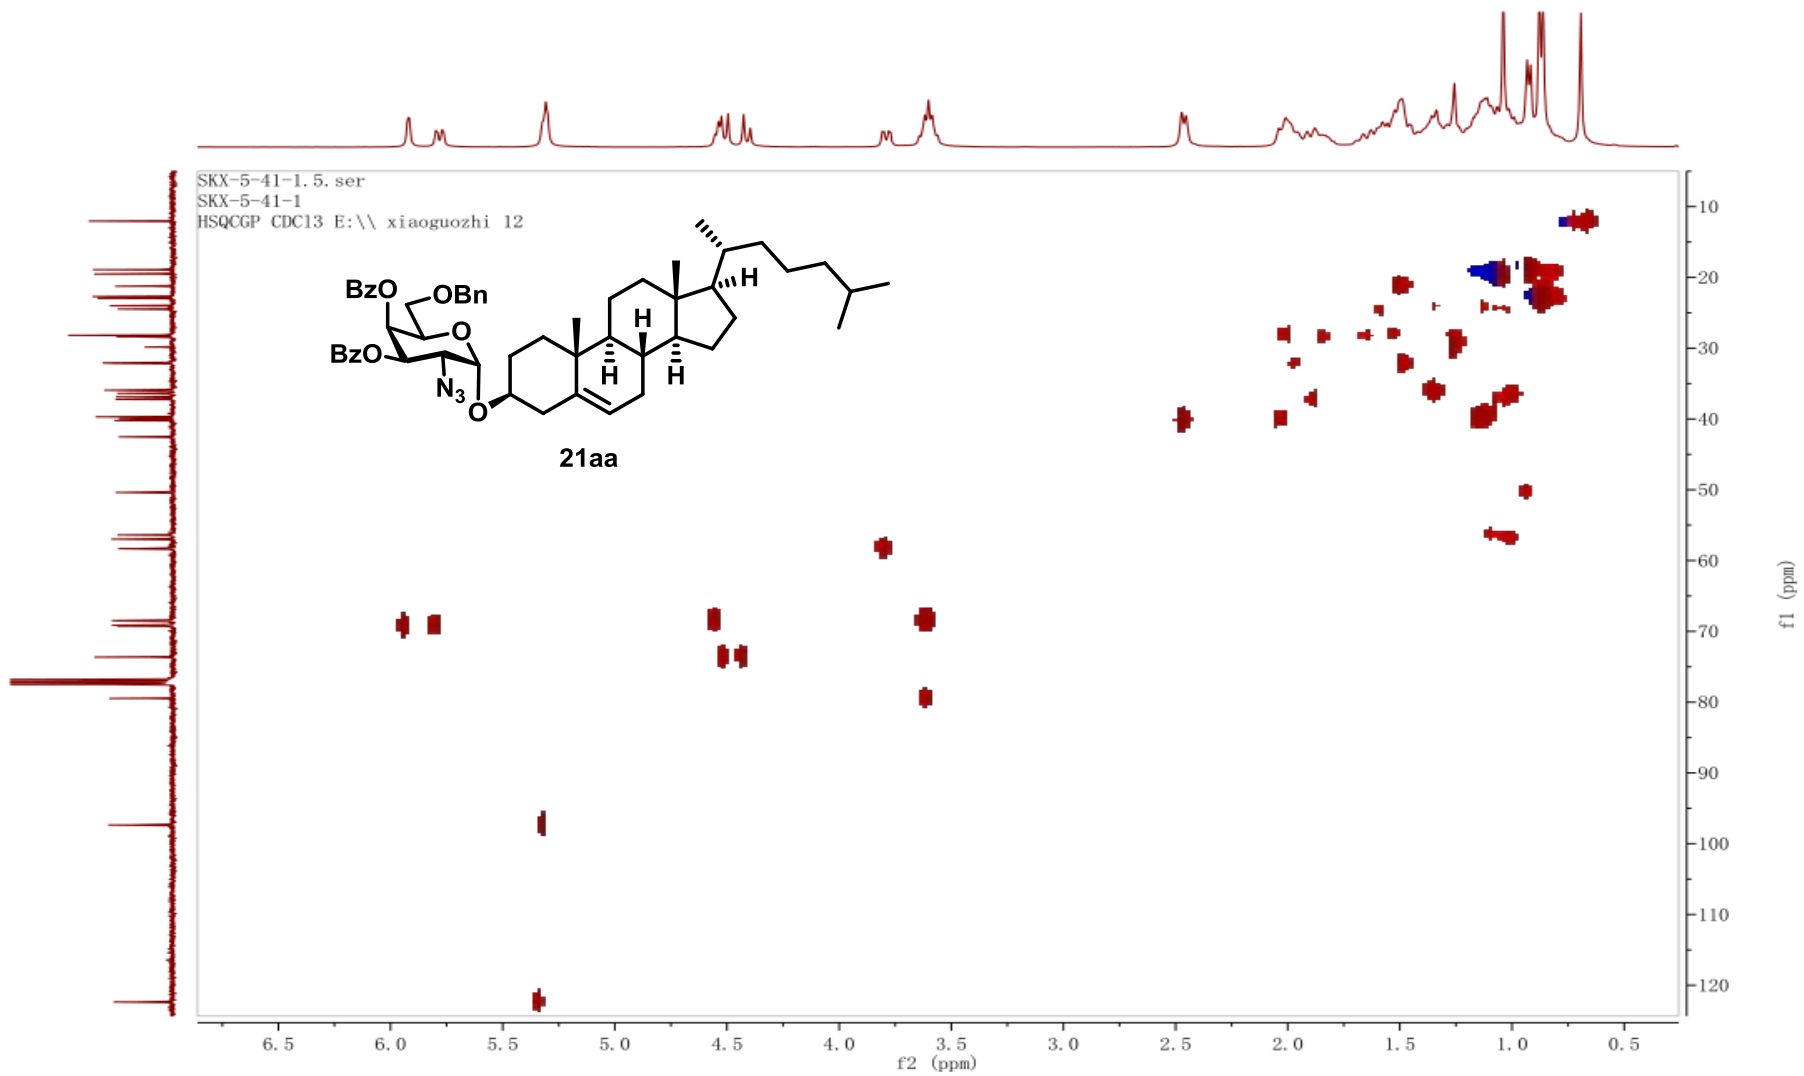

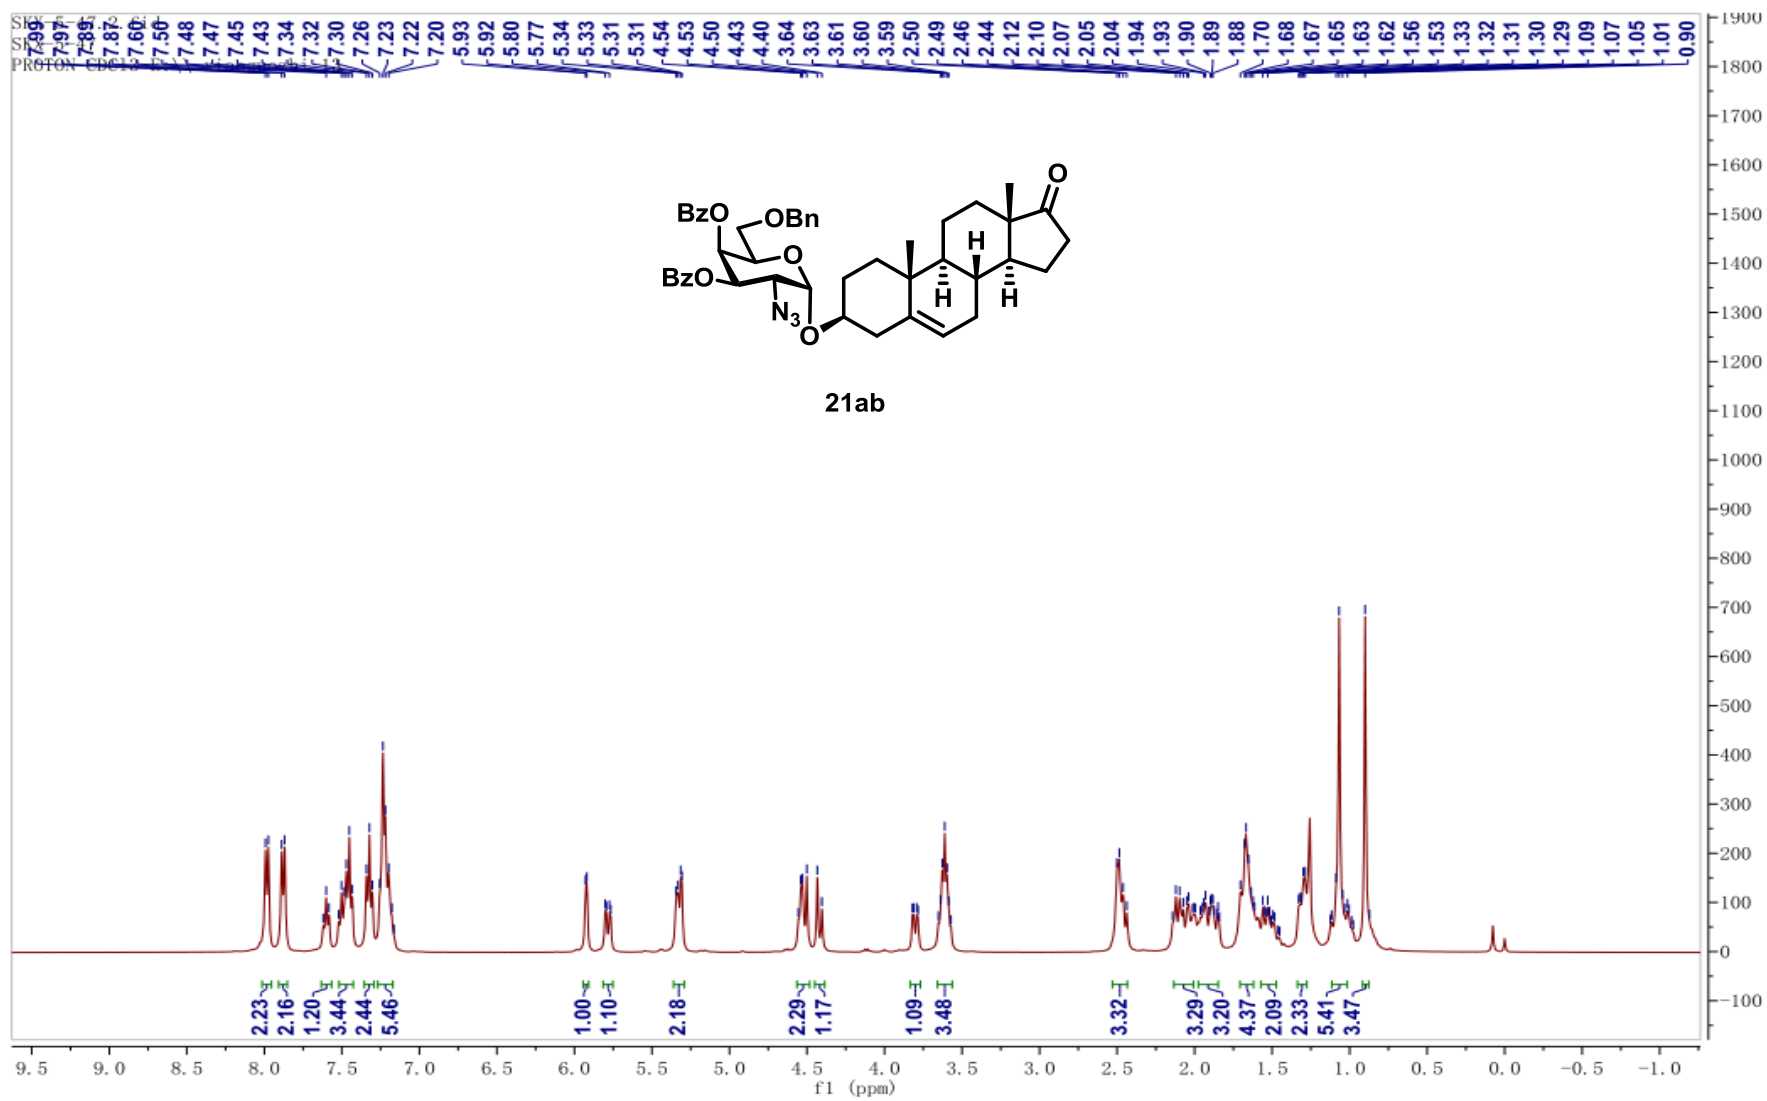

SKX-5-46 4.fid  
SKX-5-46  
c13 CDC13 E:\ xiaoguozi 13

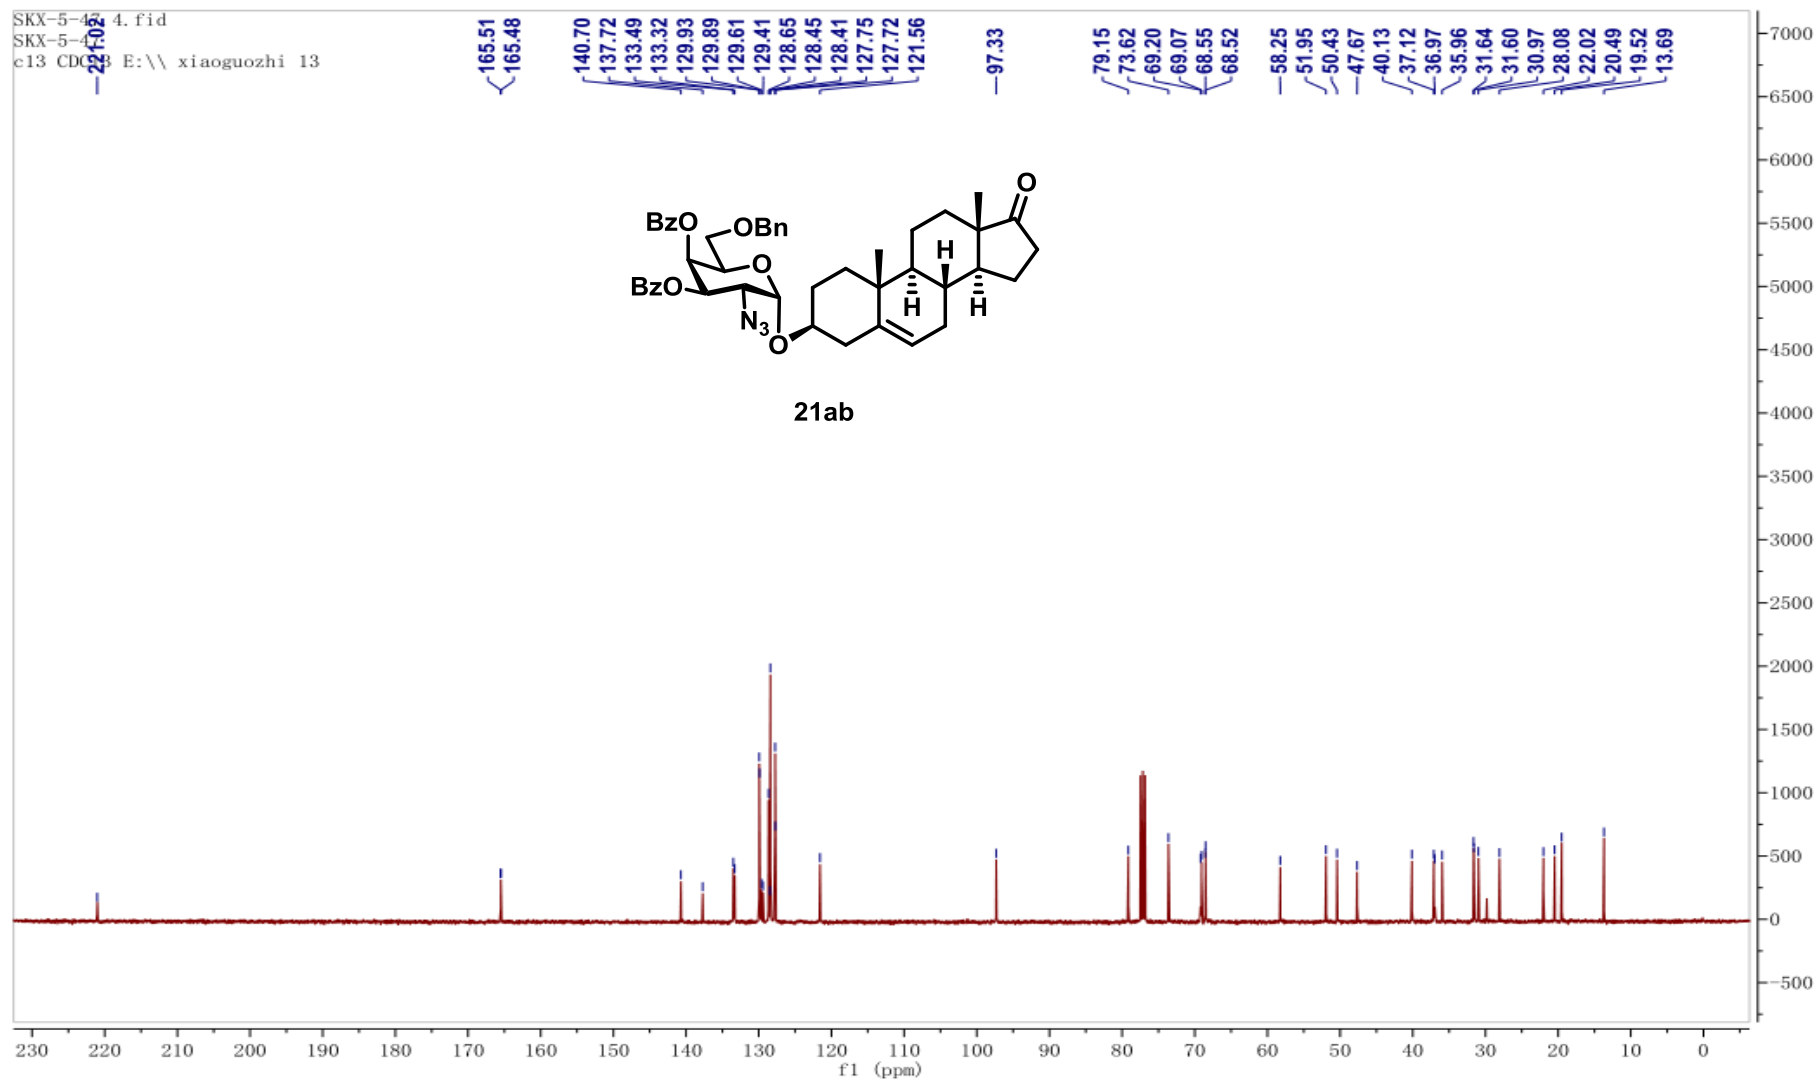

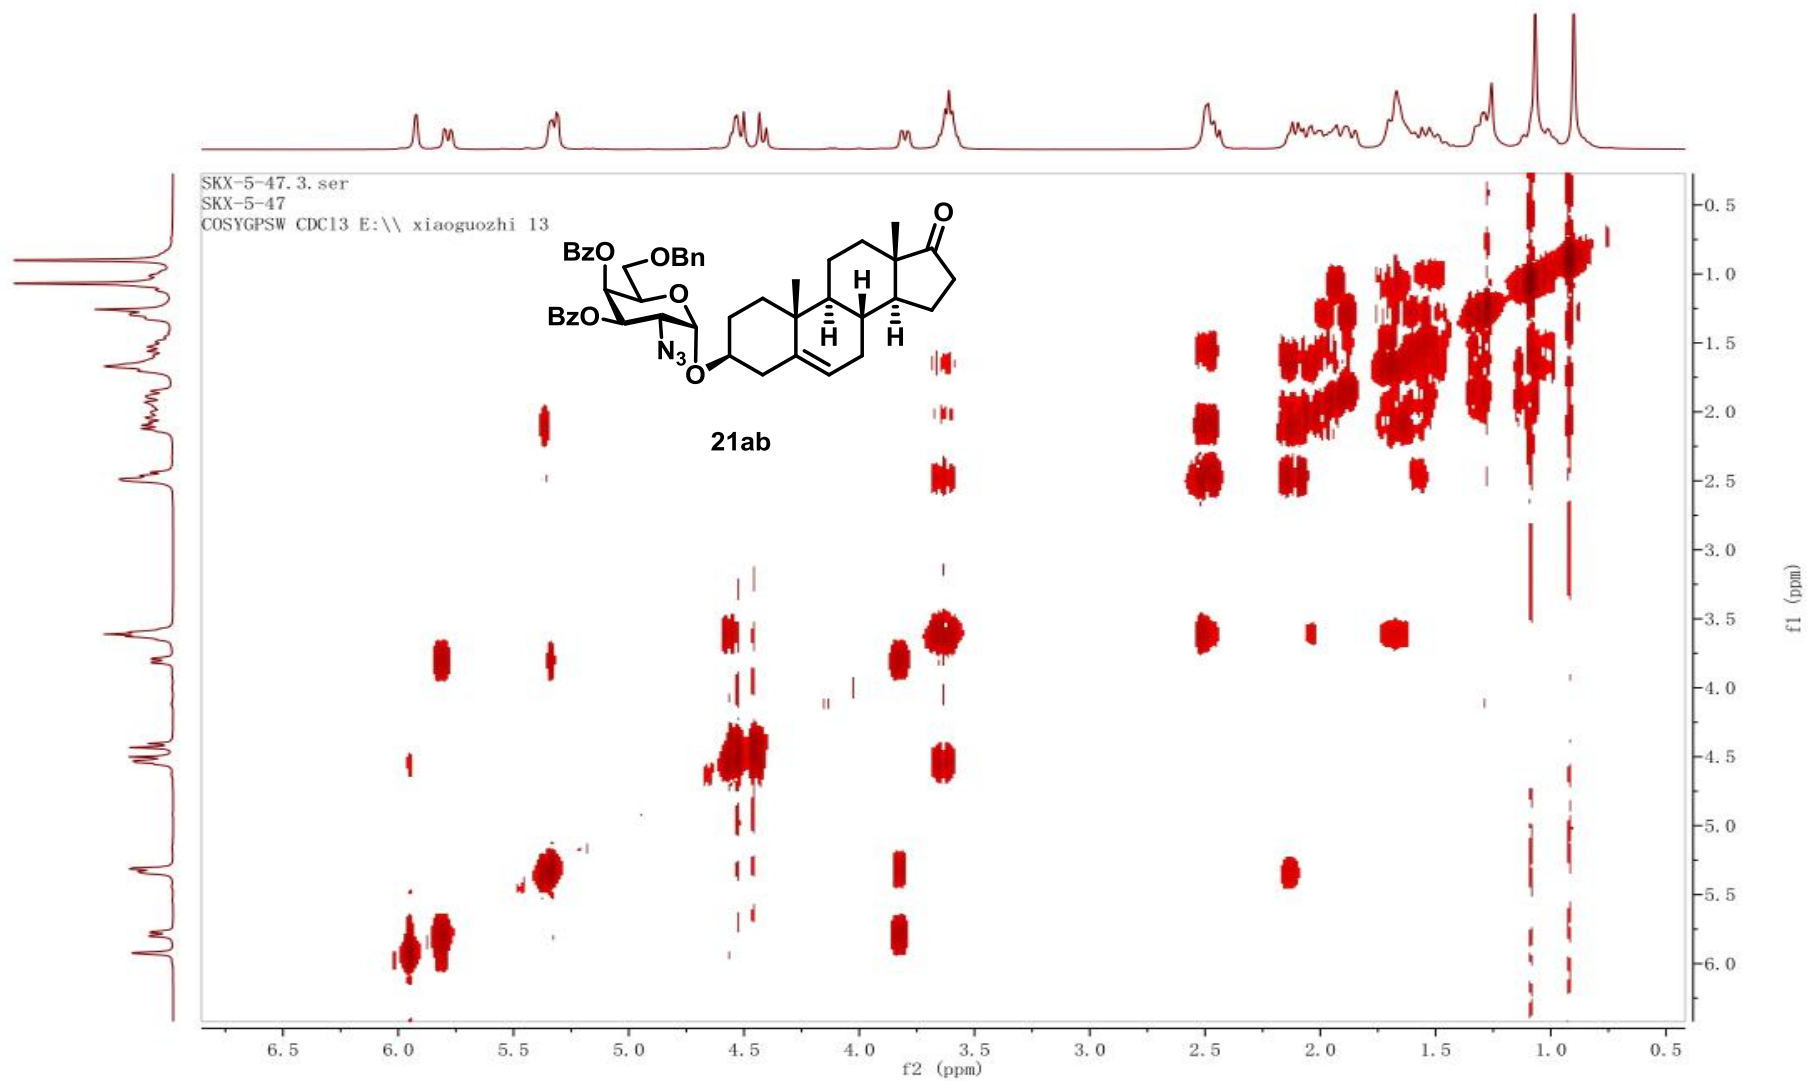

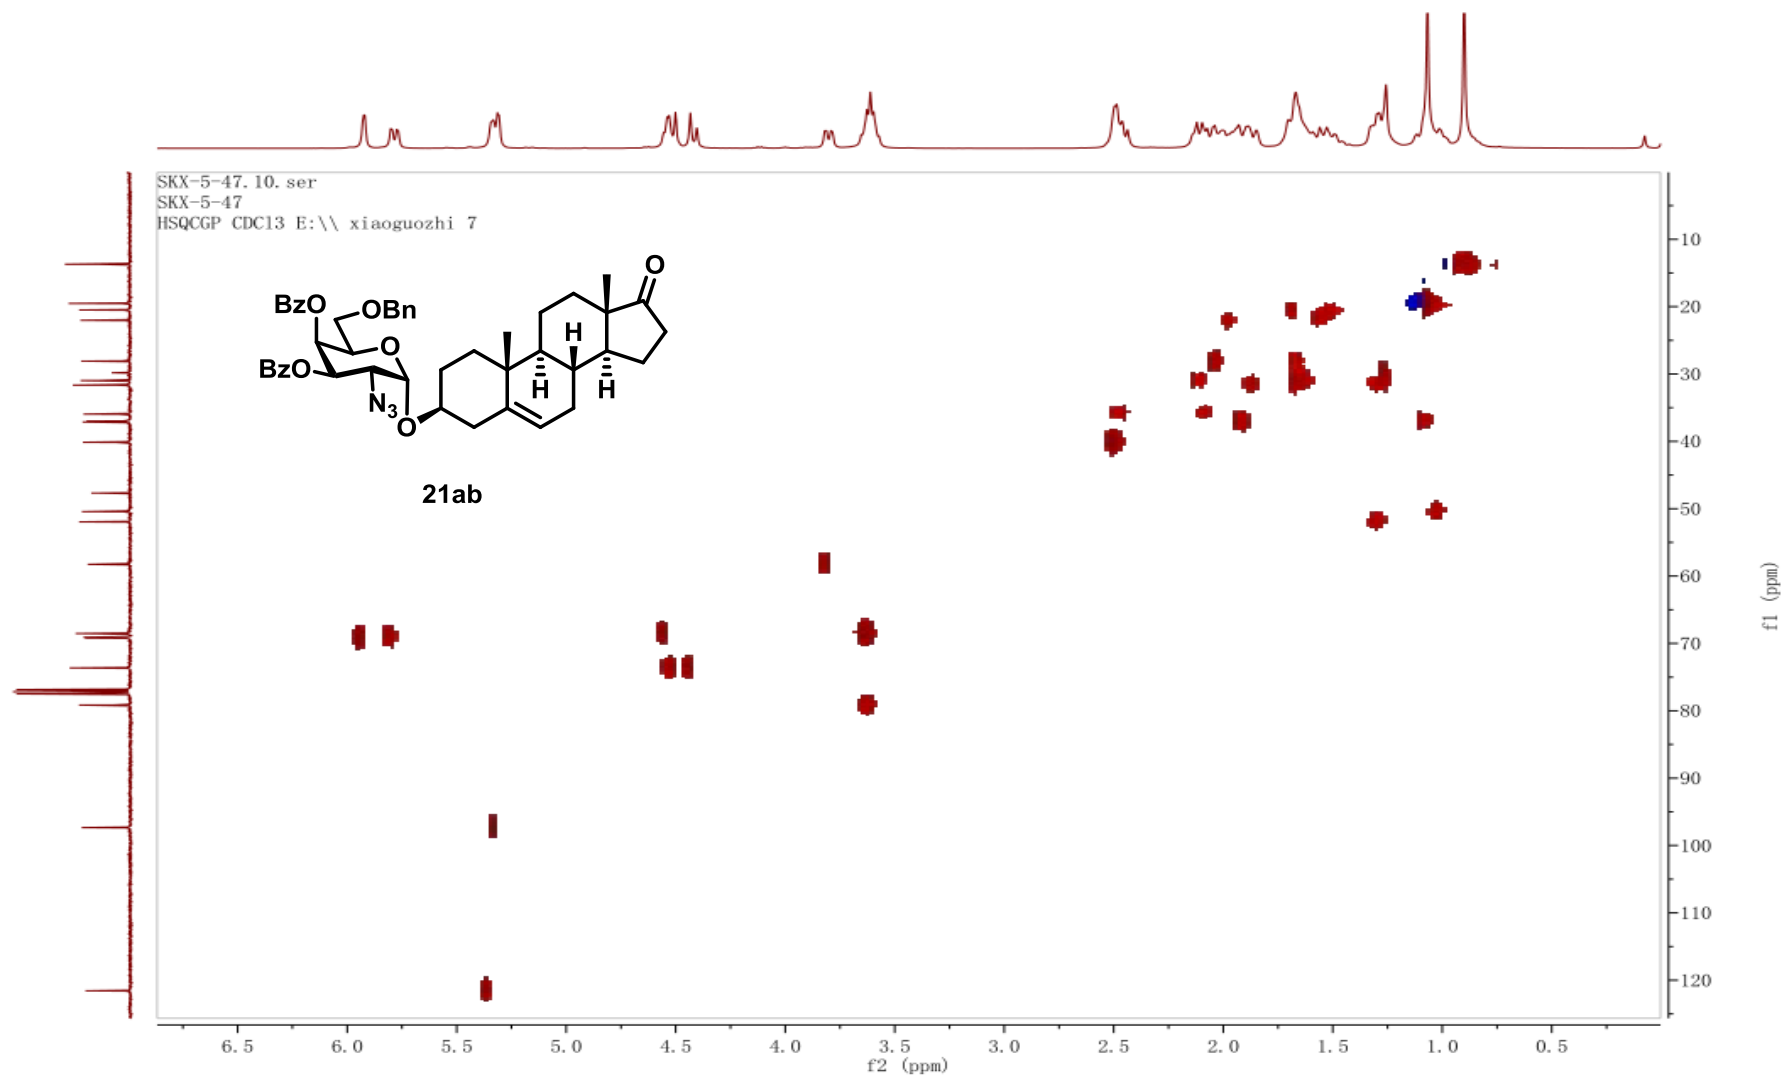

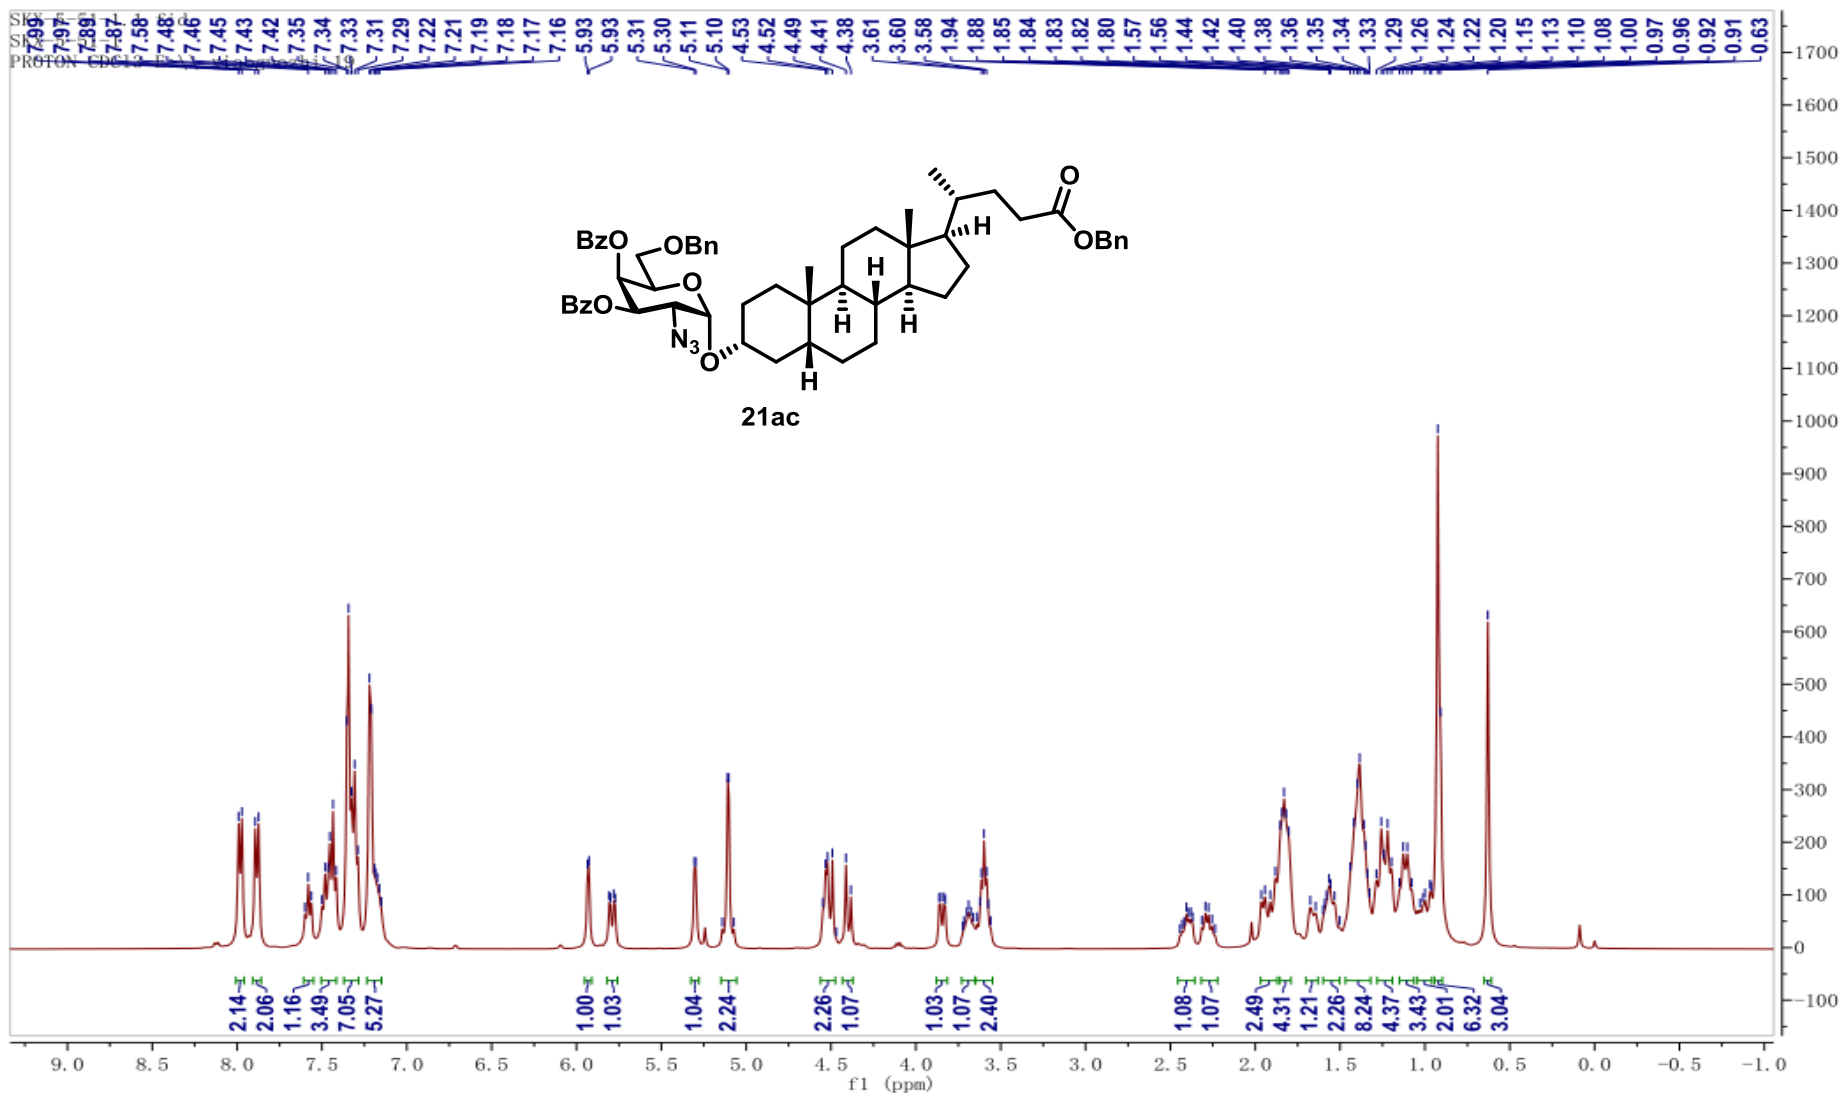

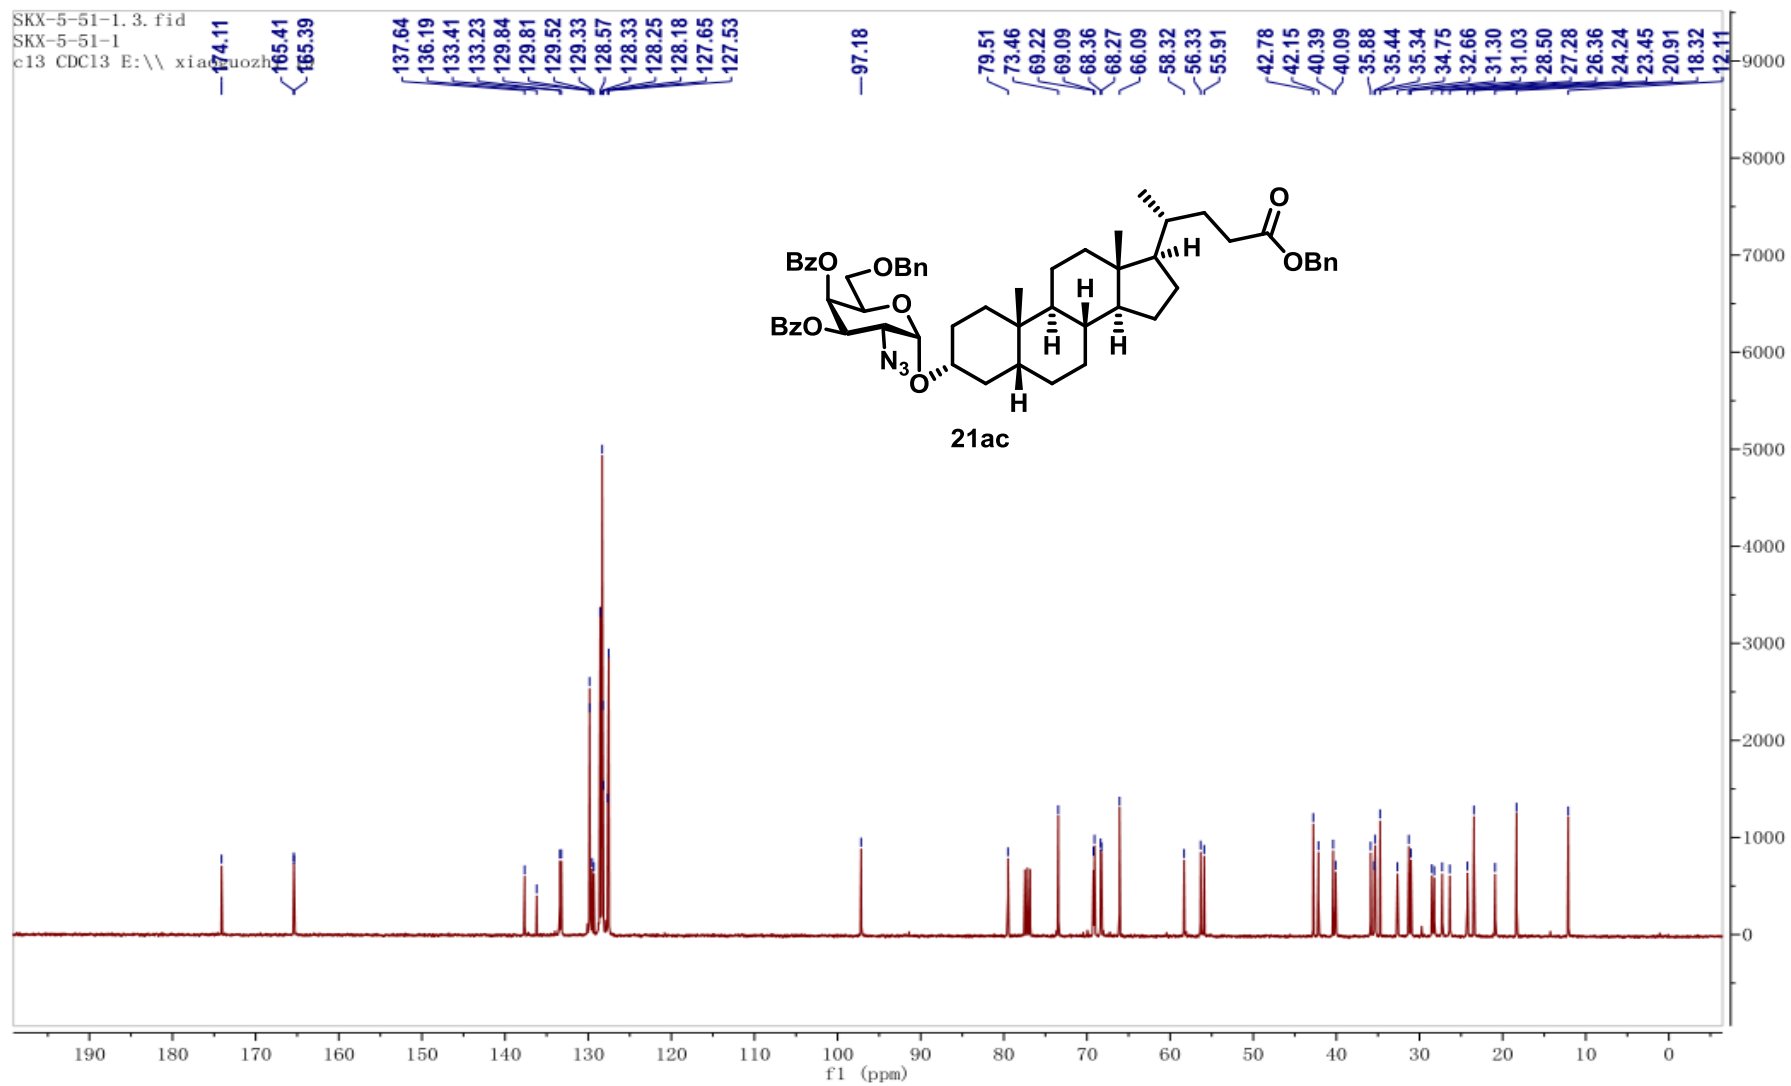

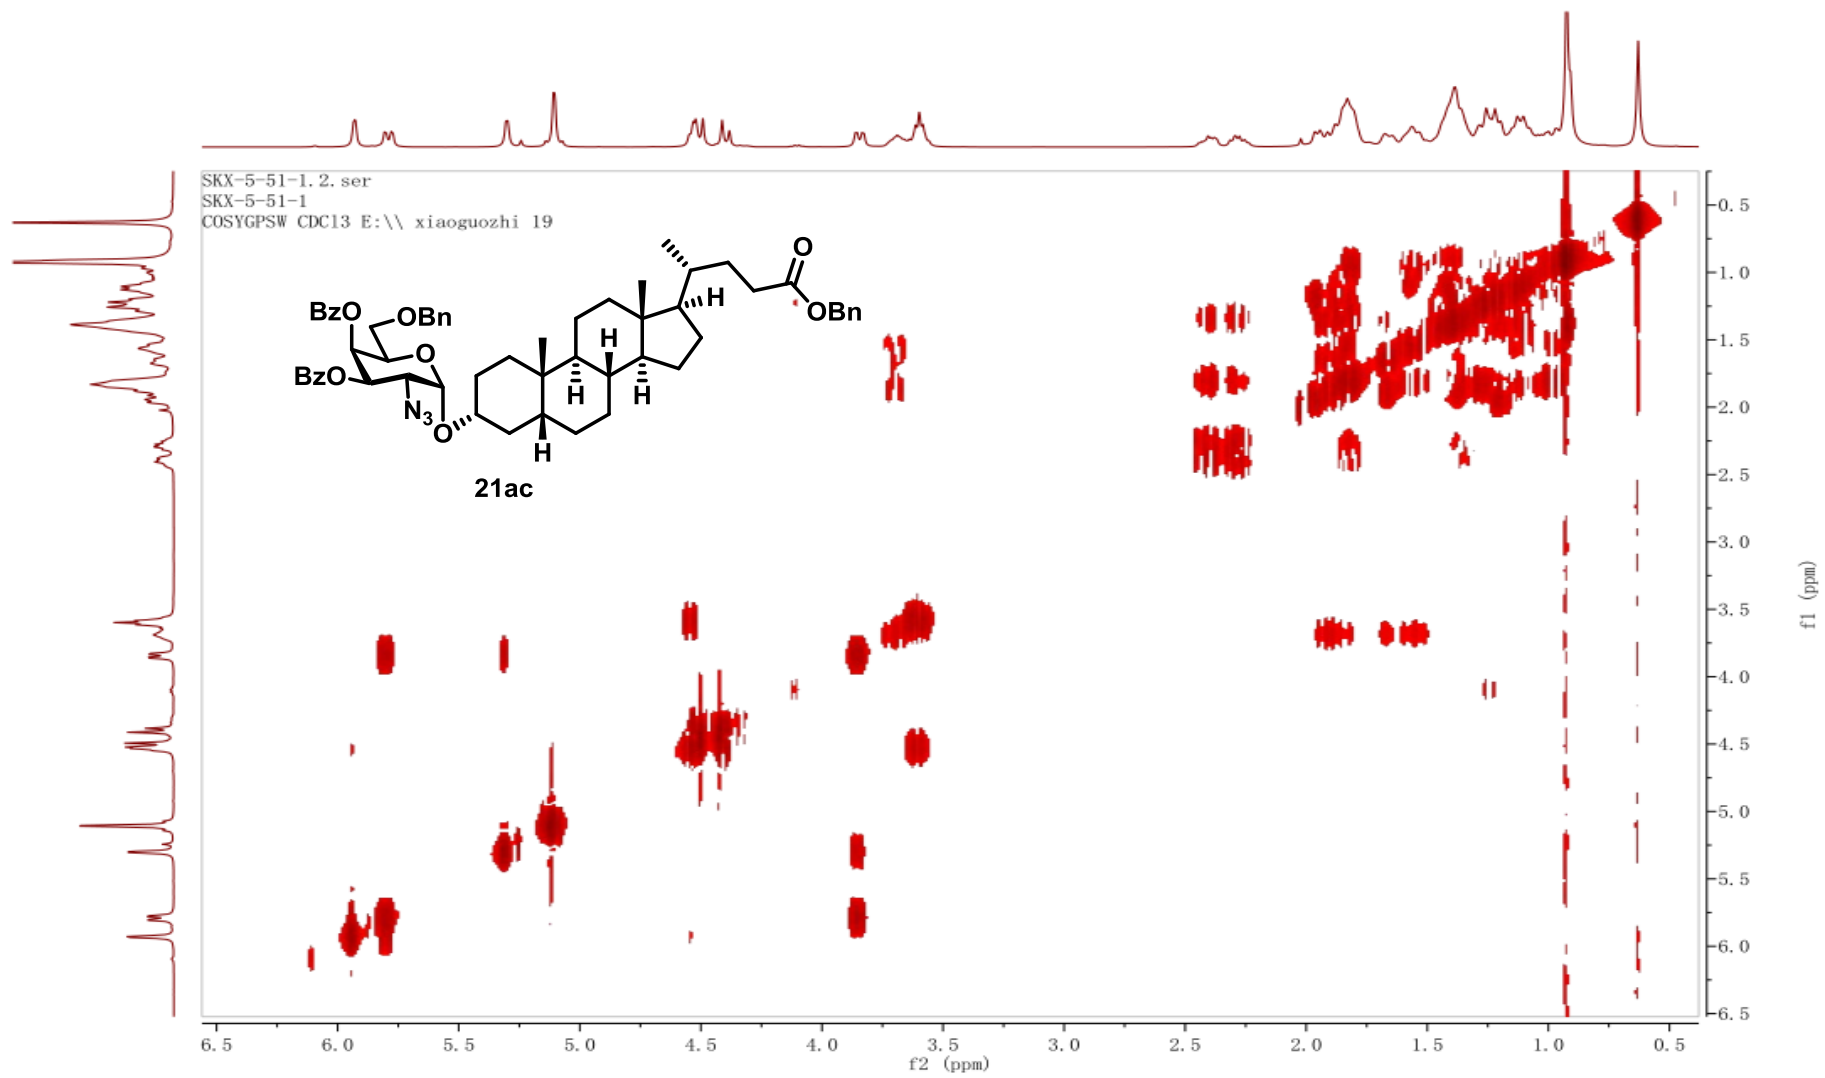



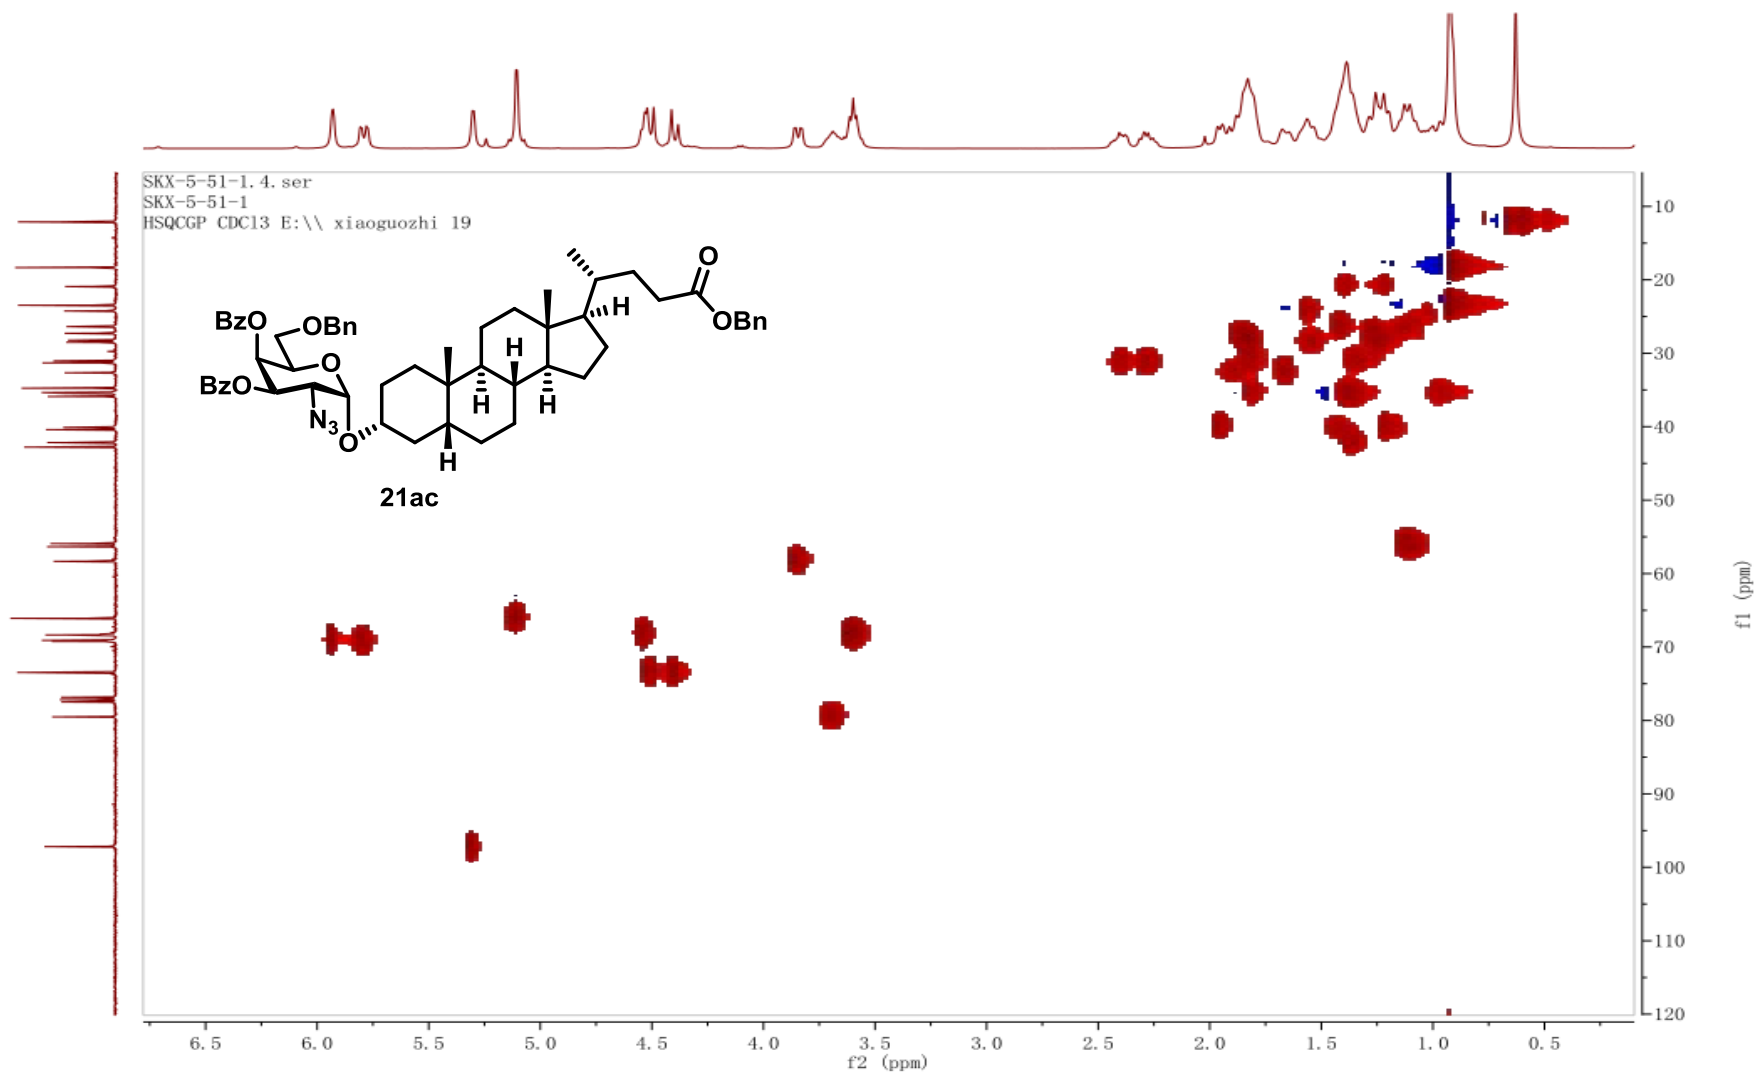

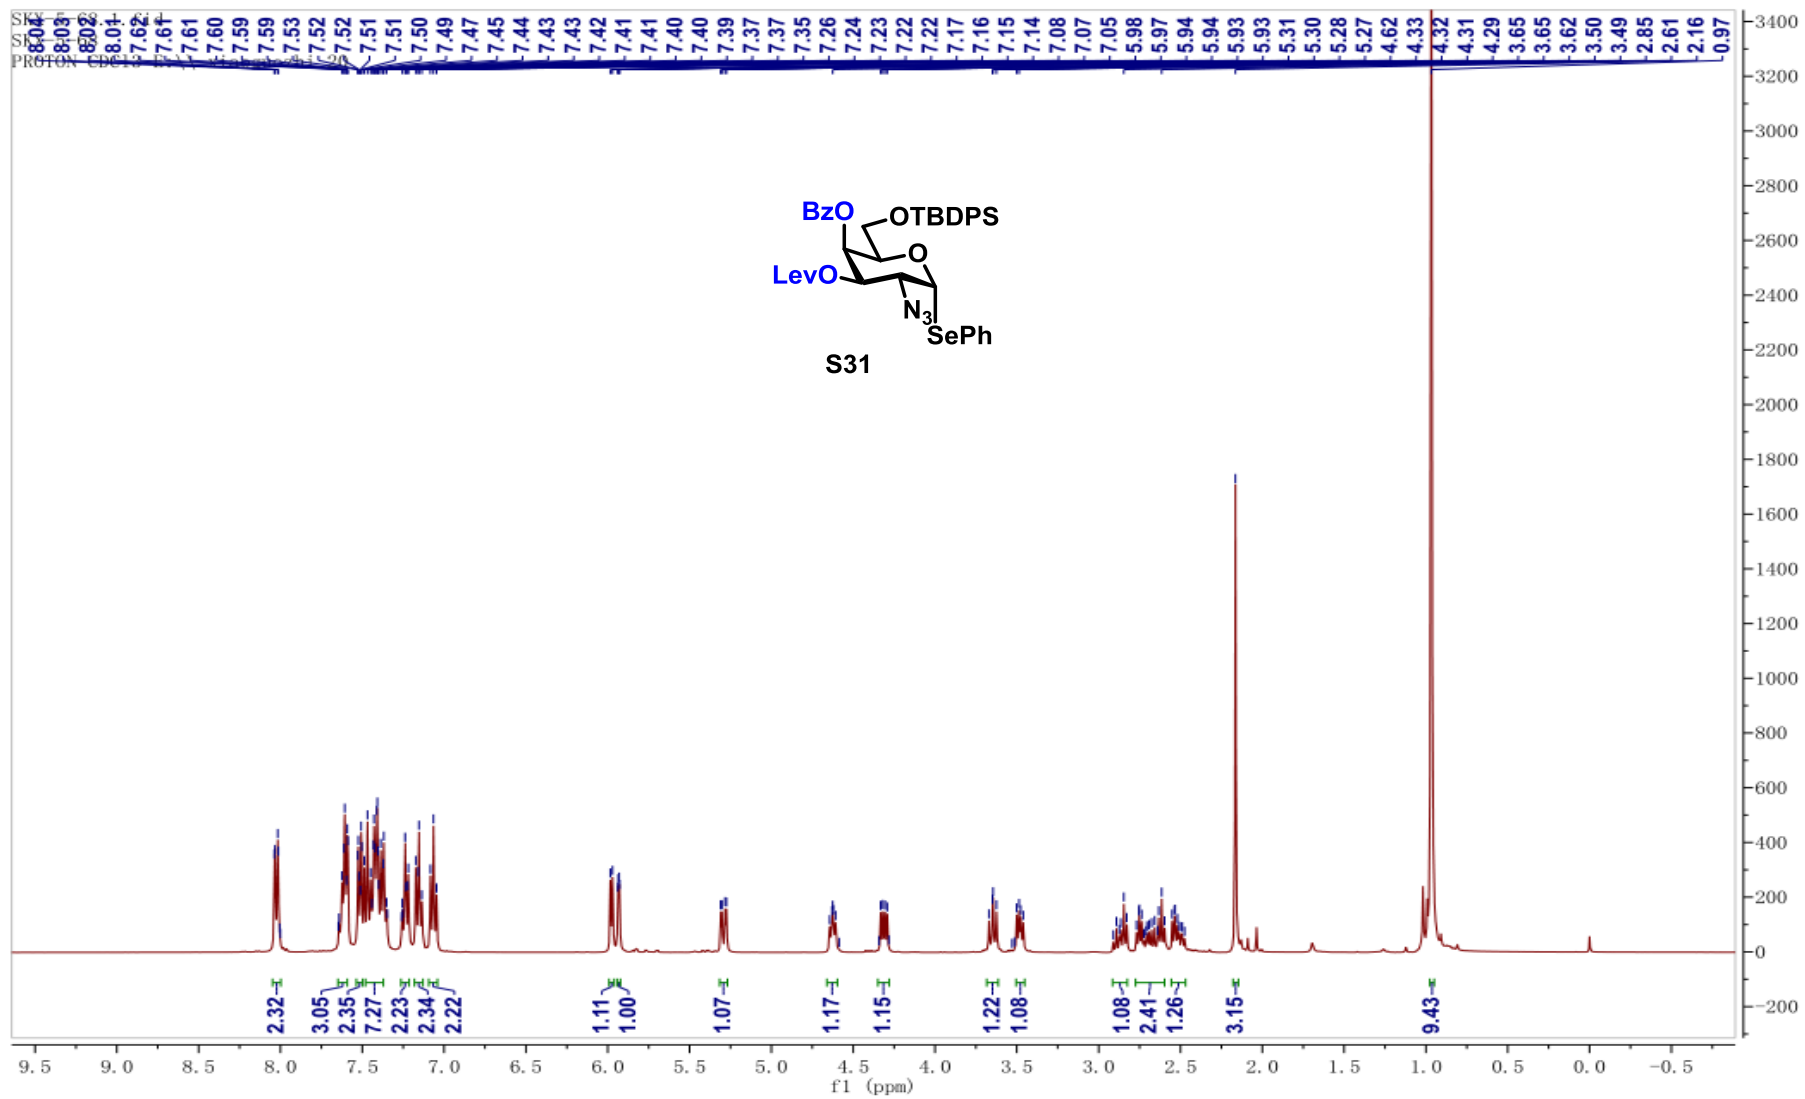

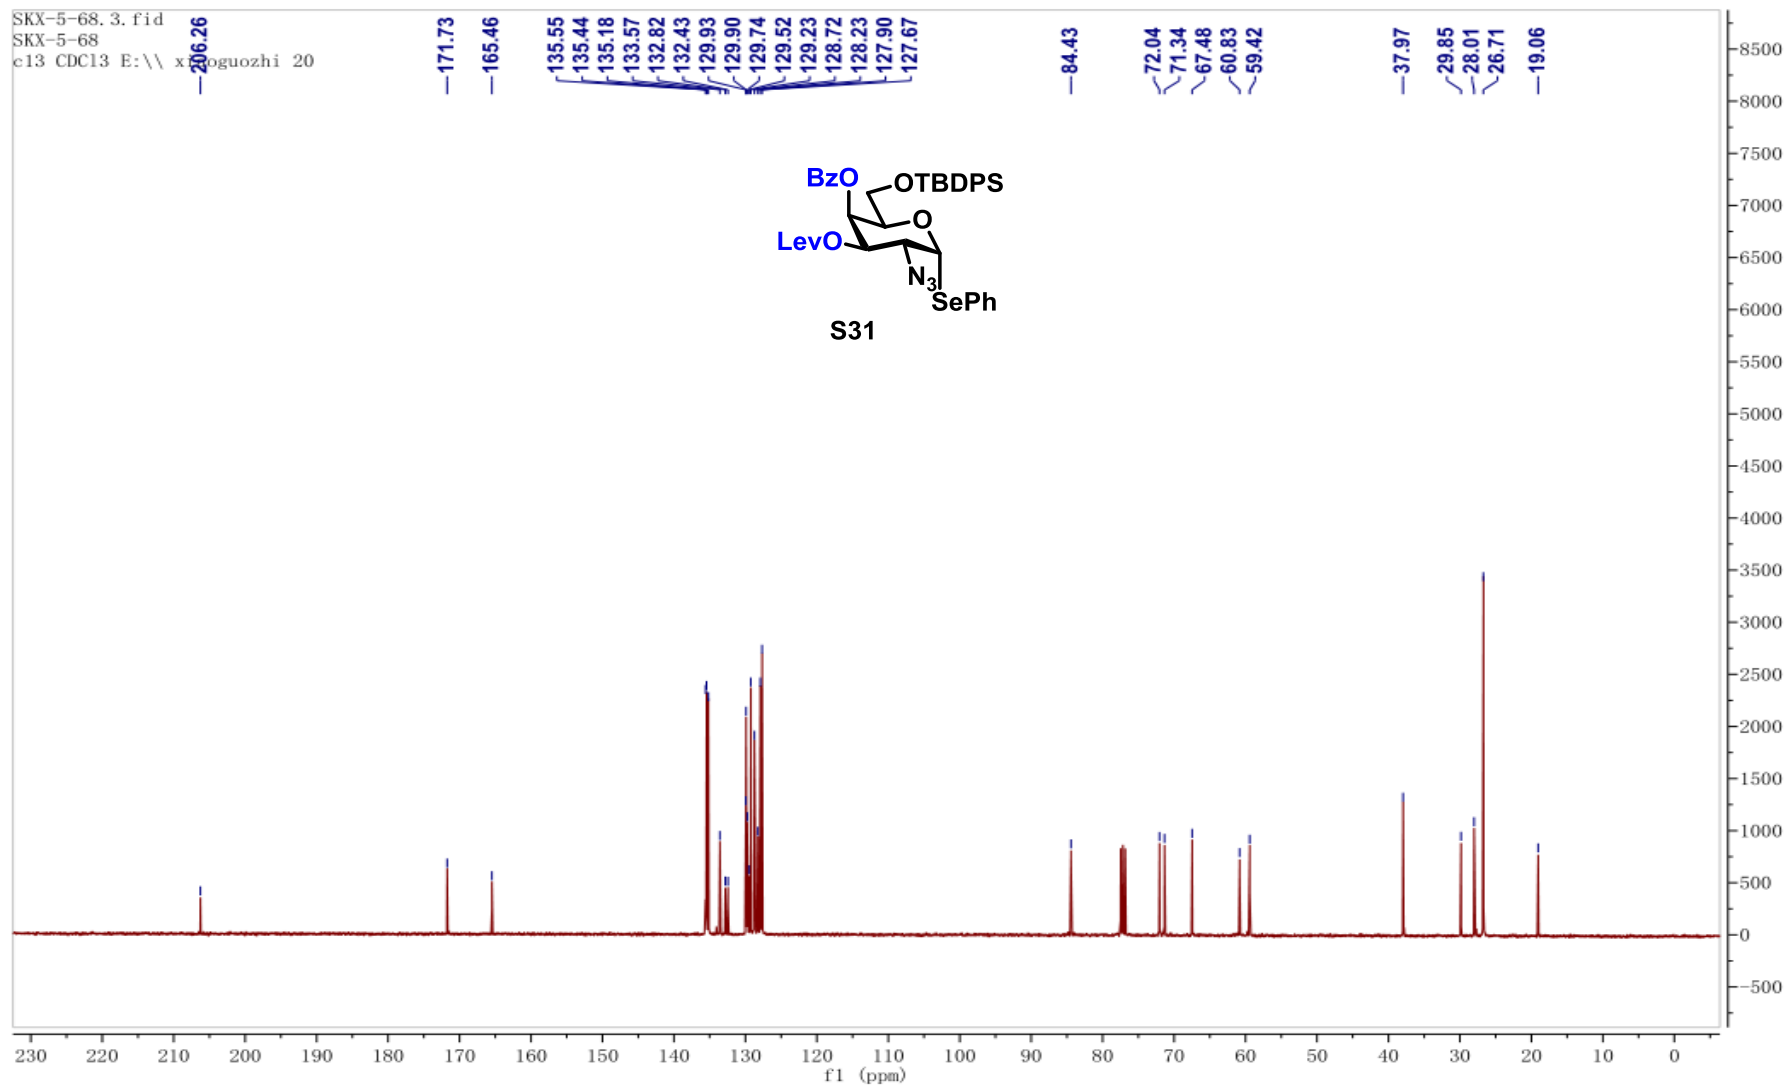

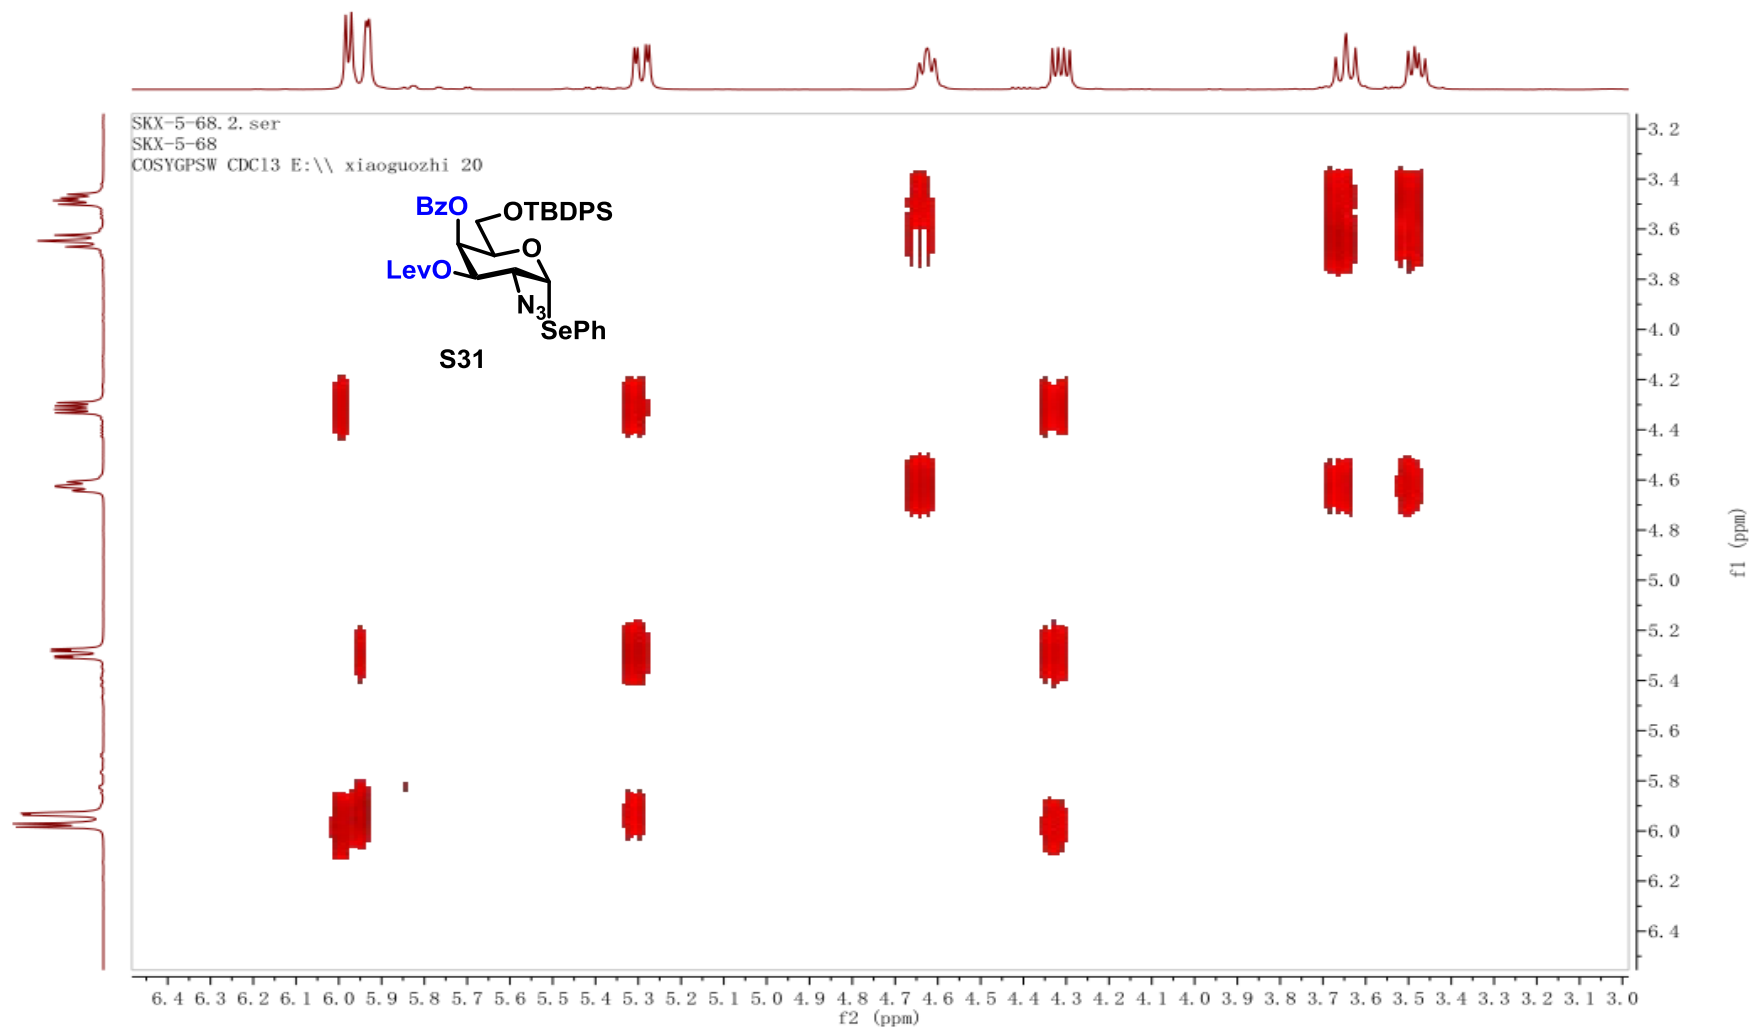

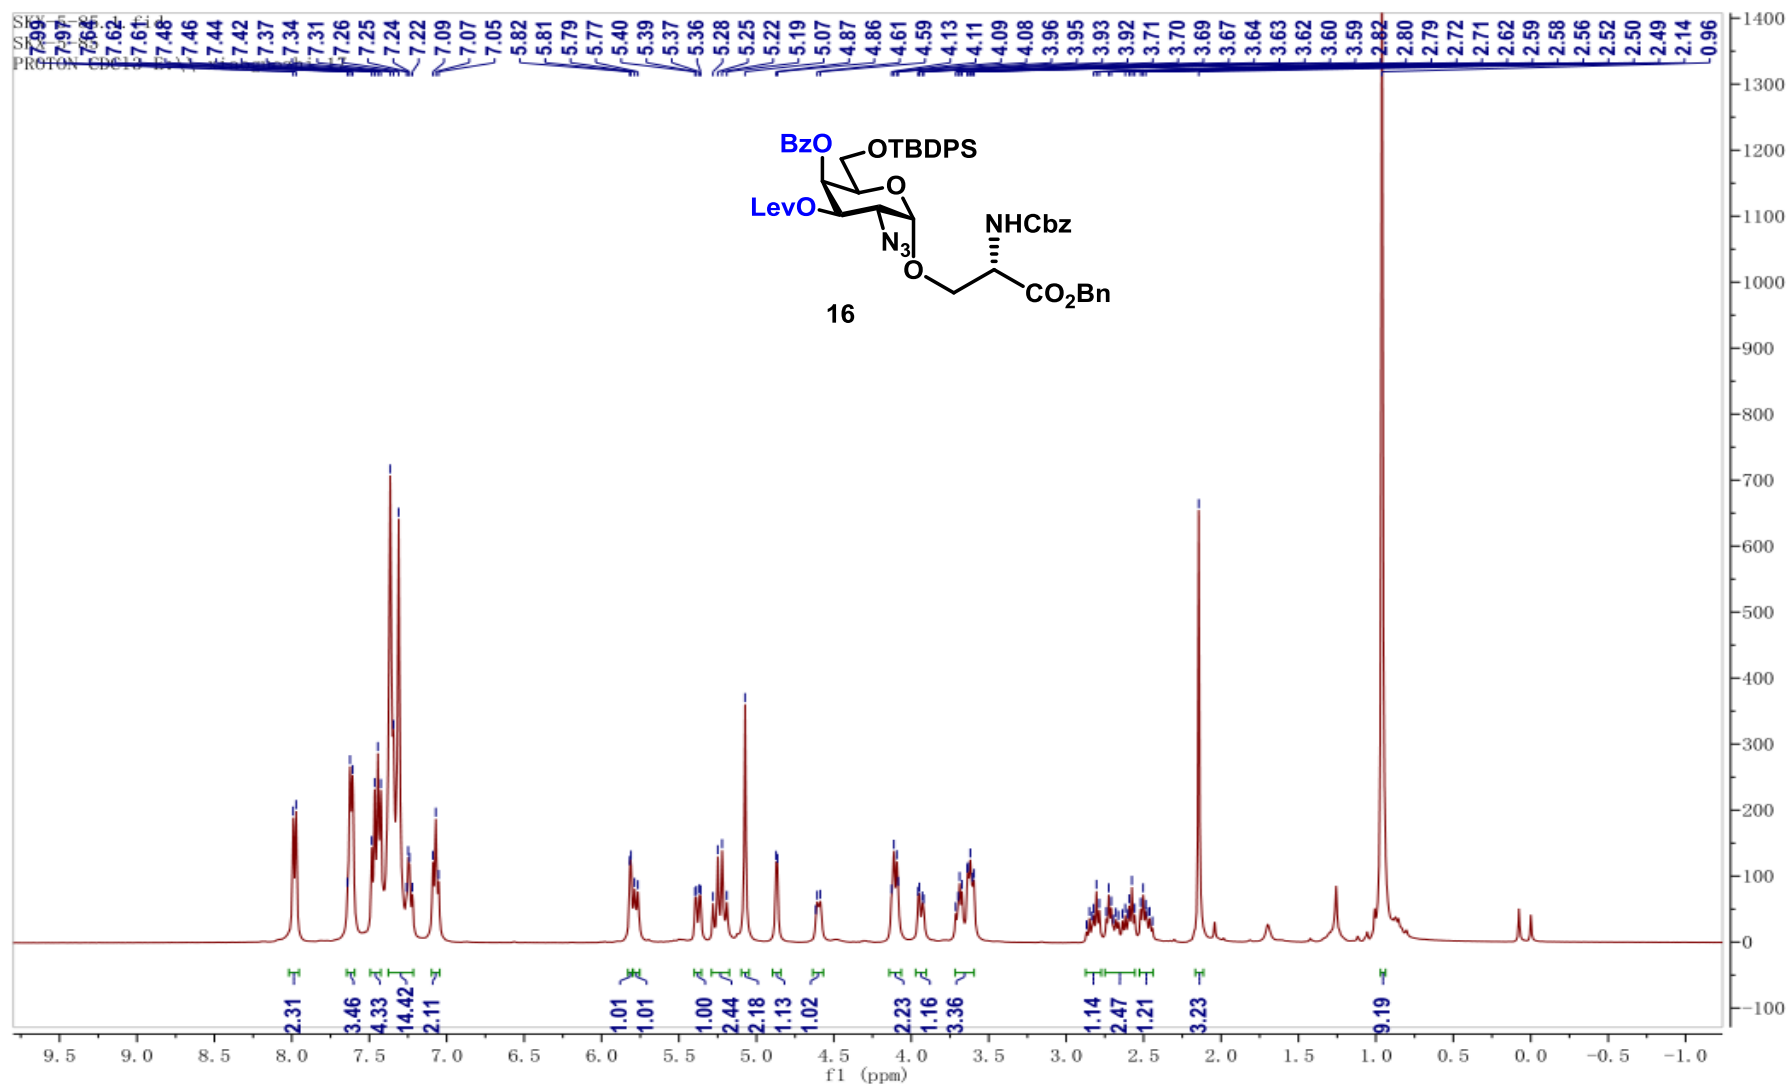

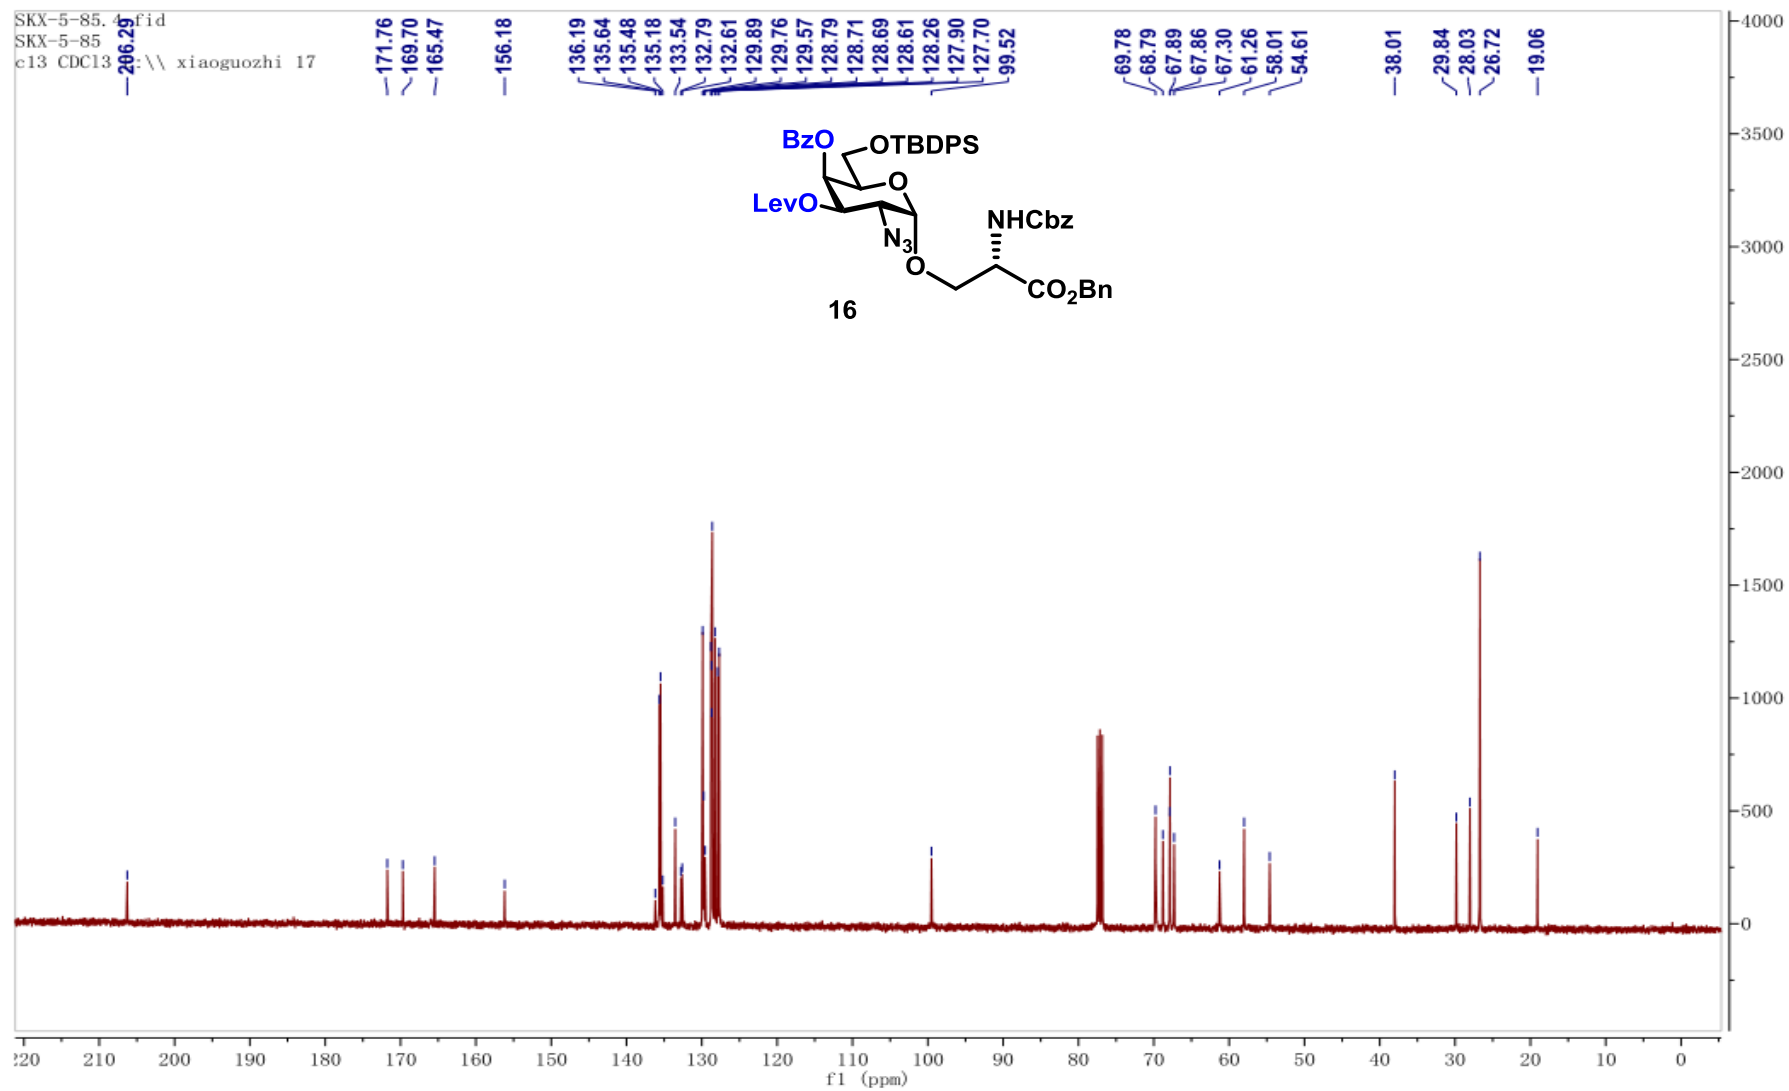

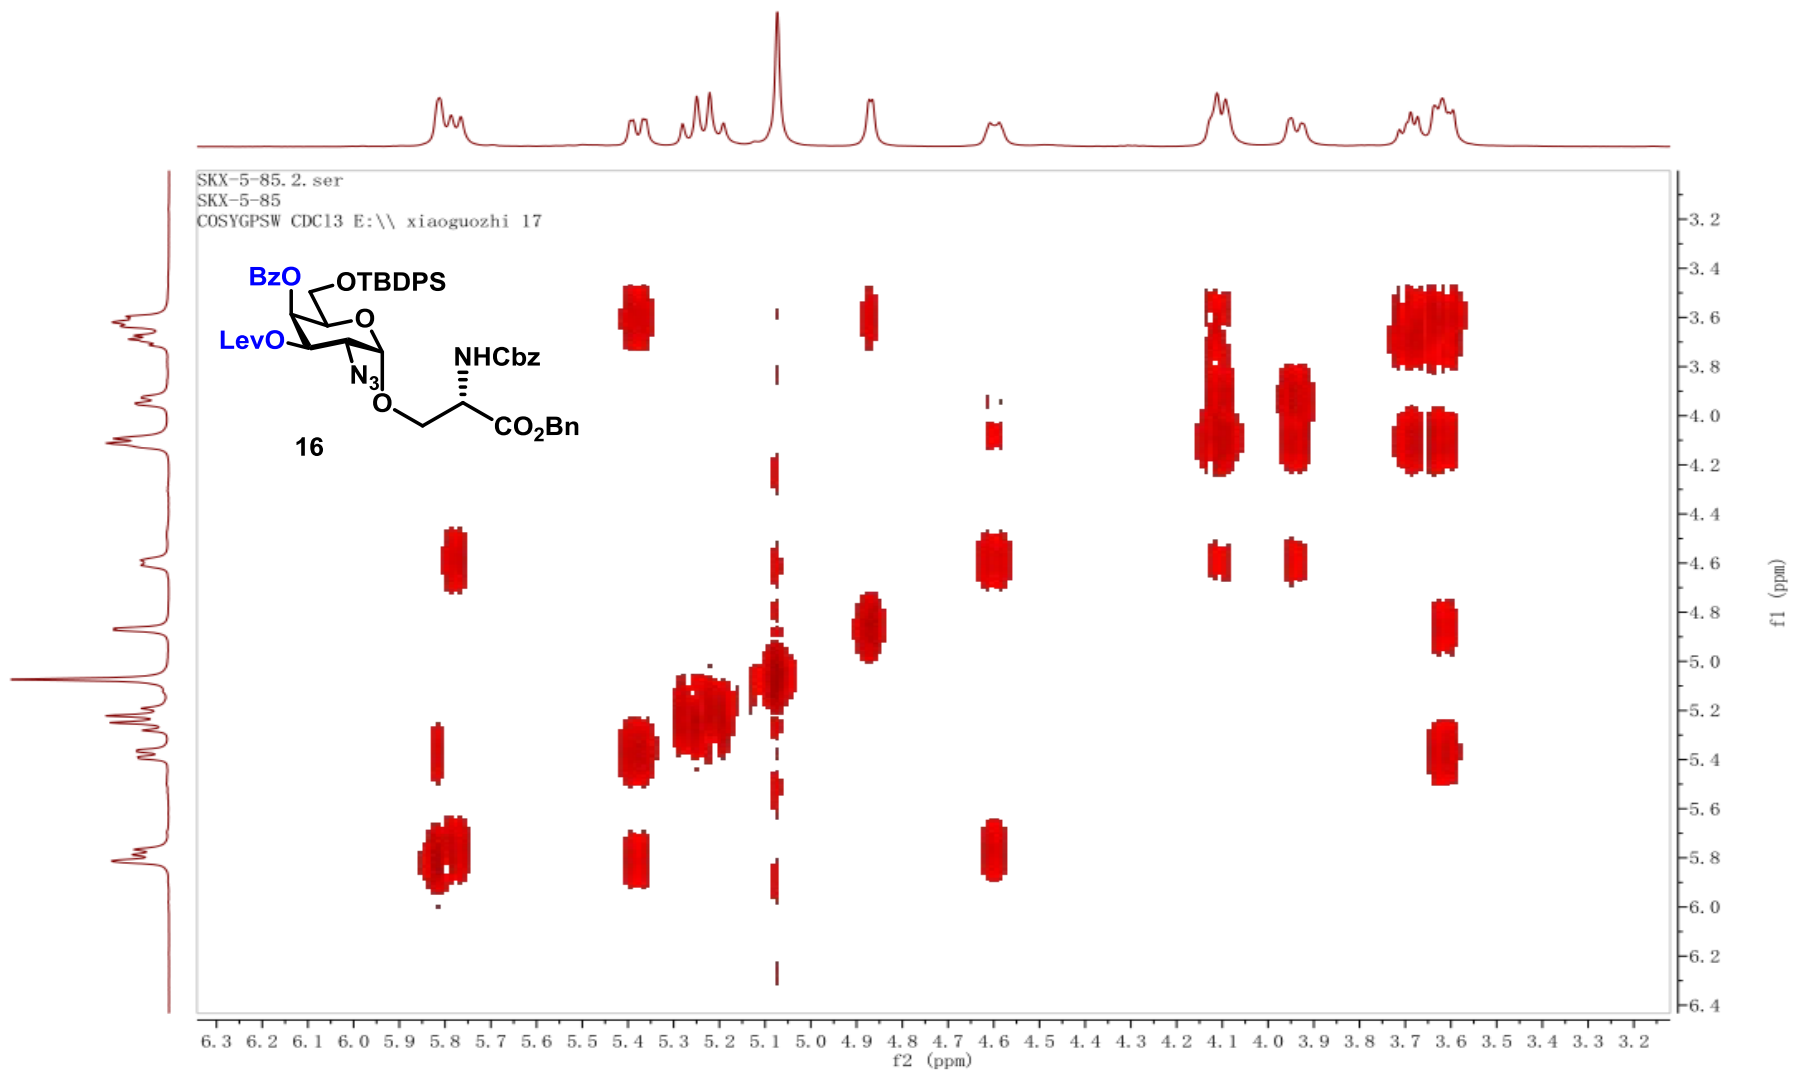

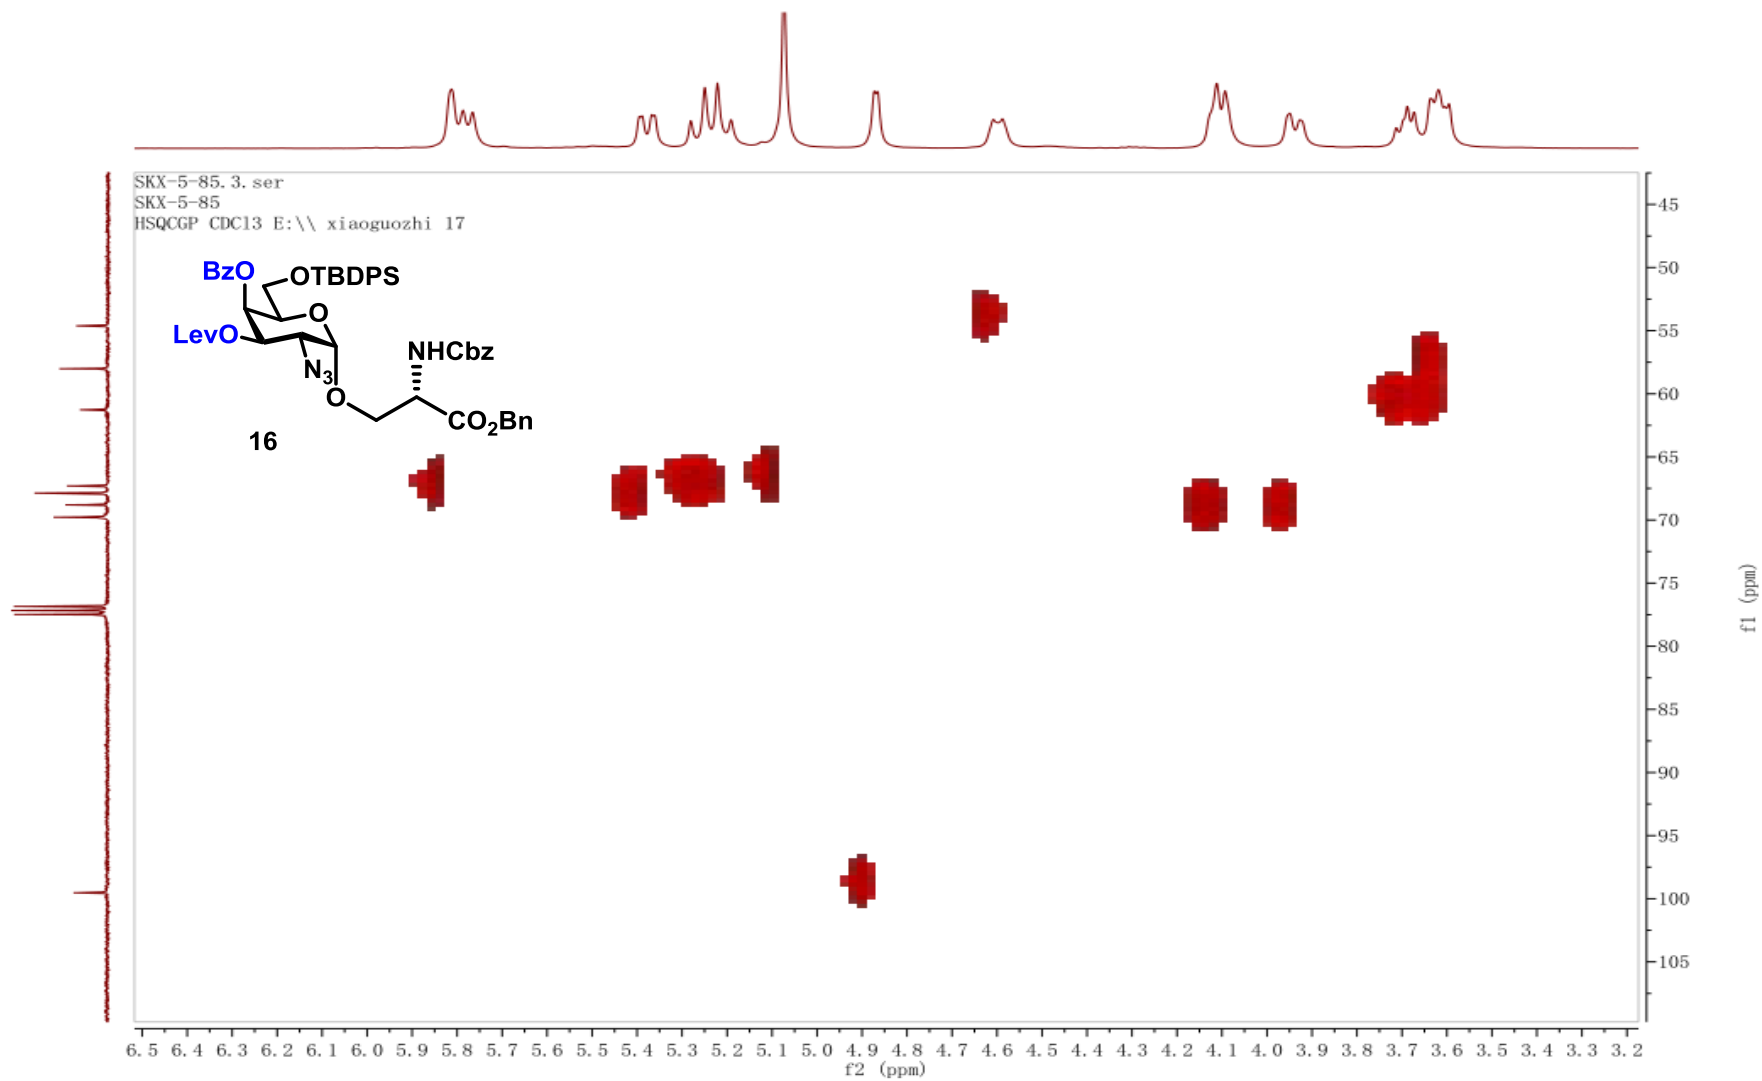



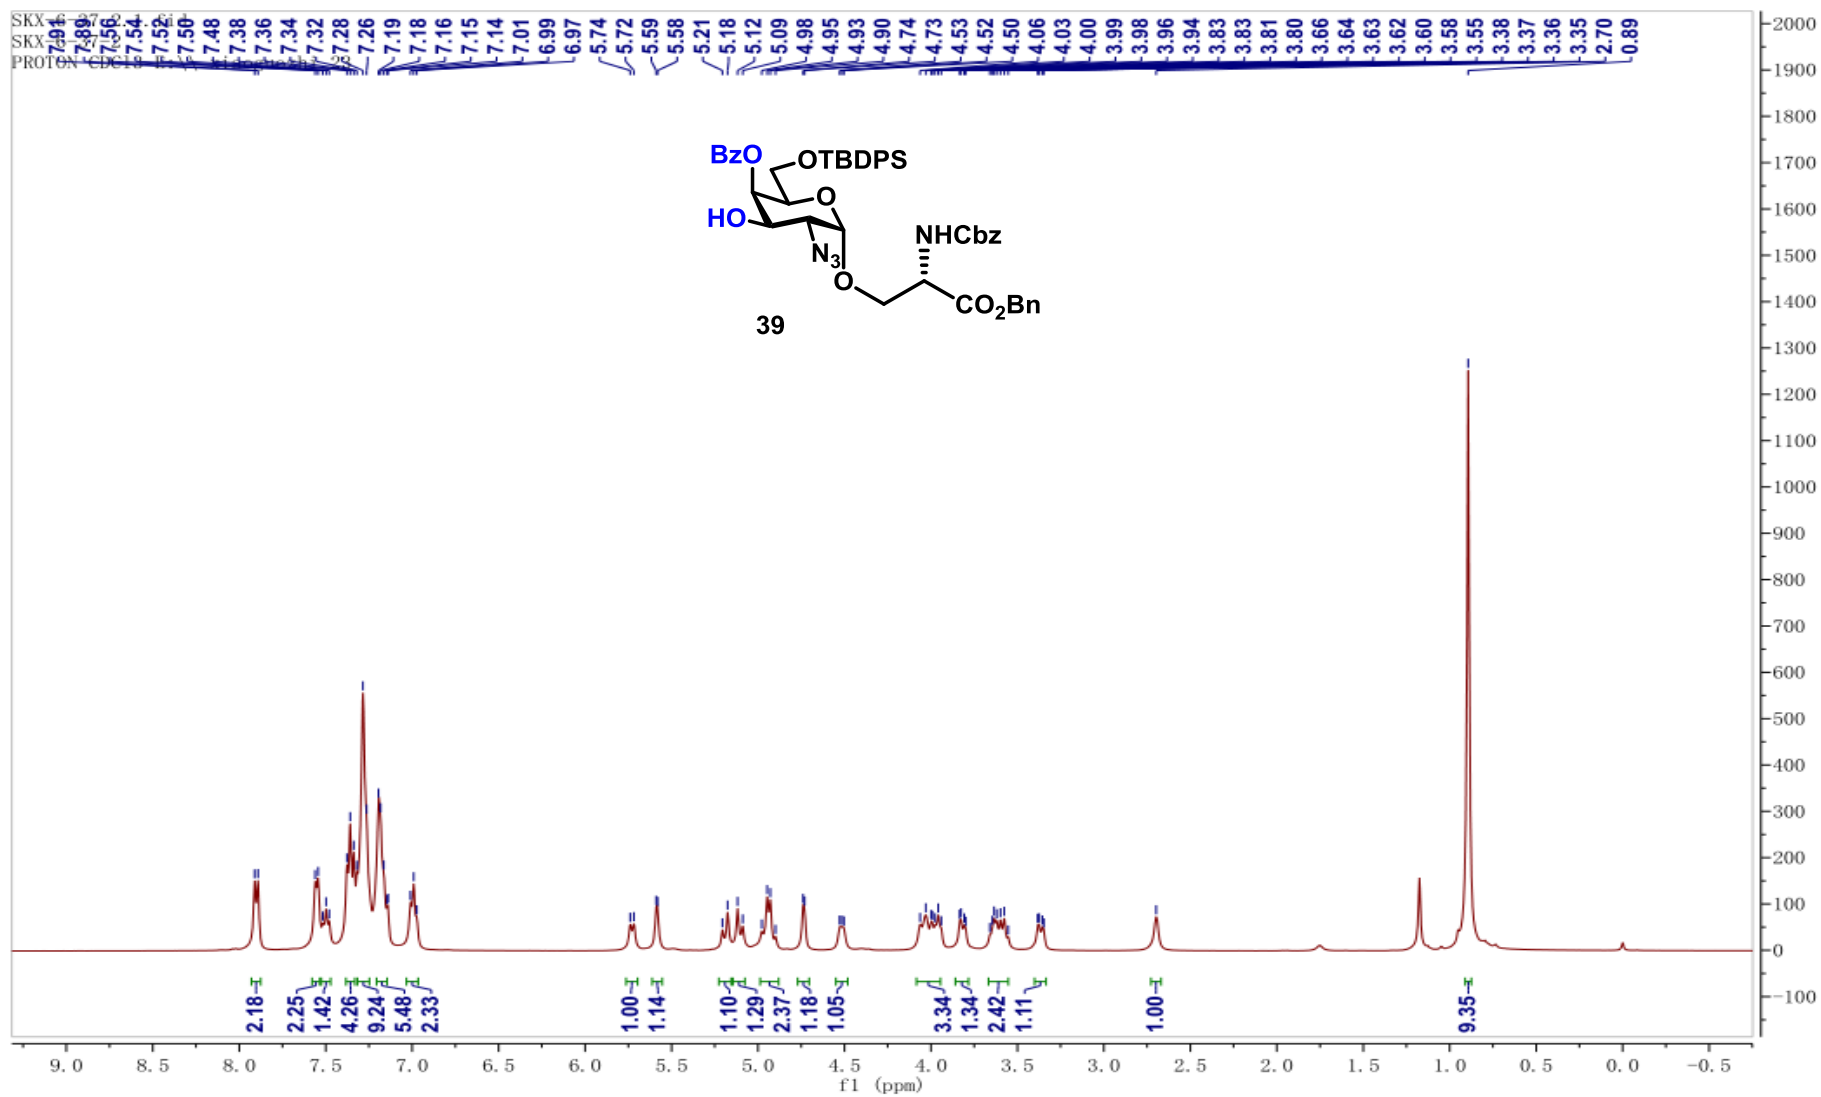

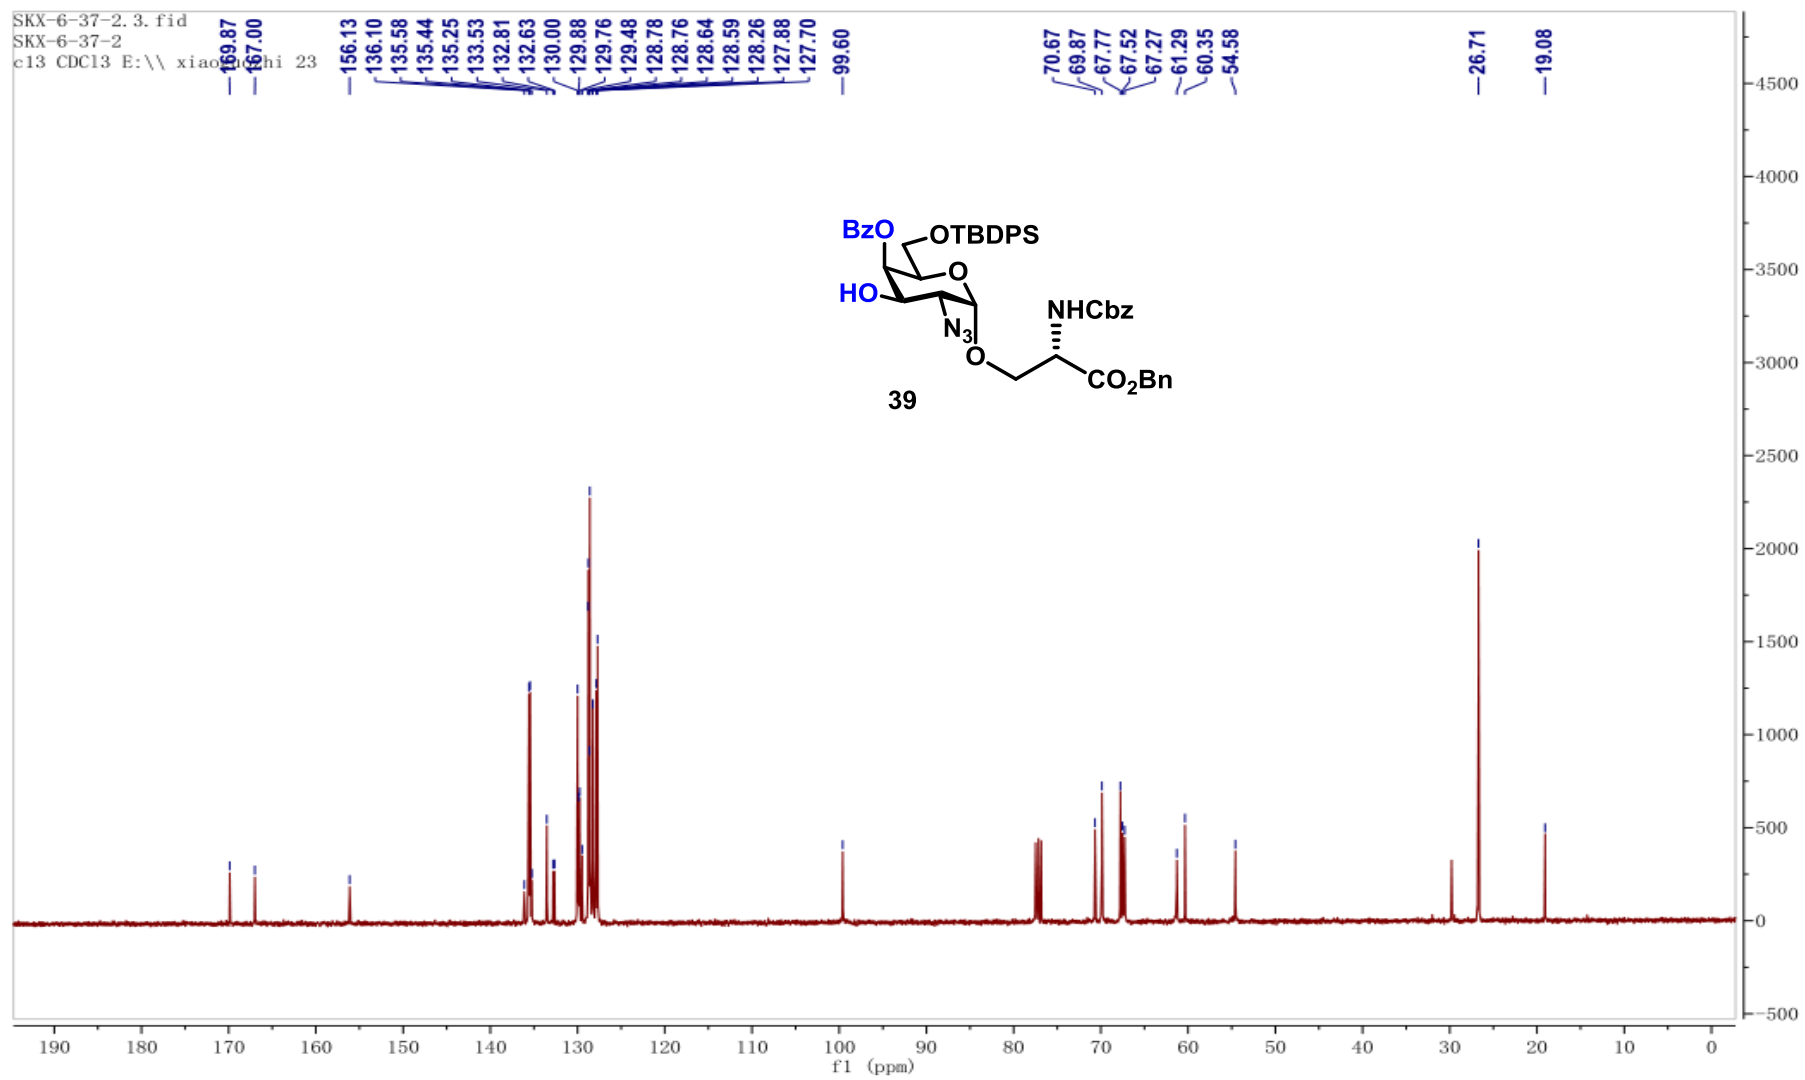

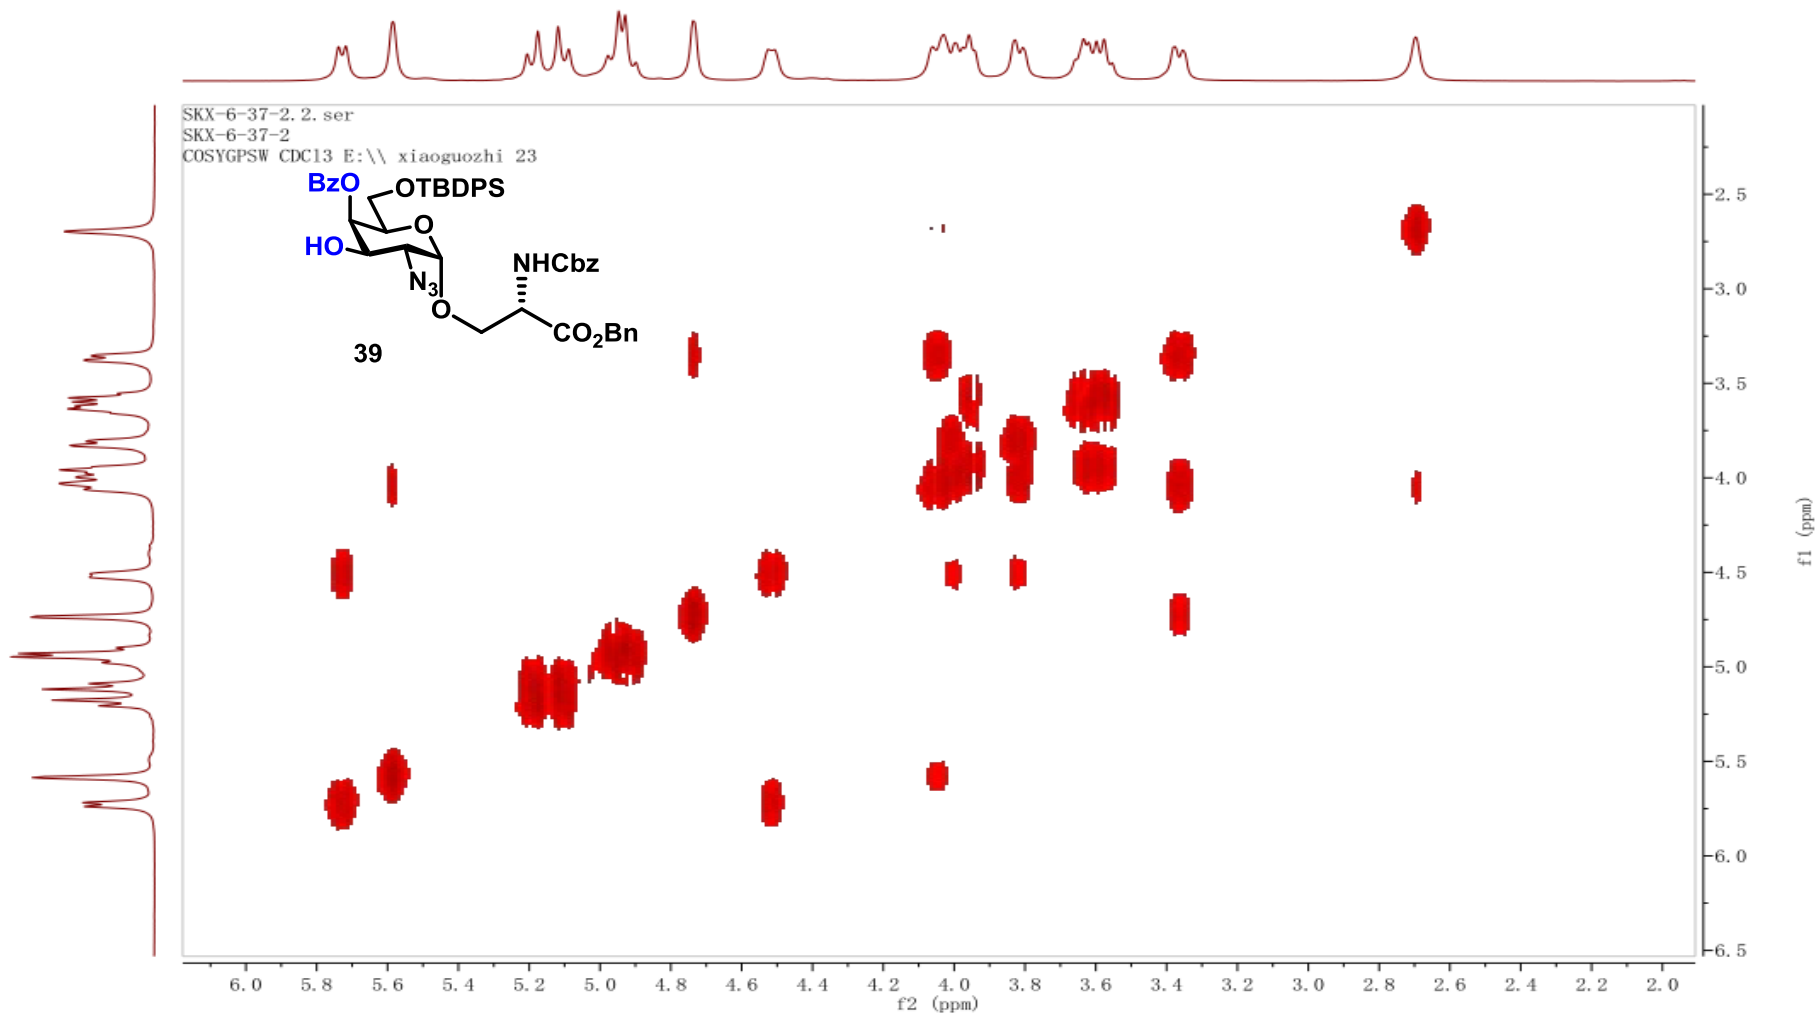

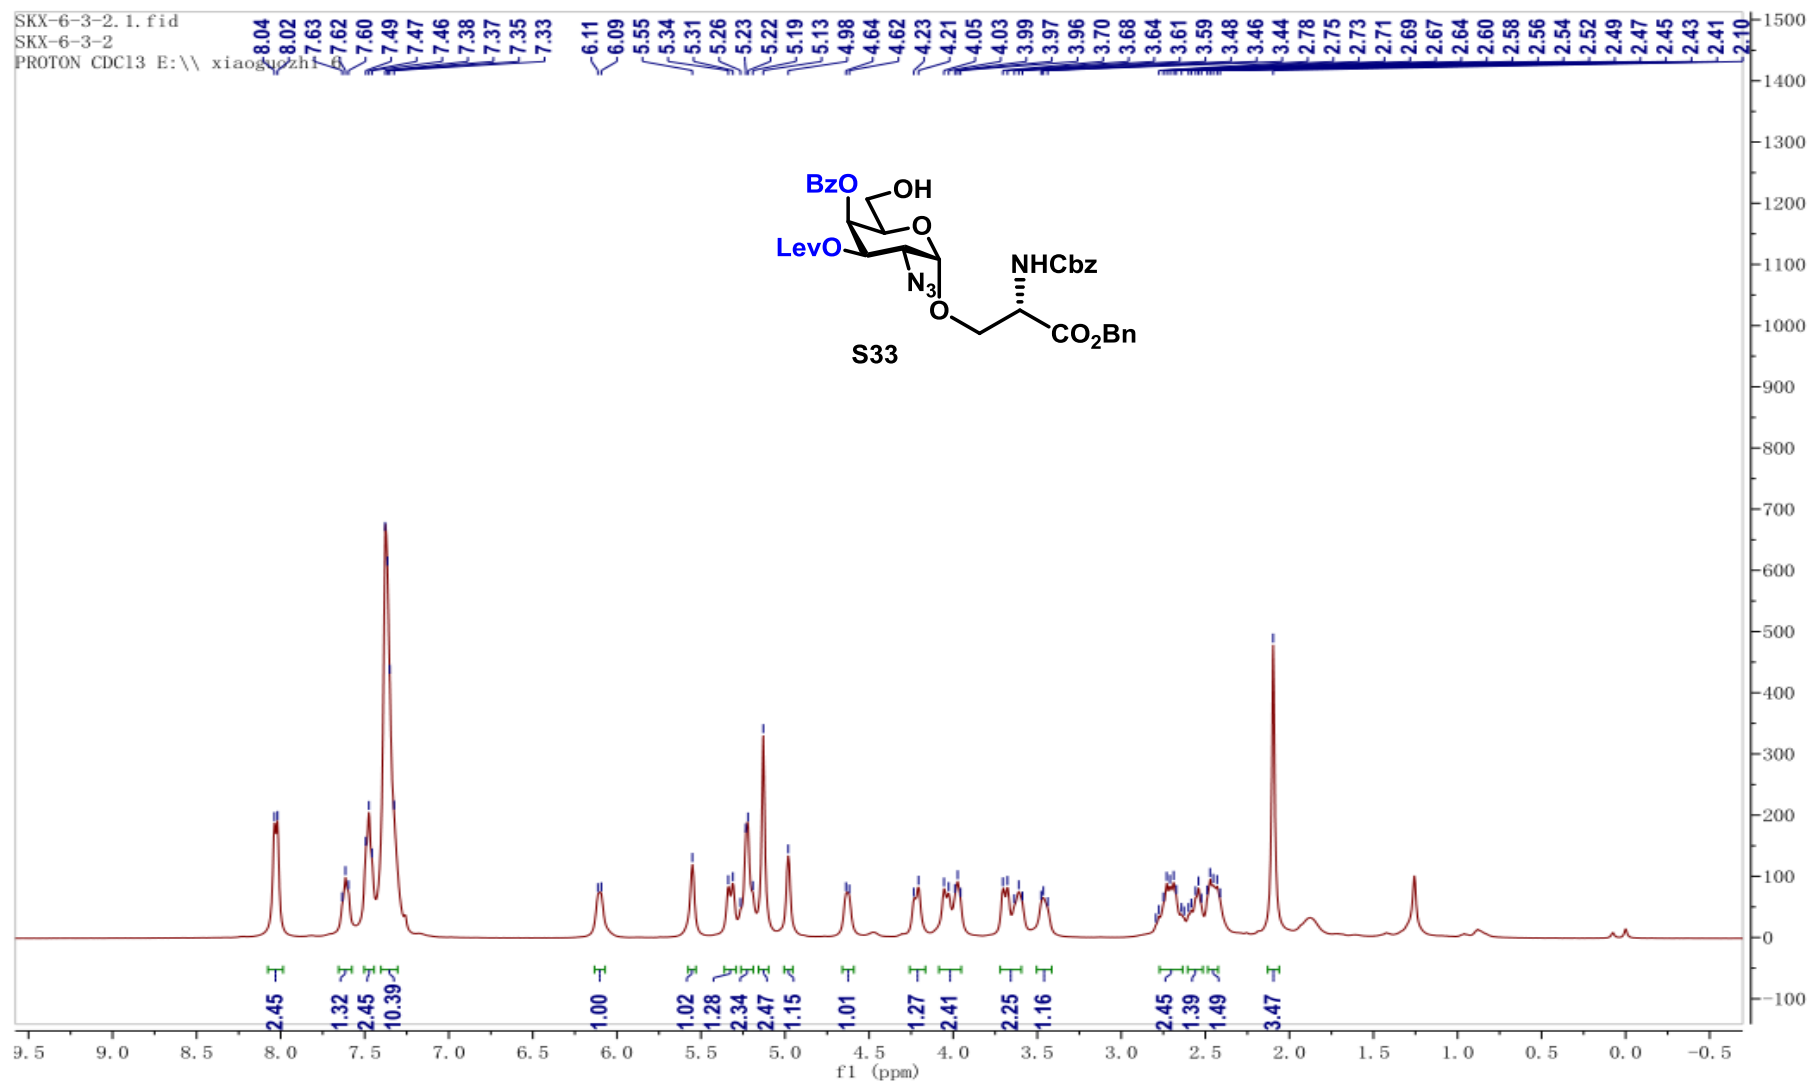

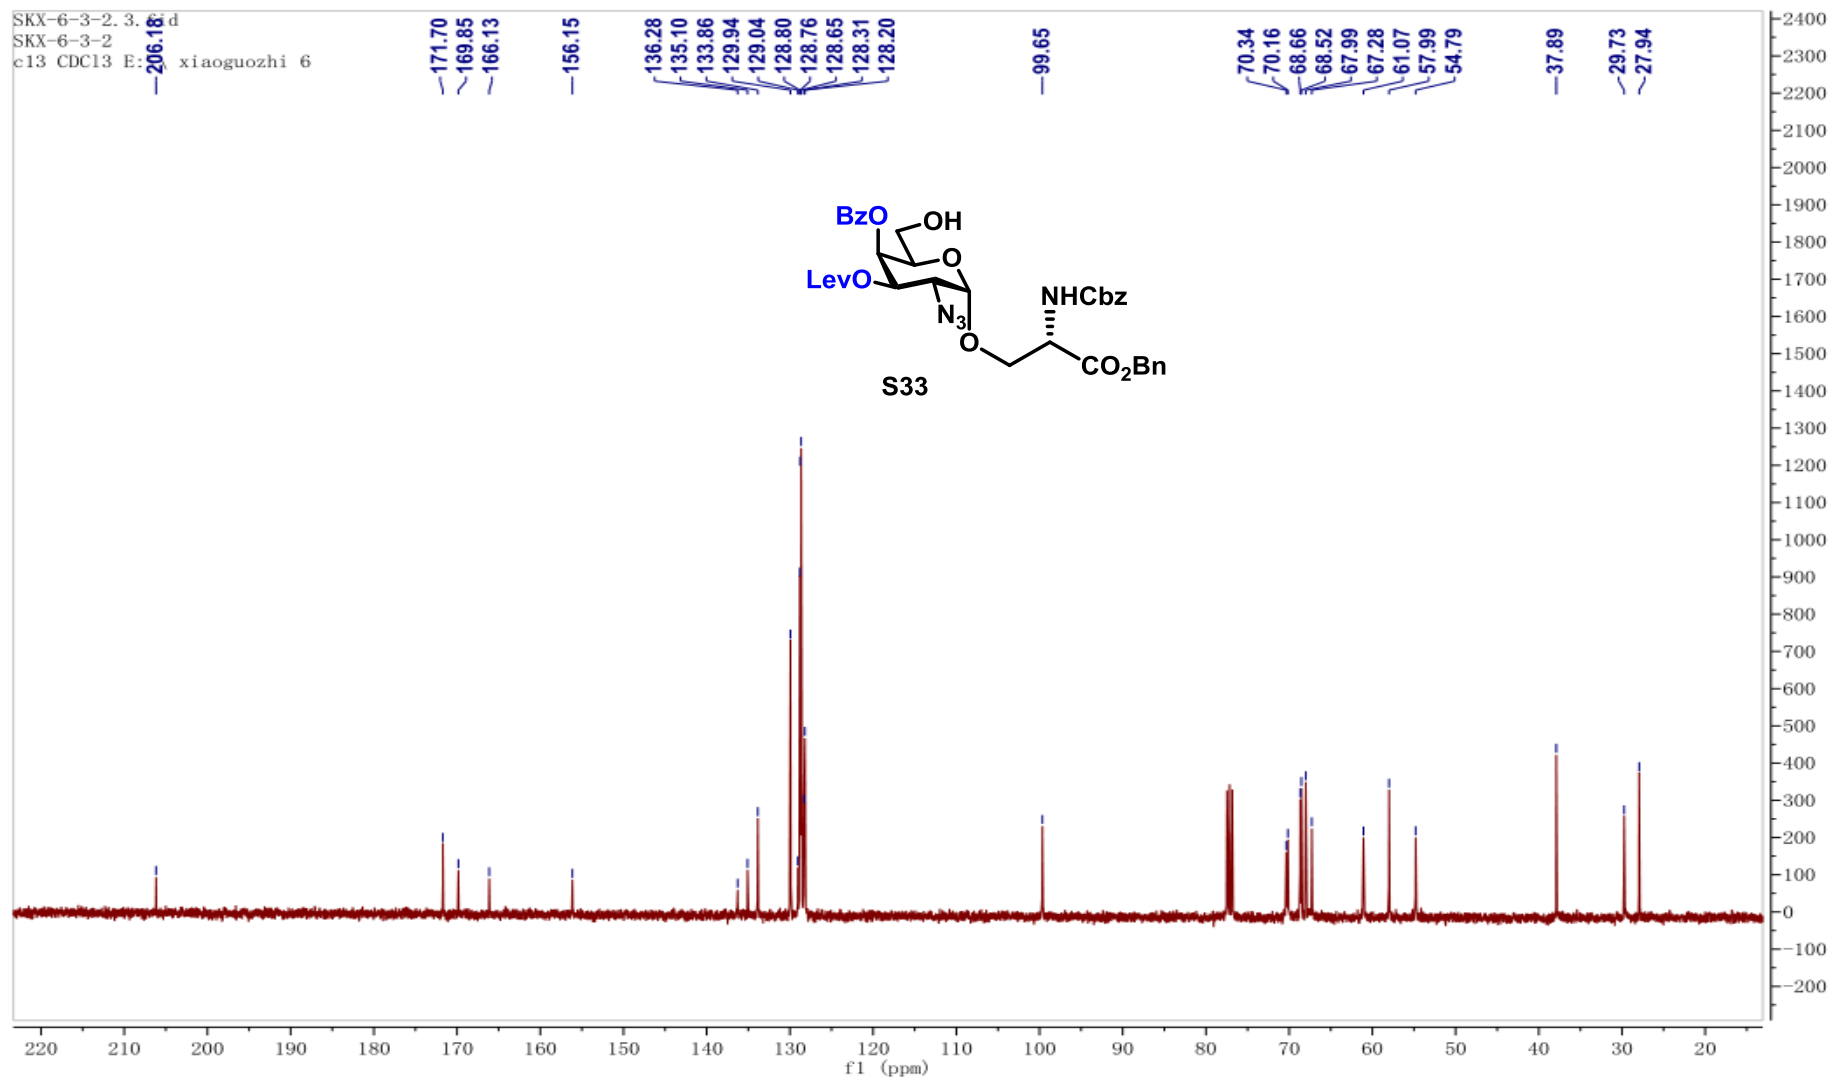

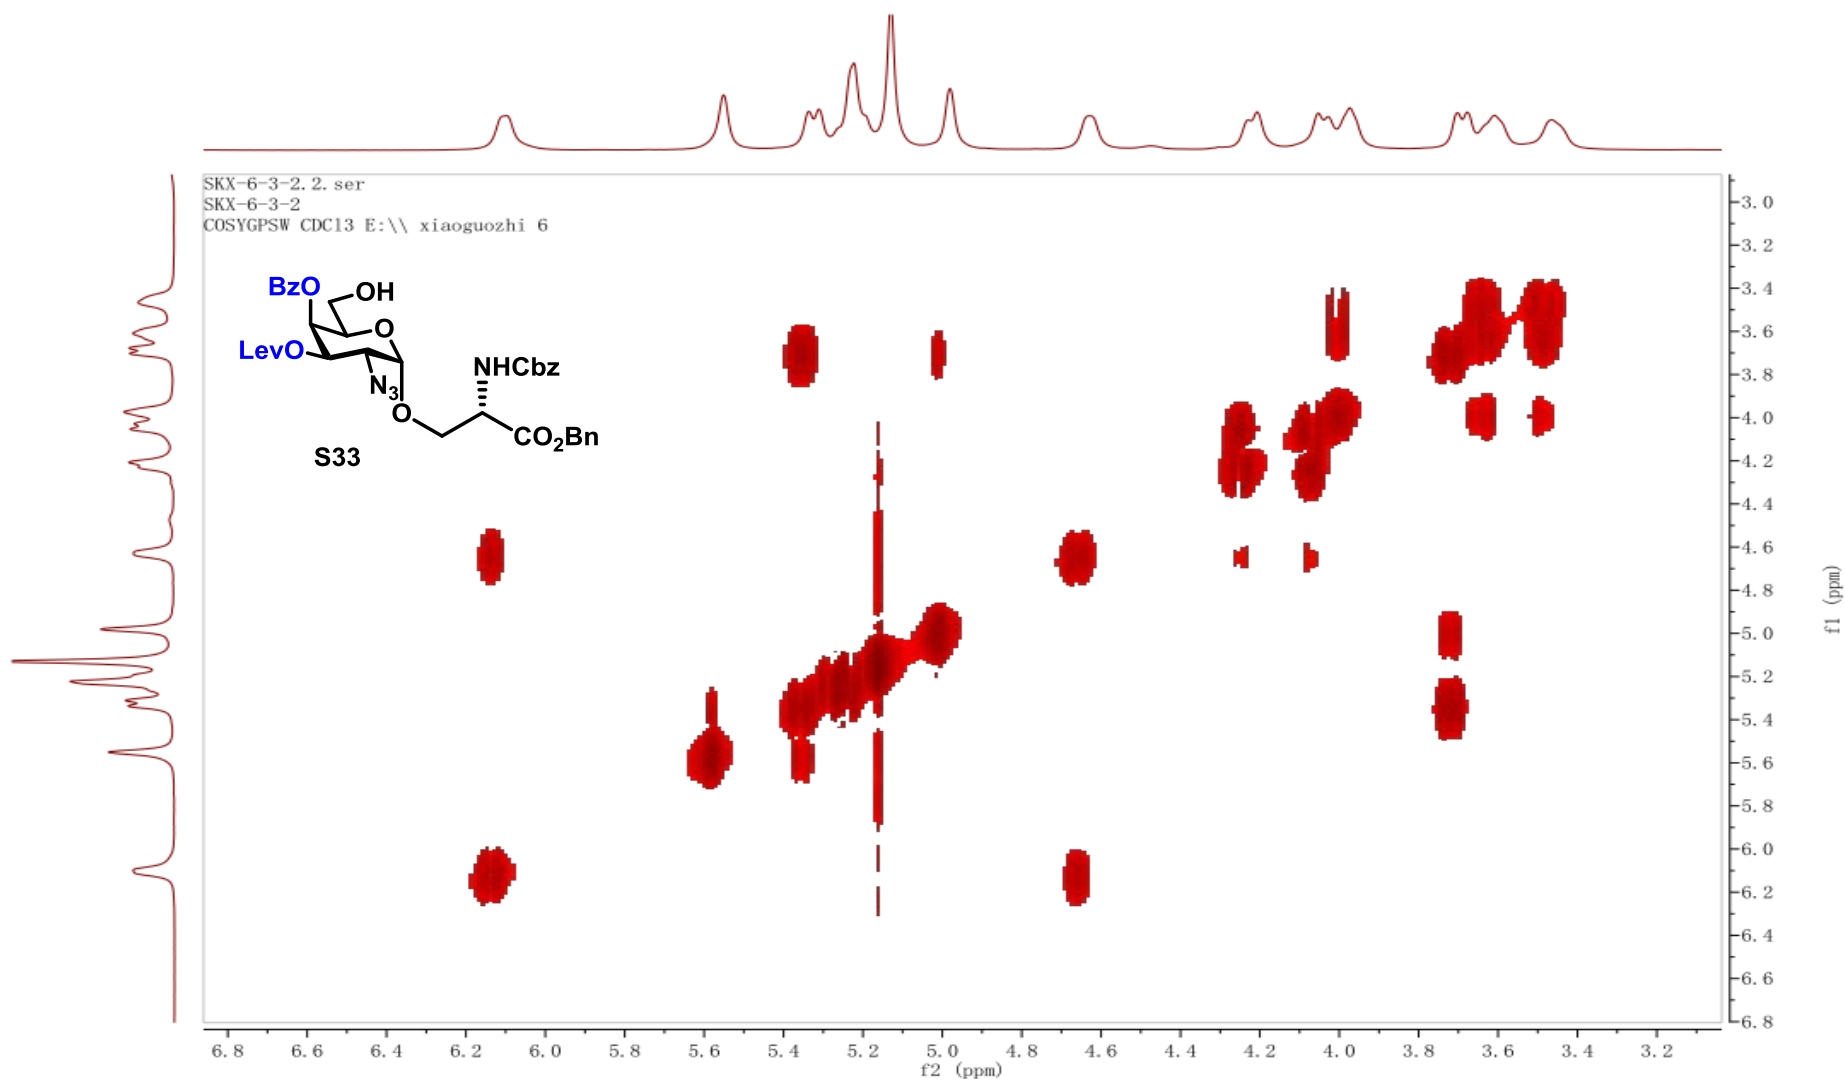

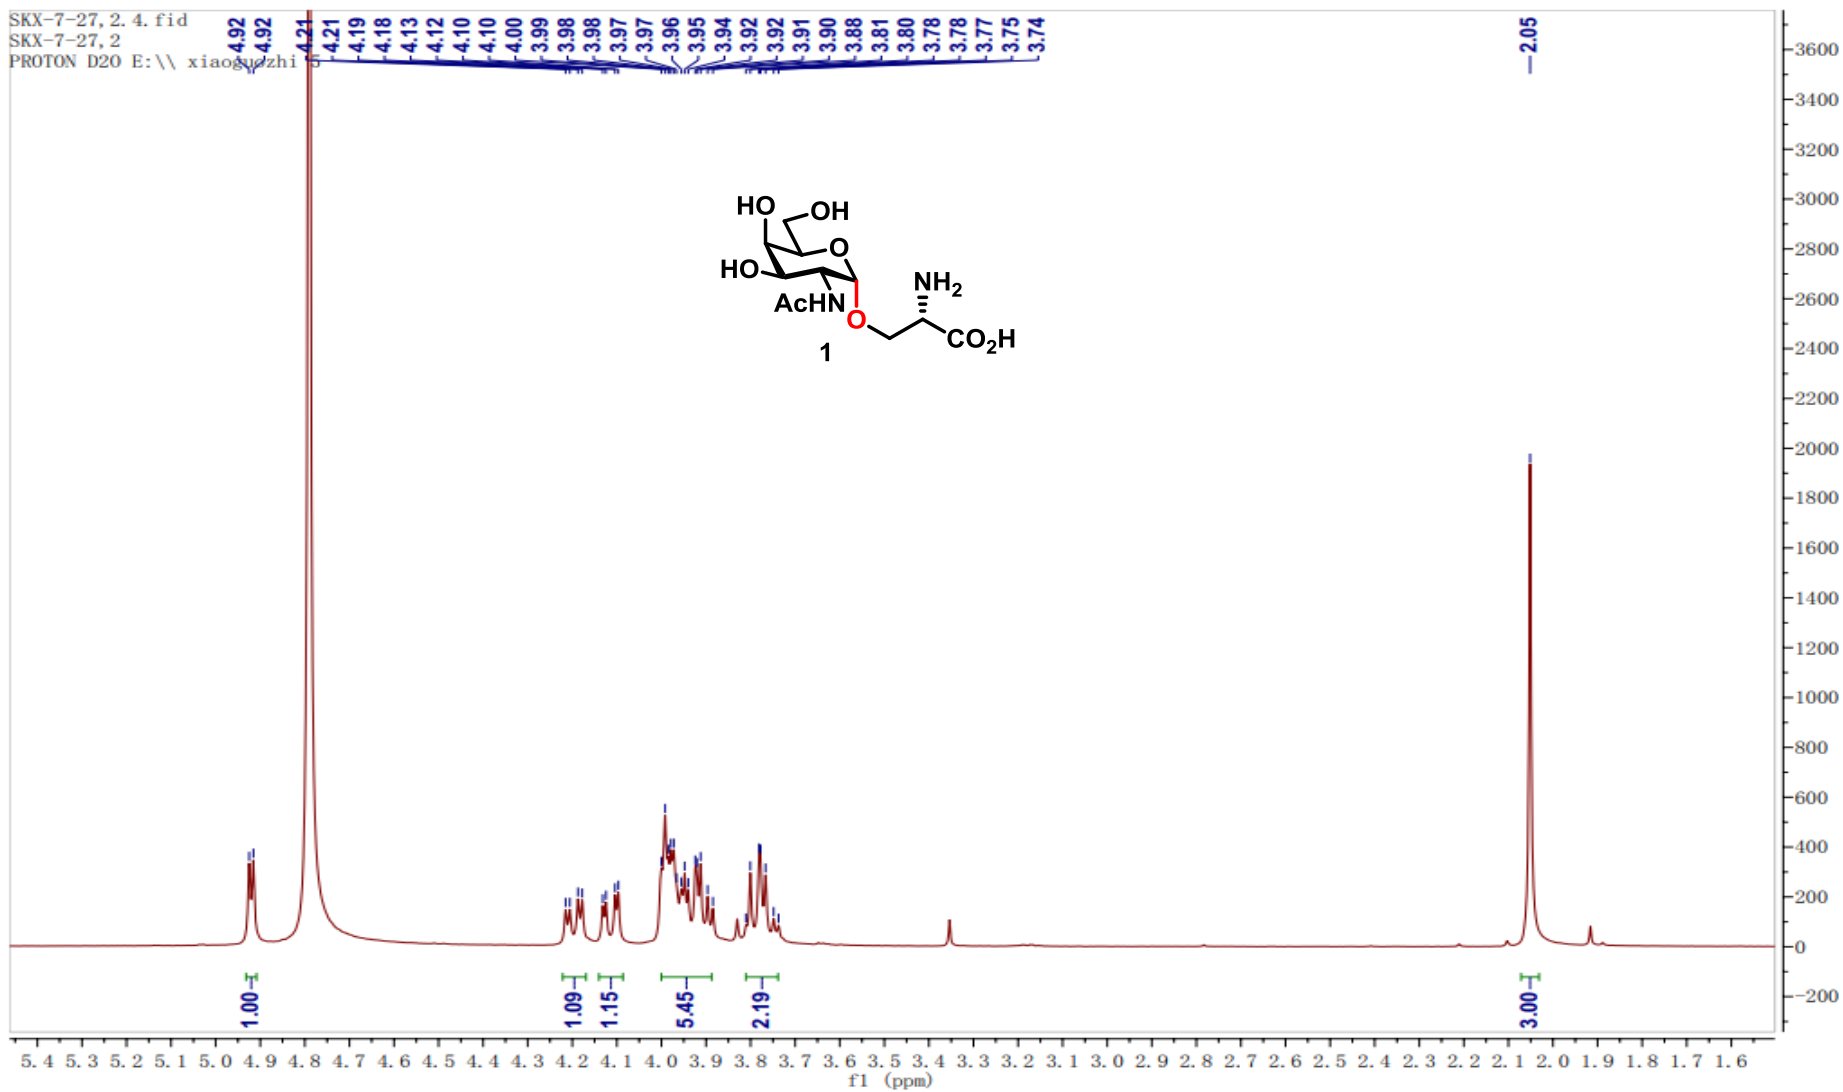

reSKX-7-27. 3.  
skx-7-27  
c13 D20 E:\\...guozhi 18

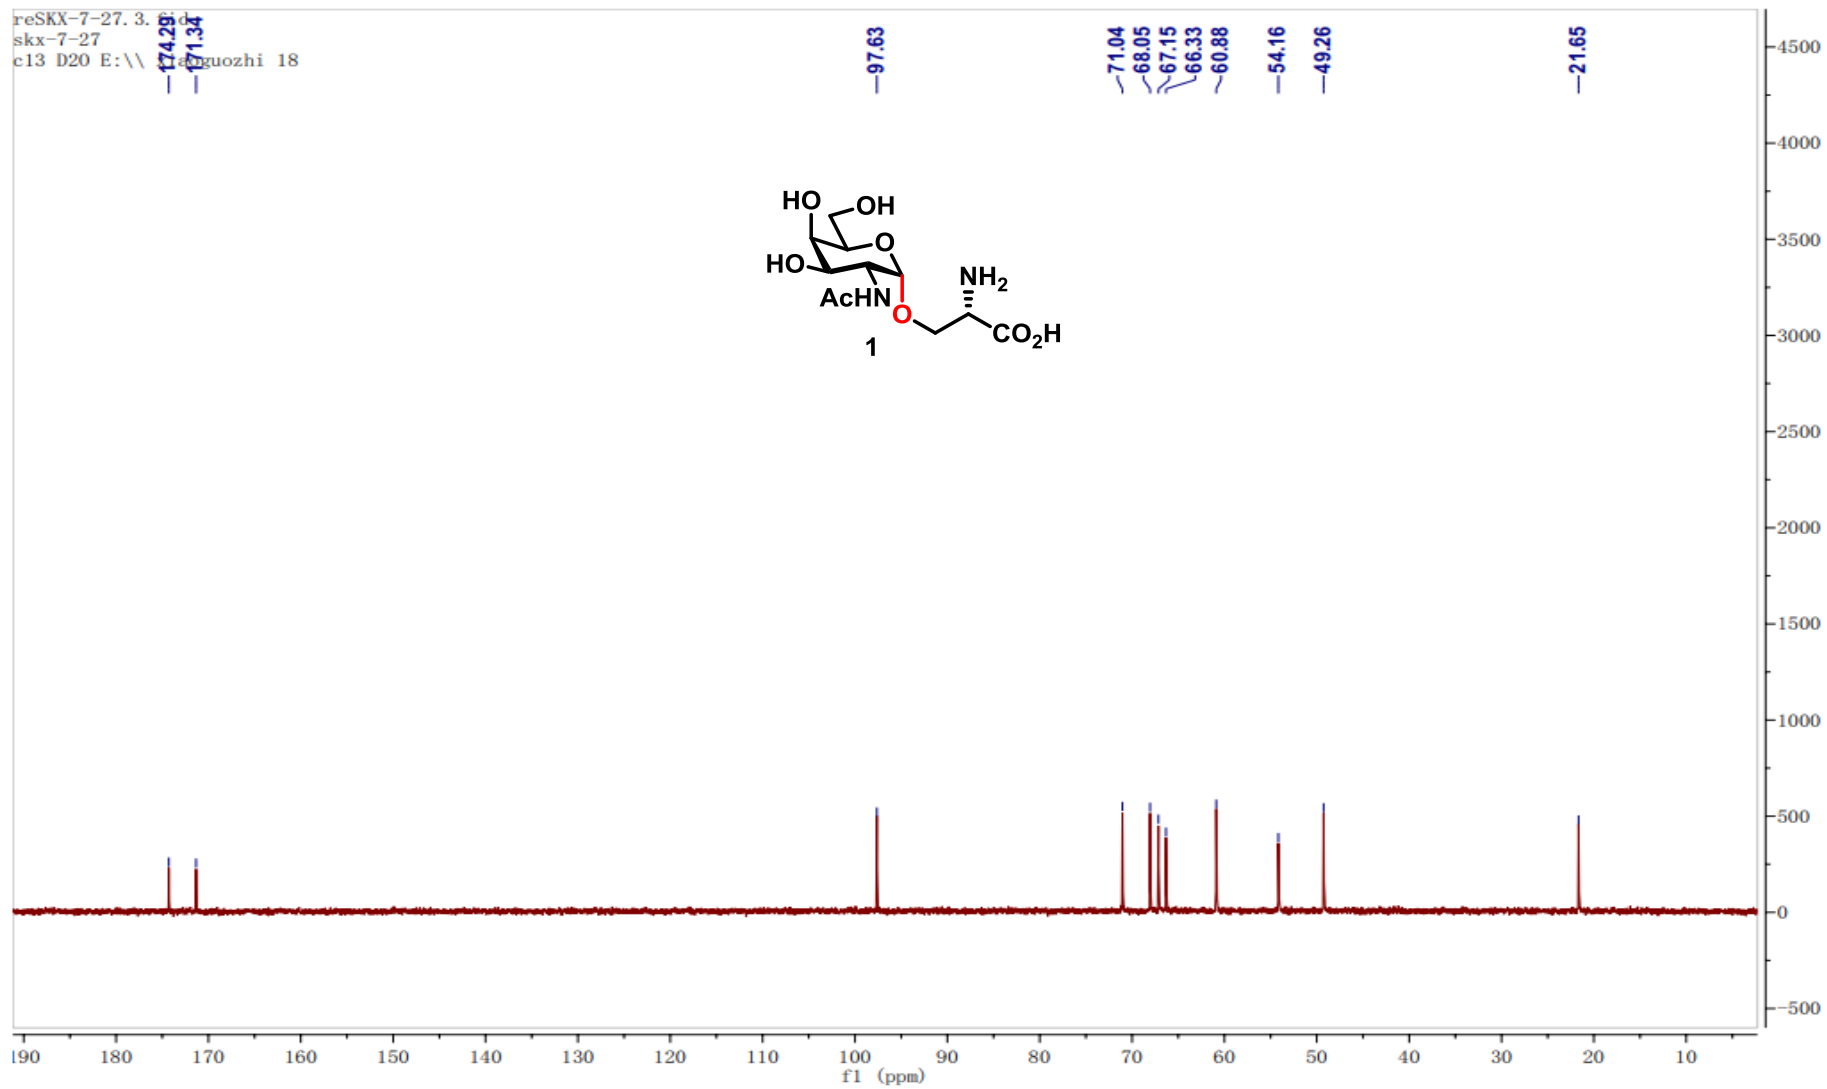



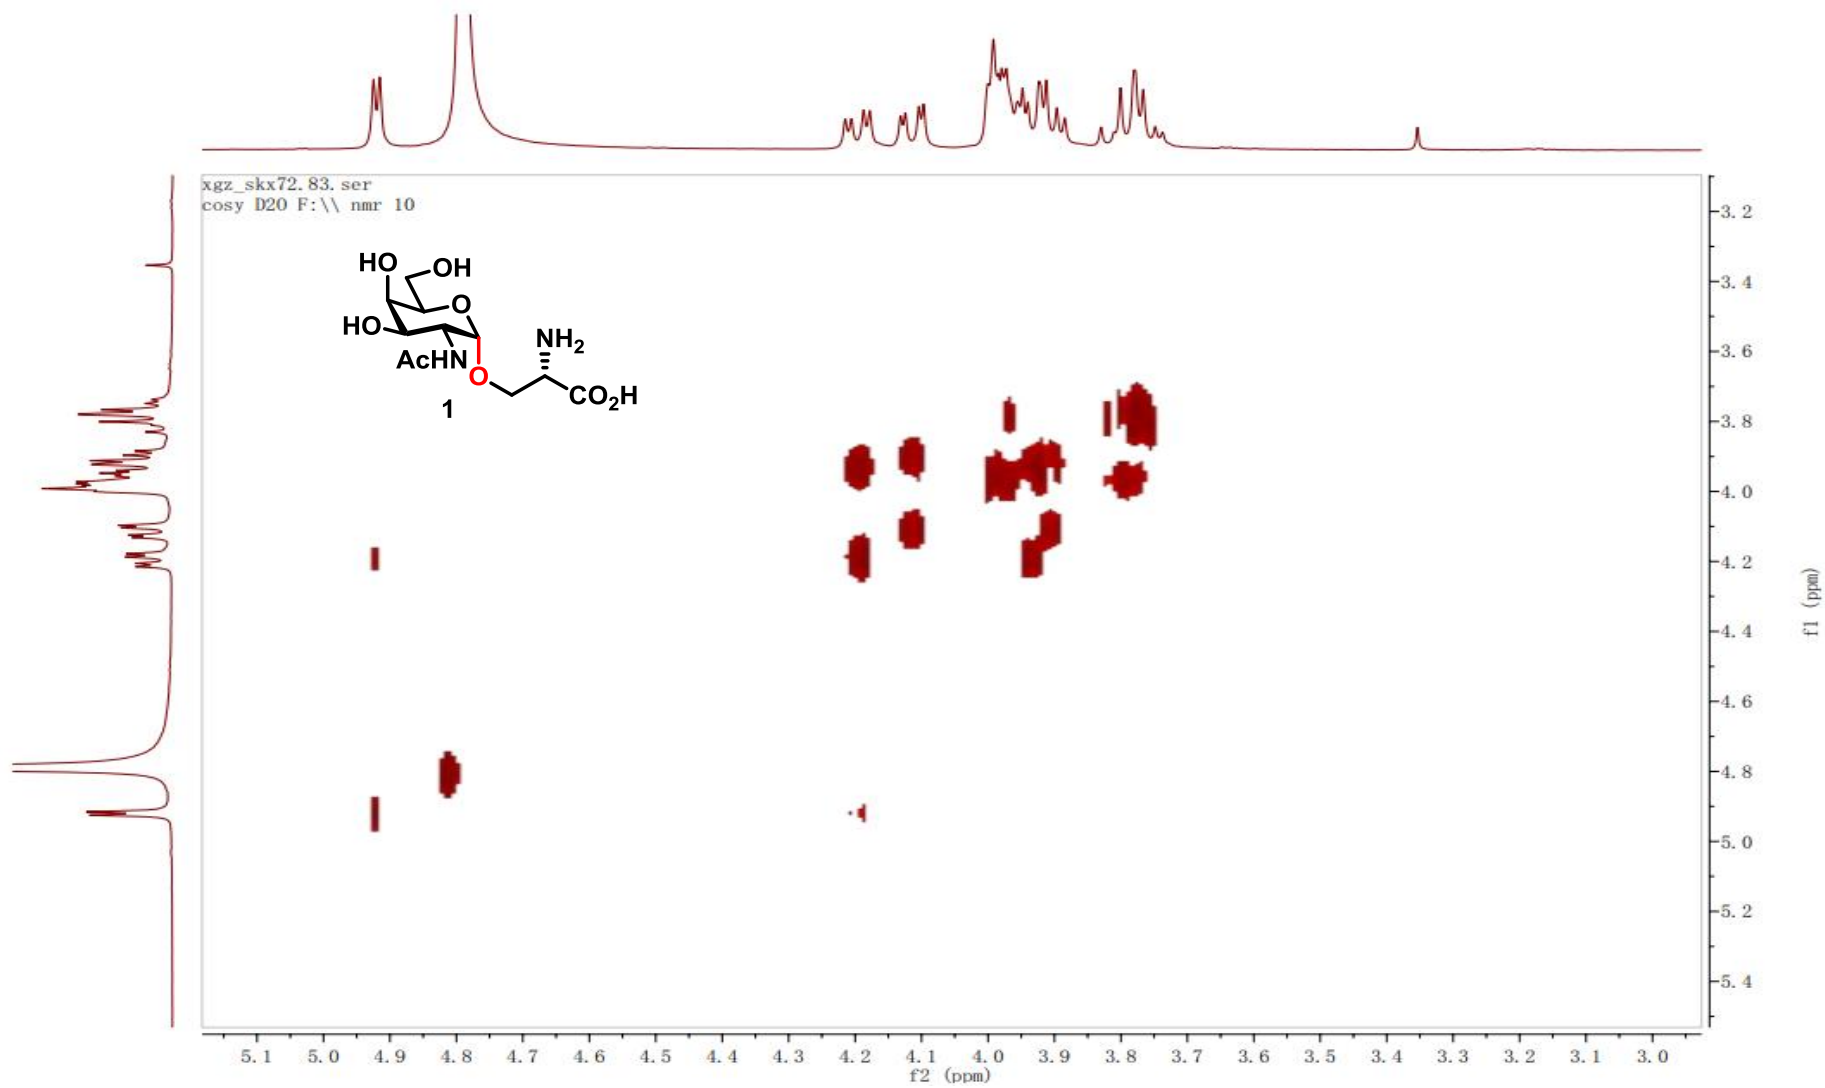

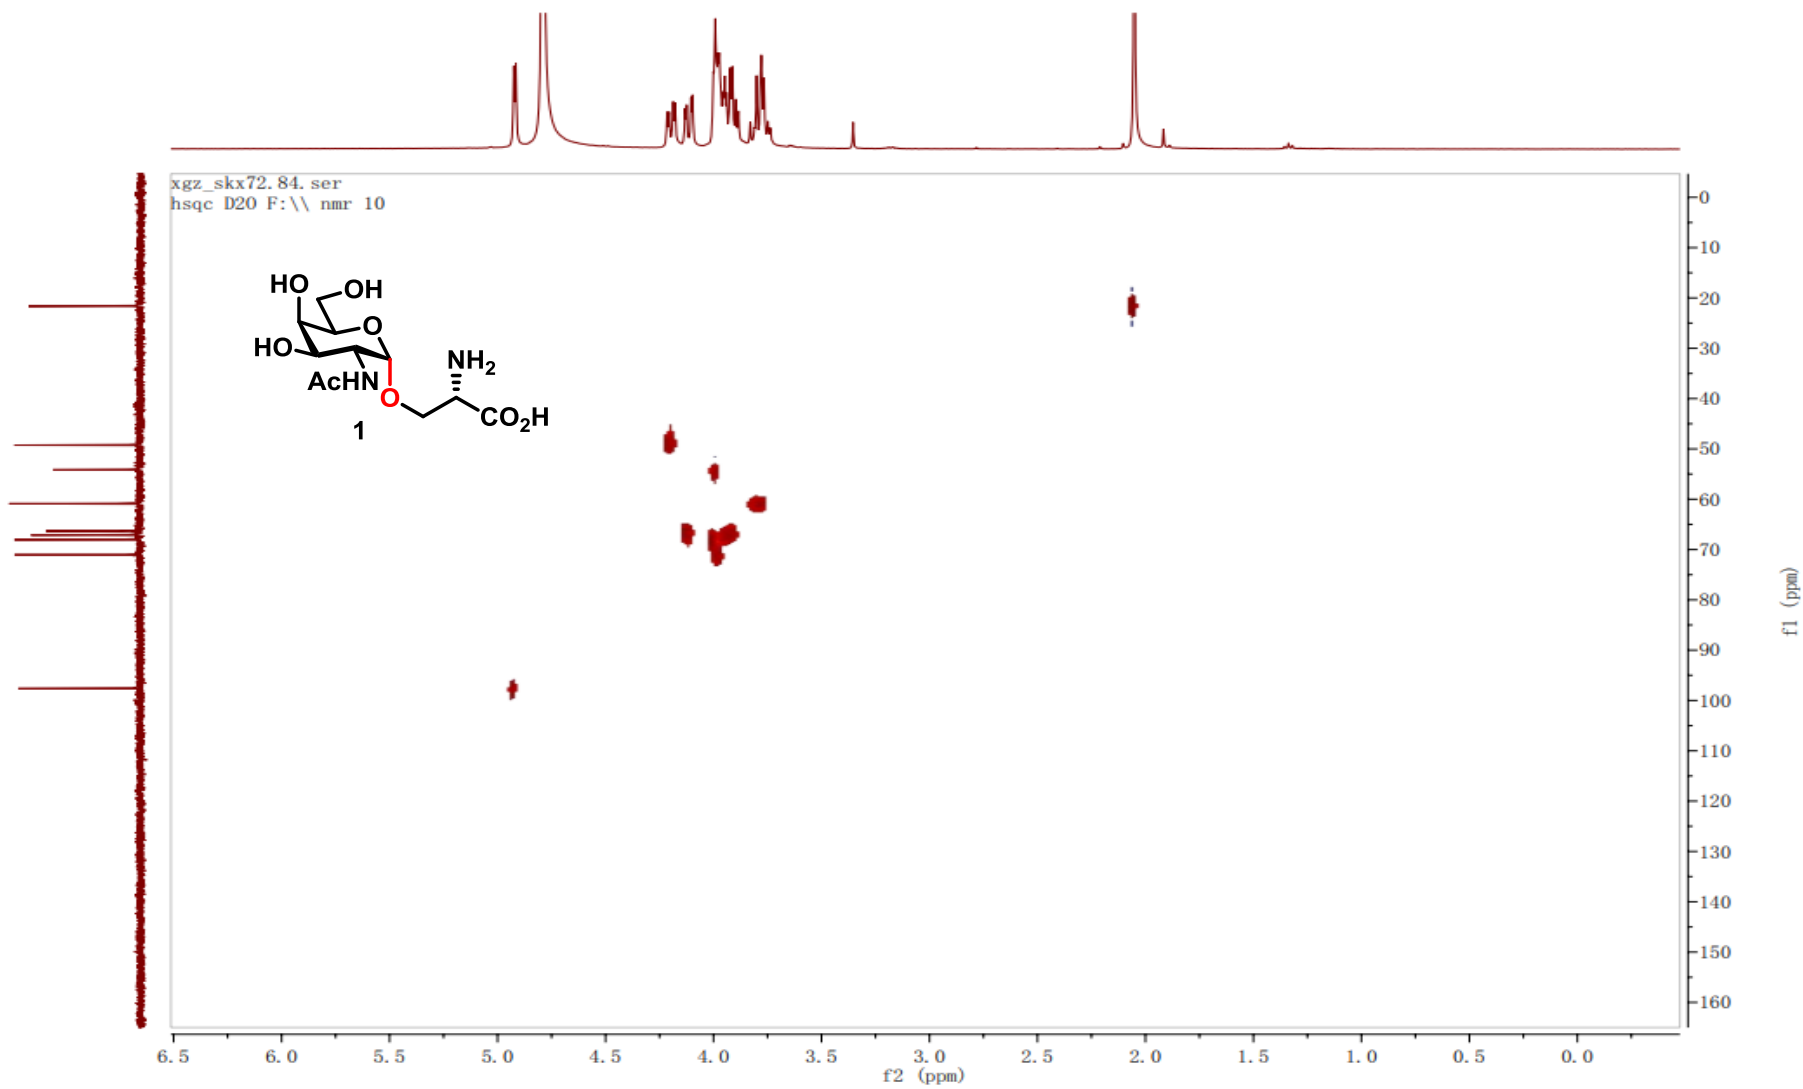

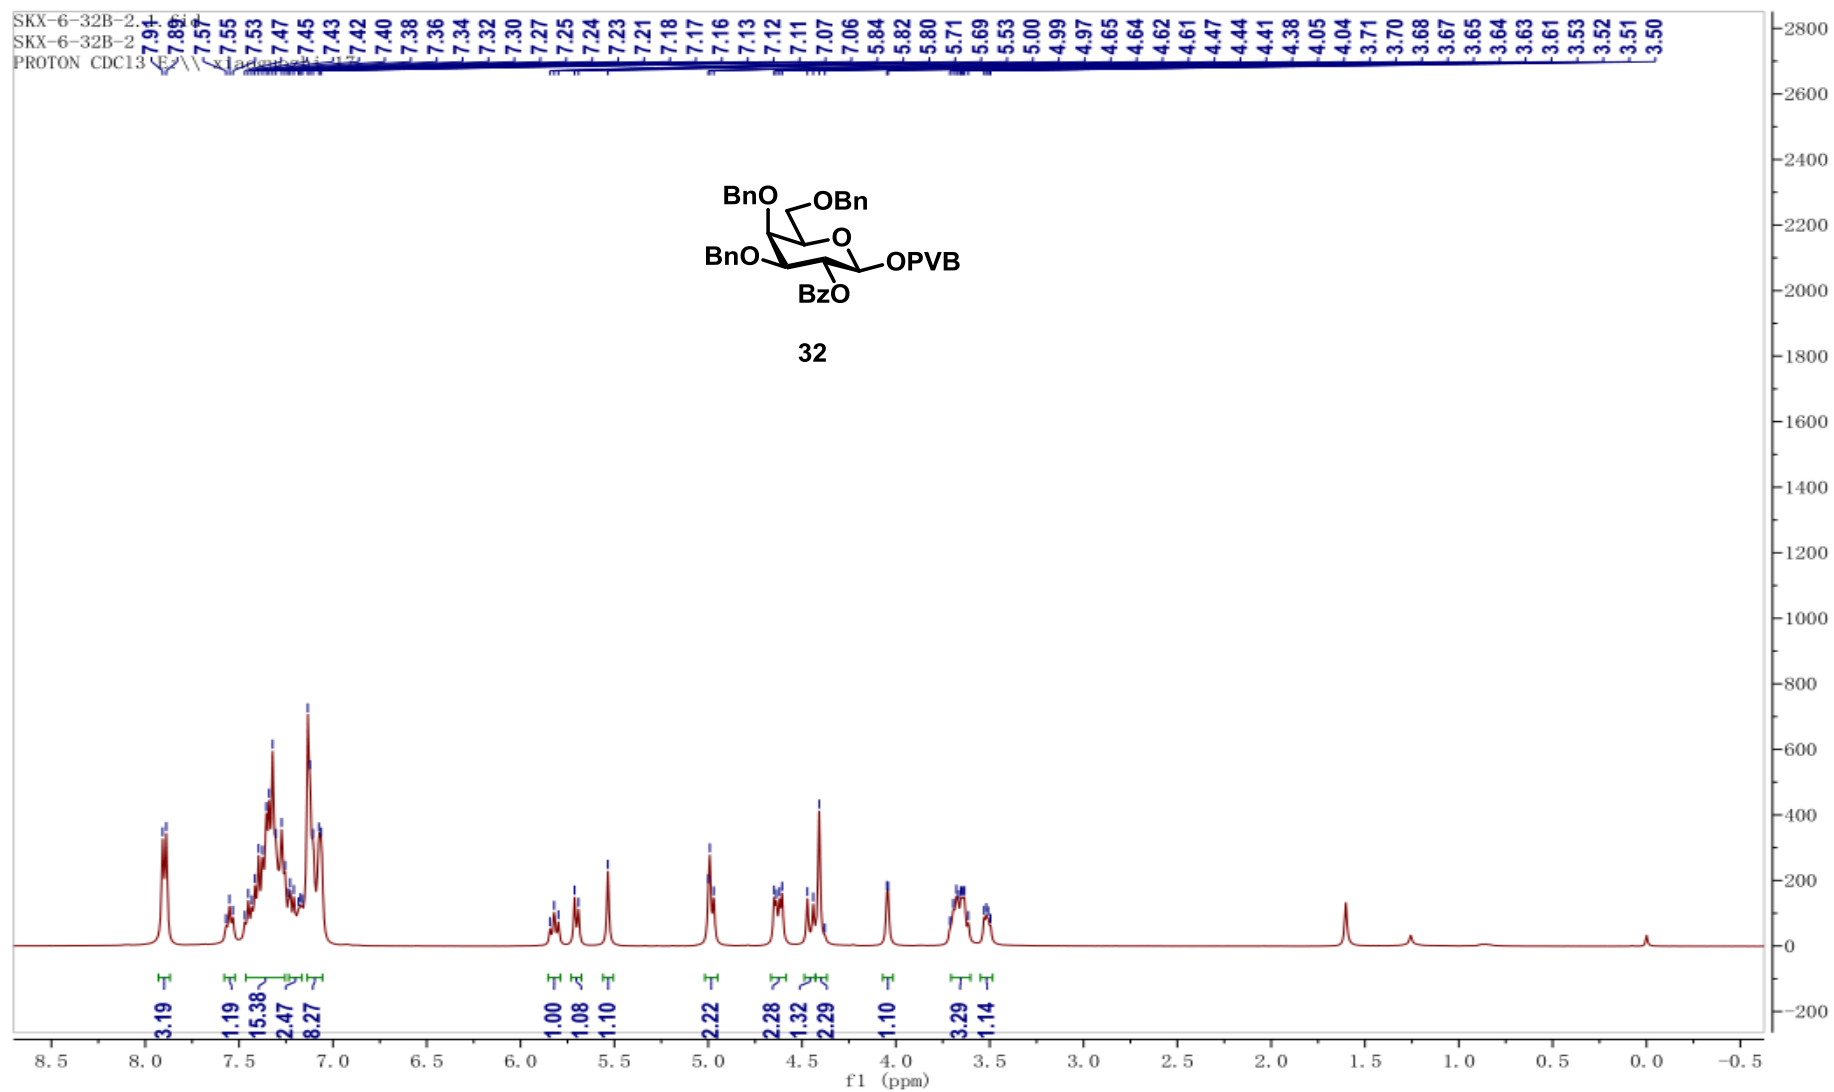

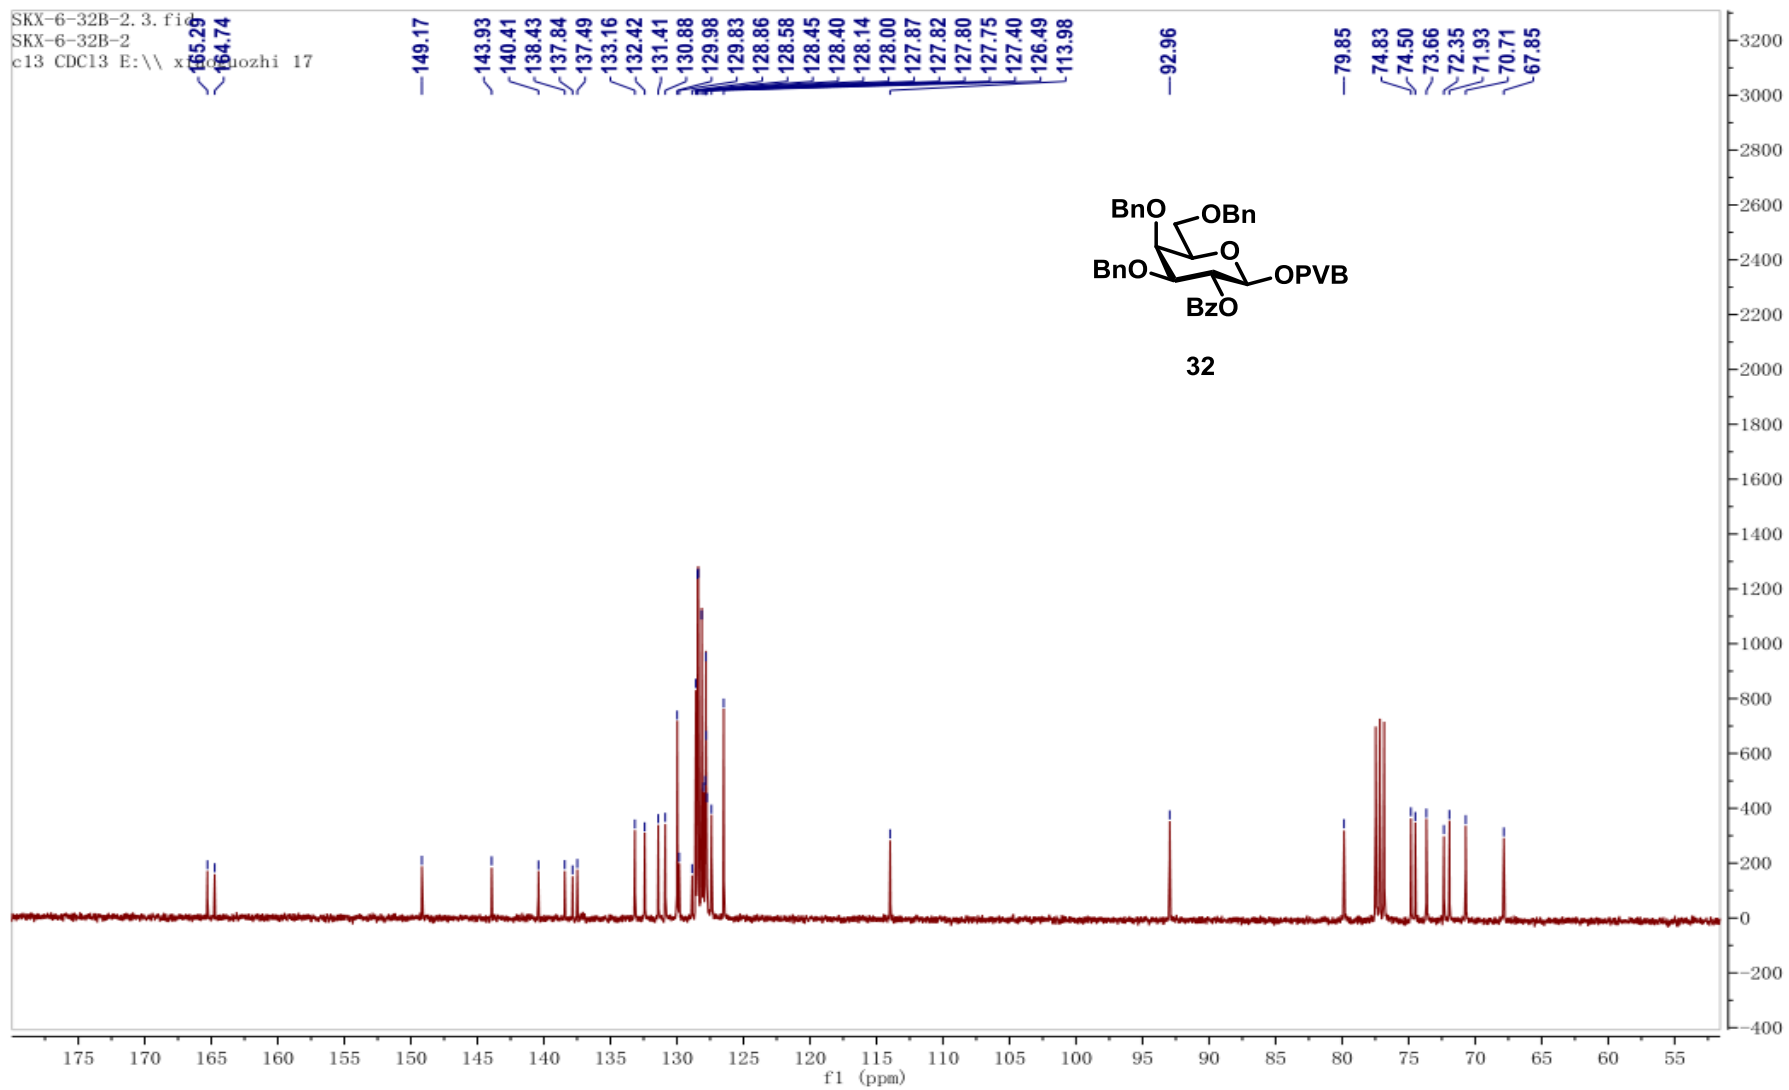

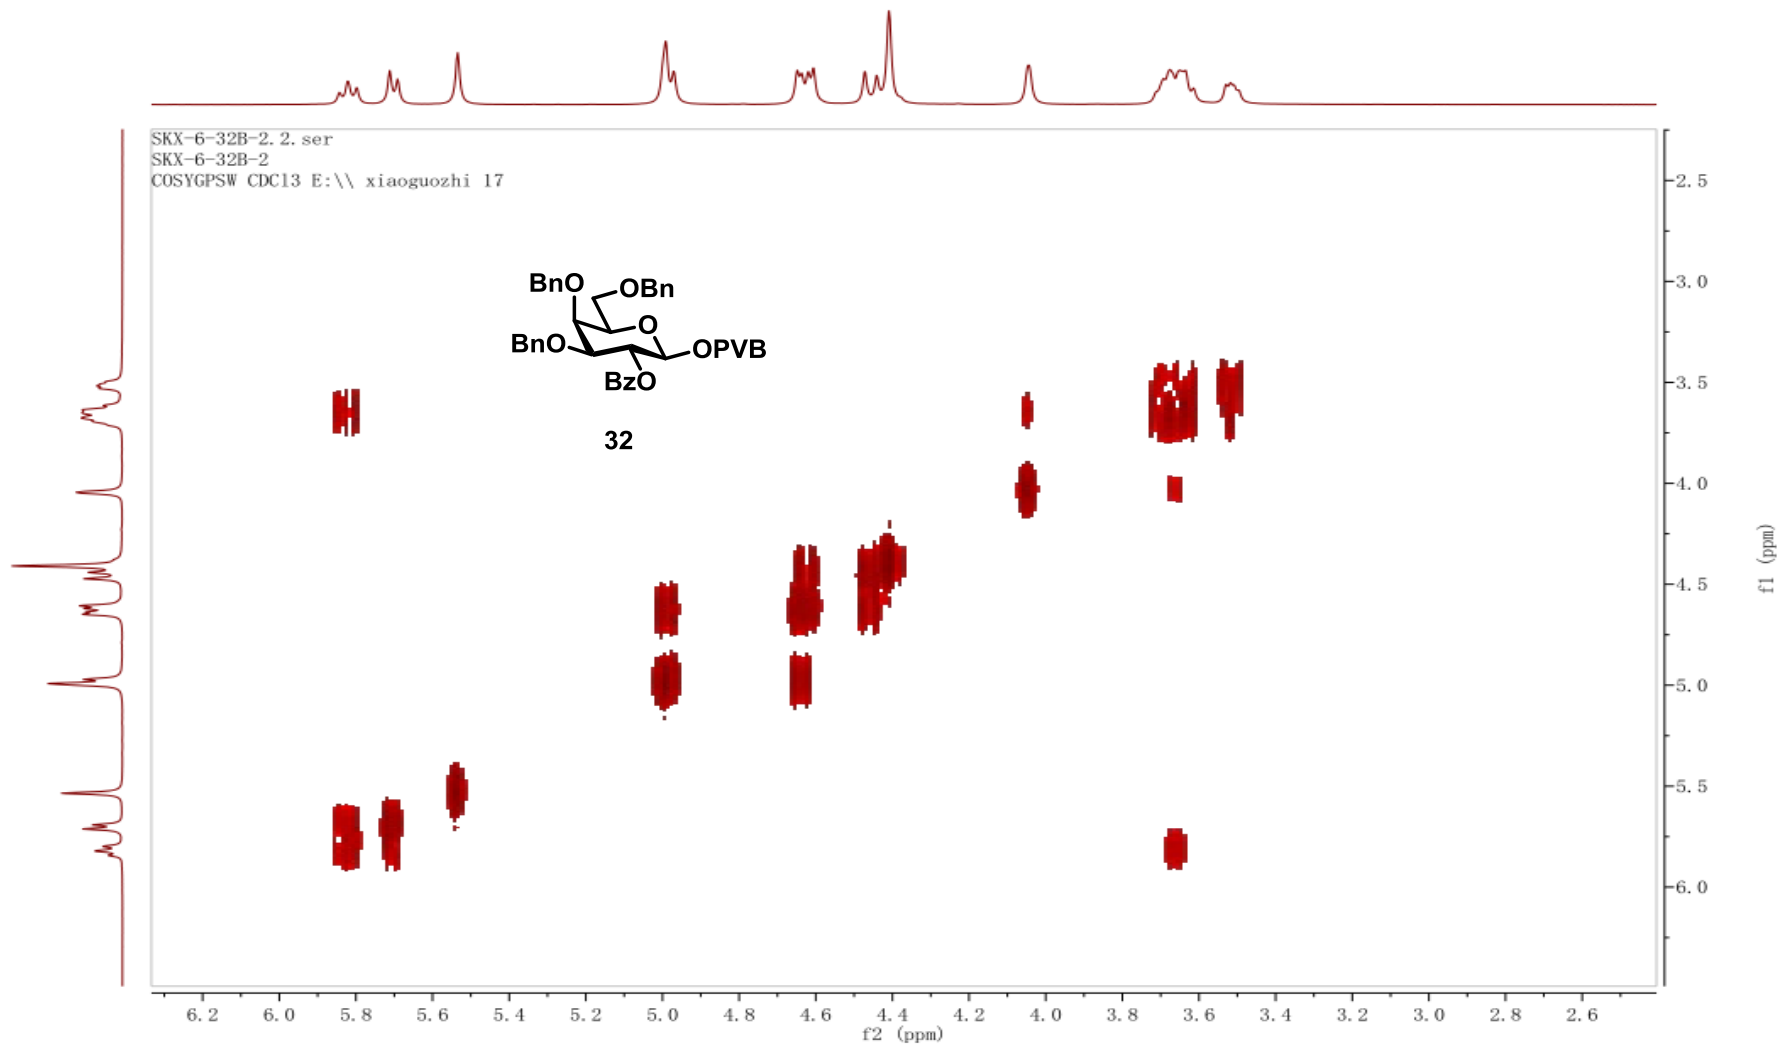

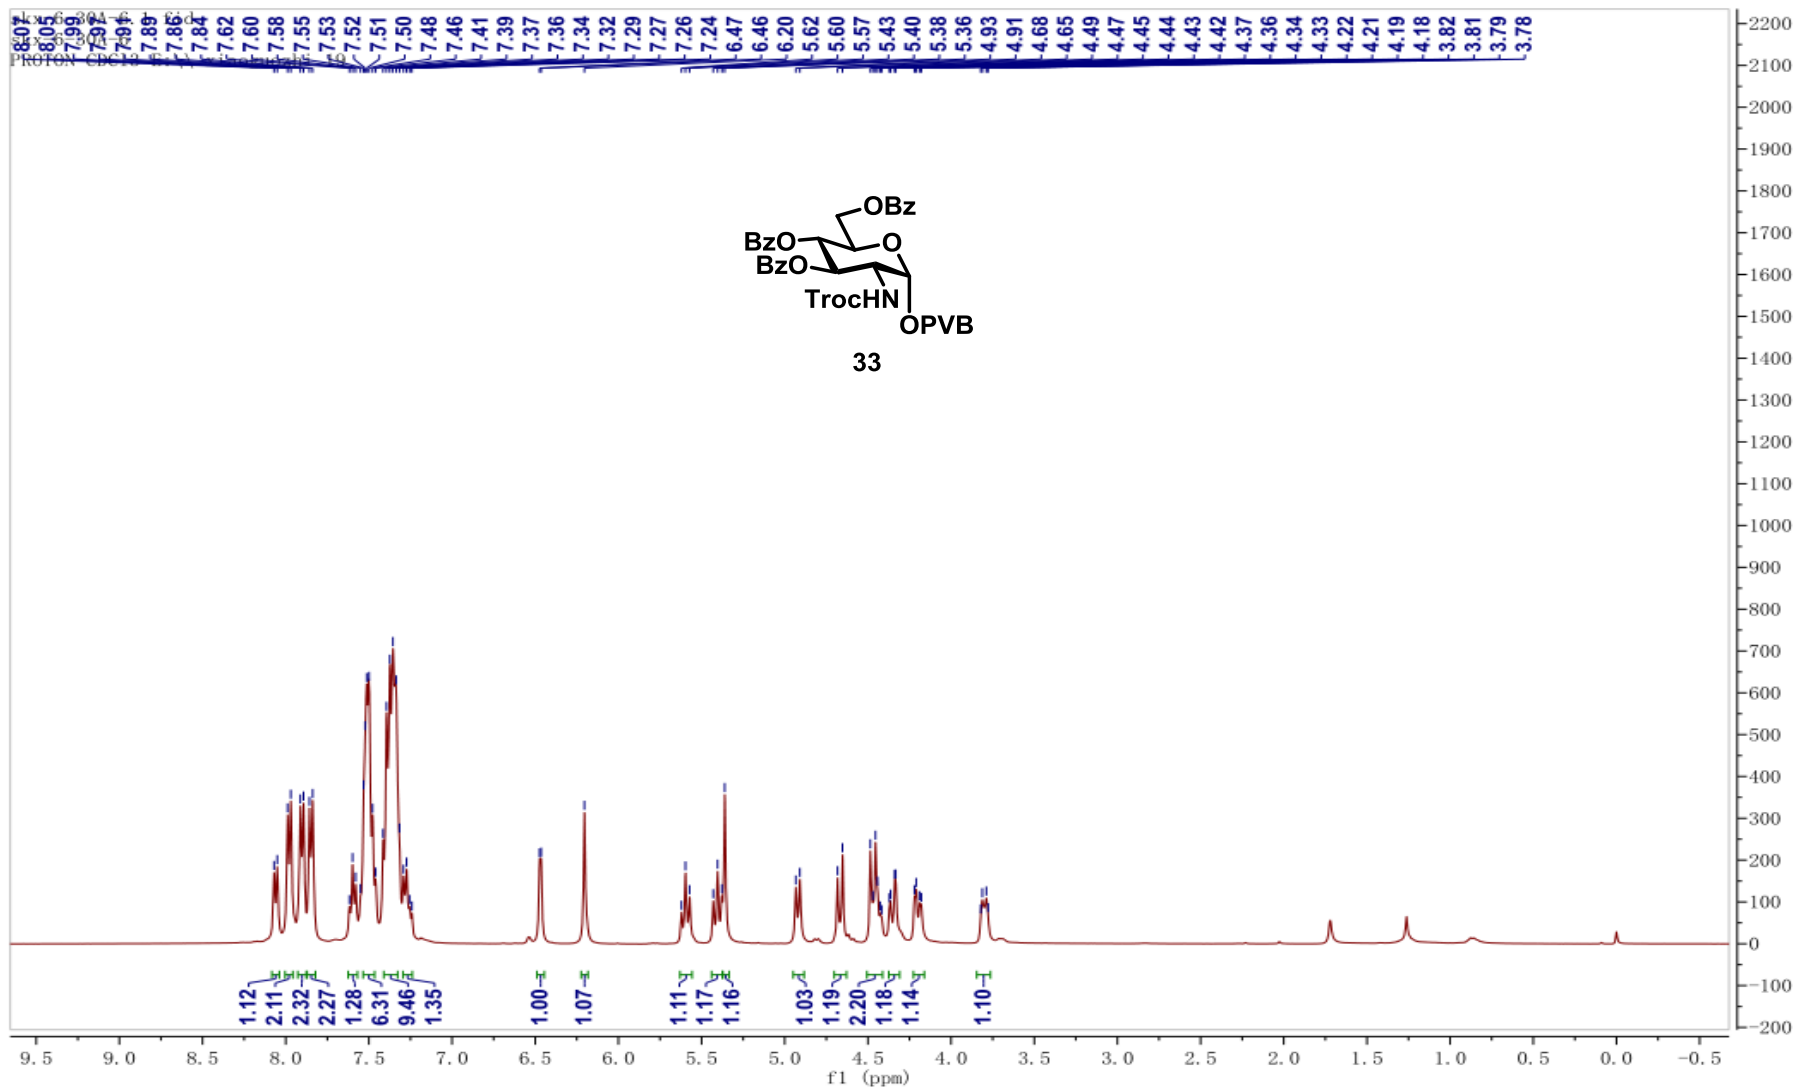

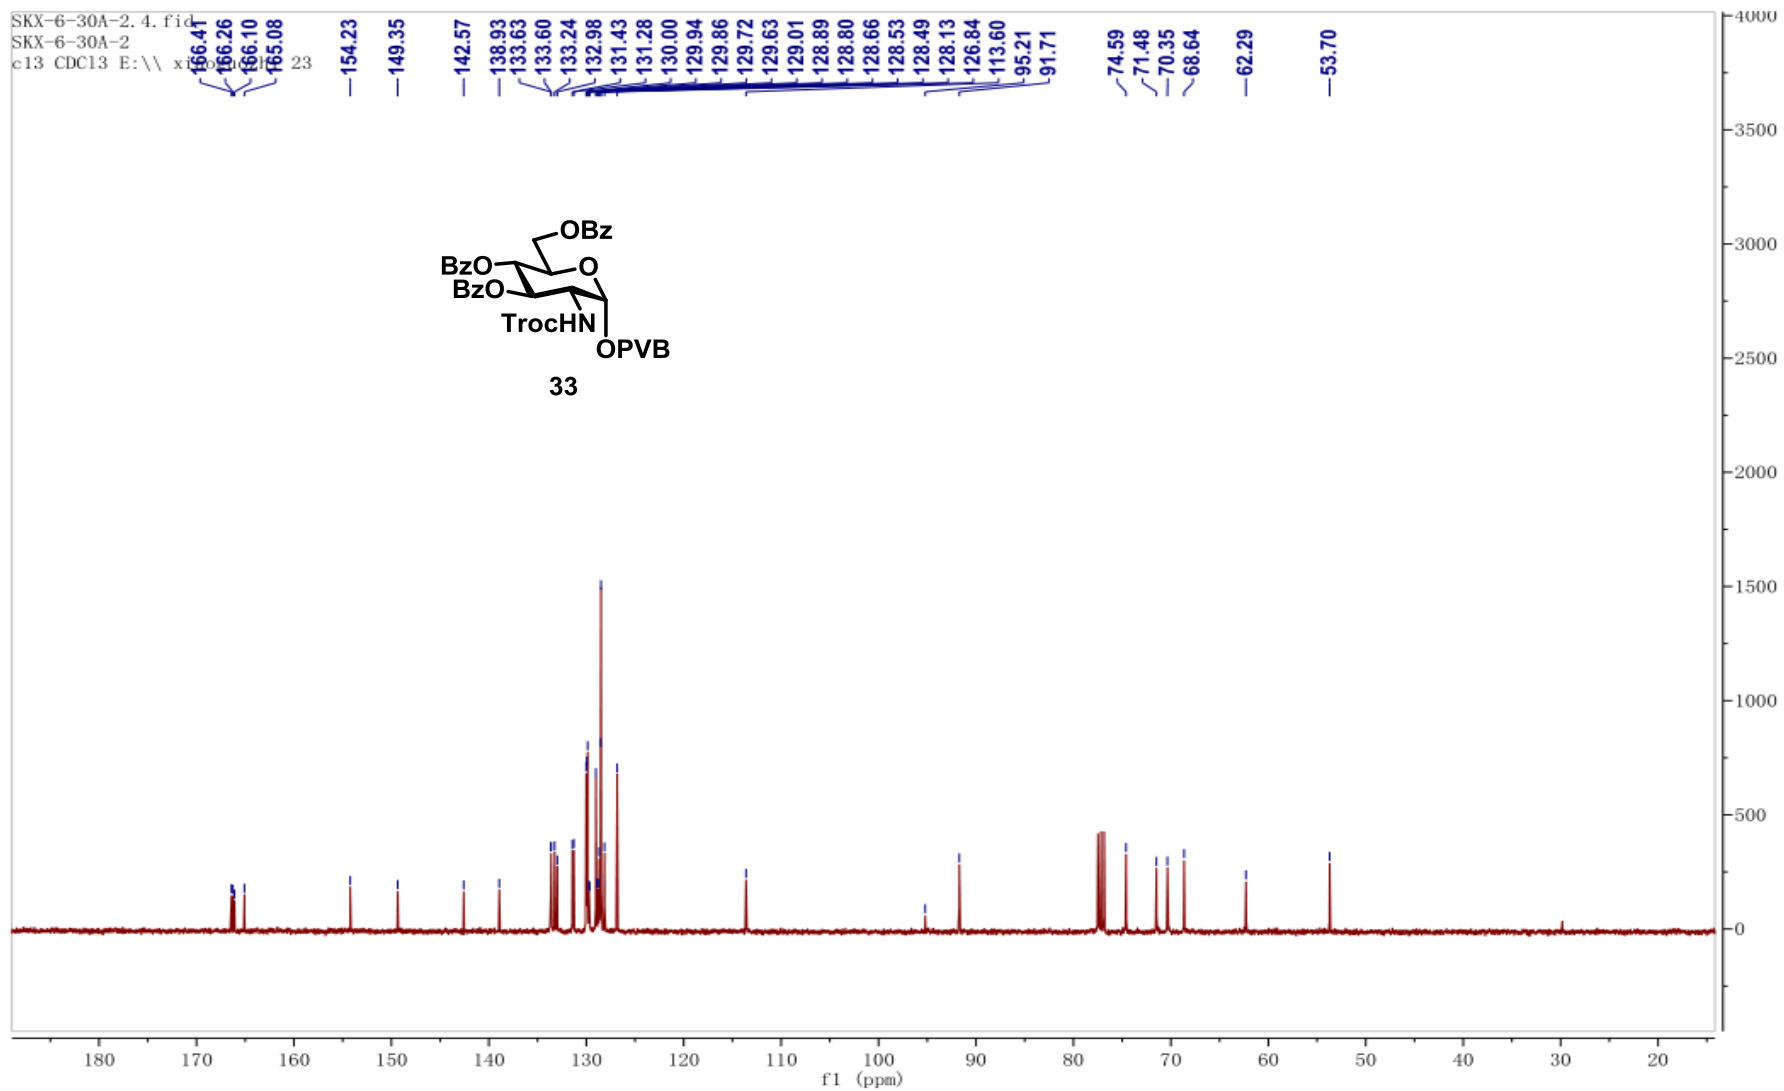

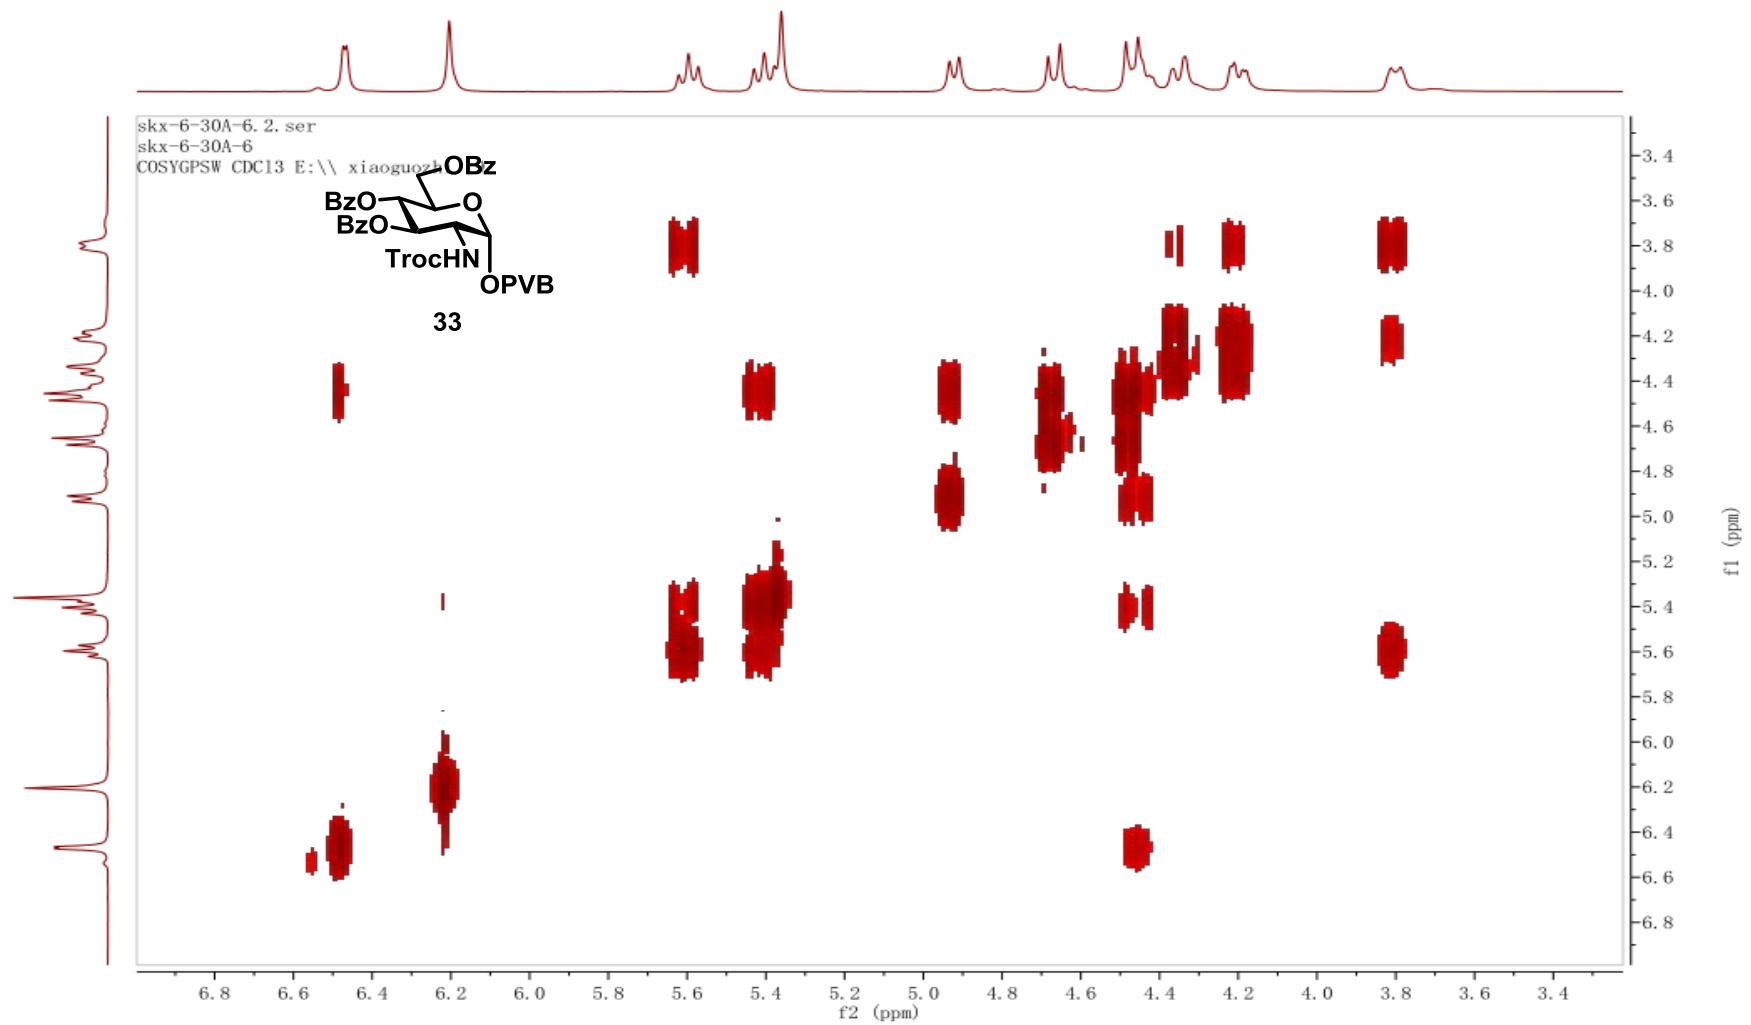



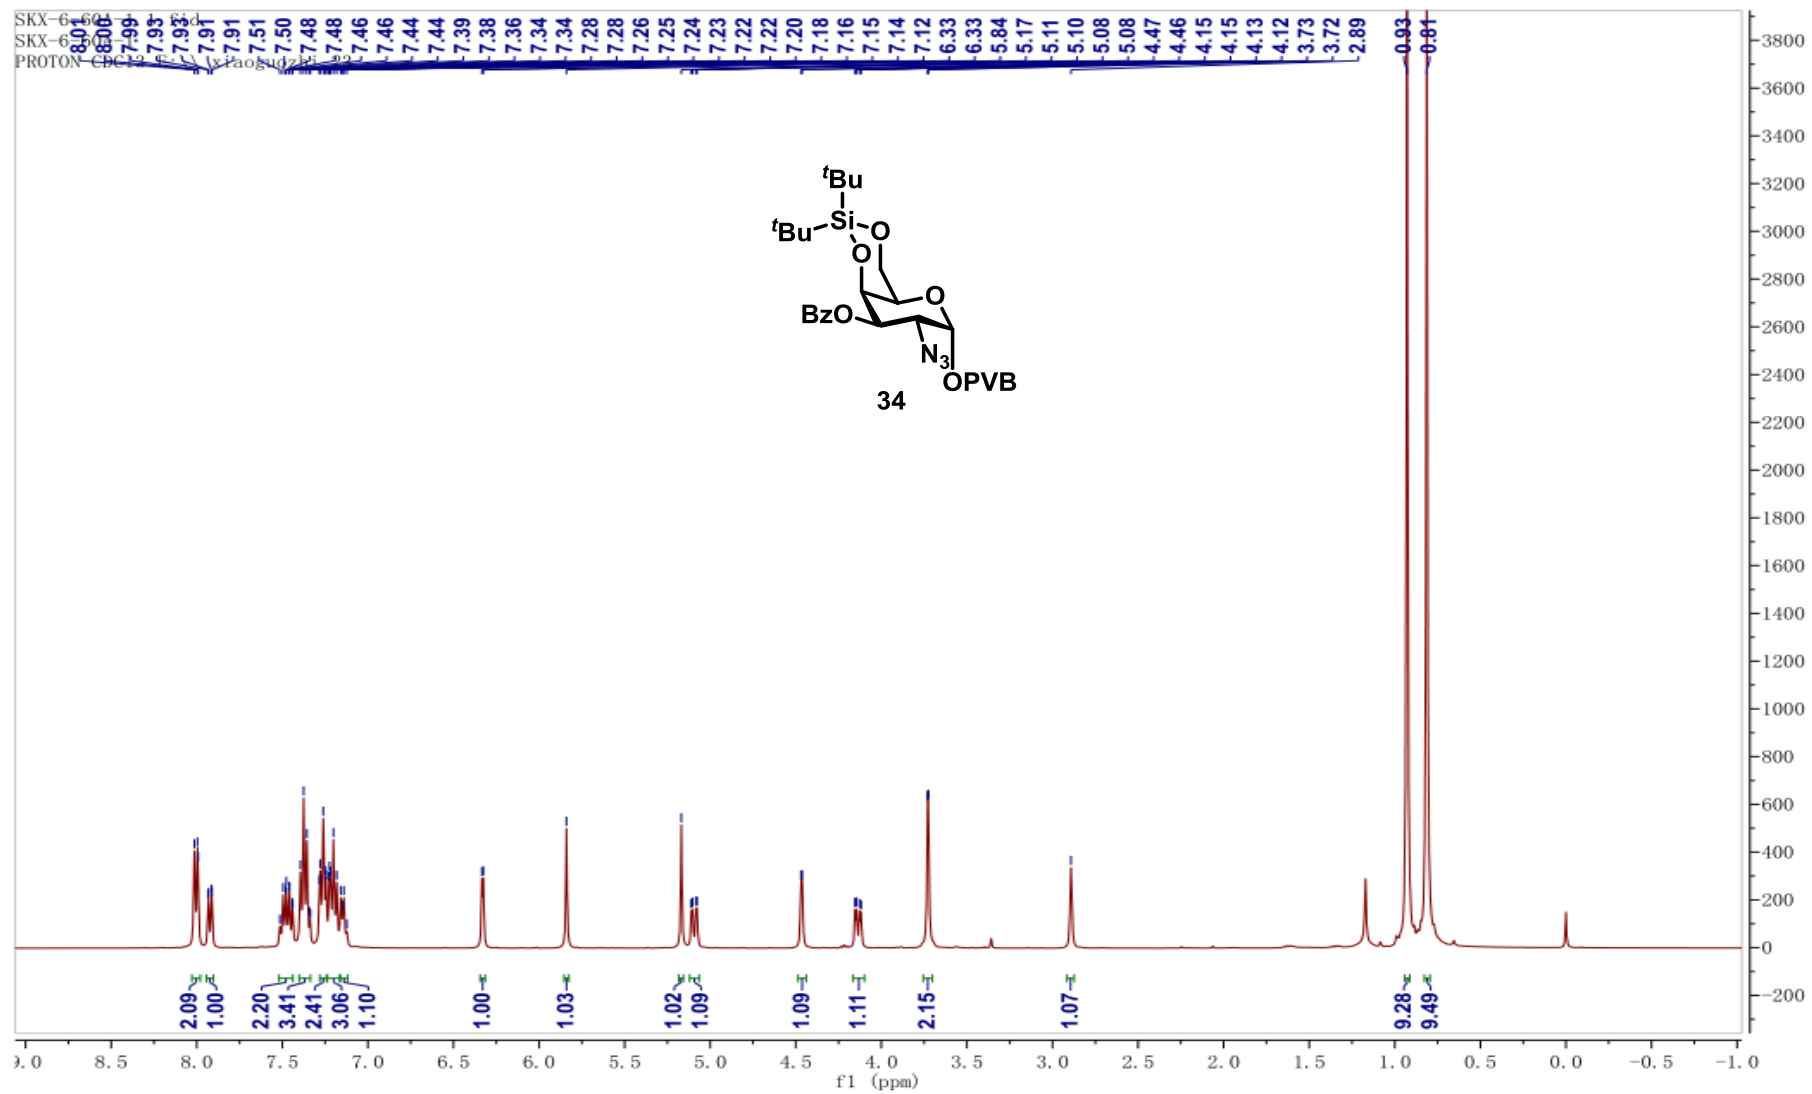

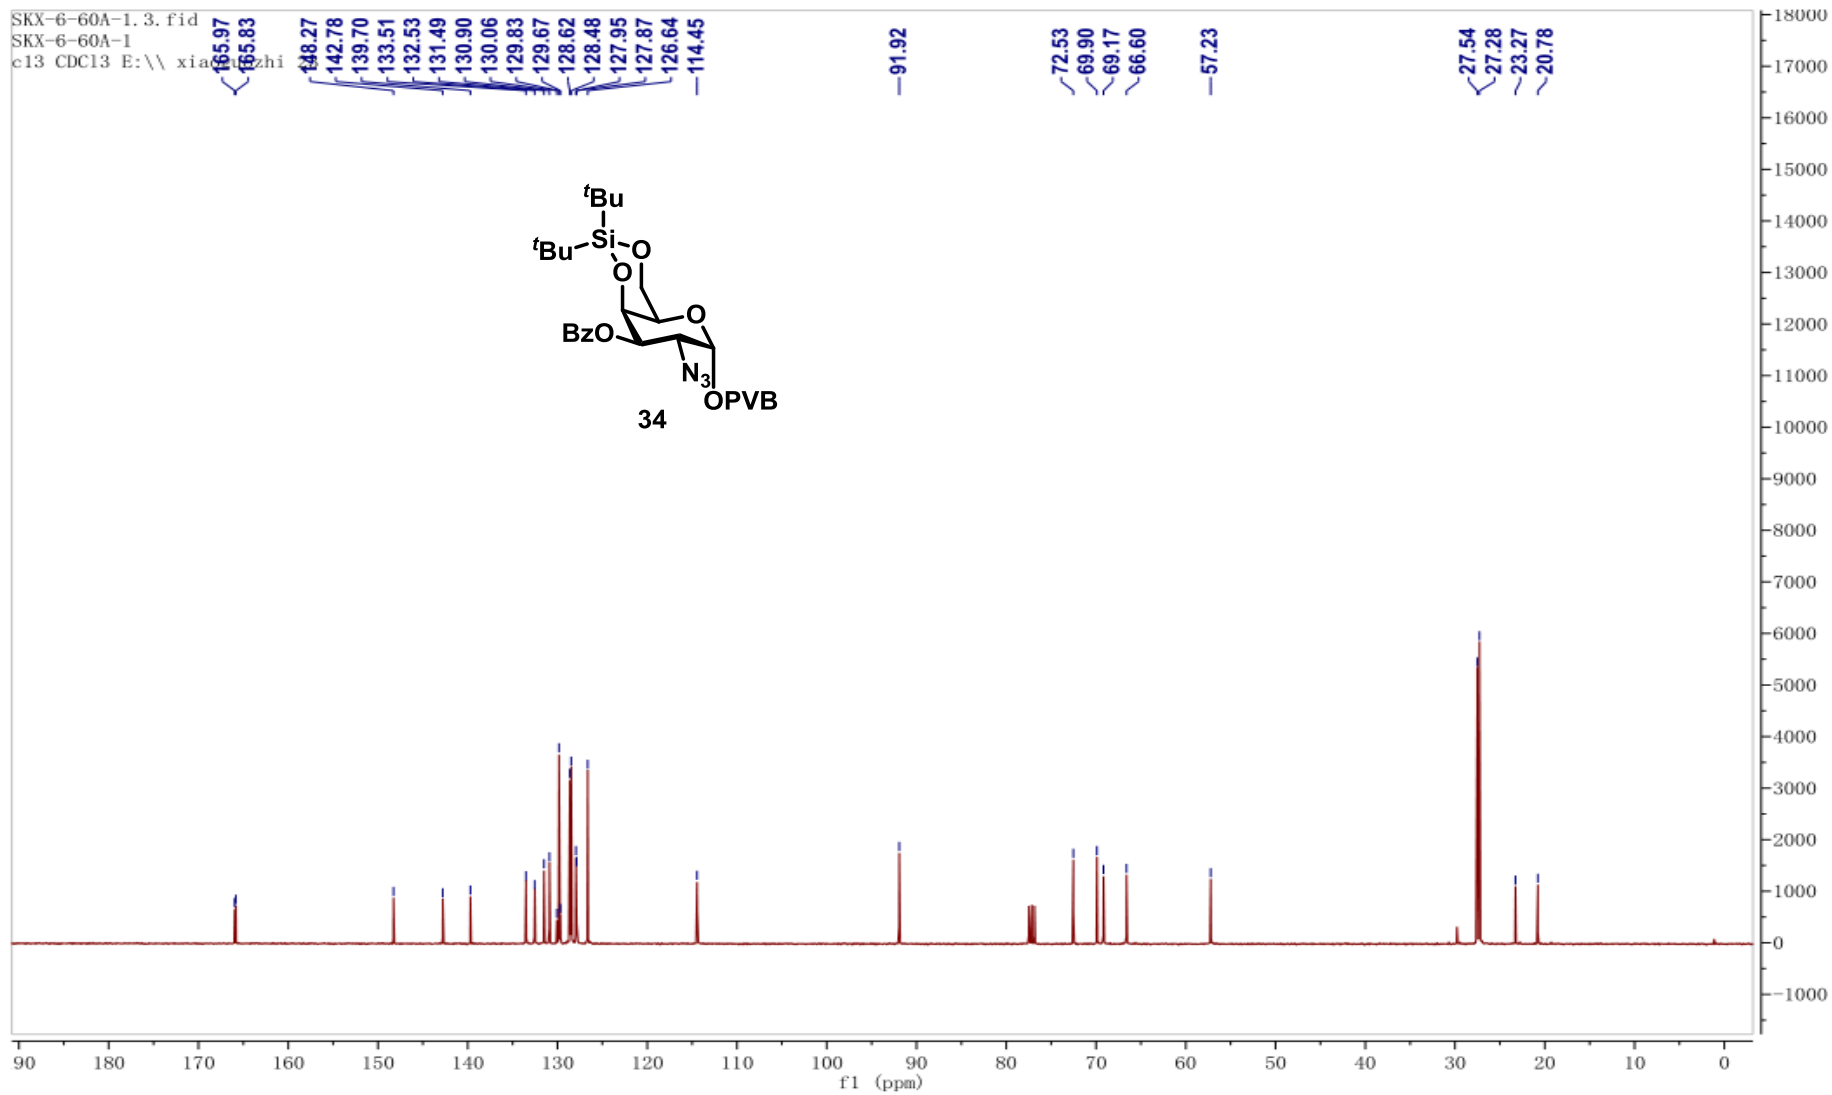

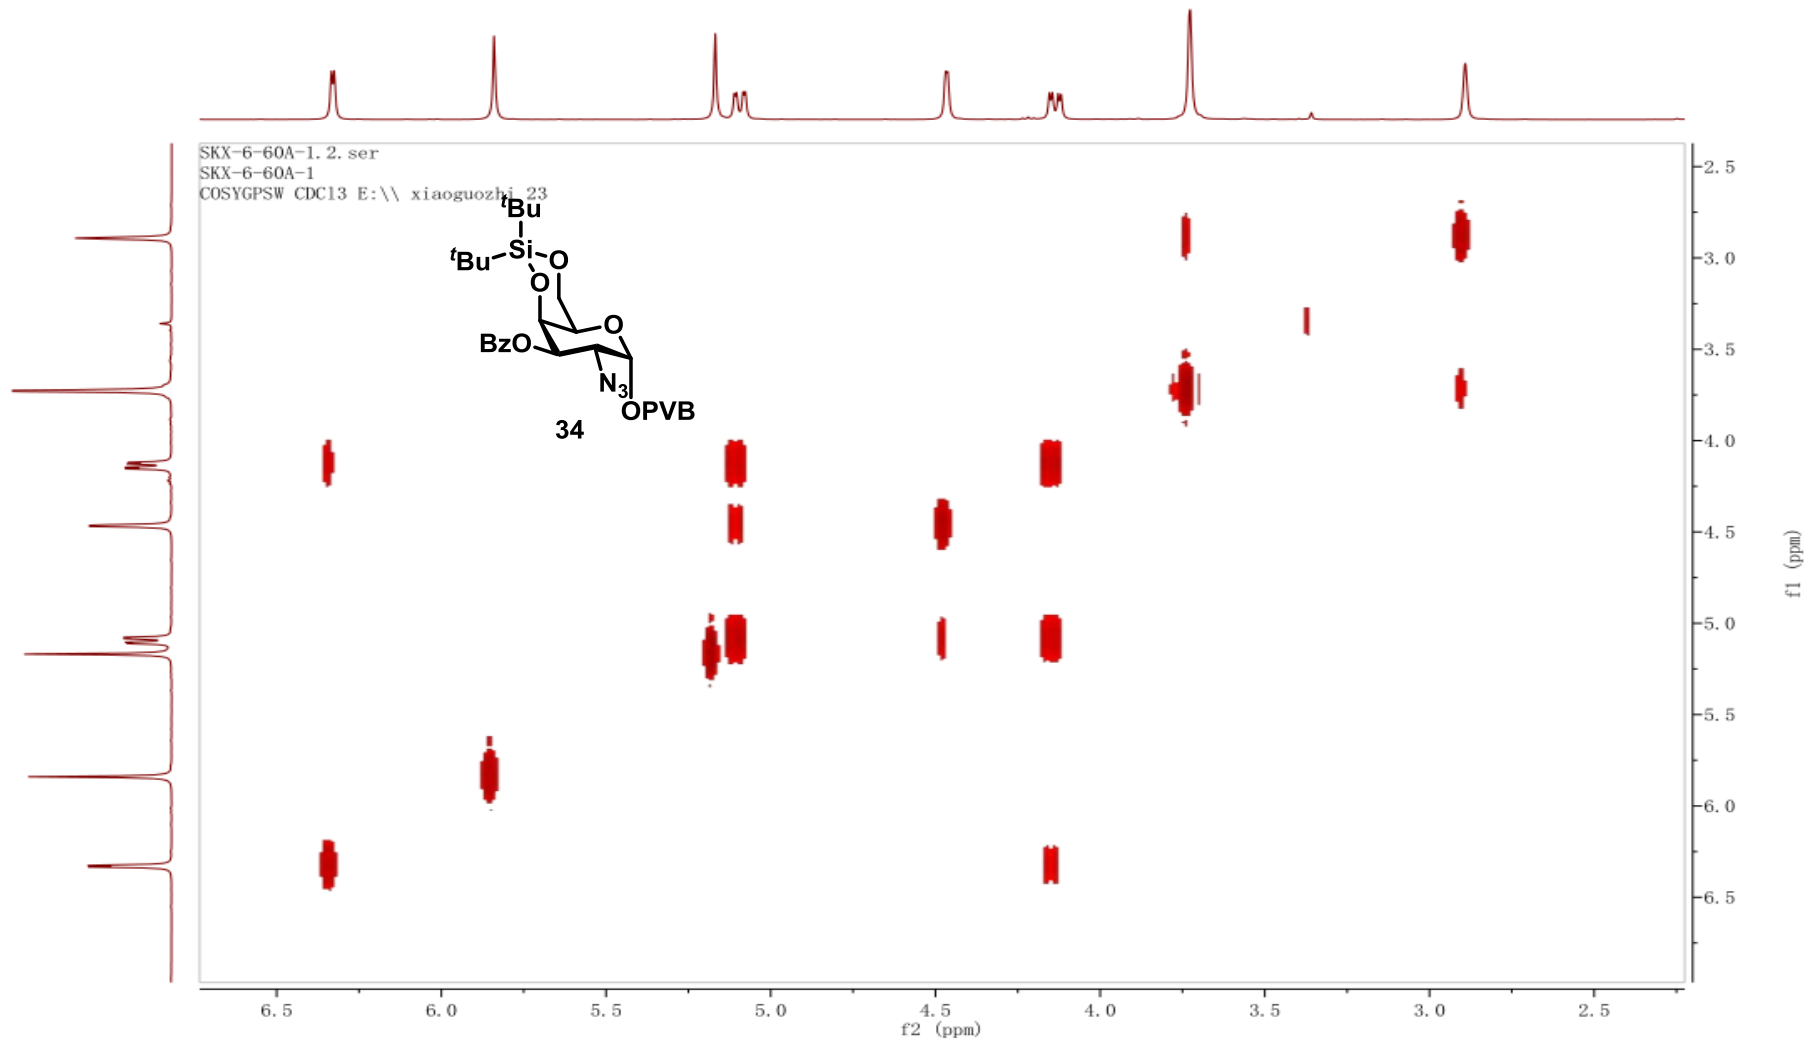

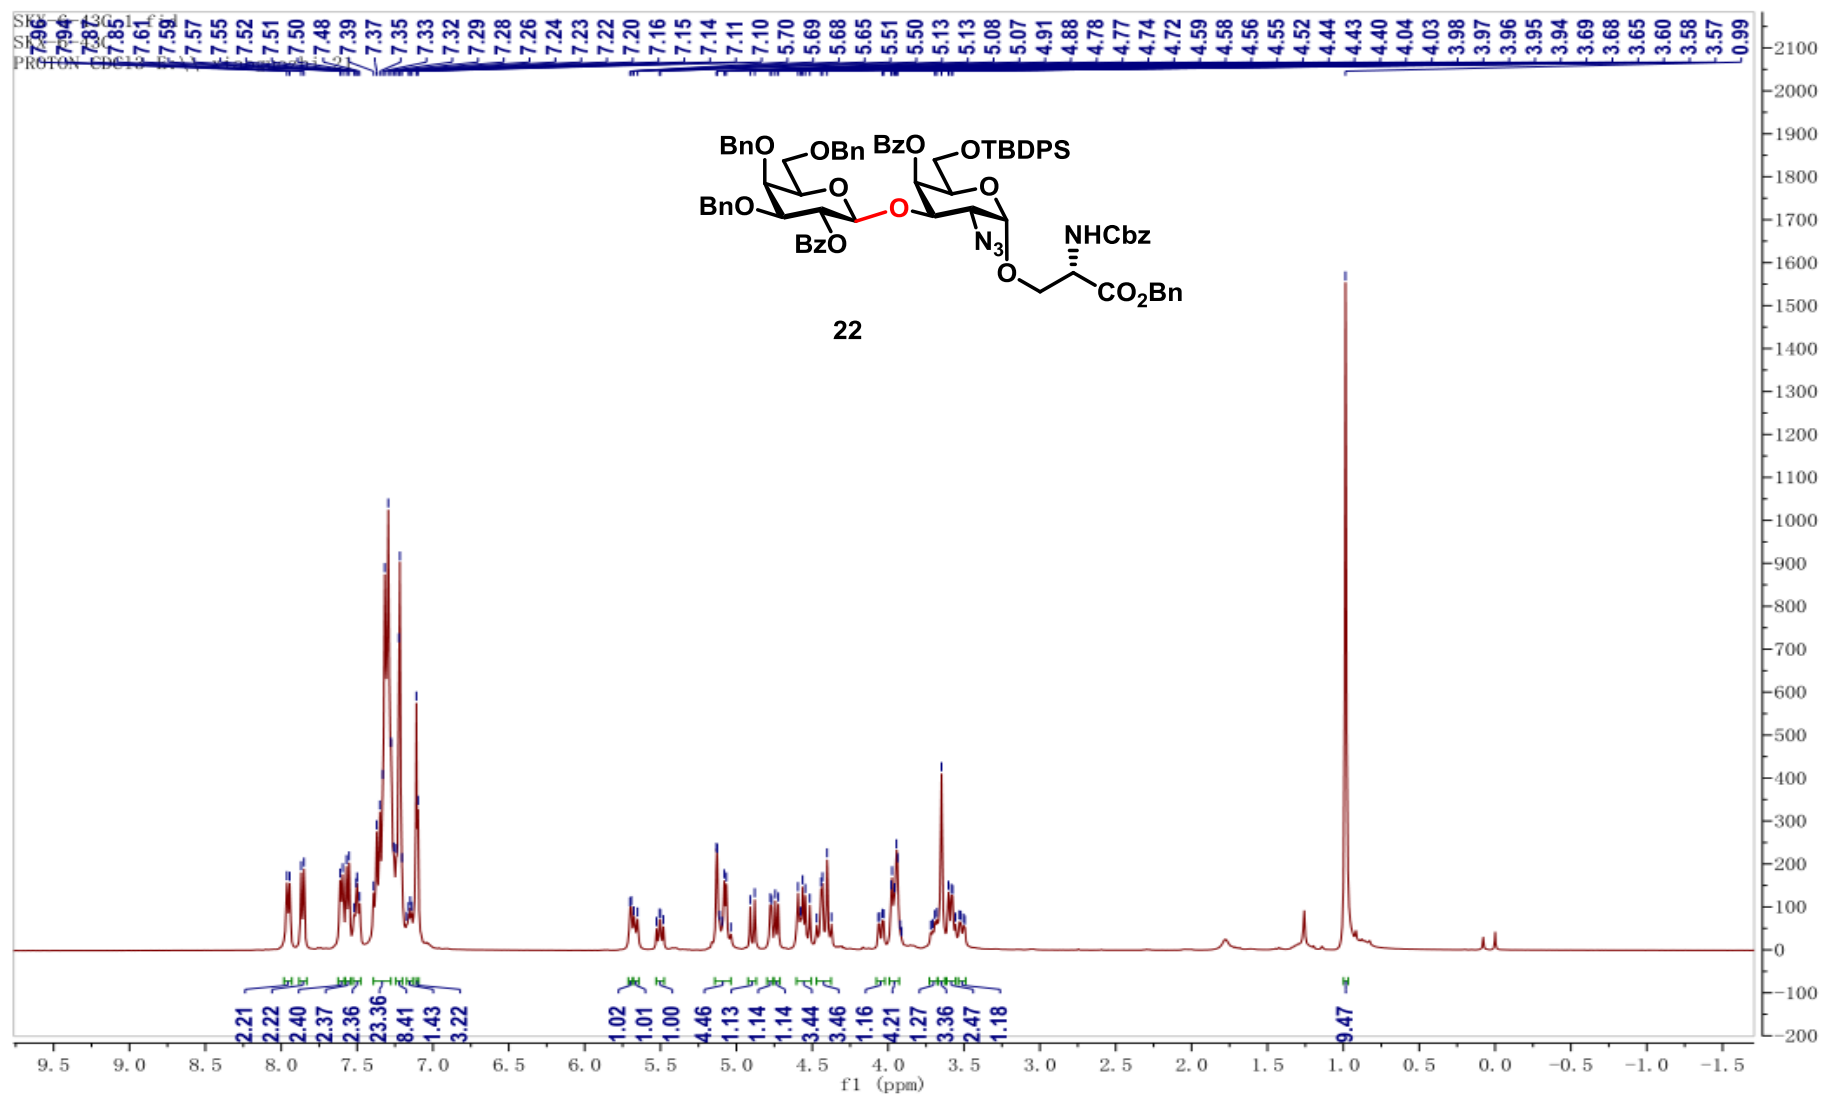

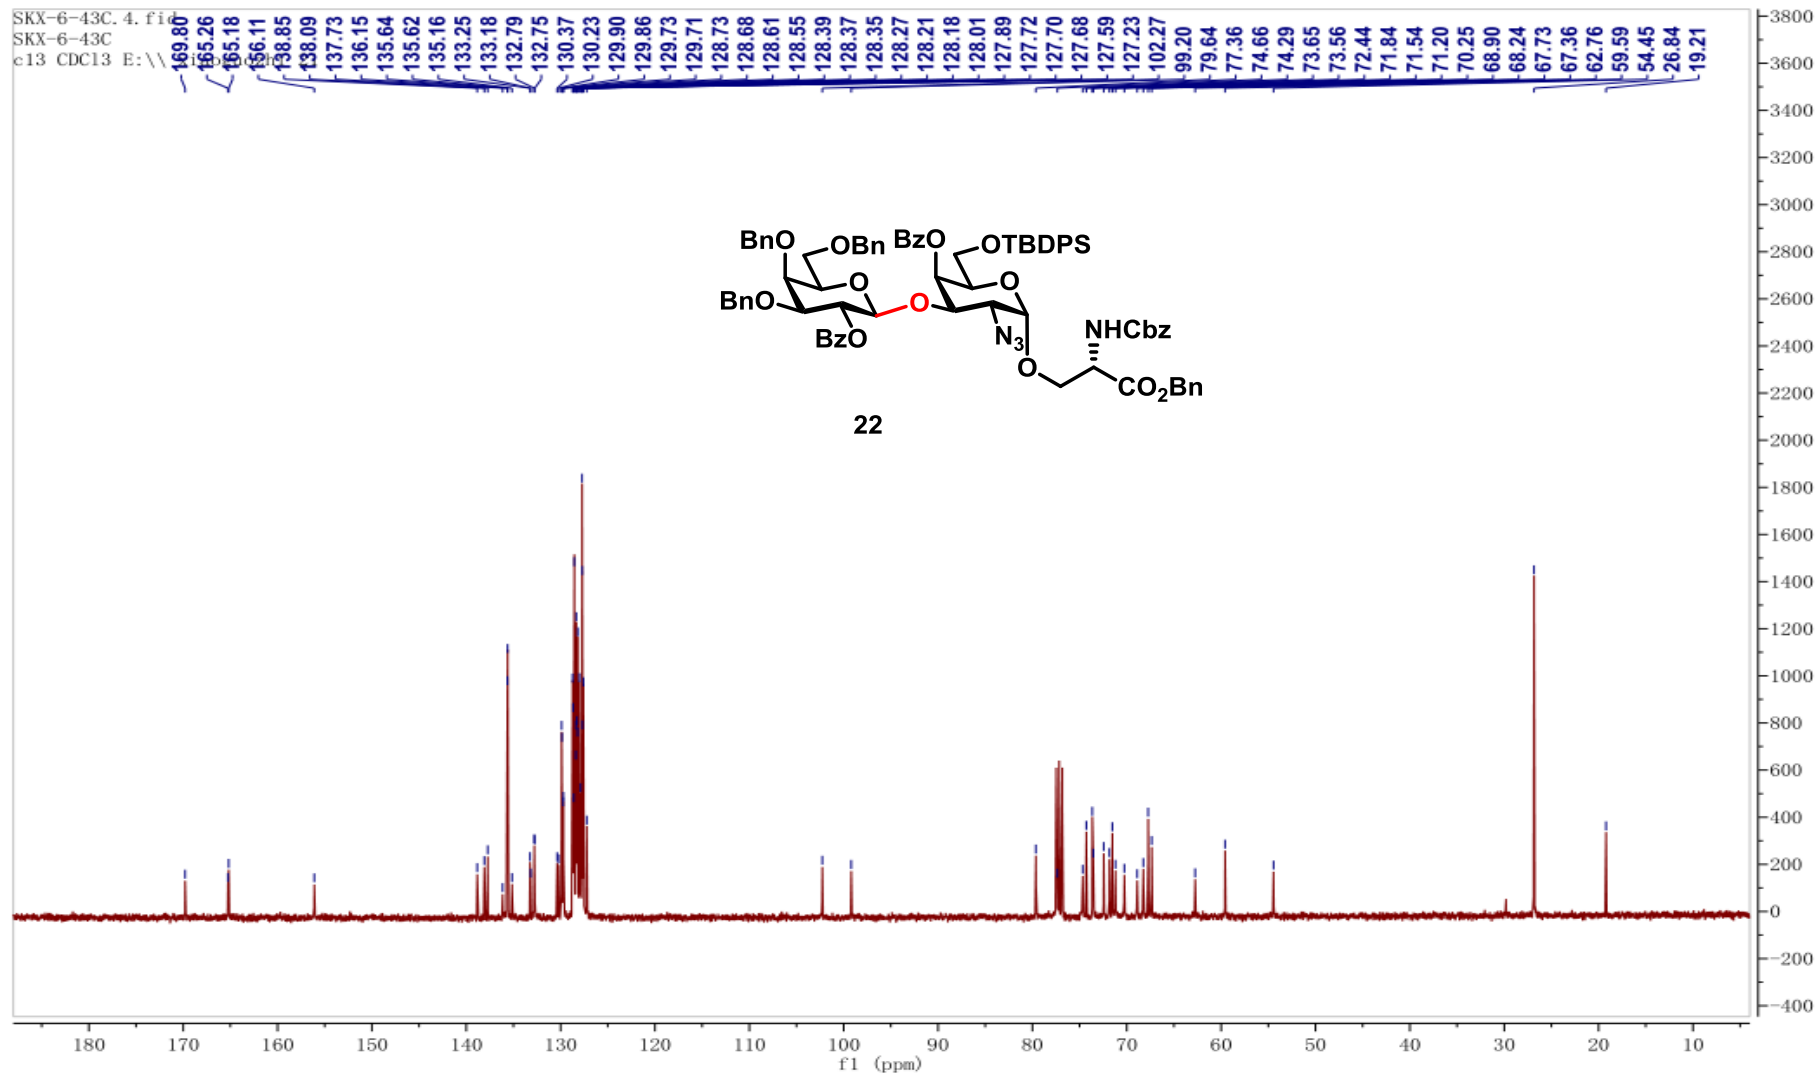

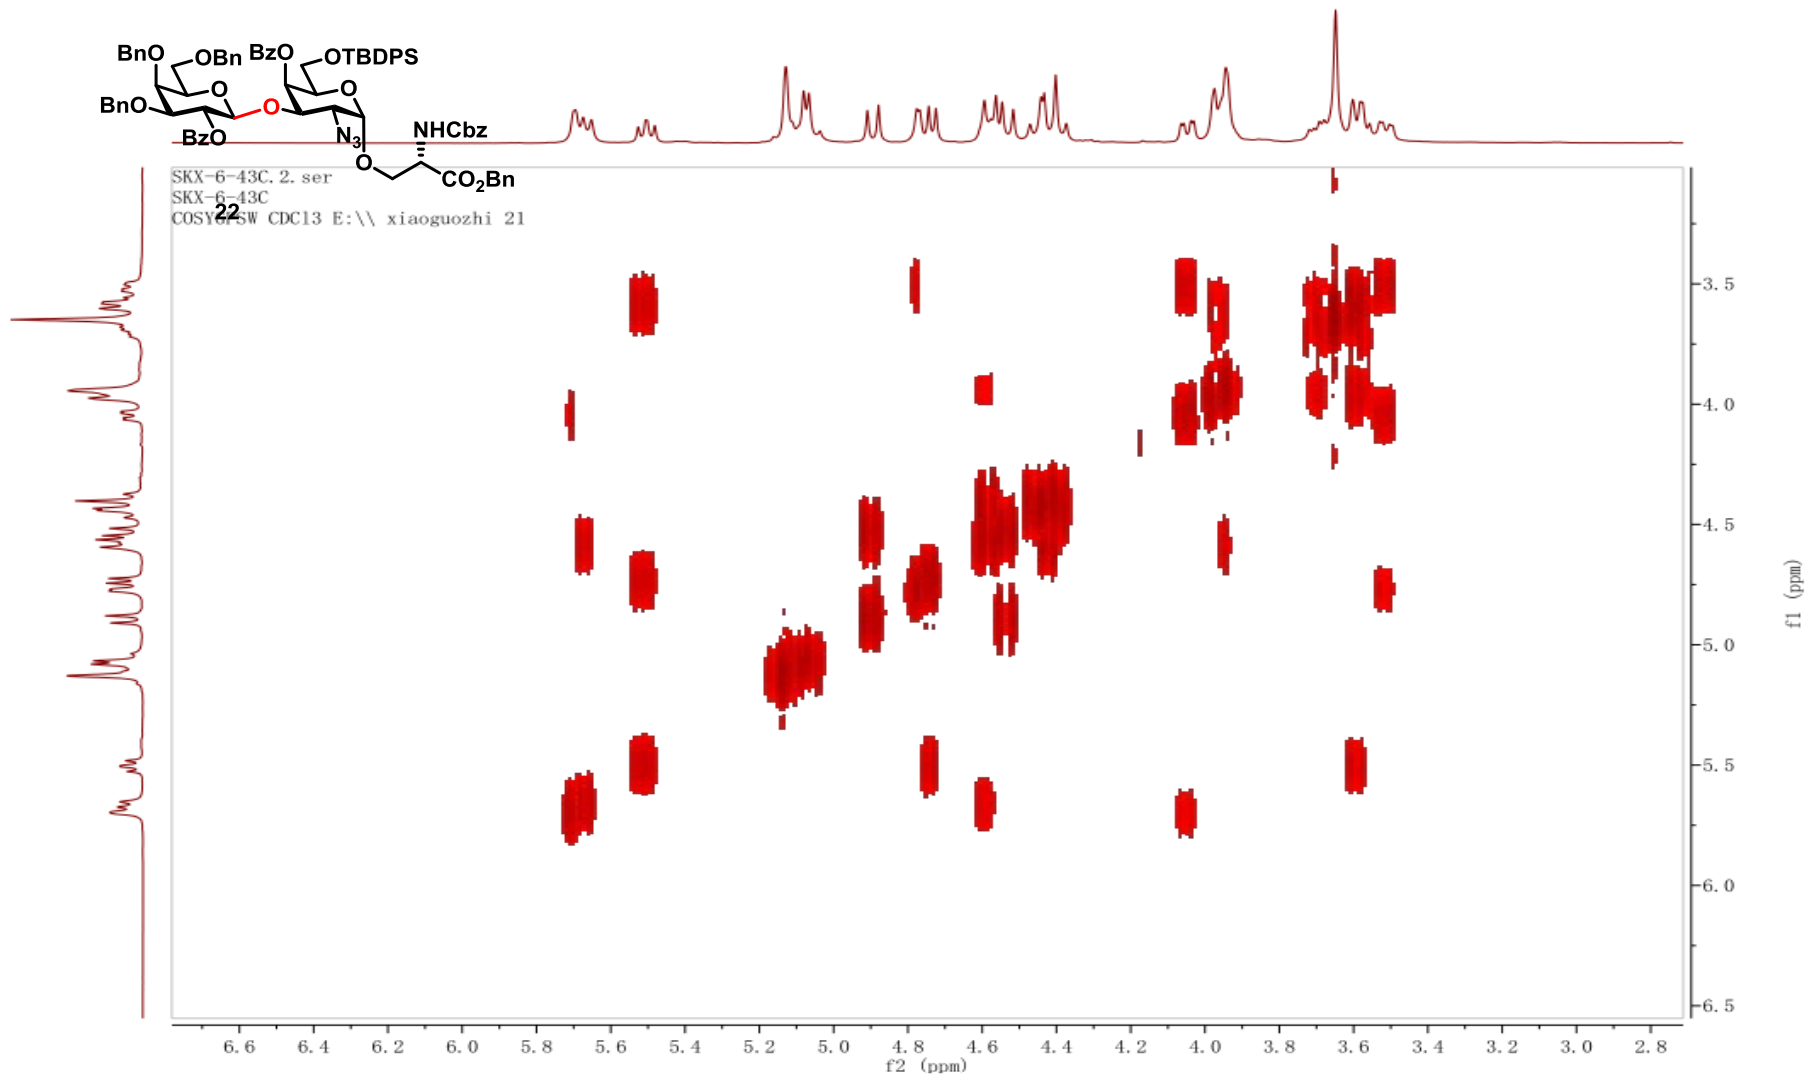

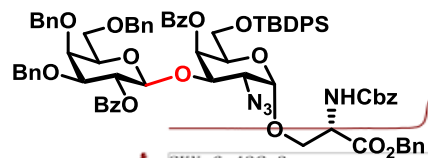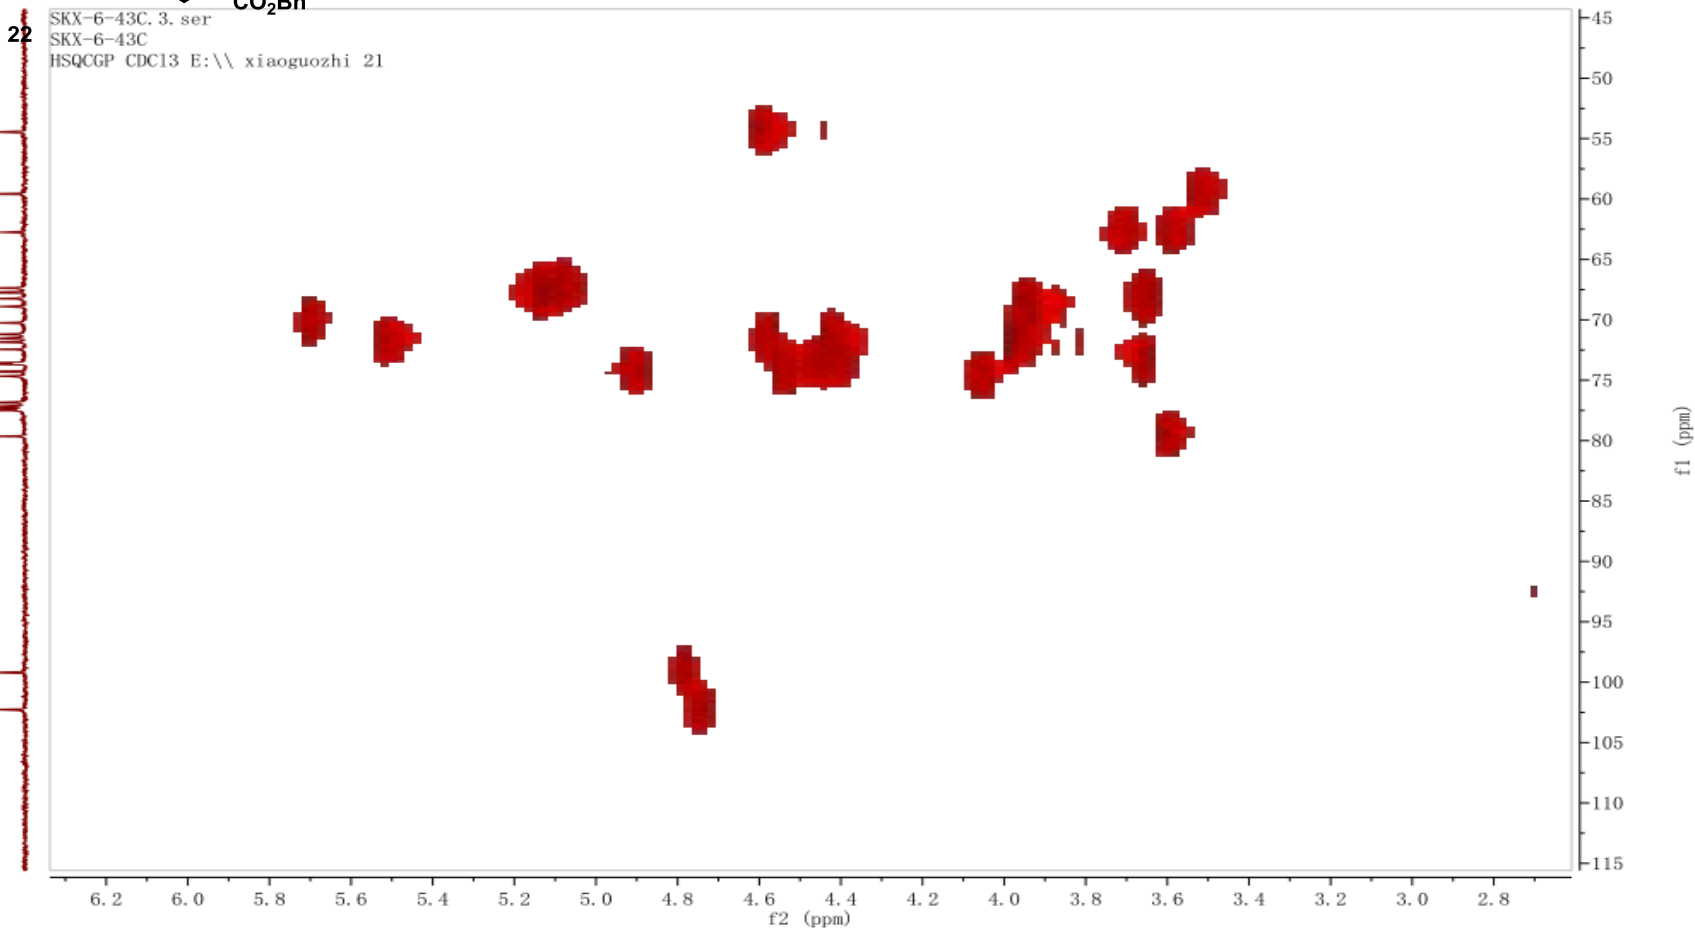

X-QZ-17-4C  
X-QZ-17-4C  
PROTON D2O E:\ xiaoguozhi 8

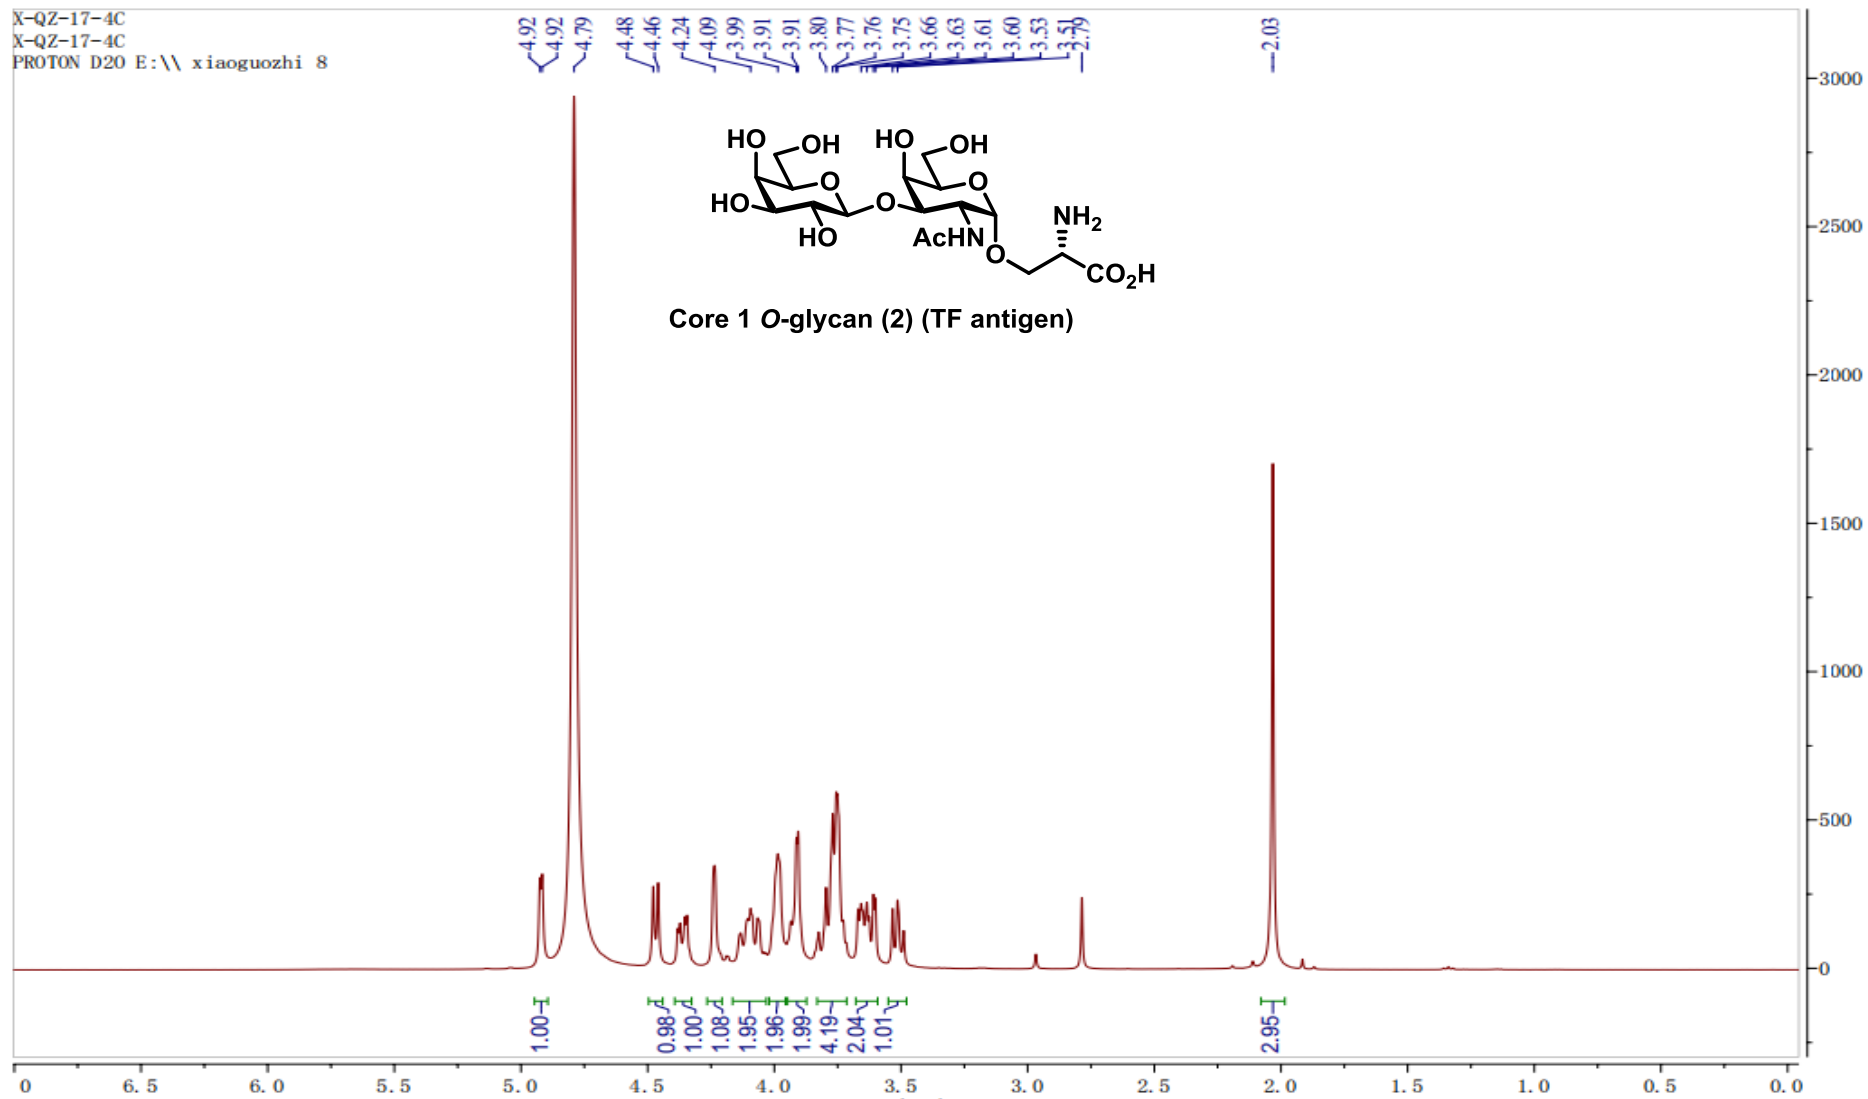



X-QZ-17-4C  
X-QZ-17-4C  
c13 D20 E:\\ xiaoguozi 8

174.72  
171.84

104.67  
98.28

76.75  
75.06  
72.62  
71.22  
70.72  
68.75  
68.69  
61.32  
61.10

48.47

22.22

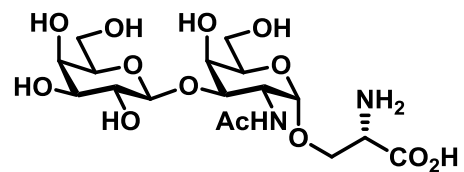

Core 1 O-glycan (2) (TF antigen)

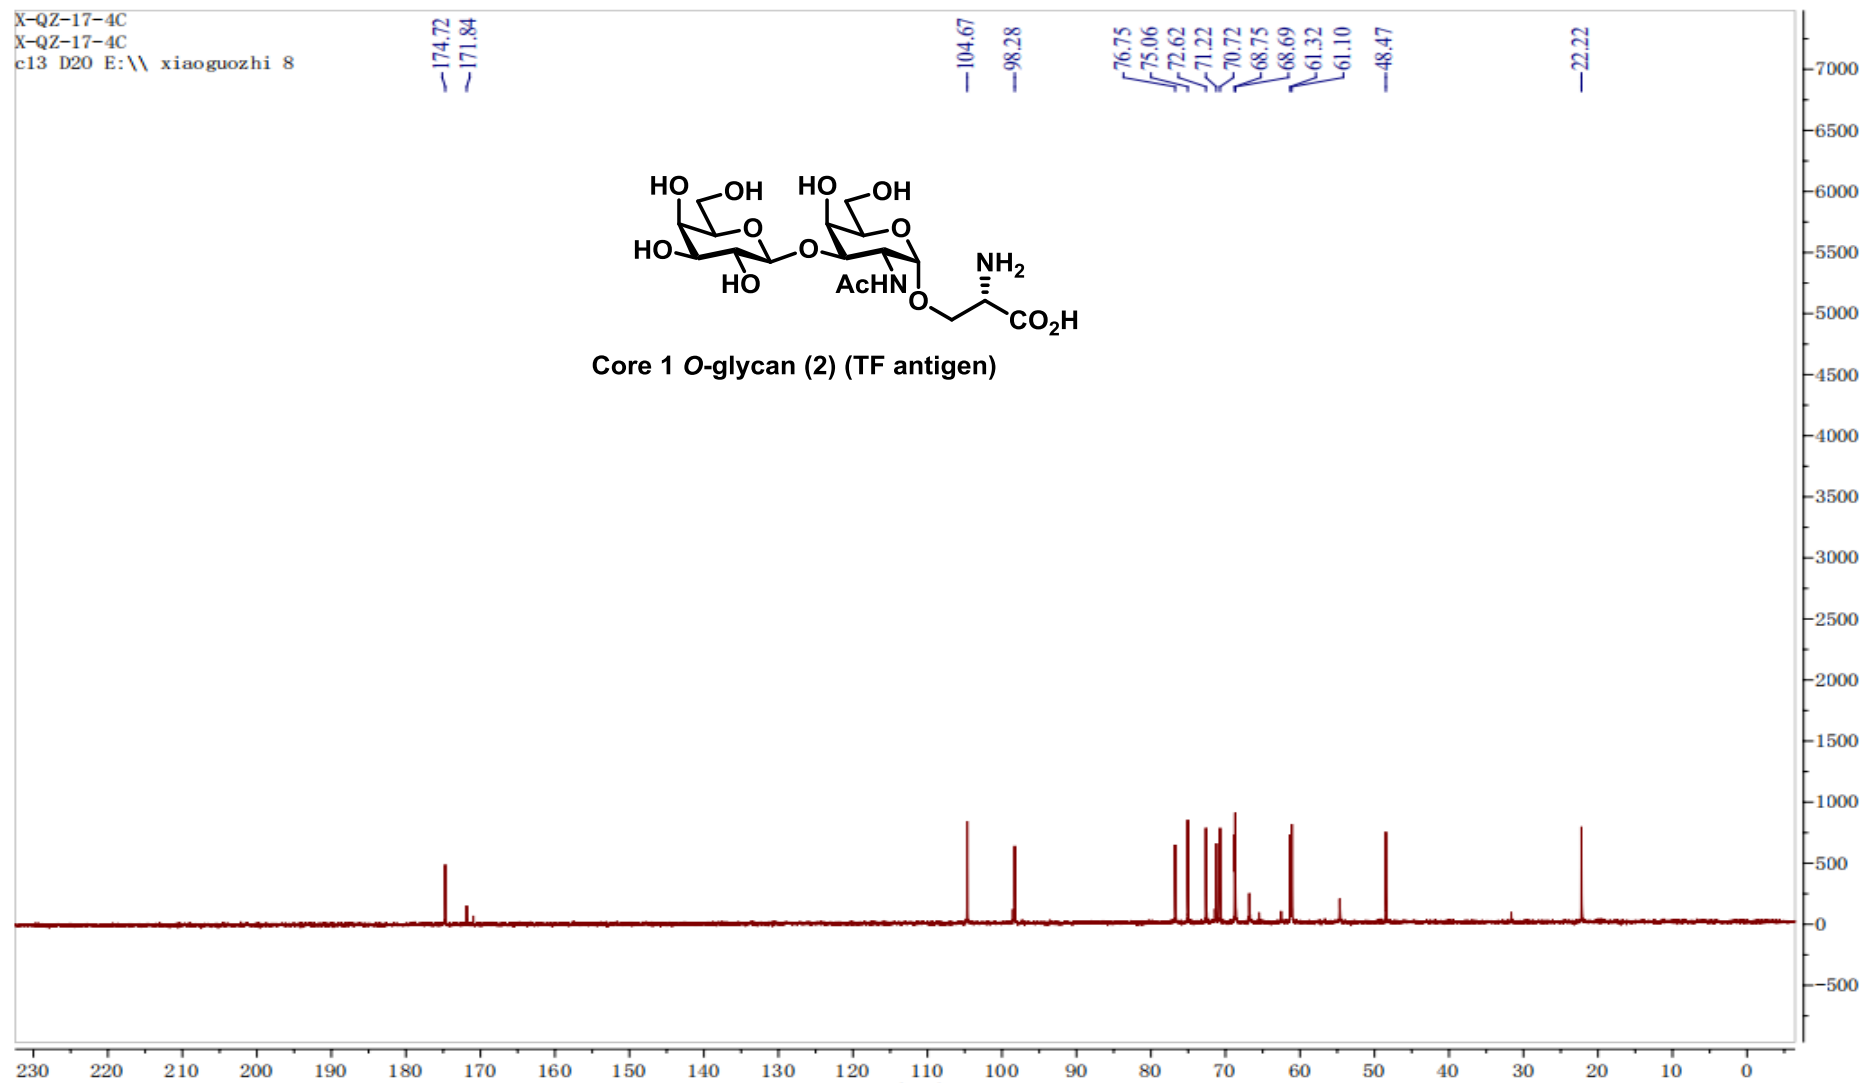

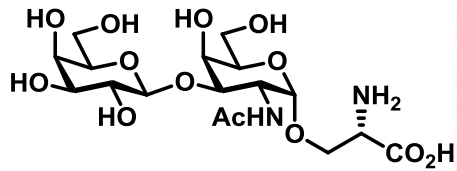

Core 1 O-glycan (2) (TF antigen)

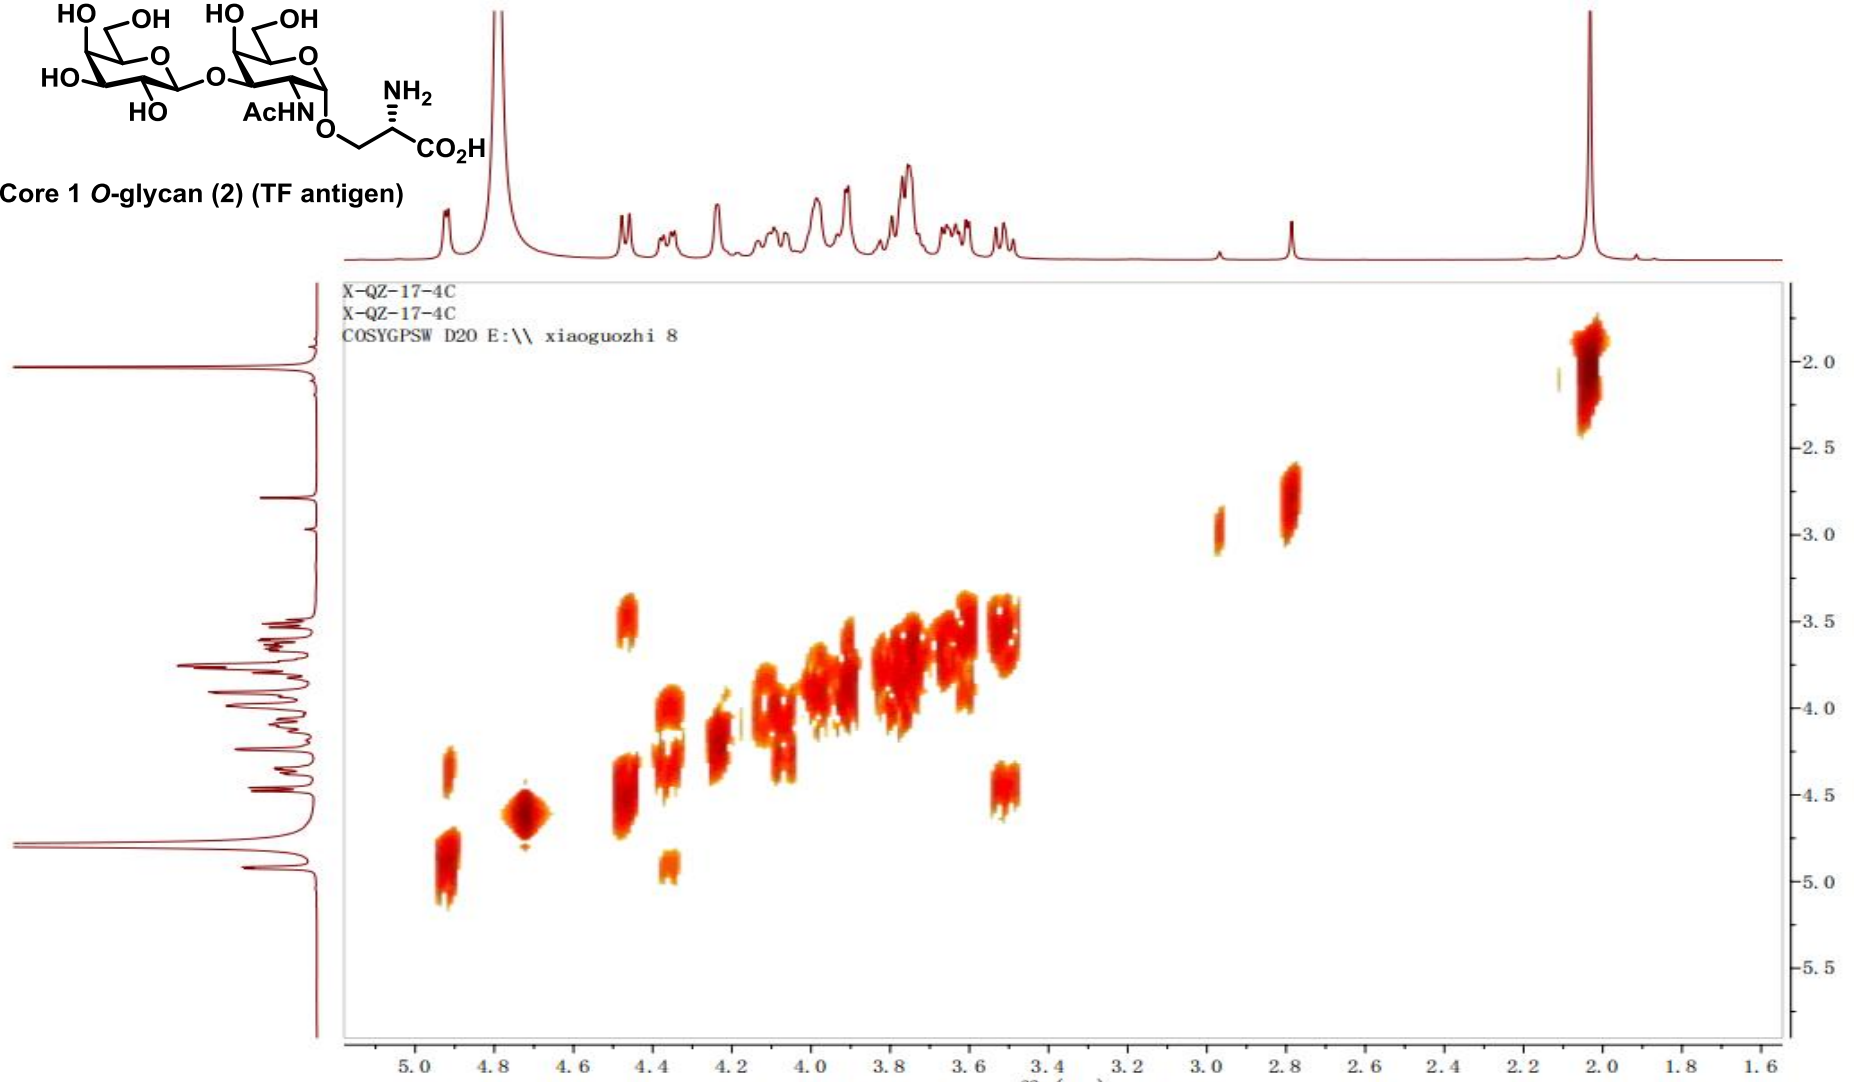

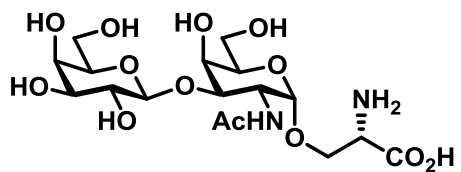

Core 1 O-glycan (2) (TF antigen)

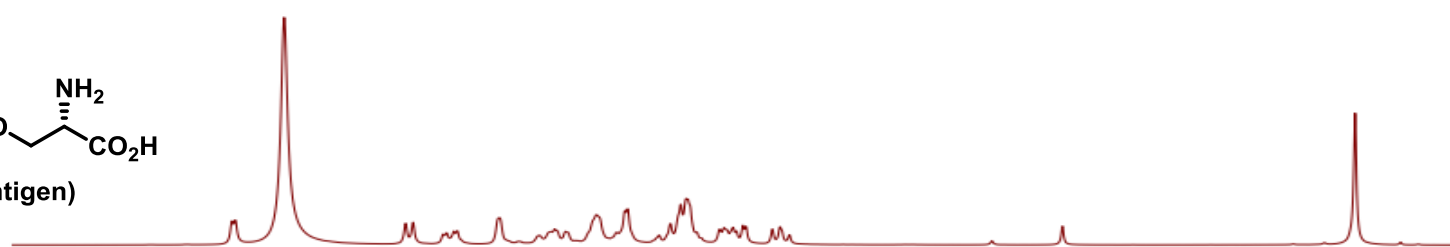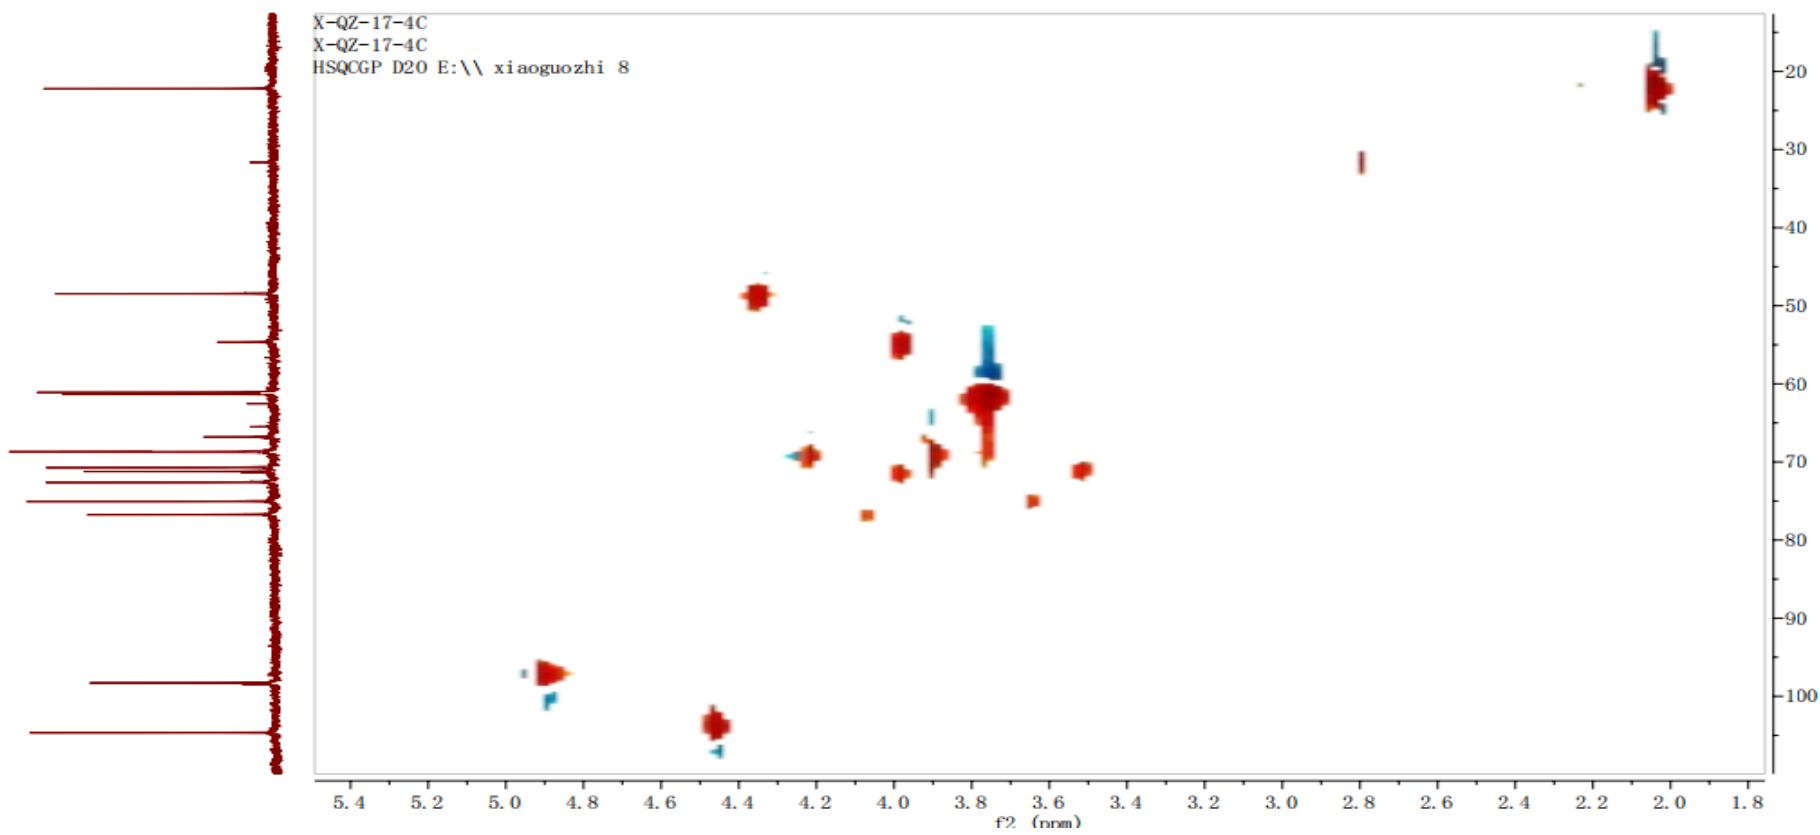

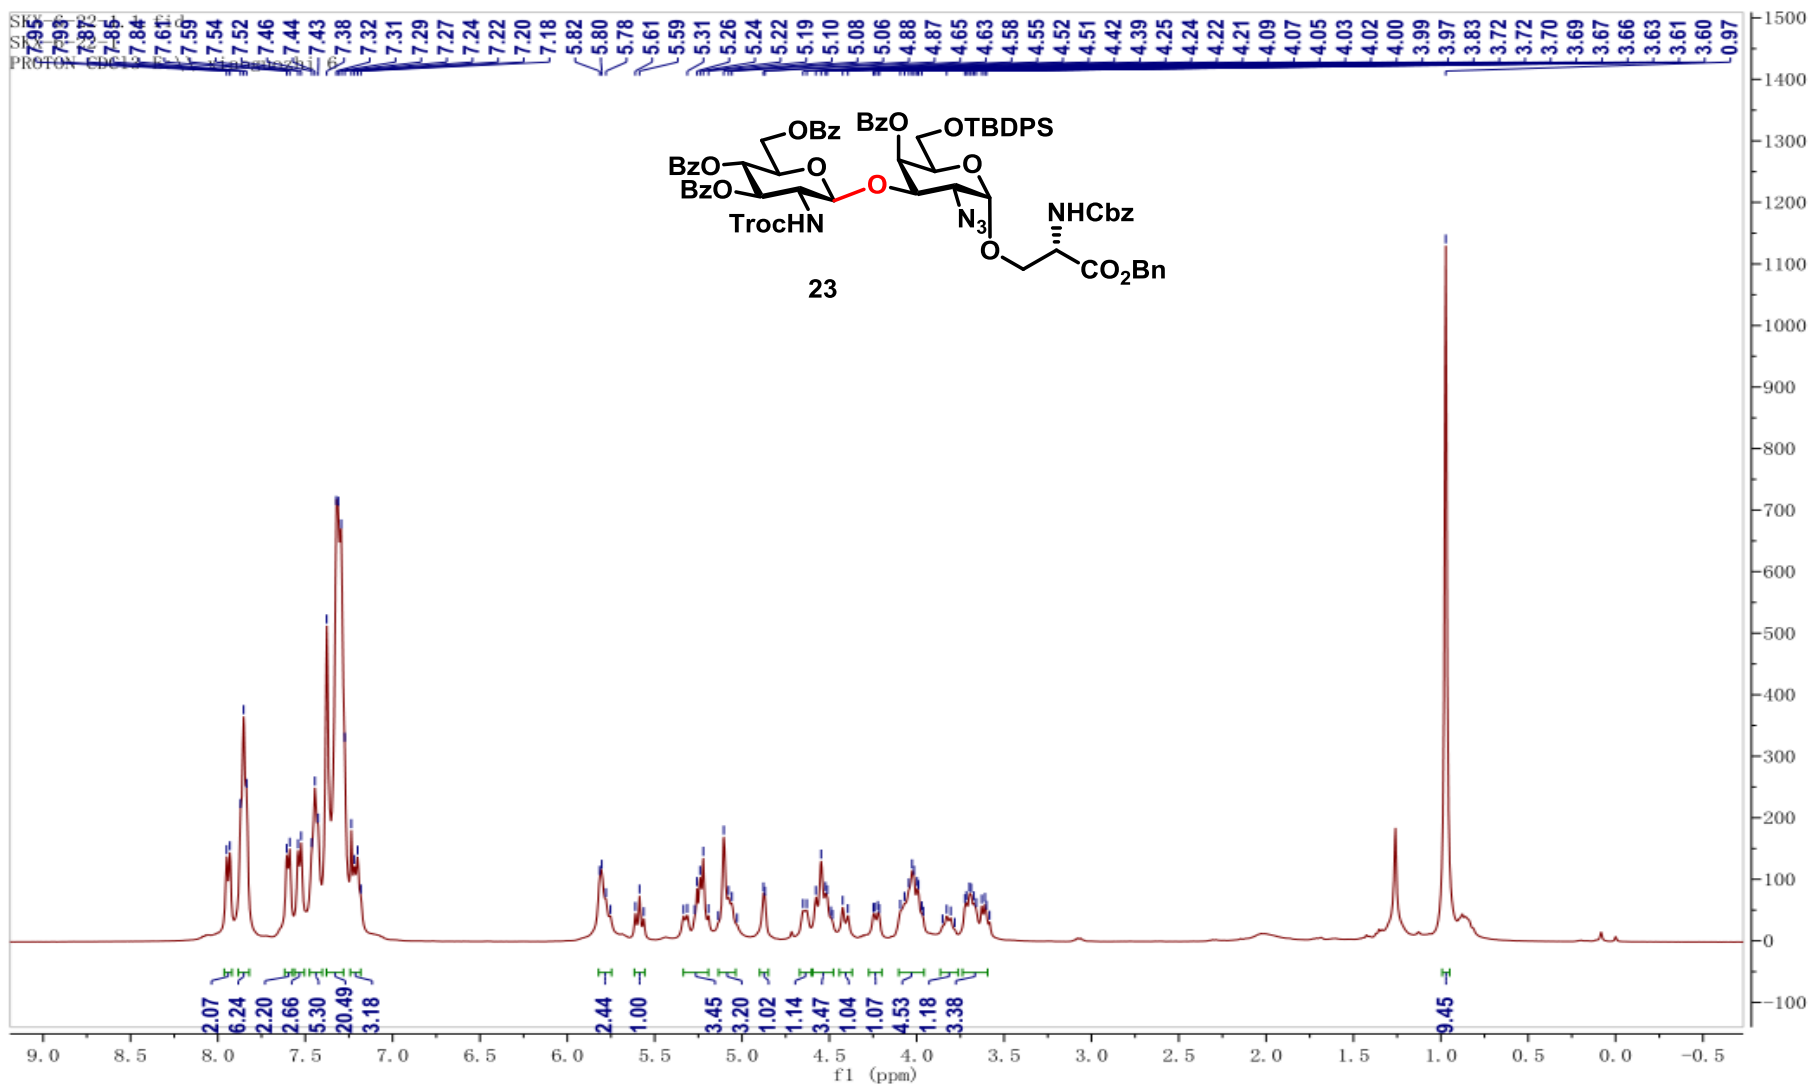

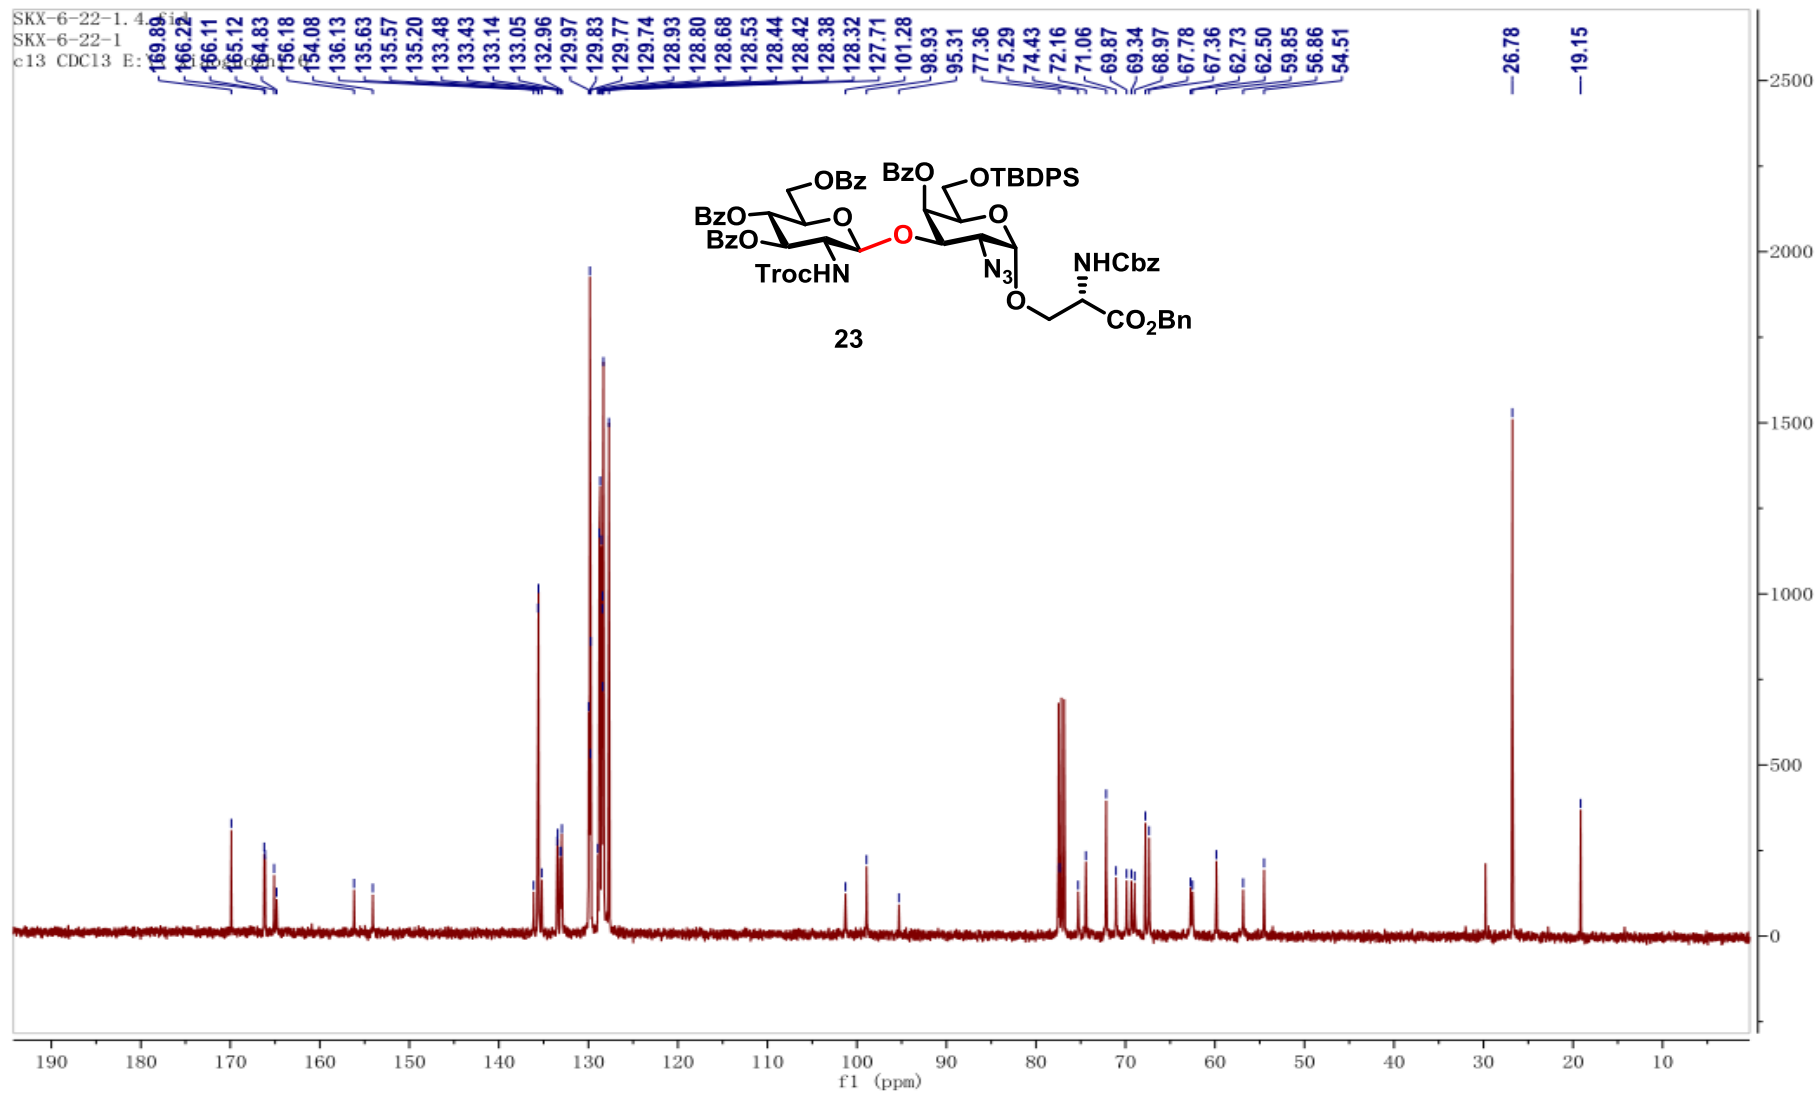

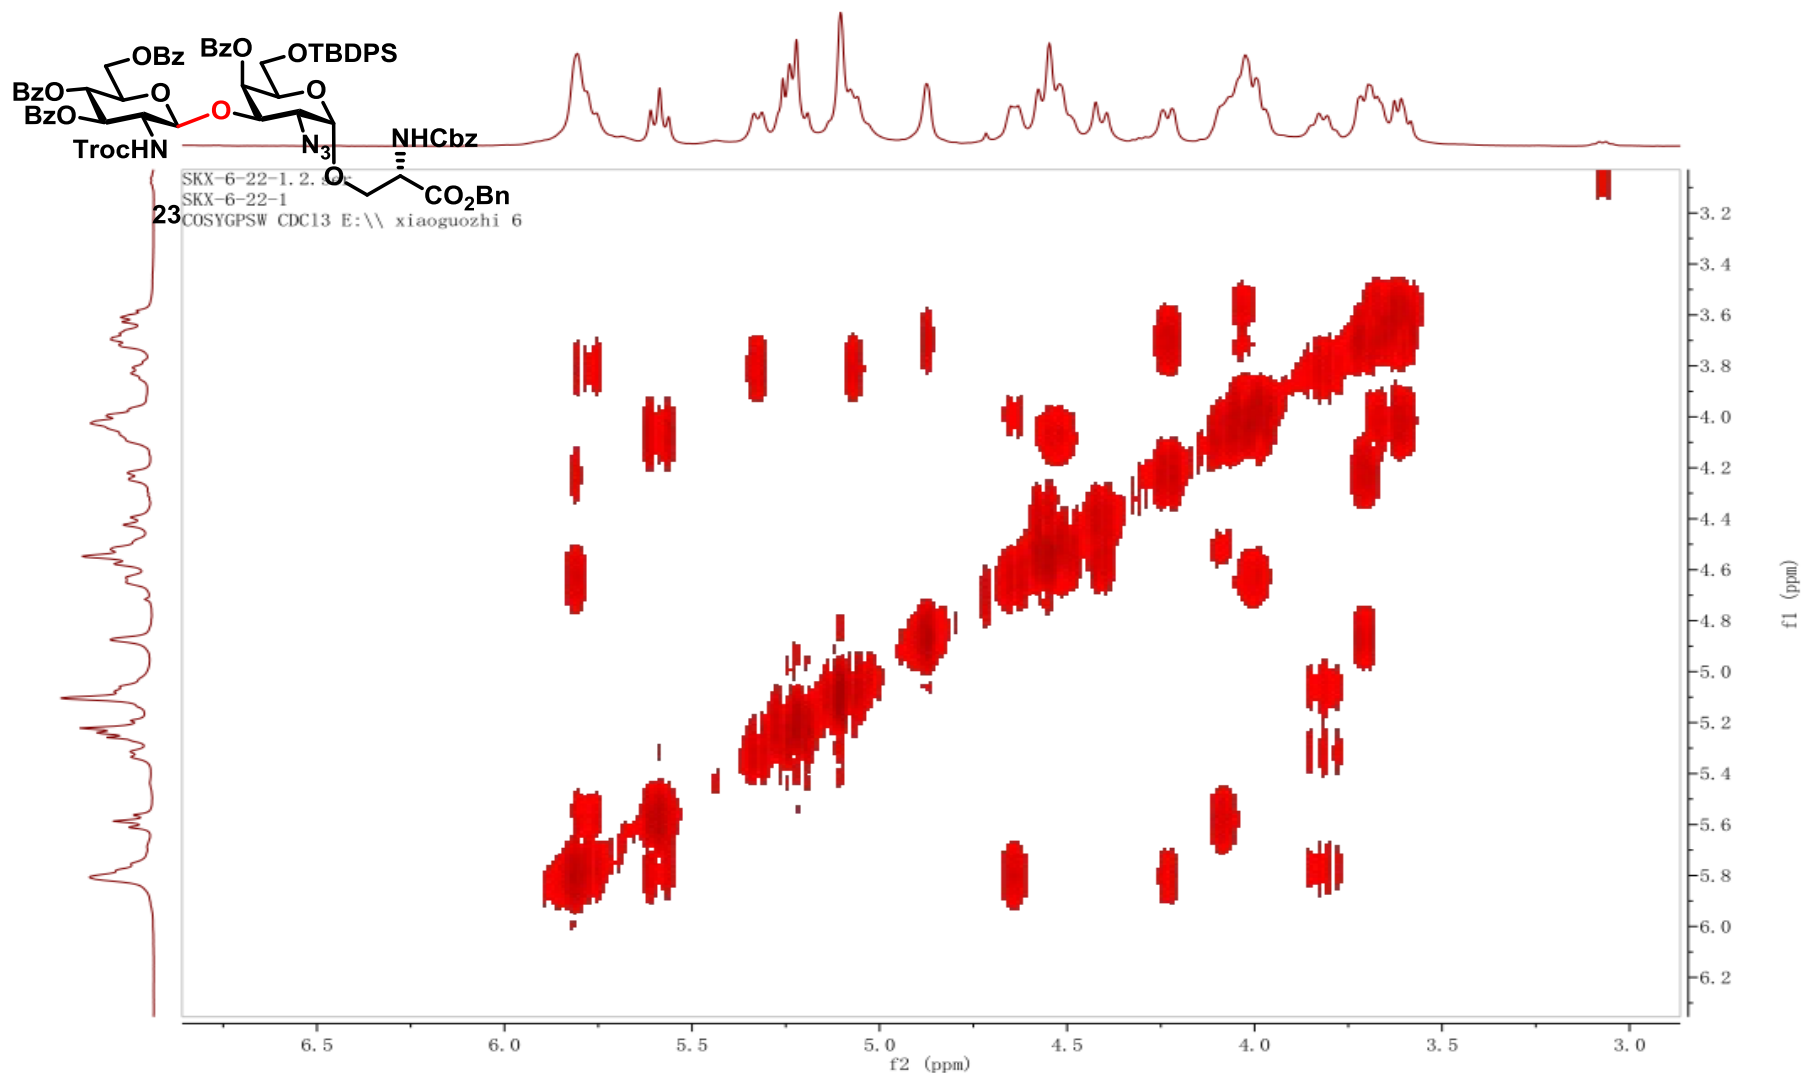

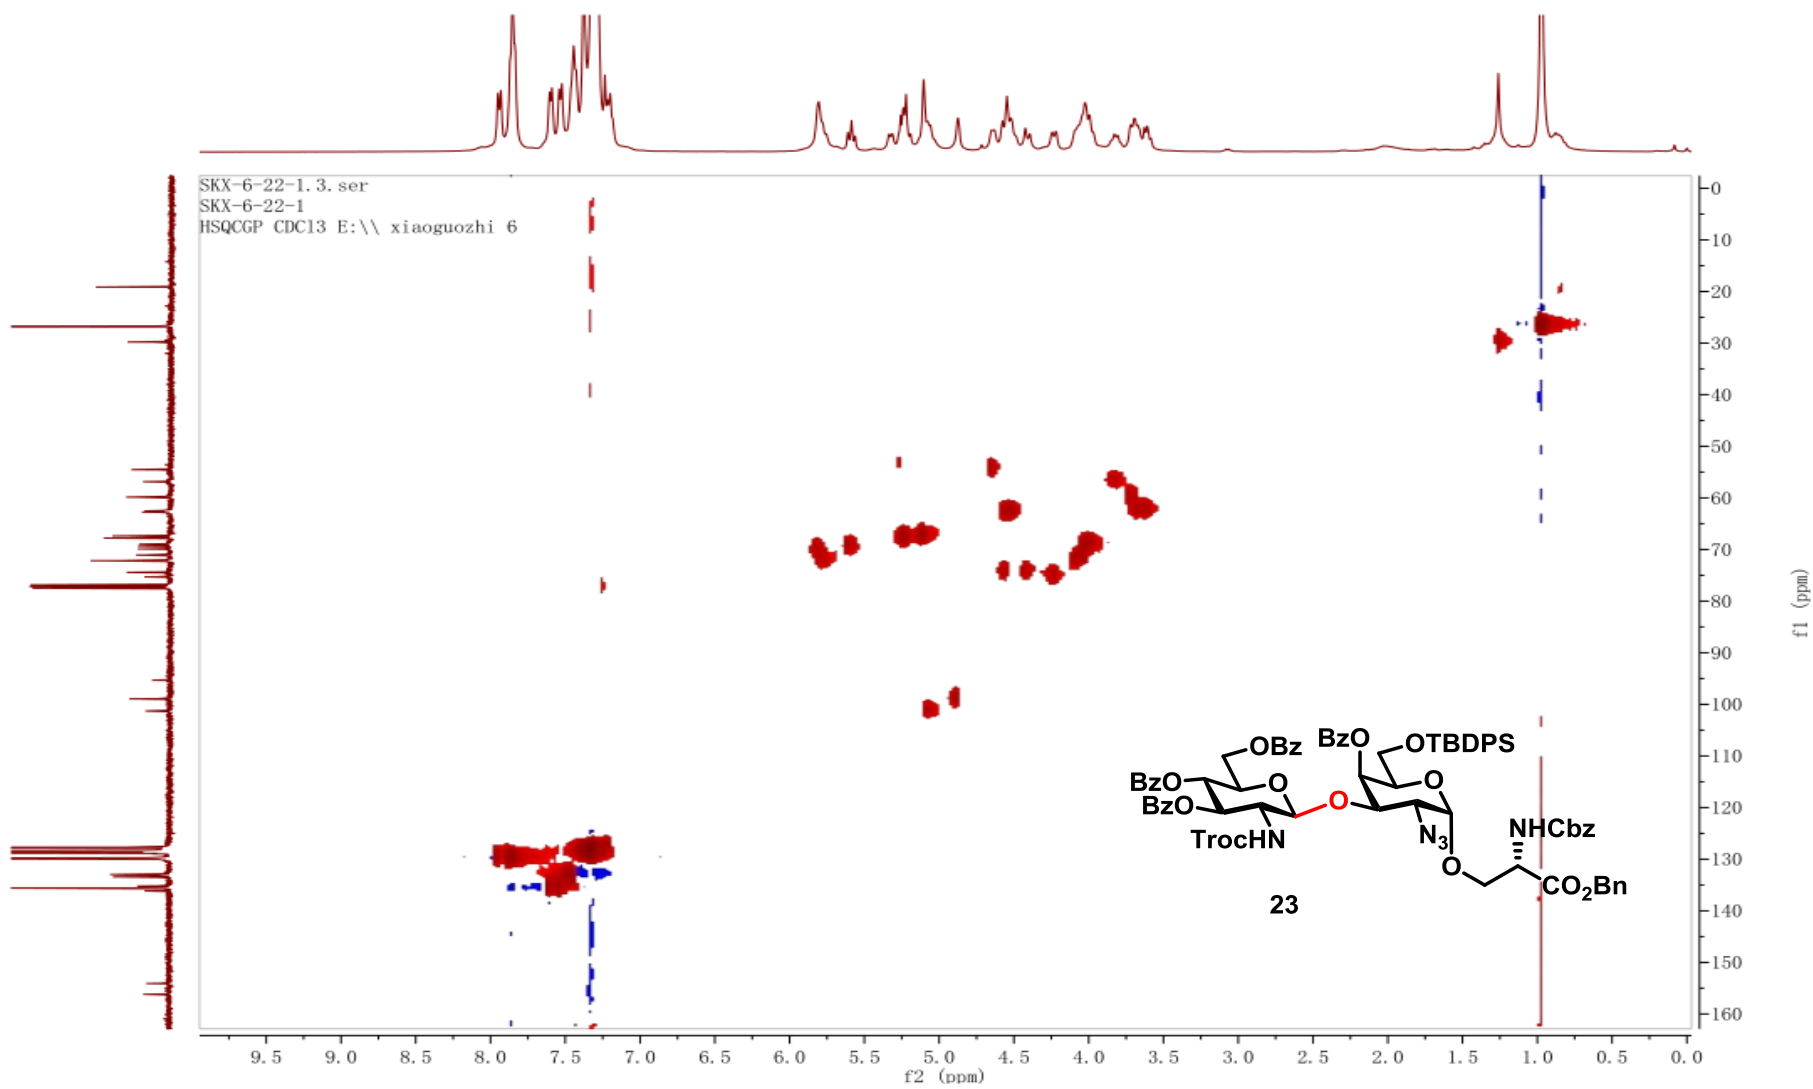

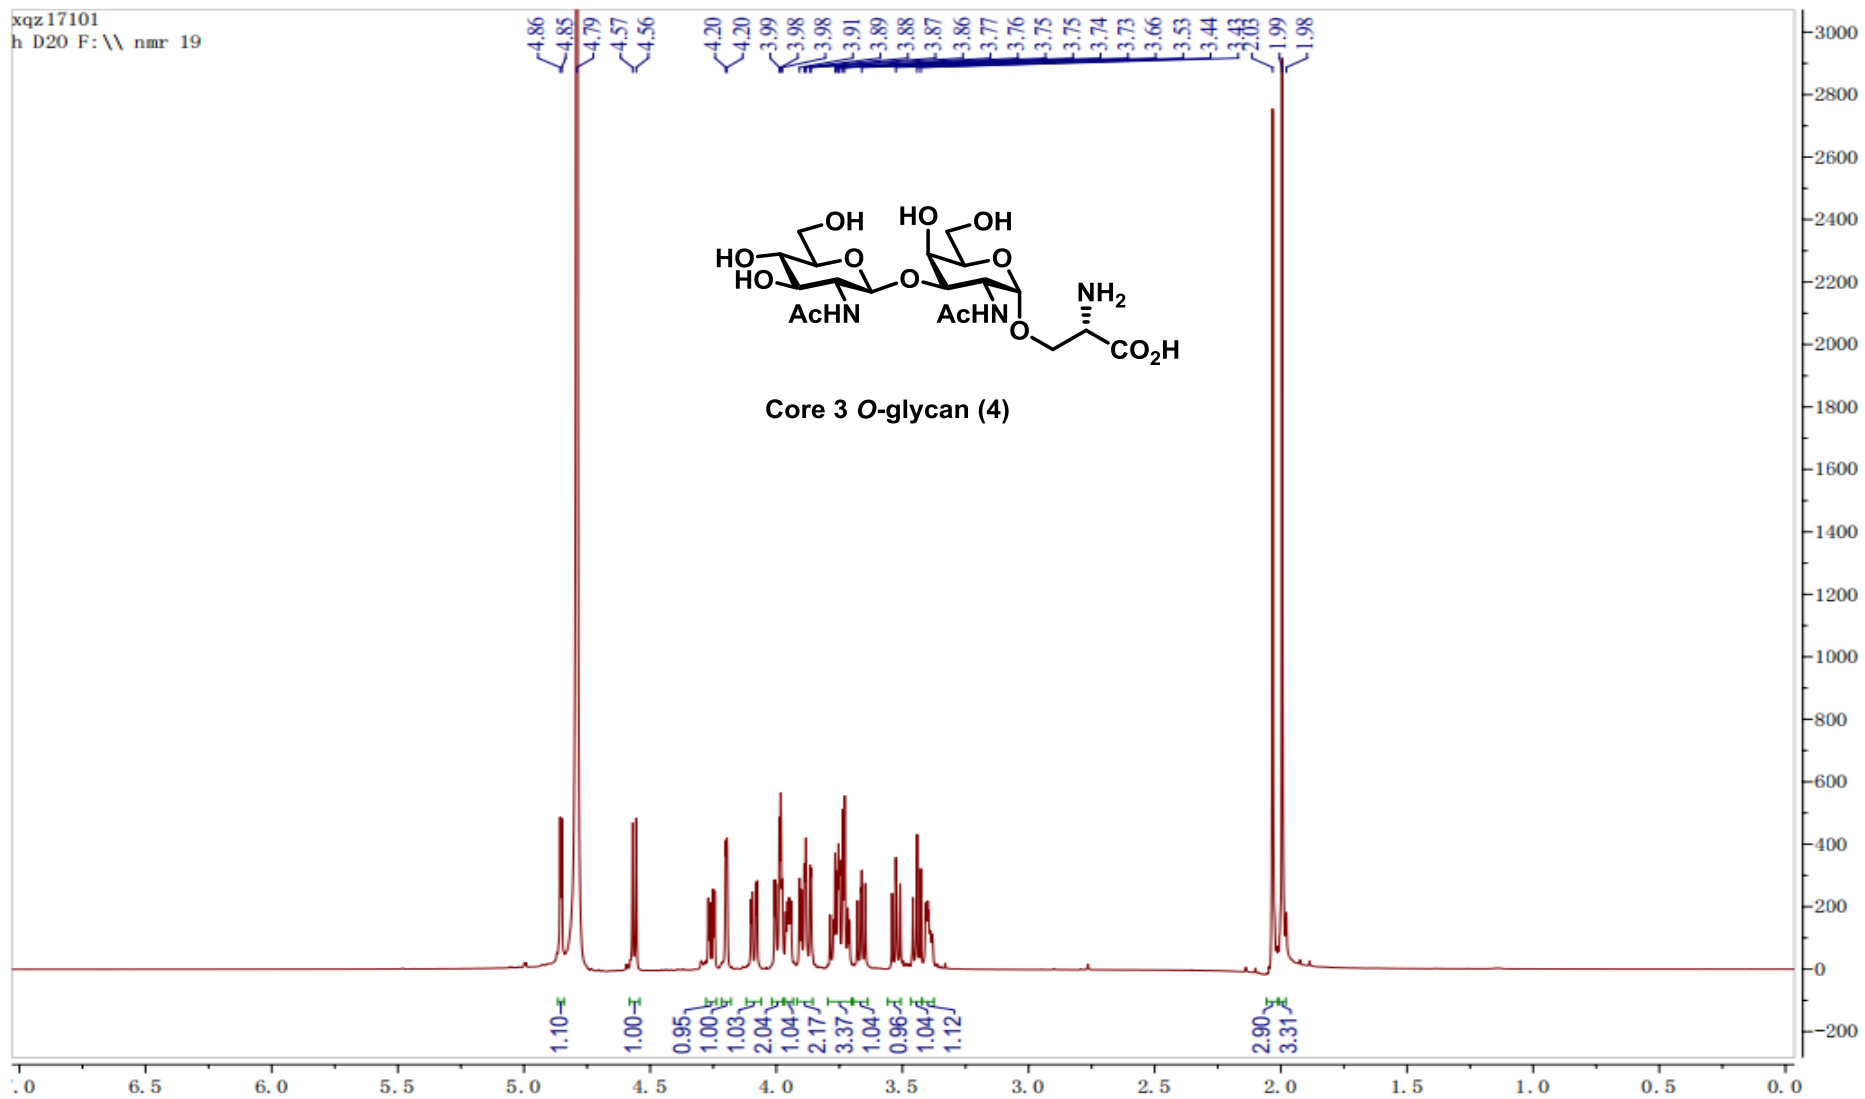



xqz17101  
c13 D20 F:\ nmr 19

174.38  
173.73  
171.66

102.34  
98.06

76.06  
75.53  
73.33  
70.93  
69.61  
68.58  
66.57  
61.17  
60.35  
55.53  
54.41  
48.14

22.15  
22.07

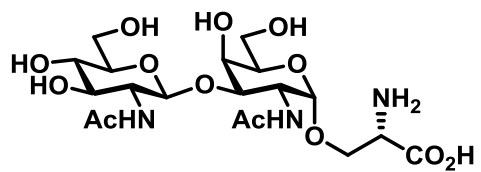

Core 3 O-glycan (4)

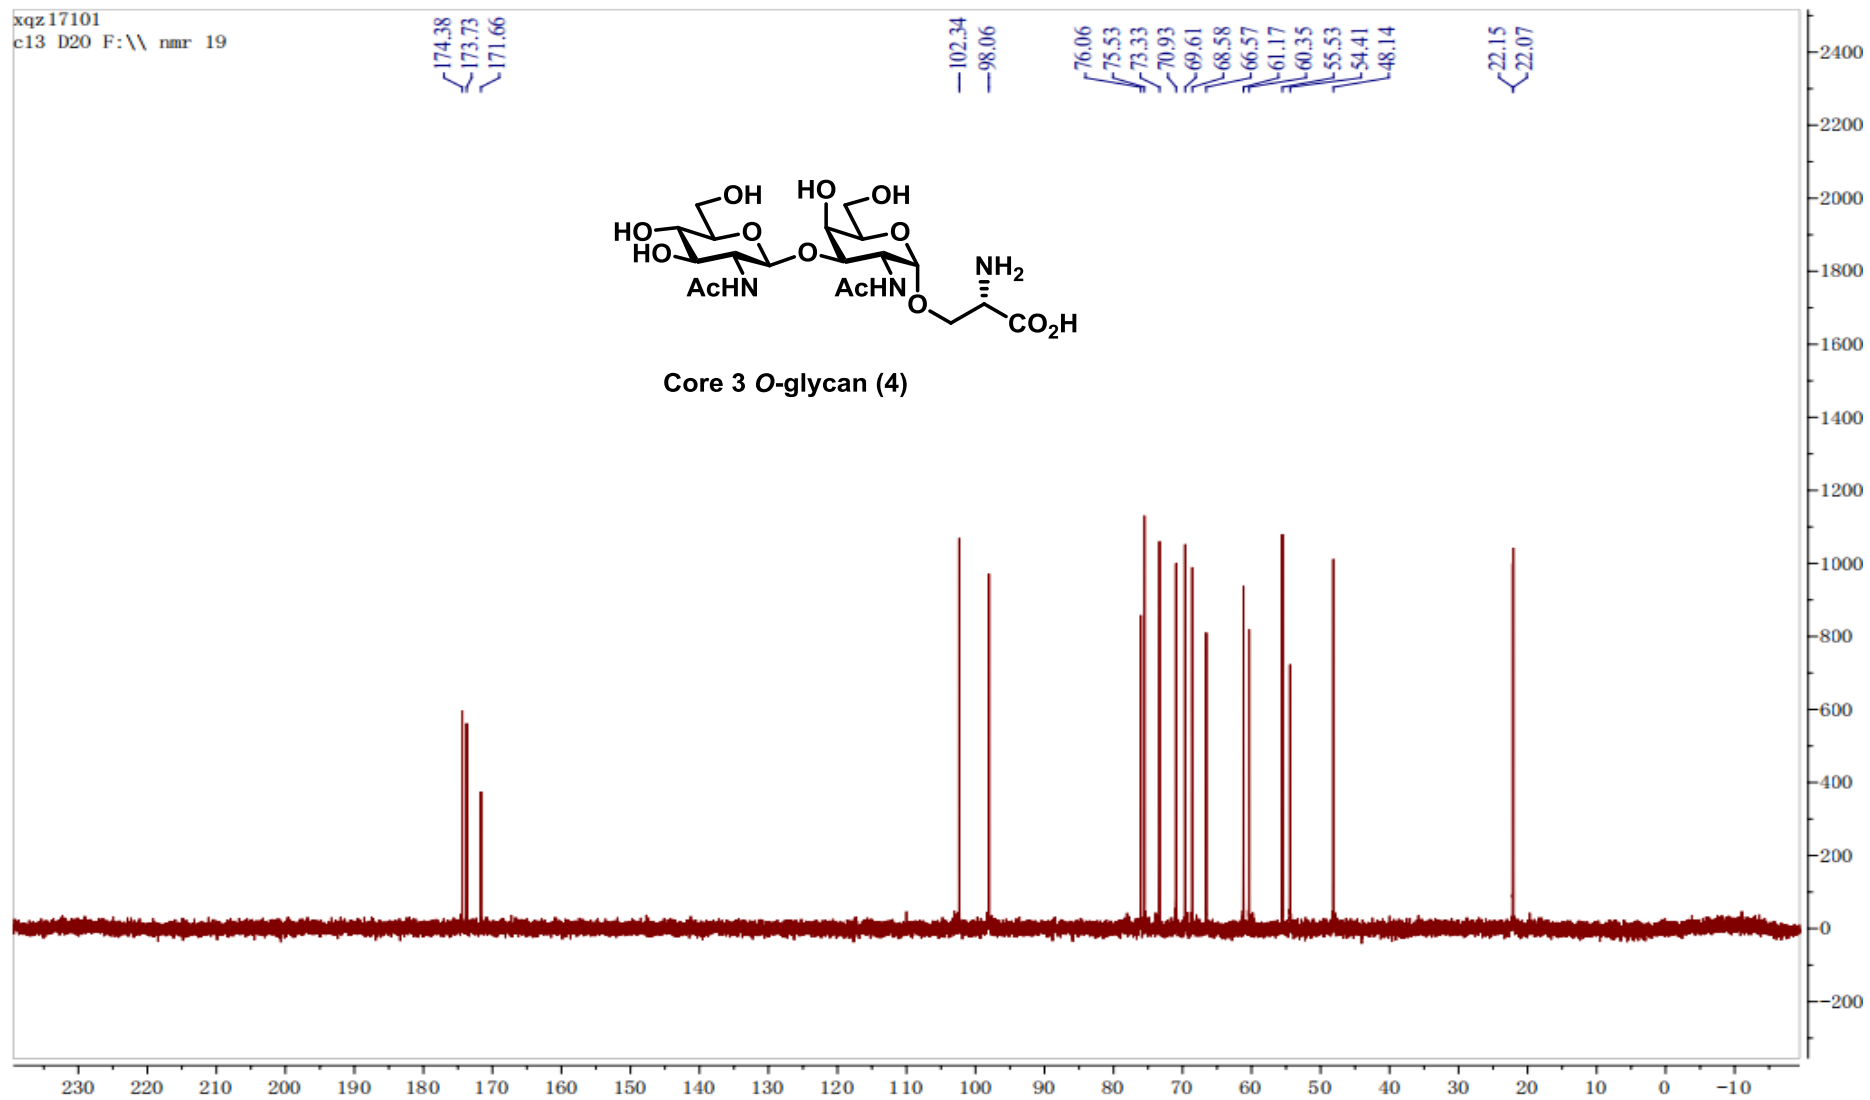

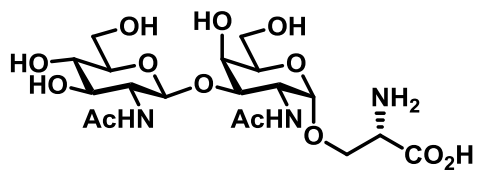

Core 3 O-glycan (4)

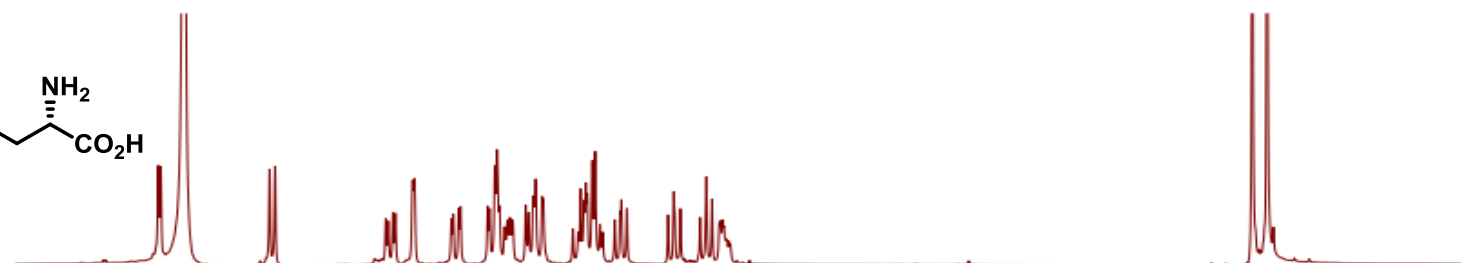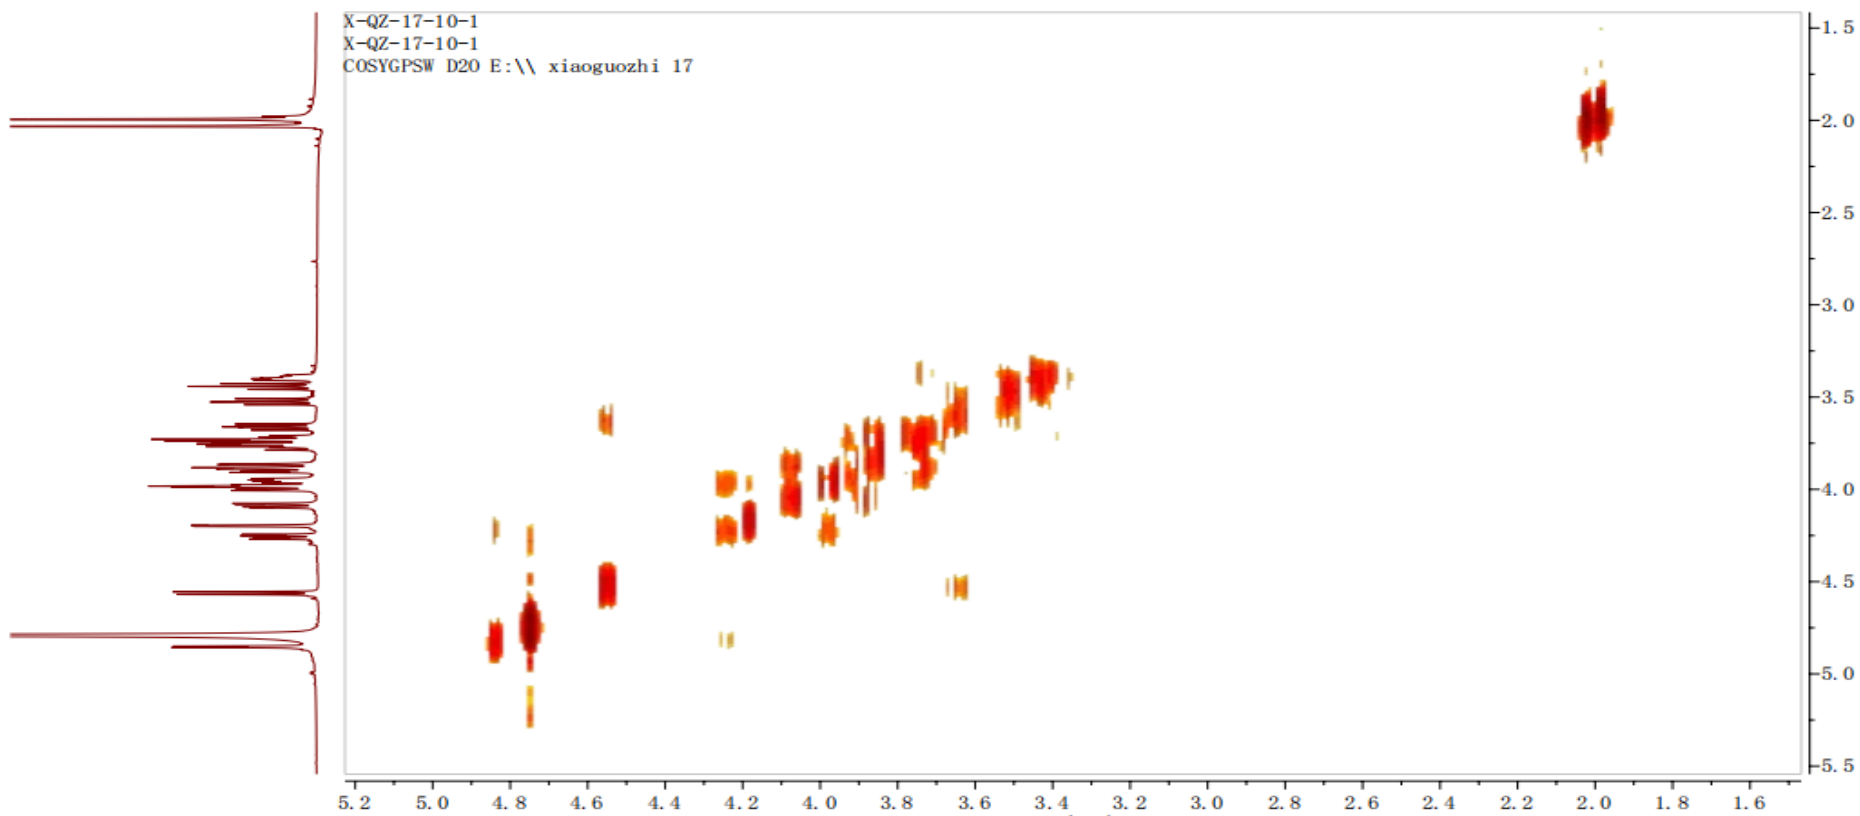



Core 3 O-glycan (4)

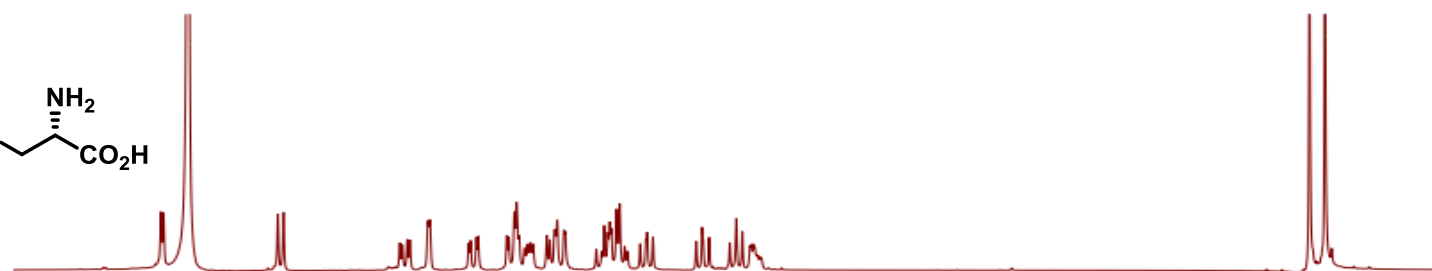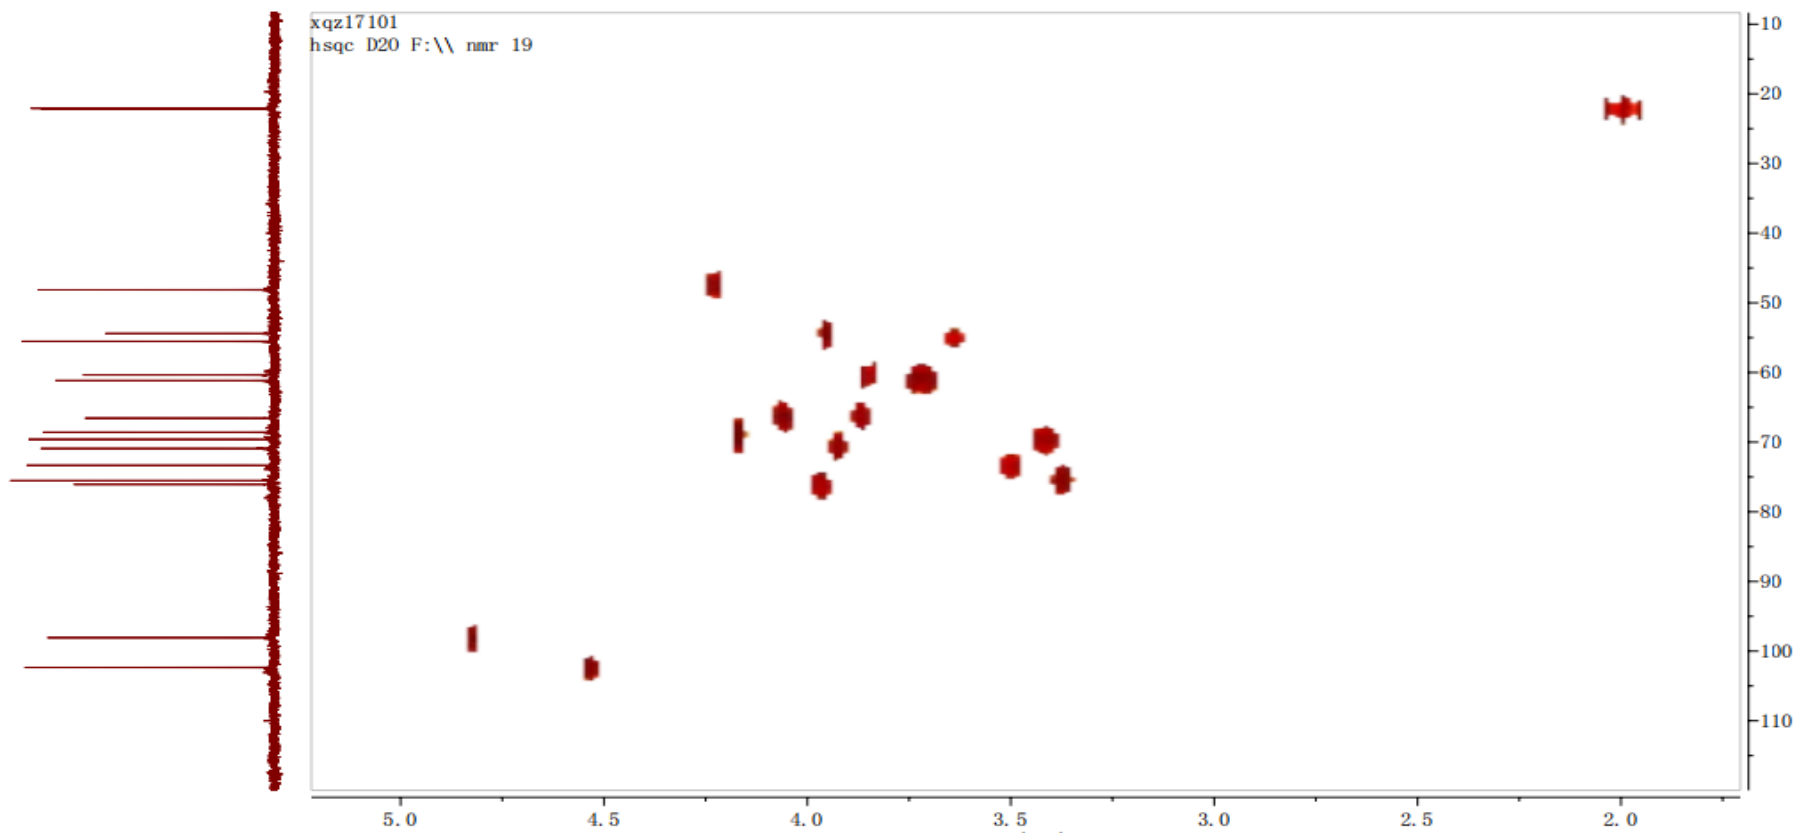

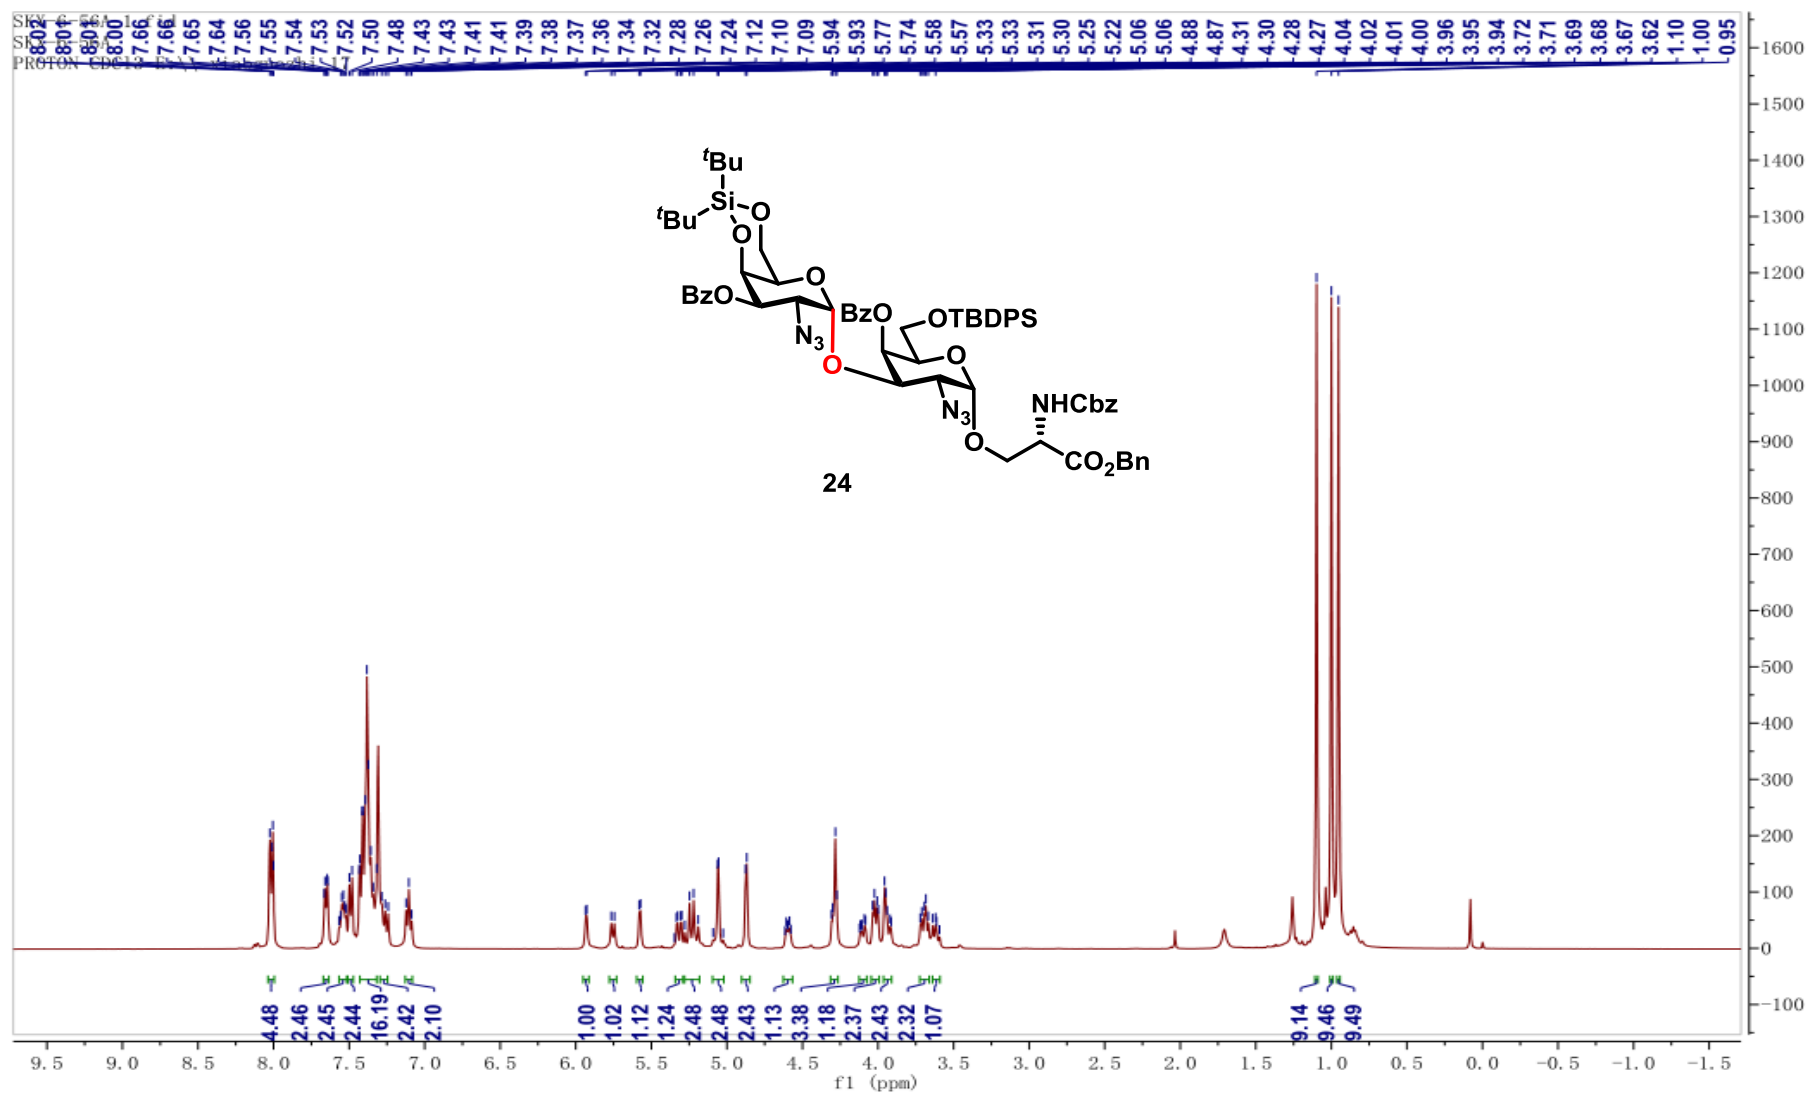

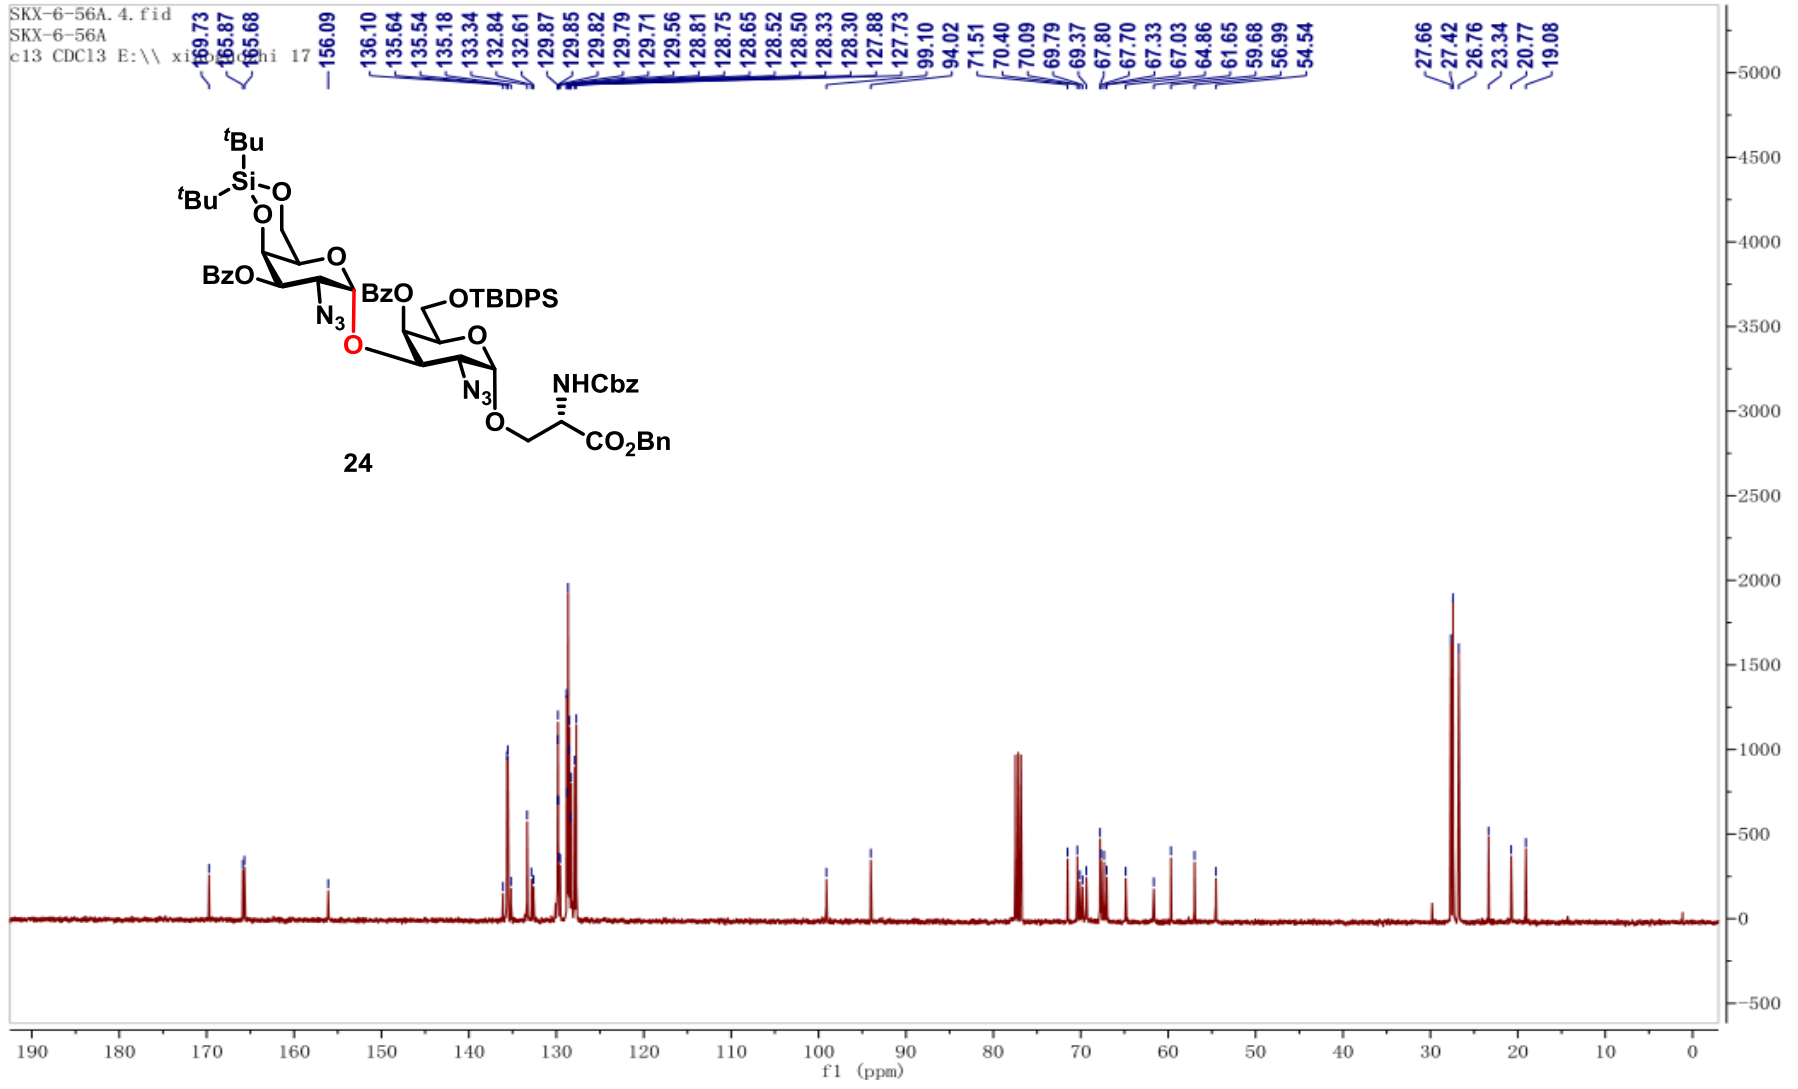

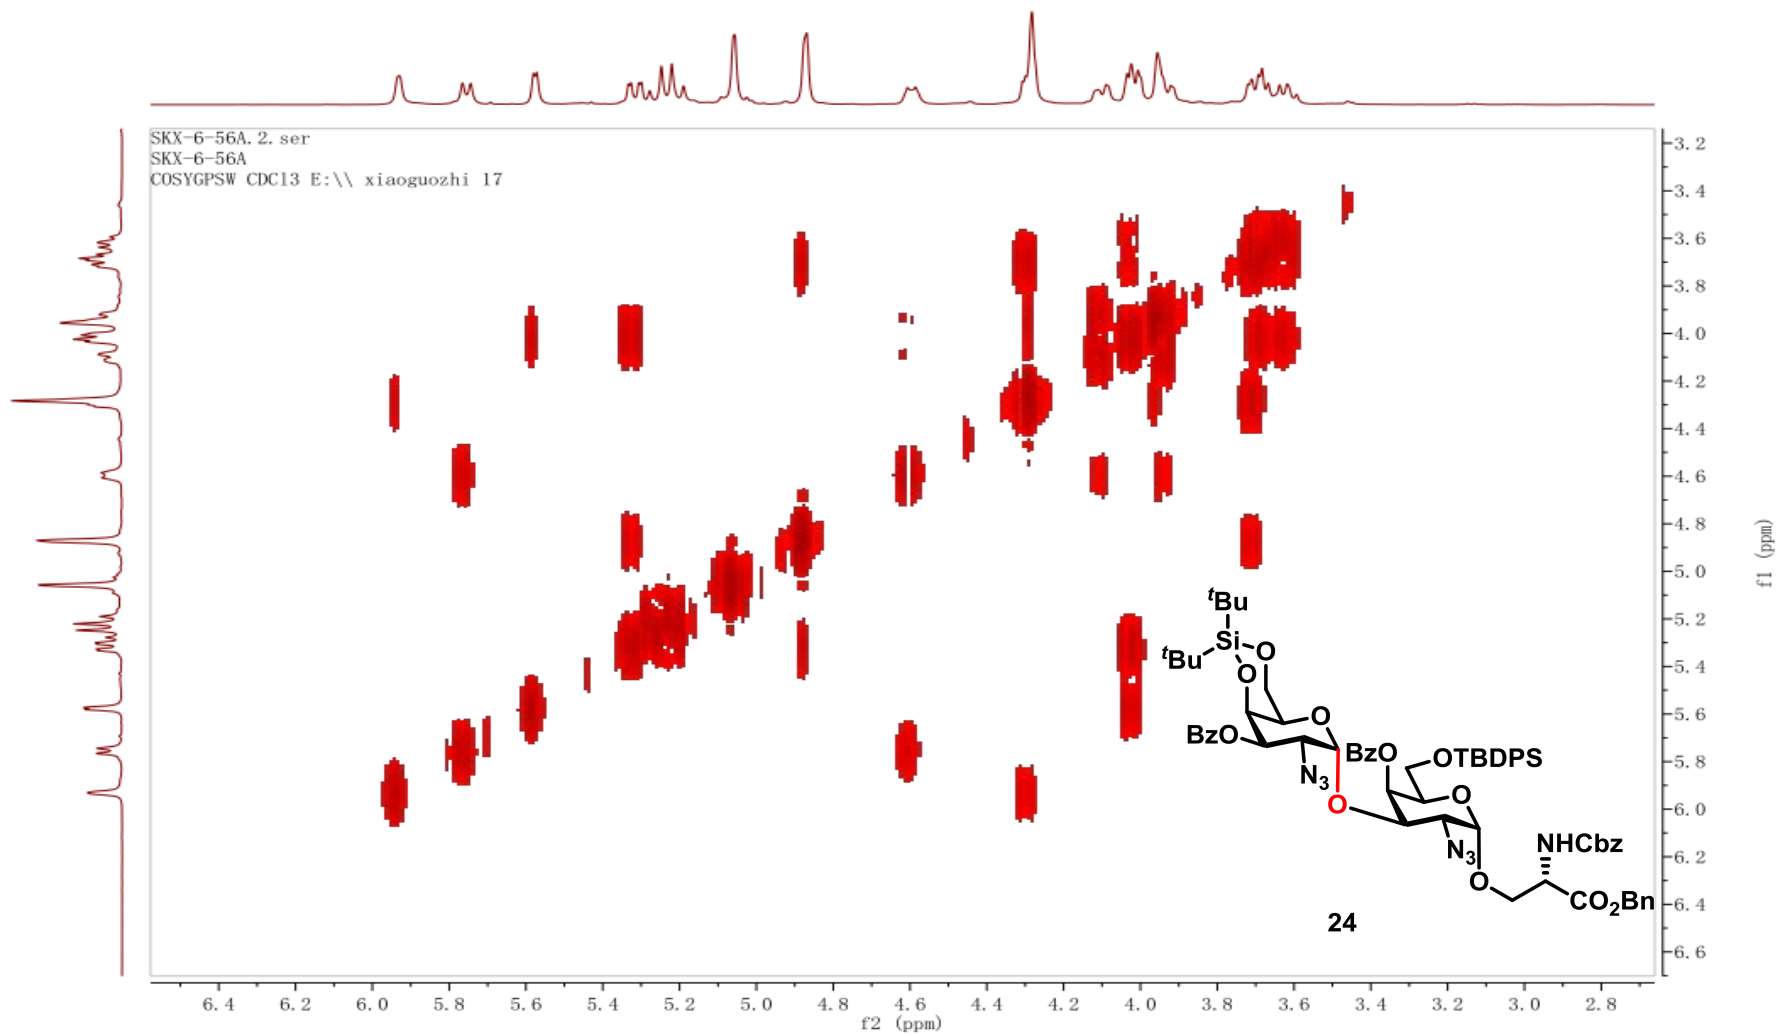

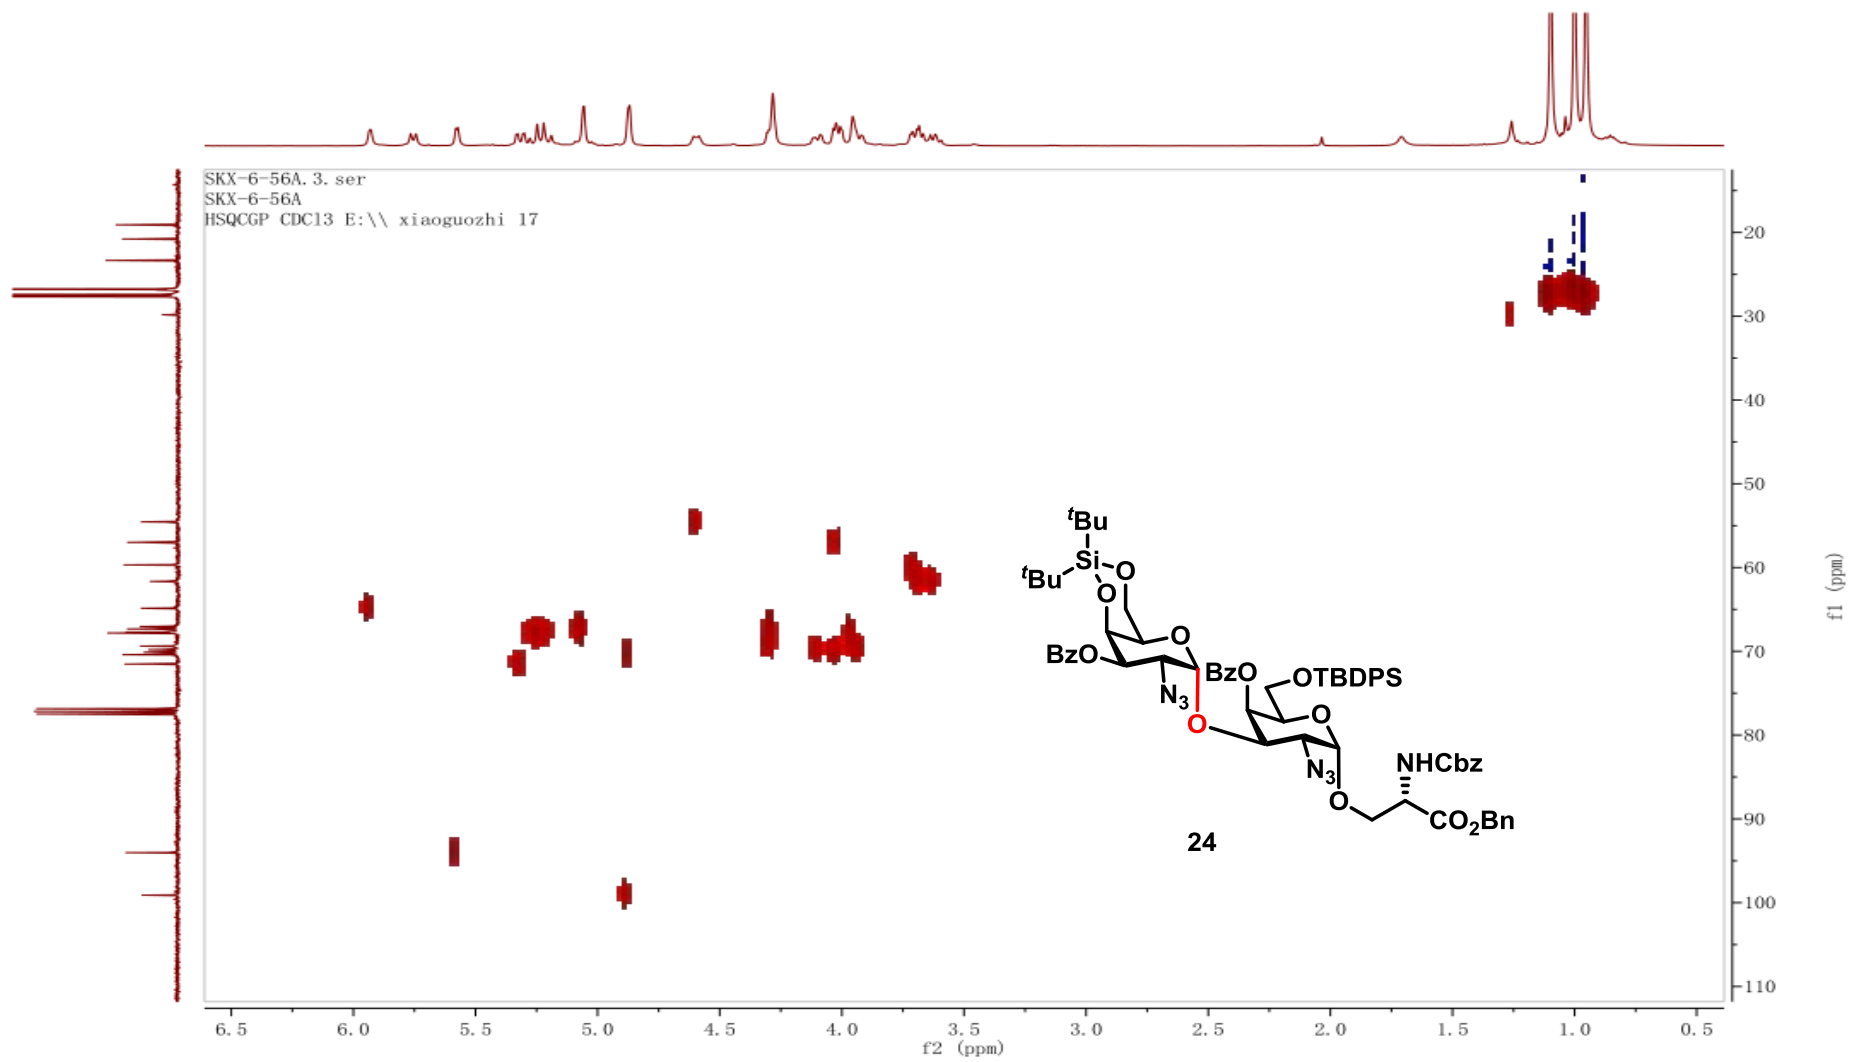

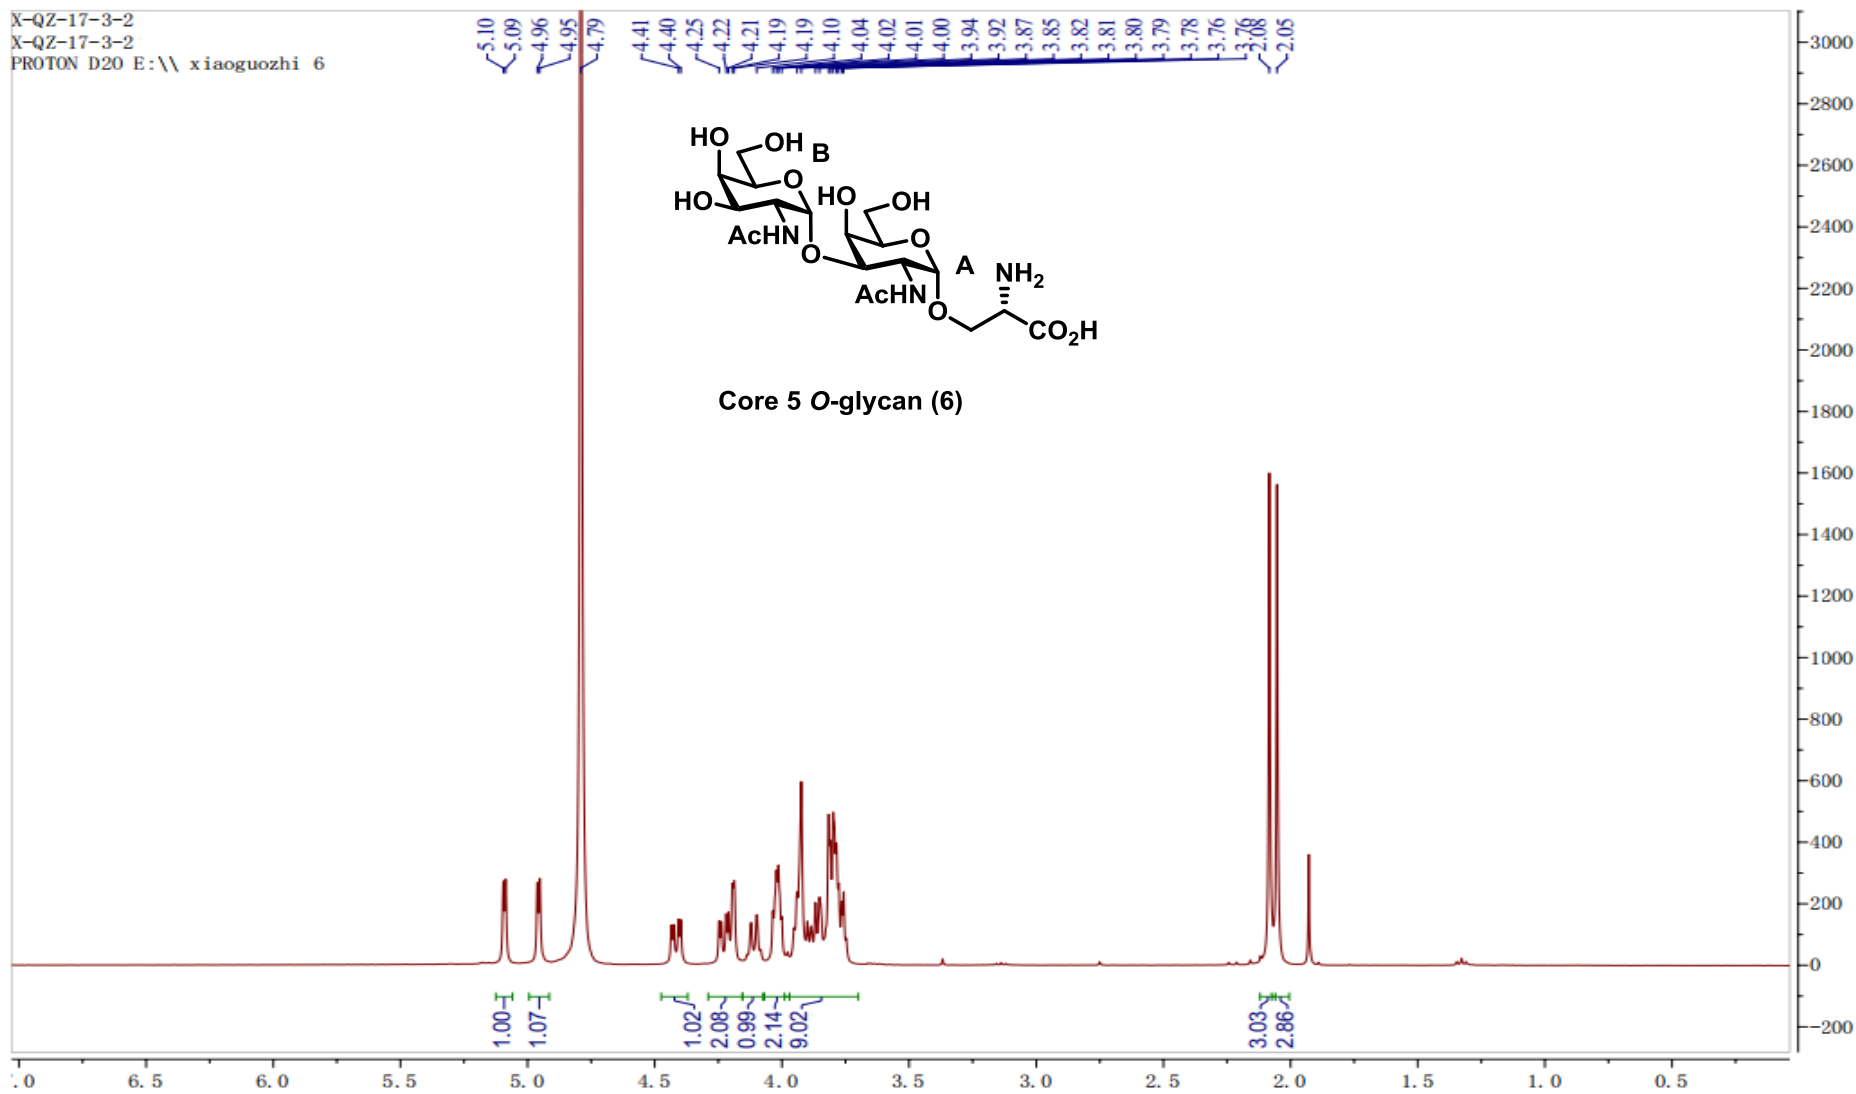



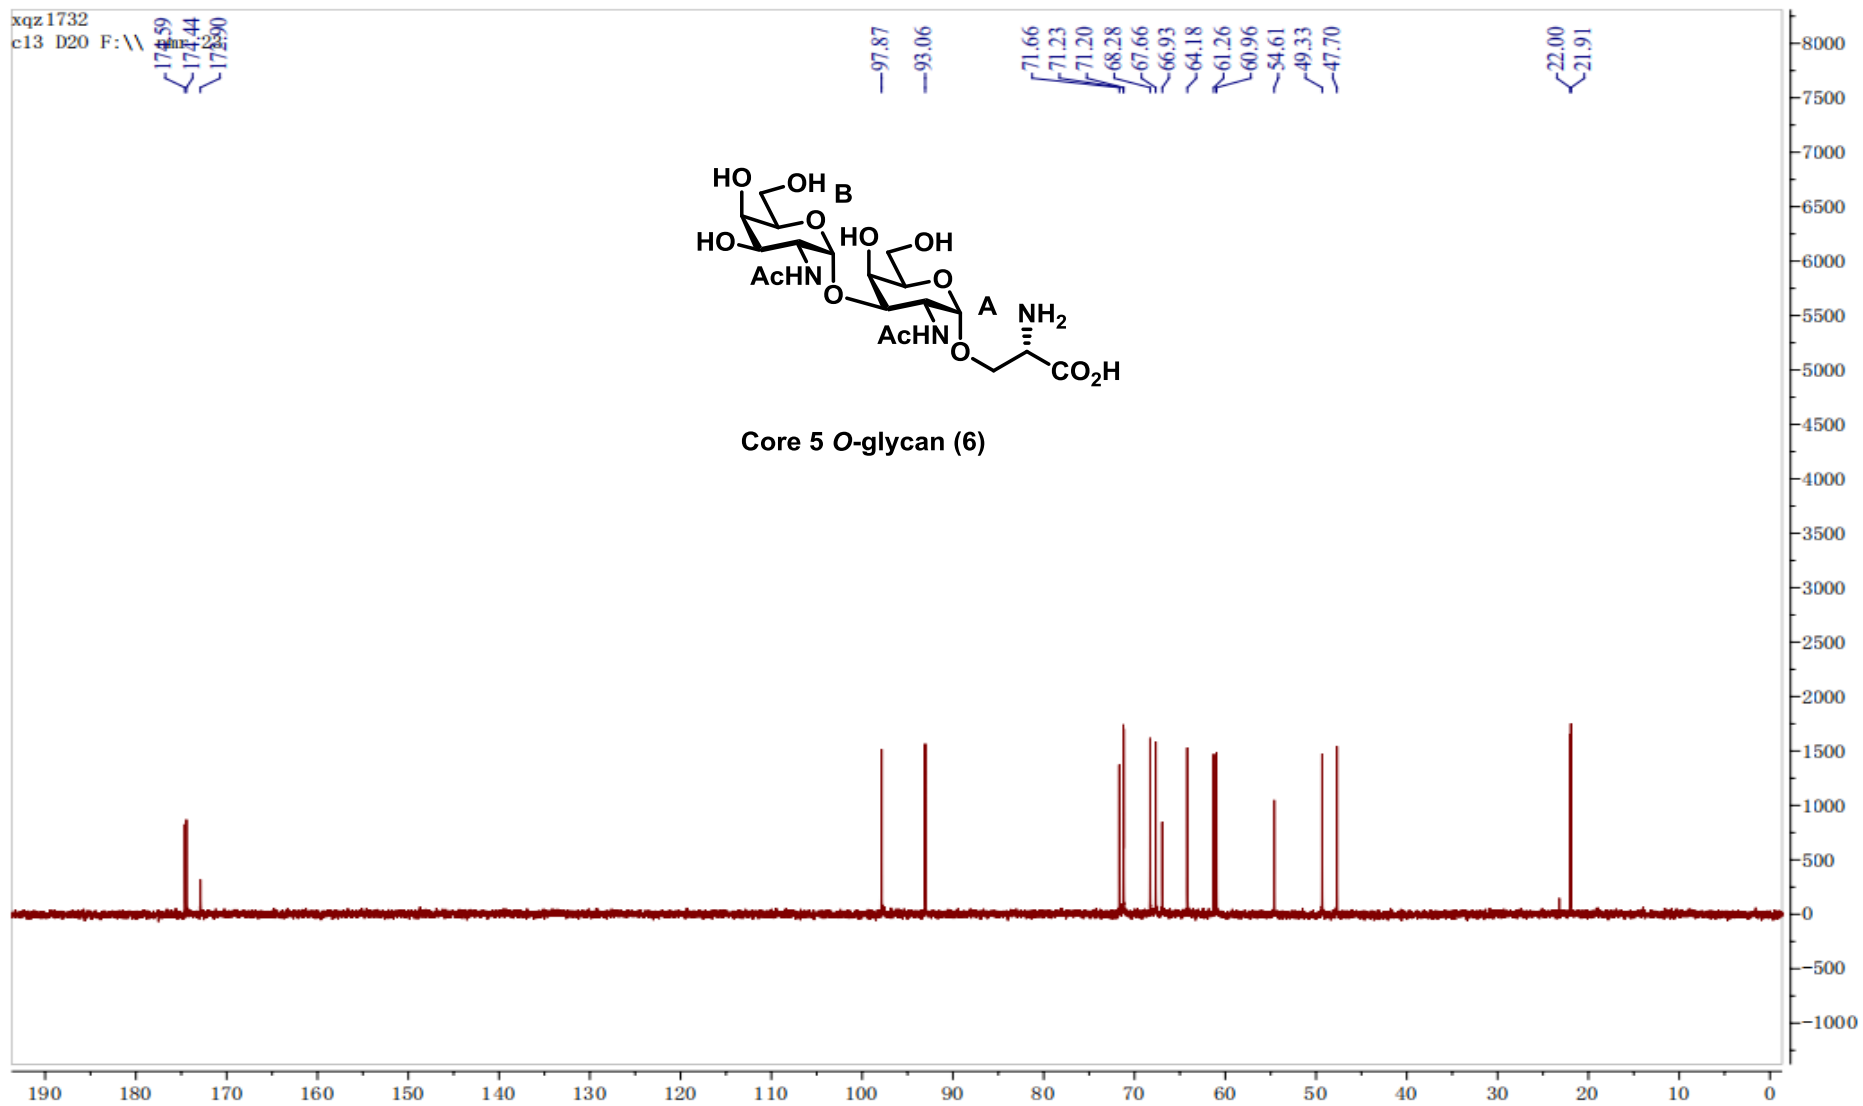

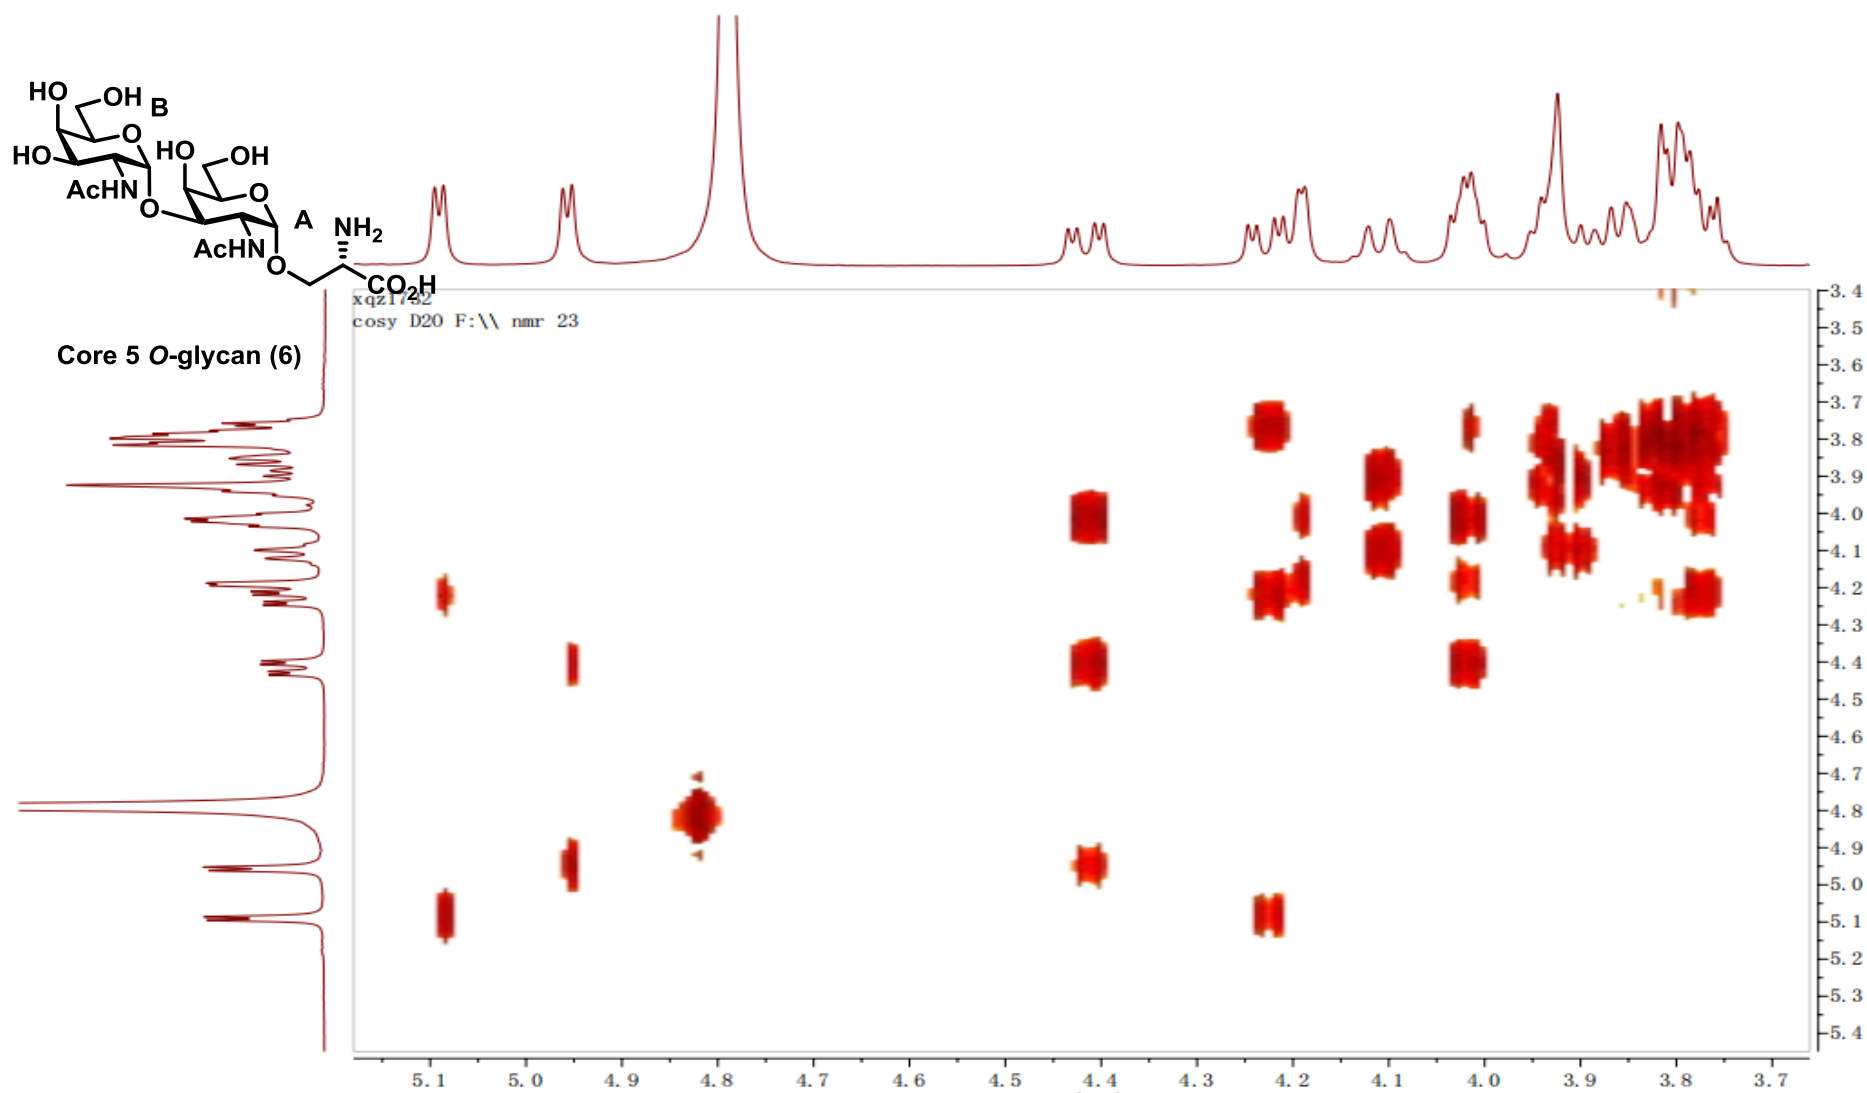

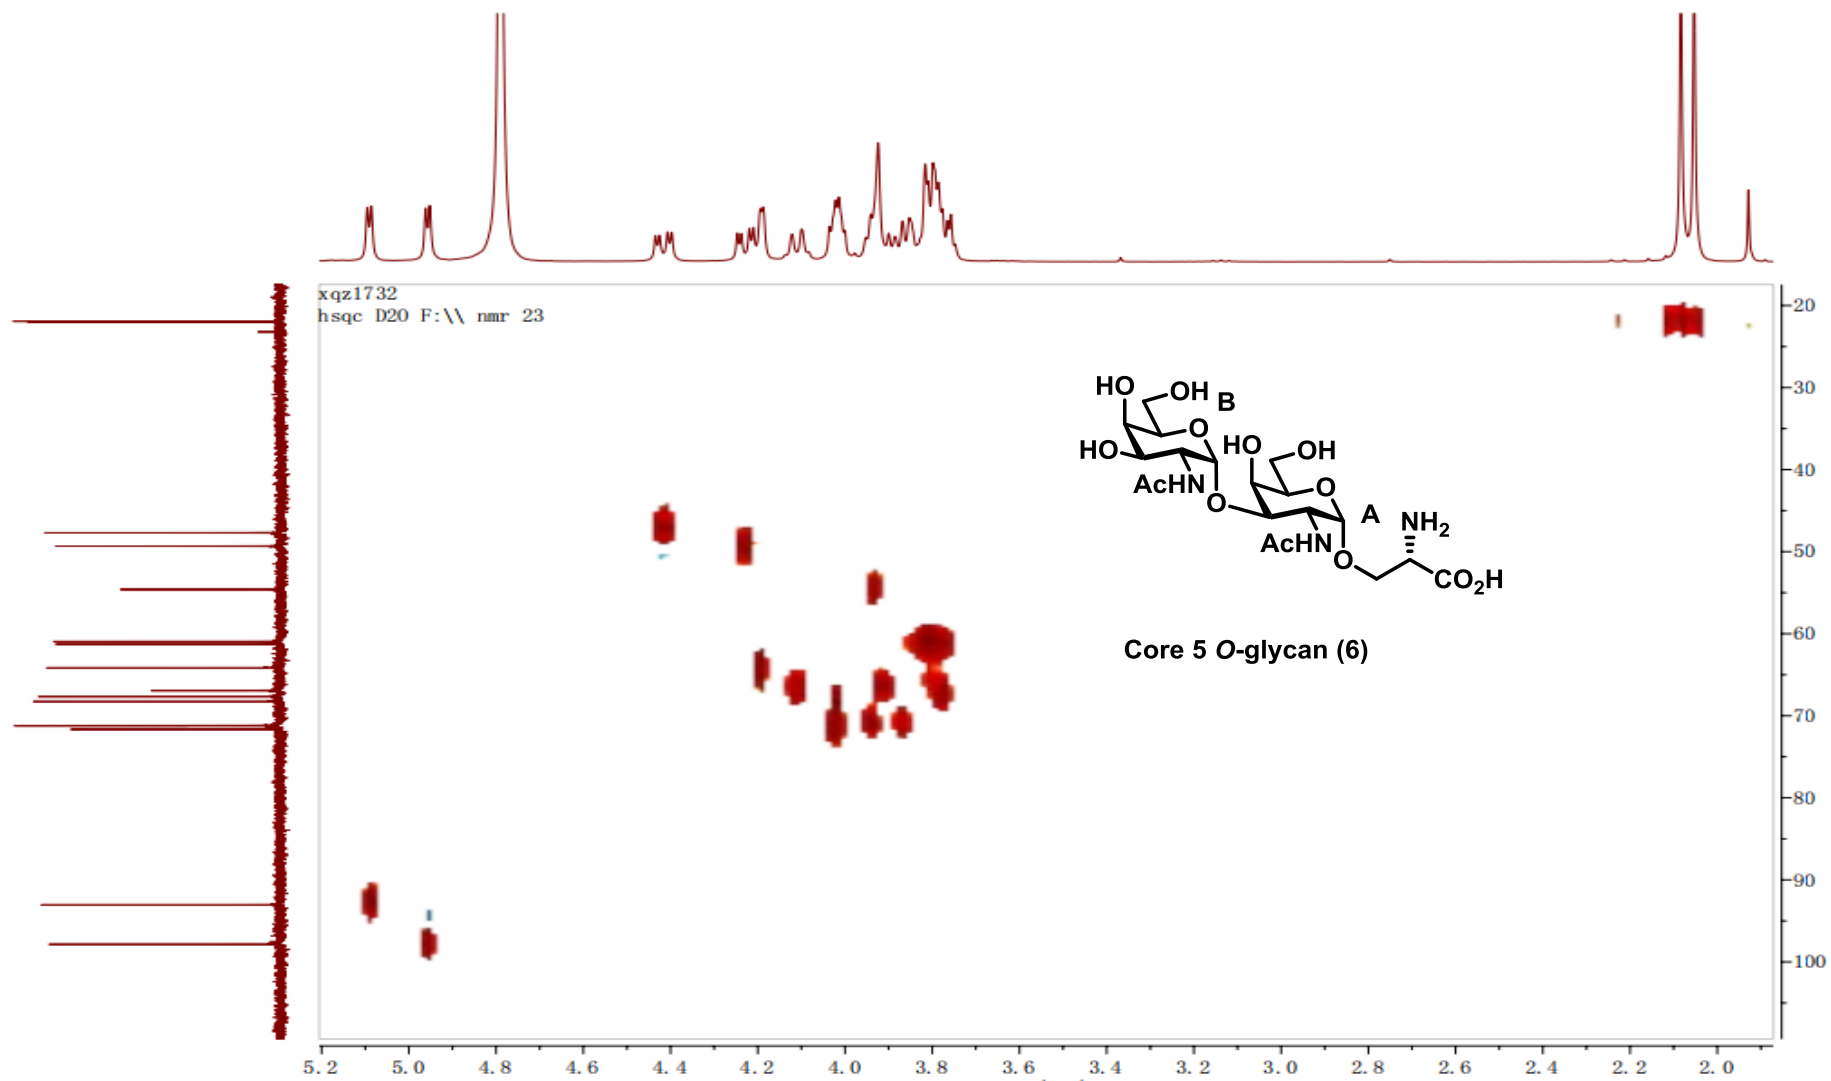

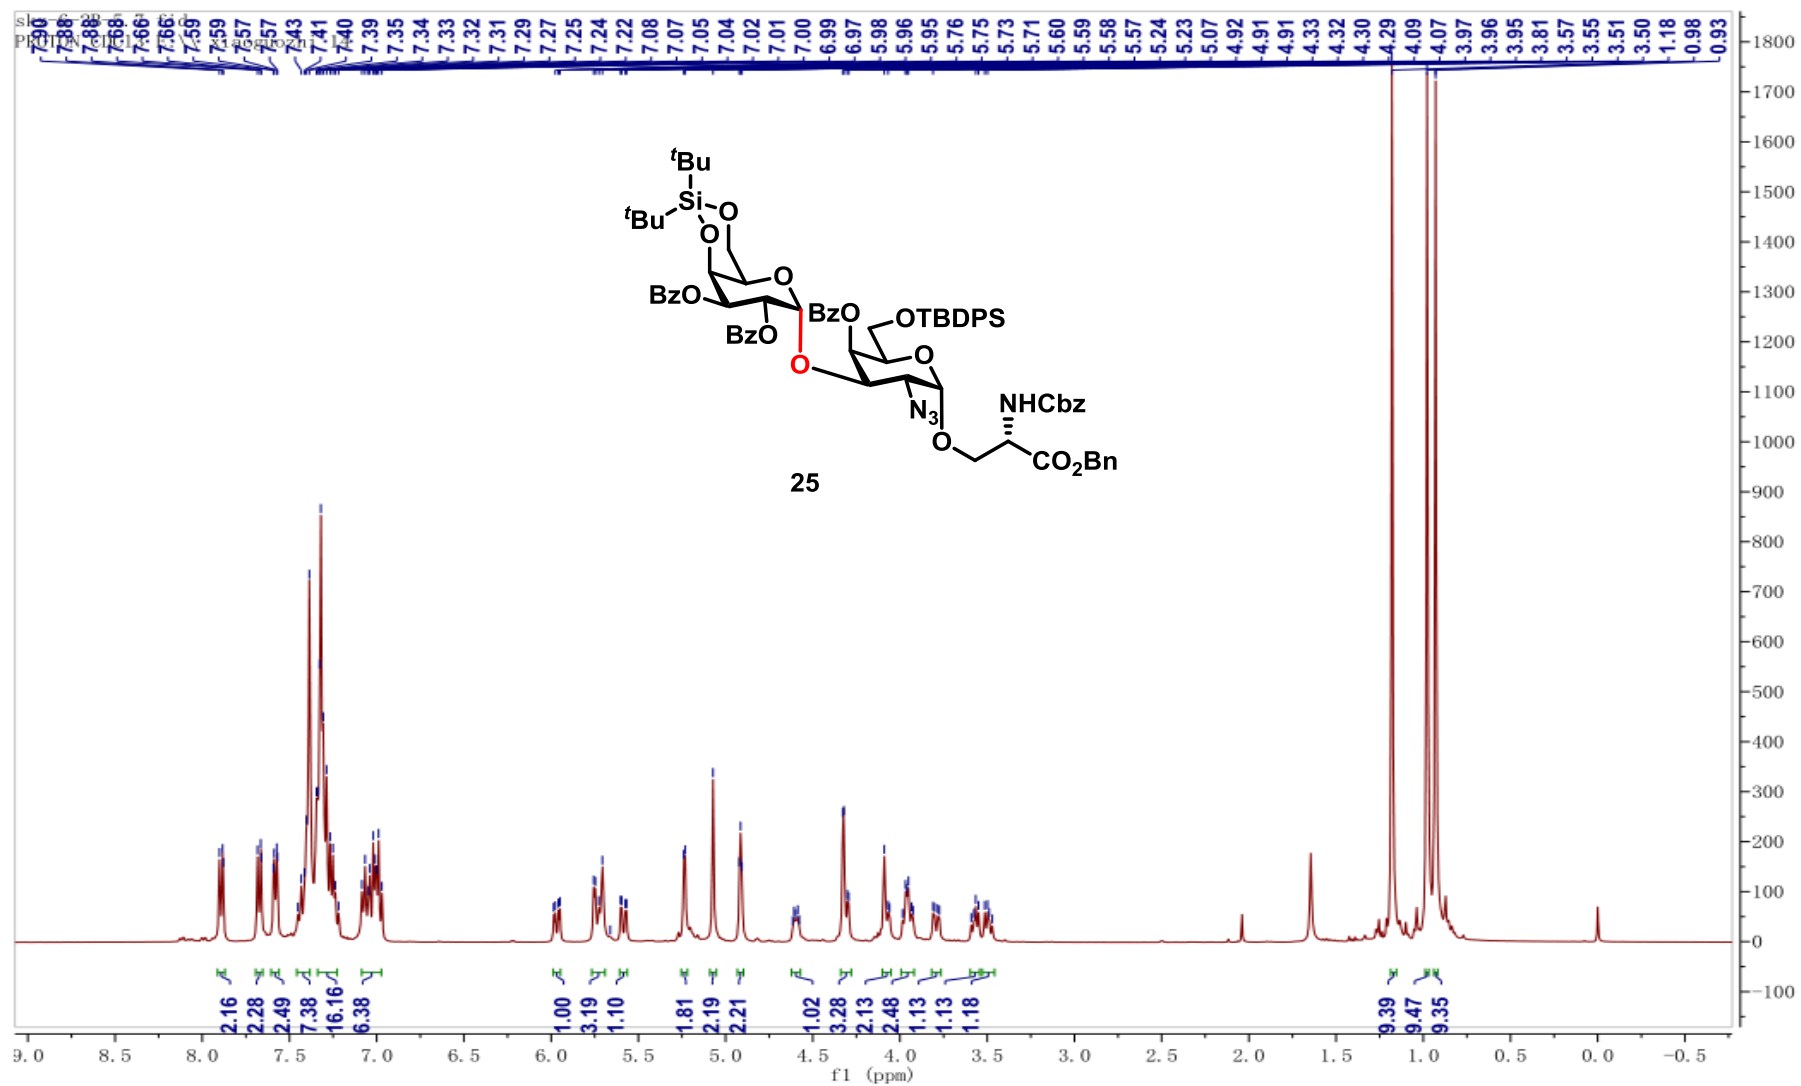

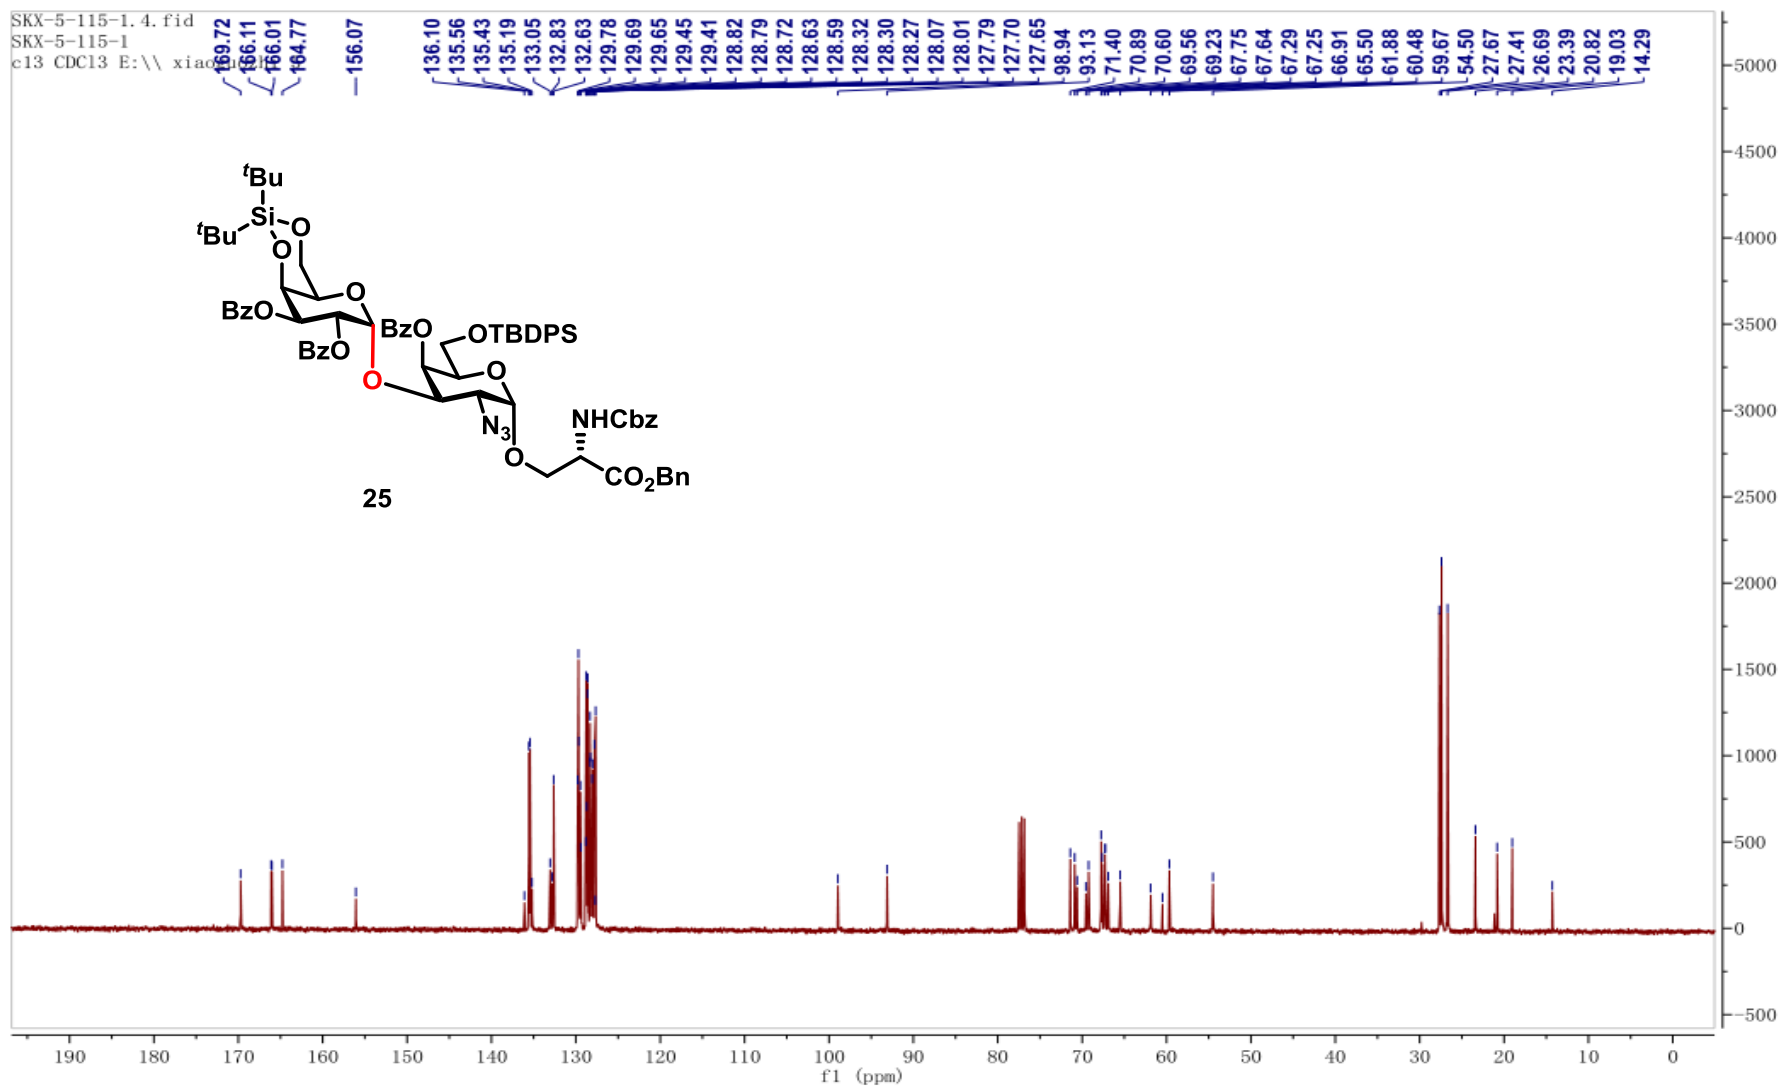

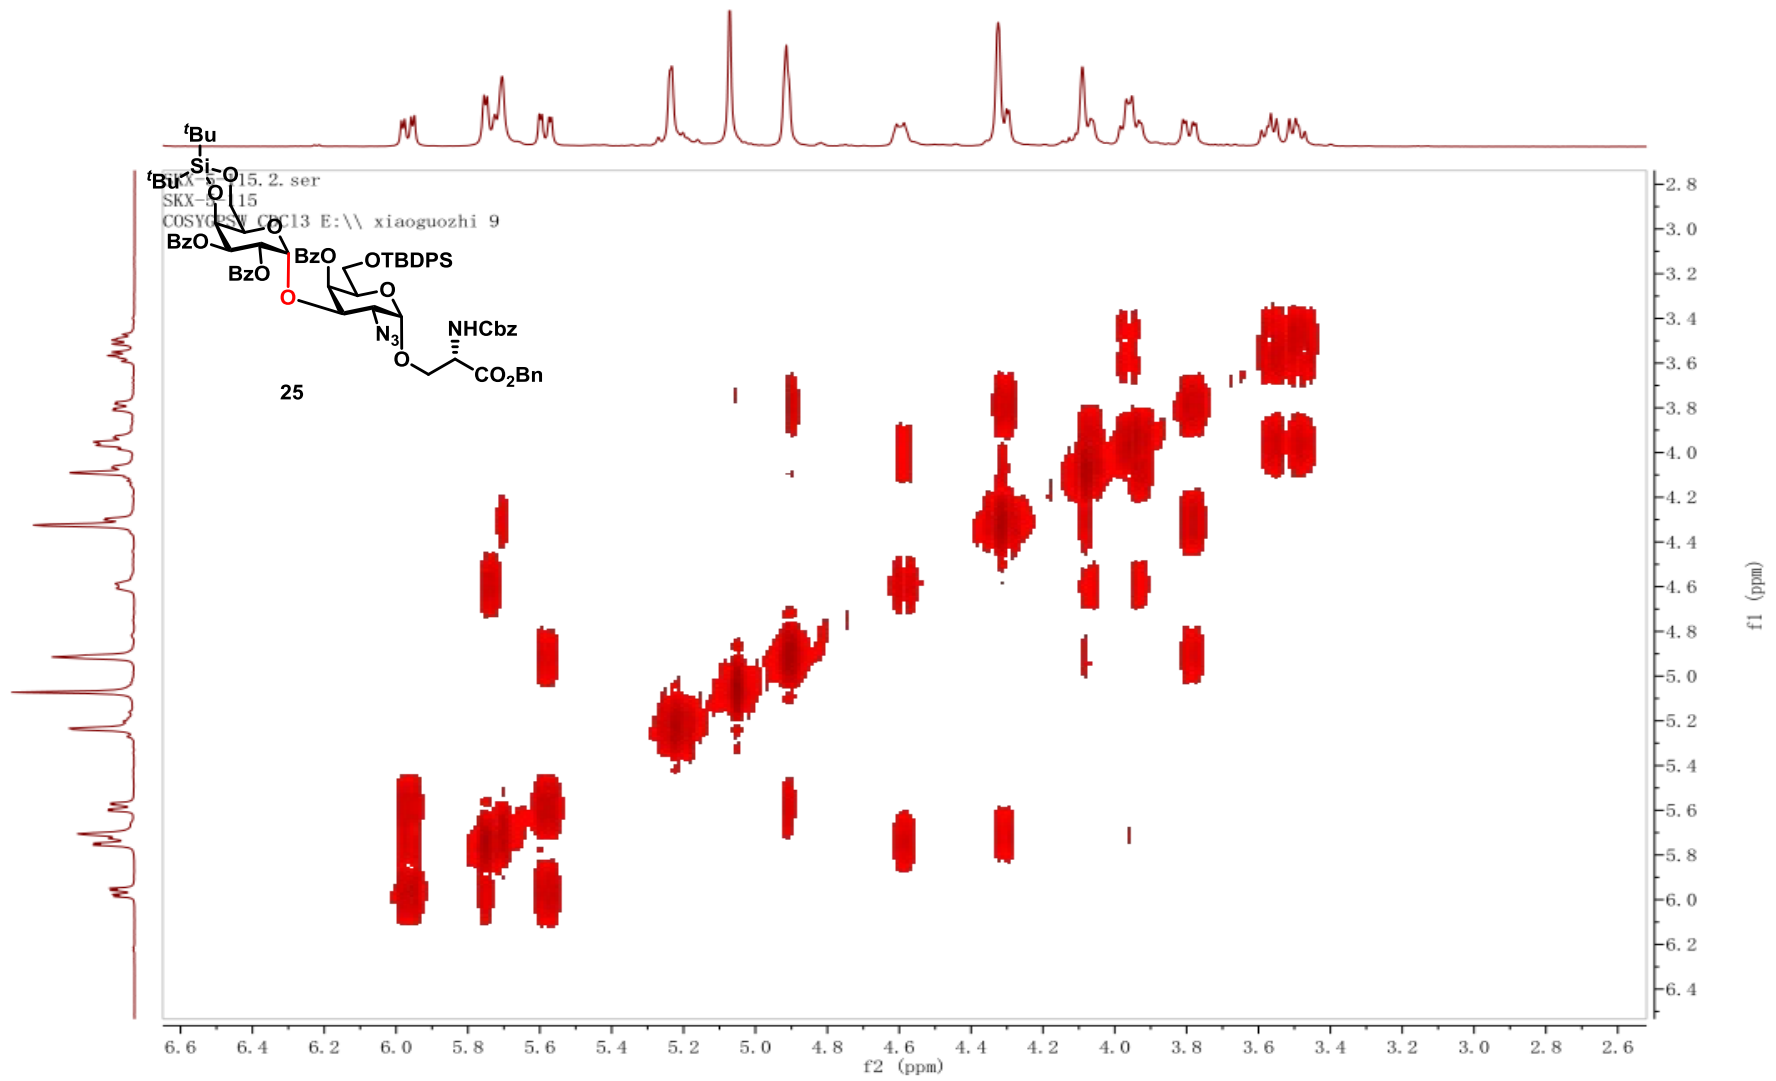

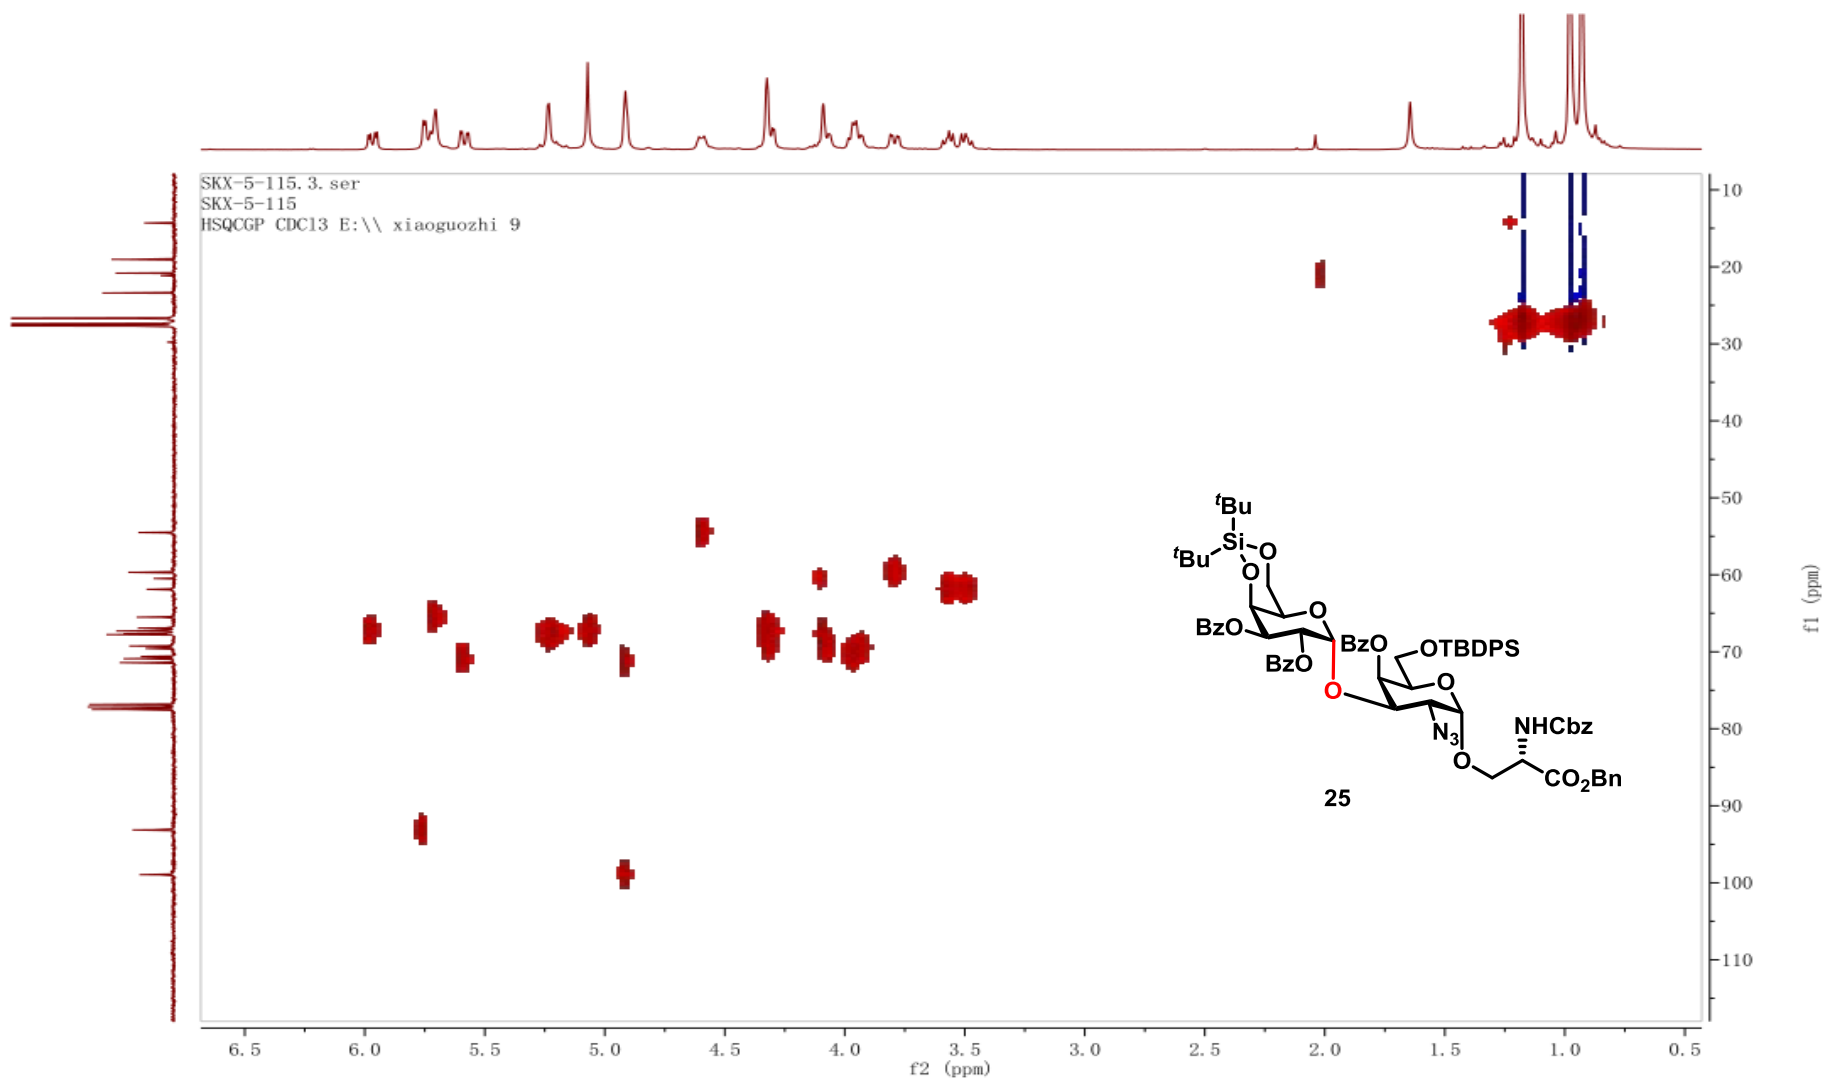

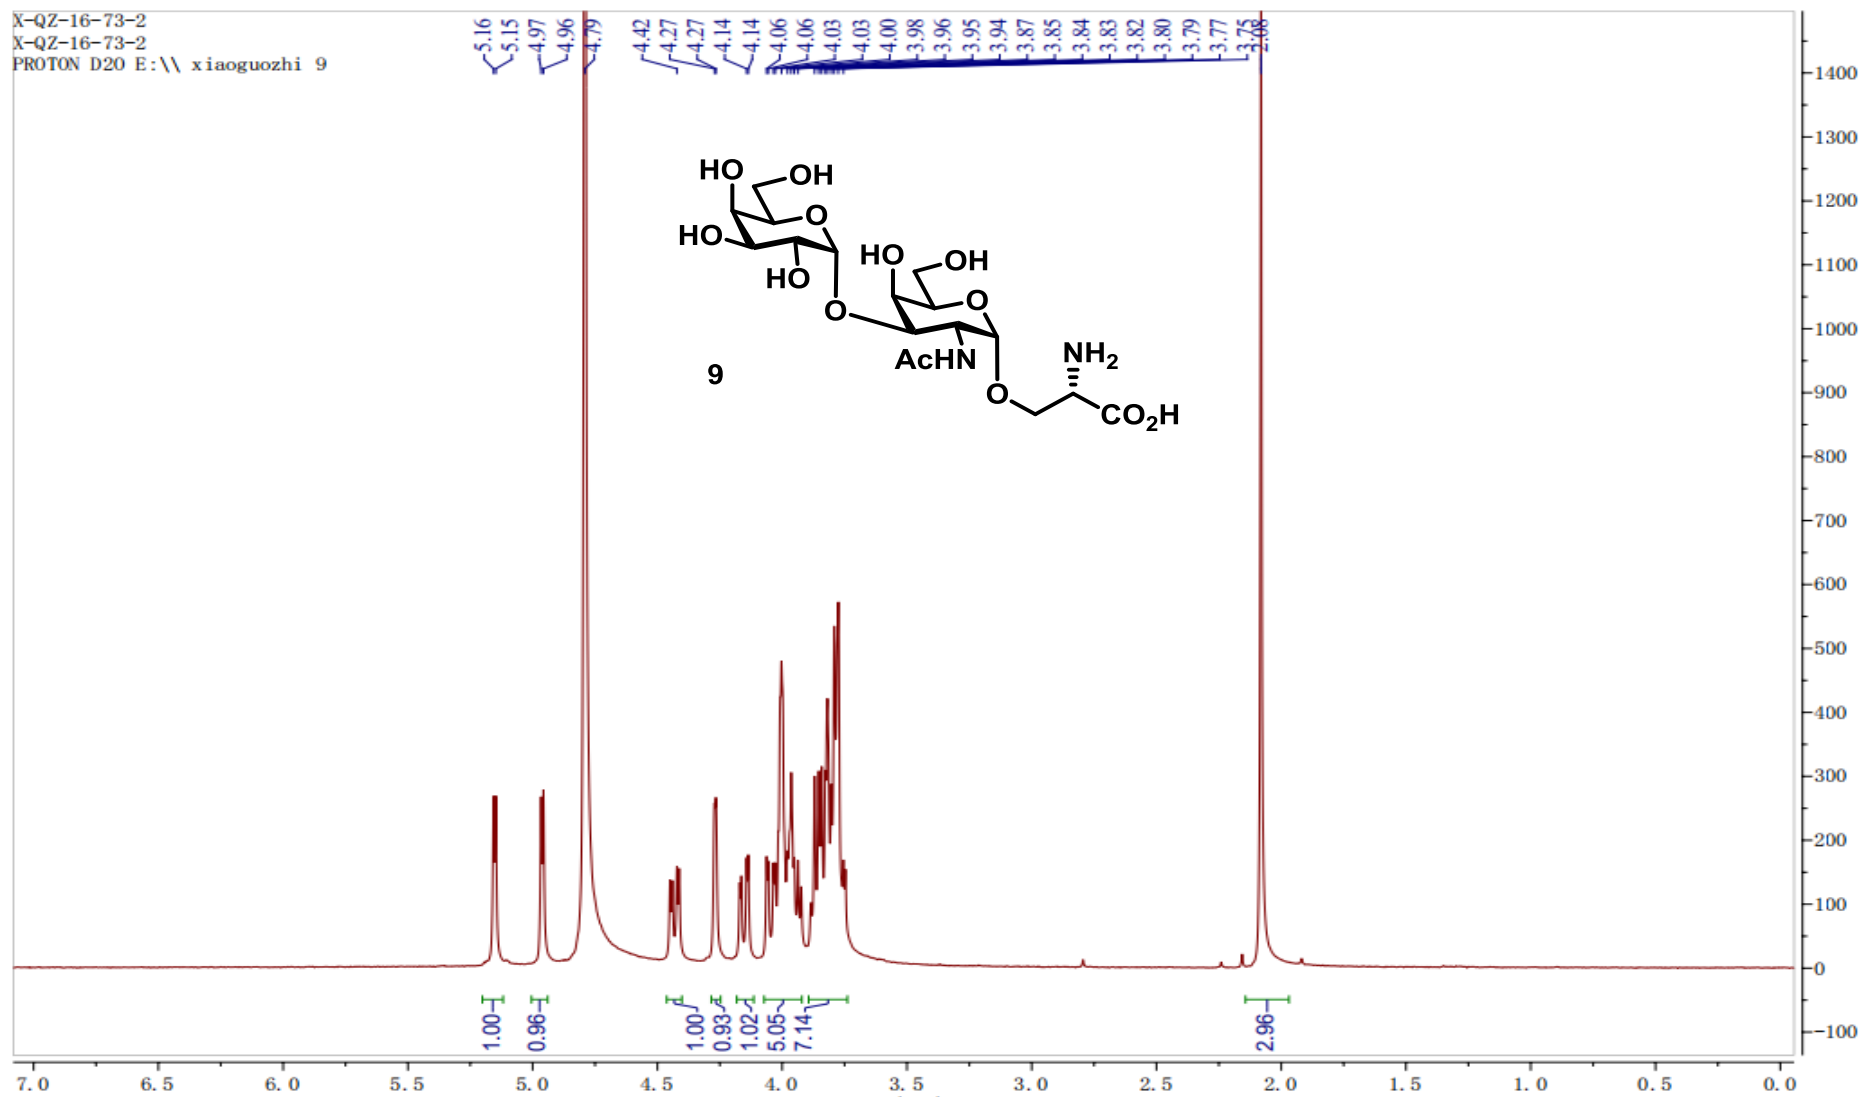



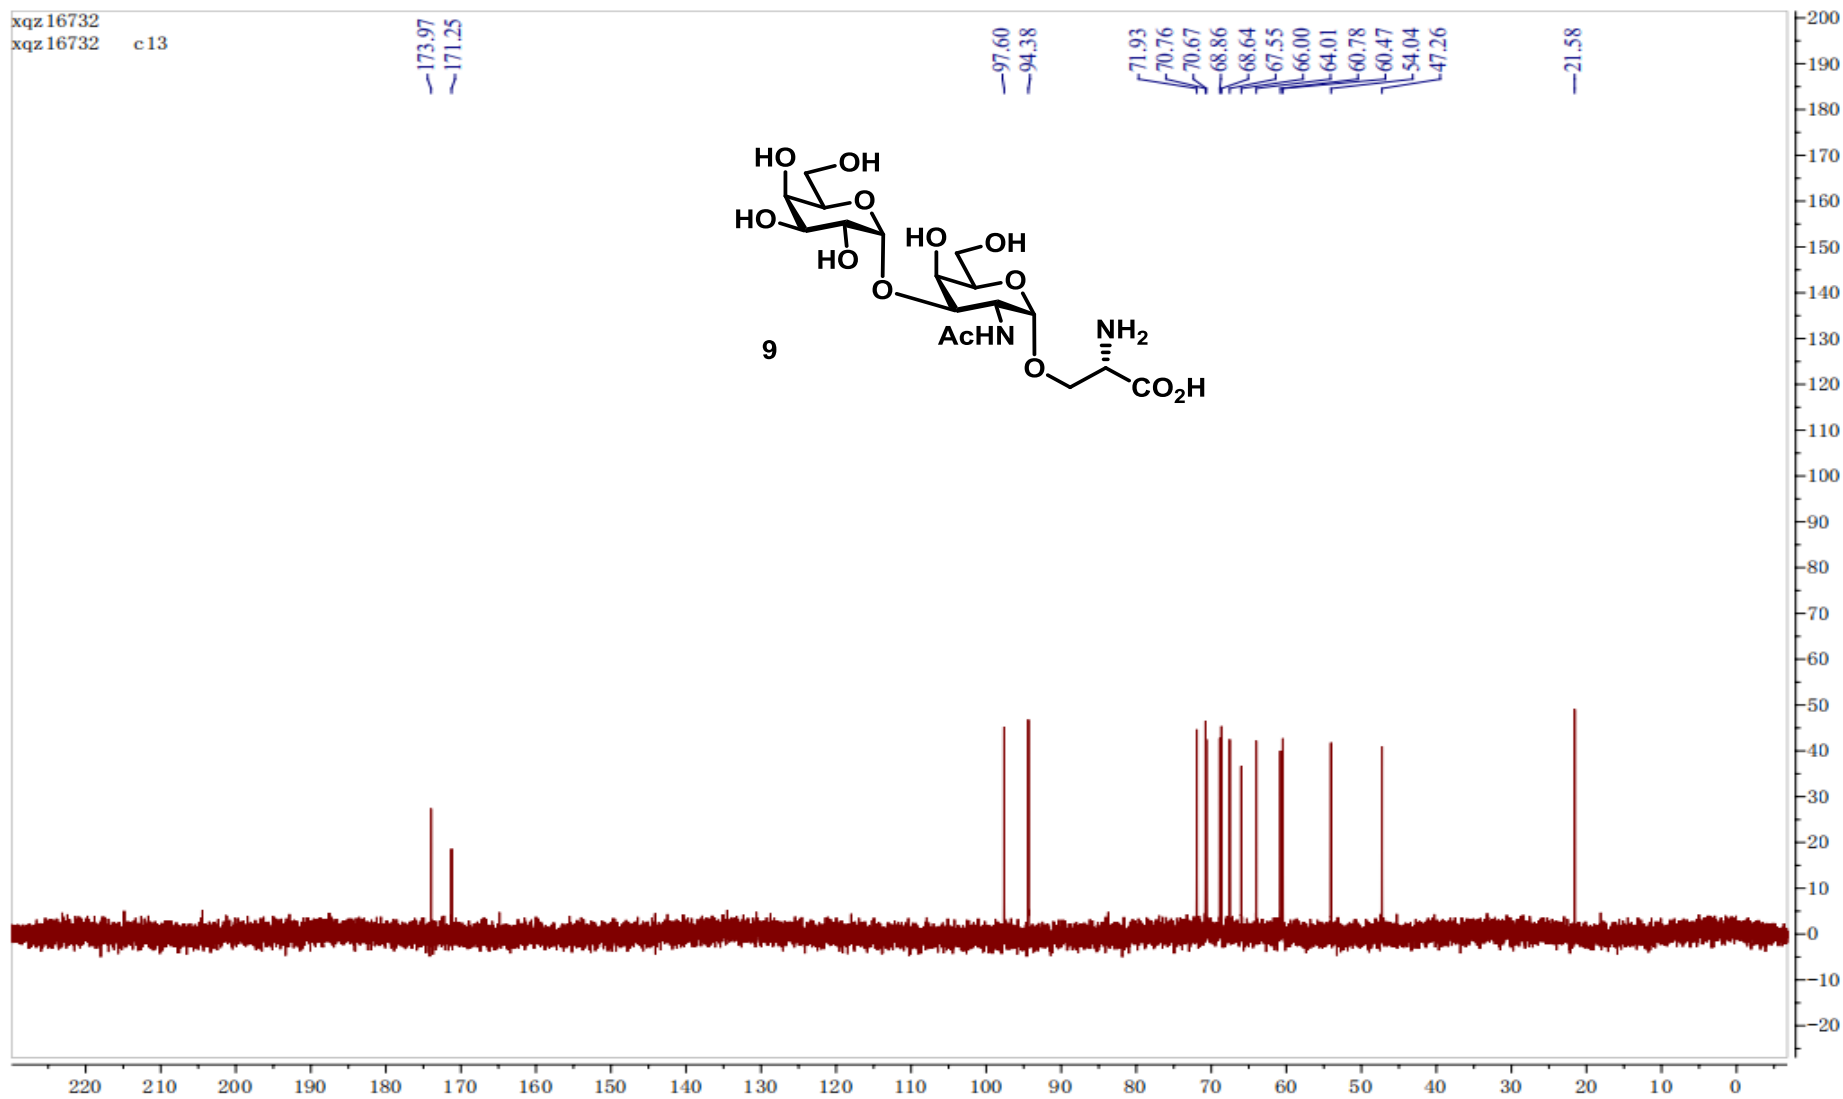

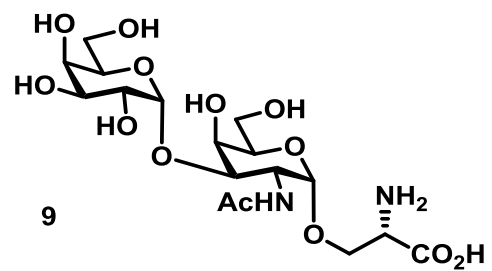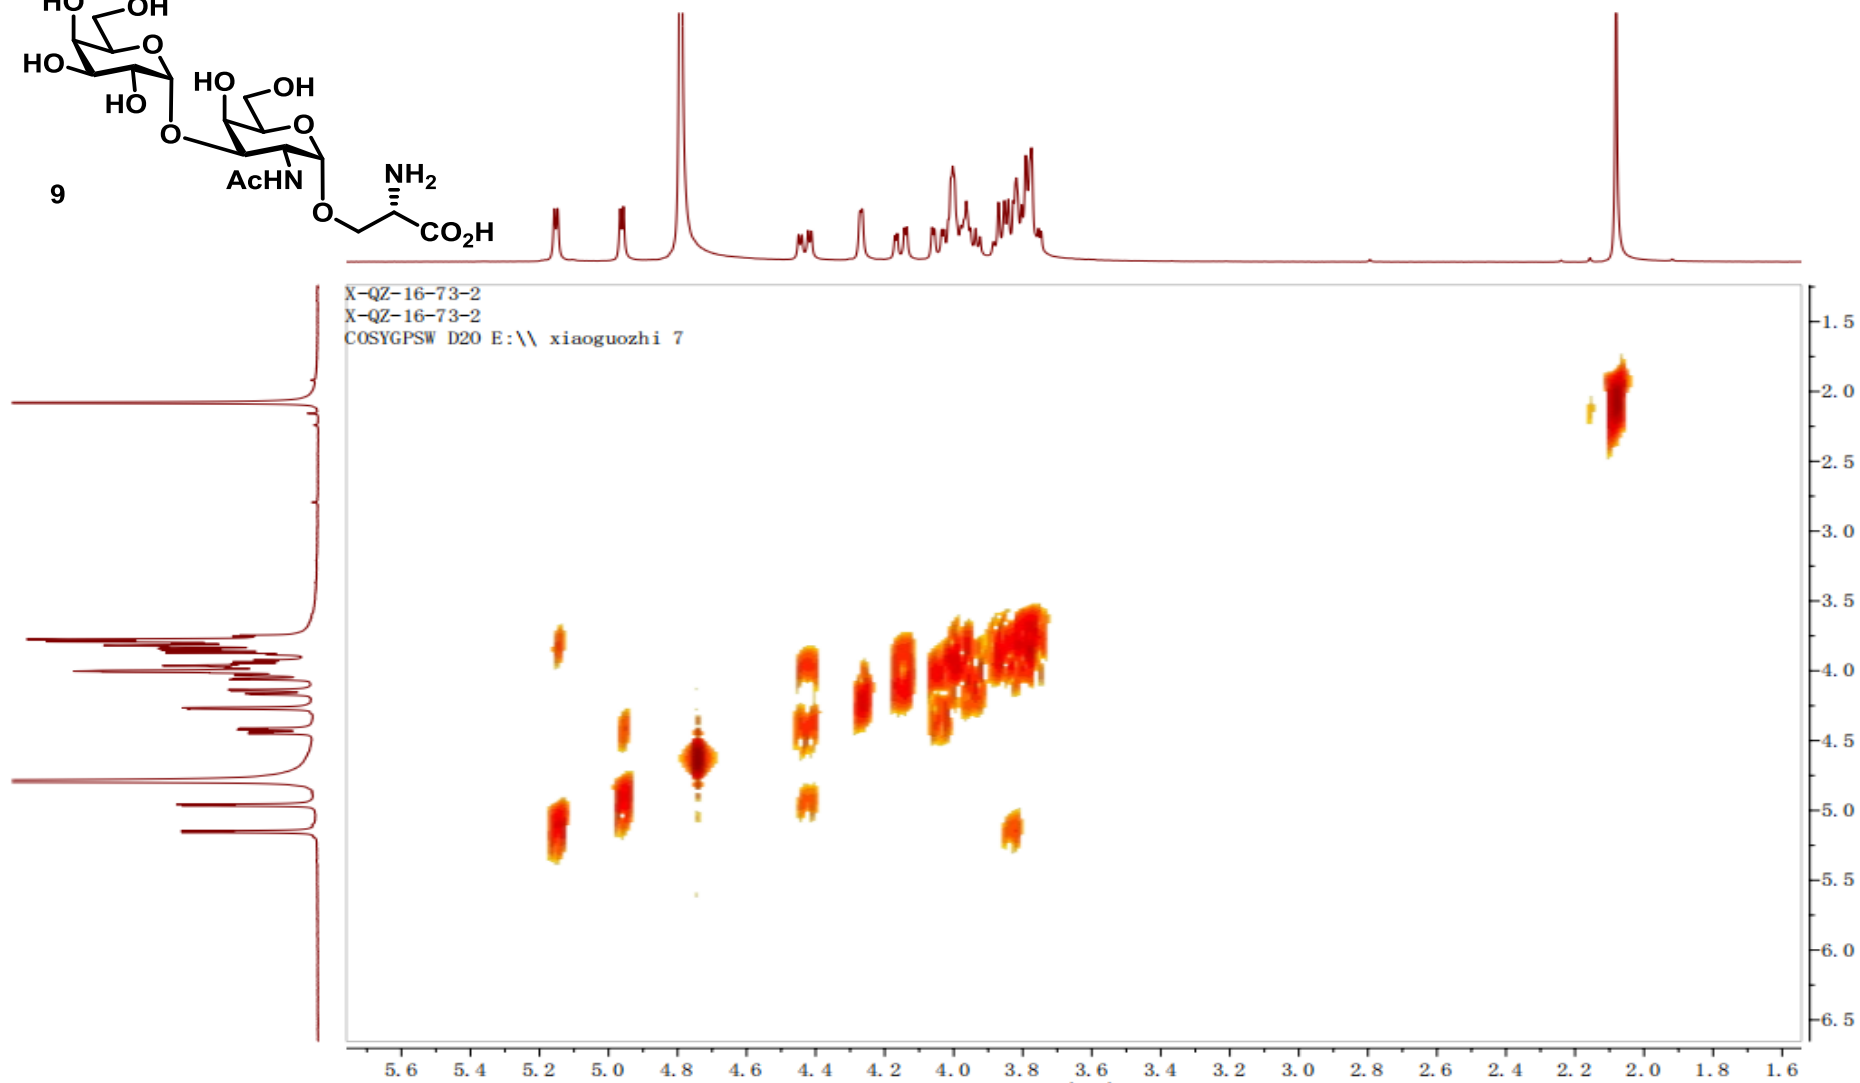

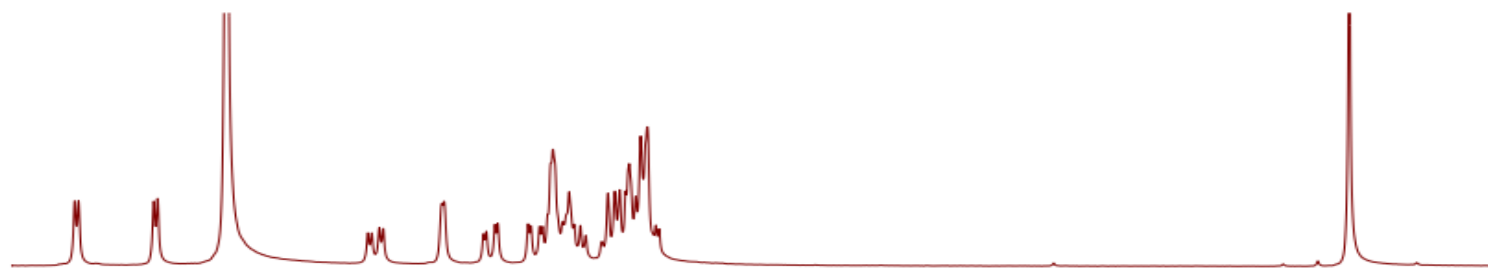

xqz16732

xqz16732 hsqc

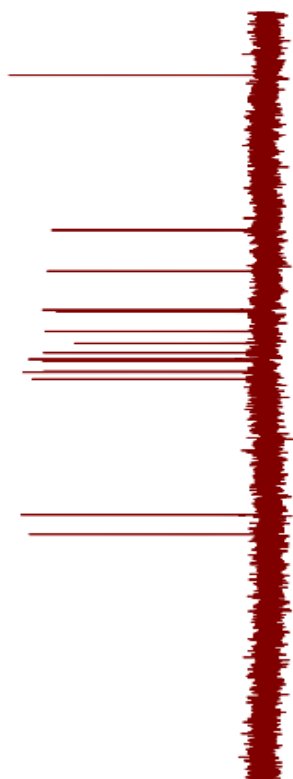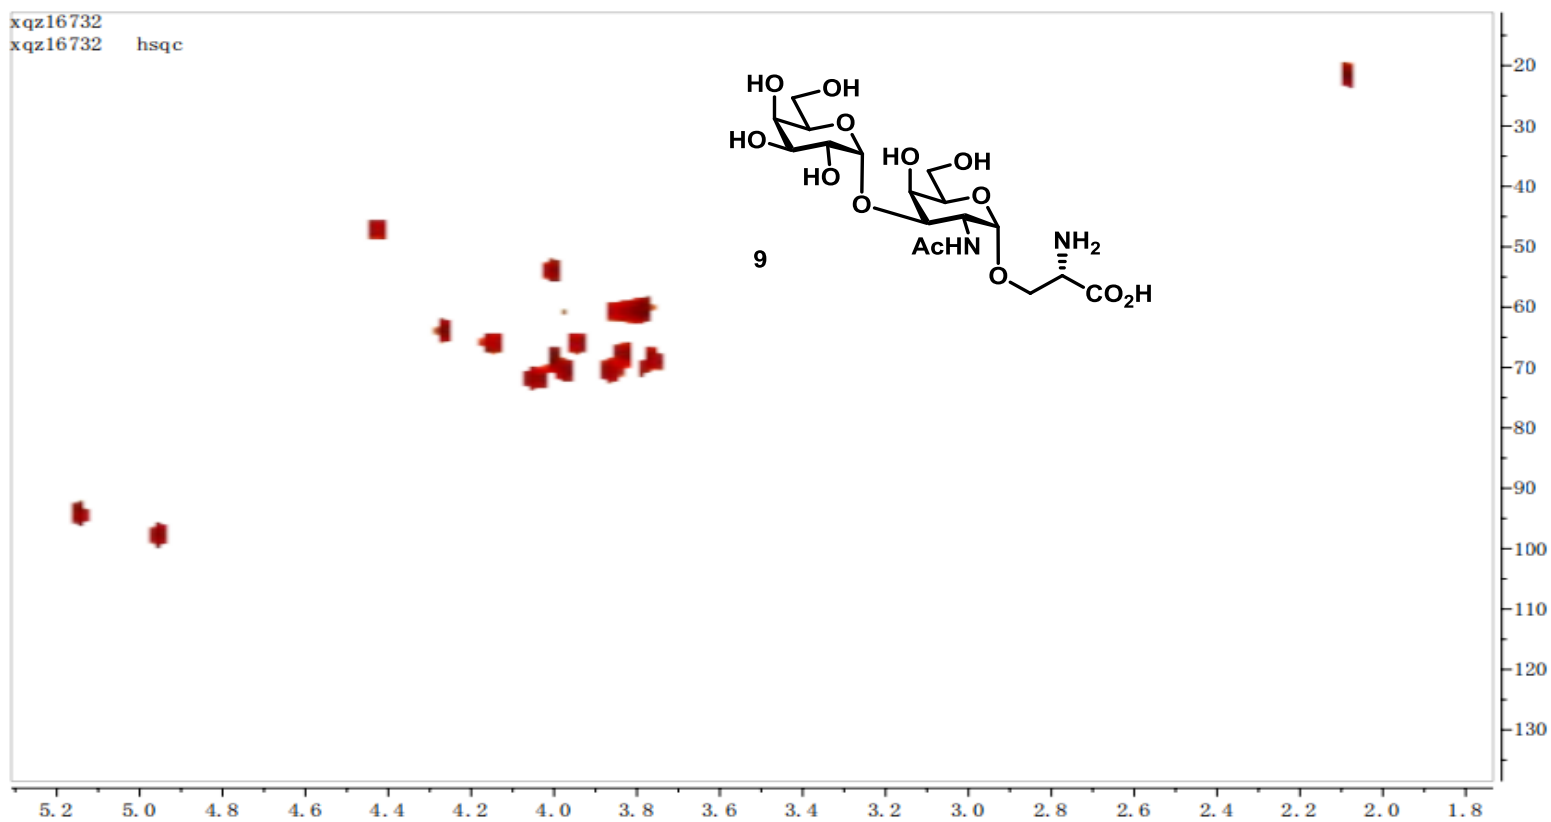

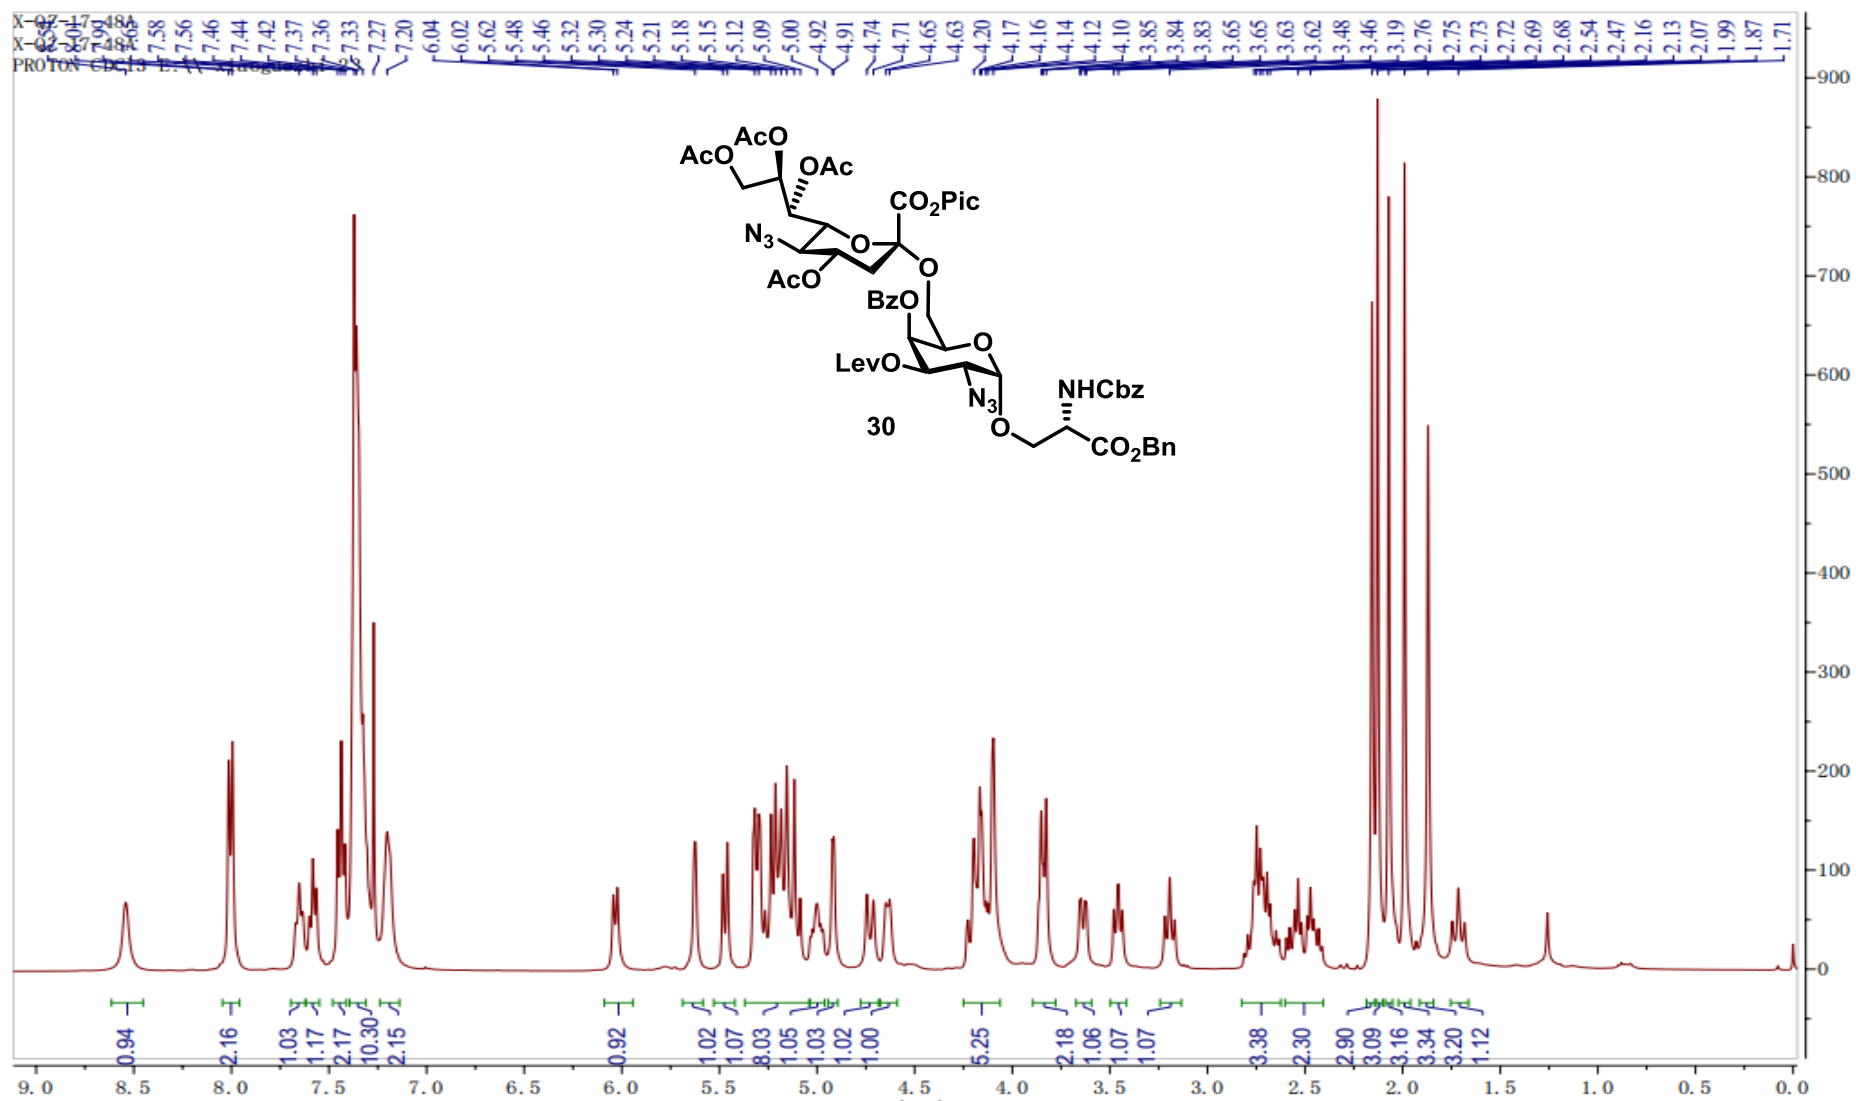

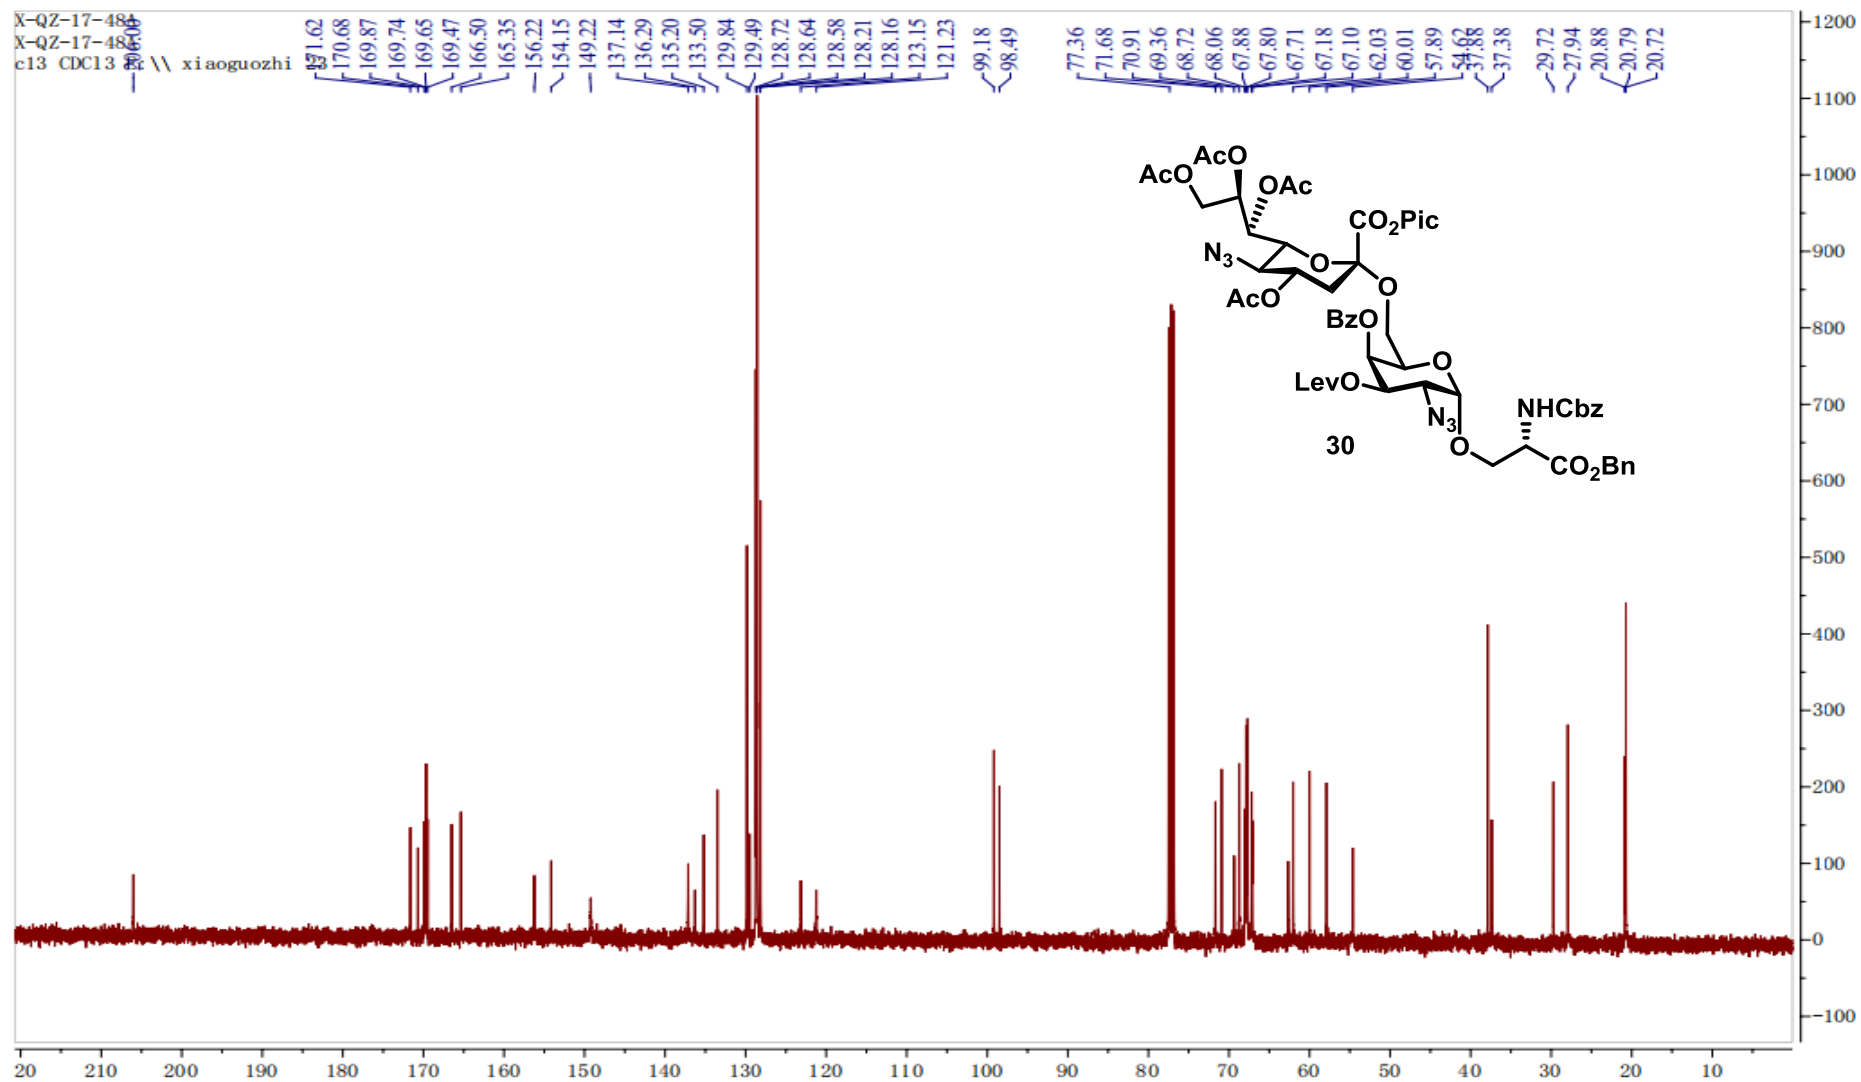

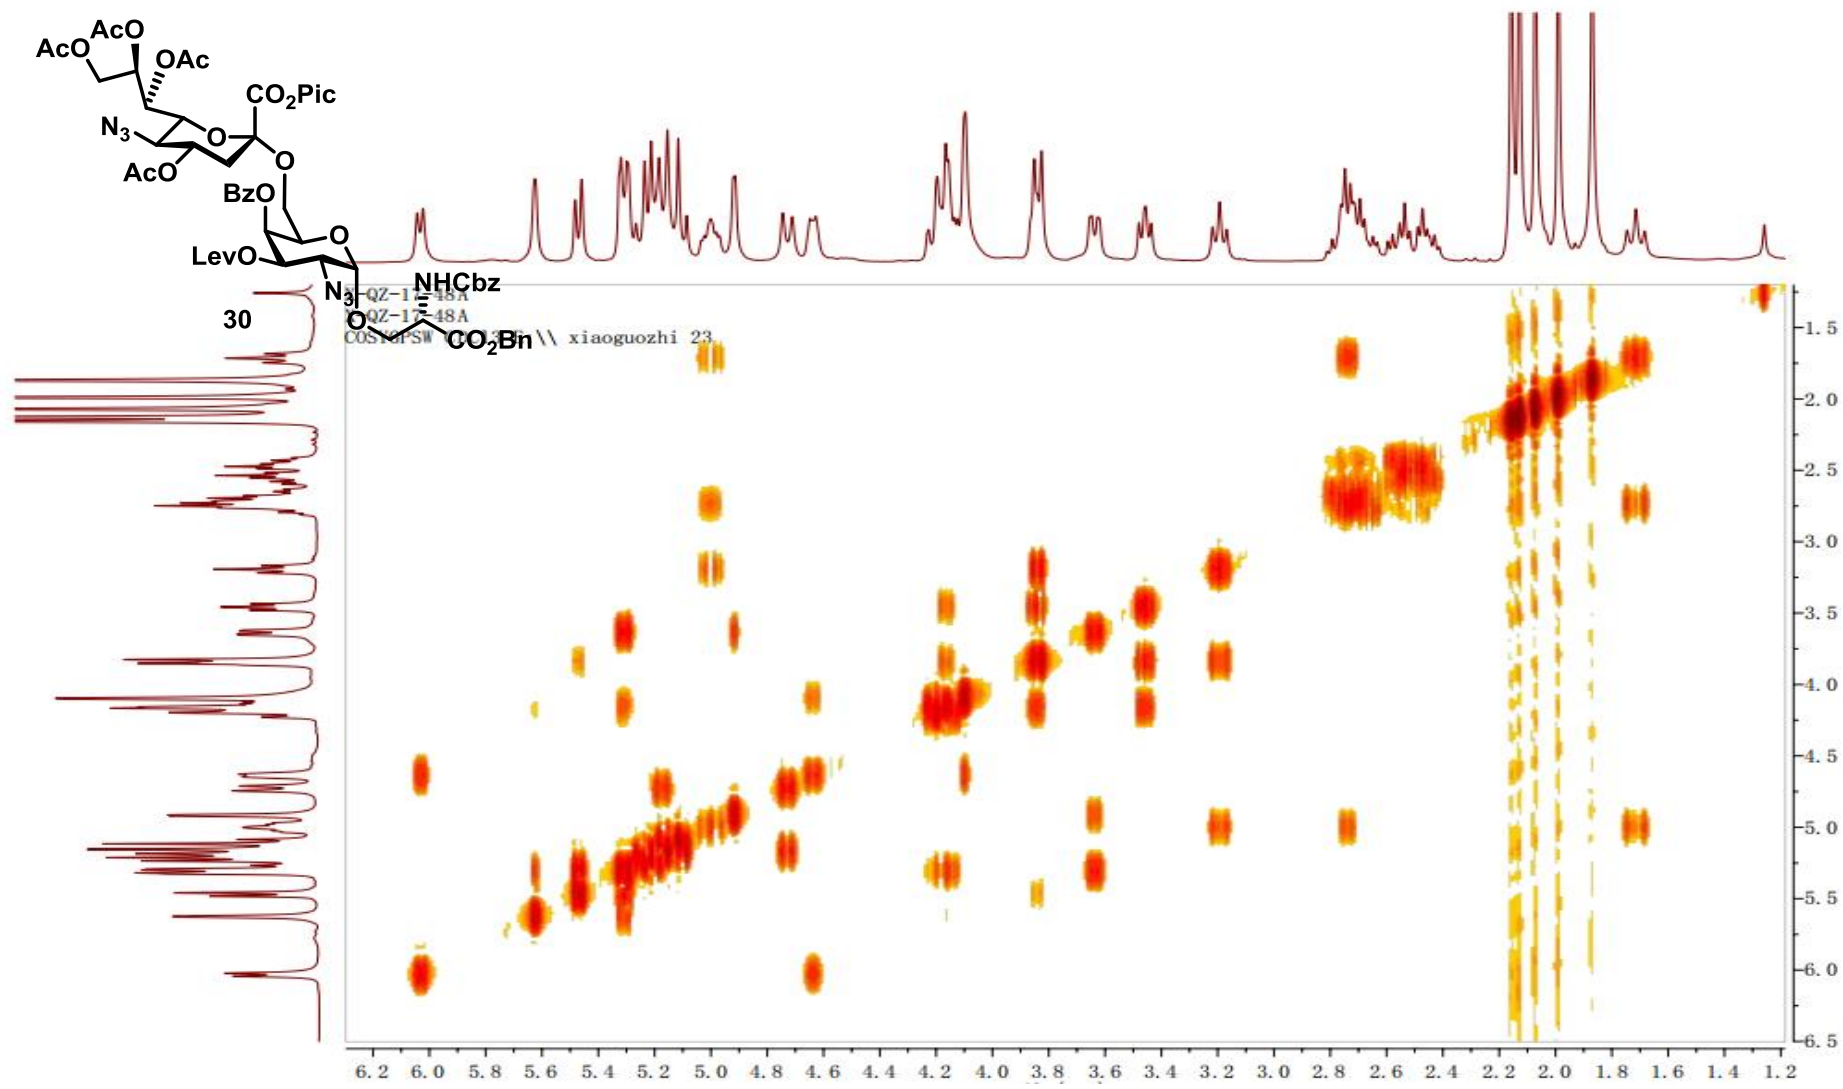

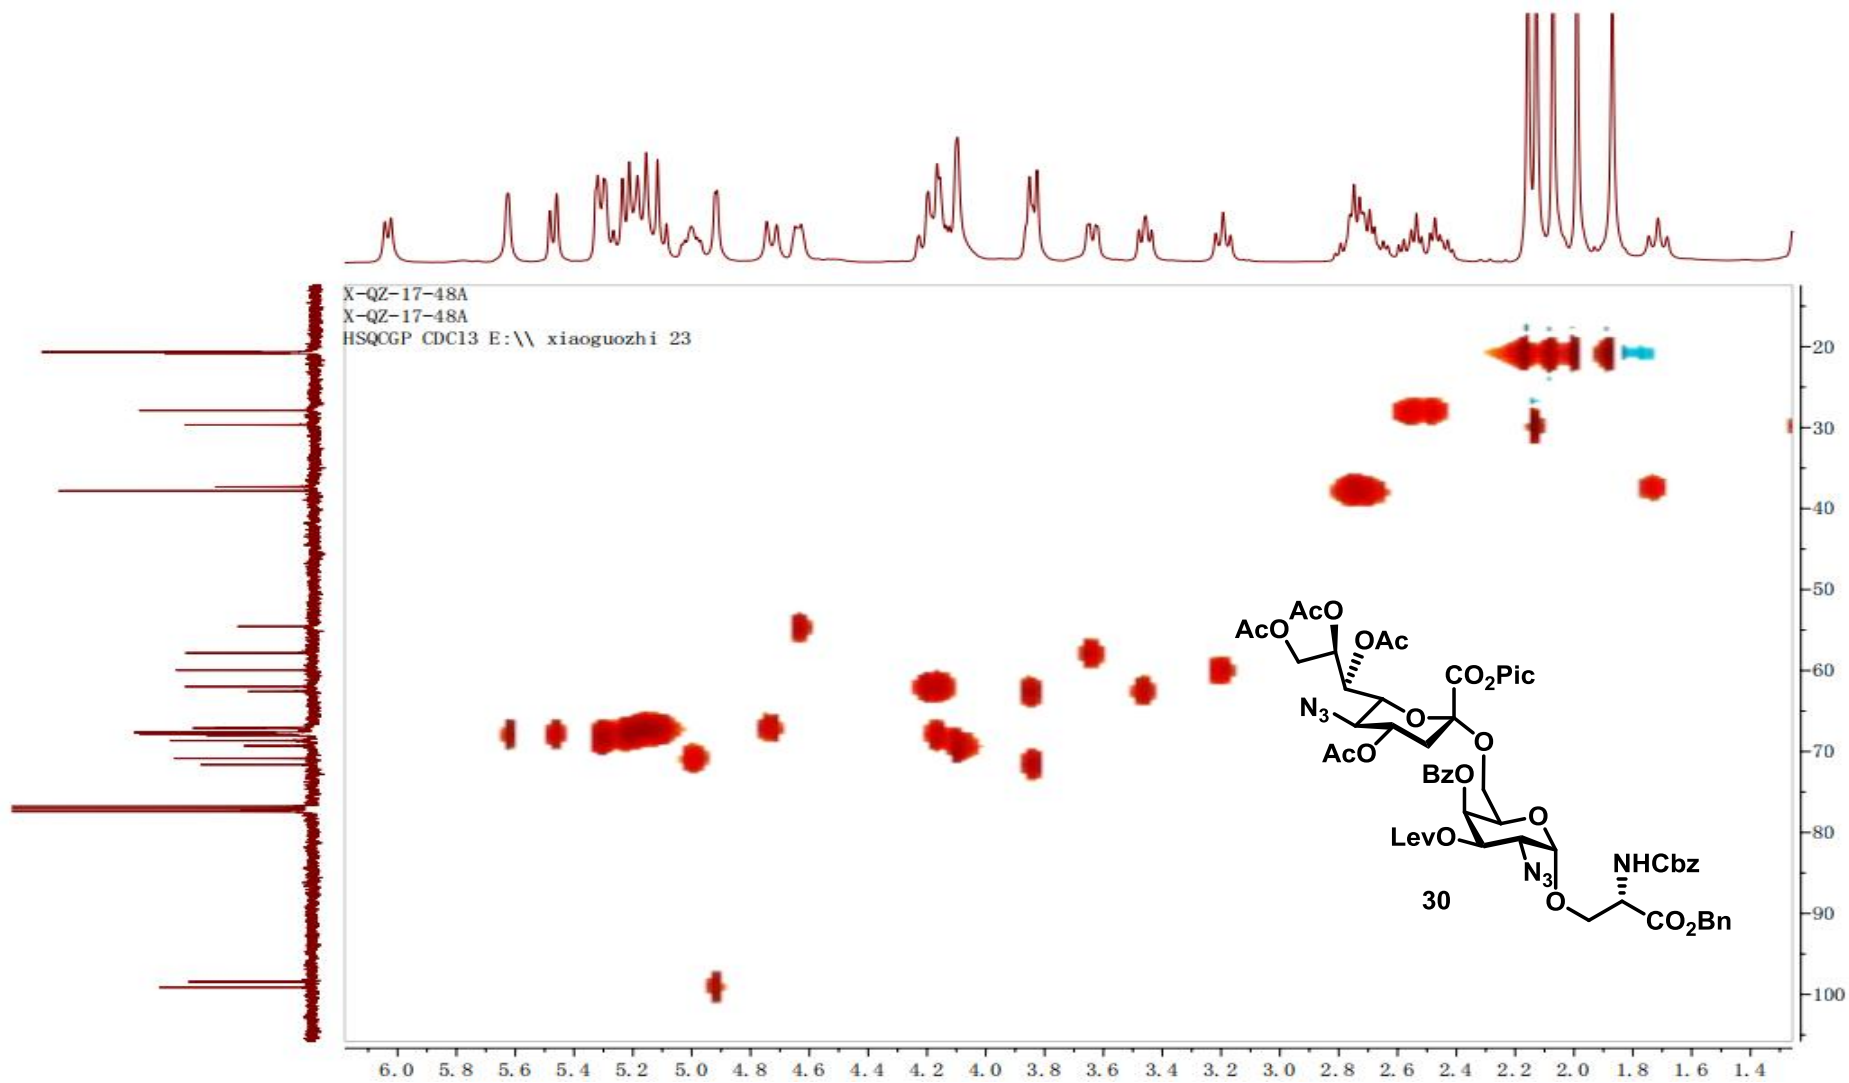

X-QZ-17-67-3  
X-QZ-17-67-3  
PROTON D2O E:\ xiaoguozhi 14

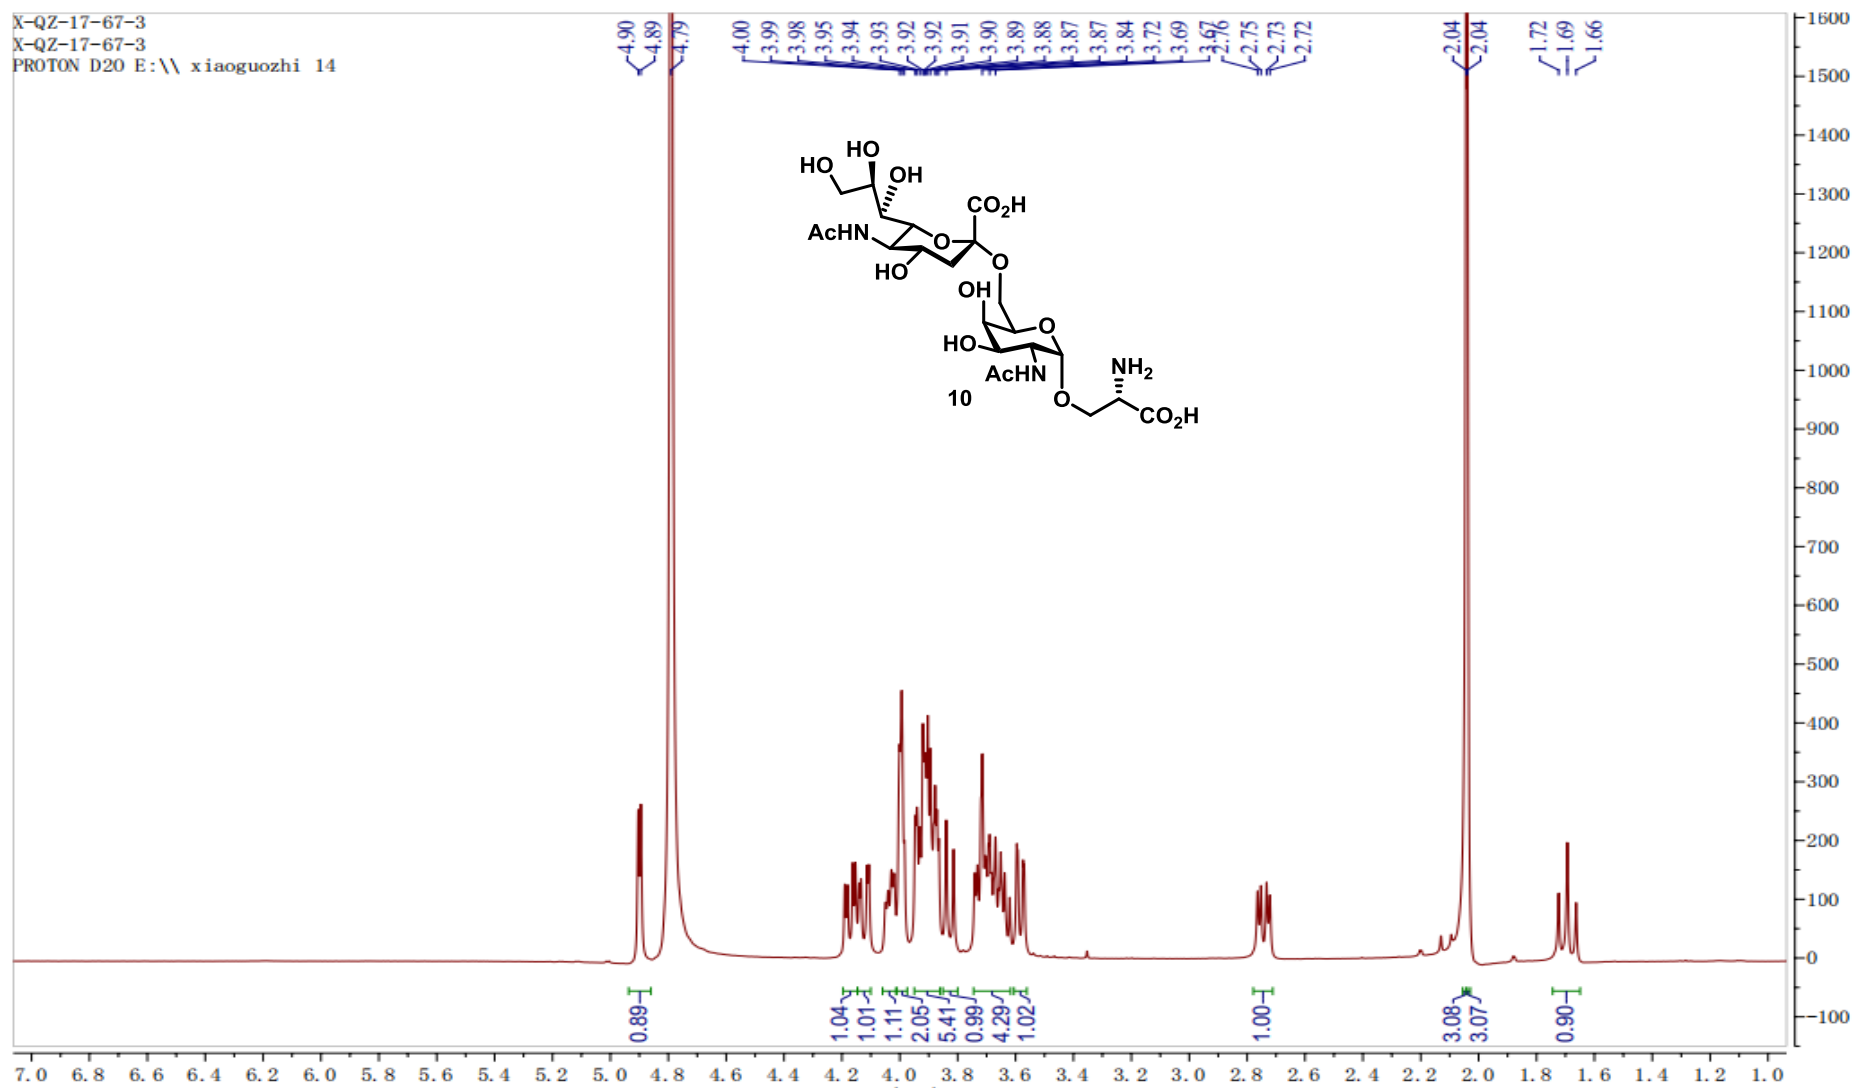



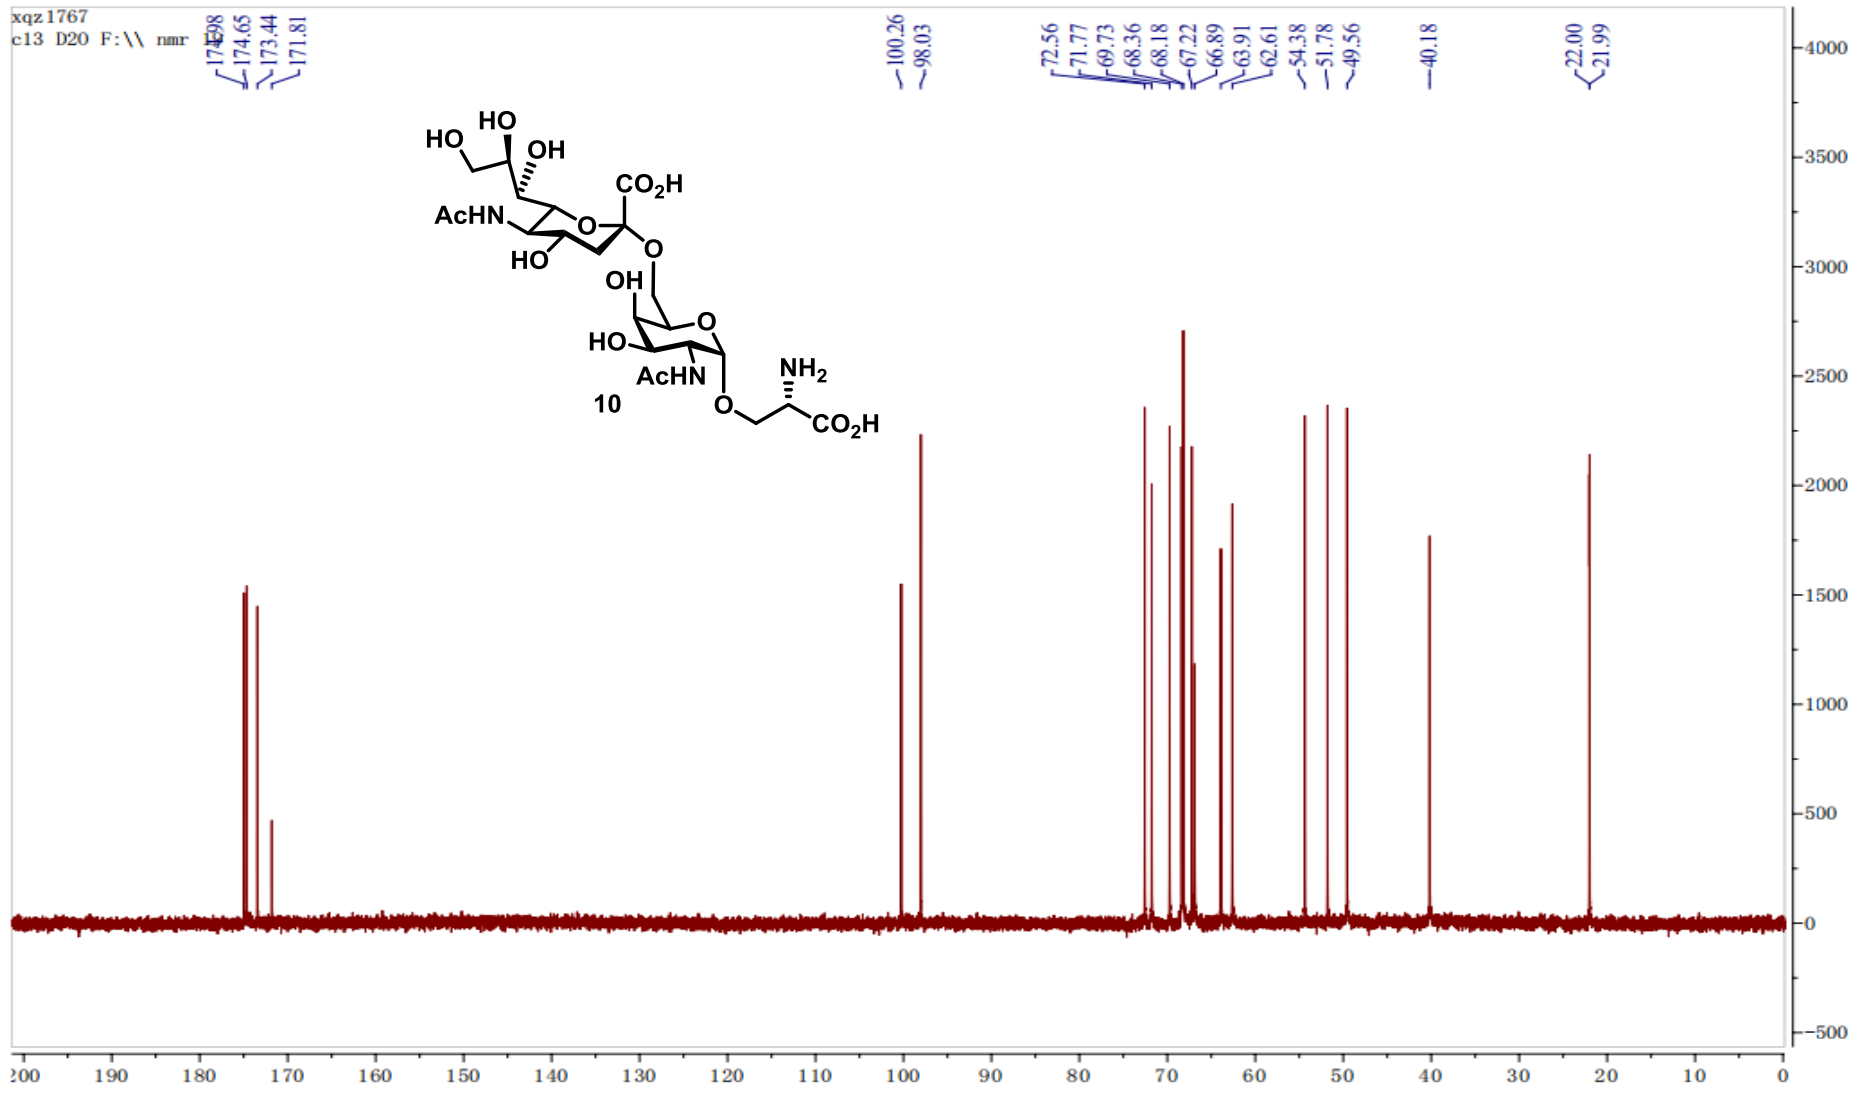

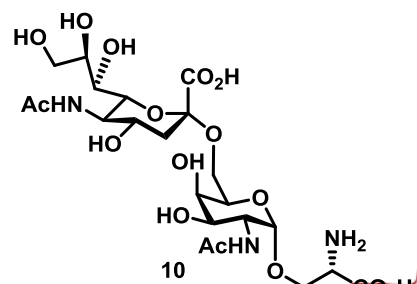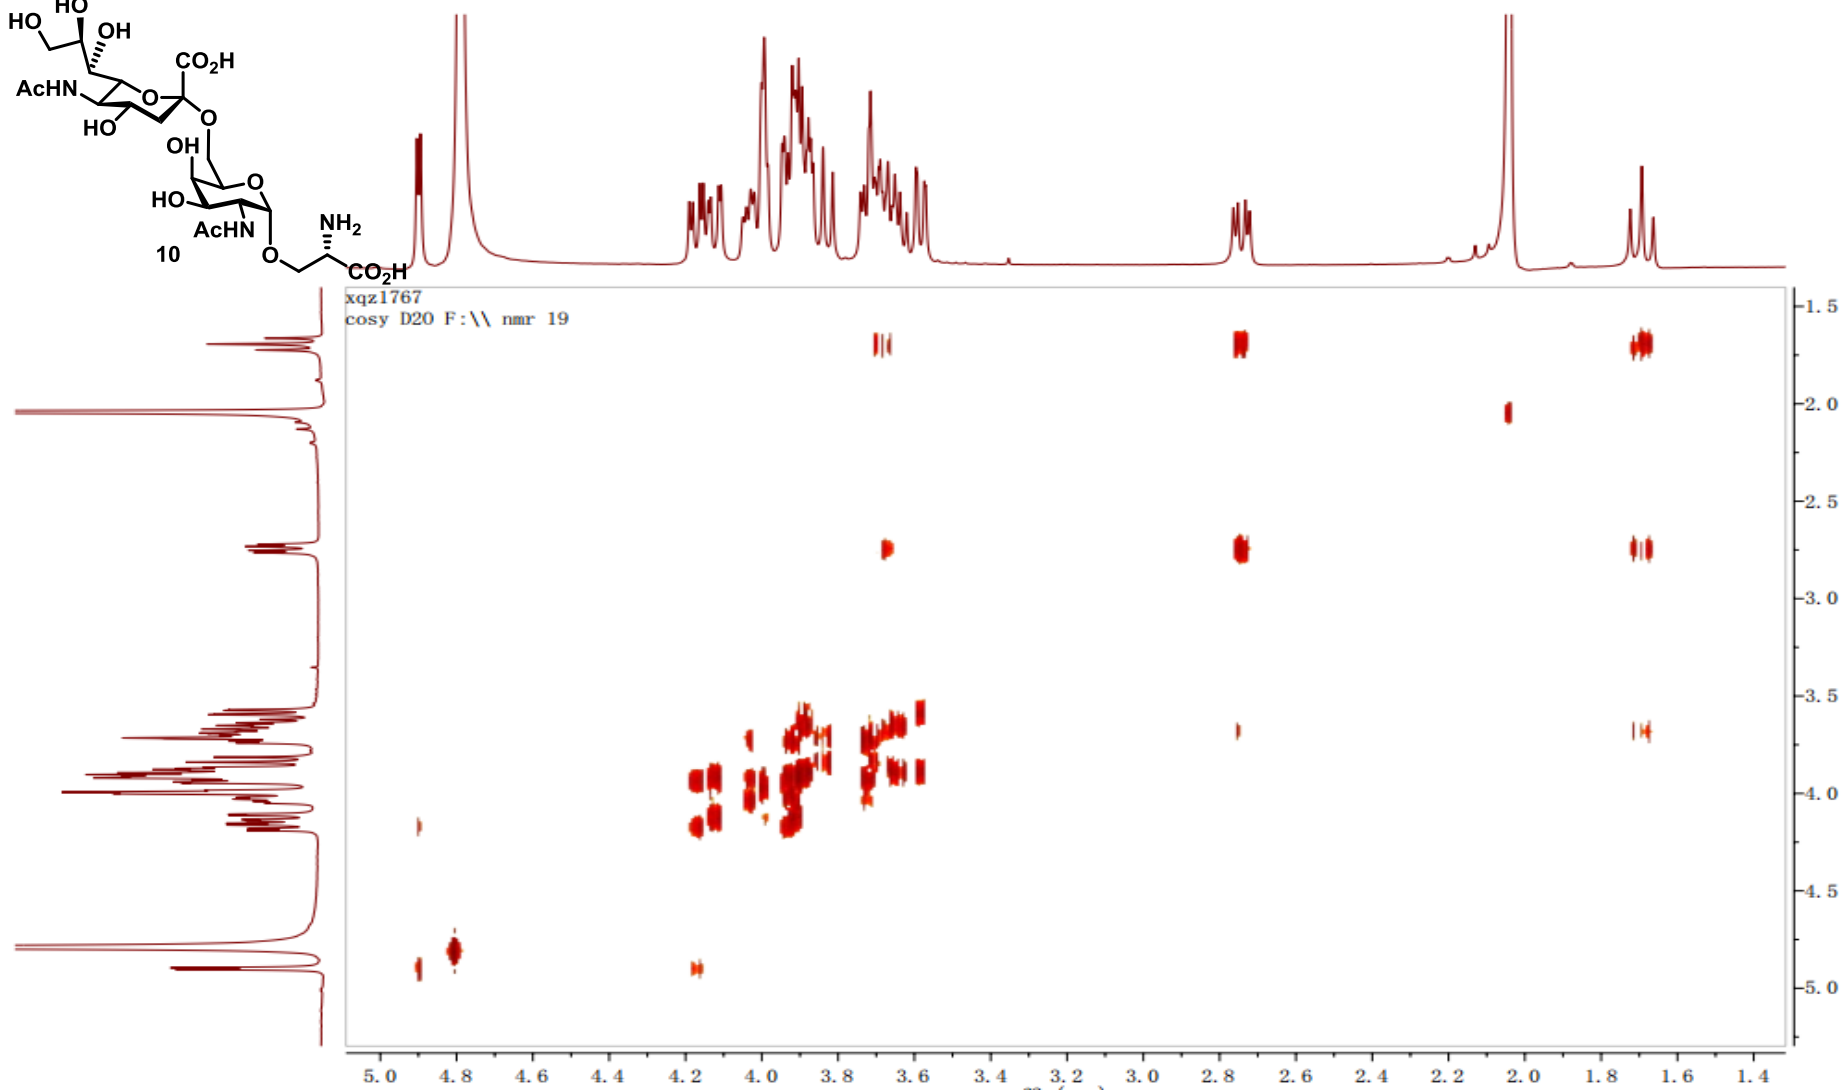

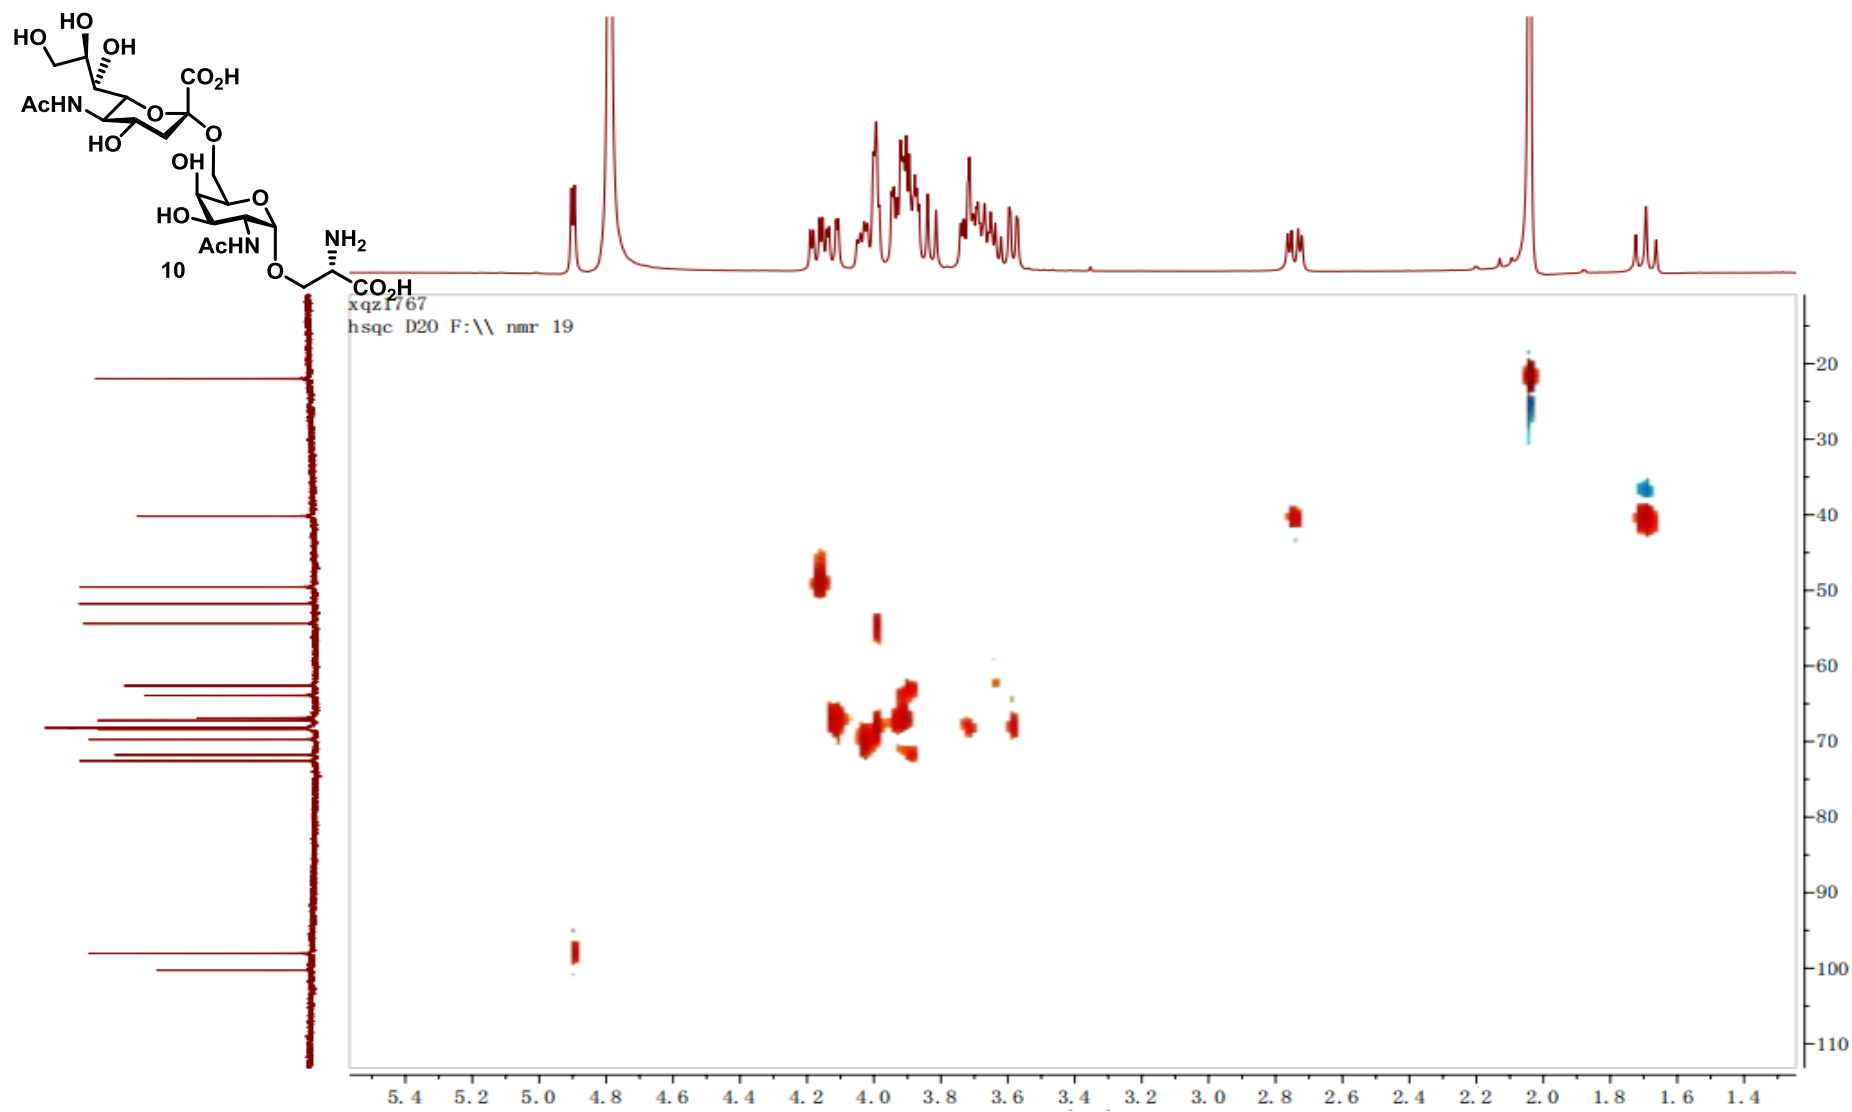

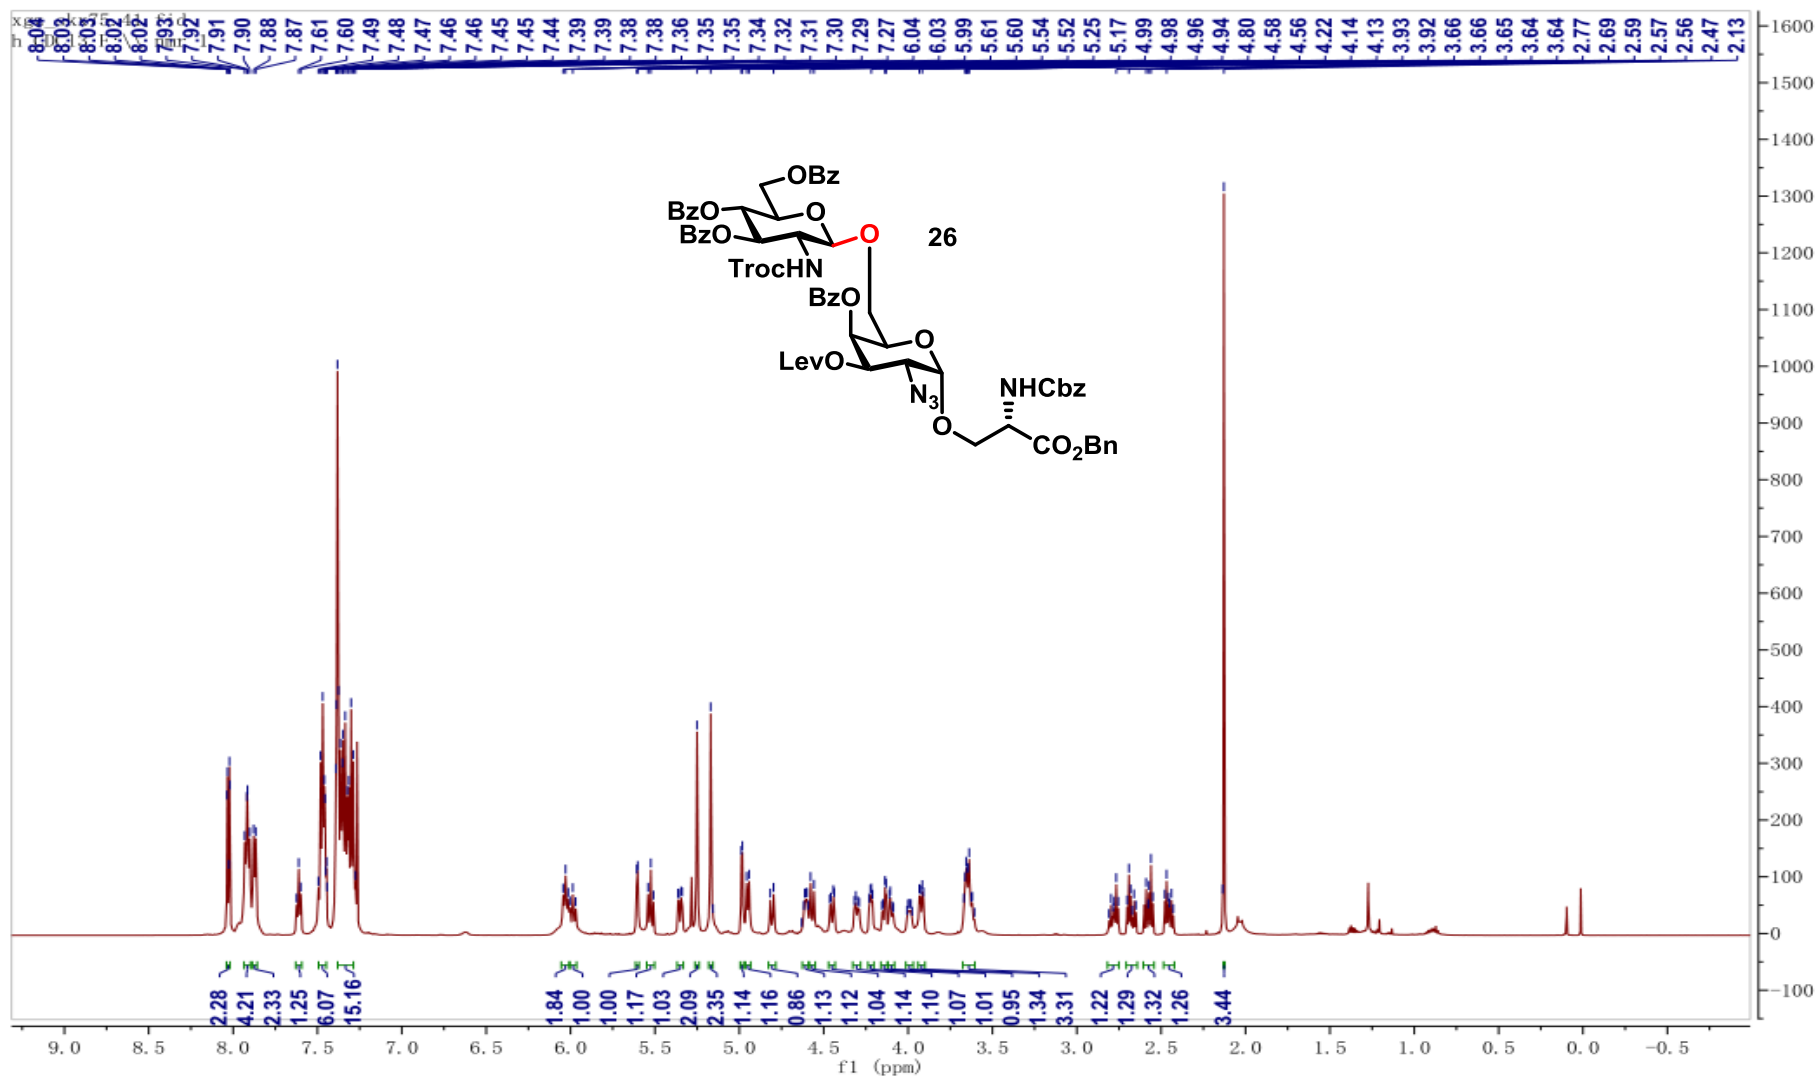

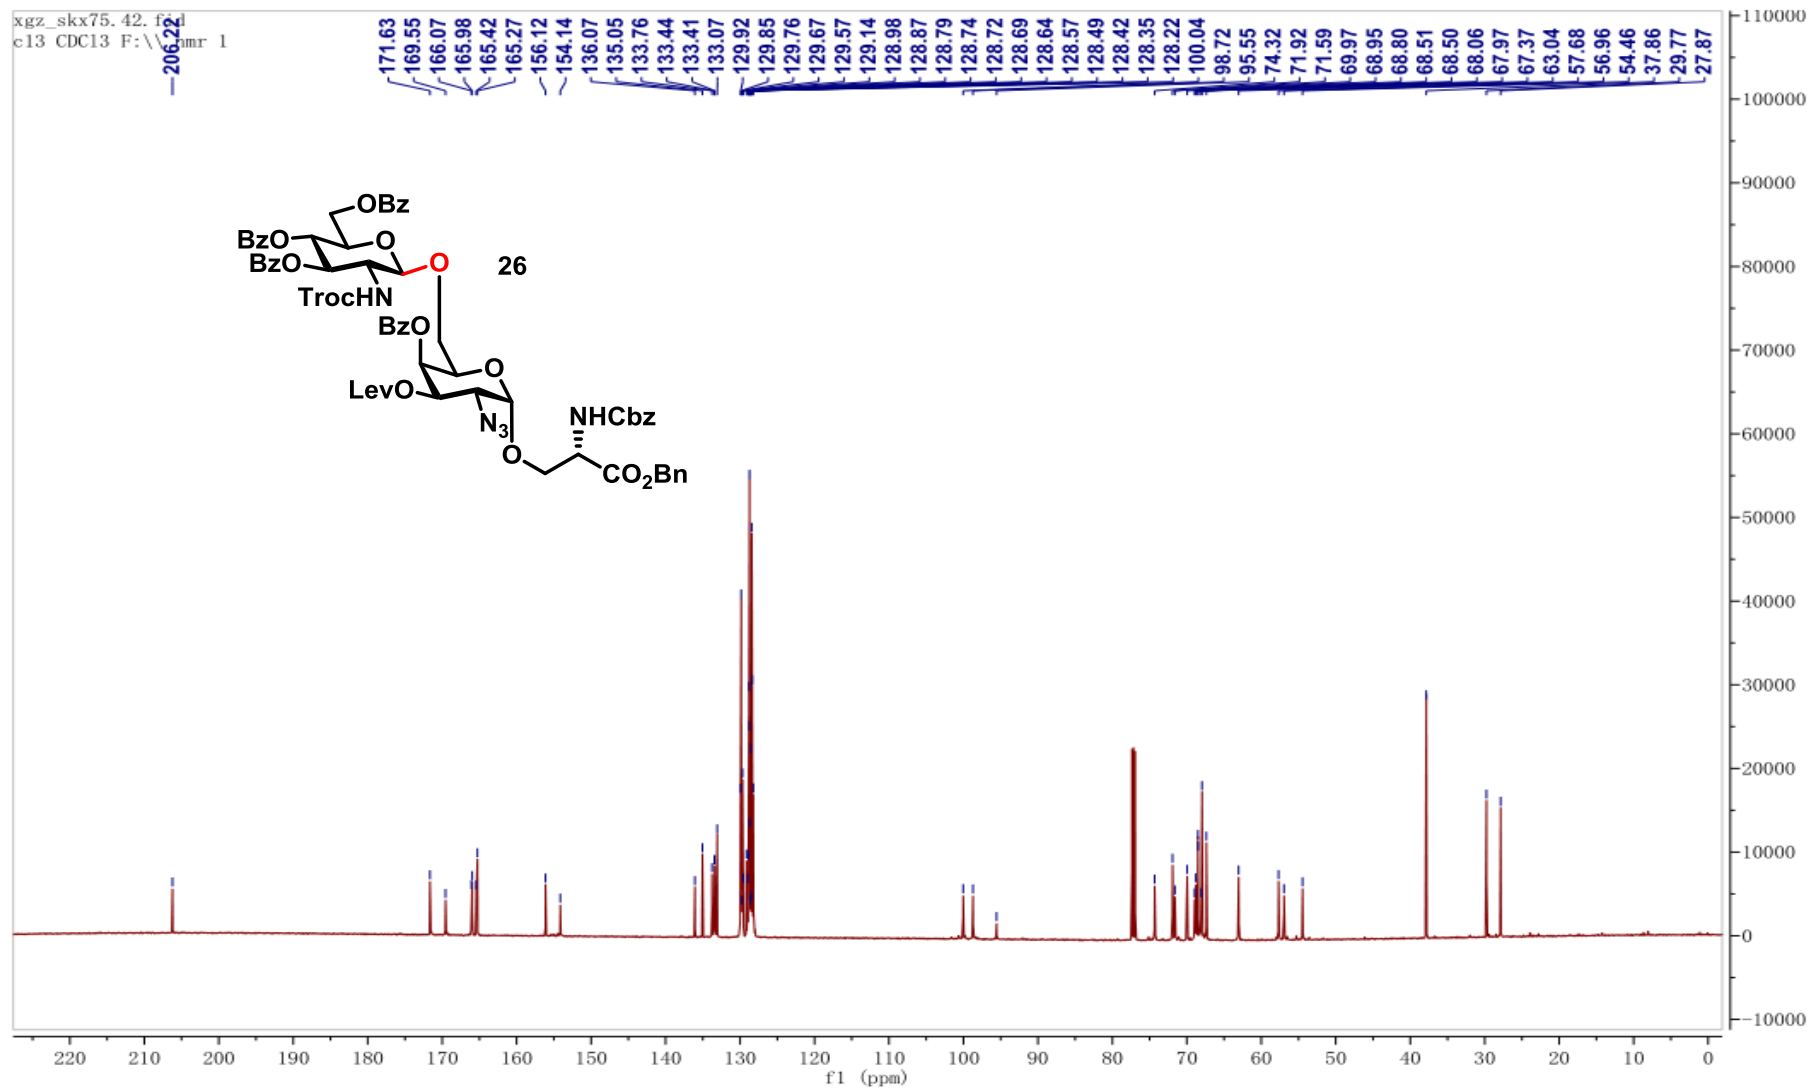

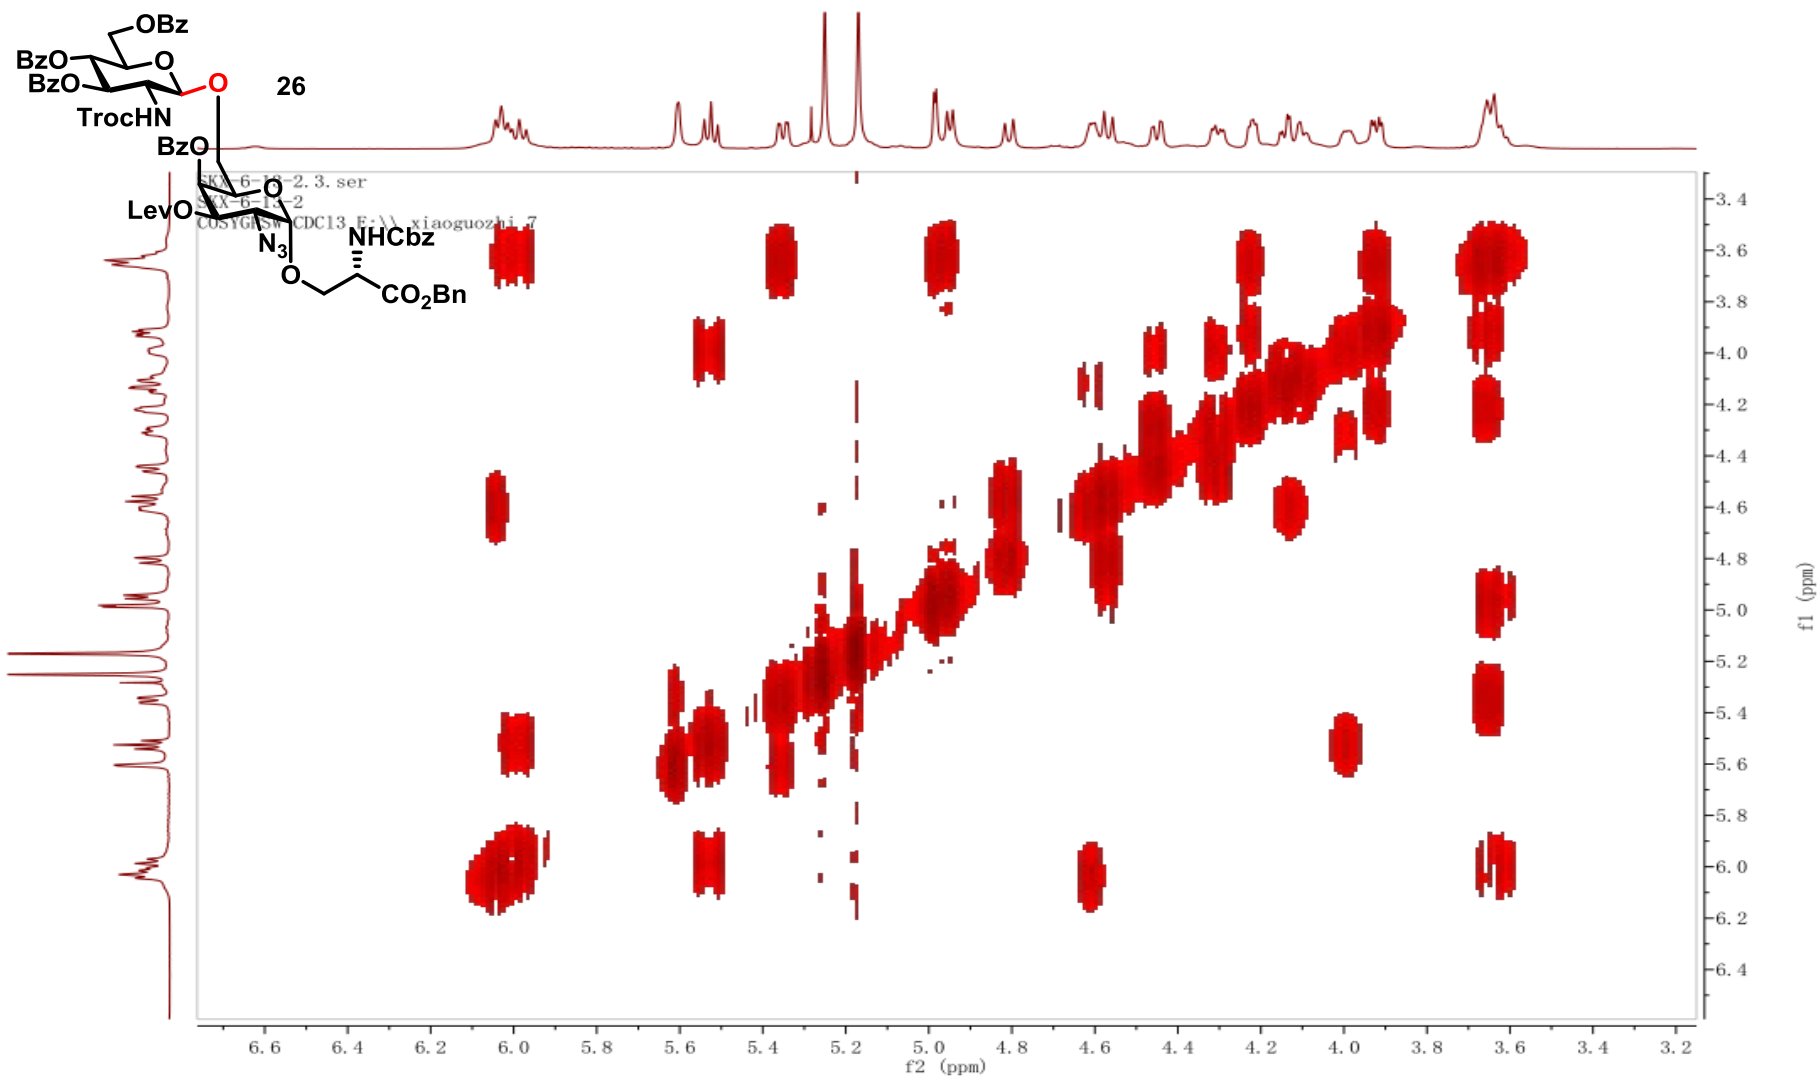

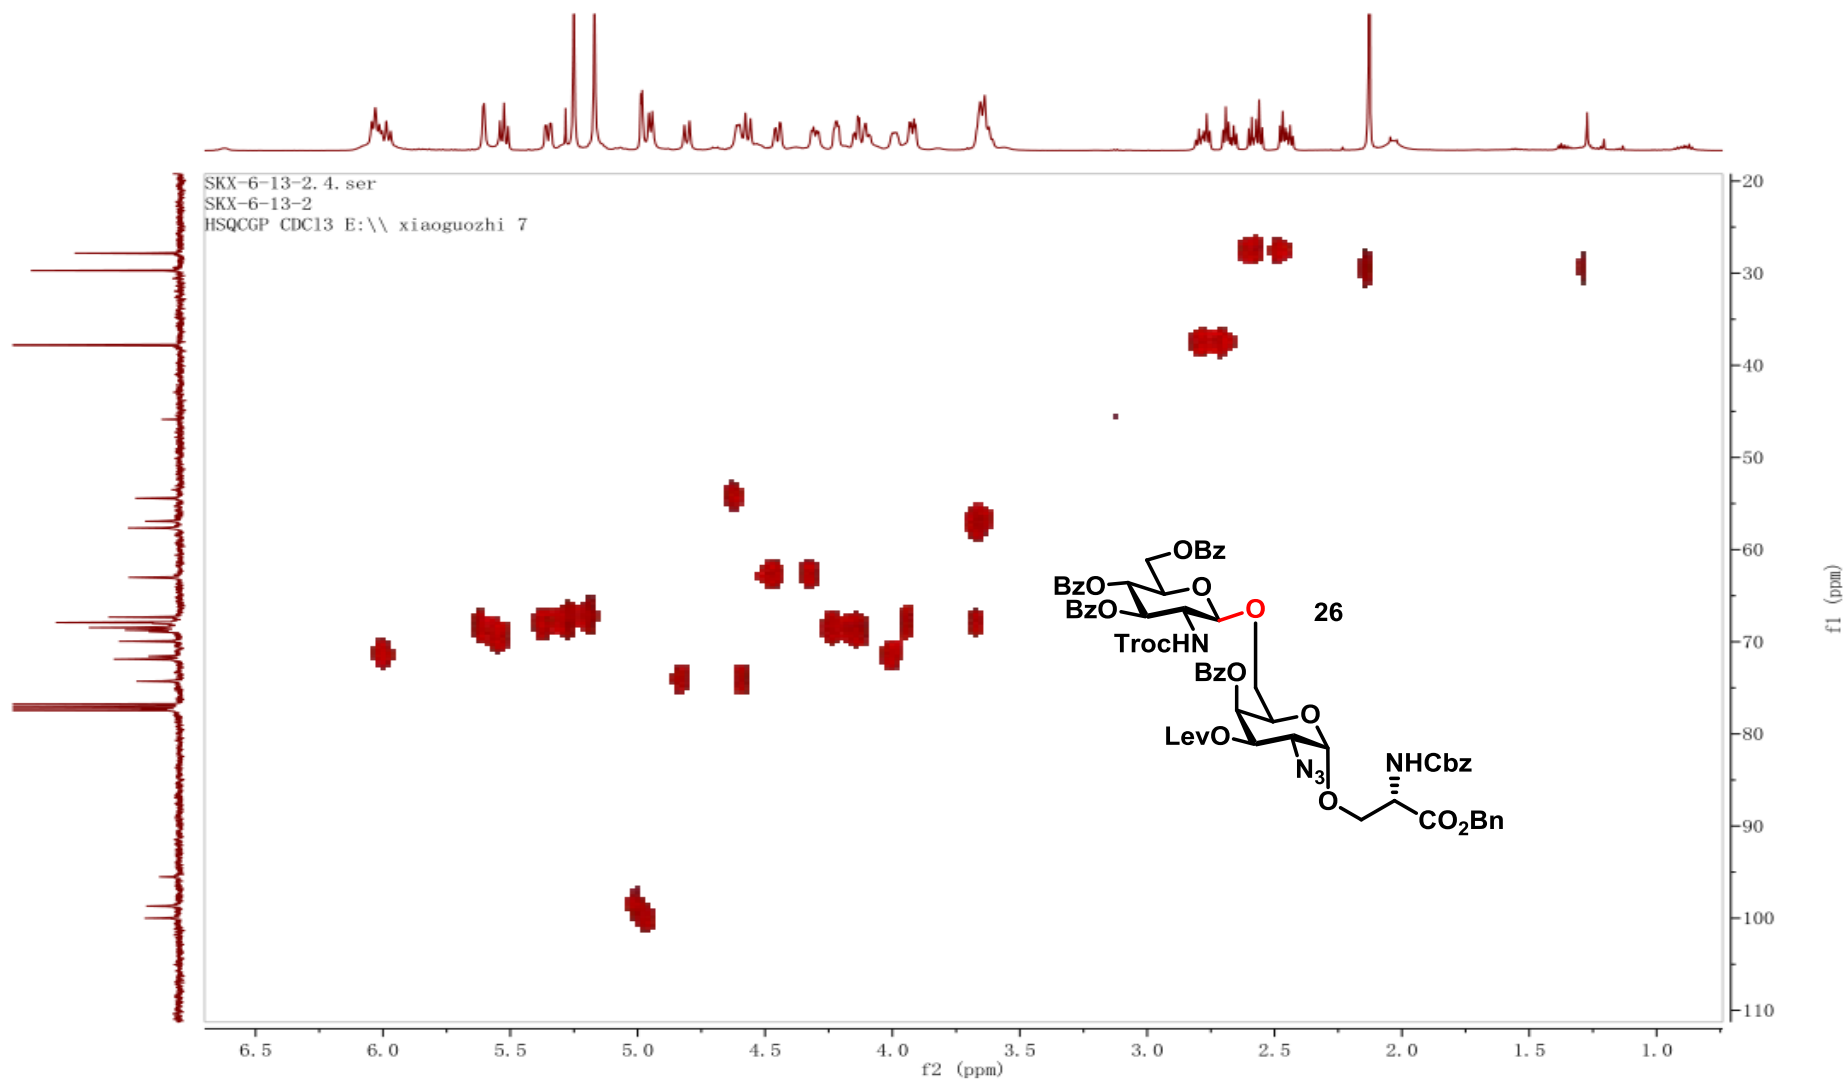

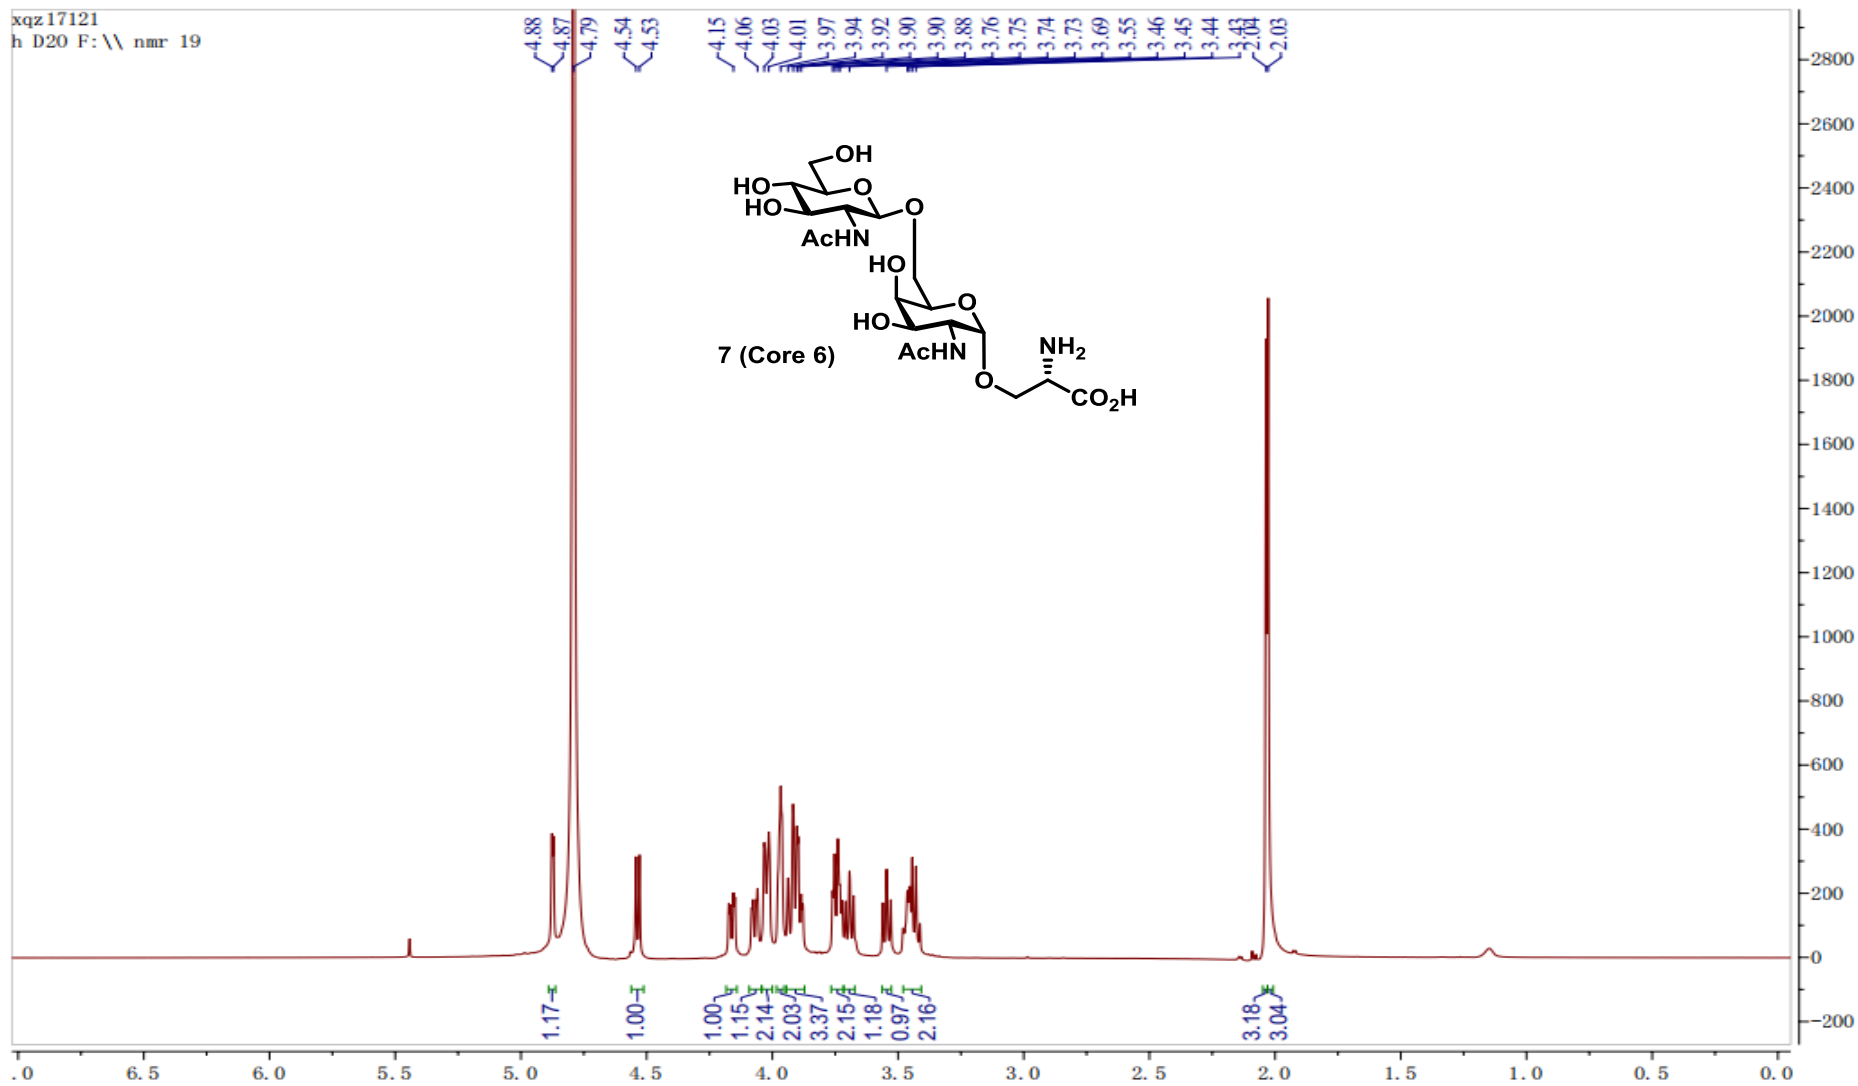



xqz17121  
c13 D2O F:\ nmr 19

174.67  
174.54  
171.64

101.51  
98.00

75.82  
73.62  
69.92  
69.86  
69.77  
68.44  
67.24  
66.48  
60.61  
55.49  
54.37  
49.52

22.20  
21.98

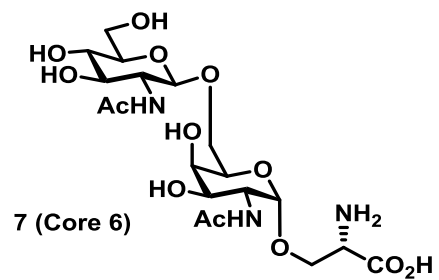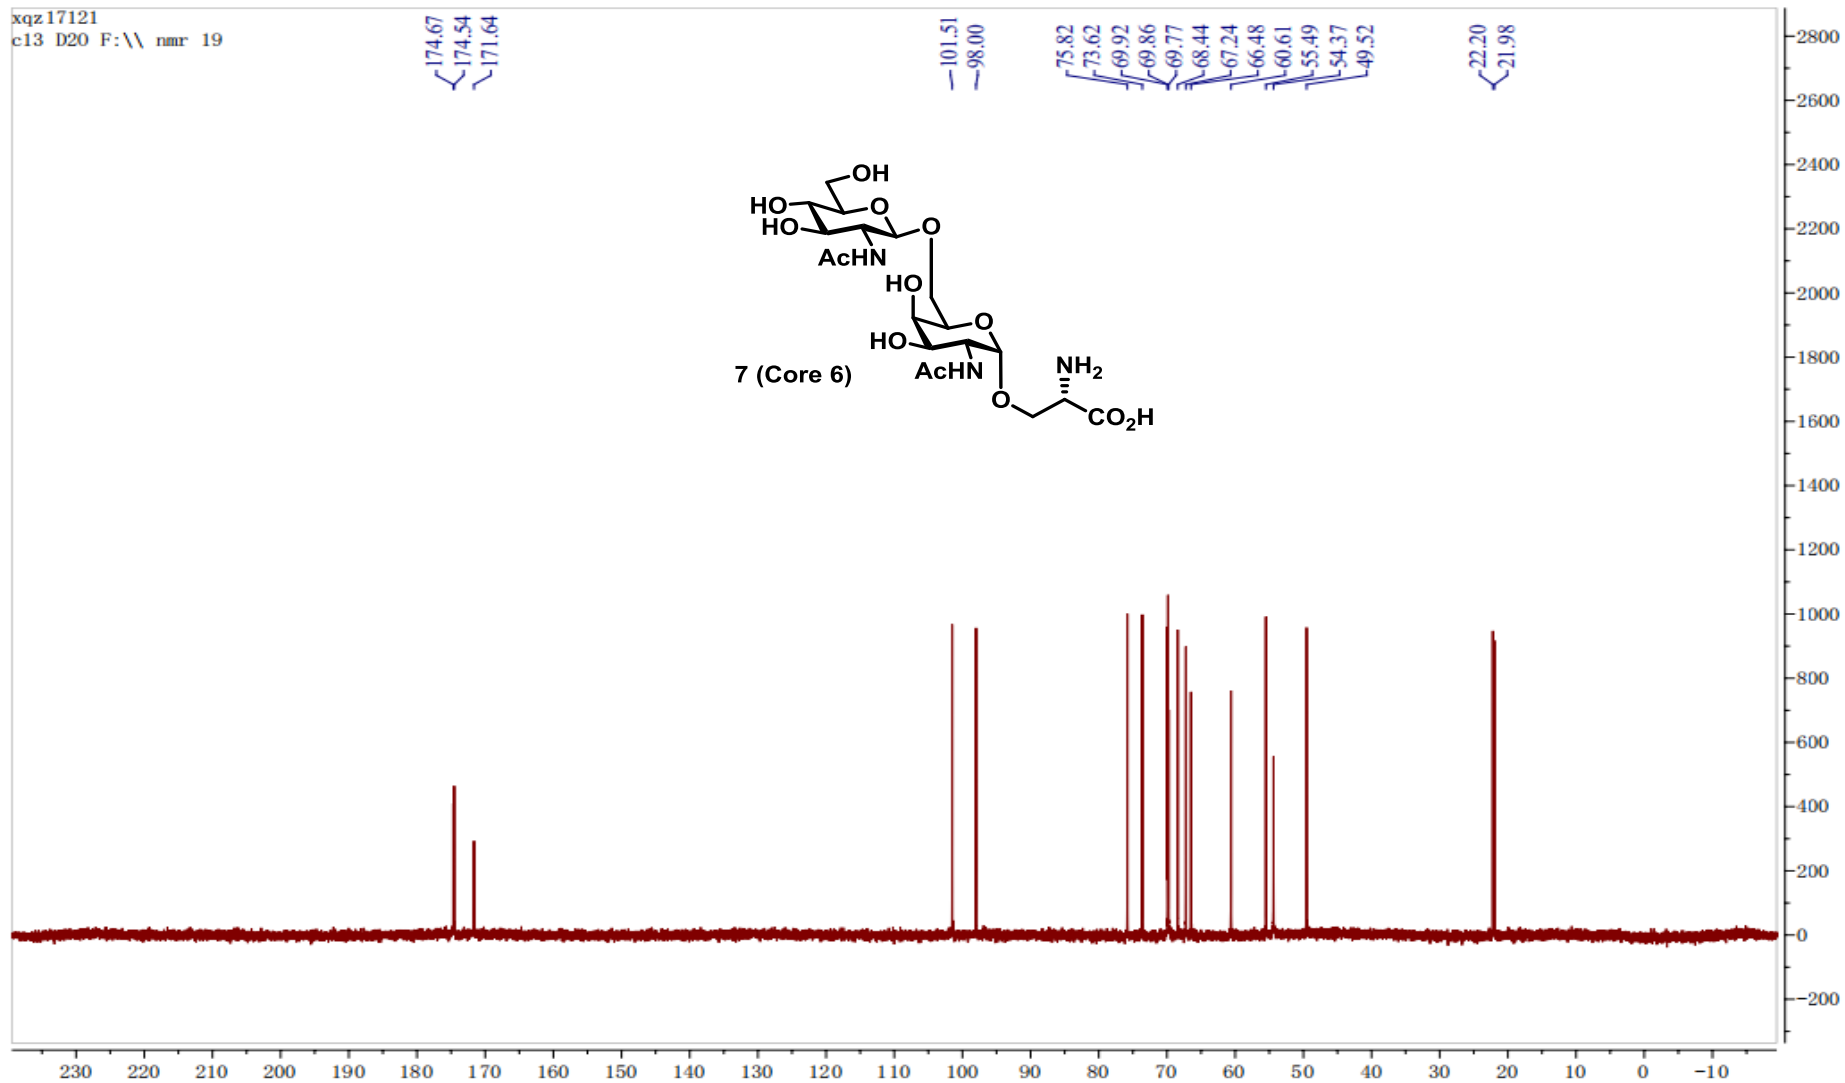

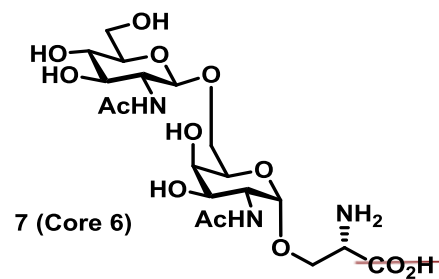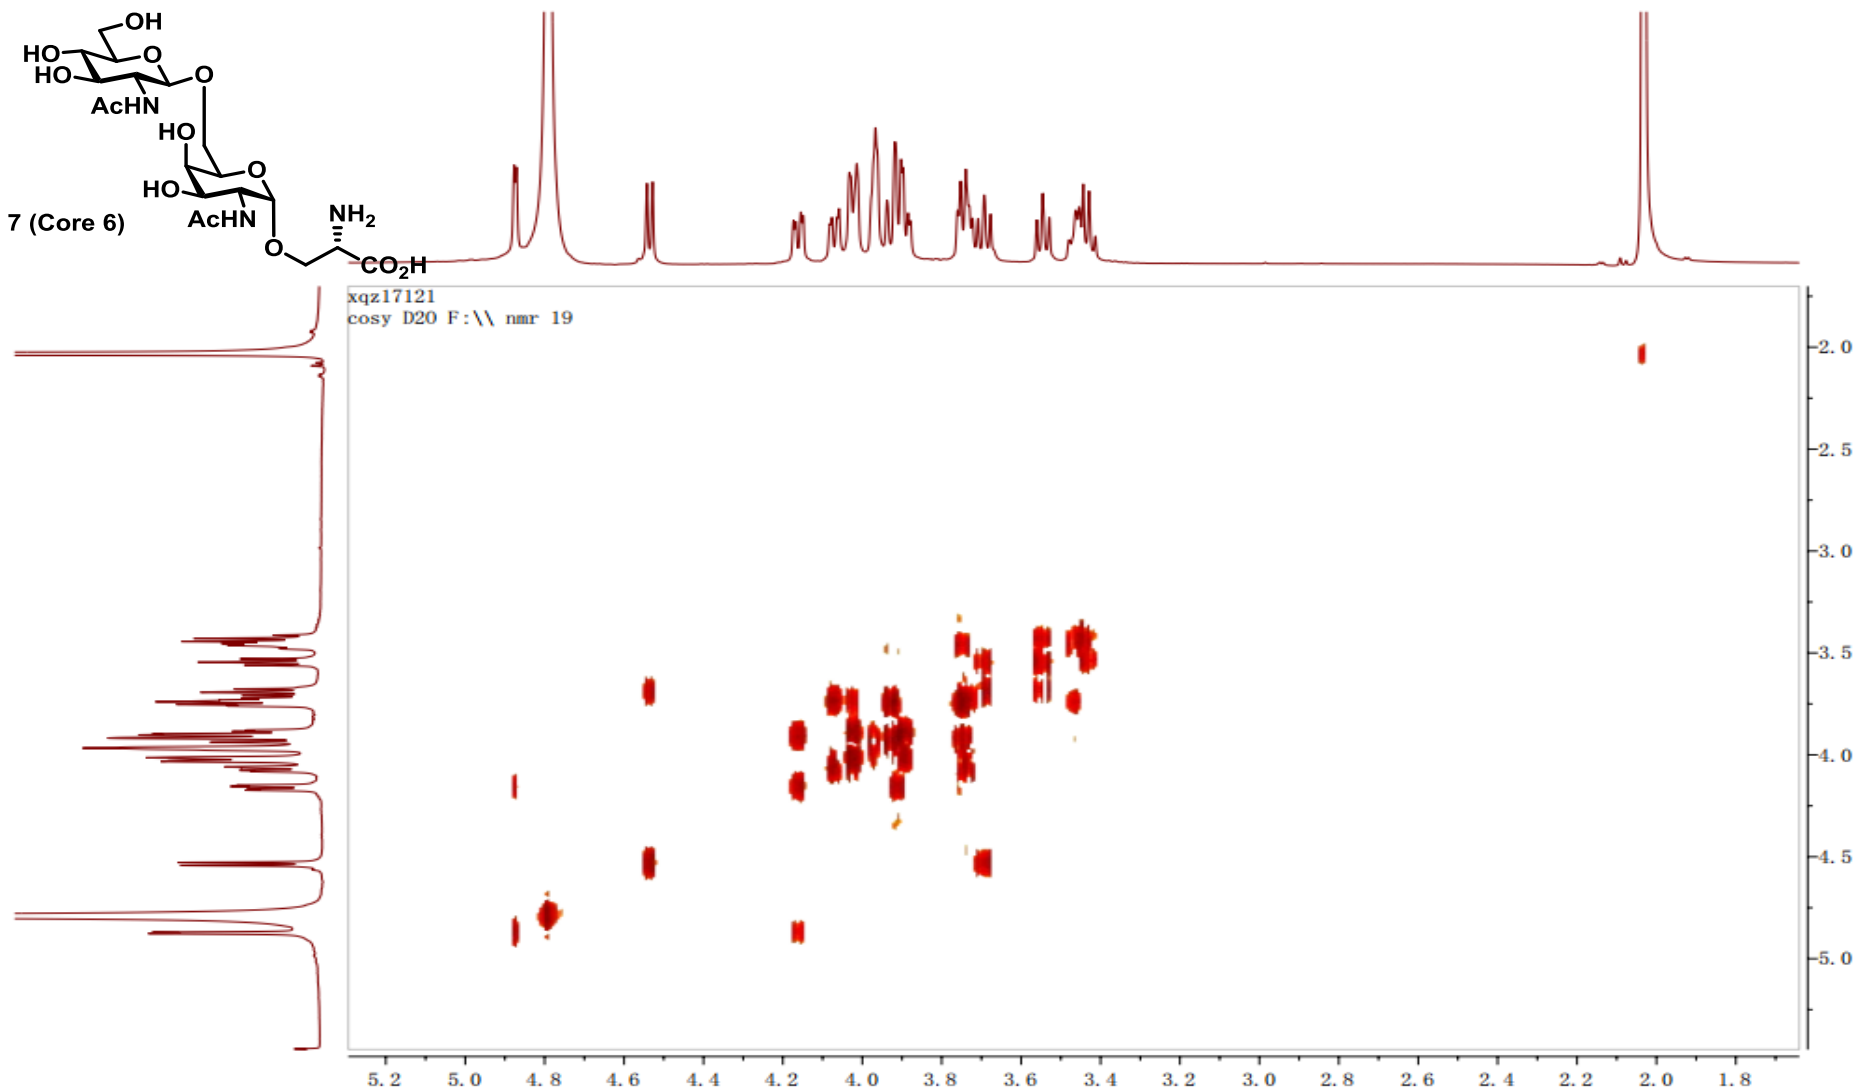

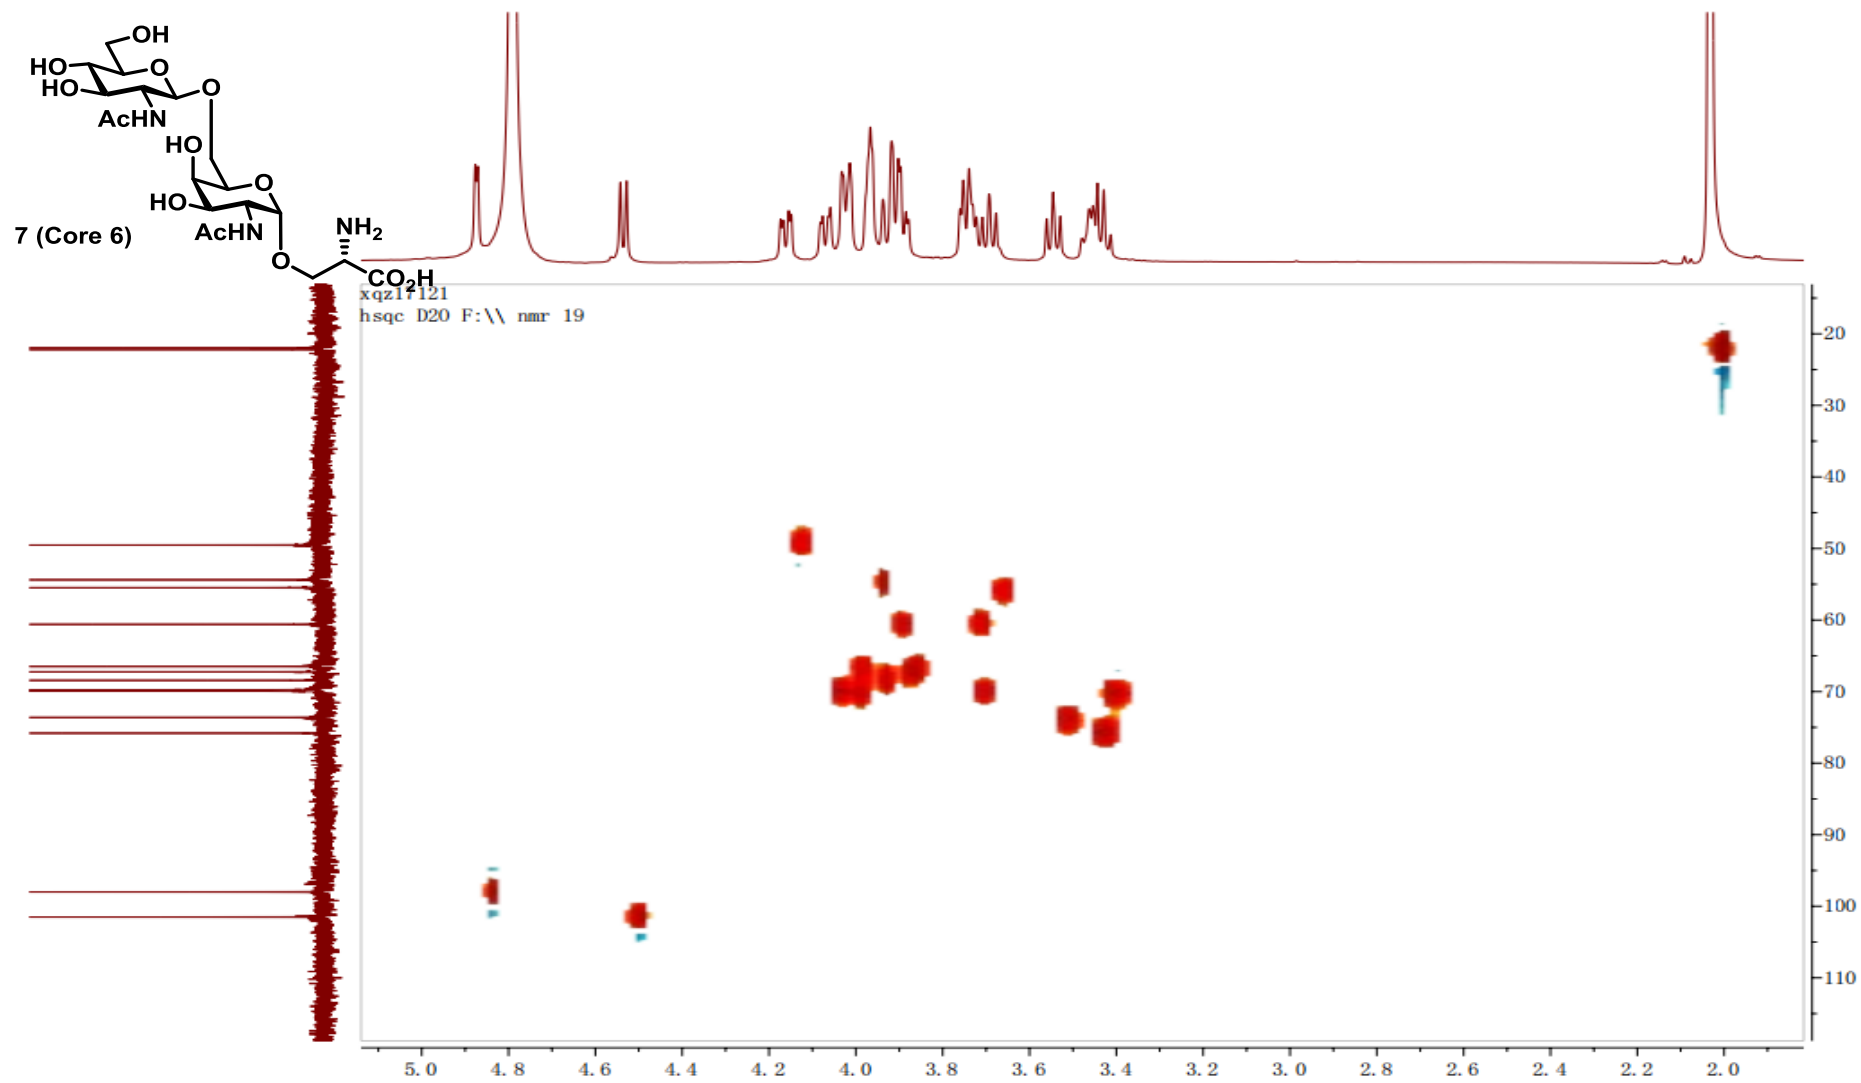

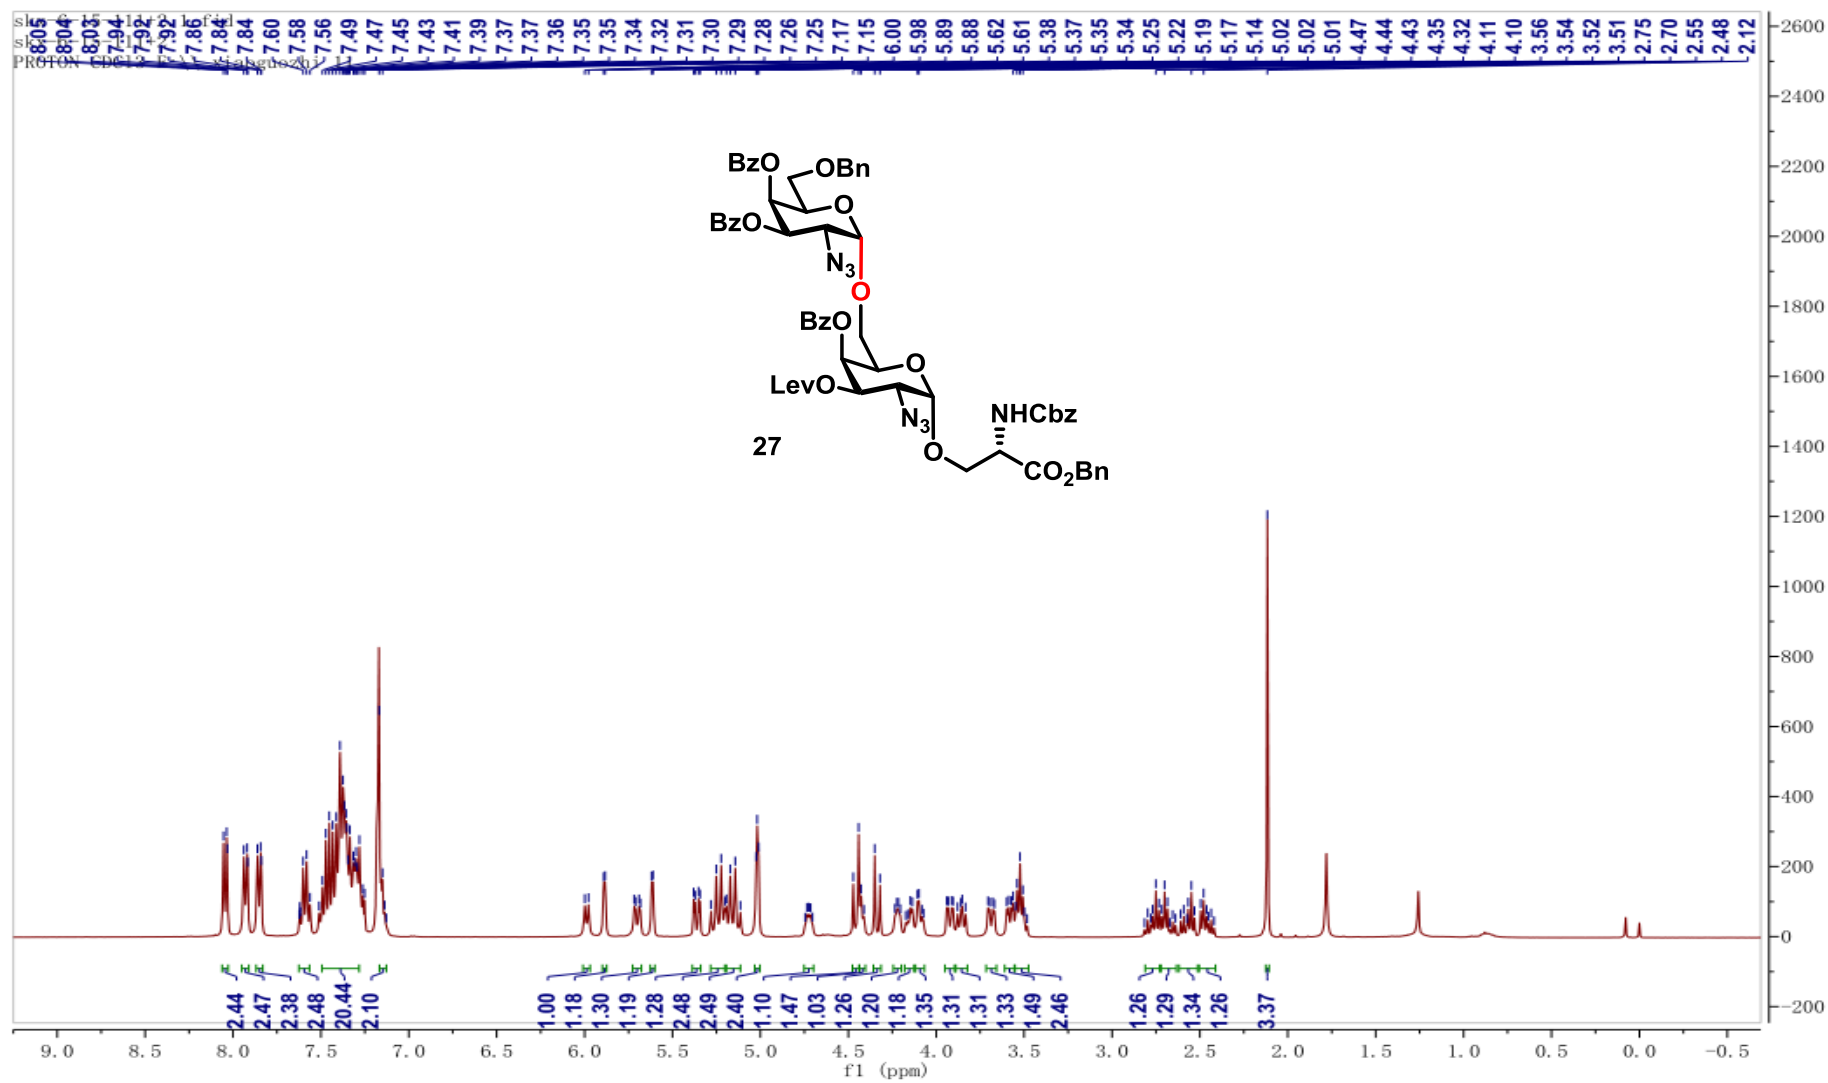

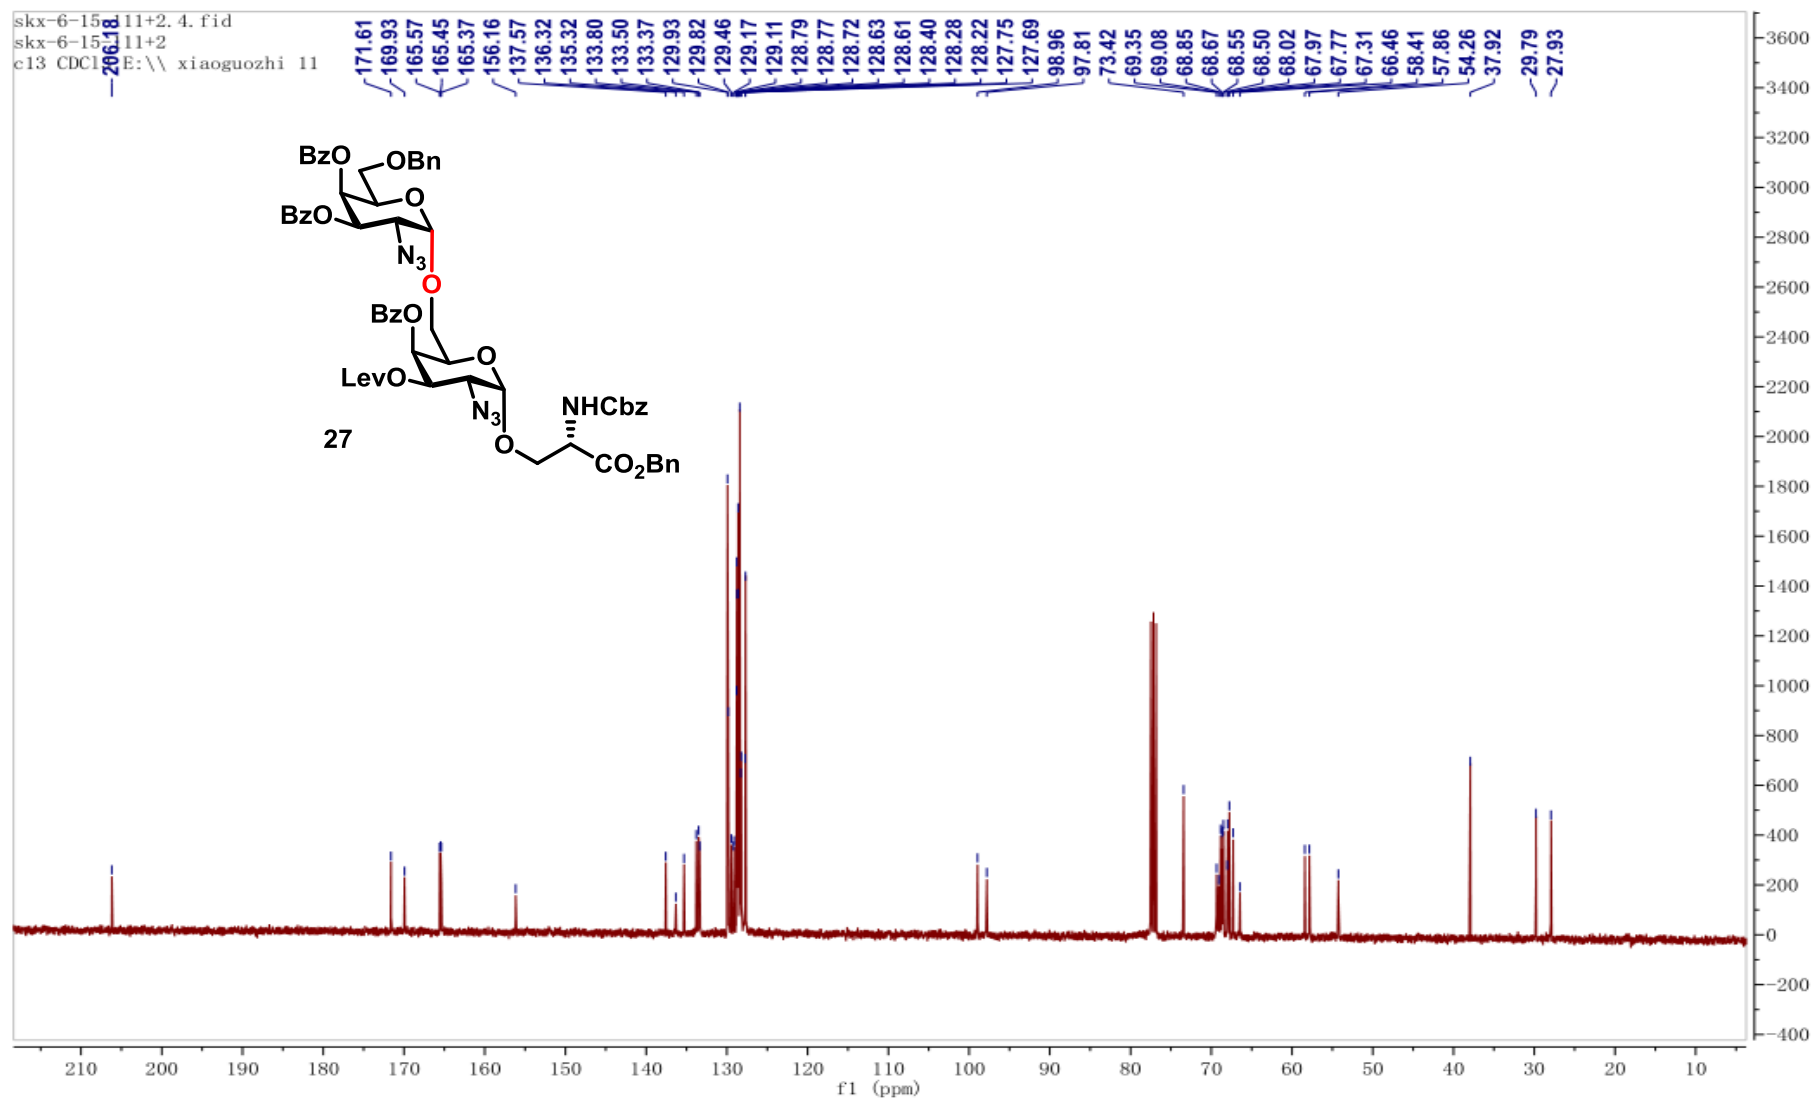

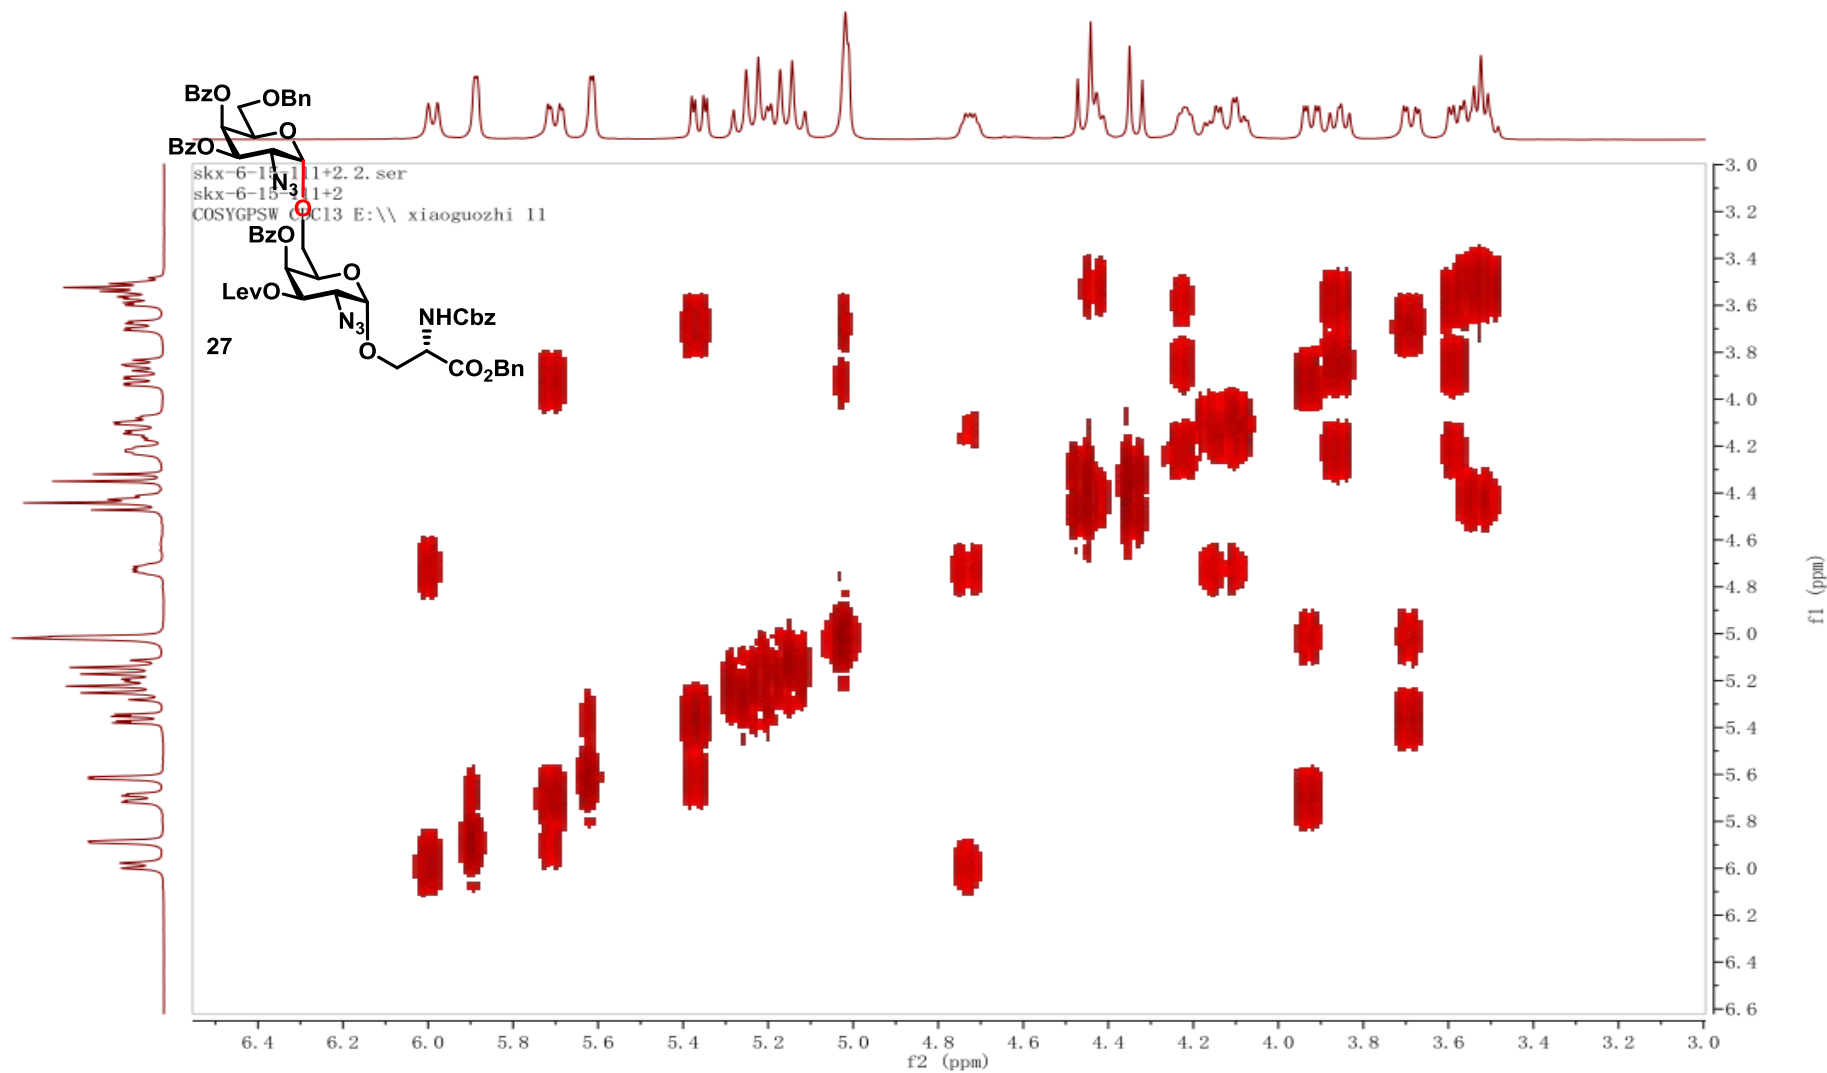

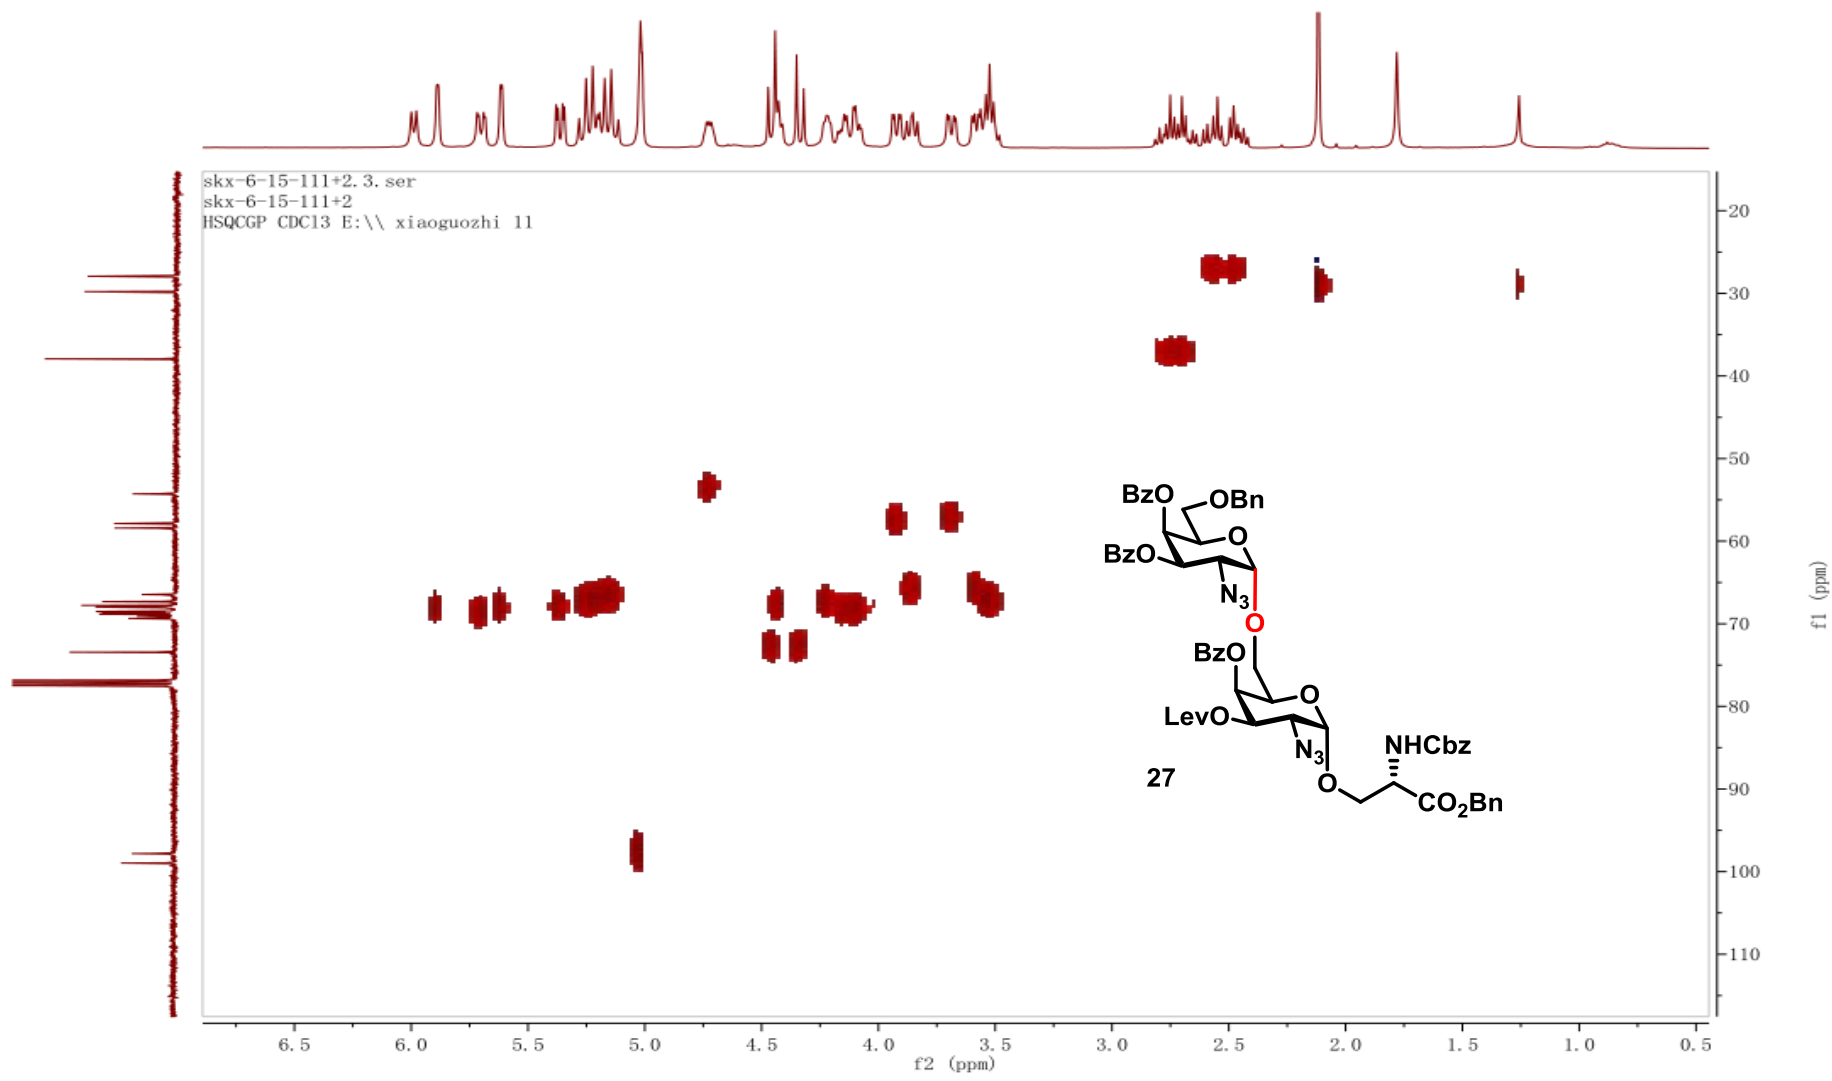

X-QZ-16-91-2  
X-QZ-16-91-2  
PROTON D20 E:\\ xiaoguozi 15

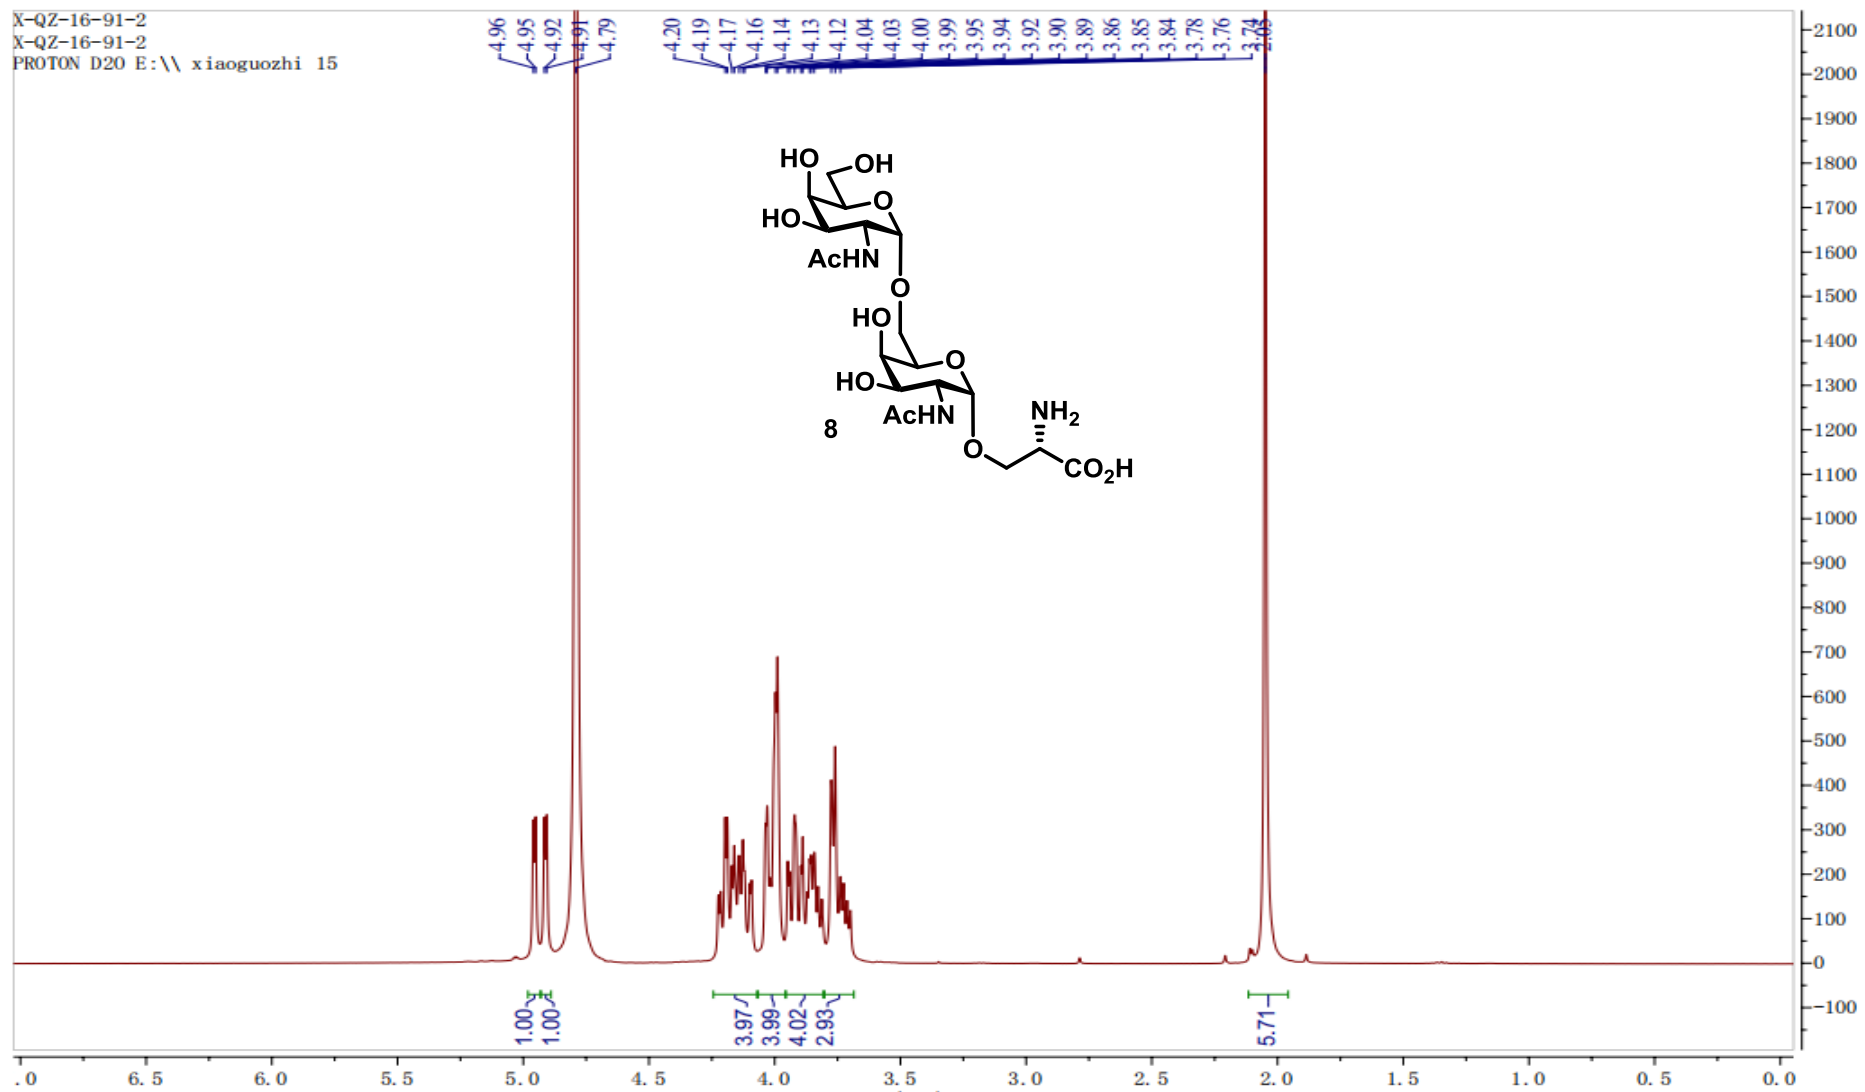



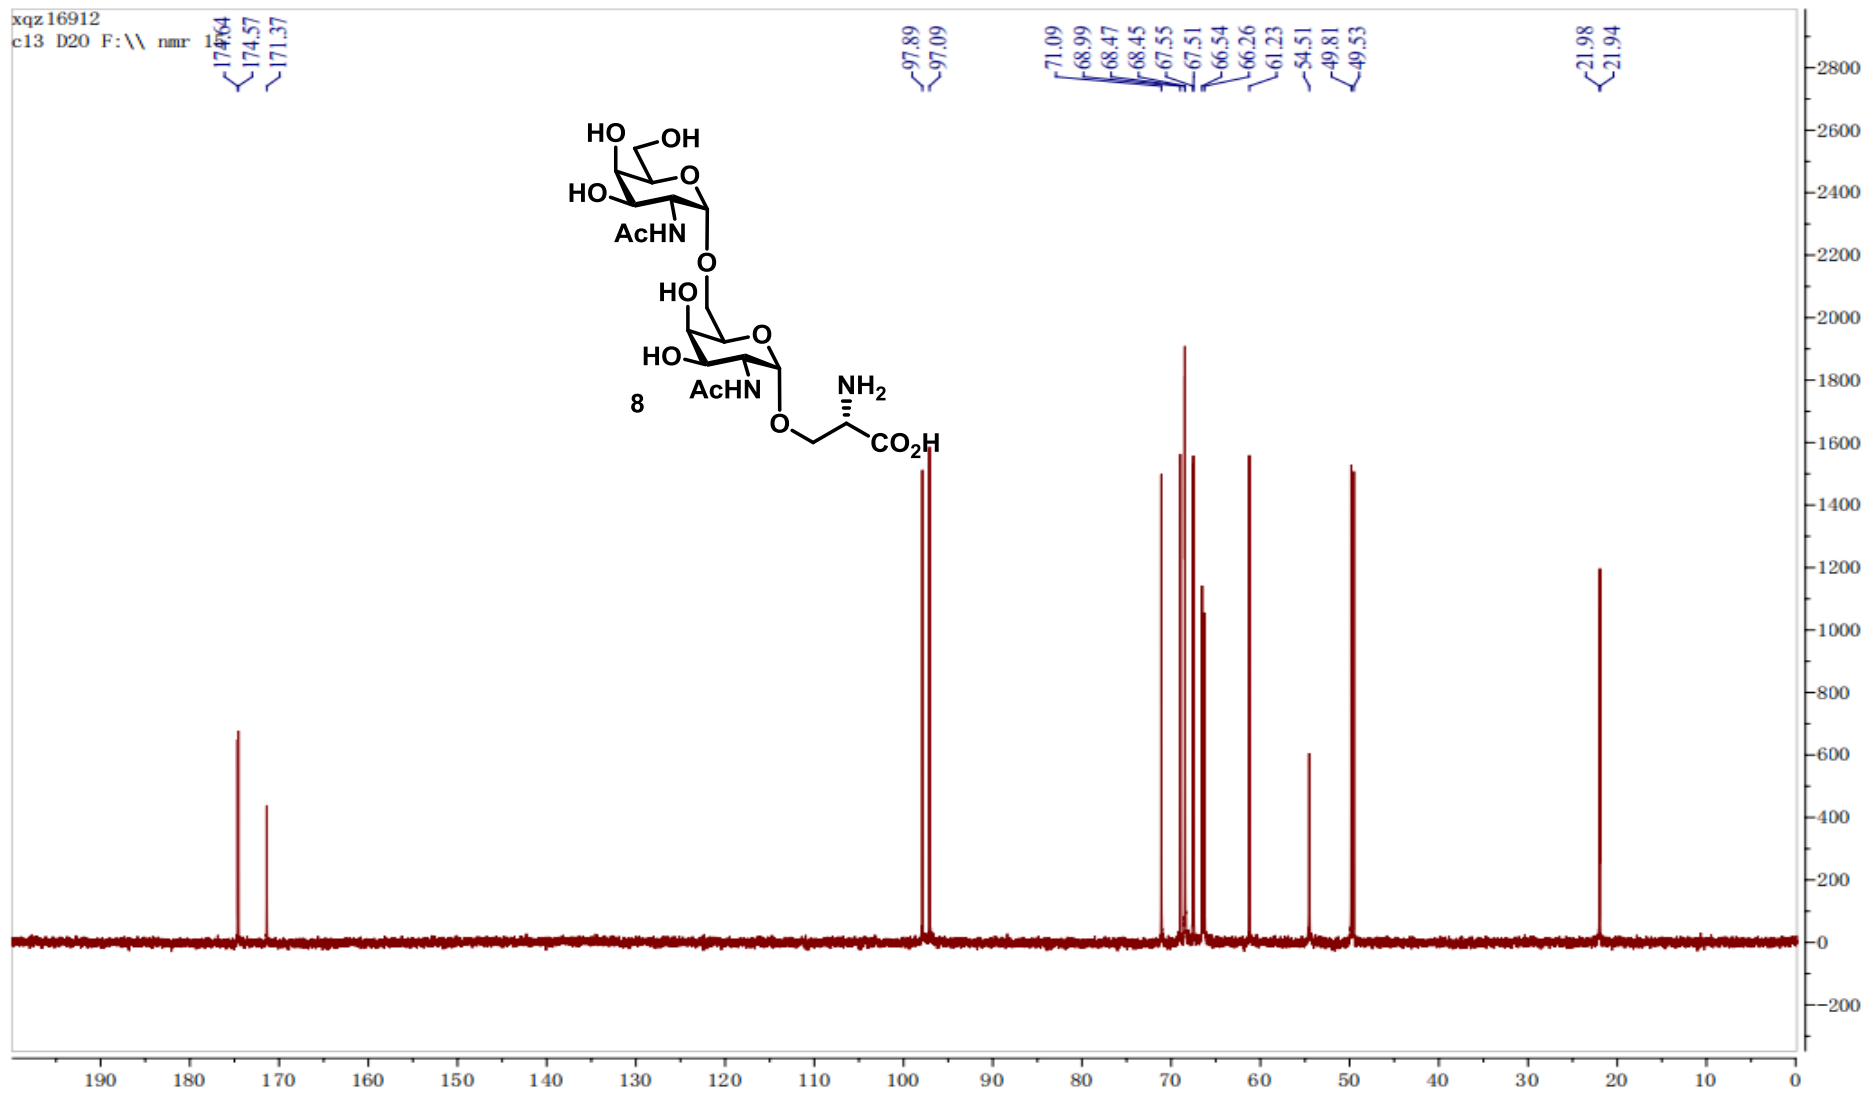

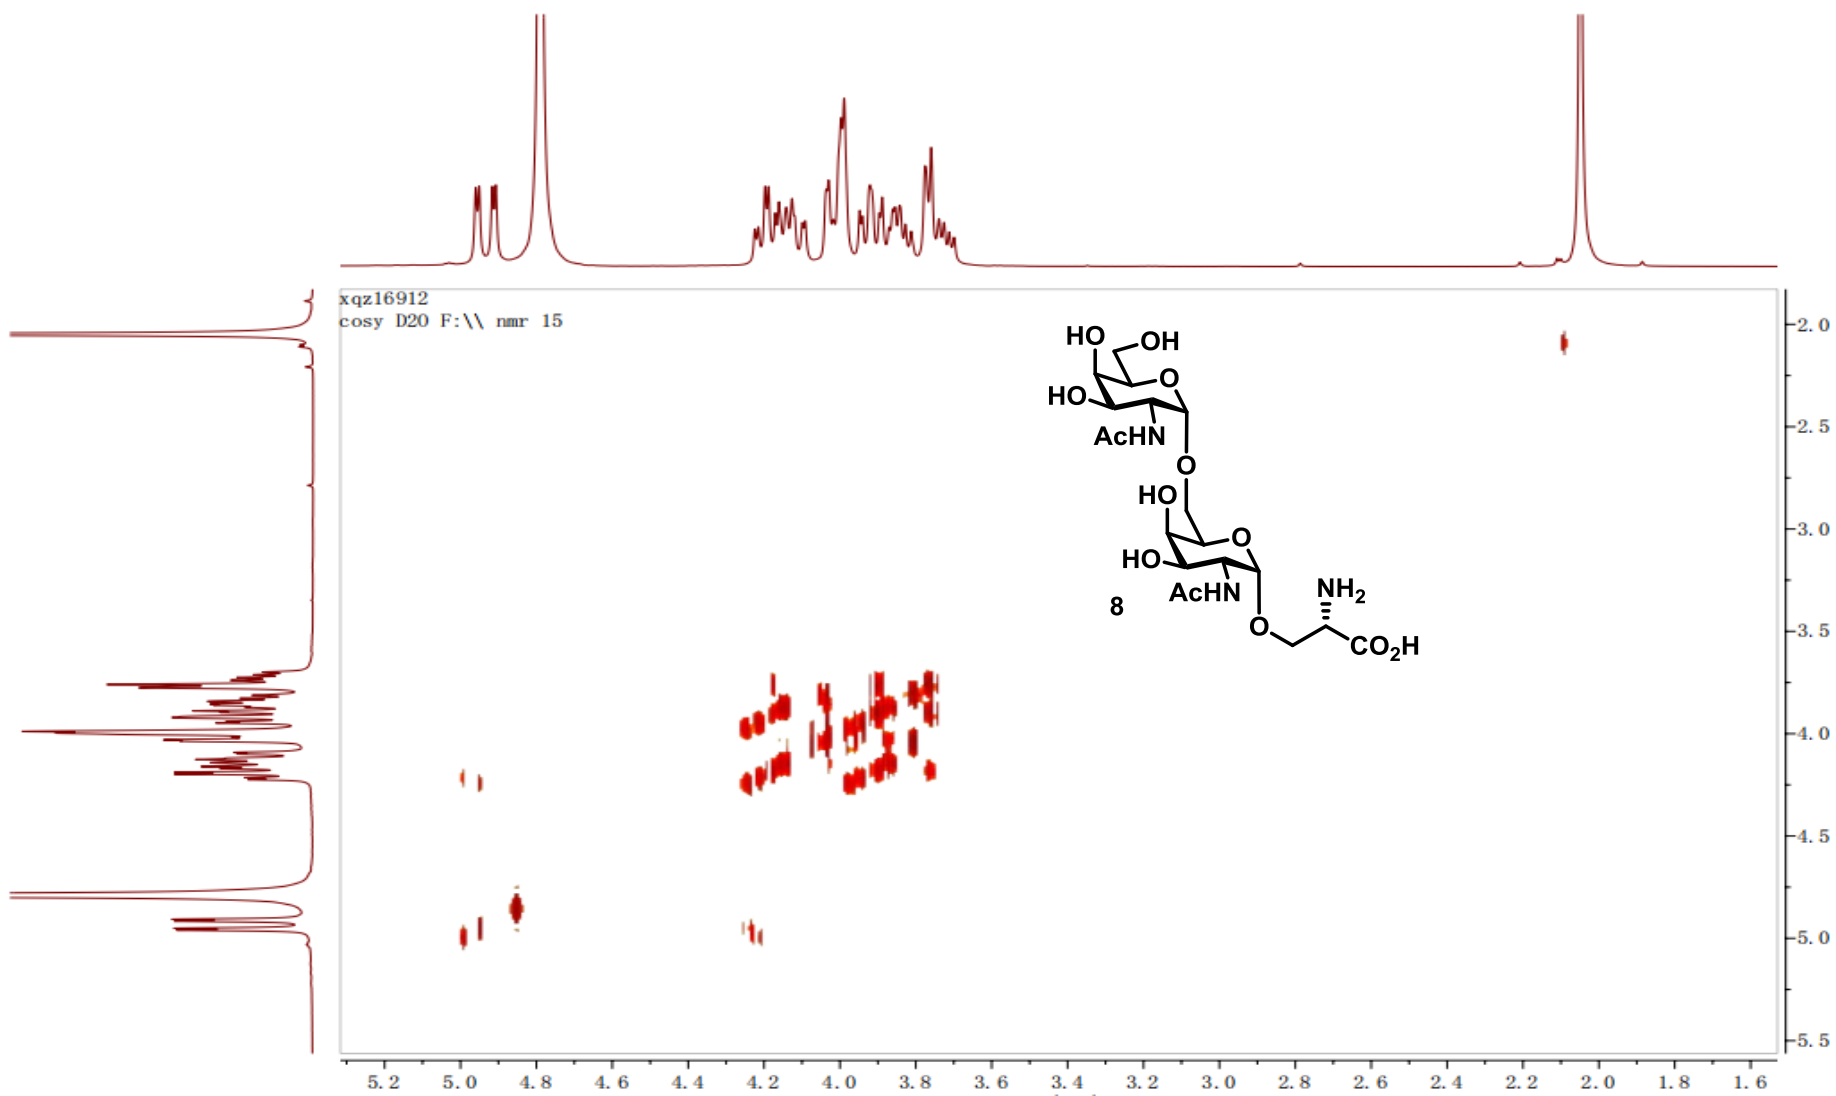

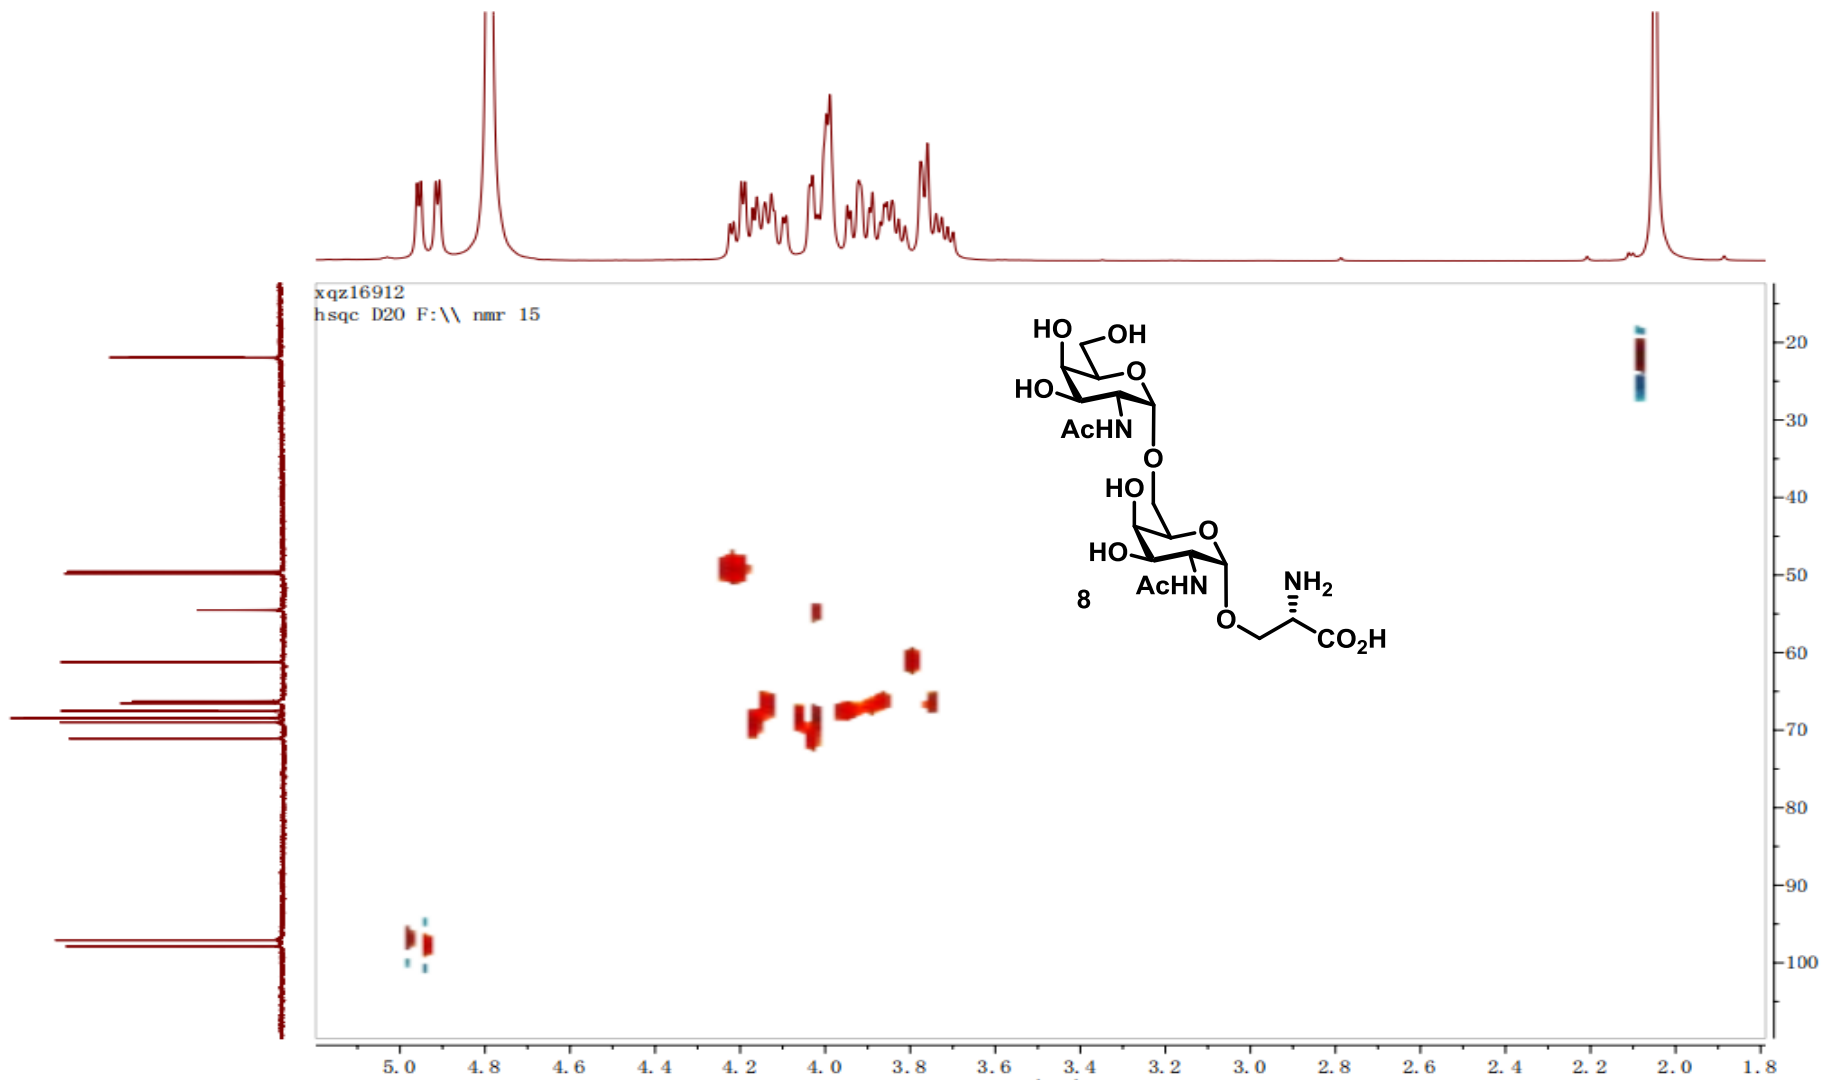

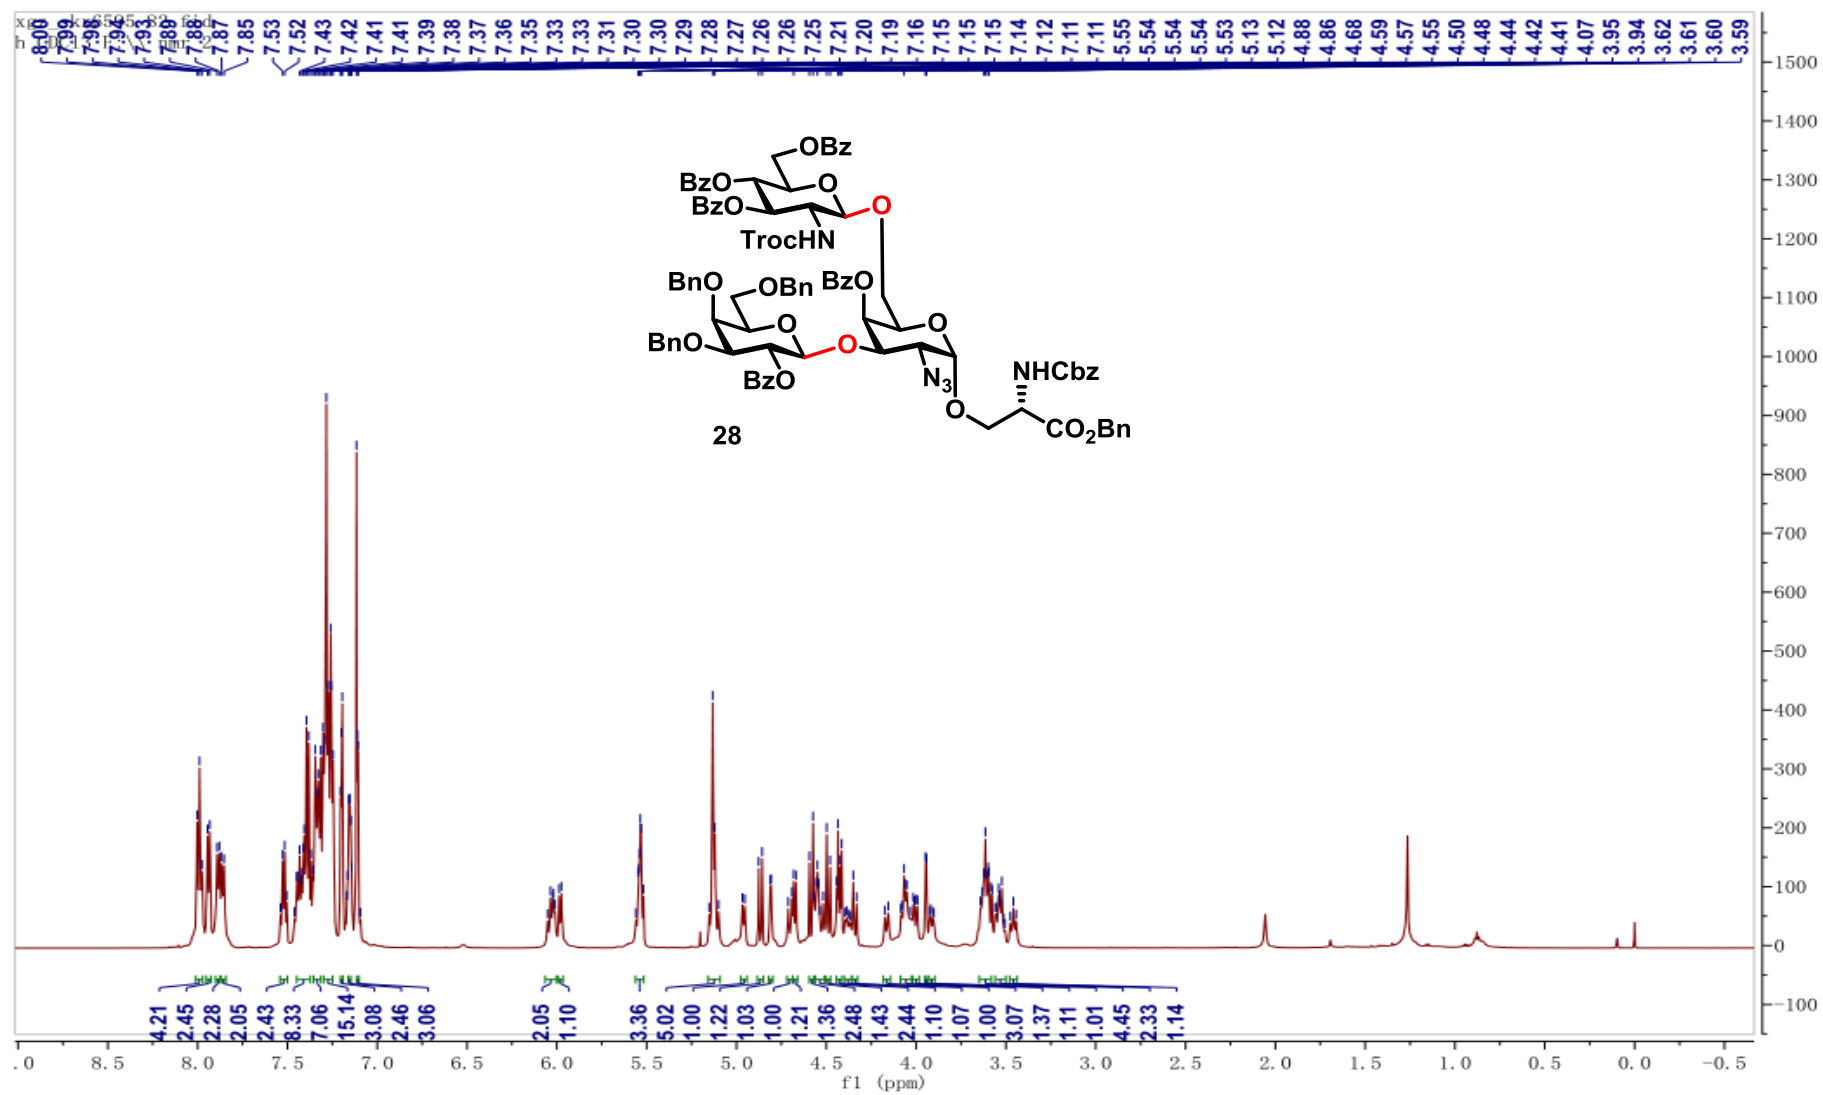

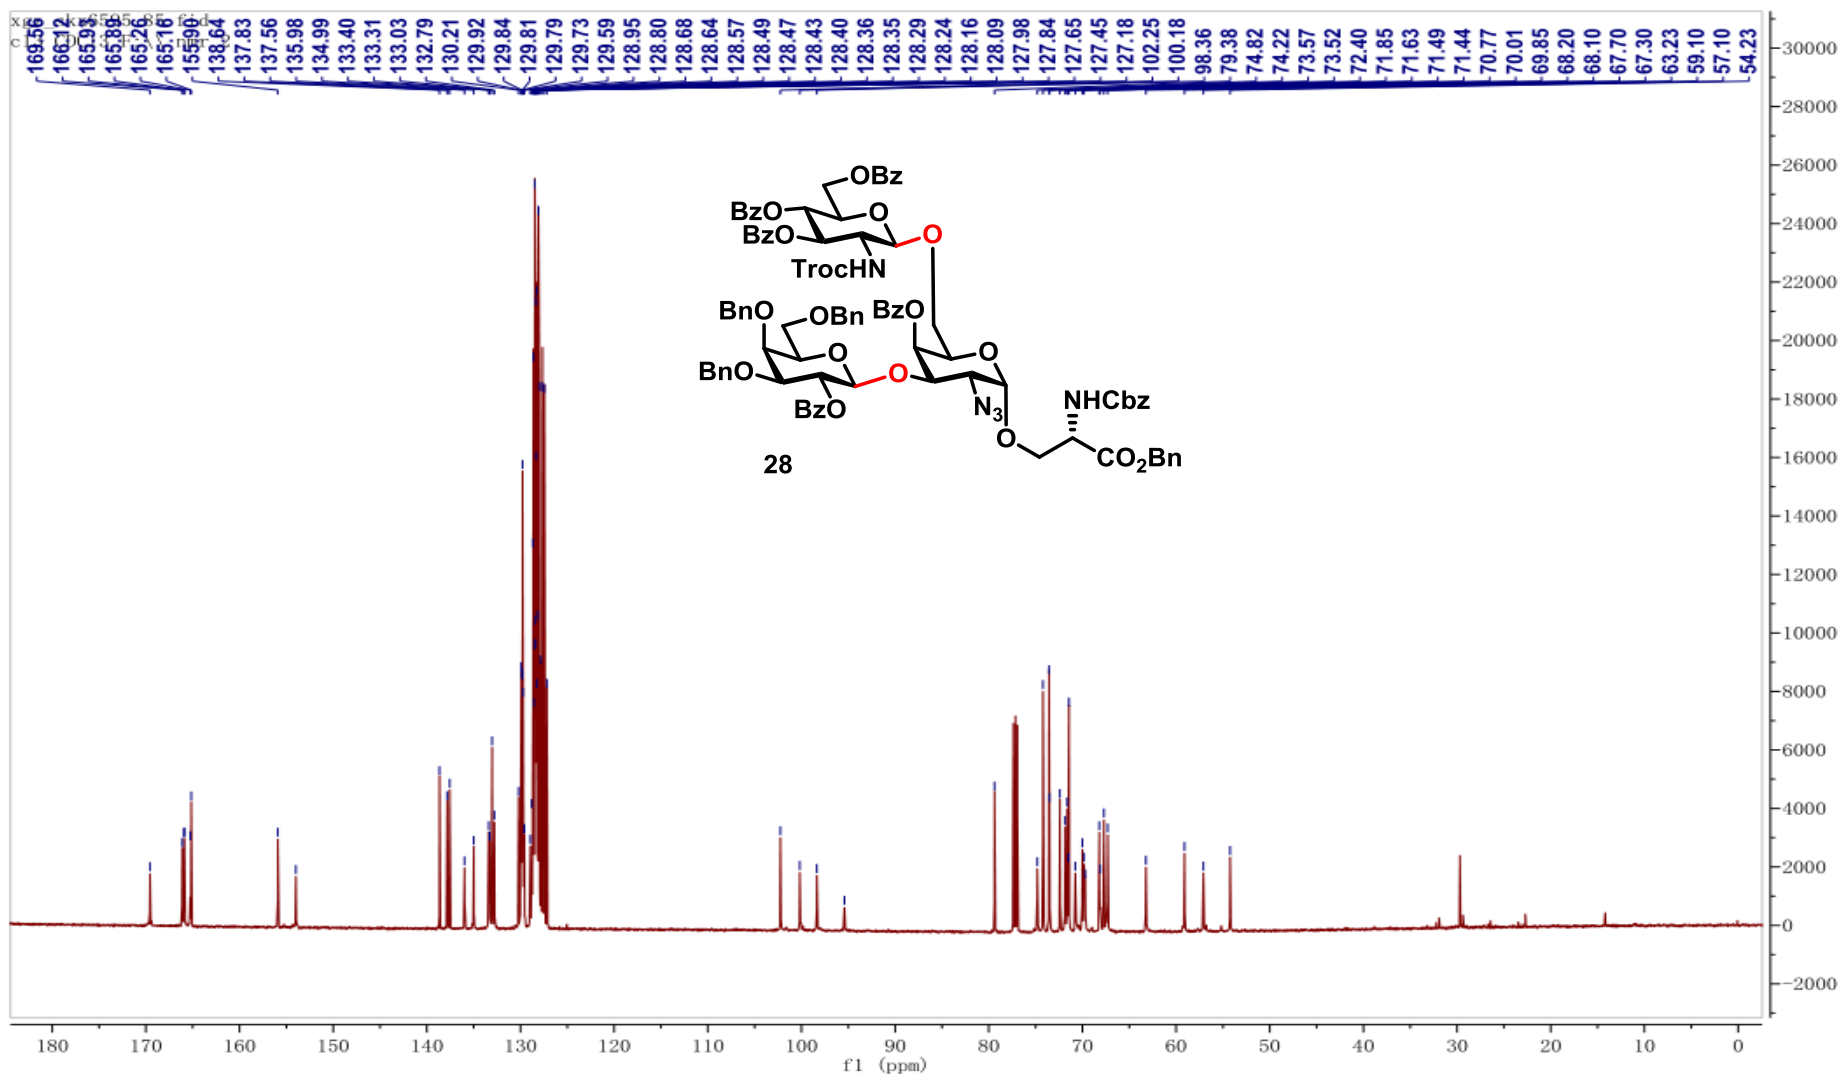

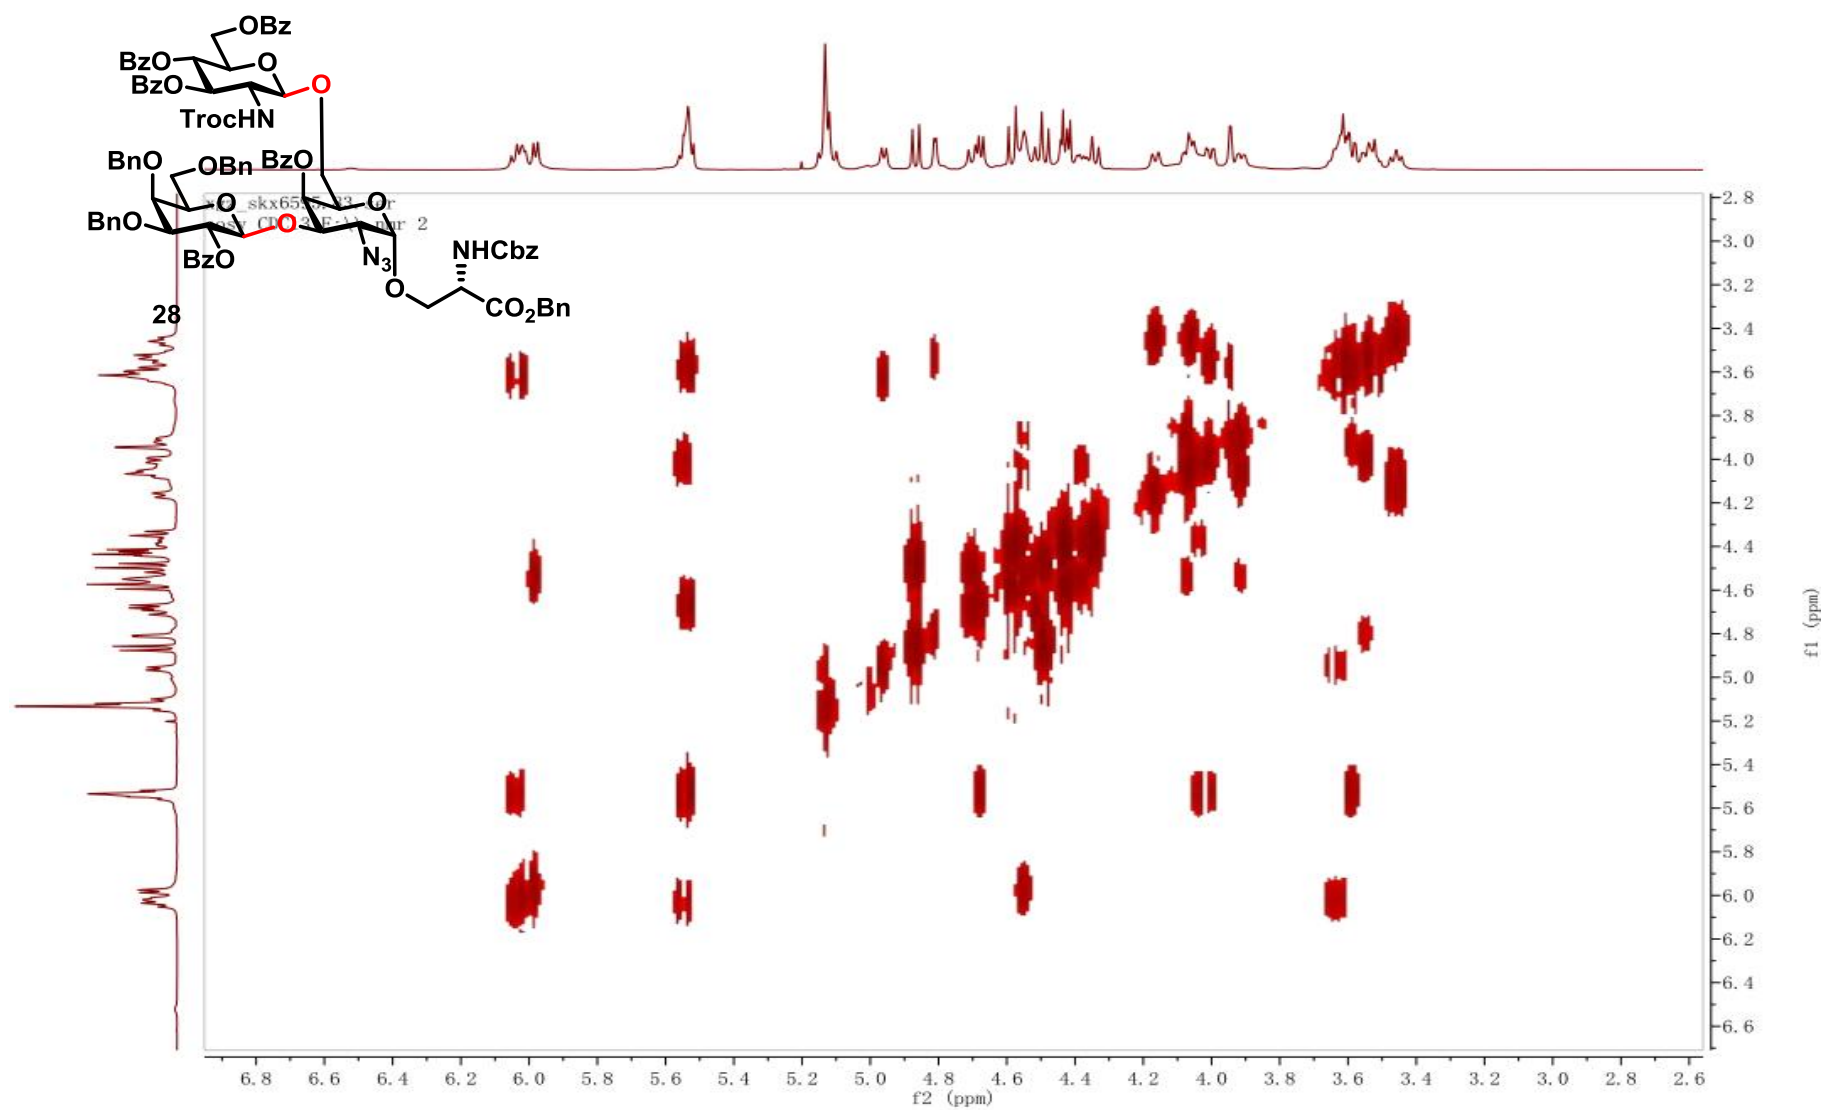

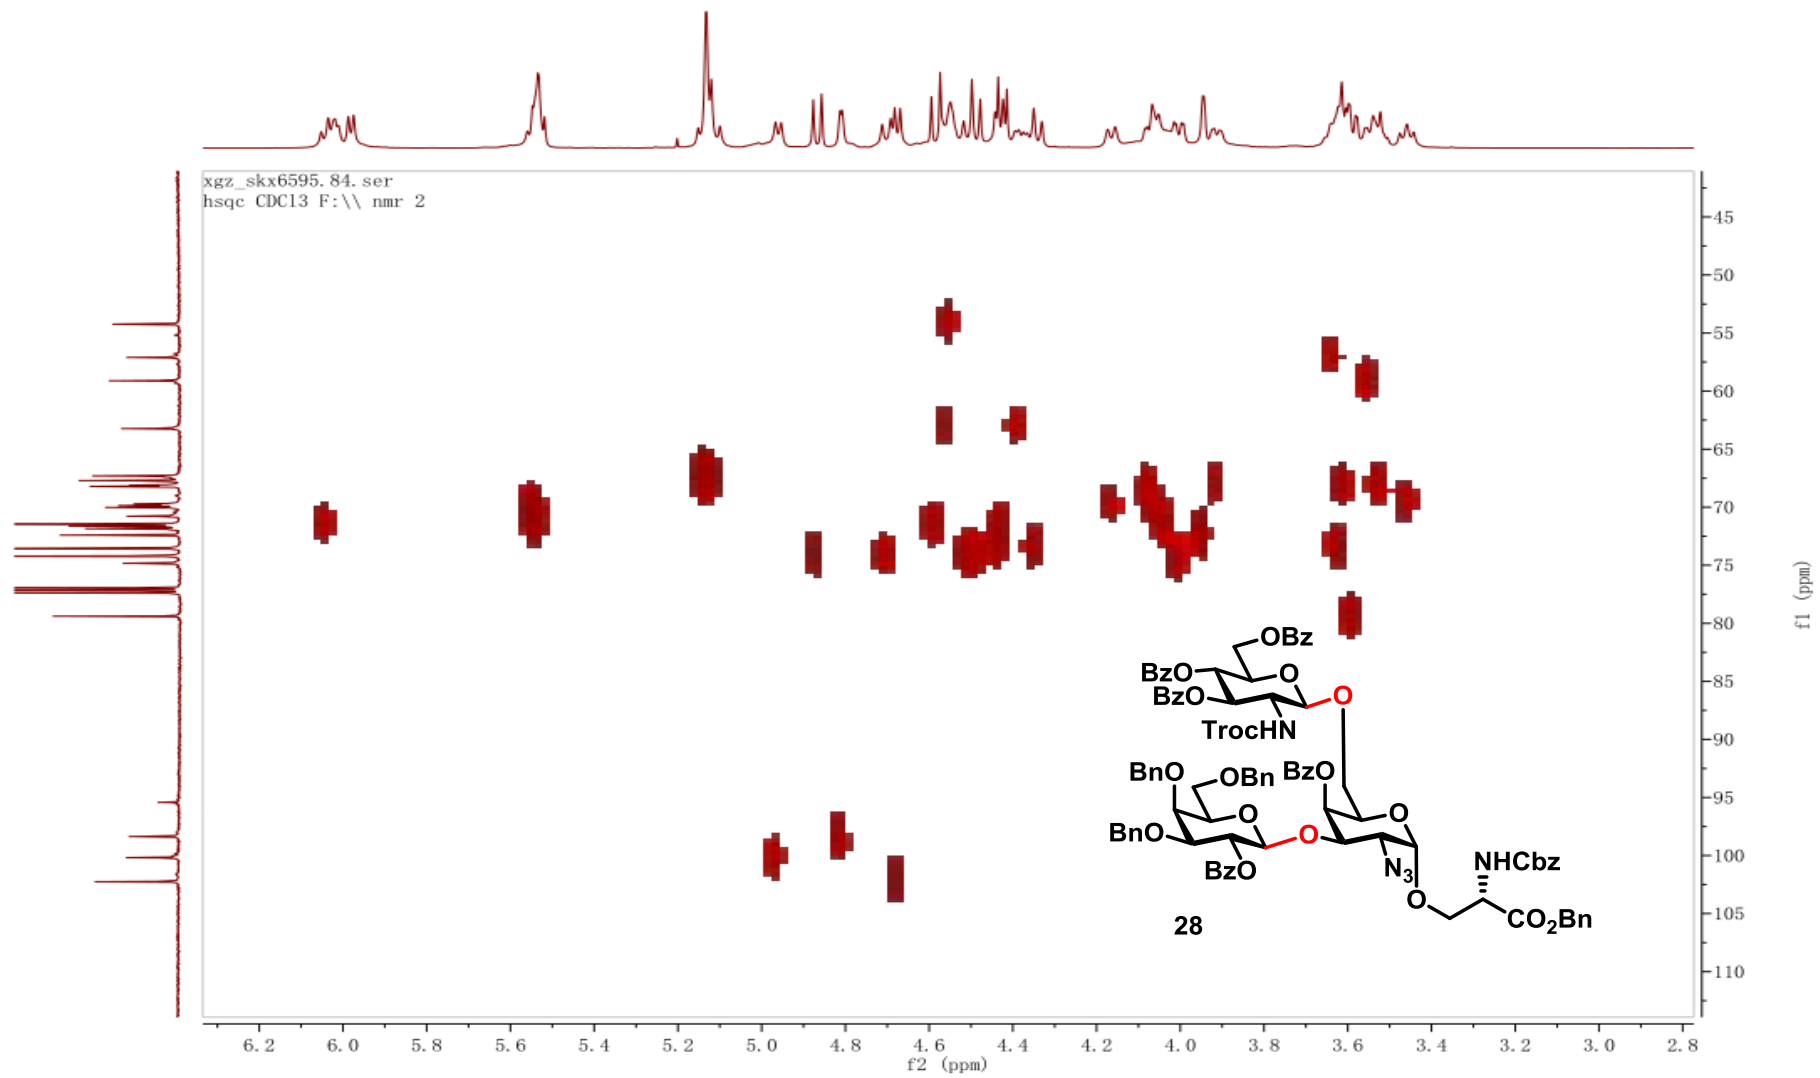

X-QZ-16-105-2A  
X-QZ-16-105-2A  
PROTON D2O E:\ xiaoguozi 19

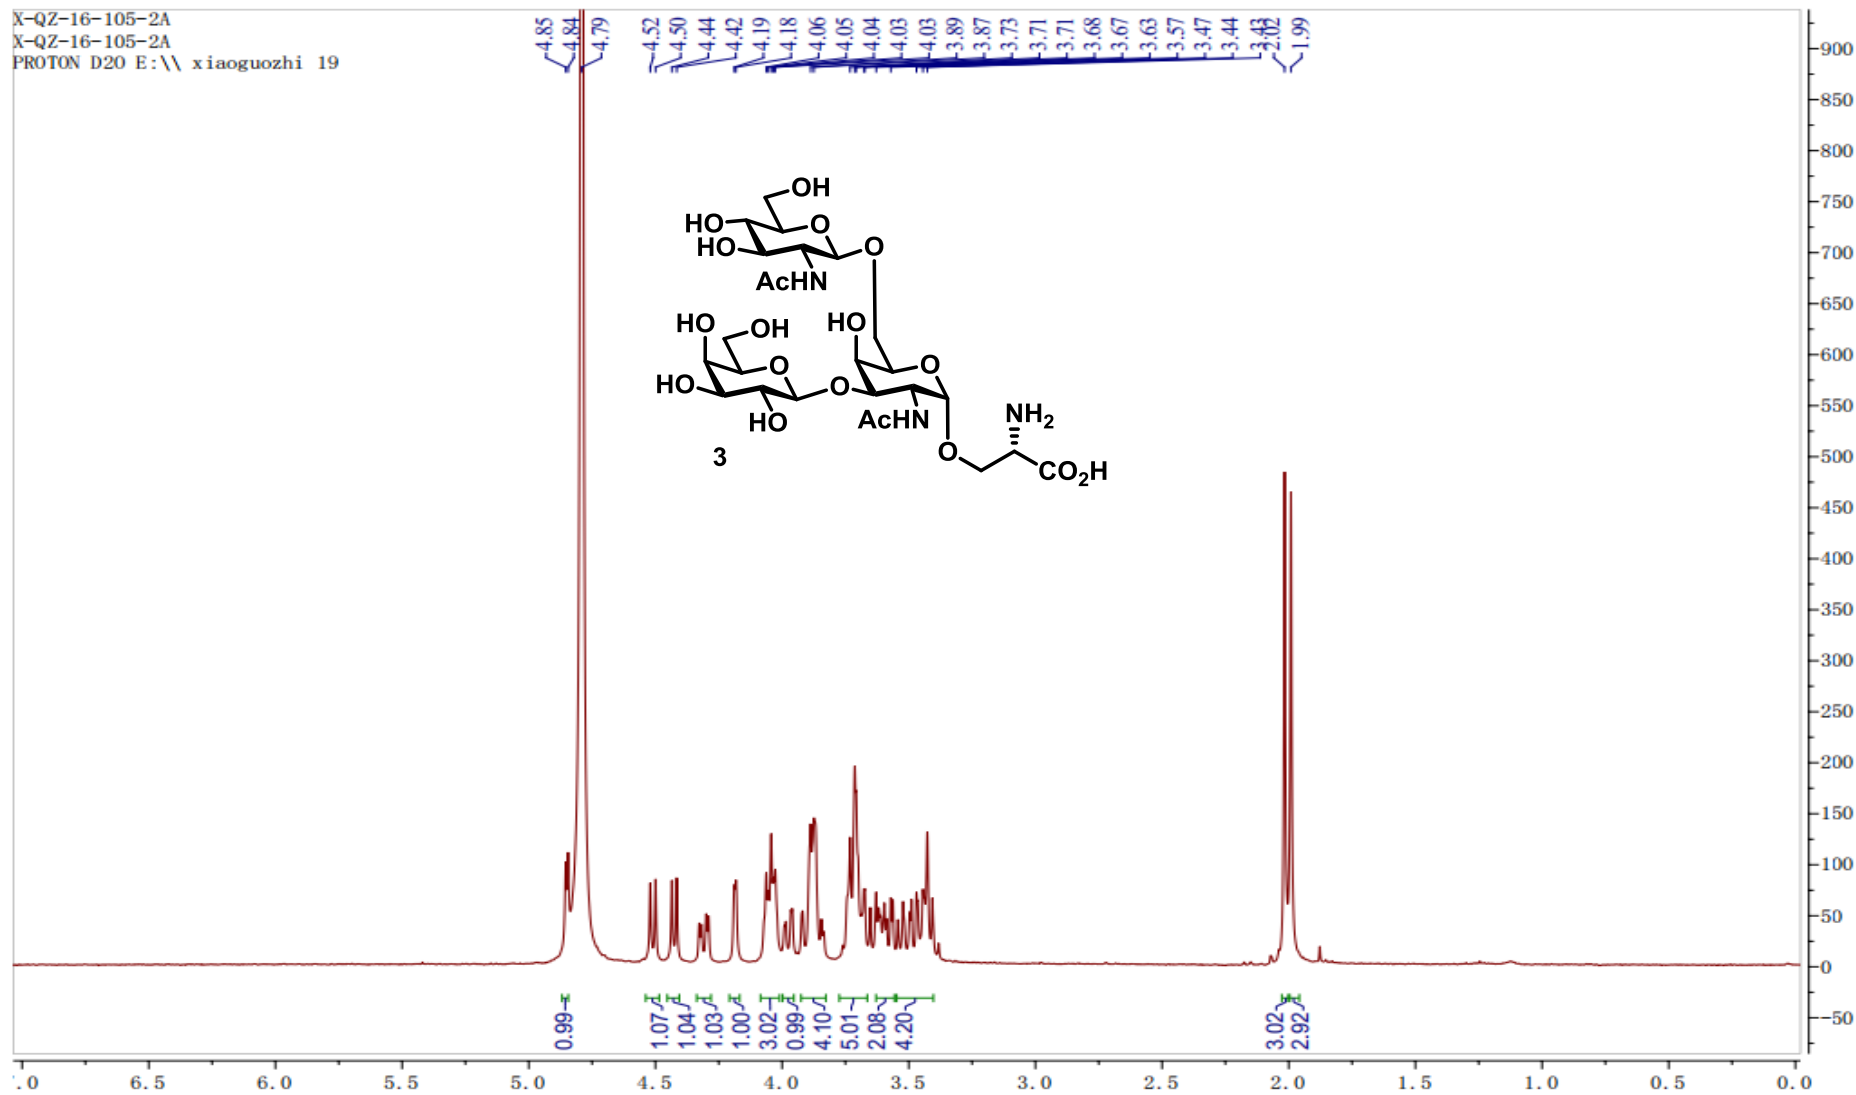



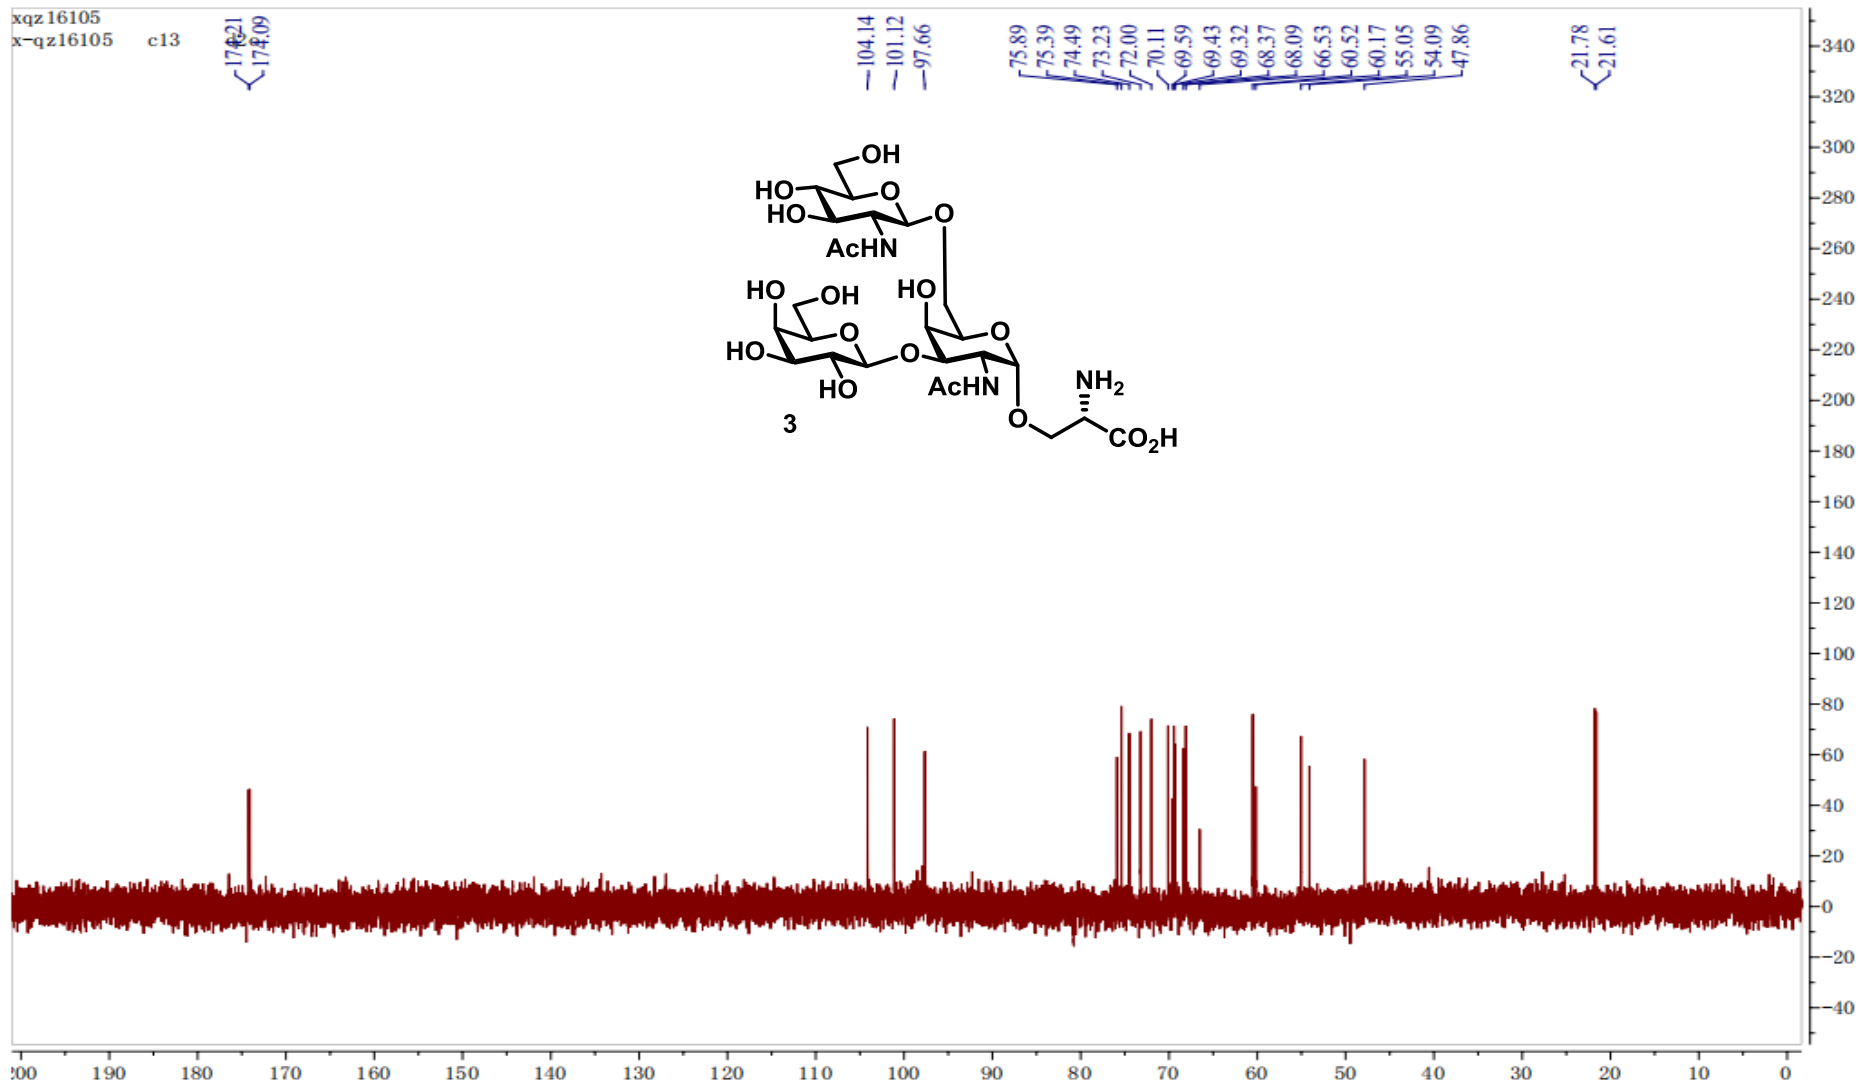

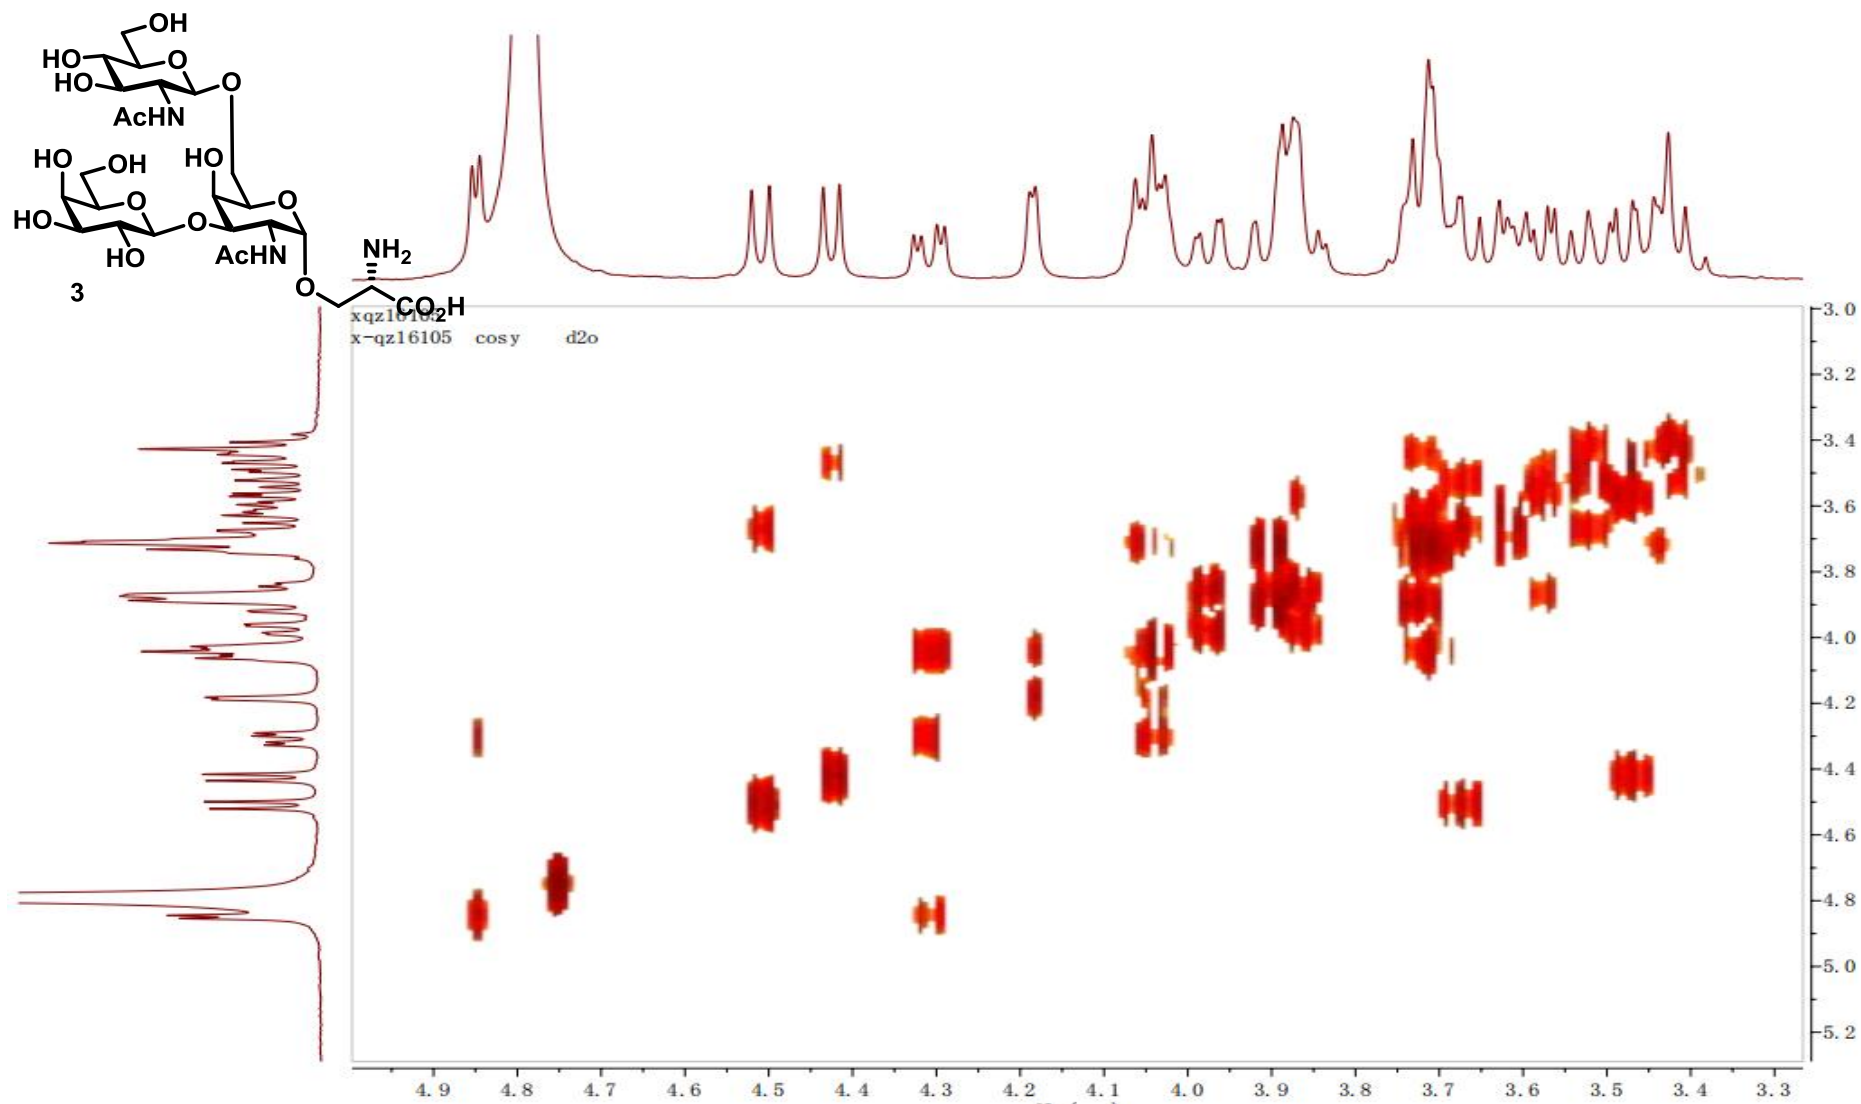

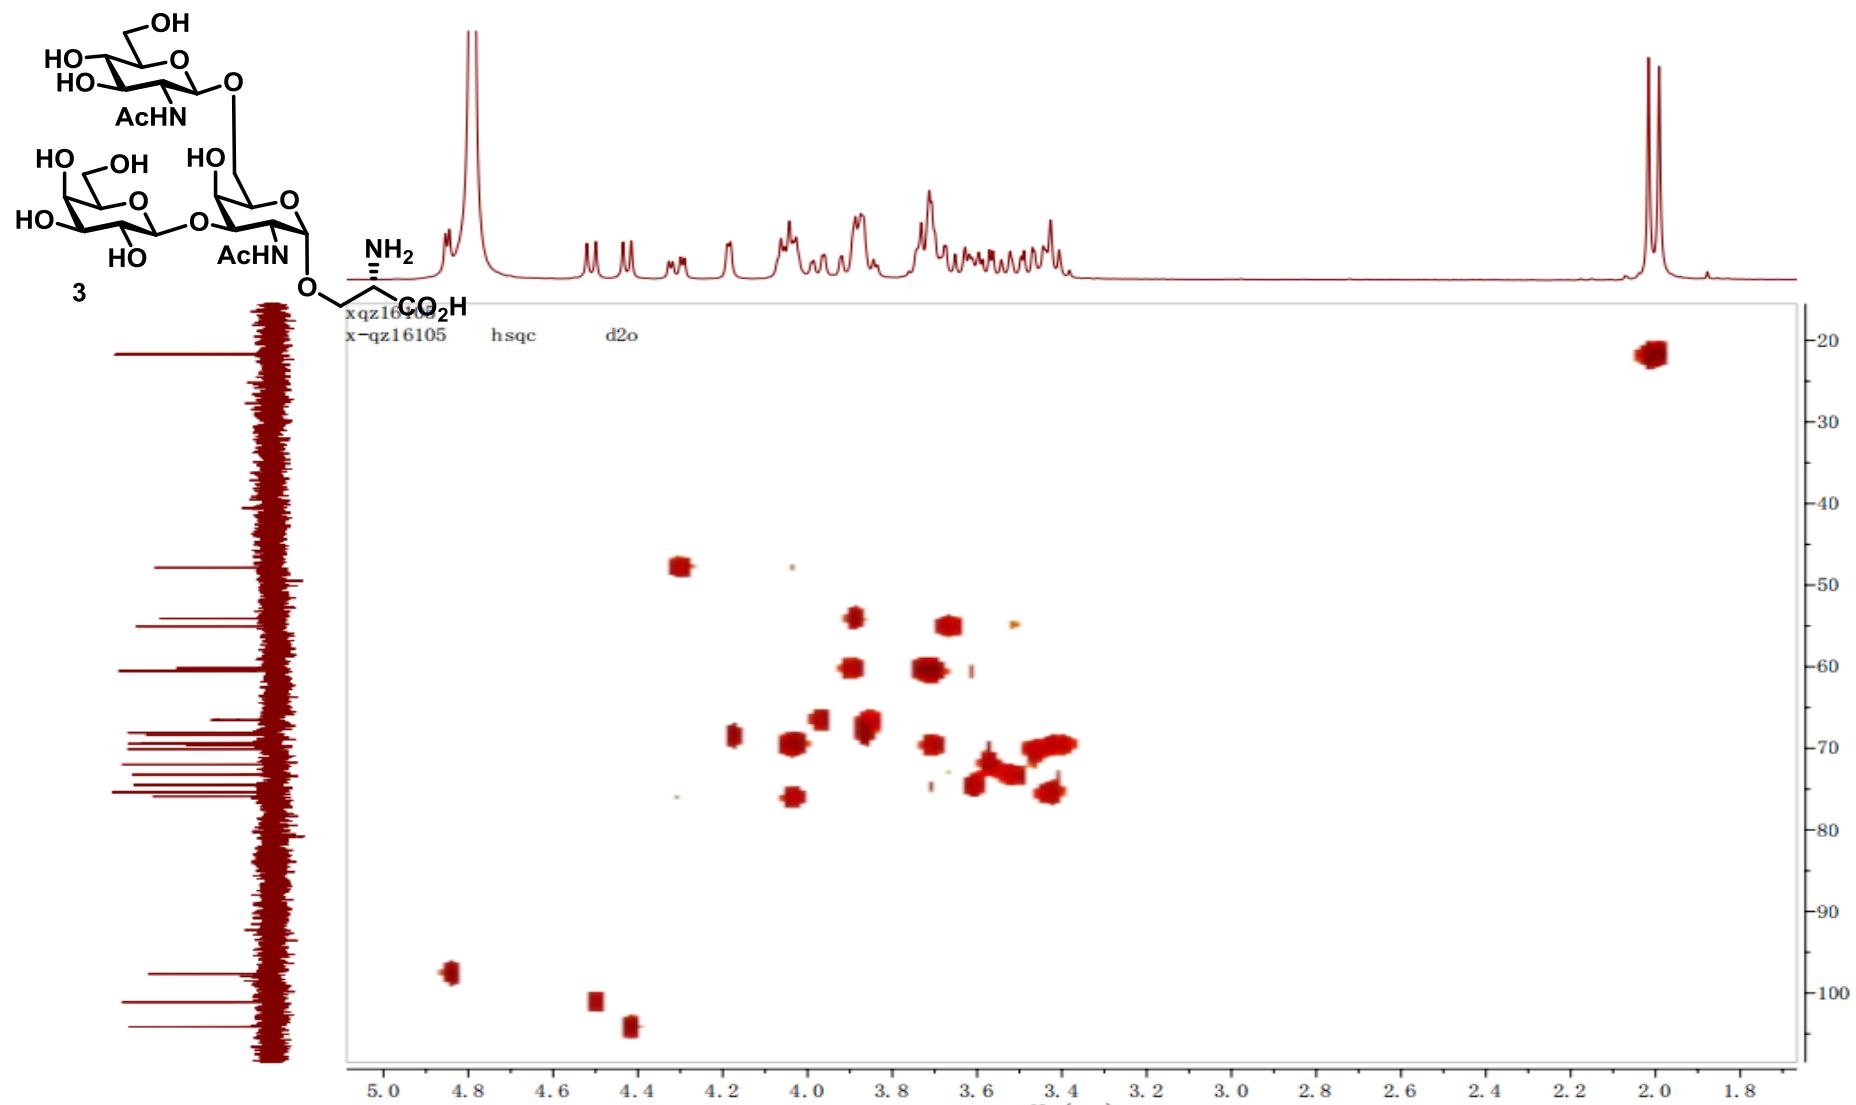

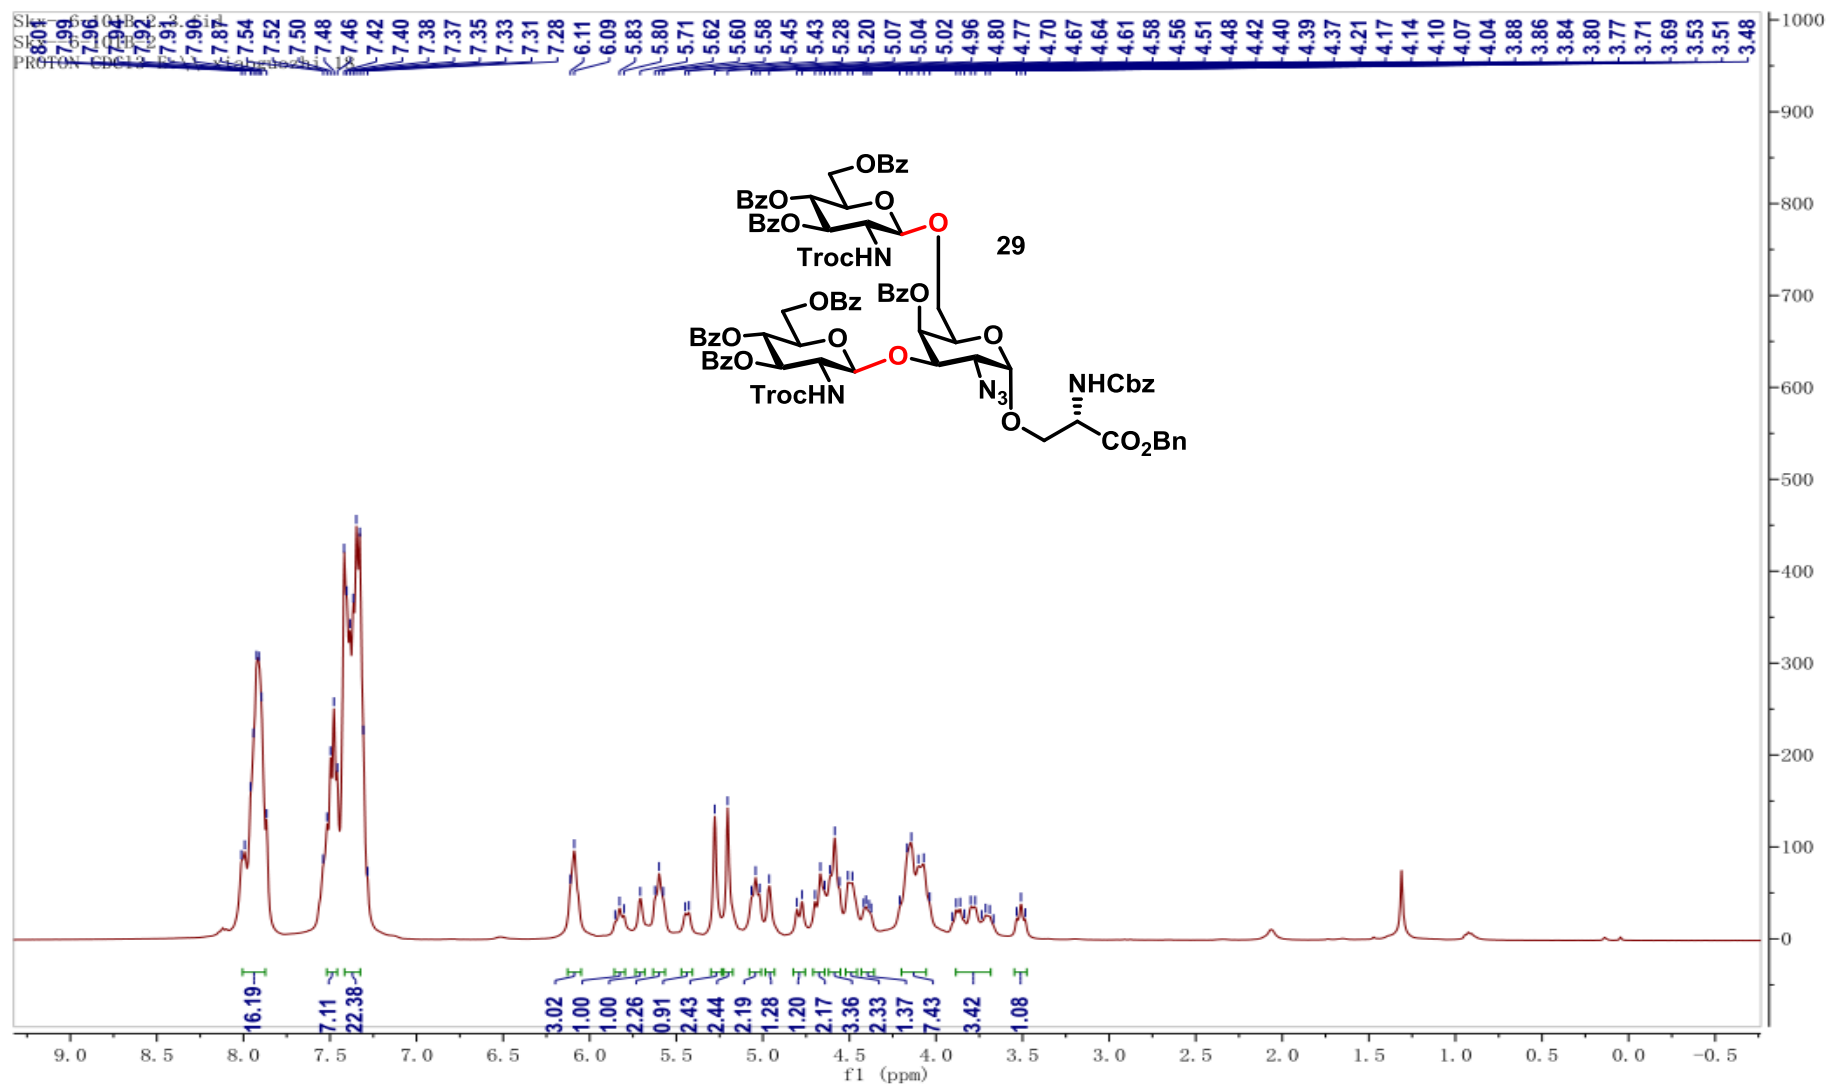

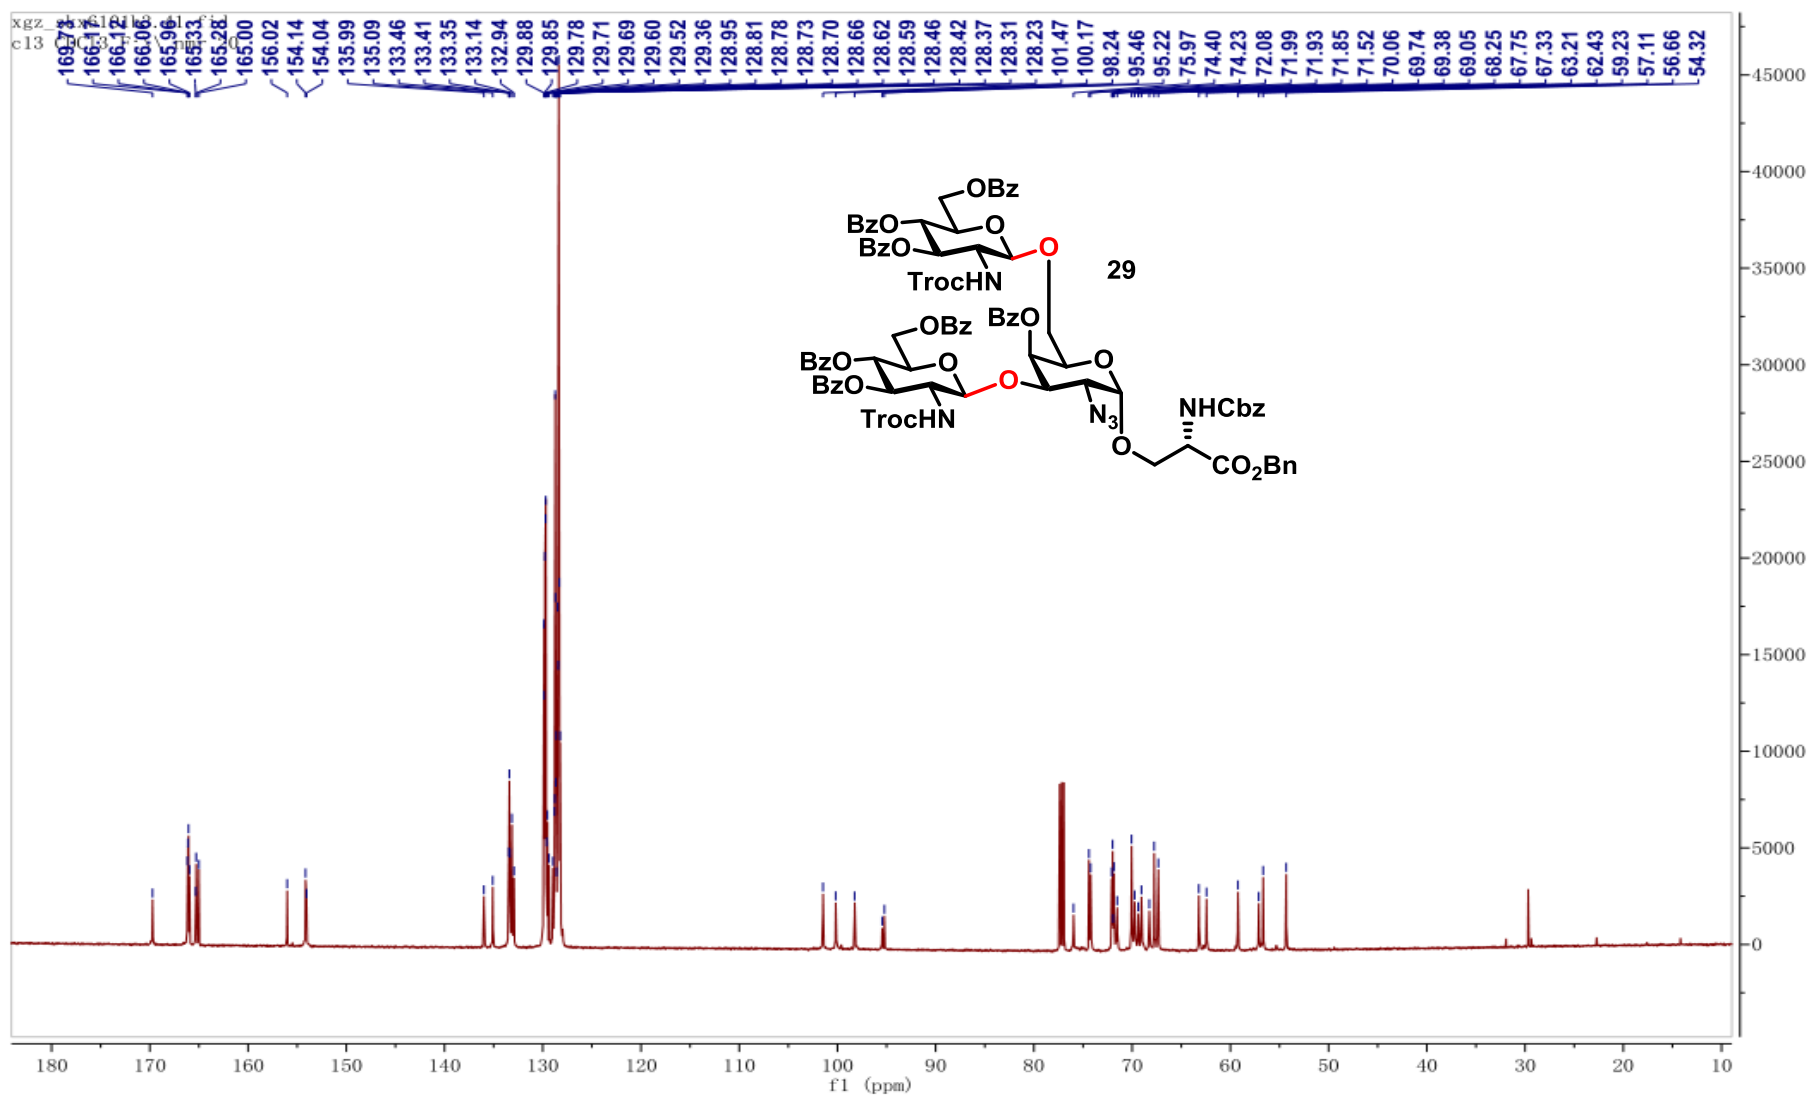

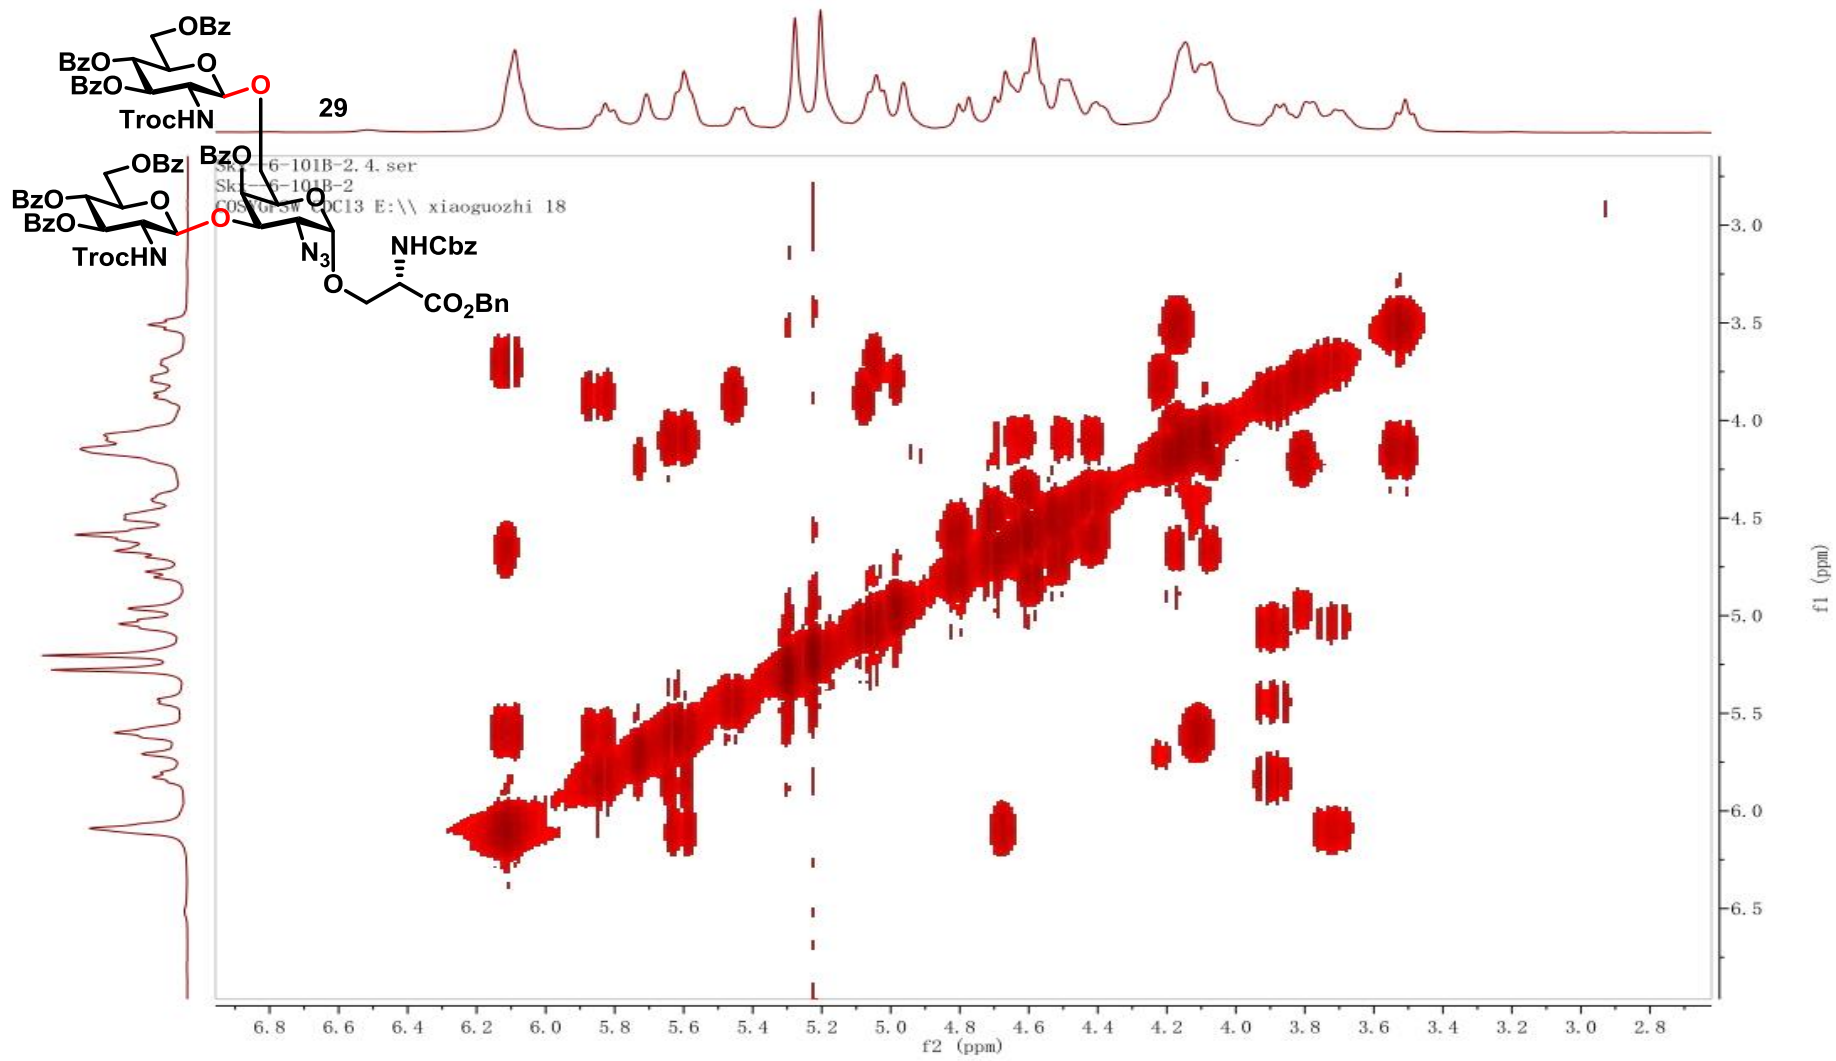

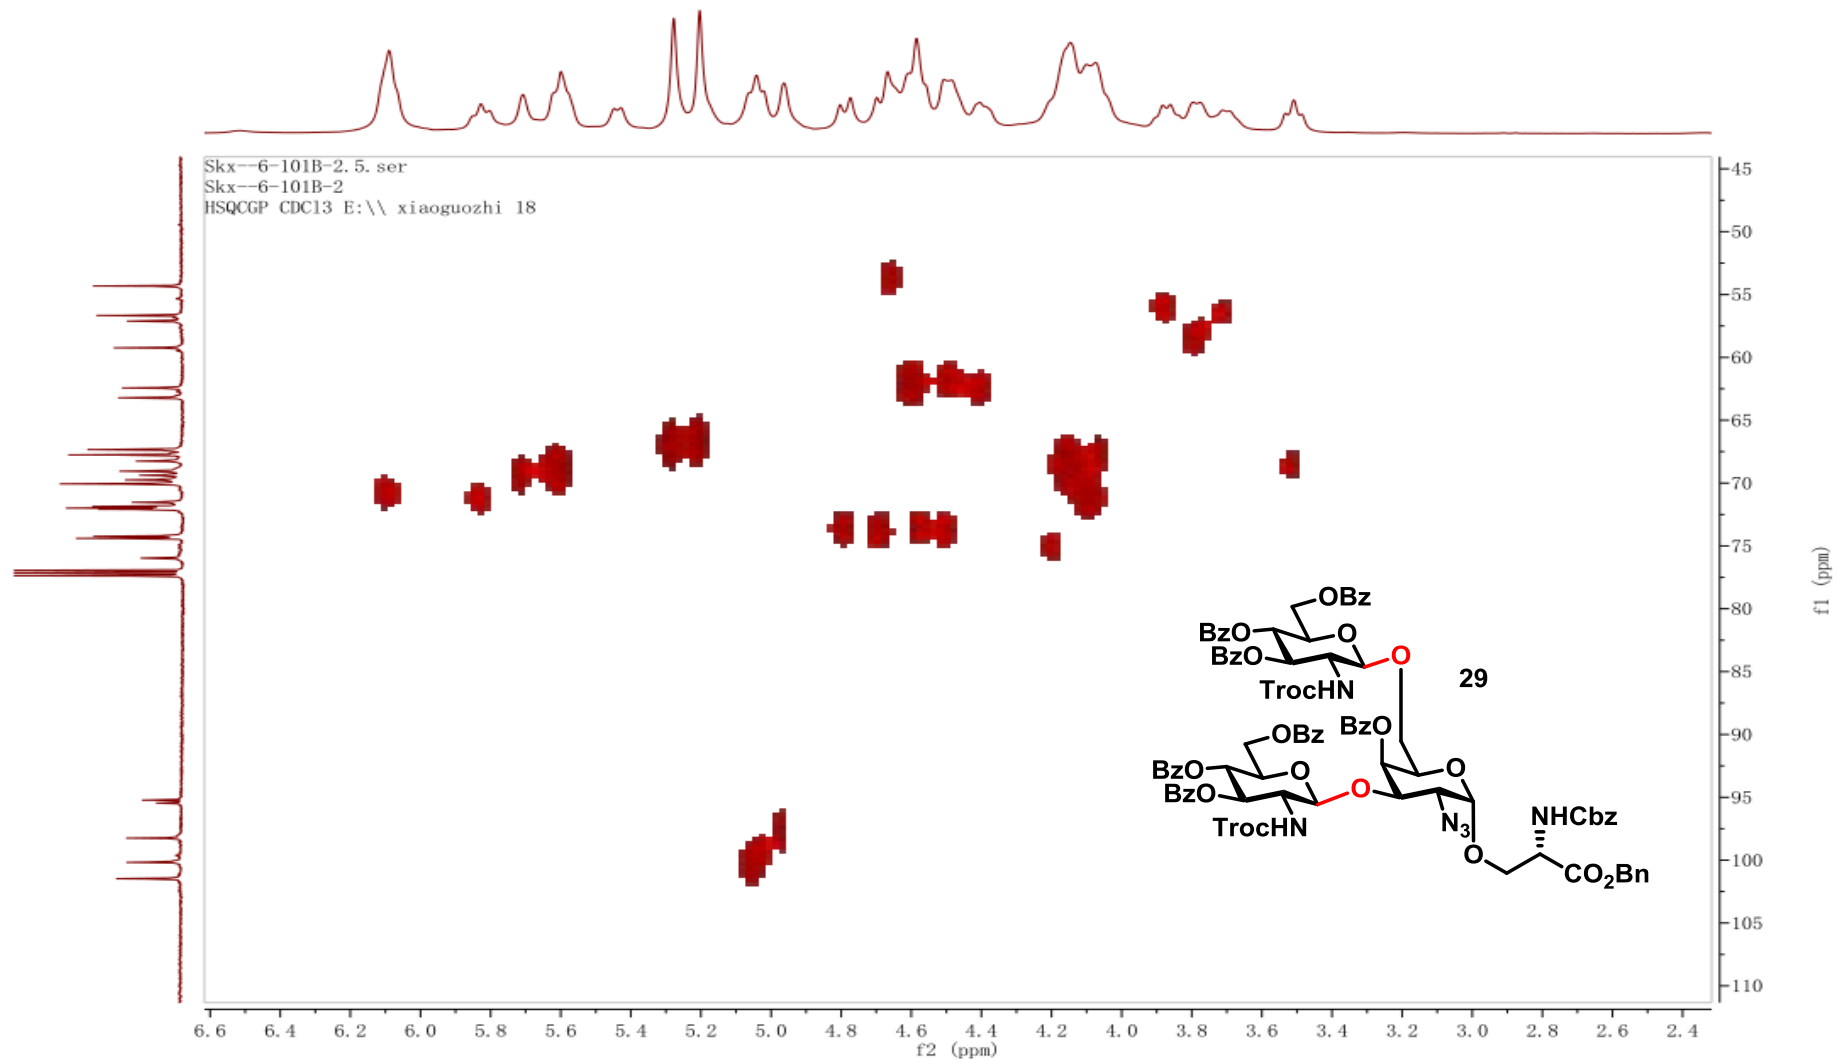

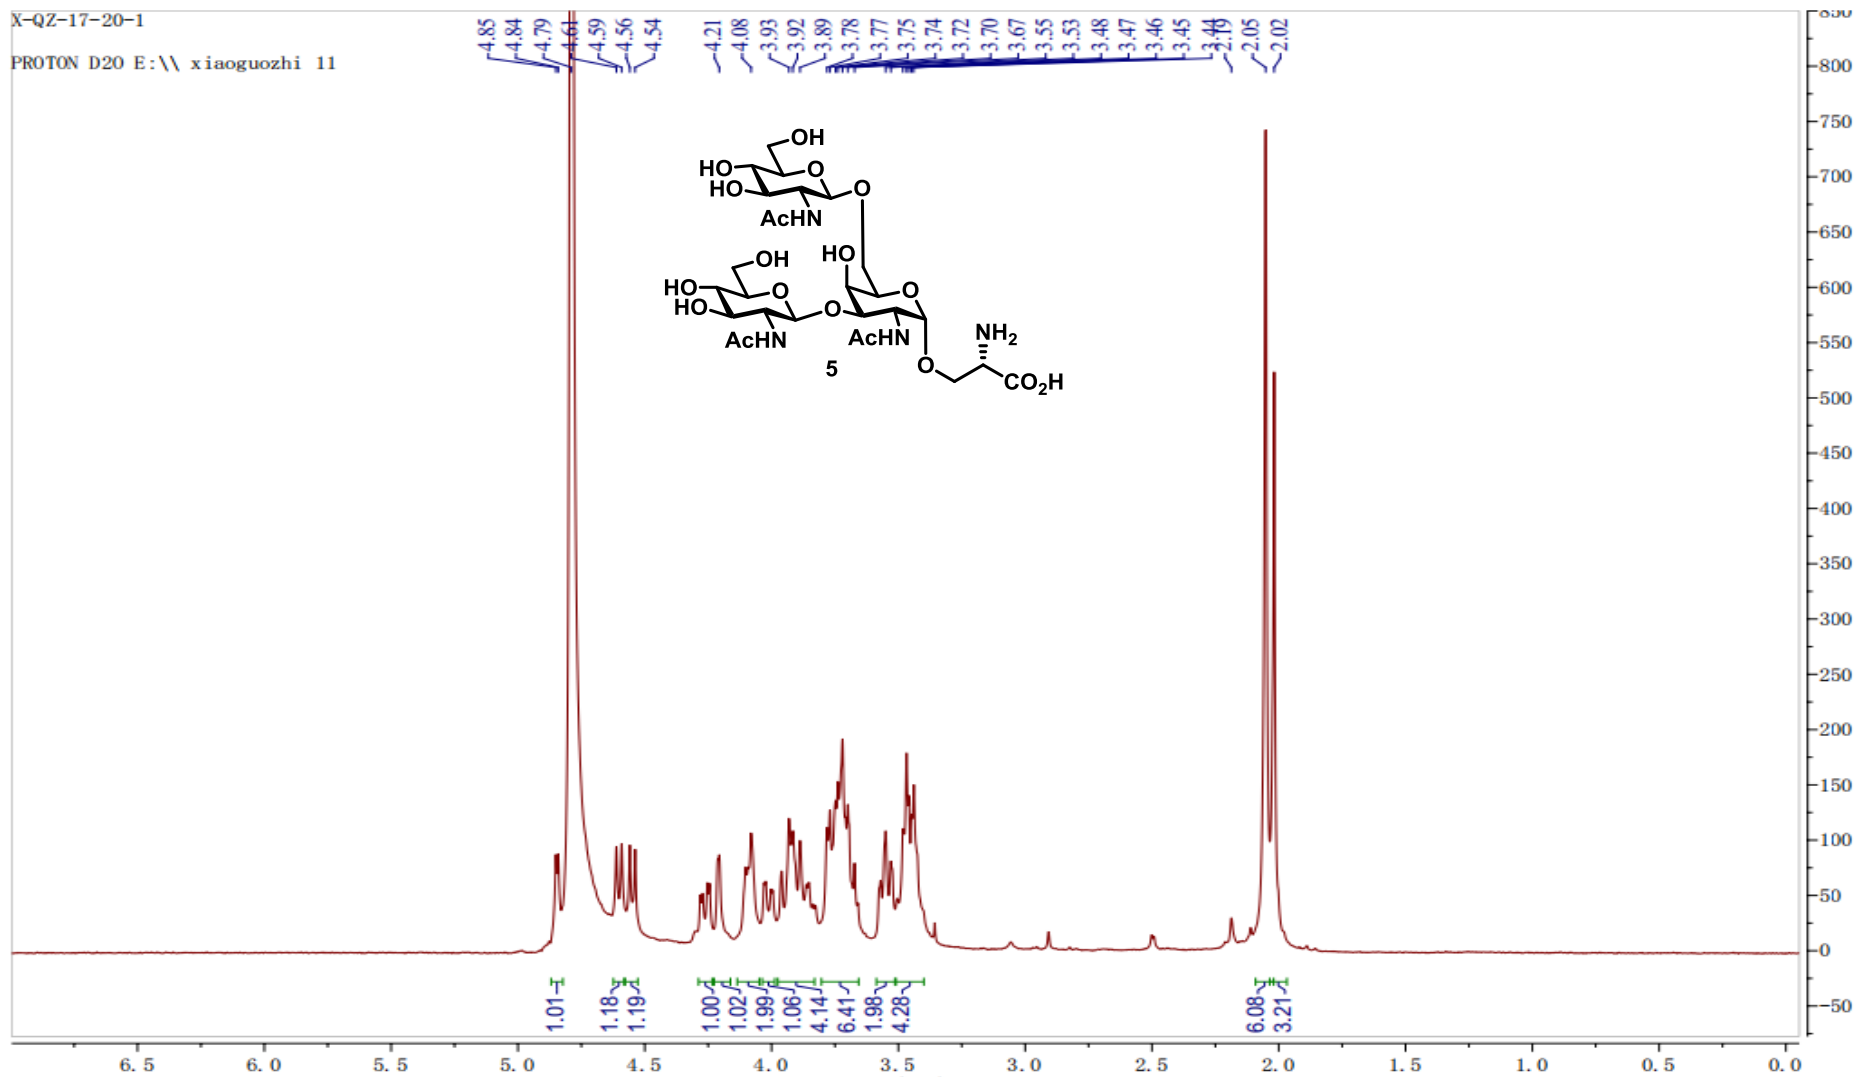



xqz 17201  
c13 D2O F:\ nmr 19

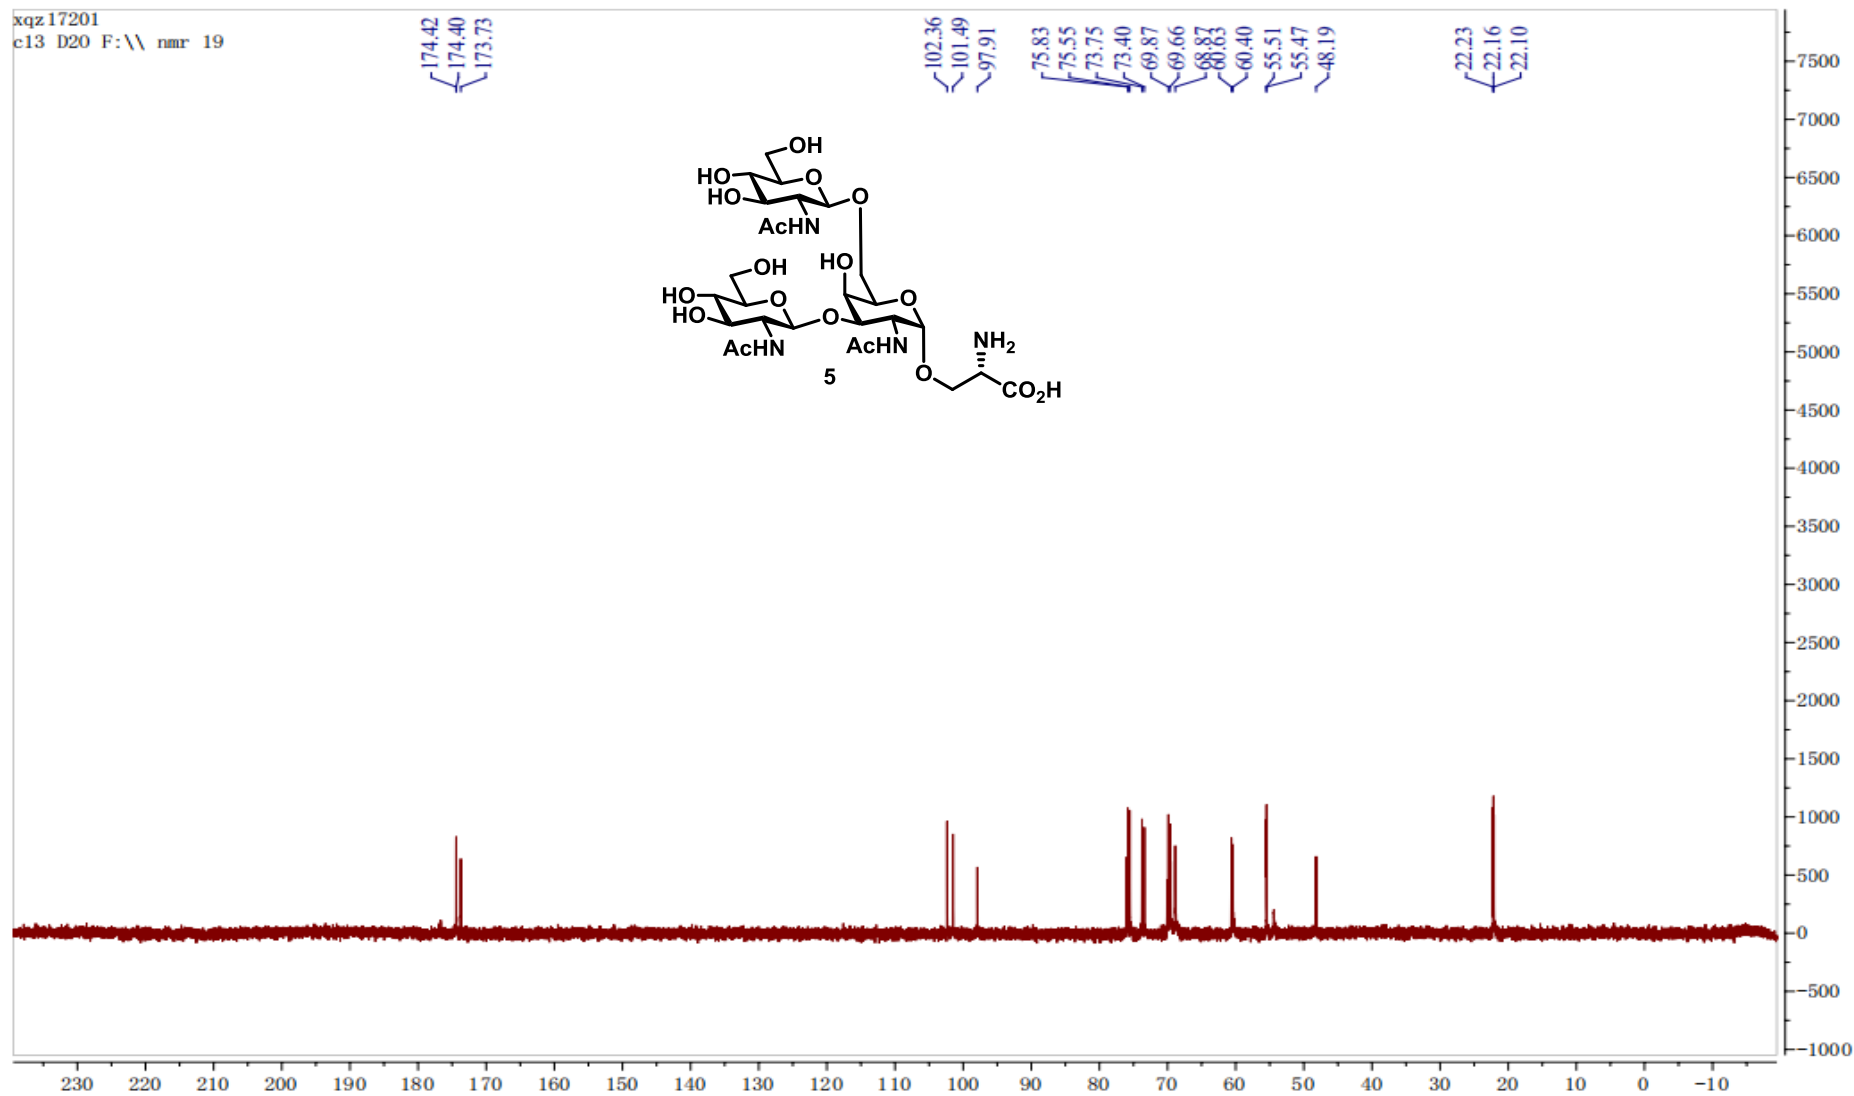

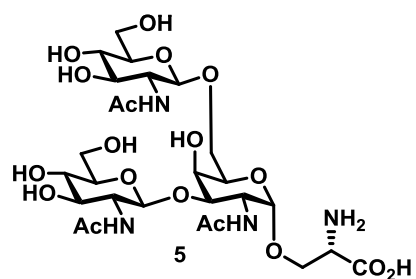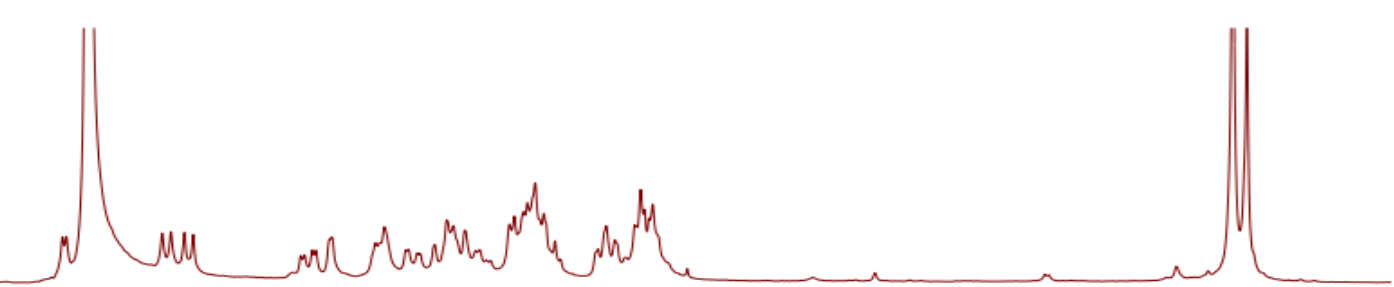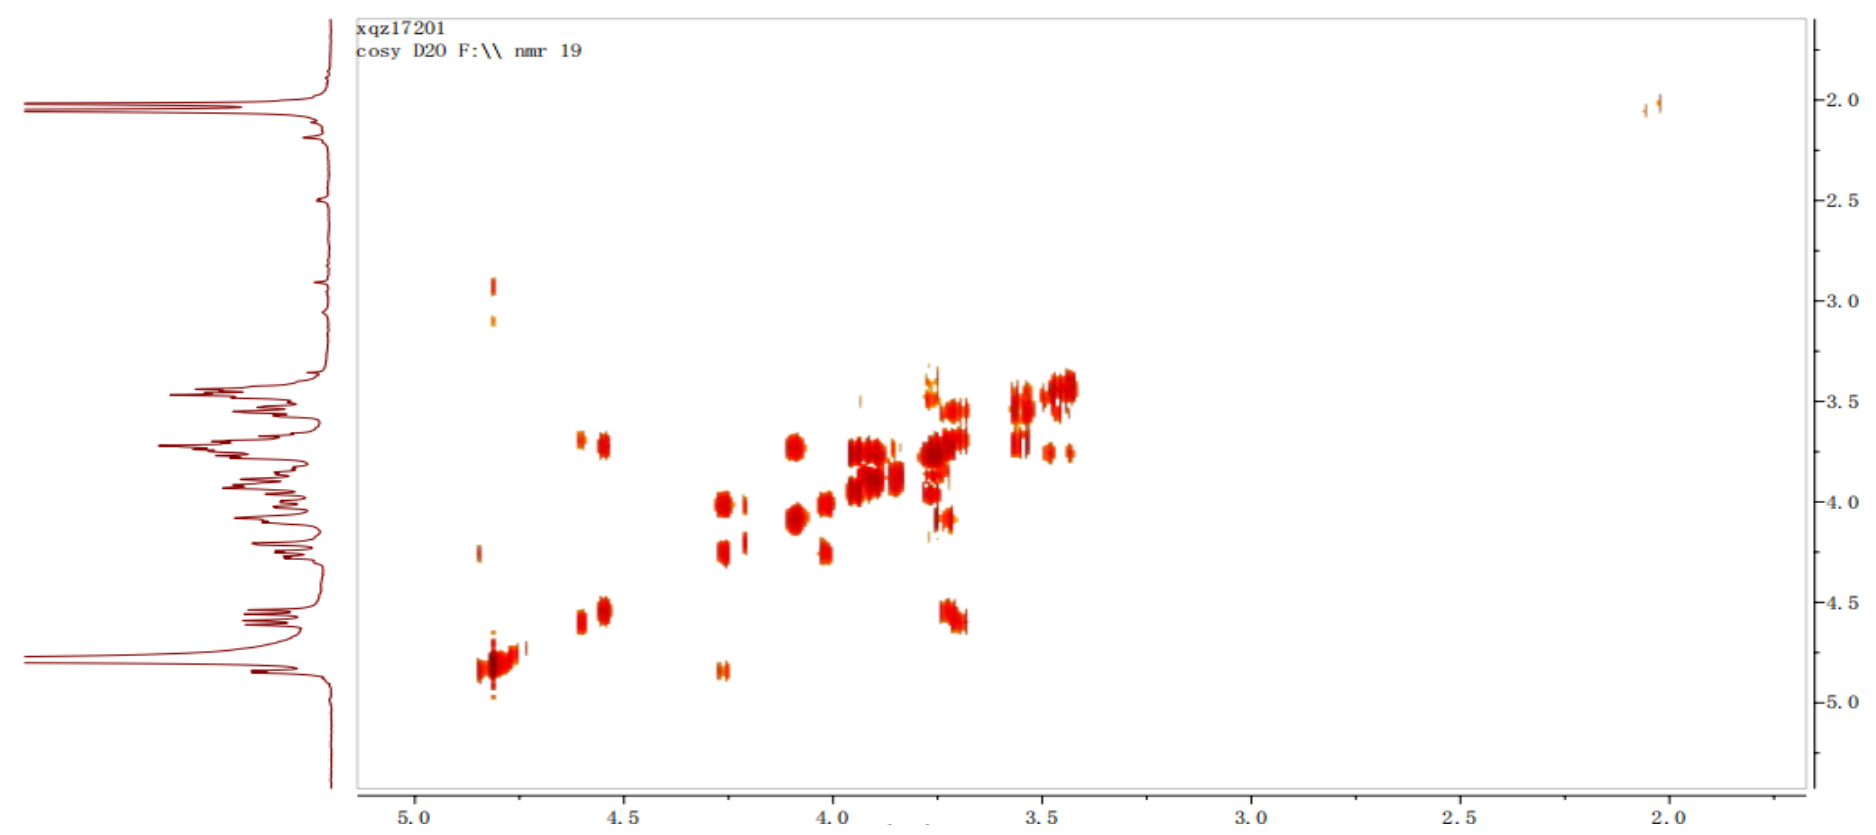

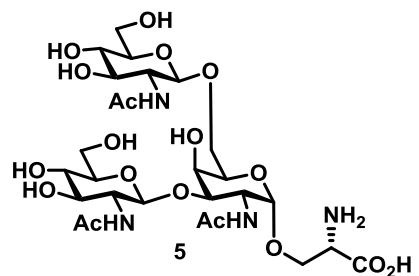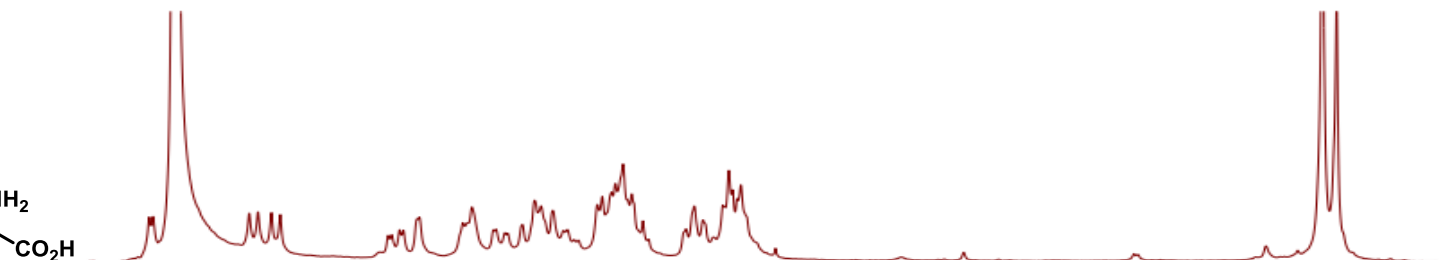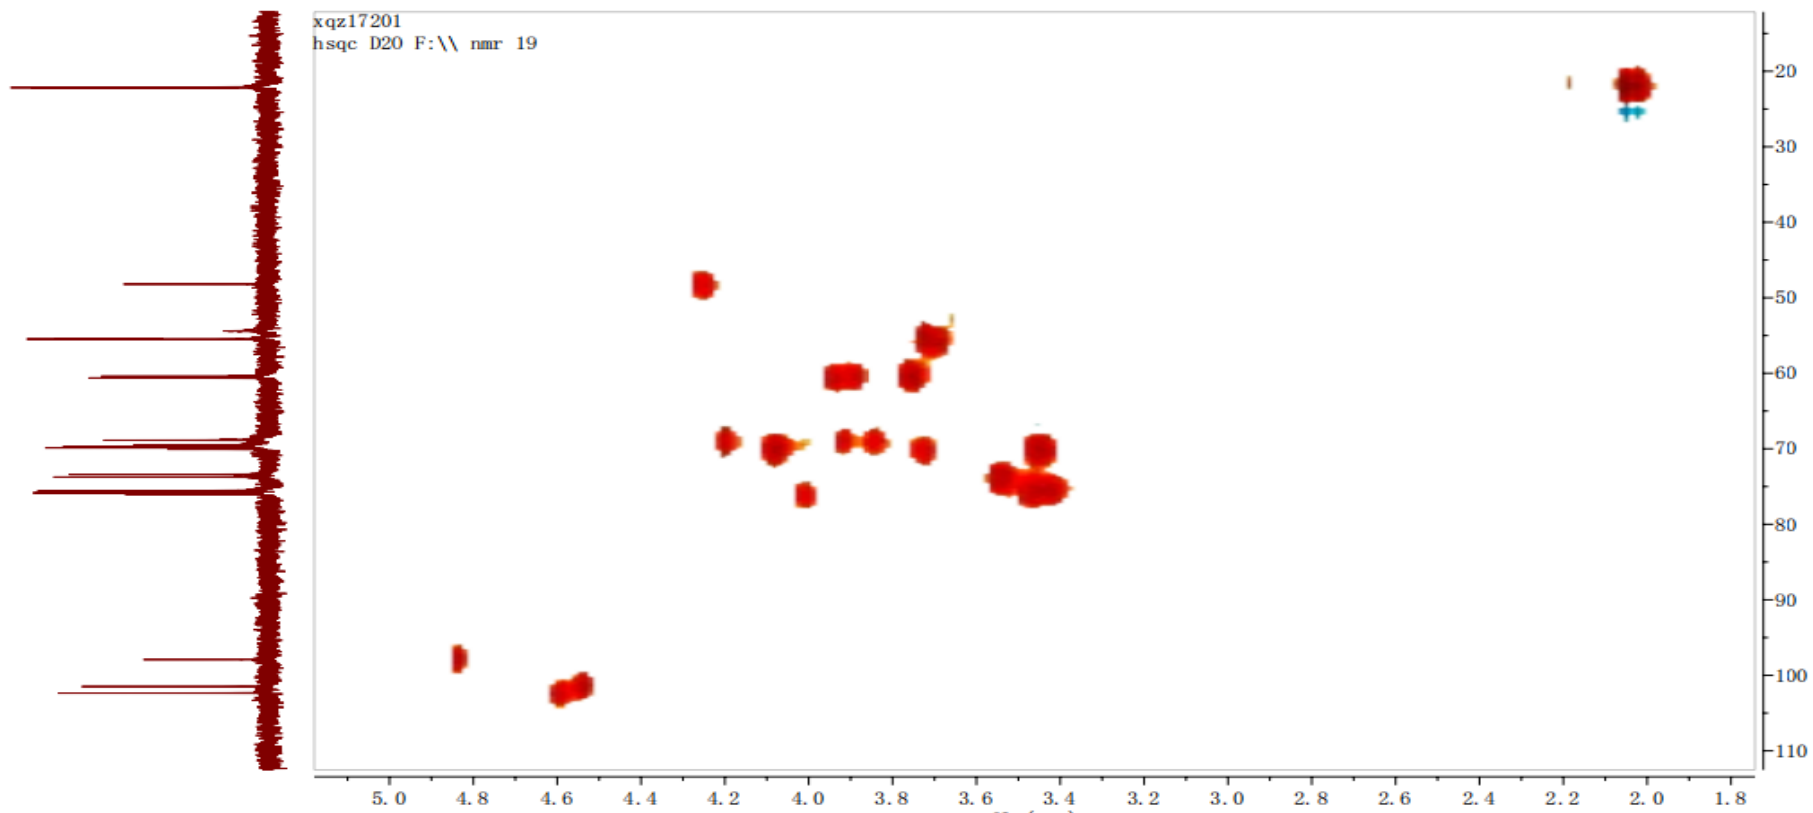

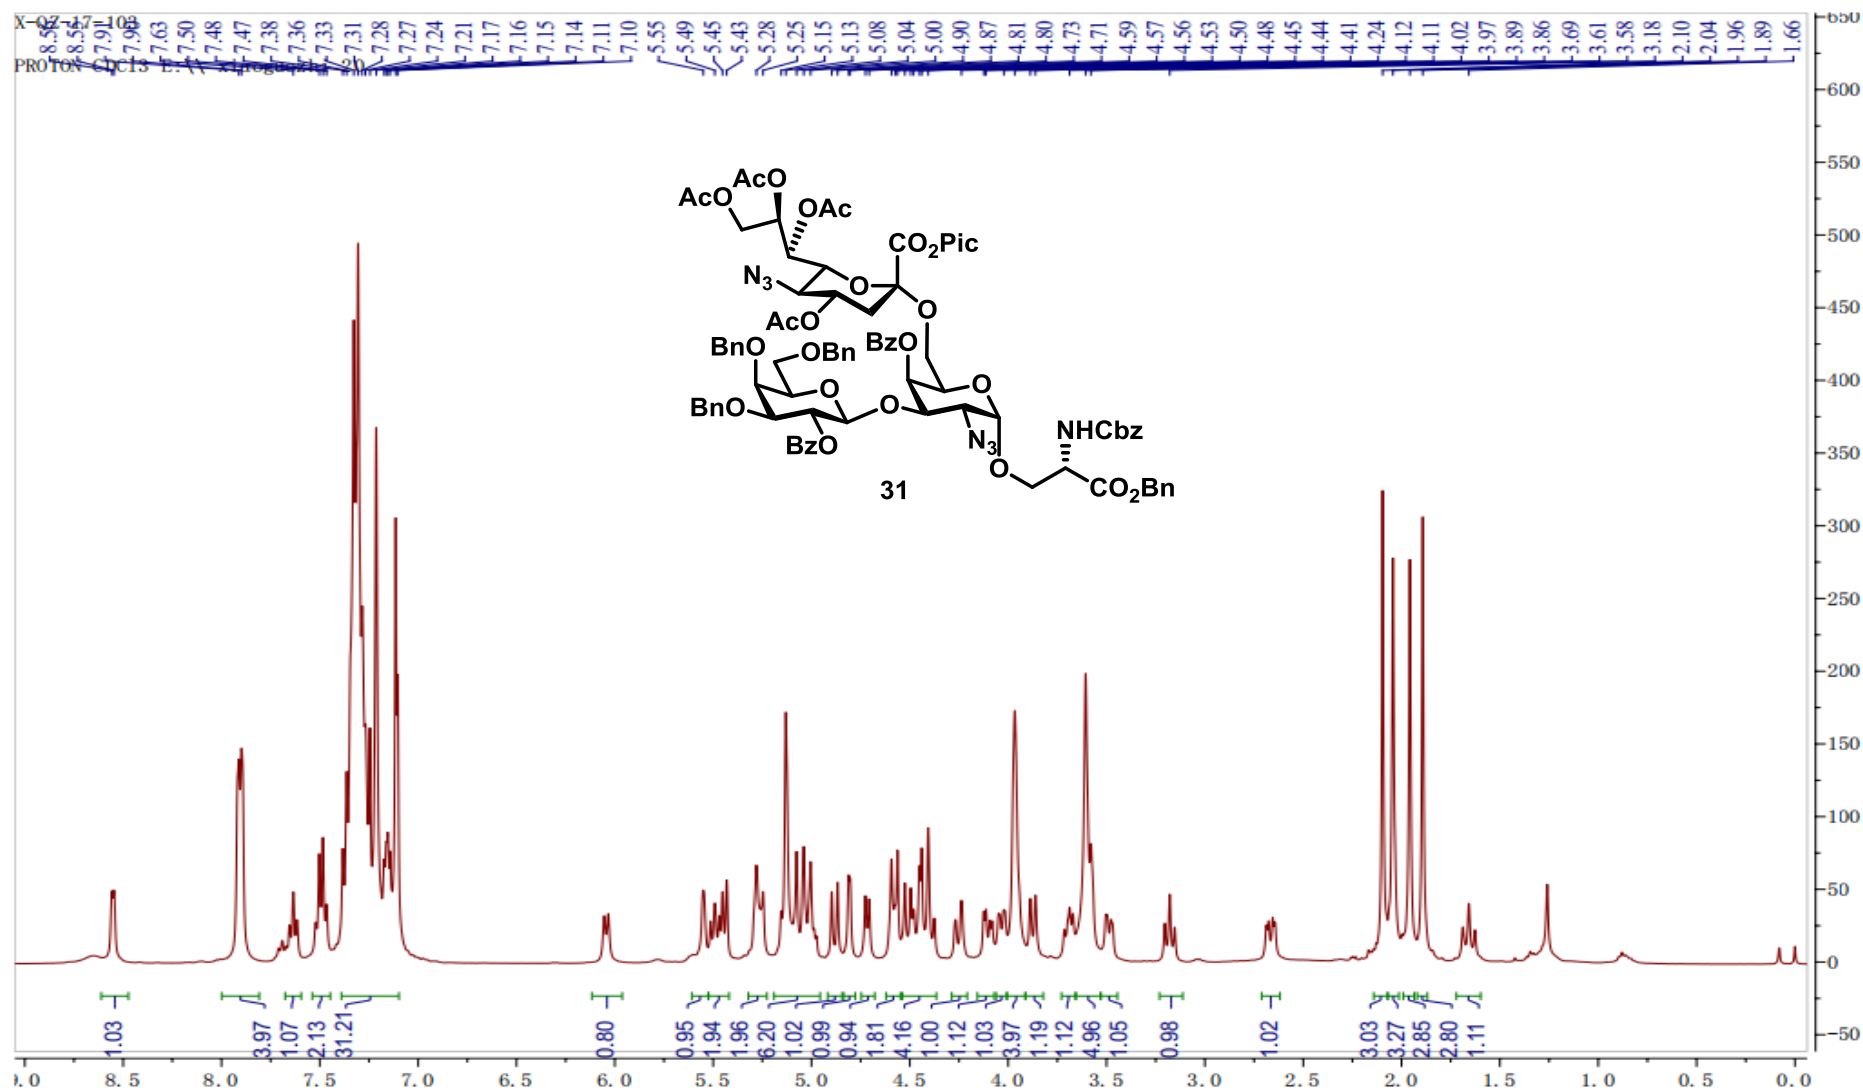

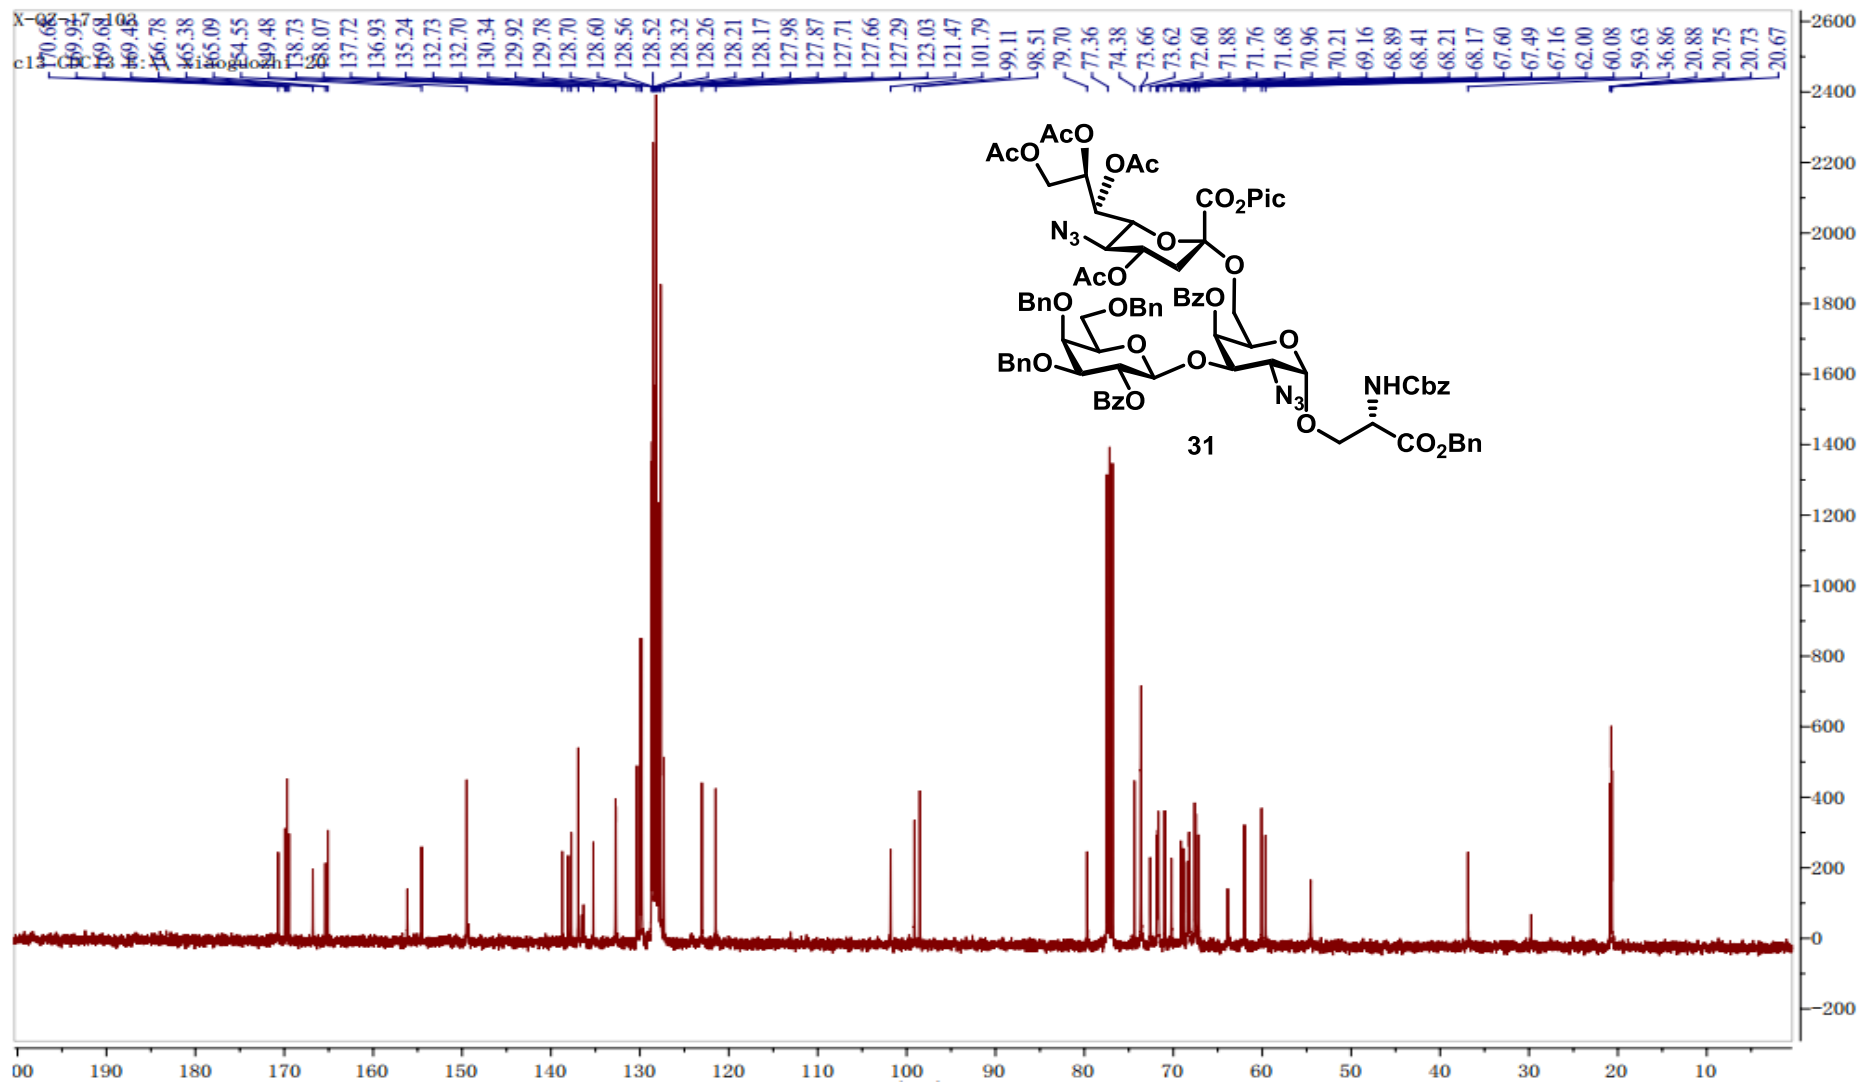



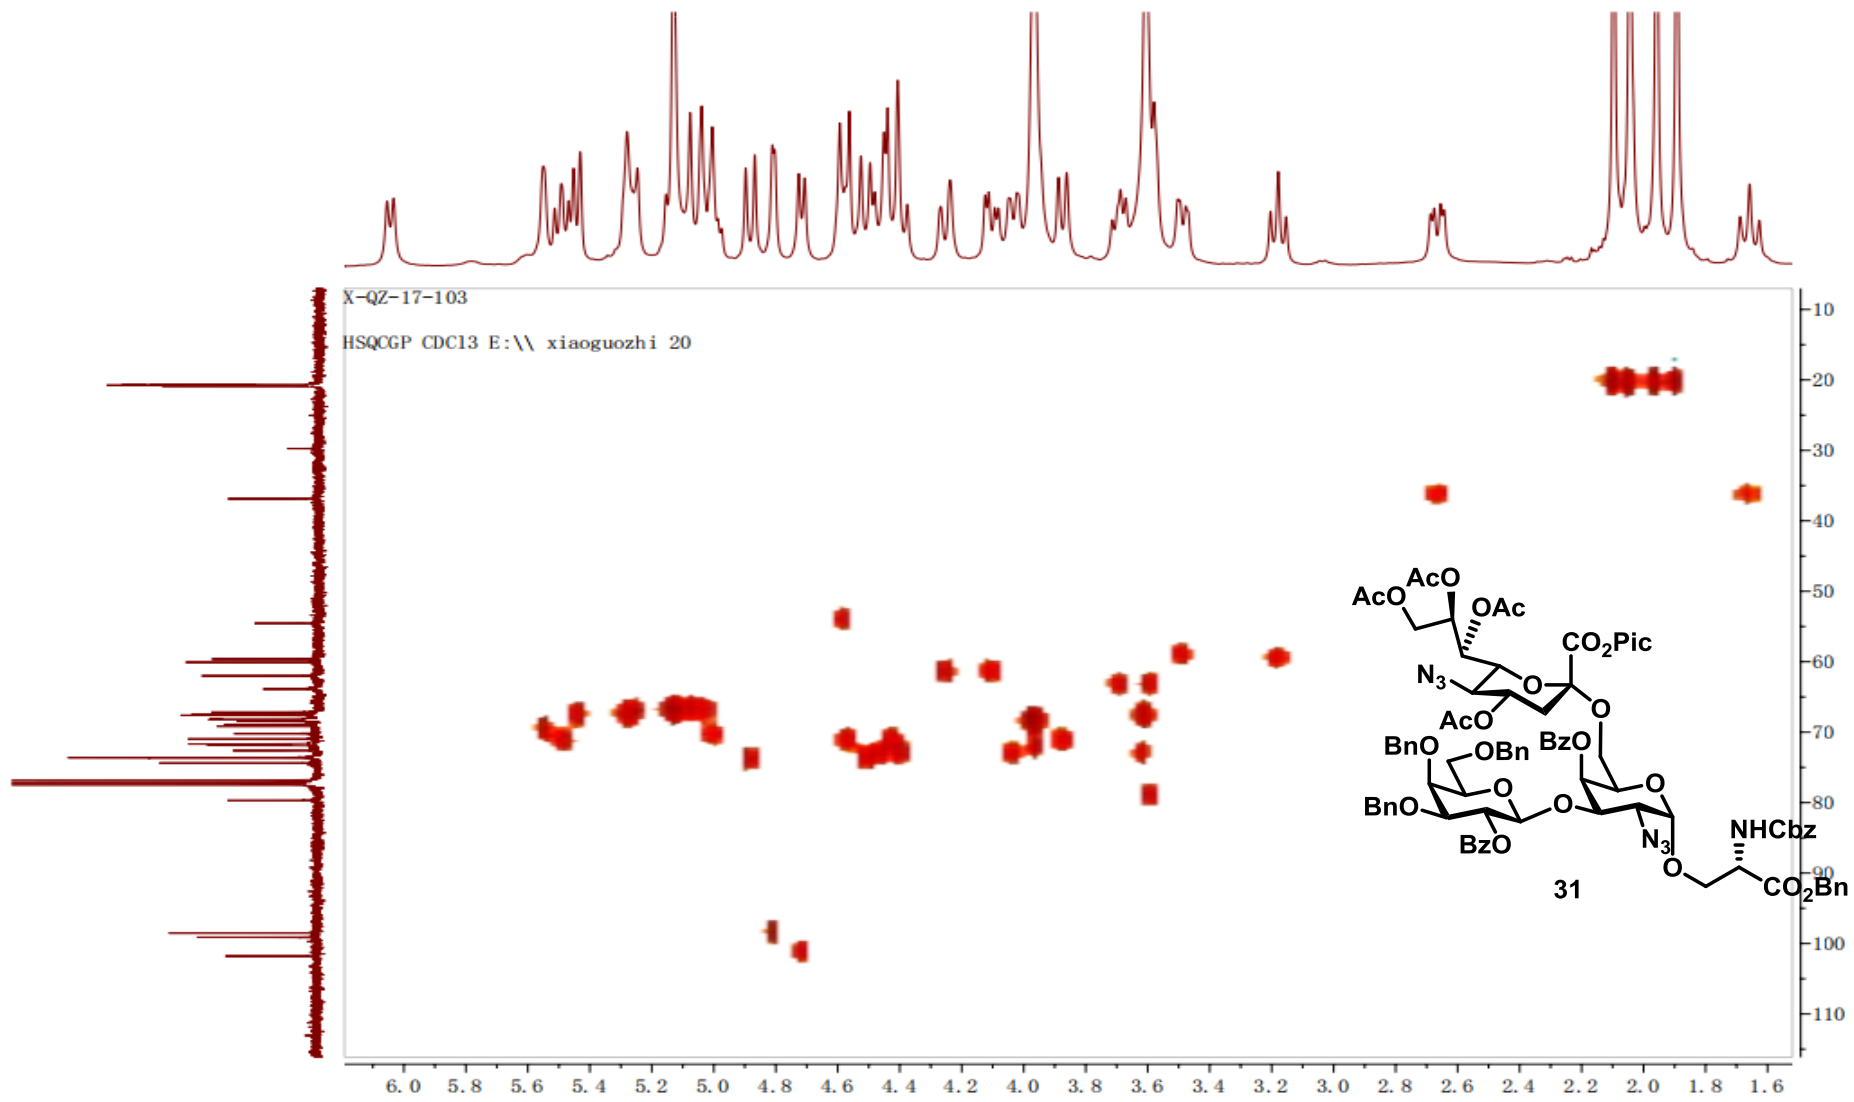

X-QZ-17-94-2  
X-QZ-17-94-2  
PROTON D20 E:\ xiaoguozi 14

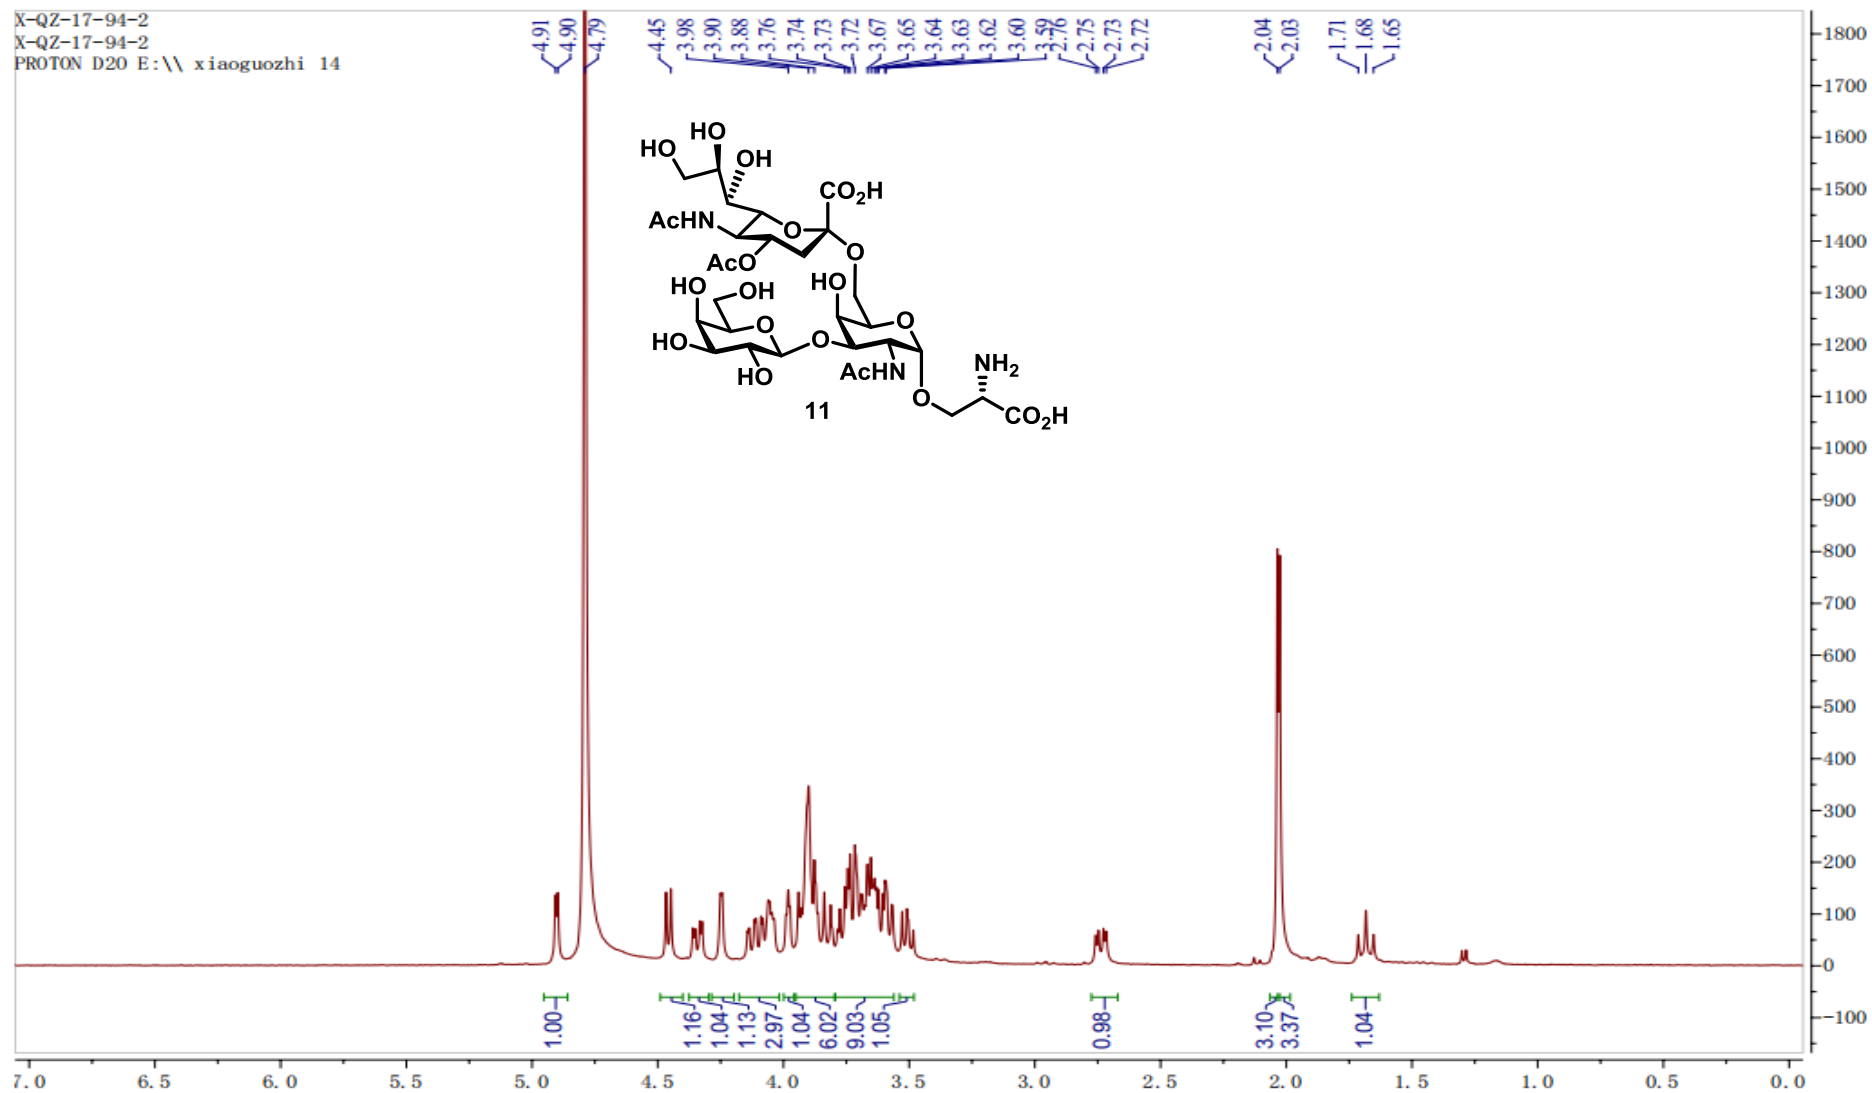



xqz1794c  
c13 D2O D:\ nmr 22

174.96  
174.62  
173.45

104.64  
100.18  
98.15

74.89  
72.55  
72.48  
71.73  
70.51  
69.44  
68.56  
68.54  
68.19  
62.60  
60.90  
51.78  
48.29  
40.19

22.03  
21.98

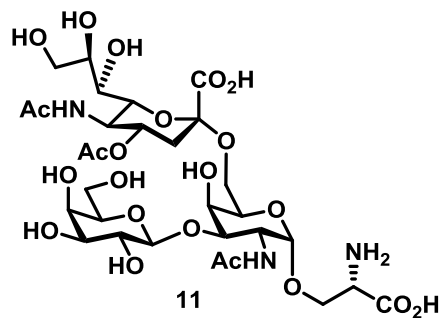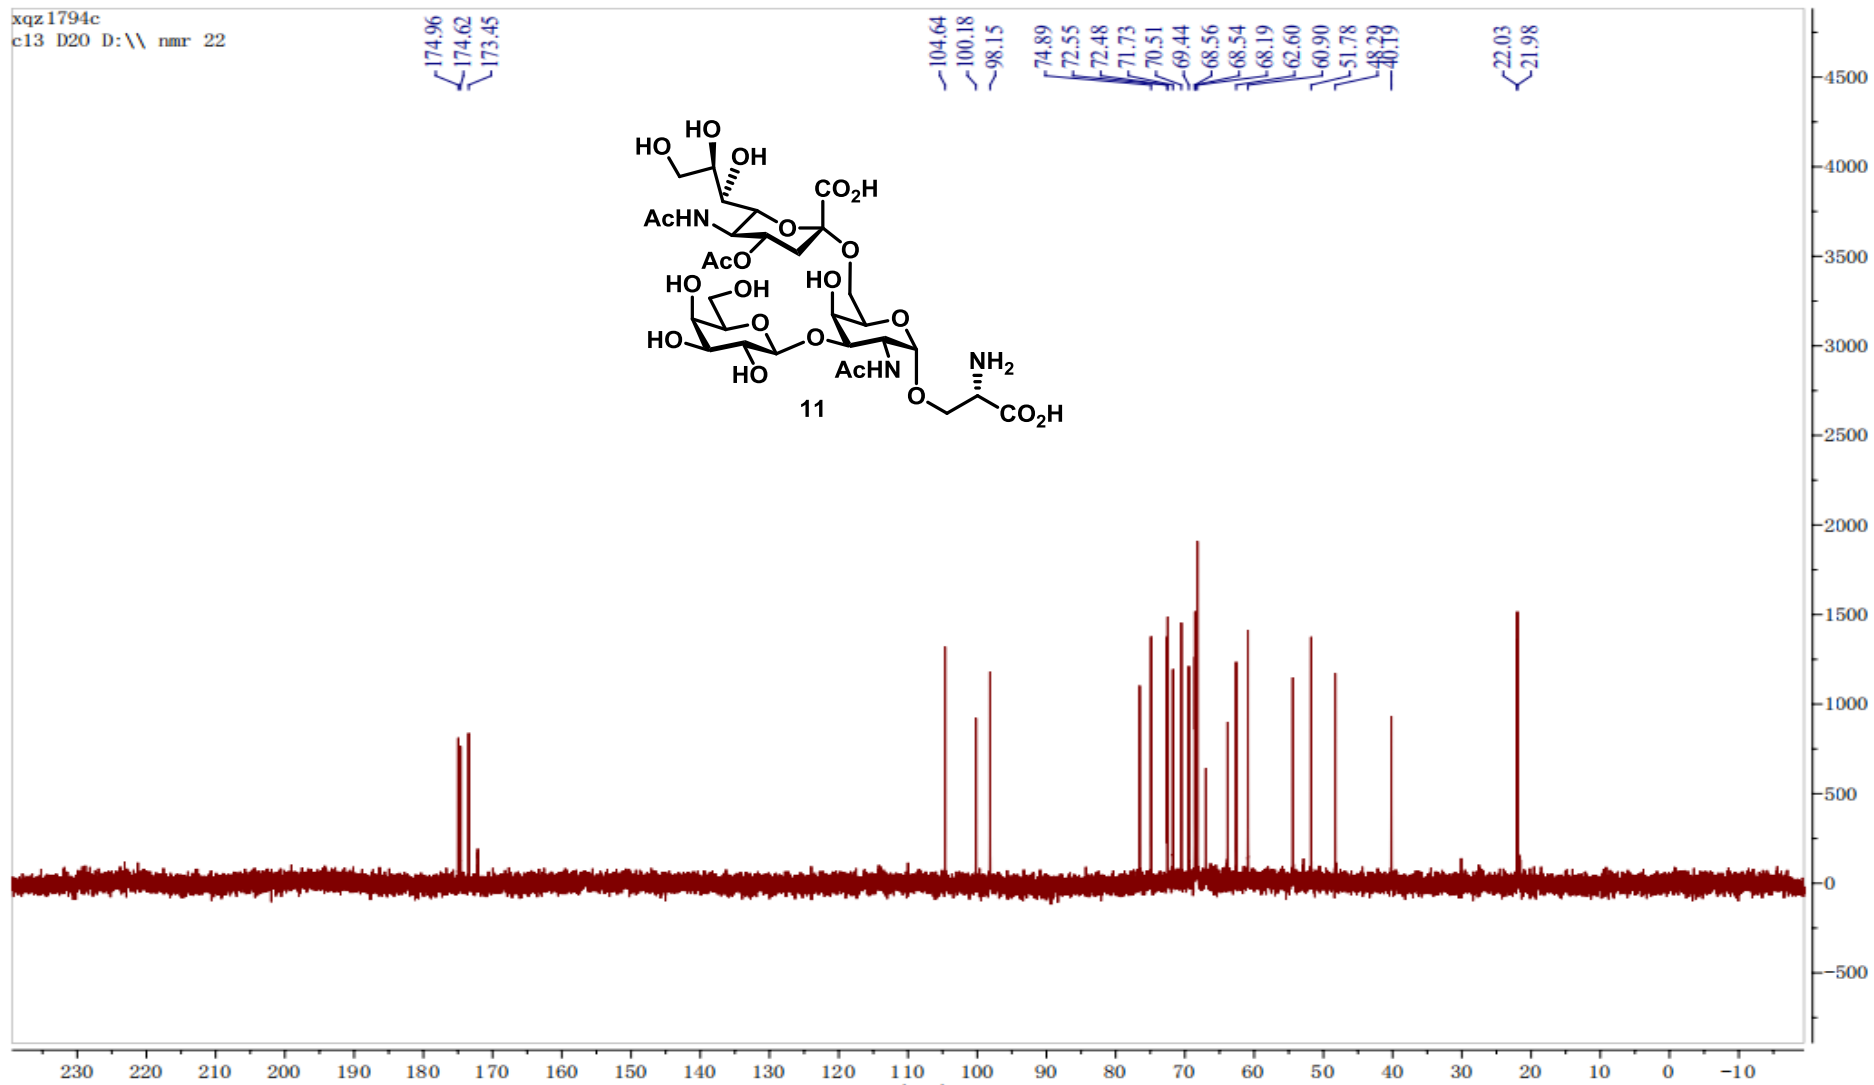

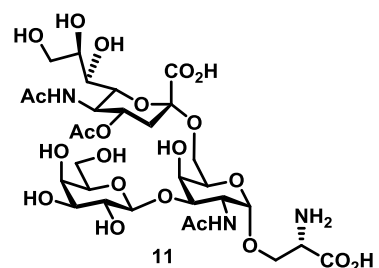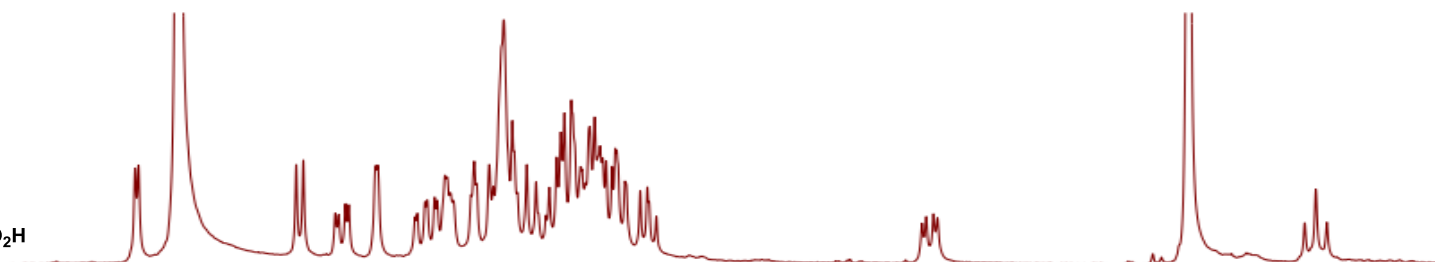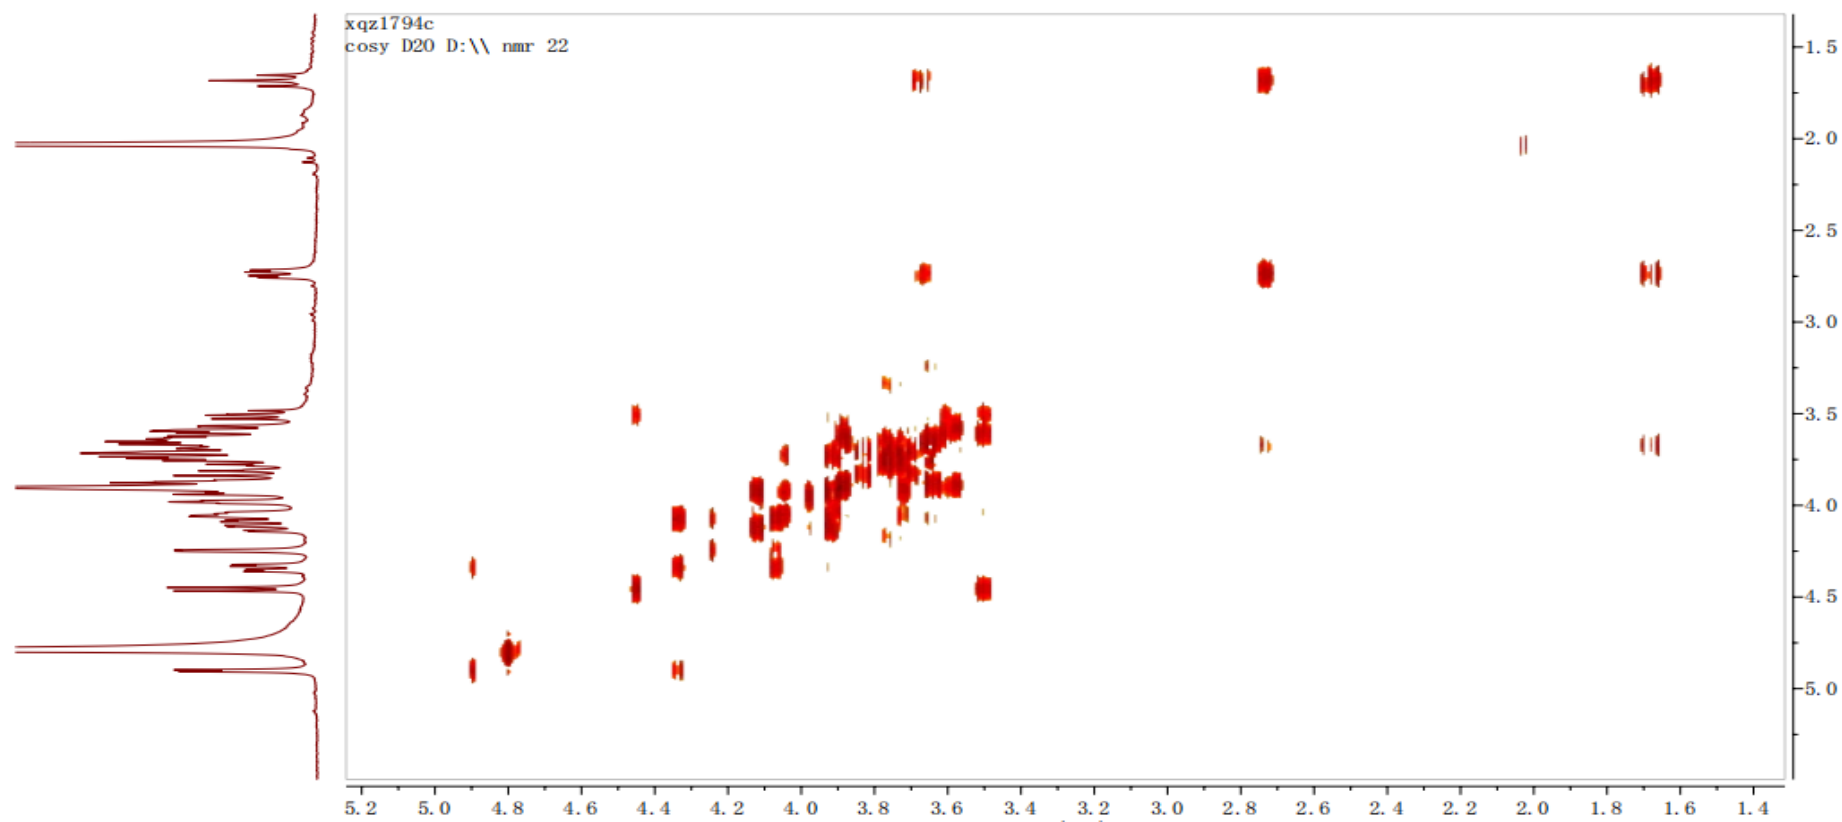

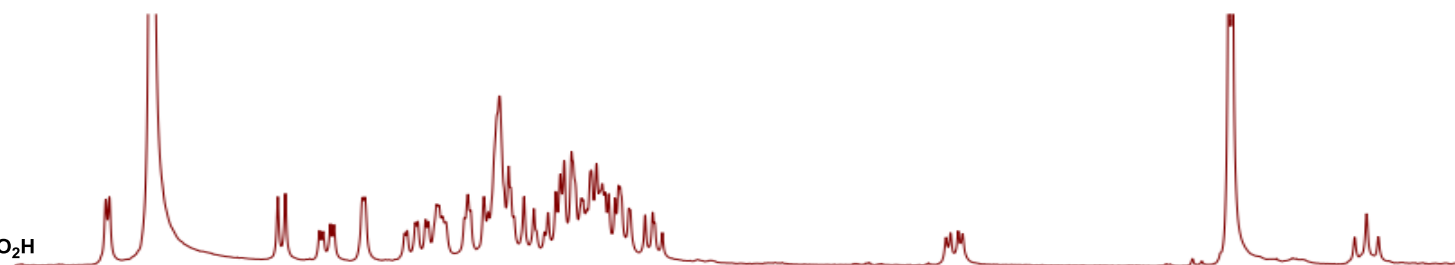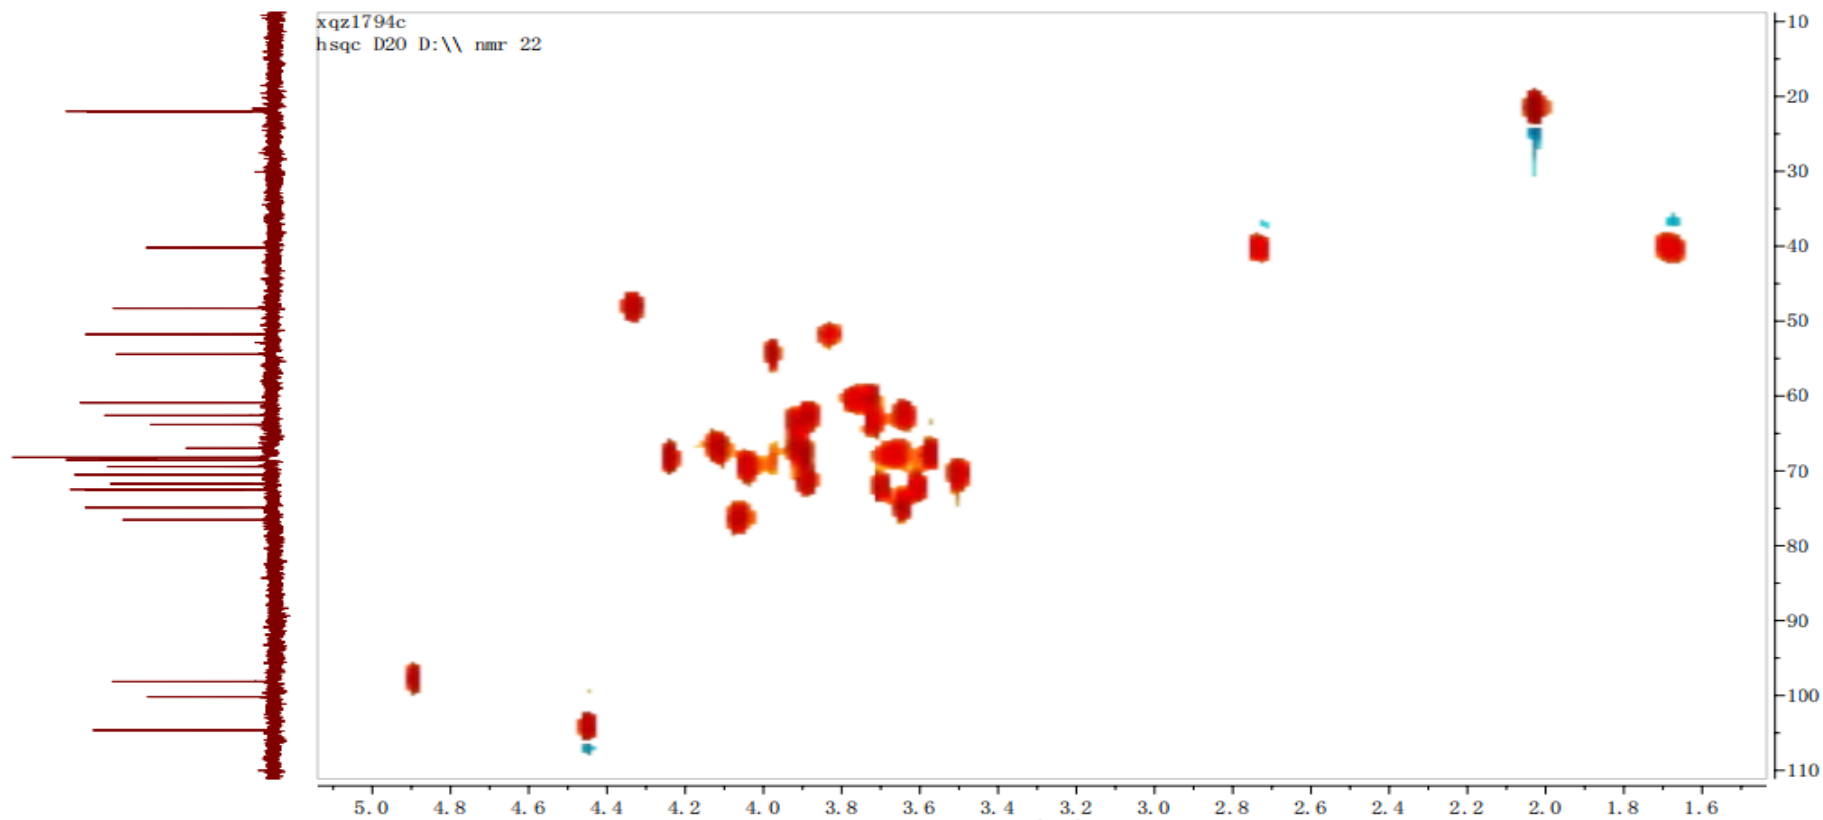

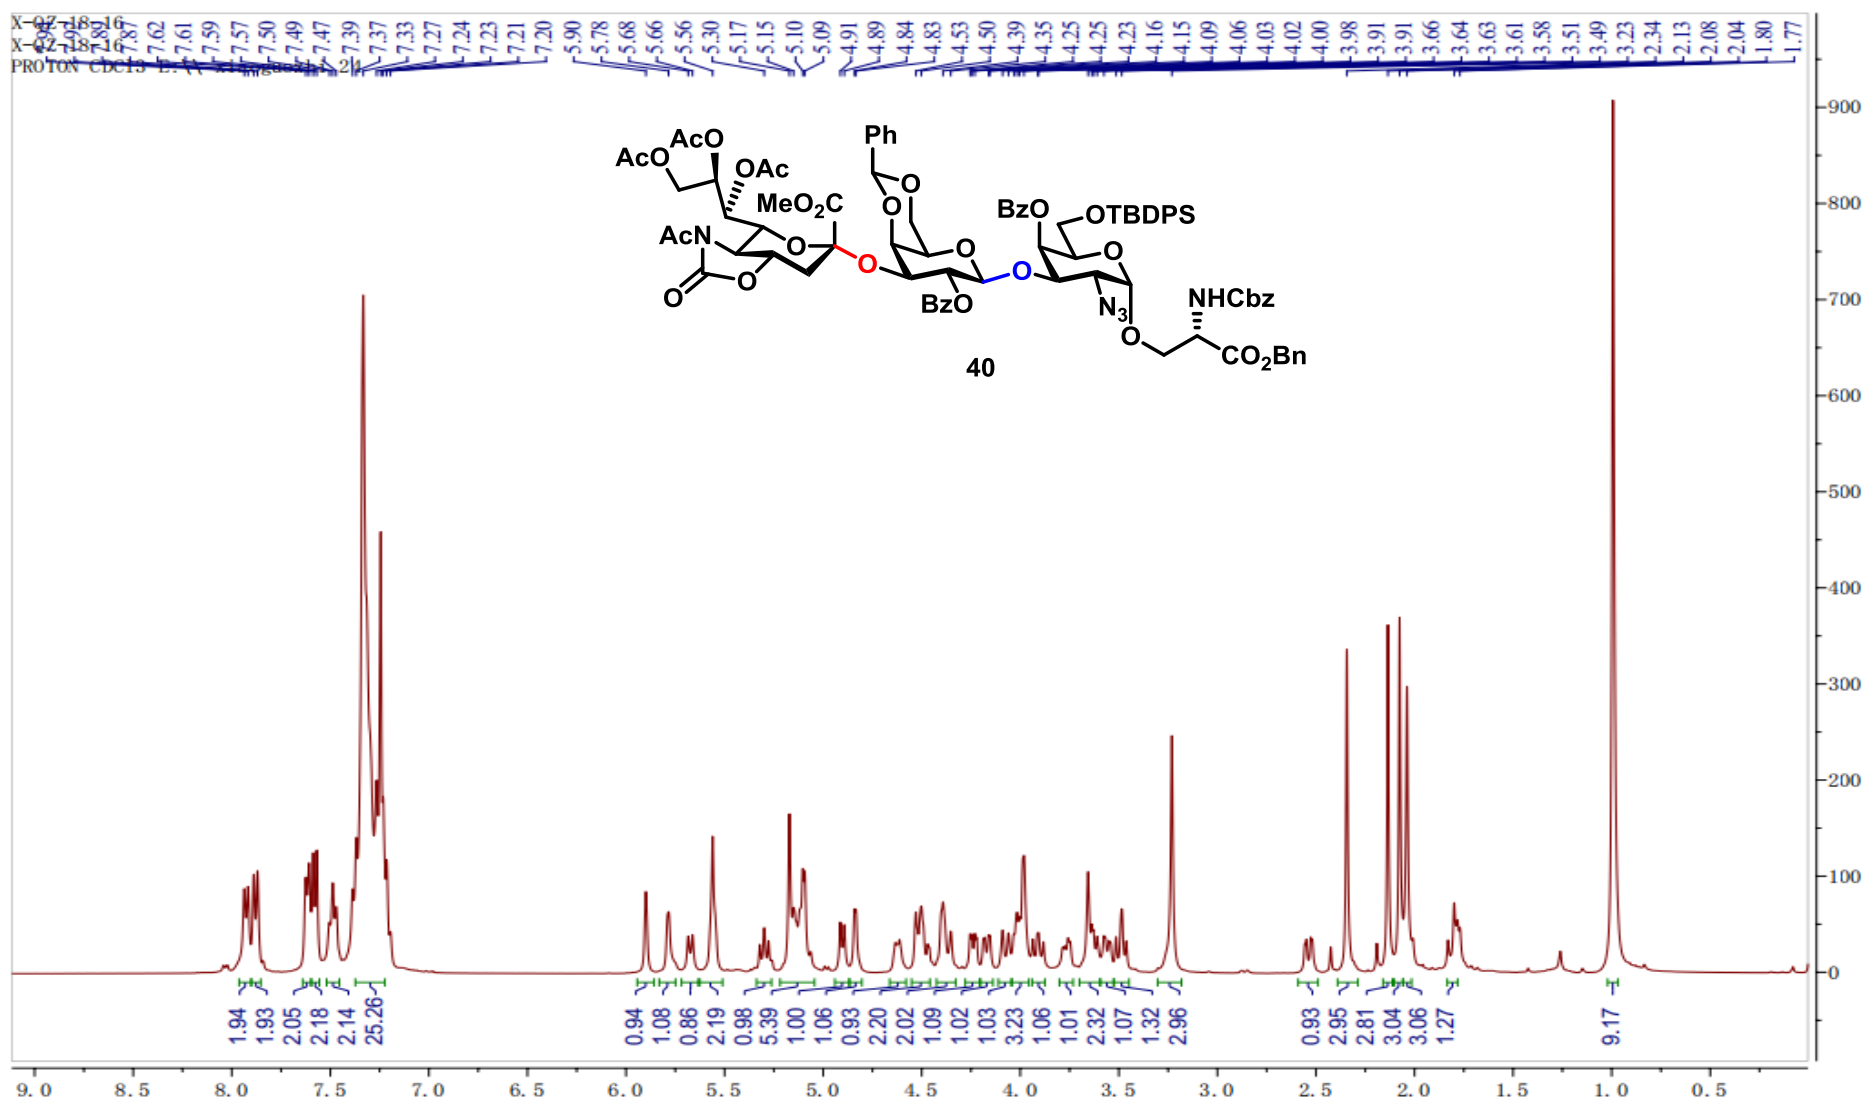

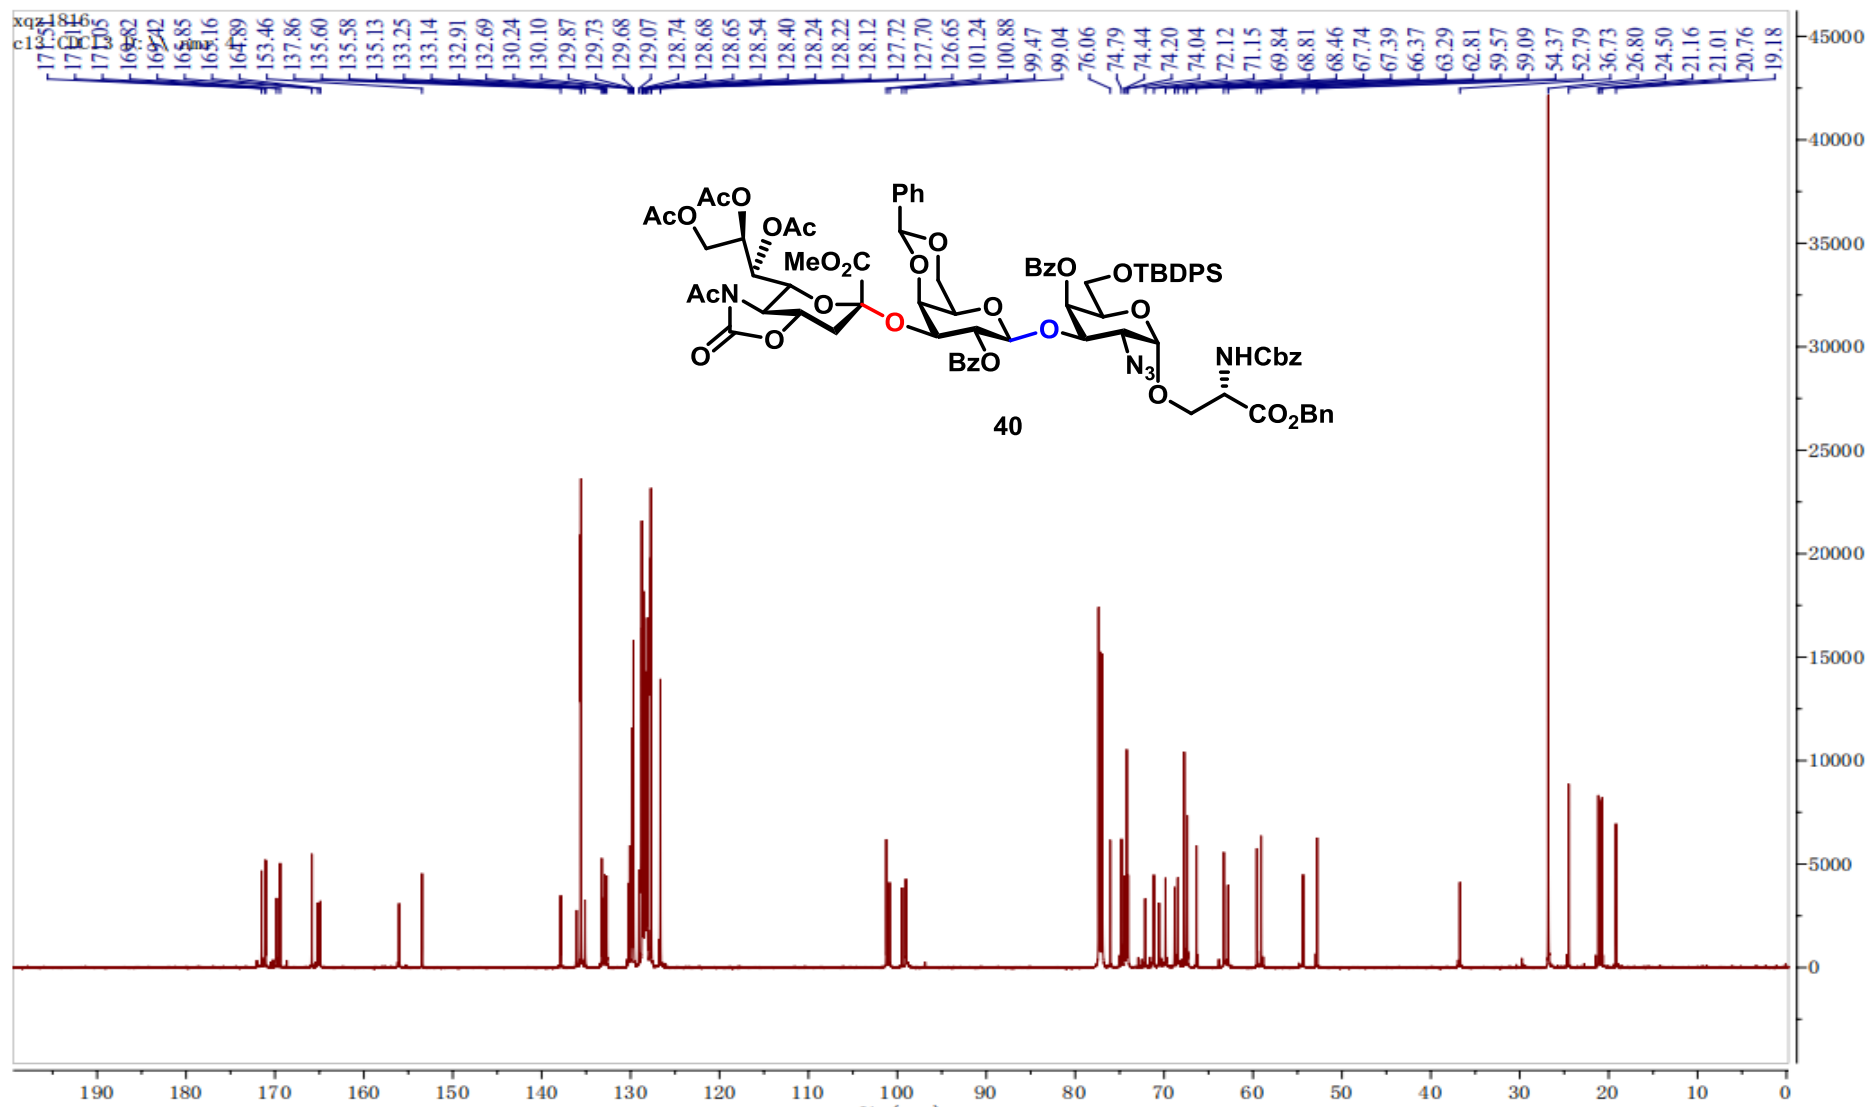

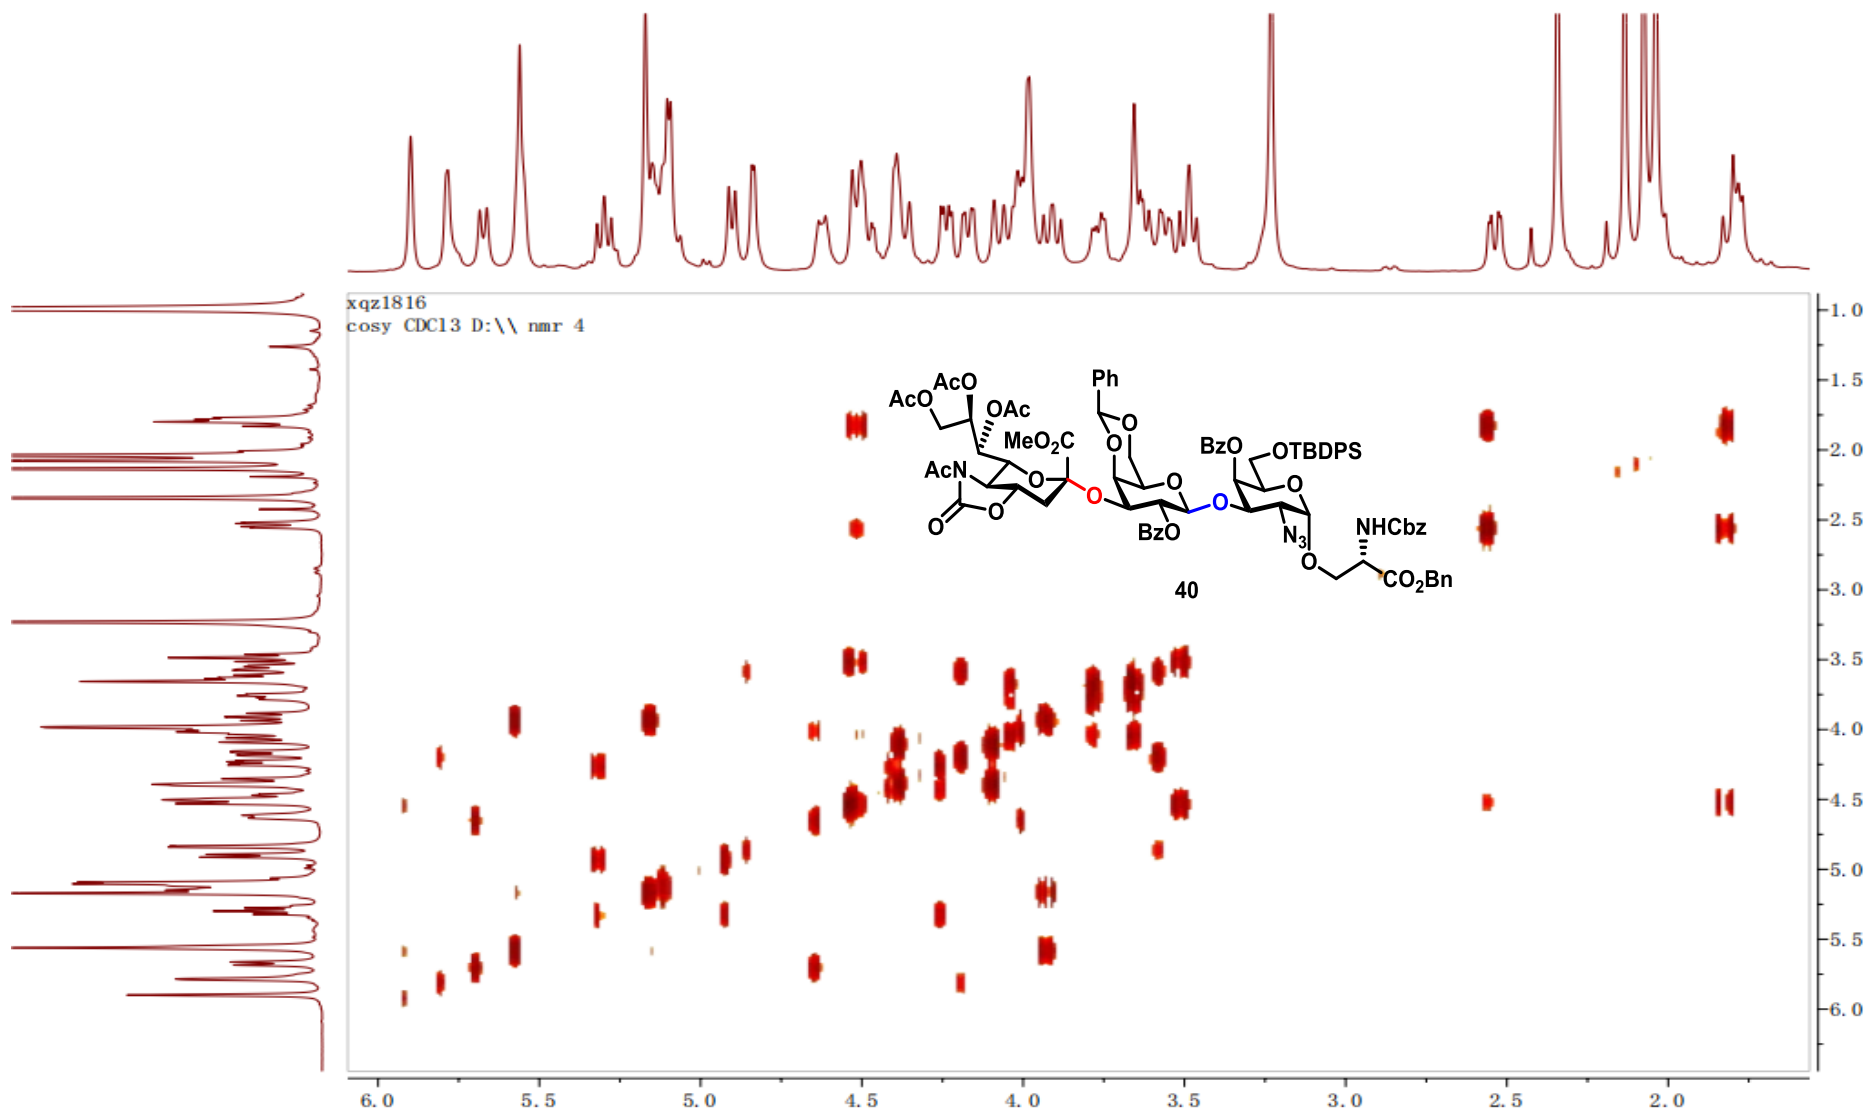

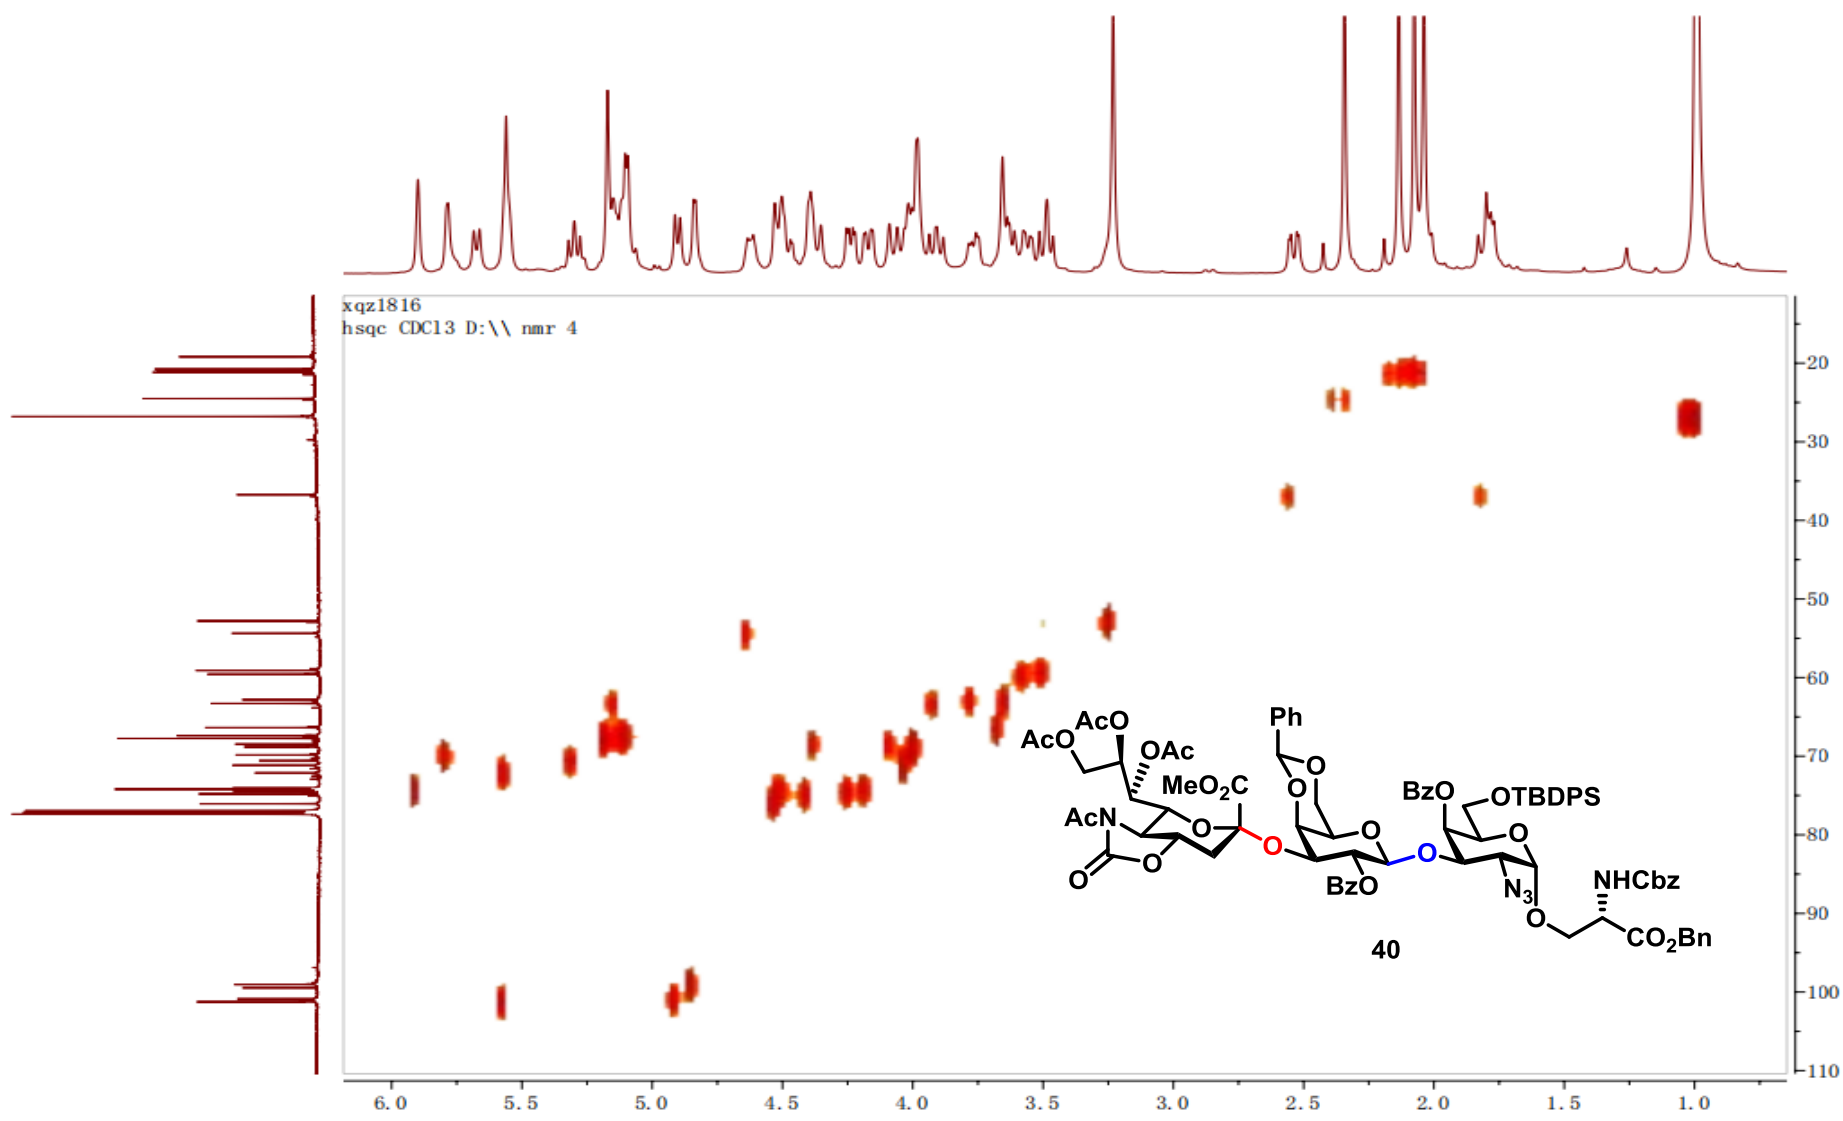

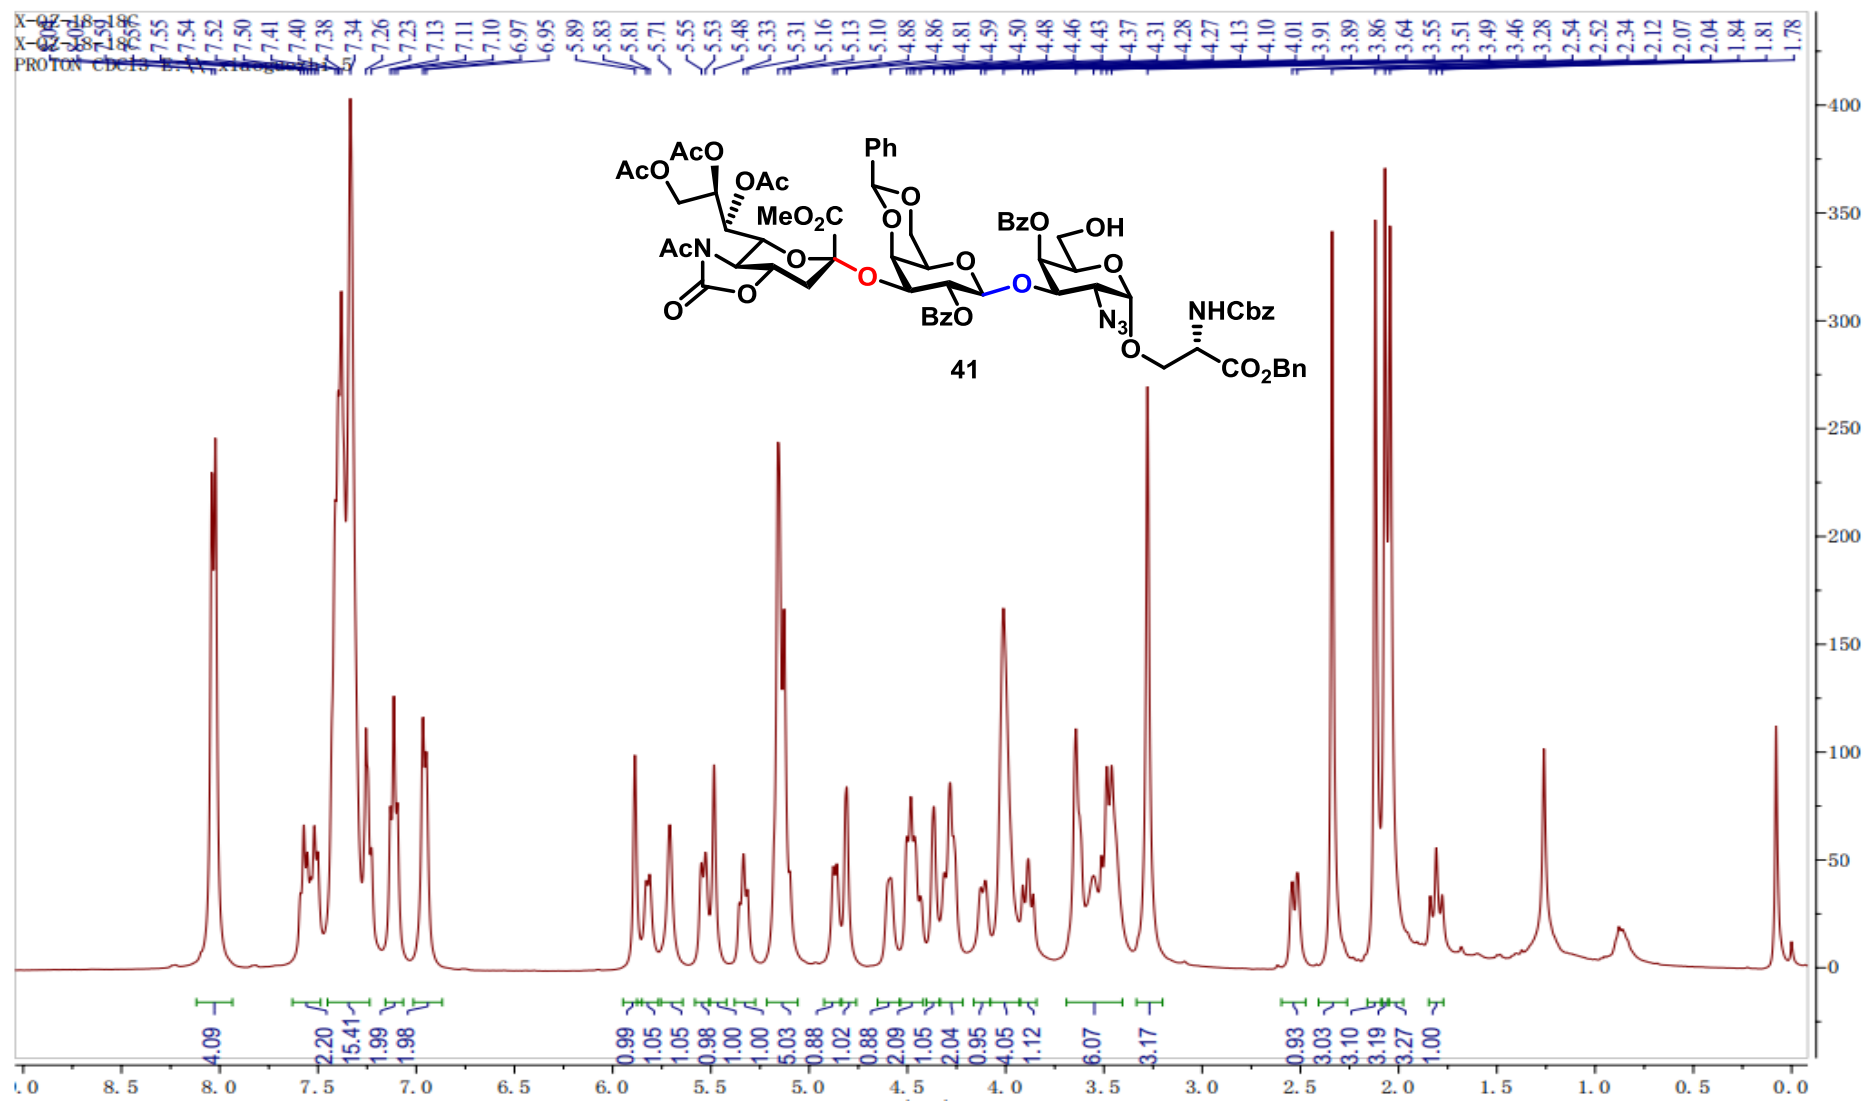



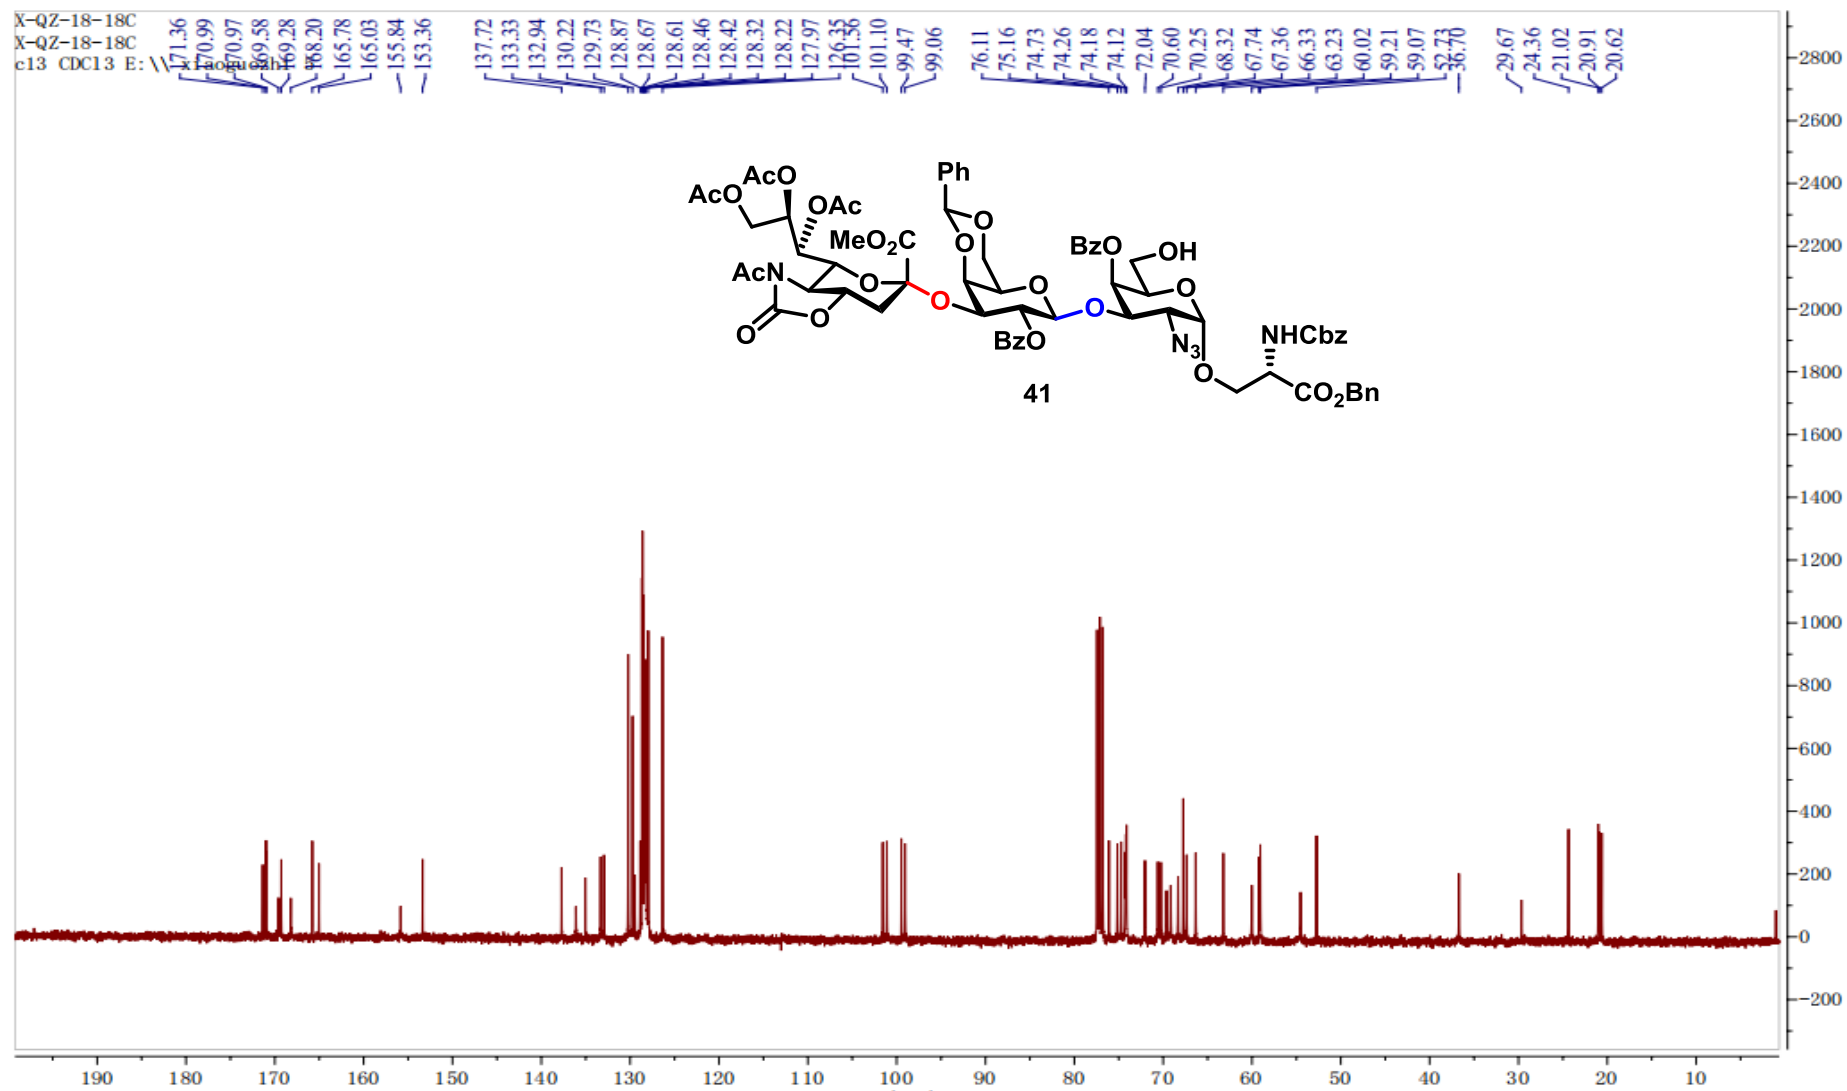

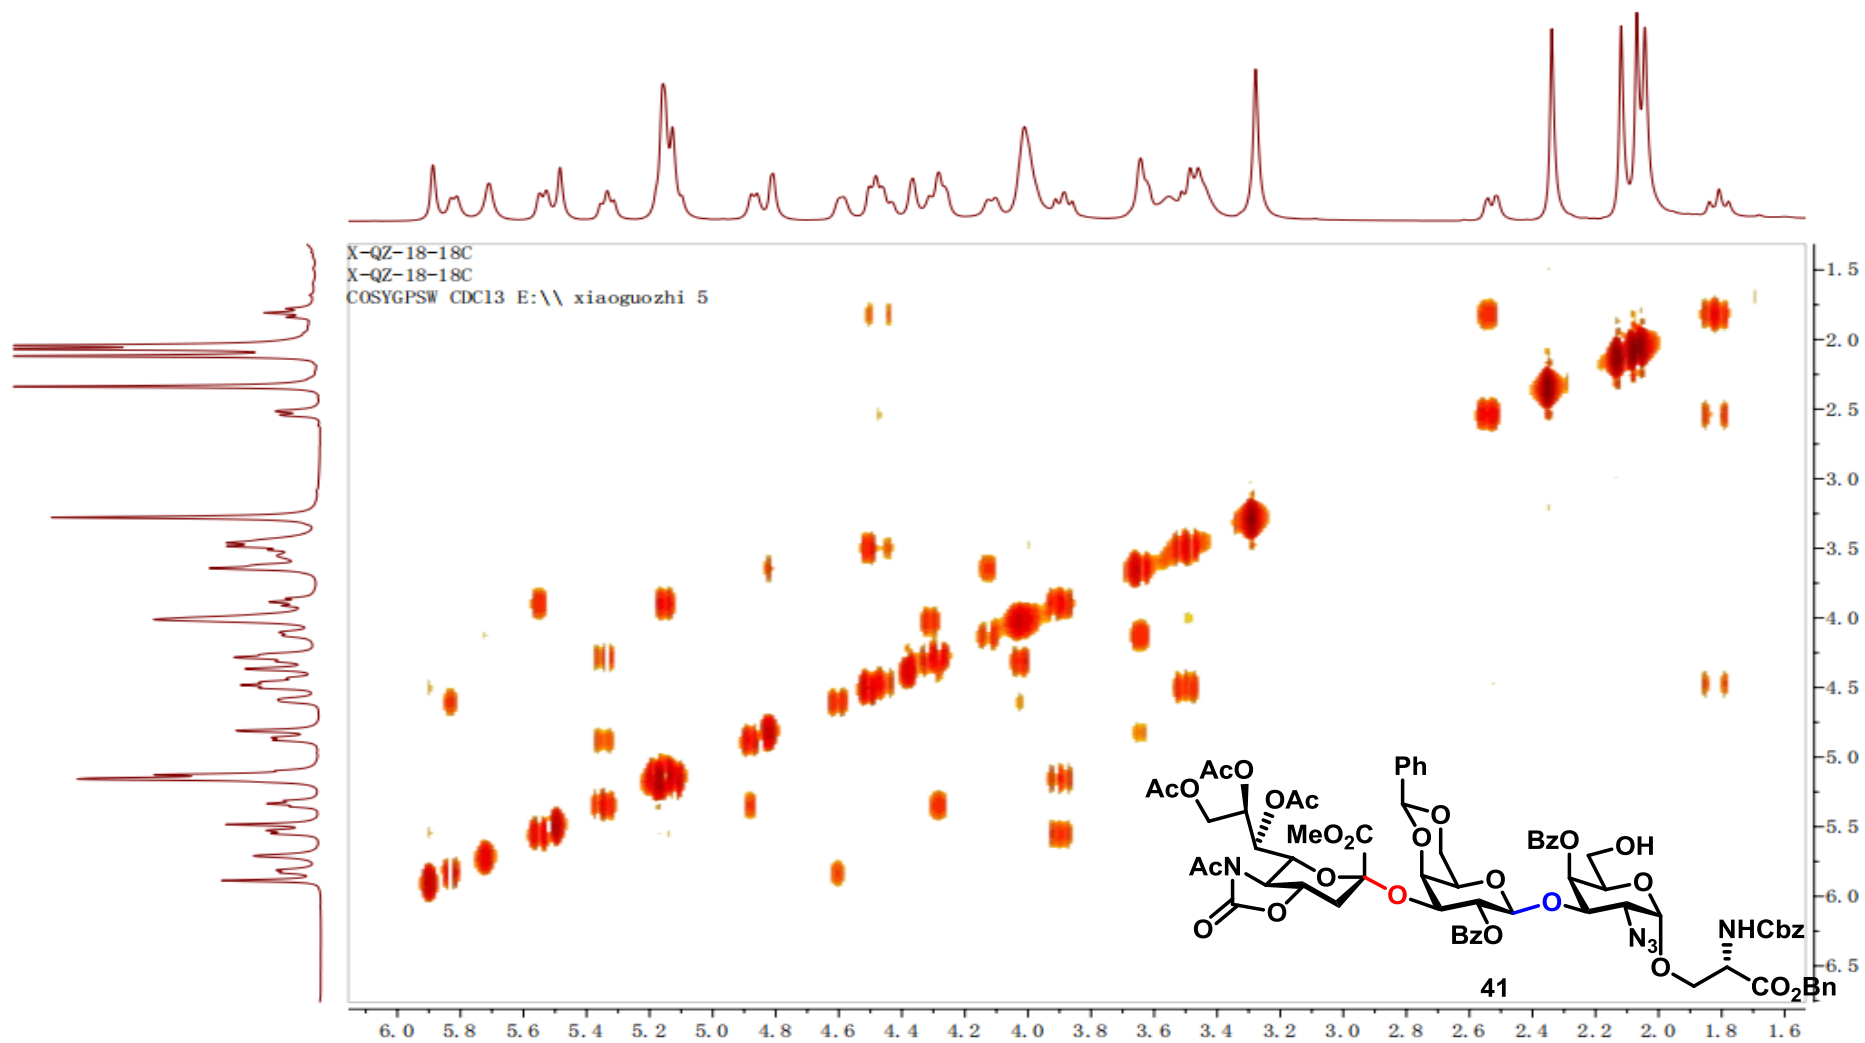

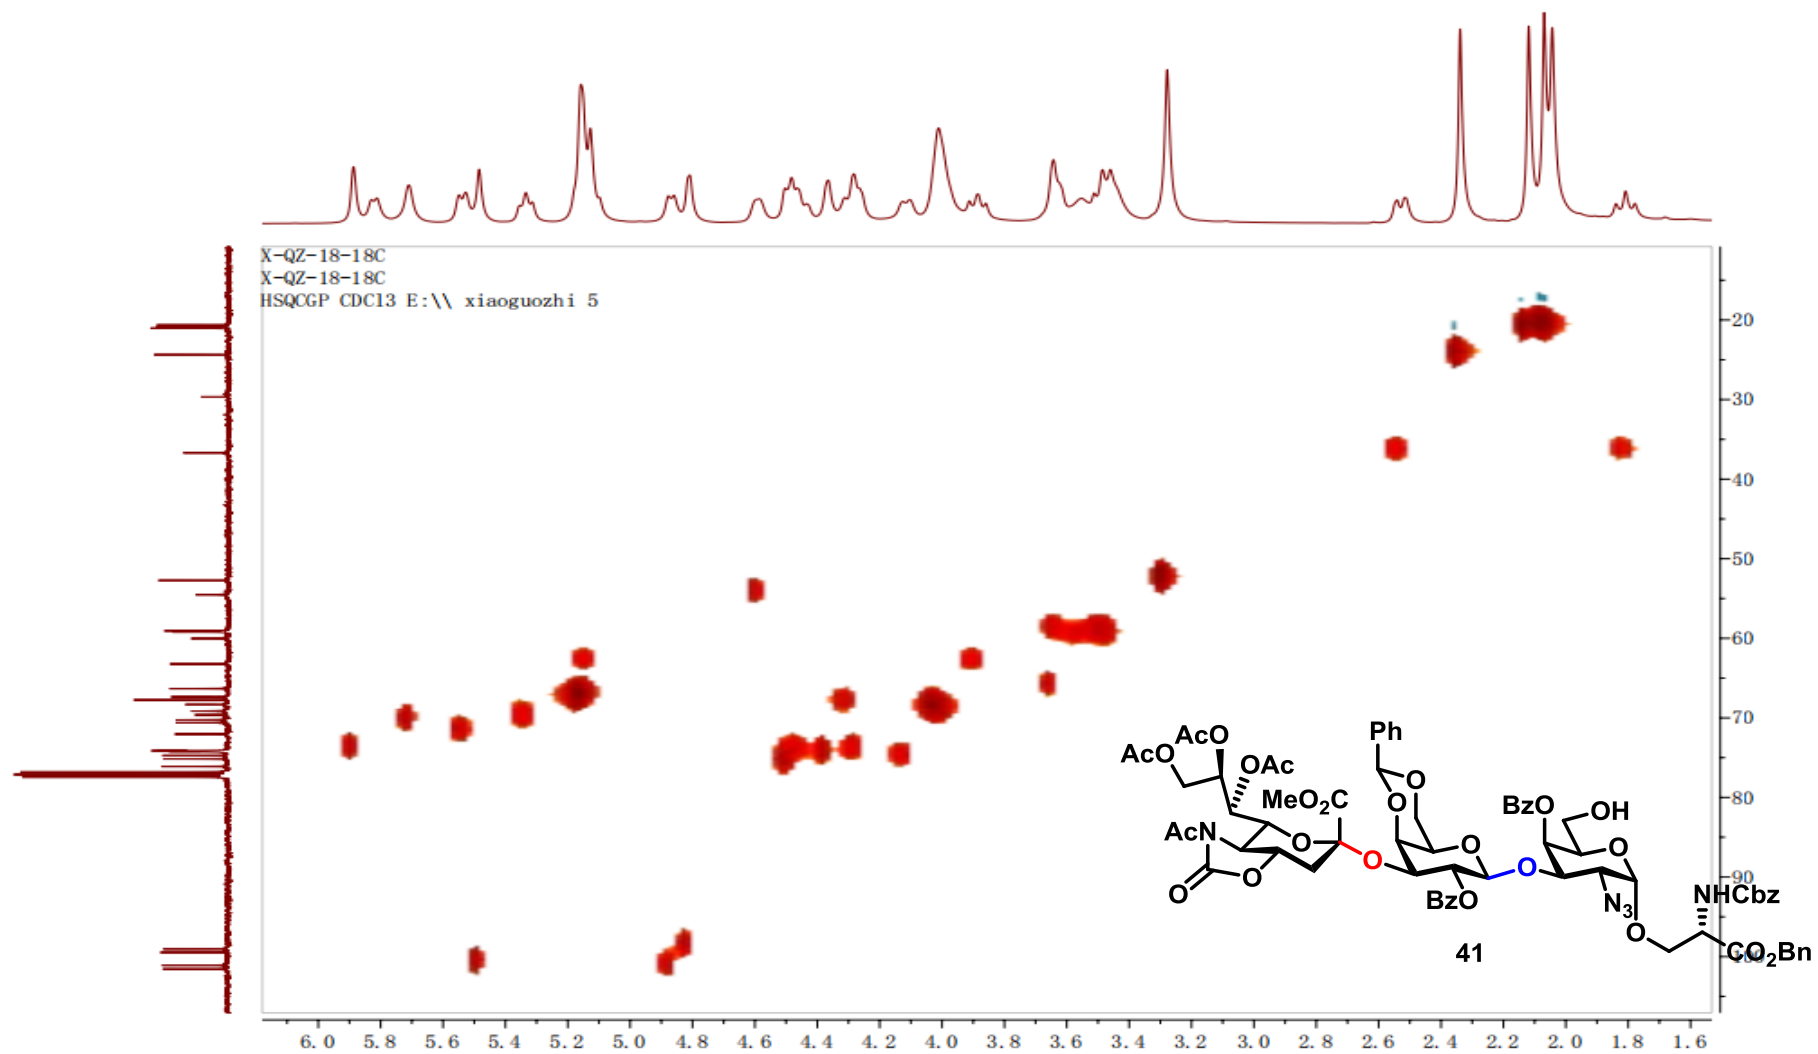

X-QZ-18-51-1  
X-QZ-18-51-1  
PROTON D2O E:\\ xiaoguozi 16

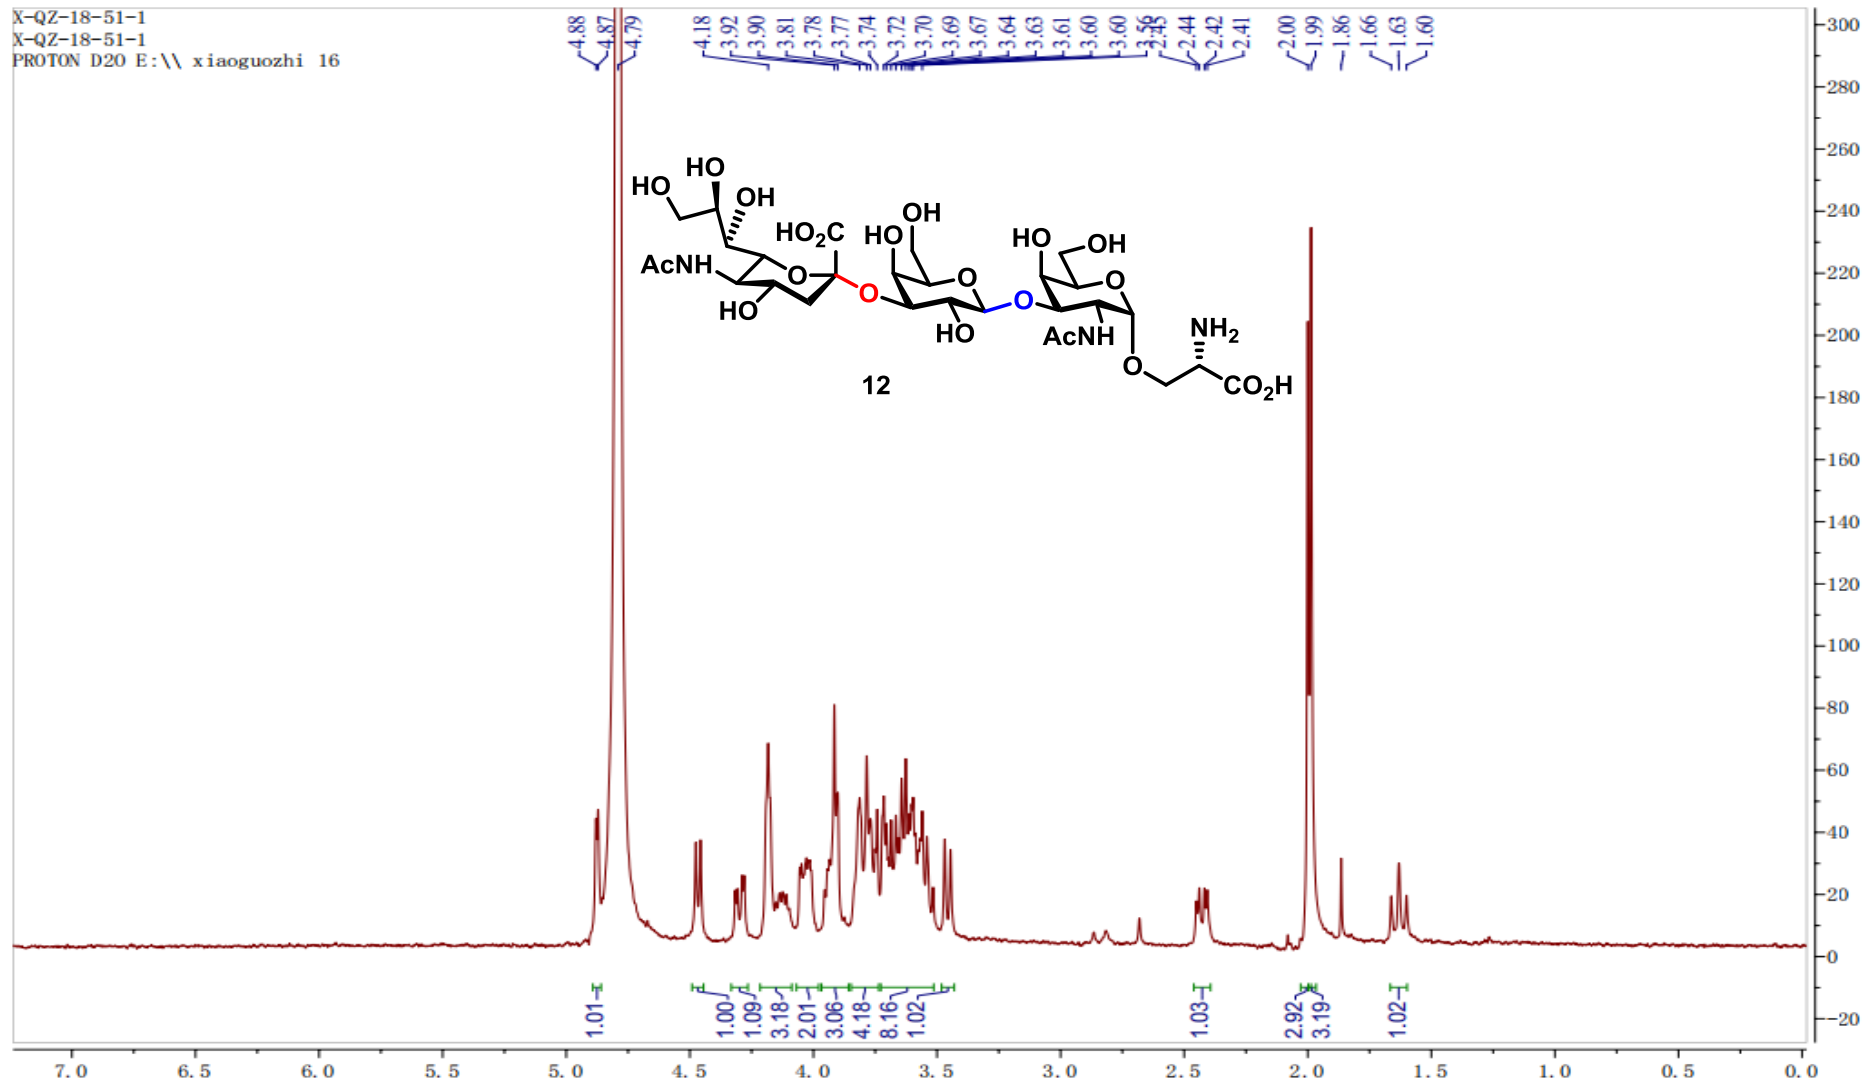

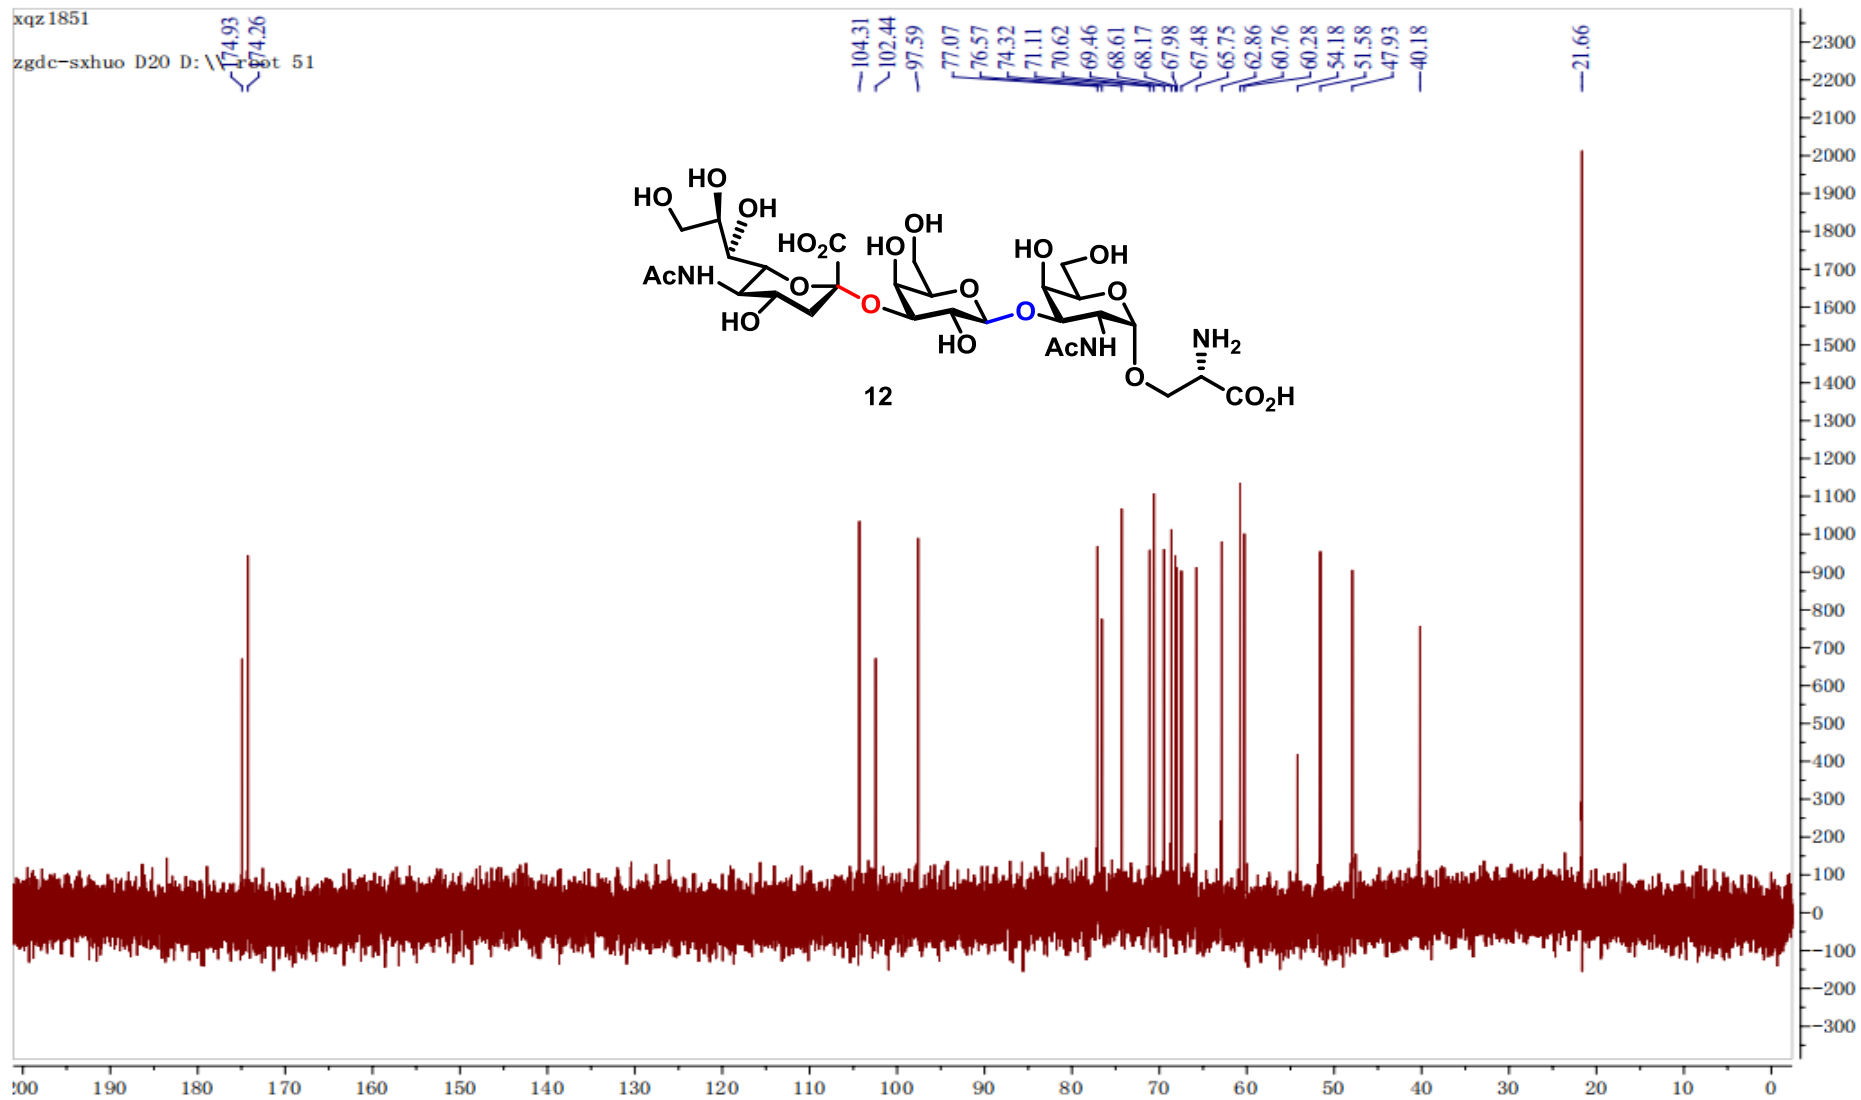

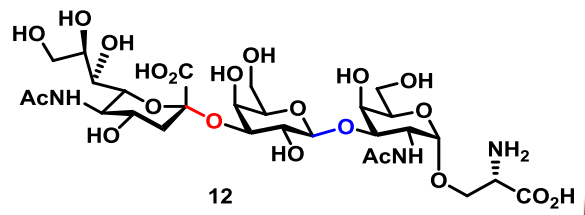

12

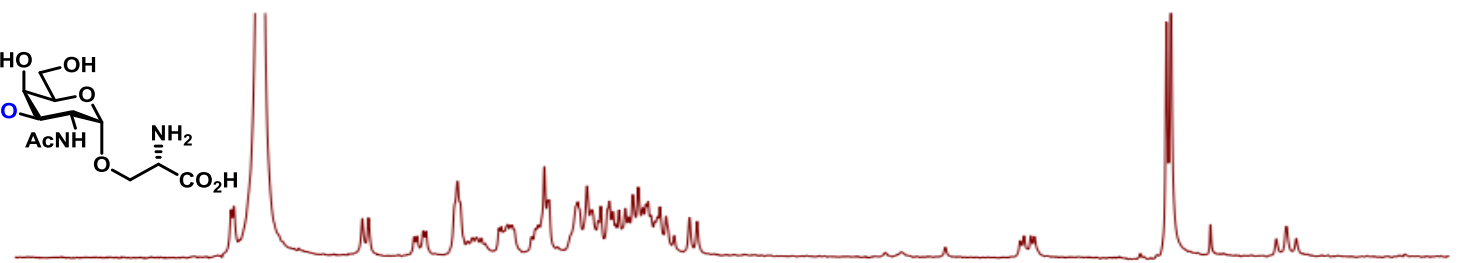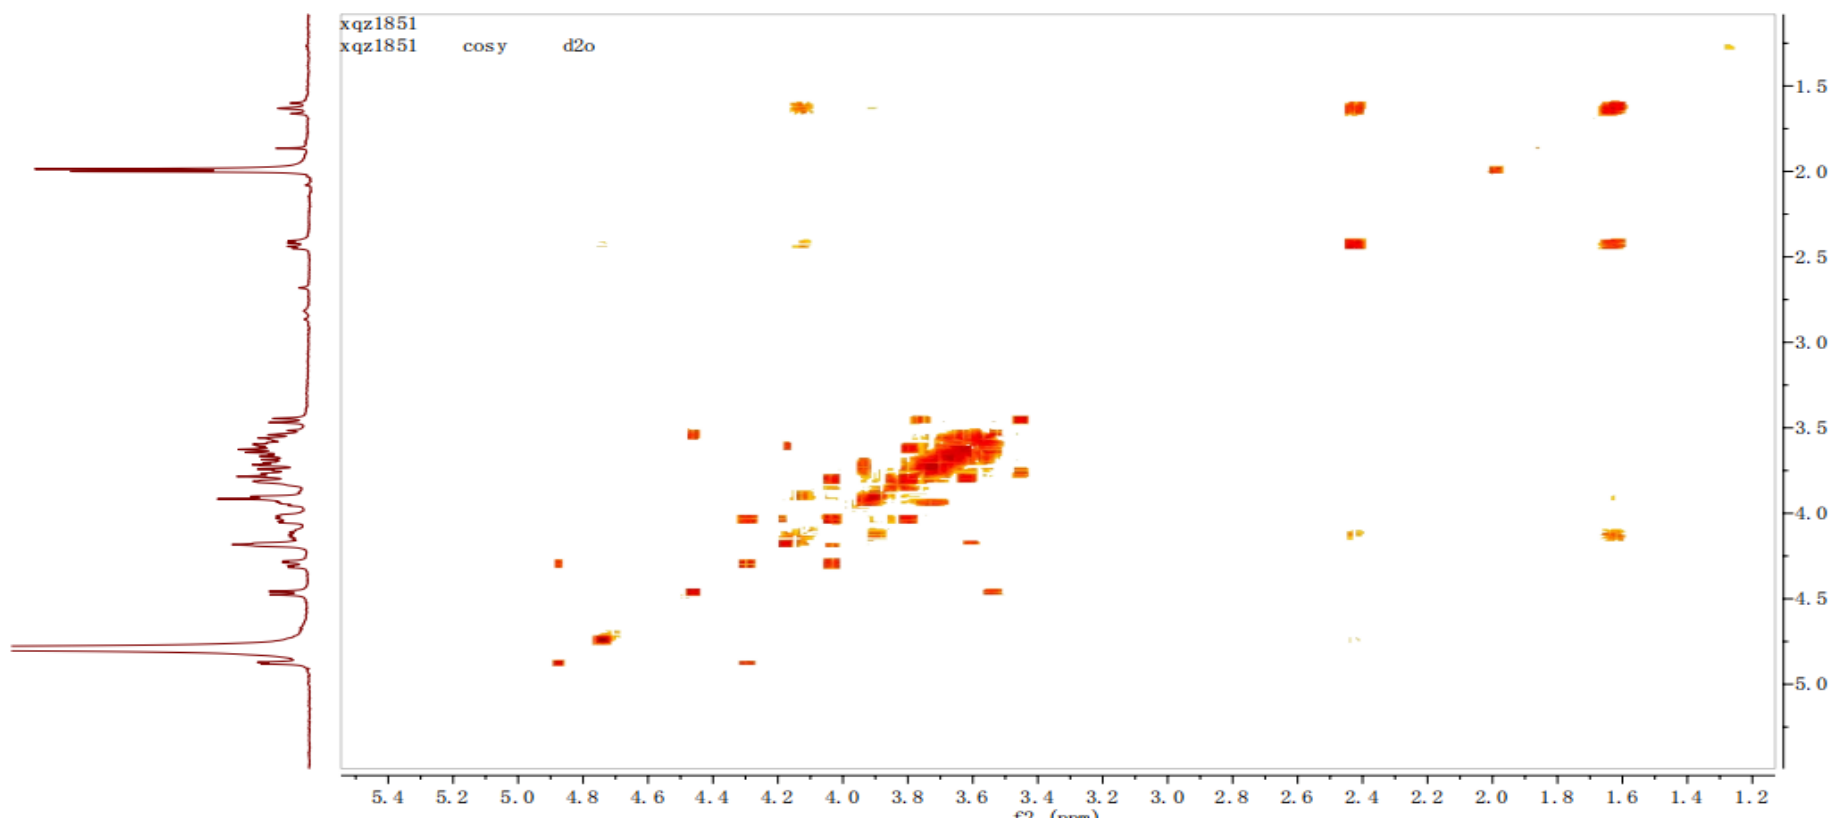

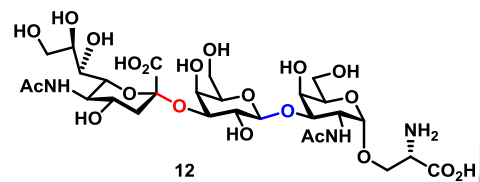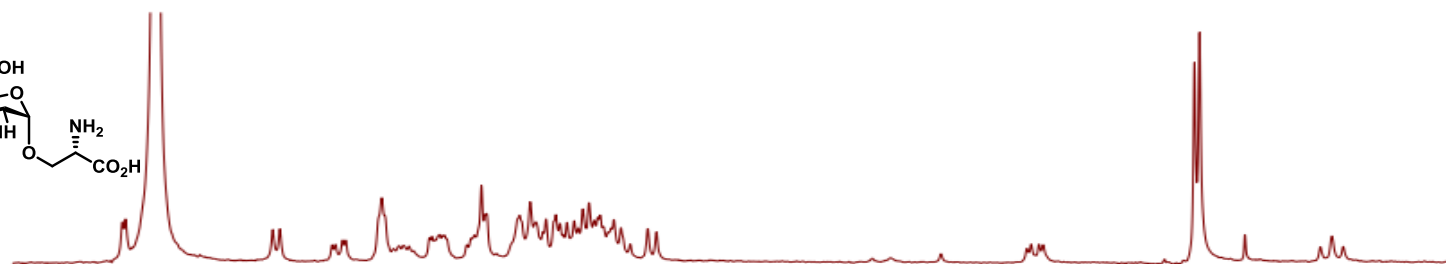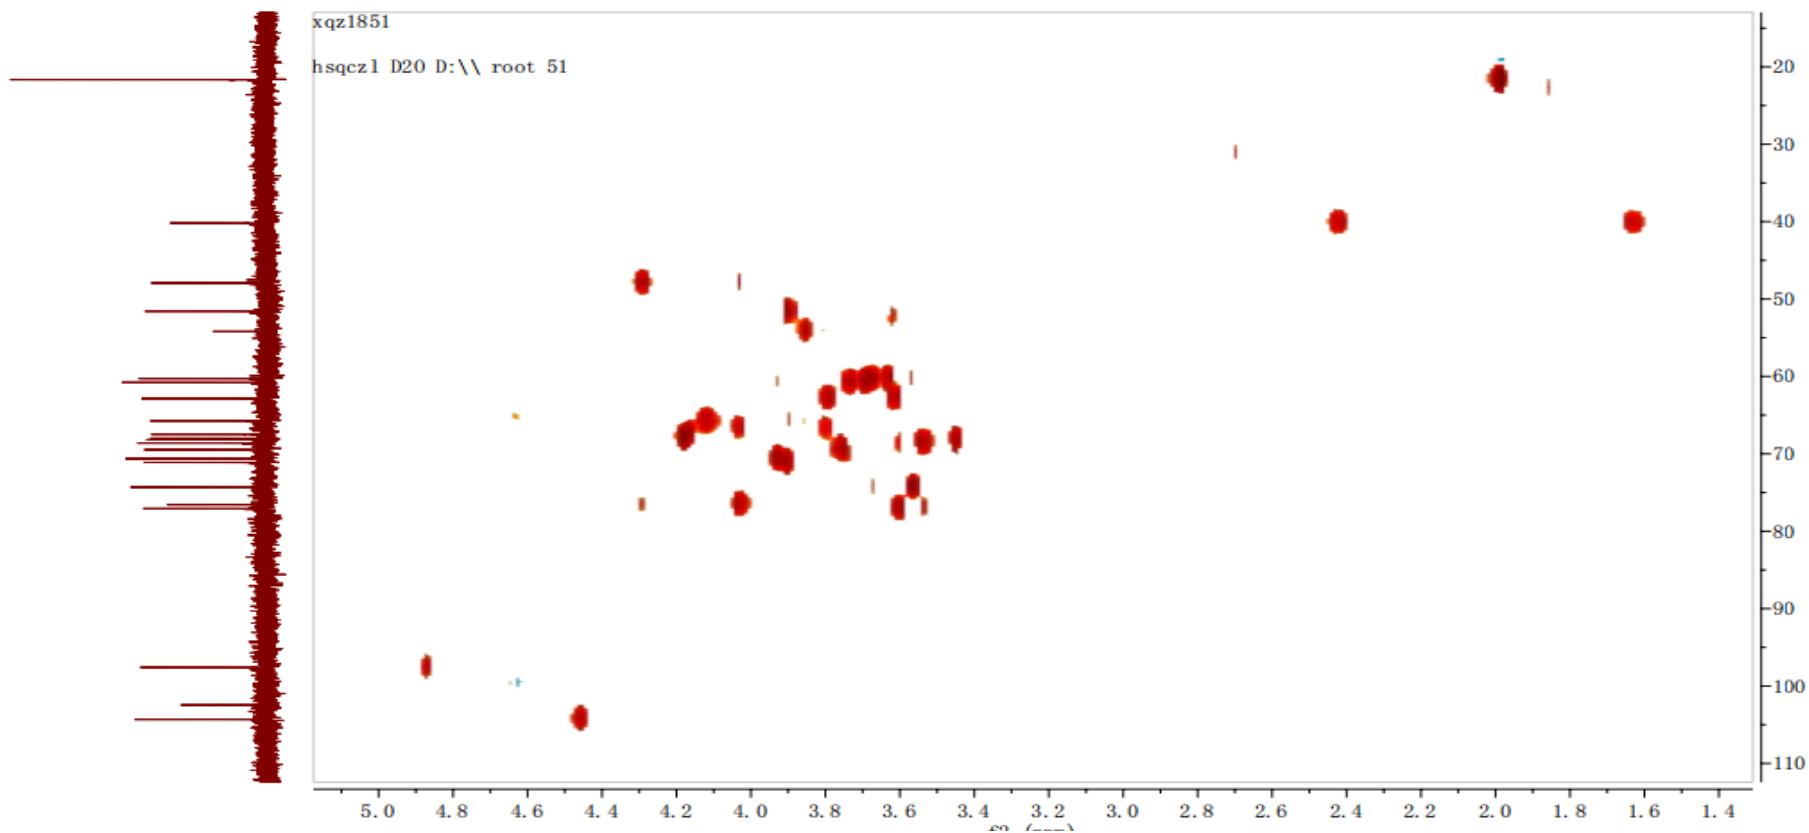

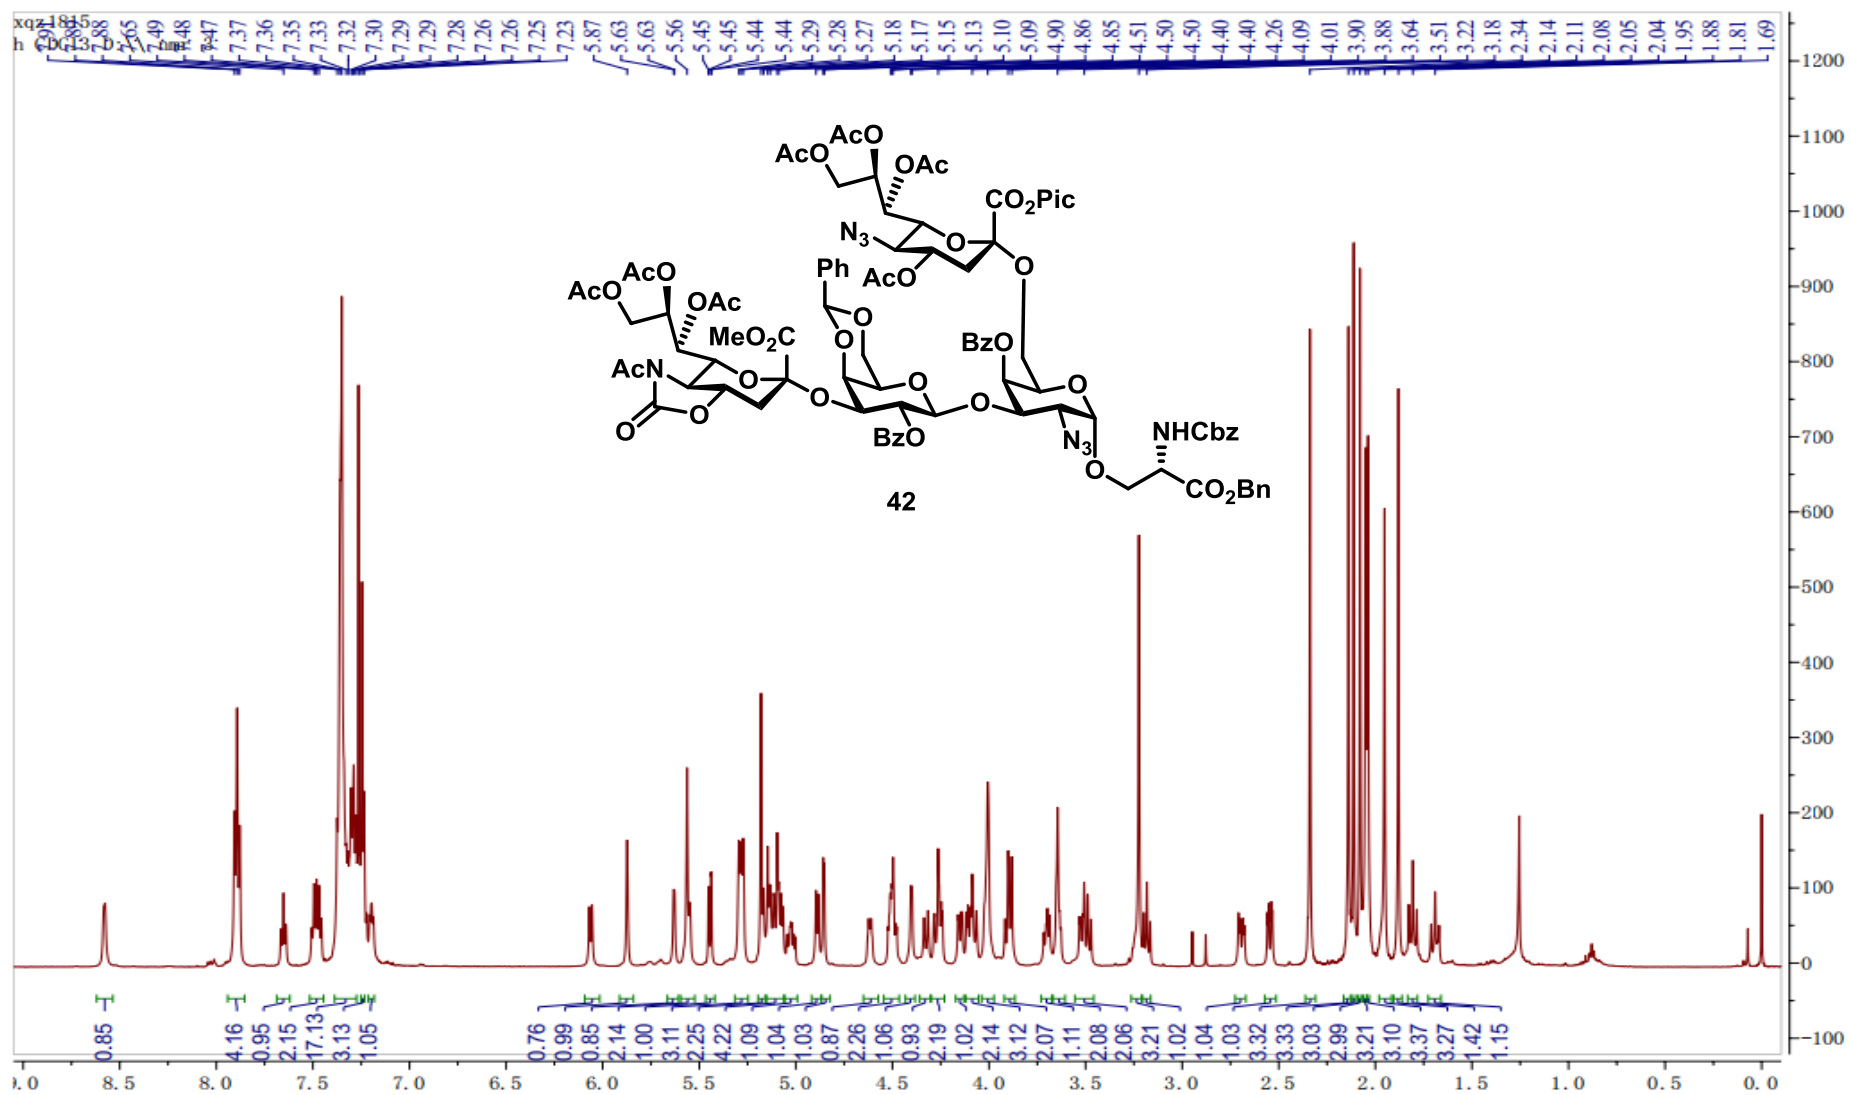



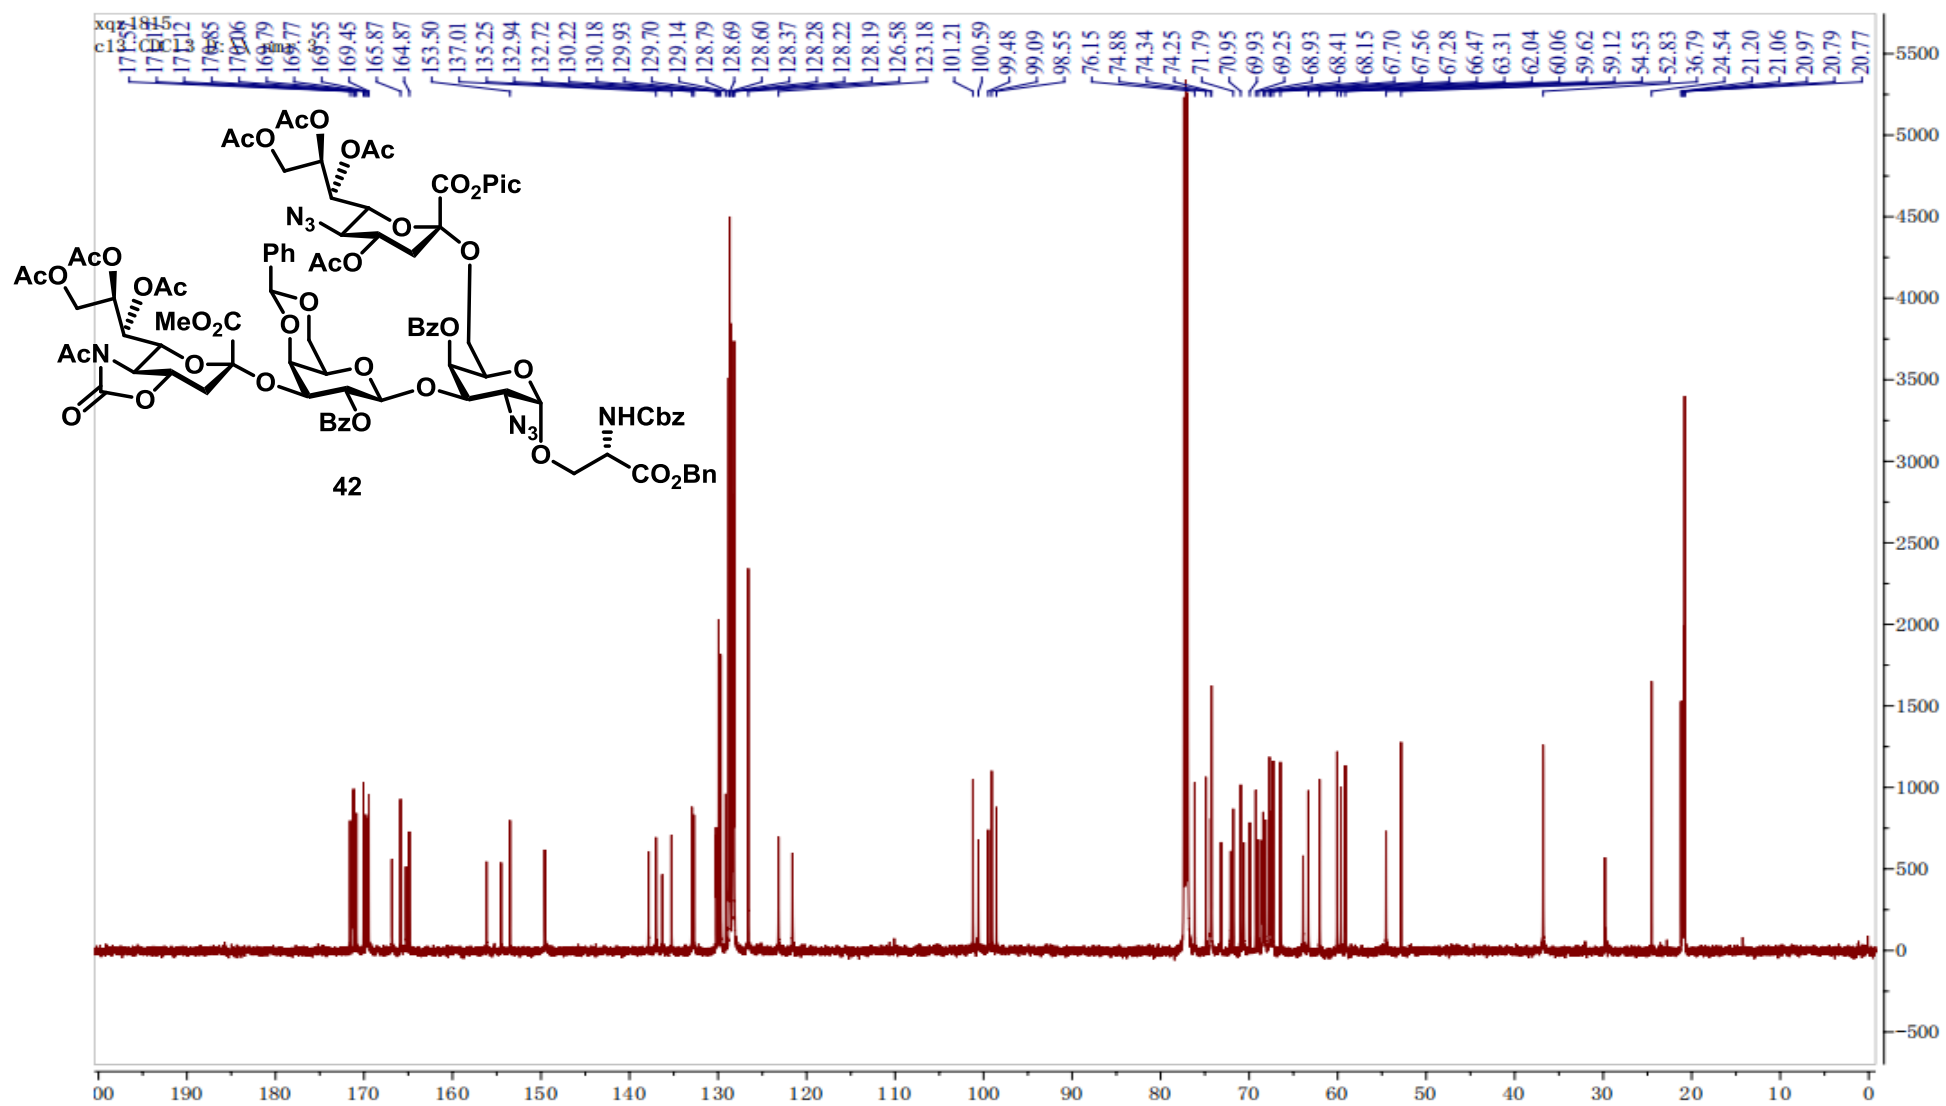

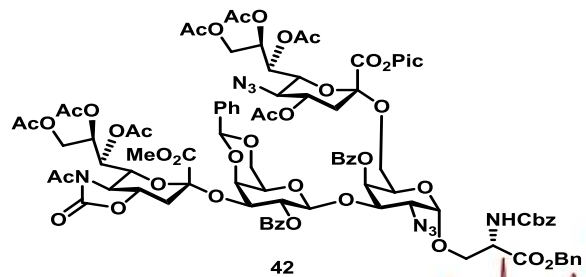

42

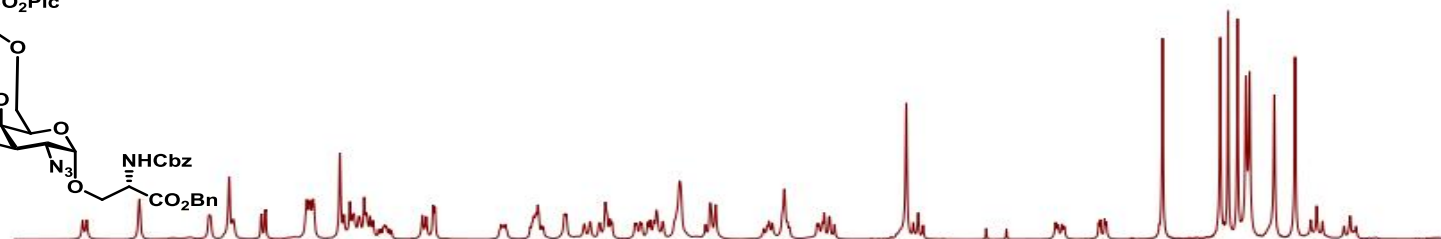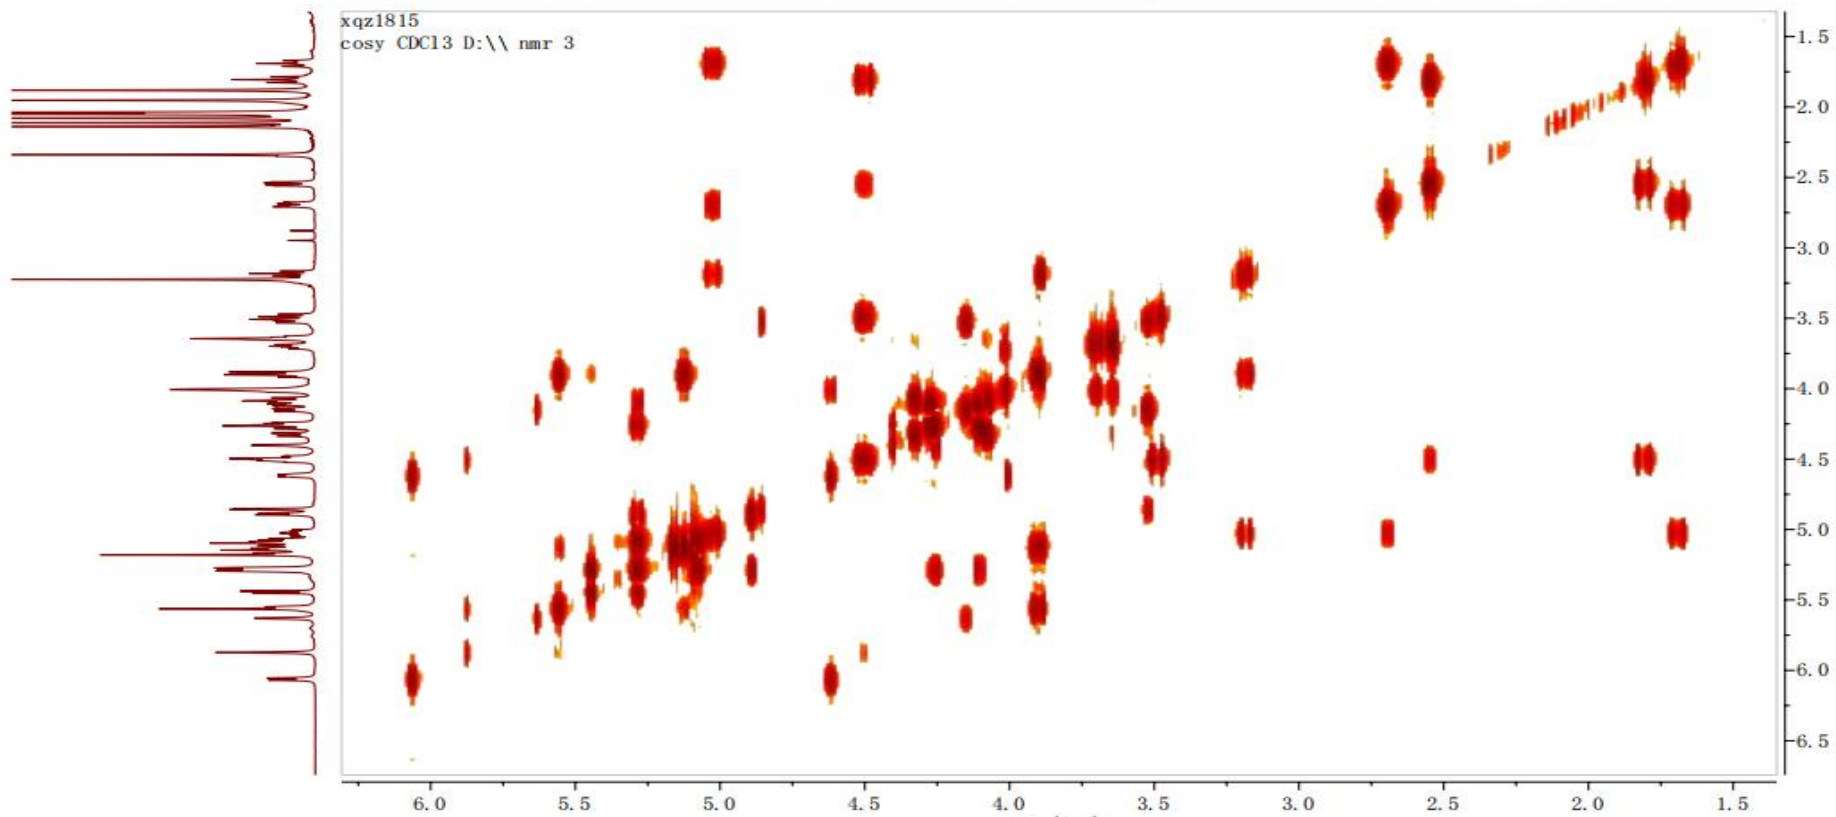

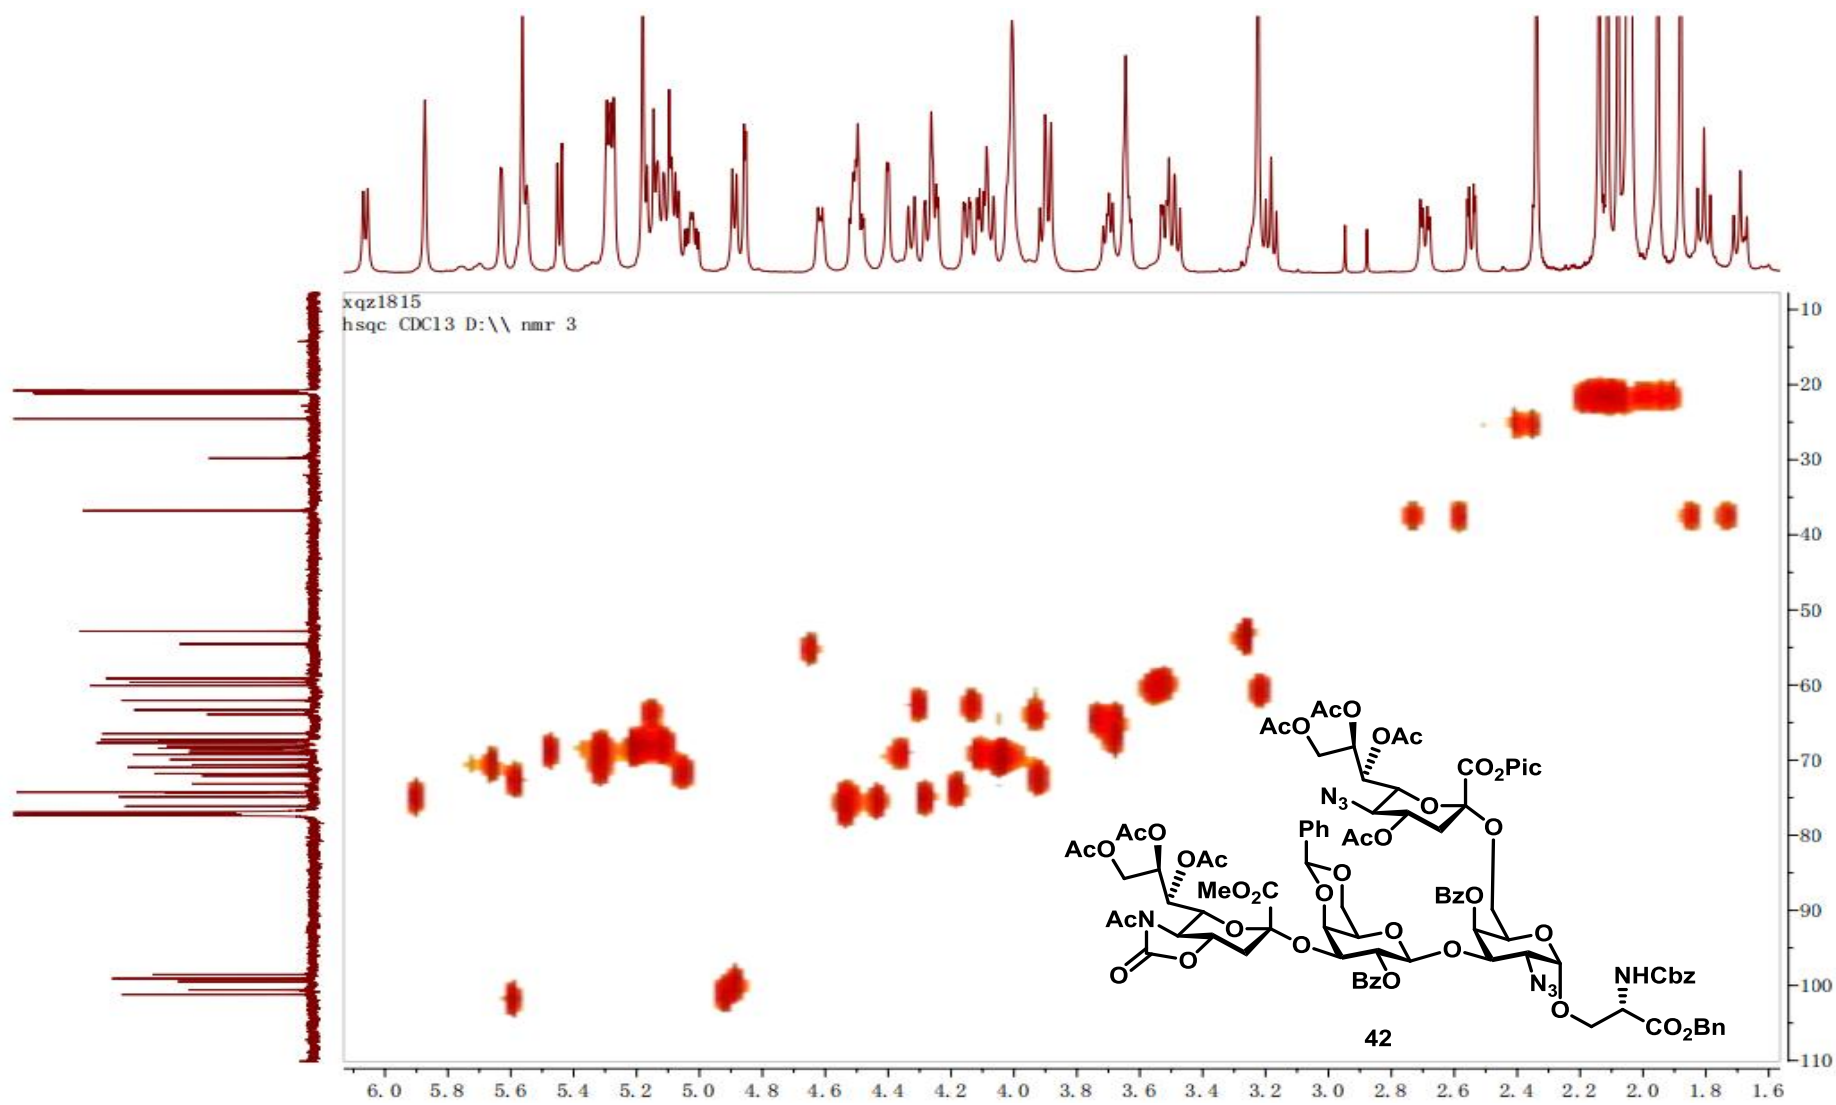

X-QZ-18-57-2  
X-QZ-18-57-2  
PROTON D20 E:\\ xiaoguozi 22

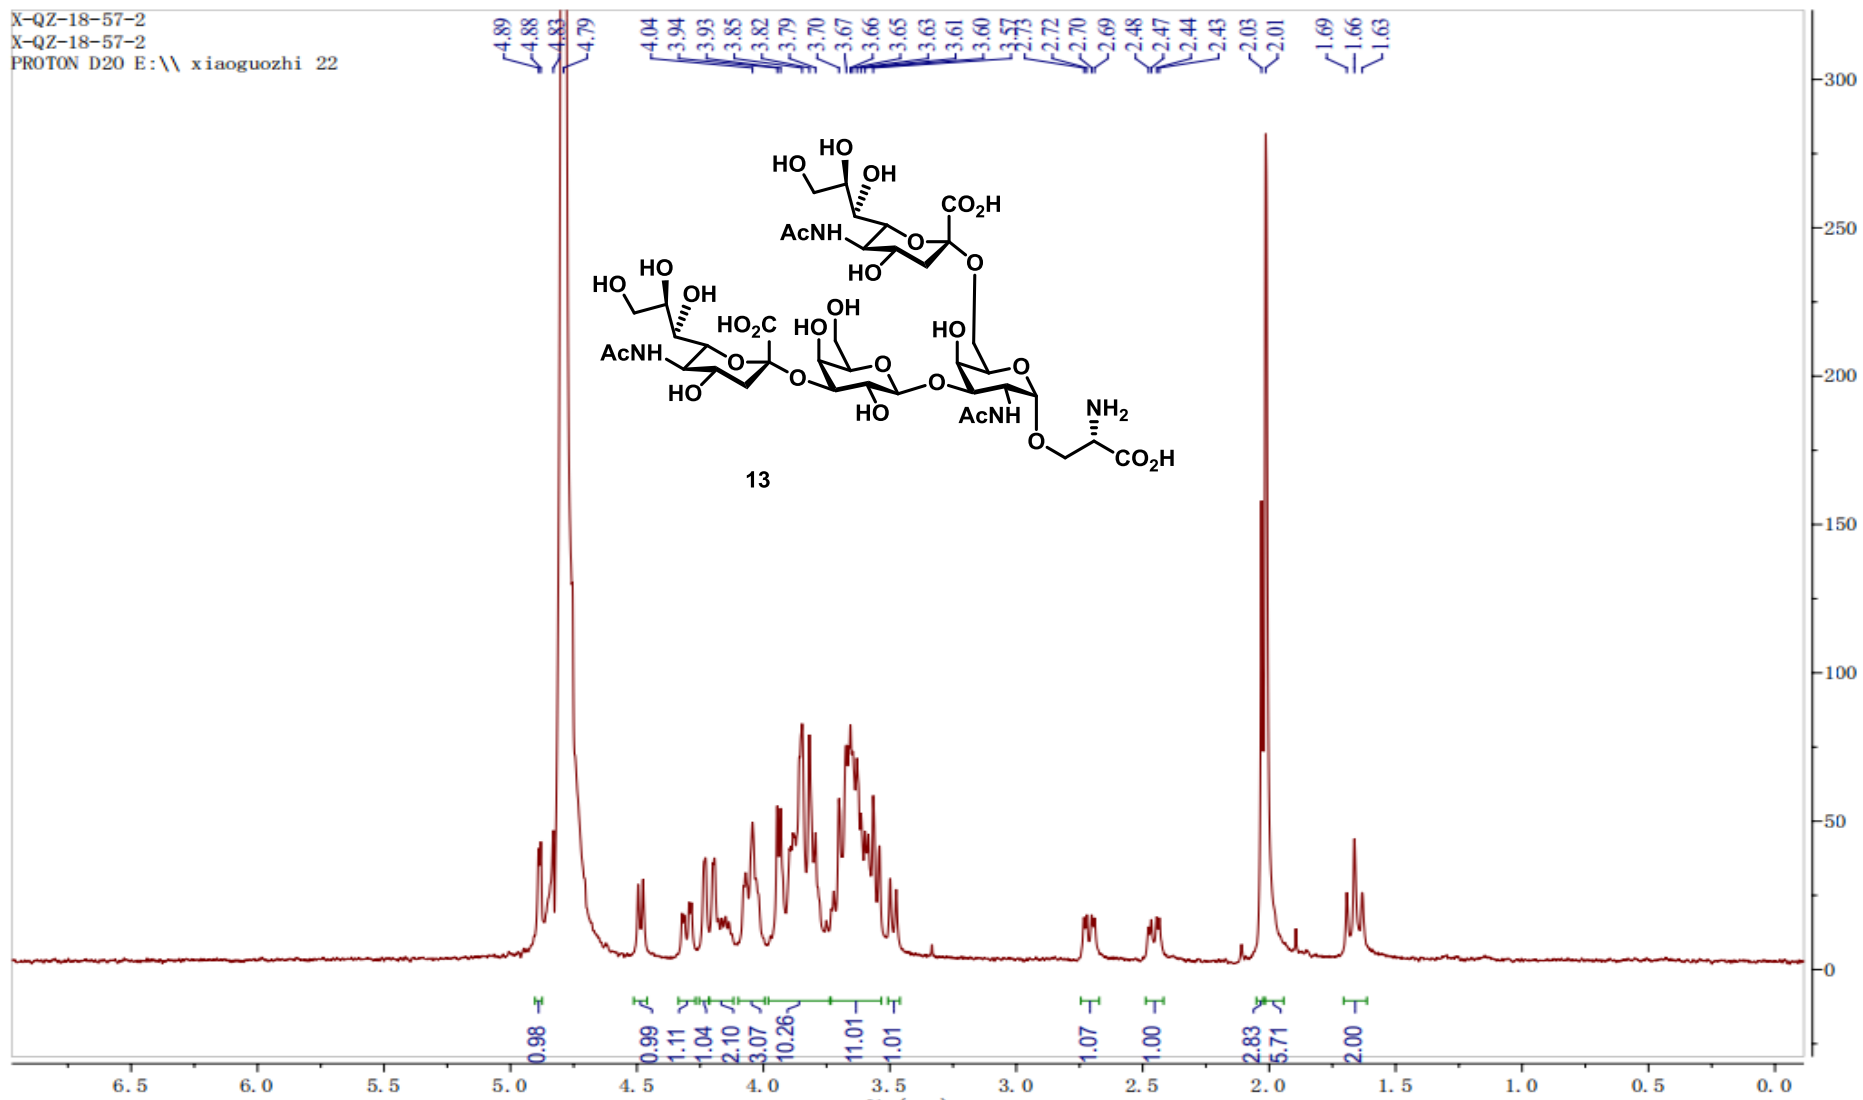

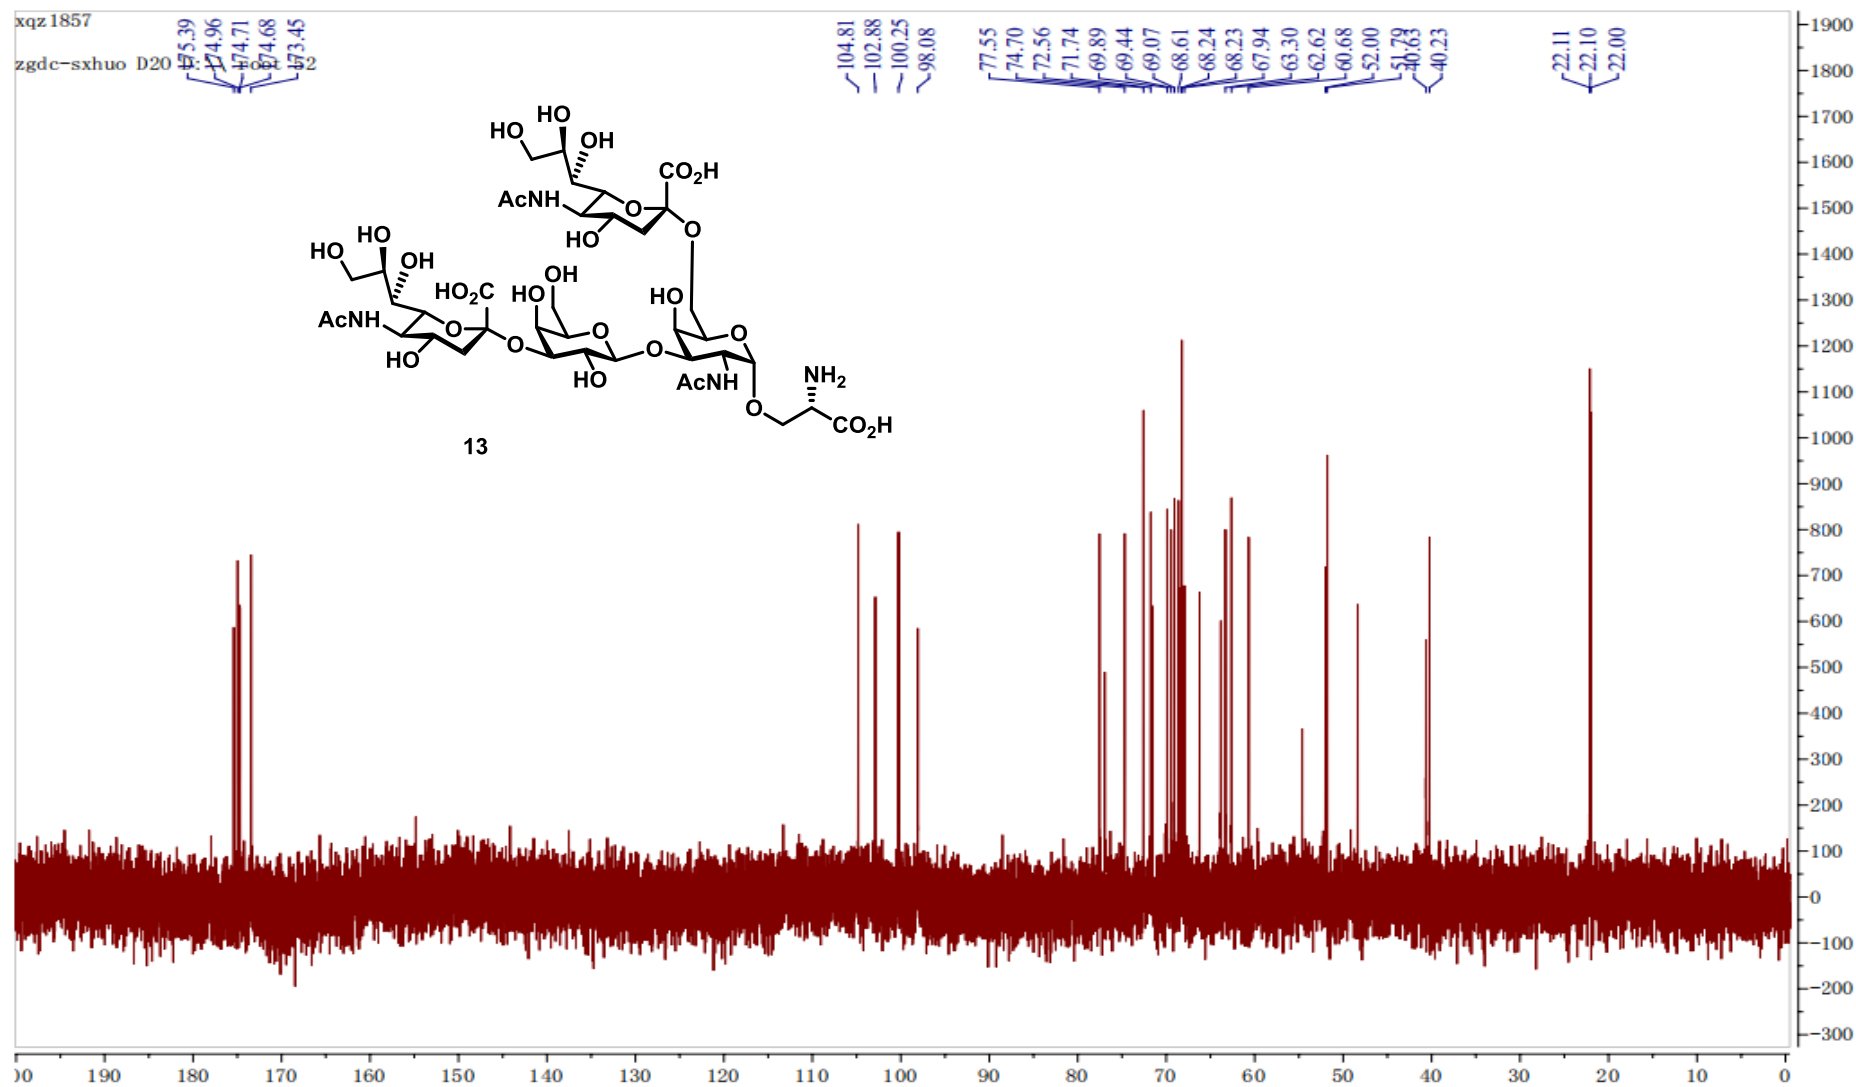

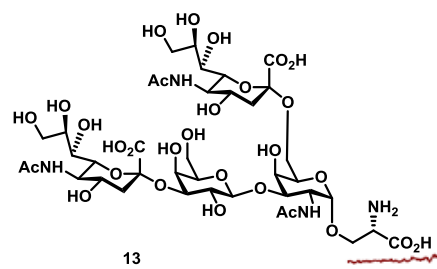

13

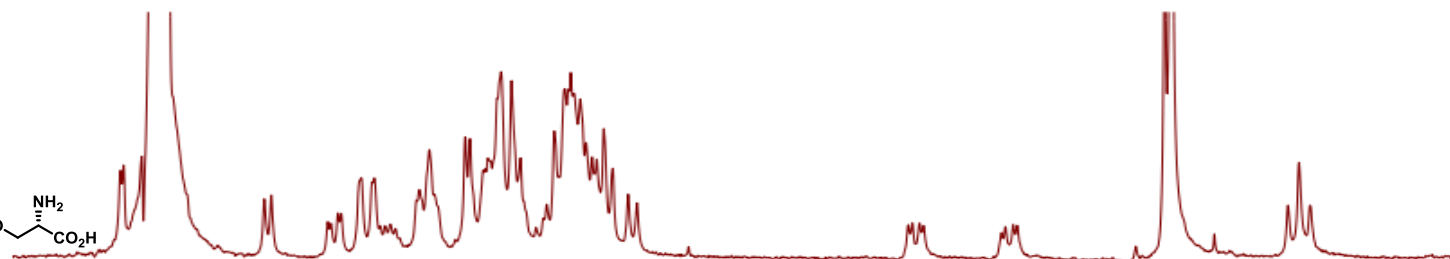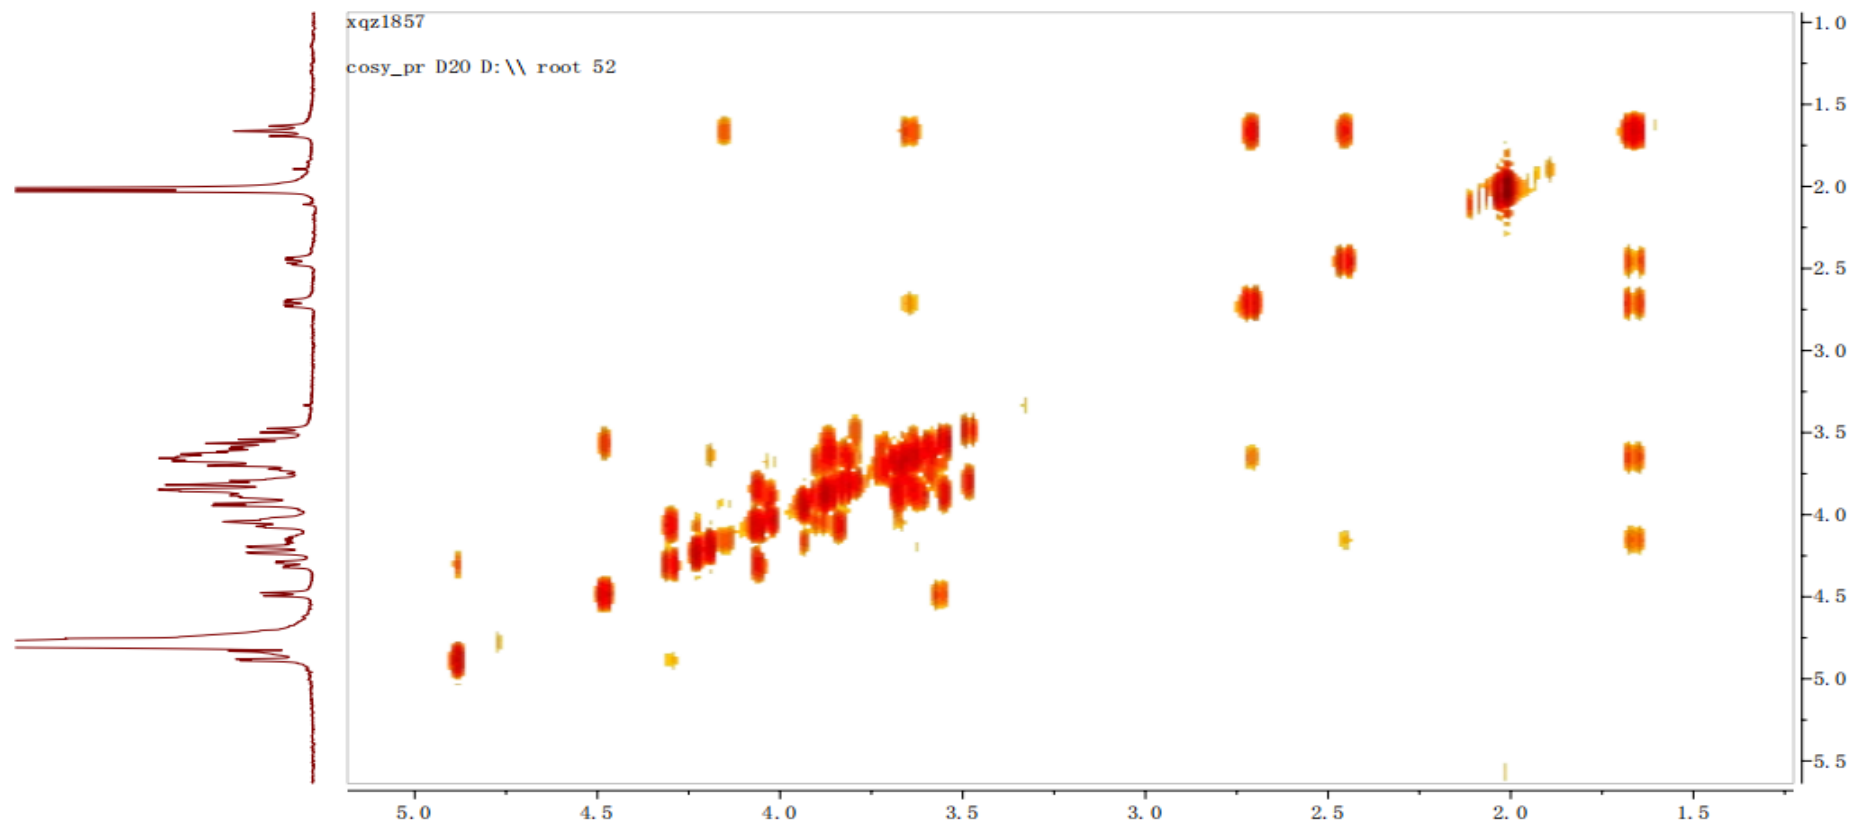

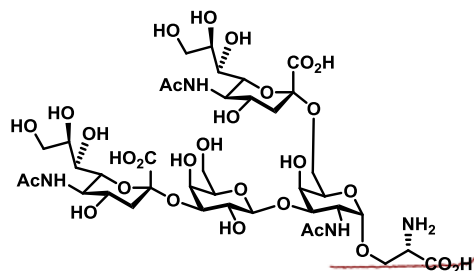

13

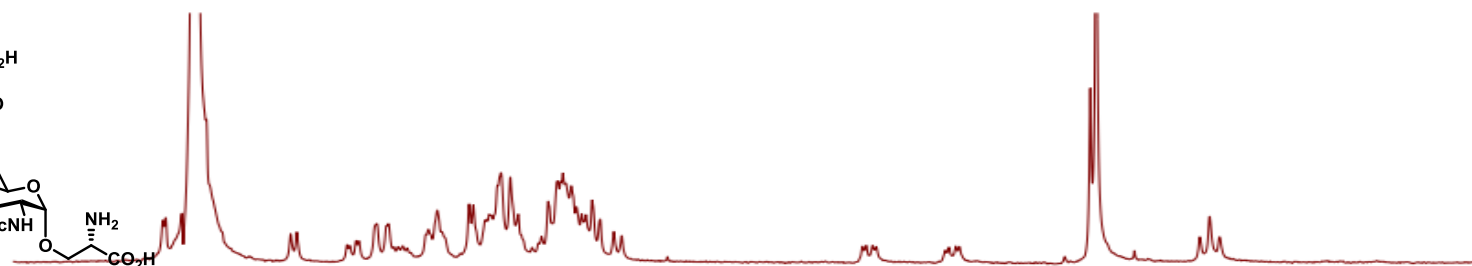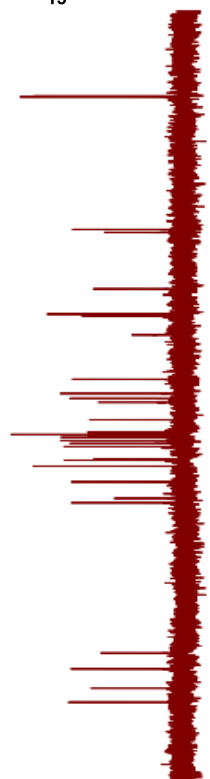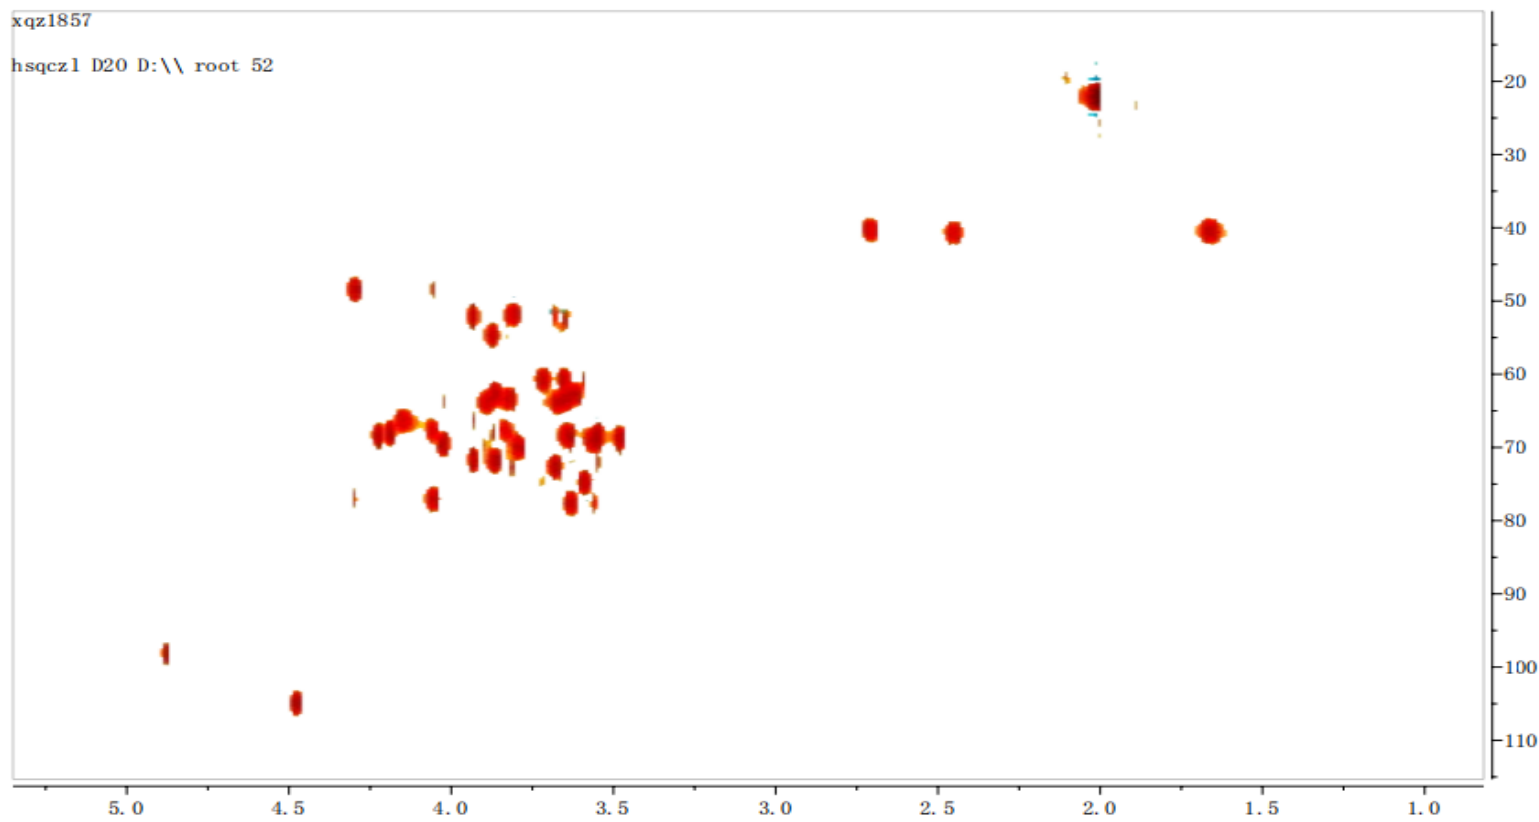

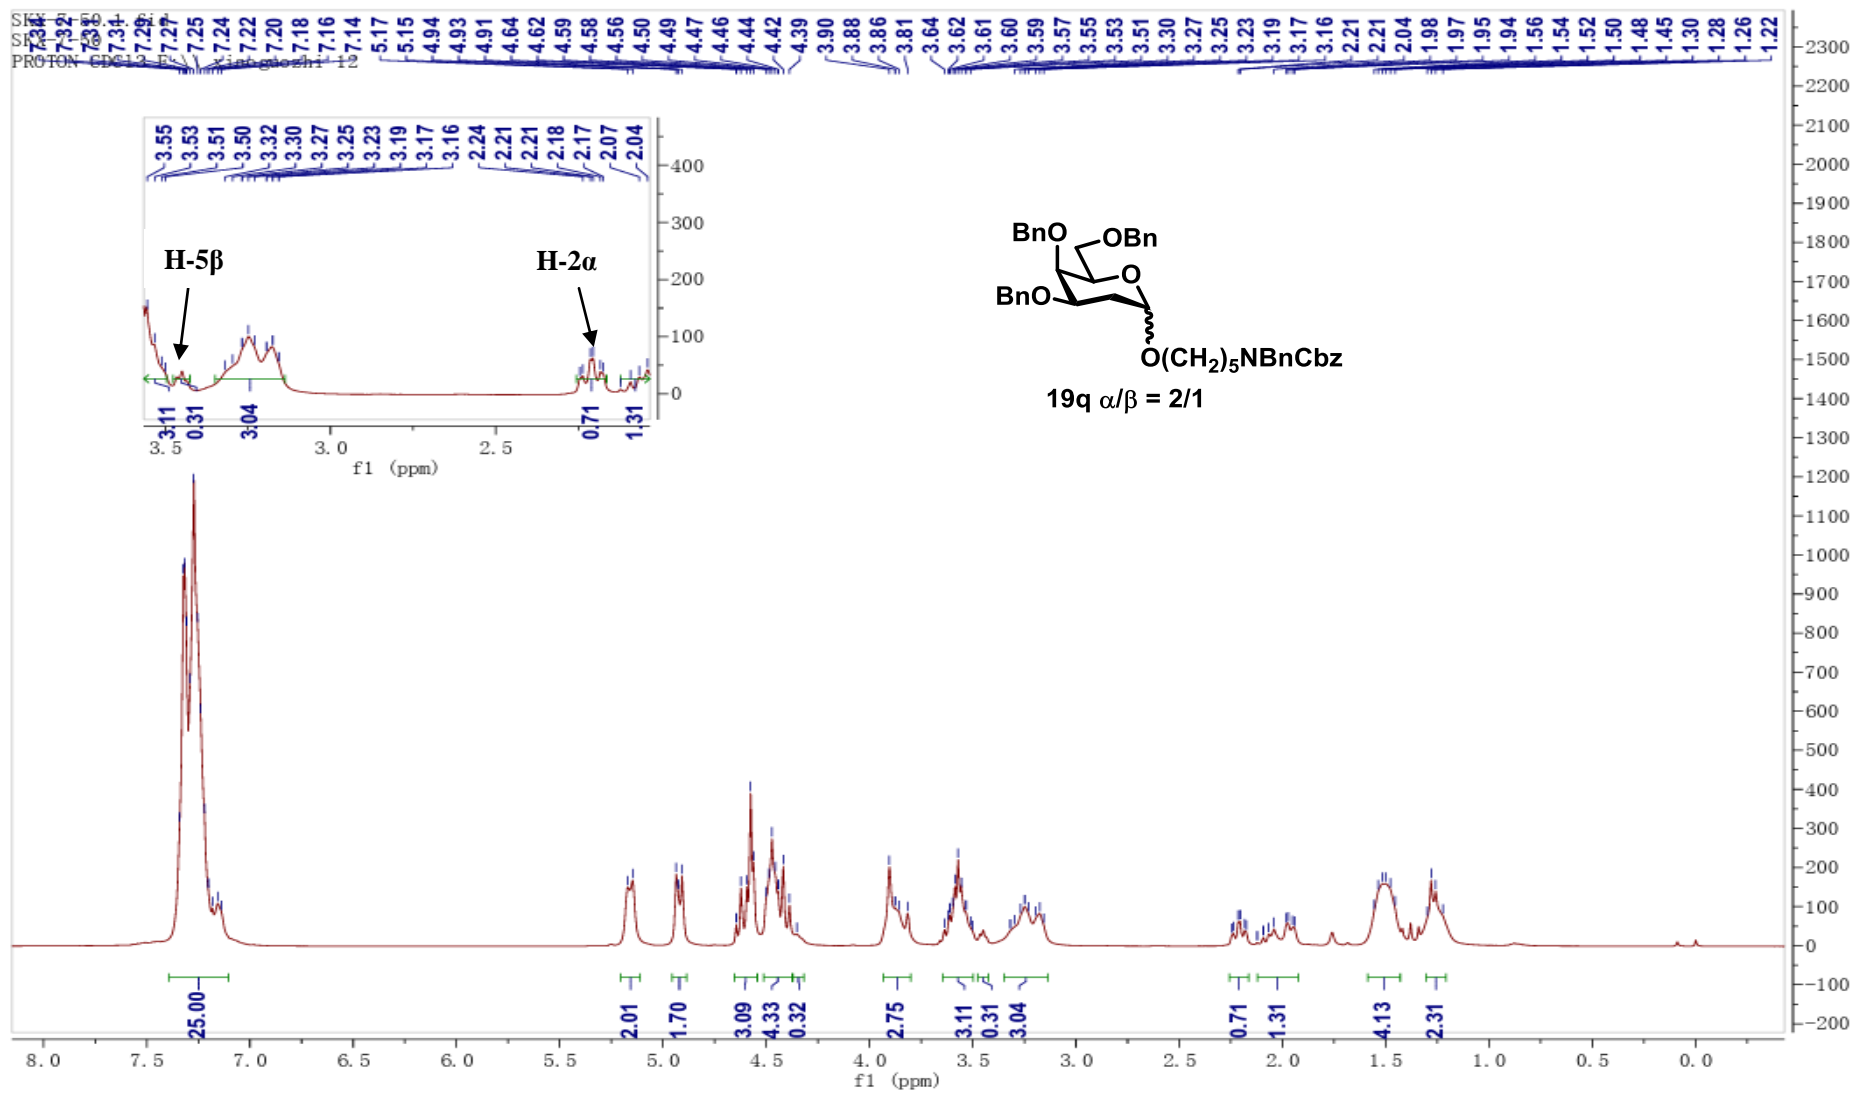



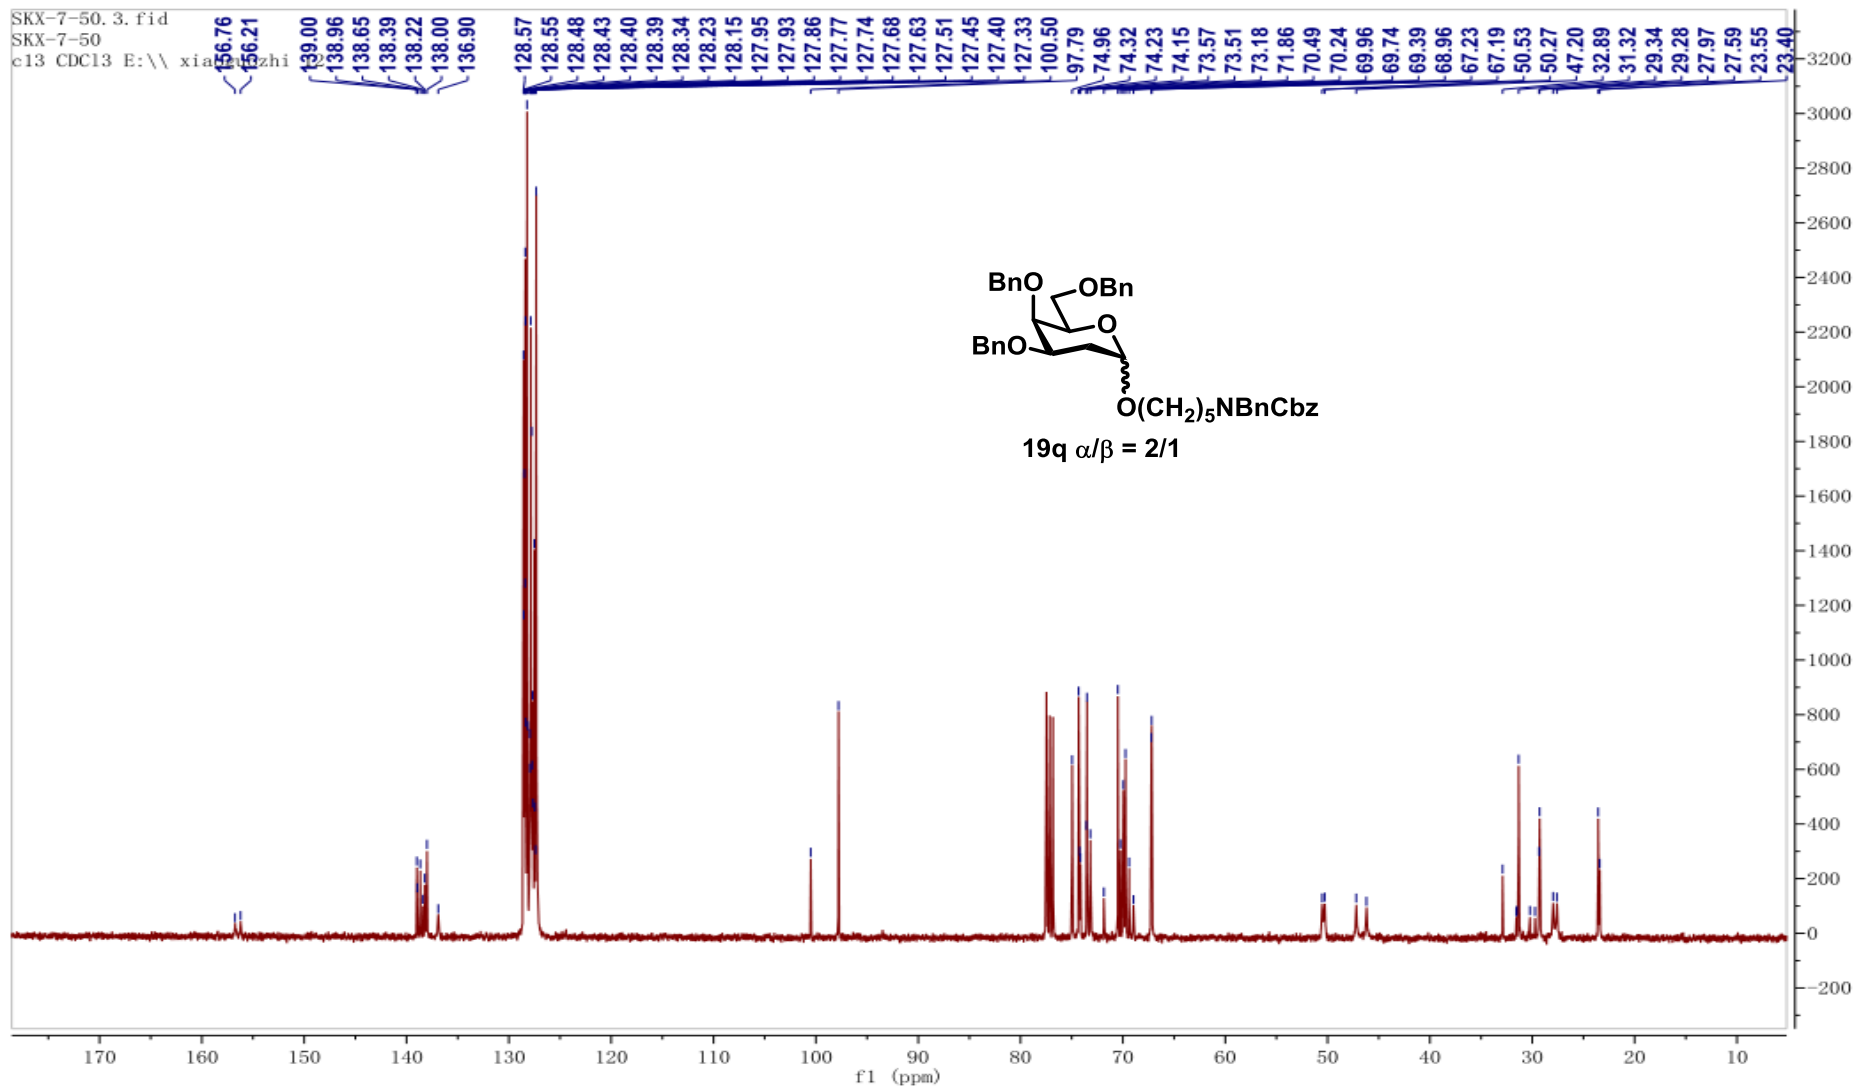

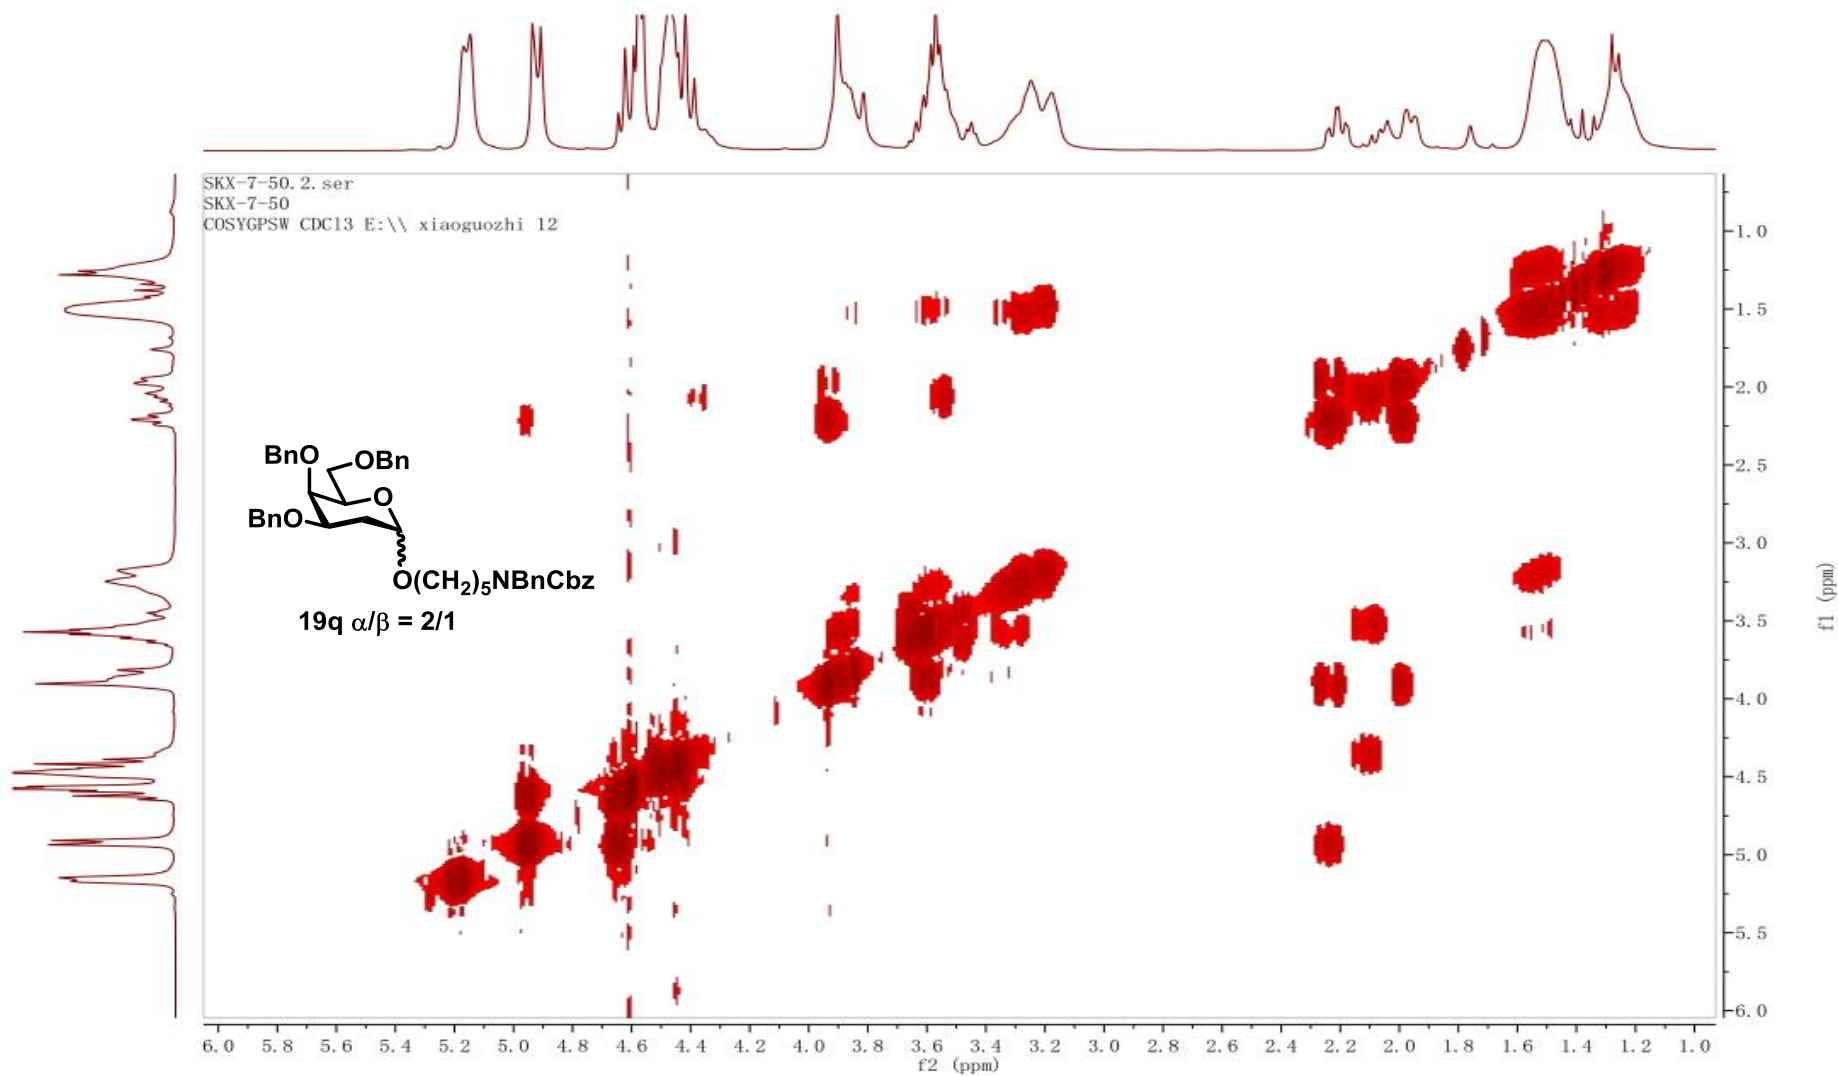

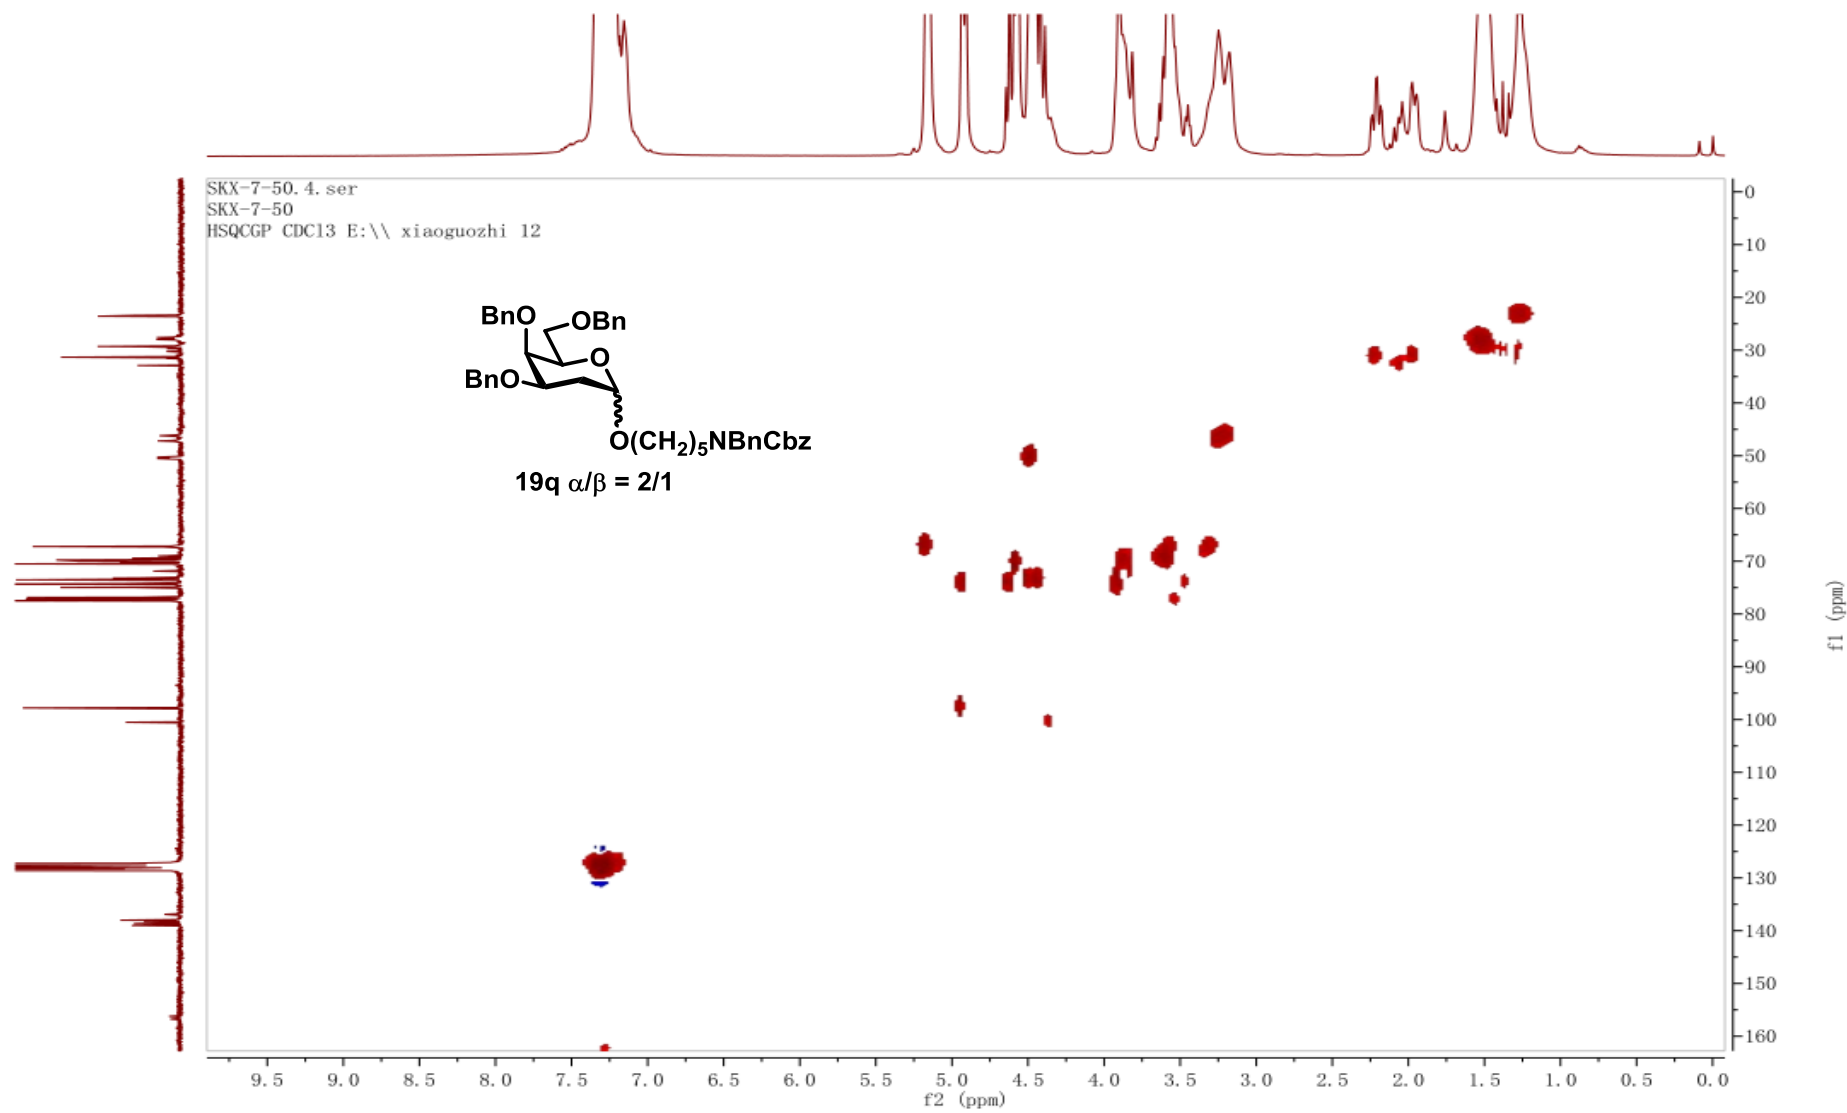

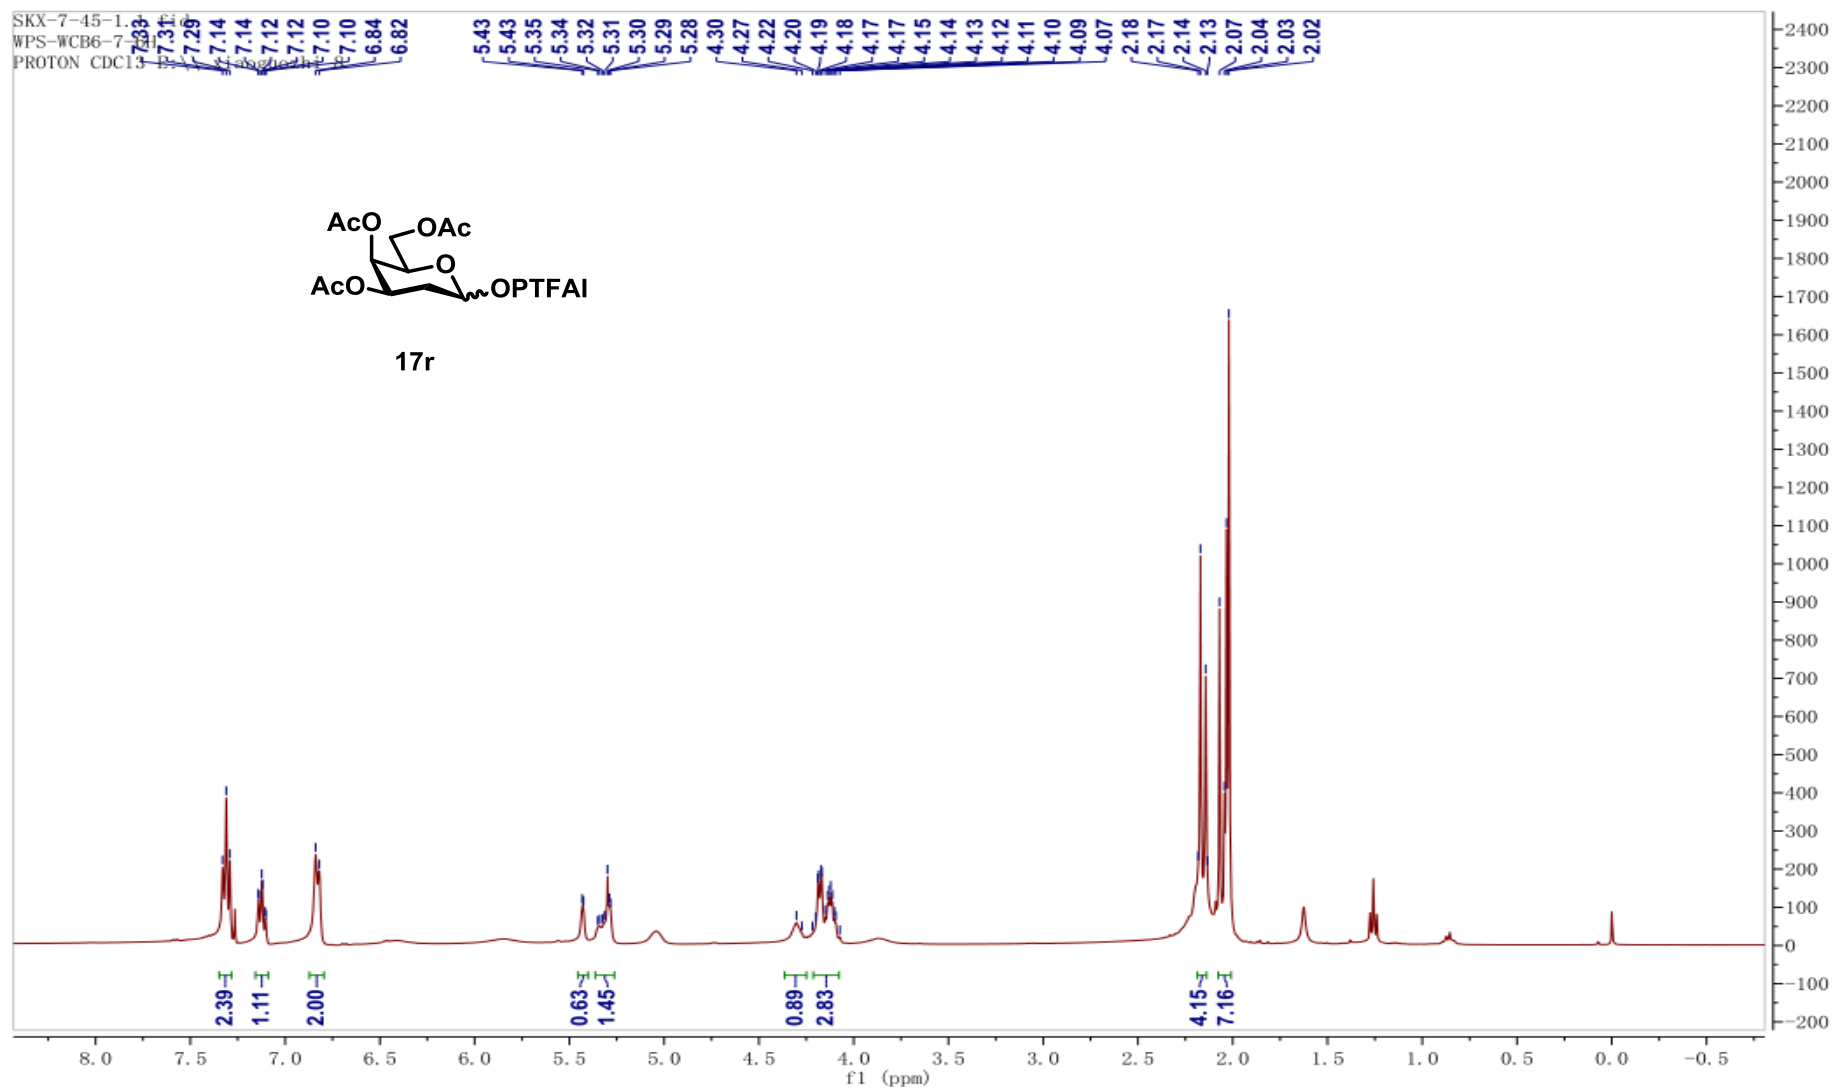

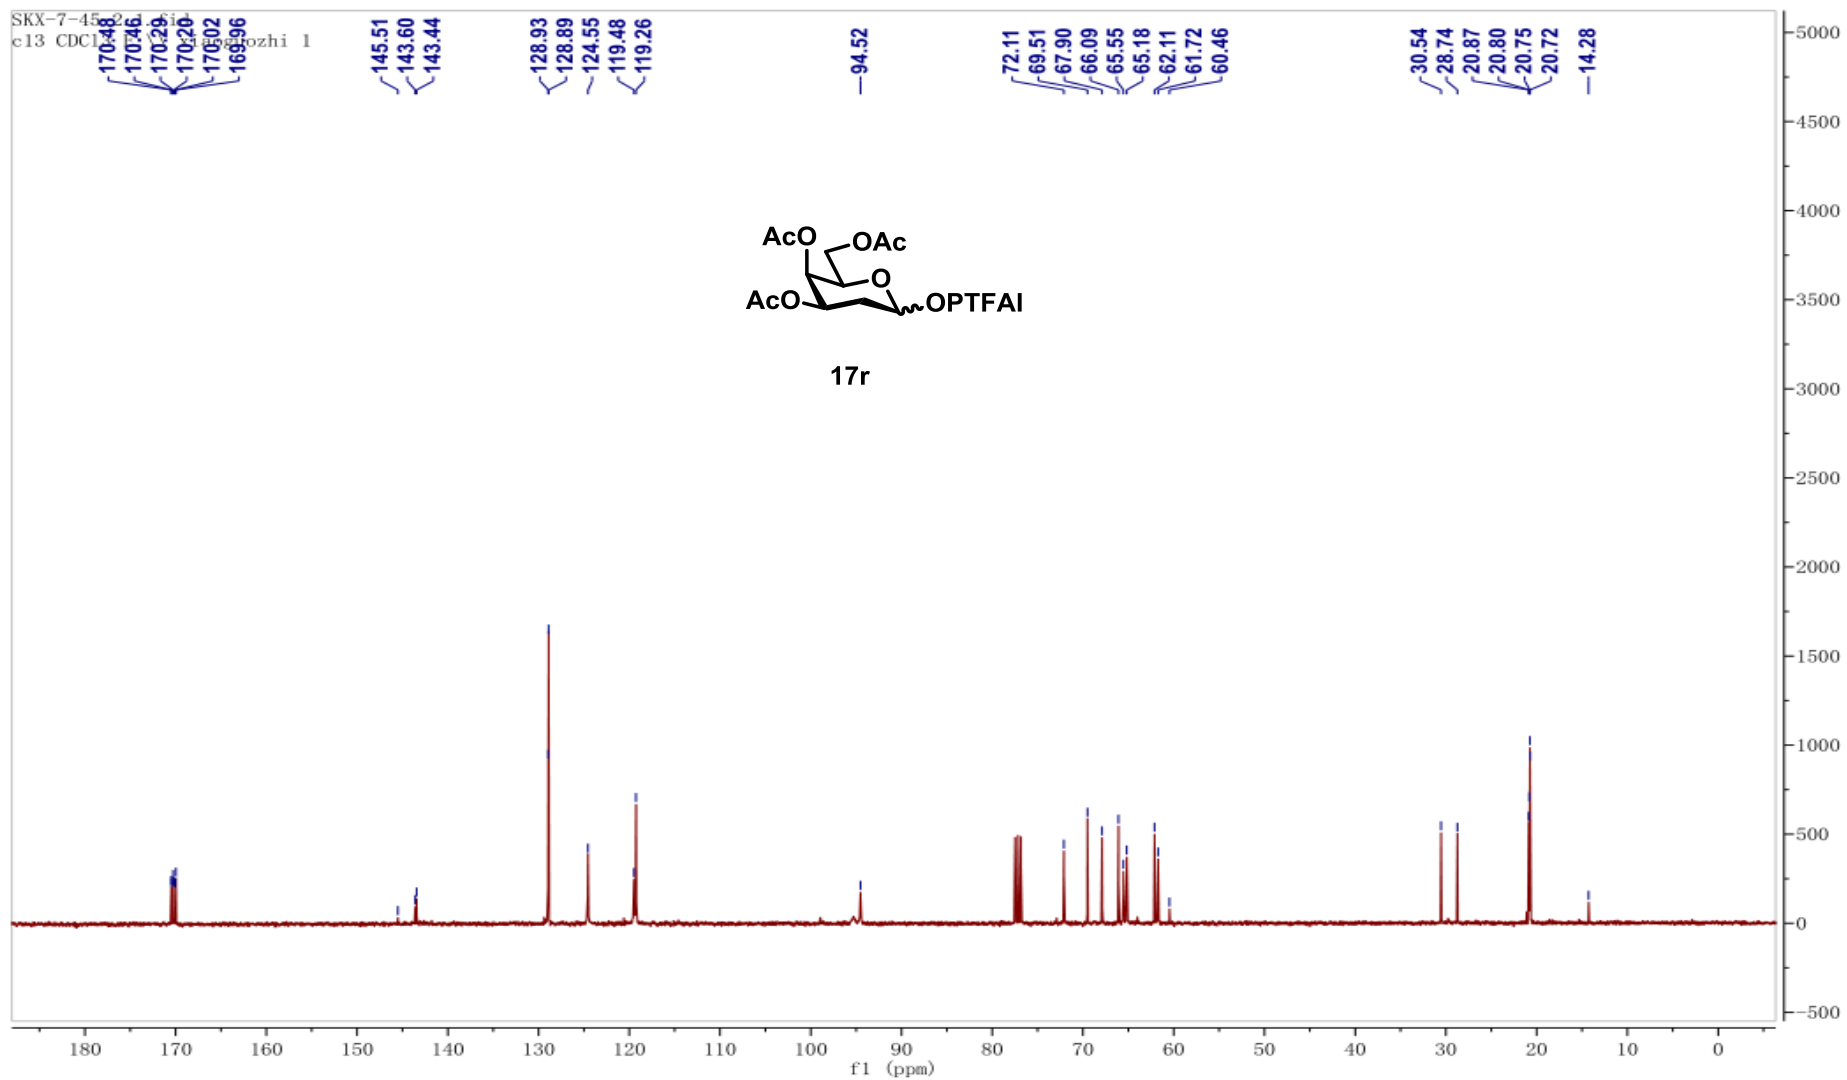

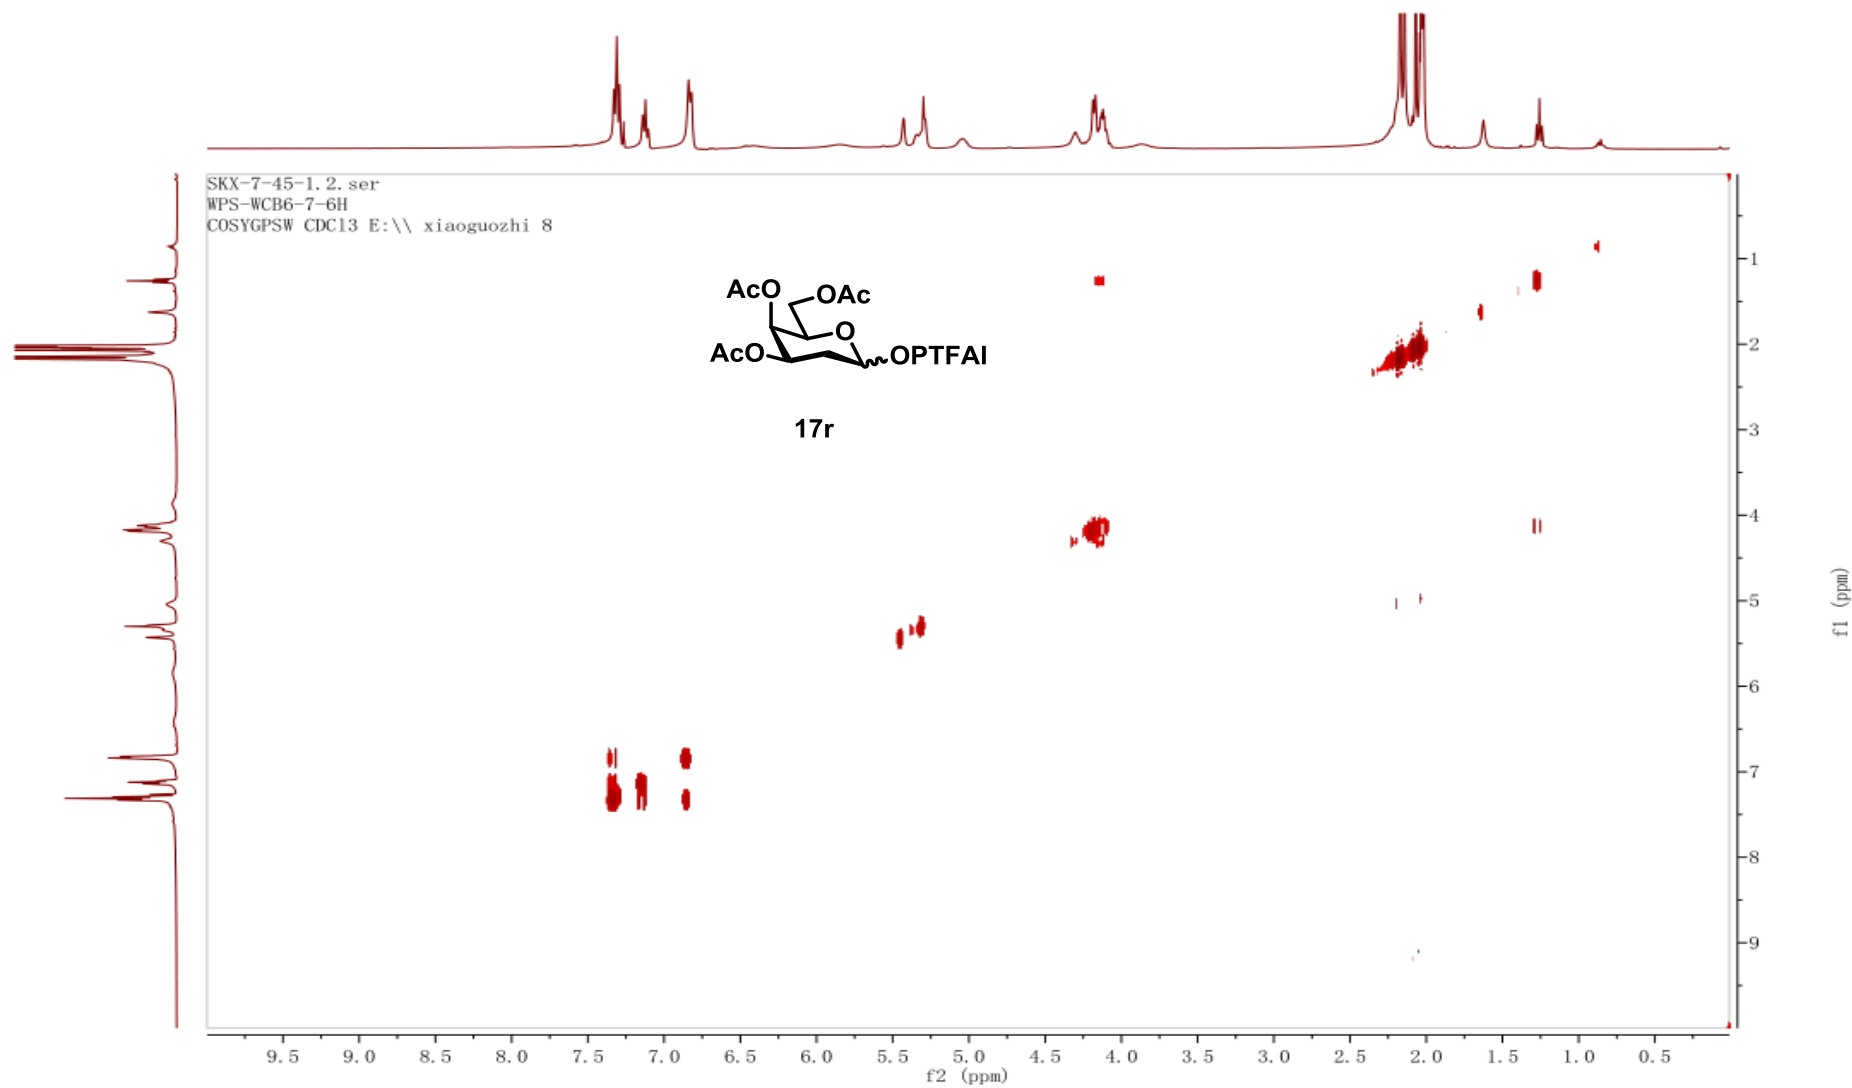

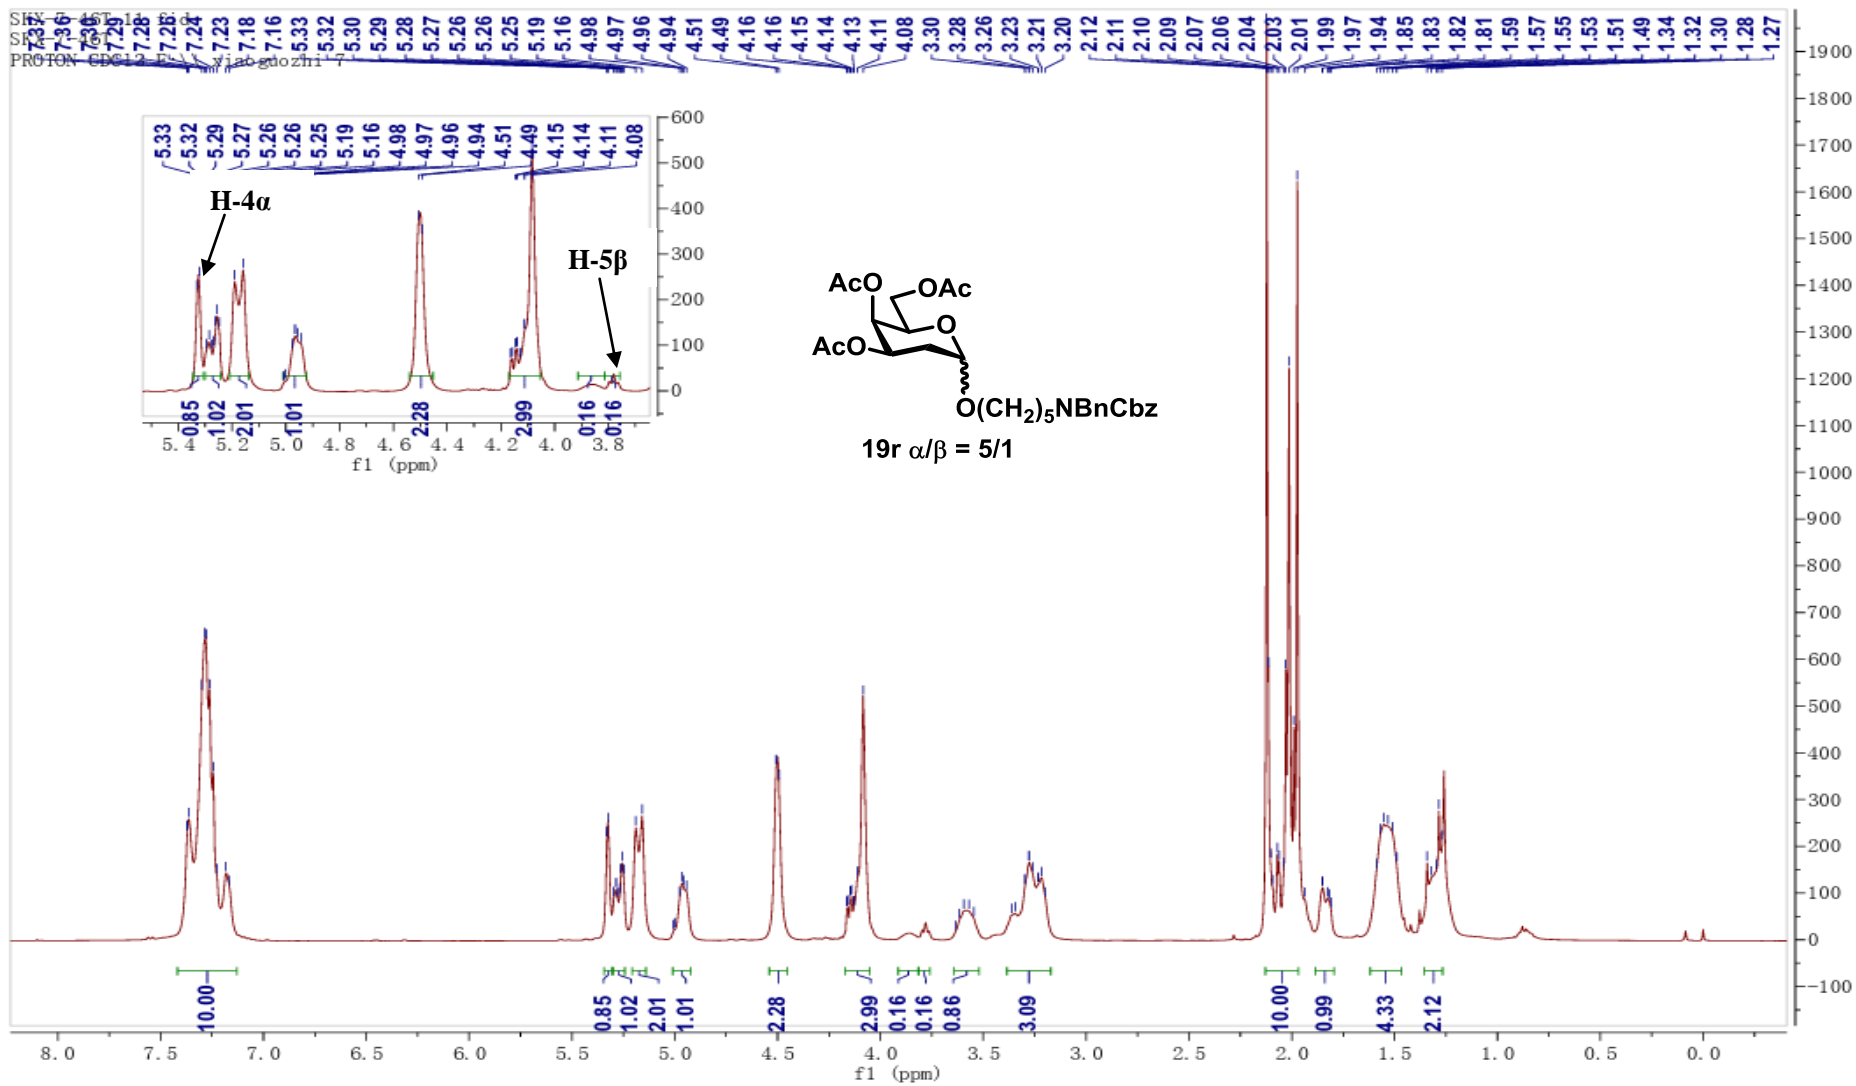

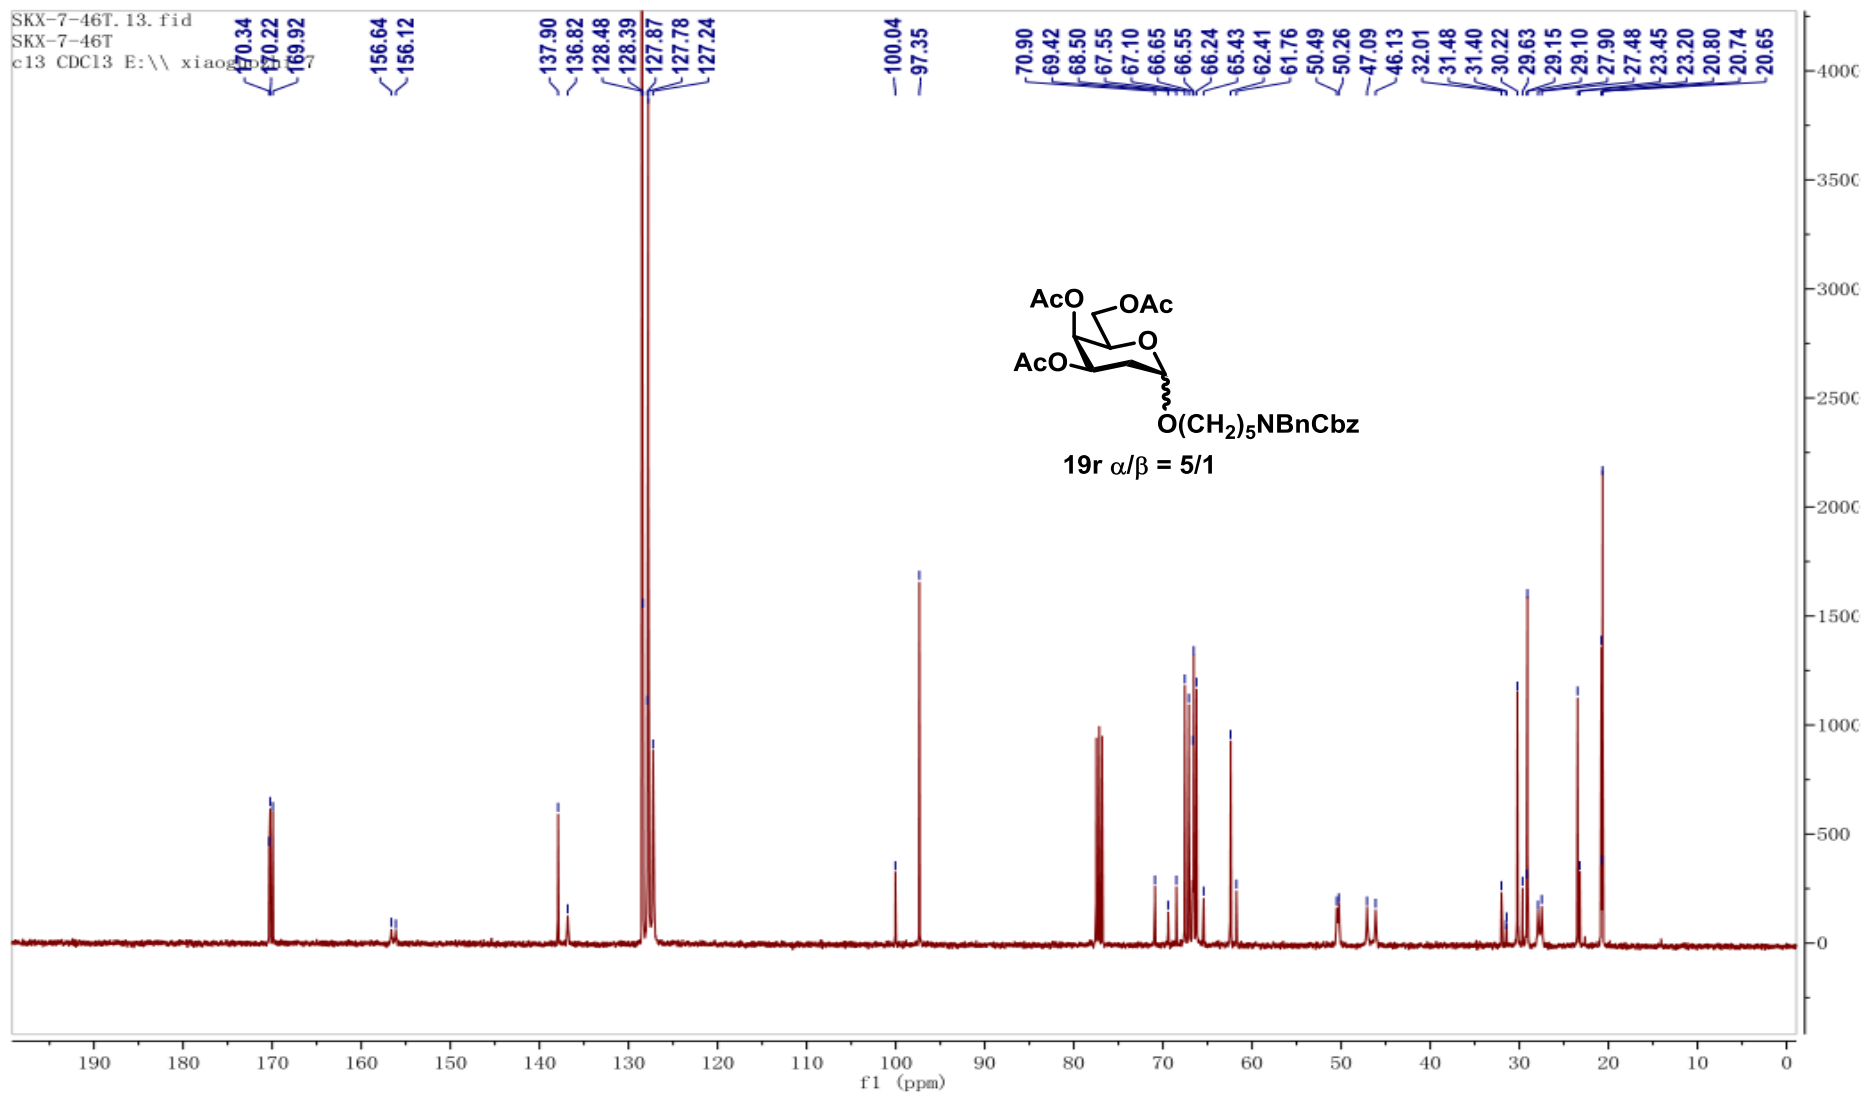



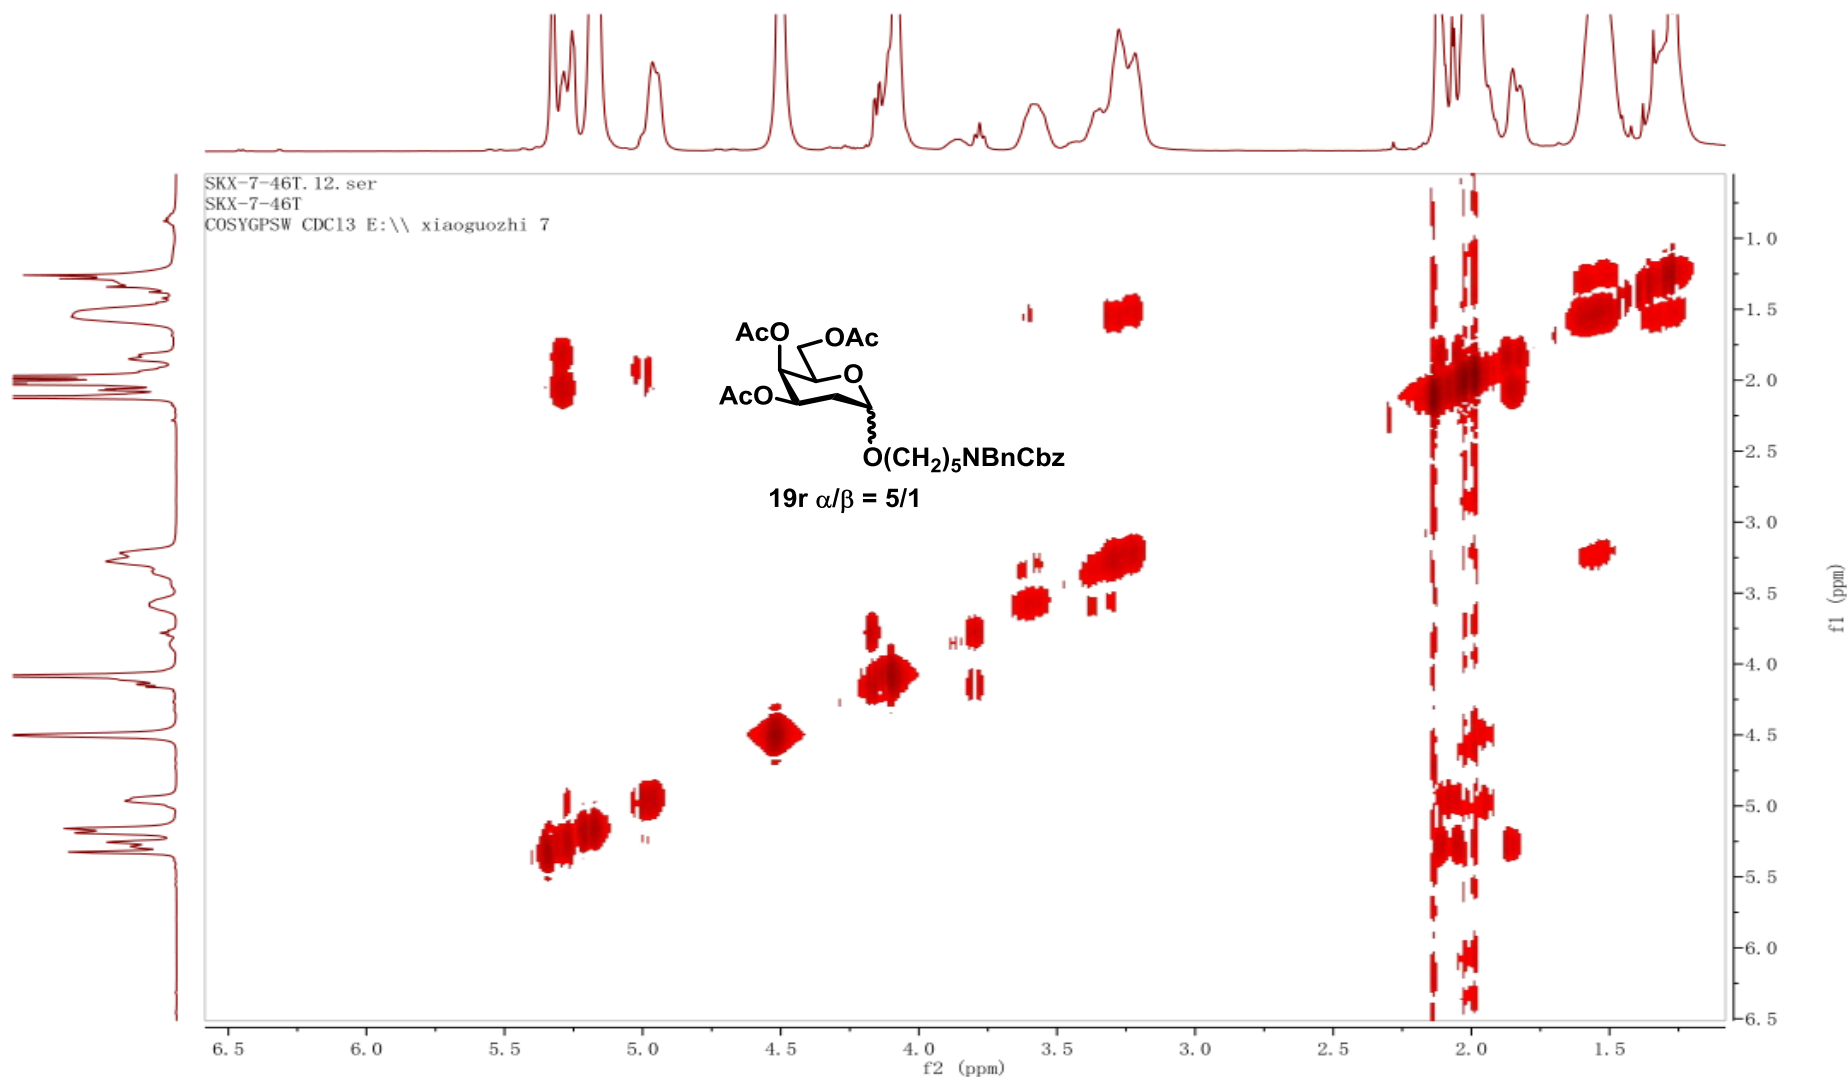

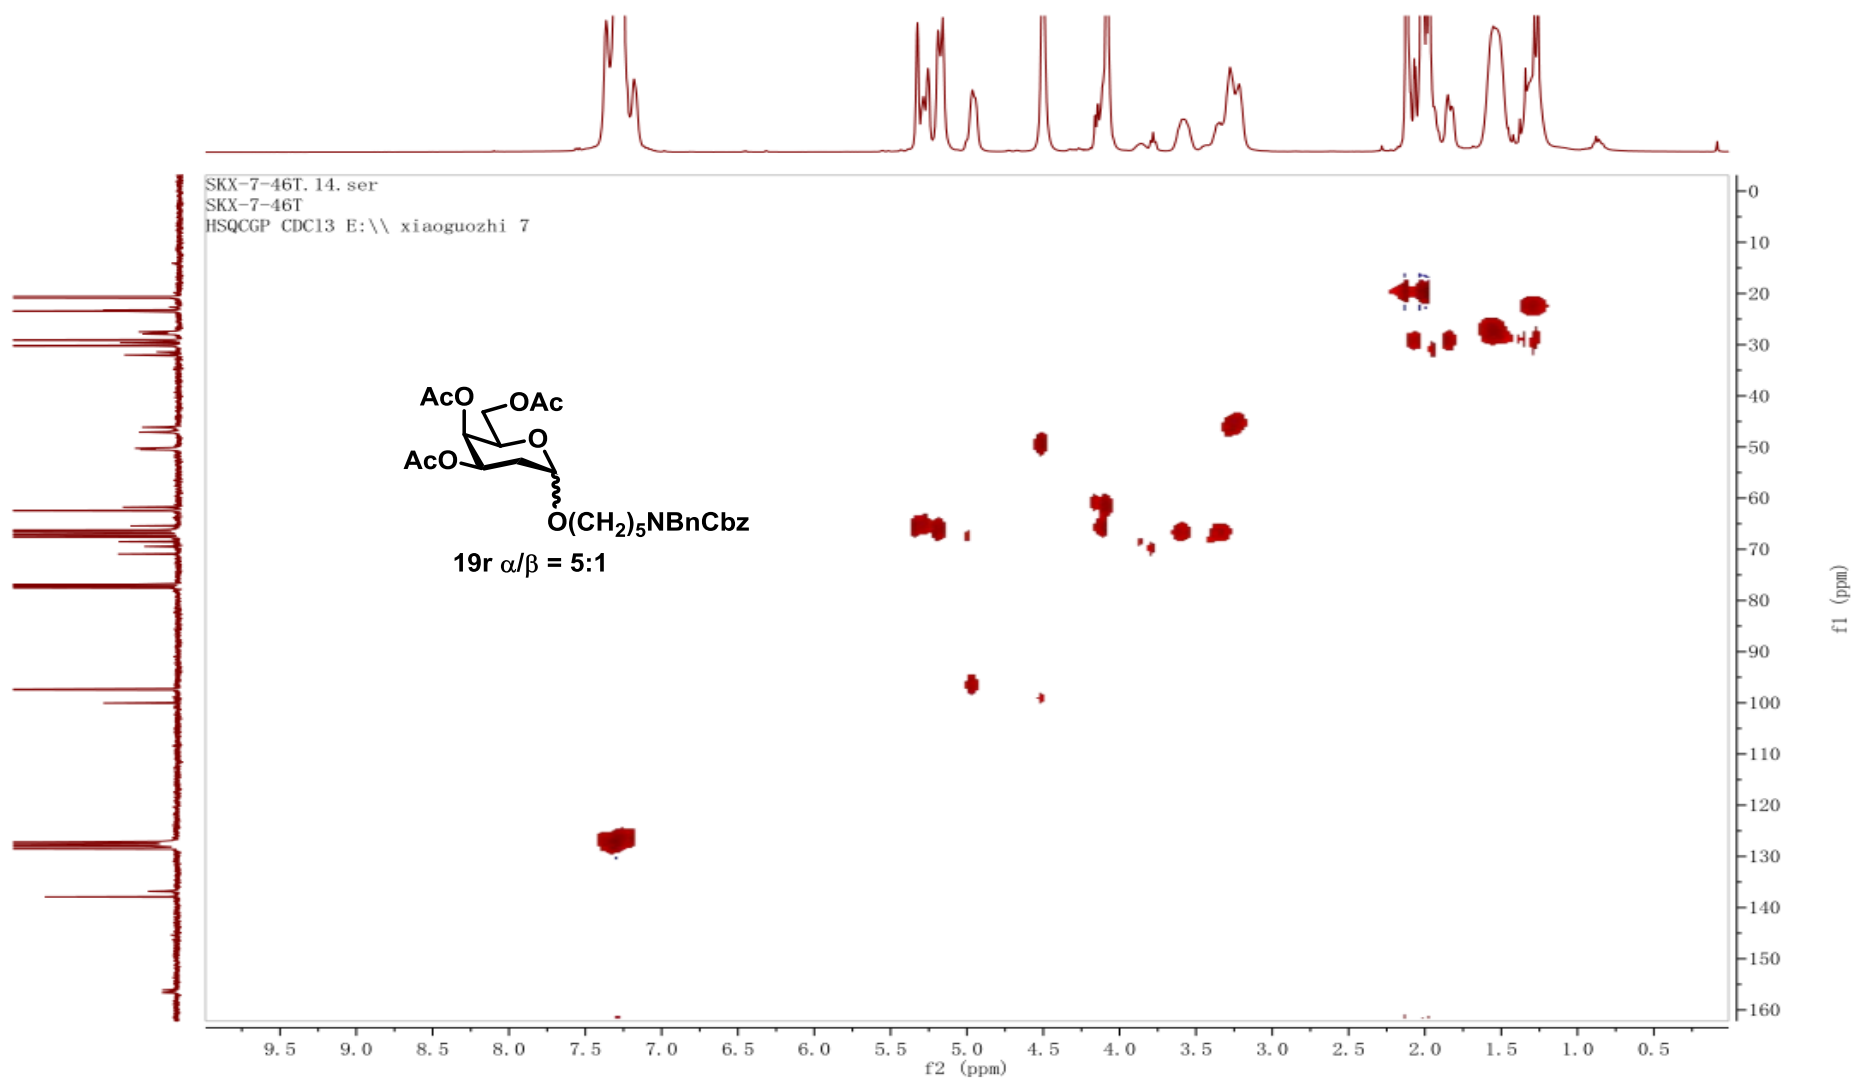

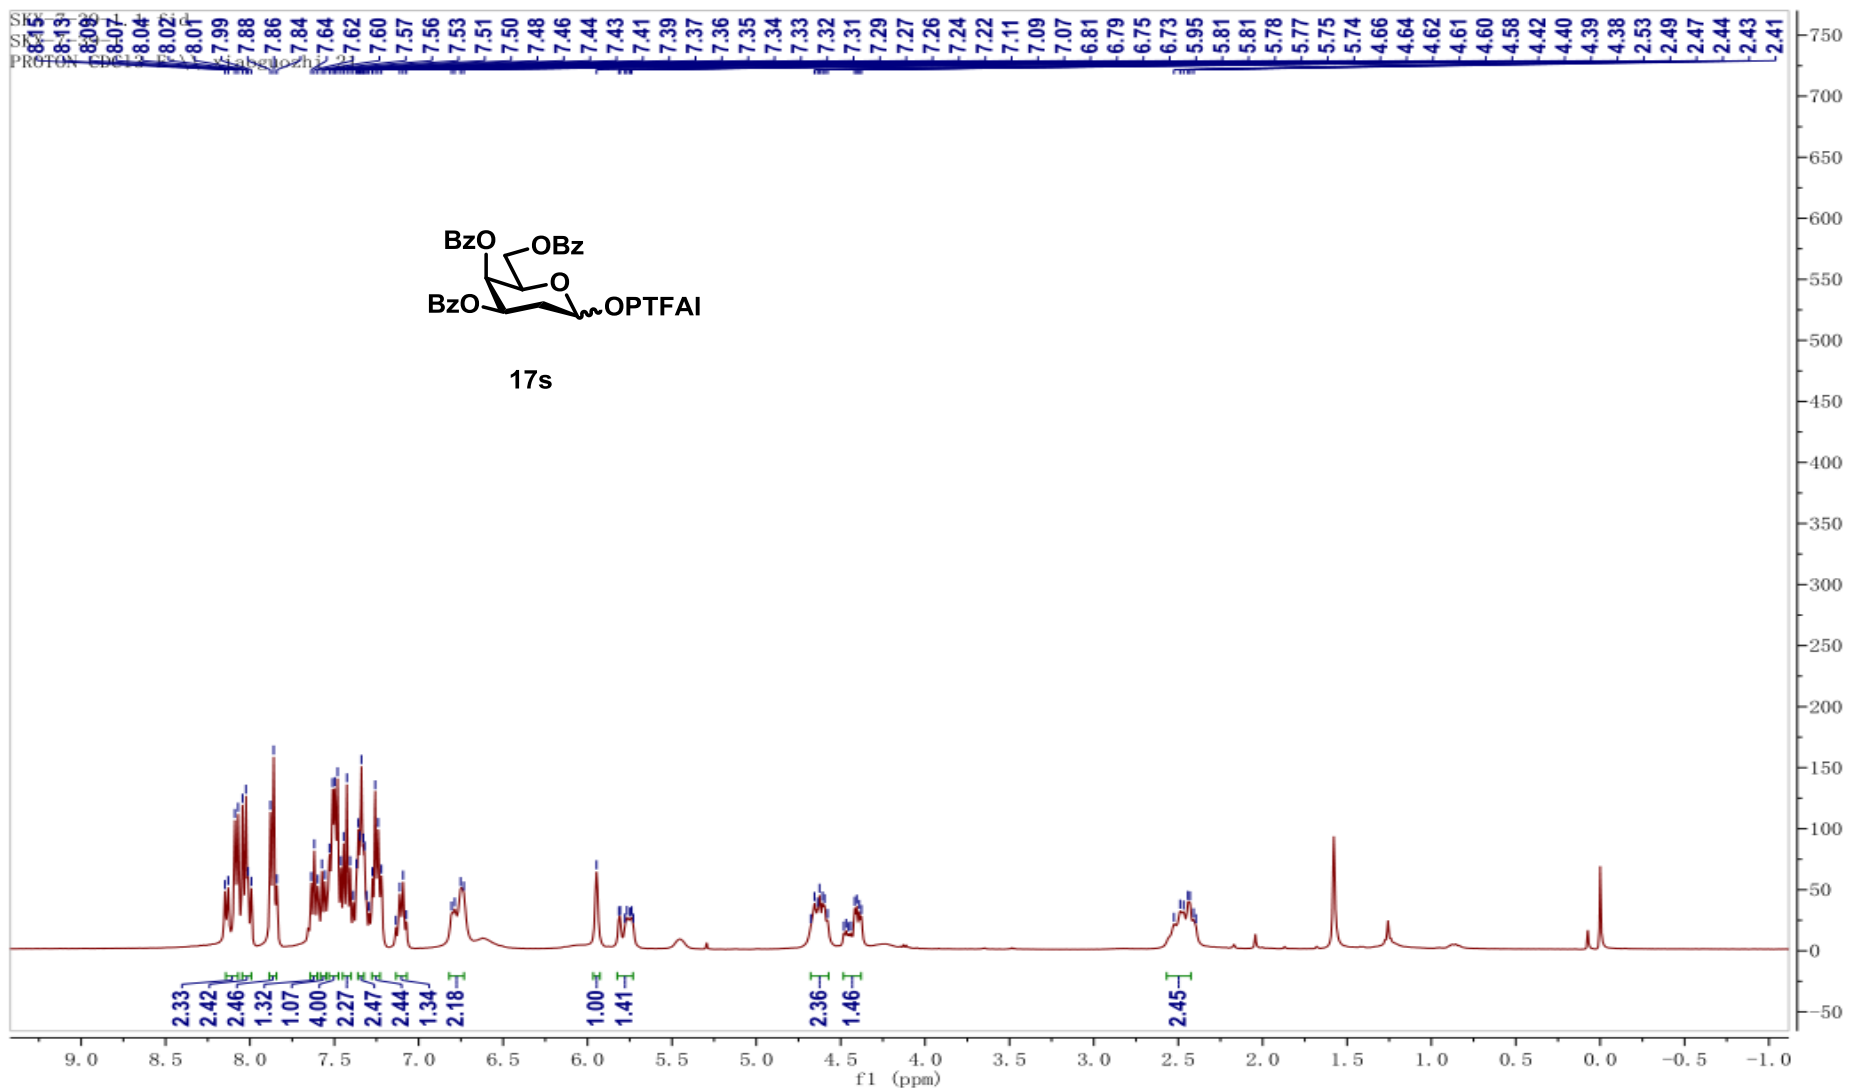

SKX-7-39-3. 1. fid  
SKX-7-39-3  
c13 CDC13 E:\\ xiaoguozi 11

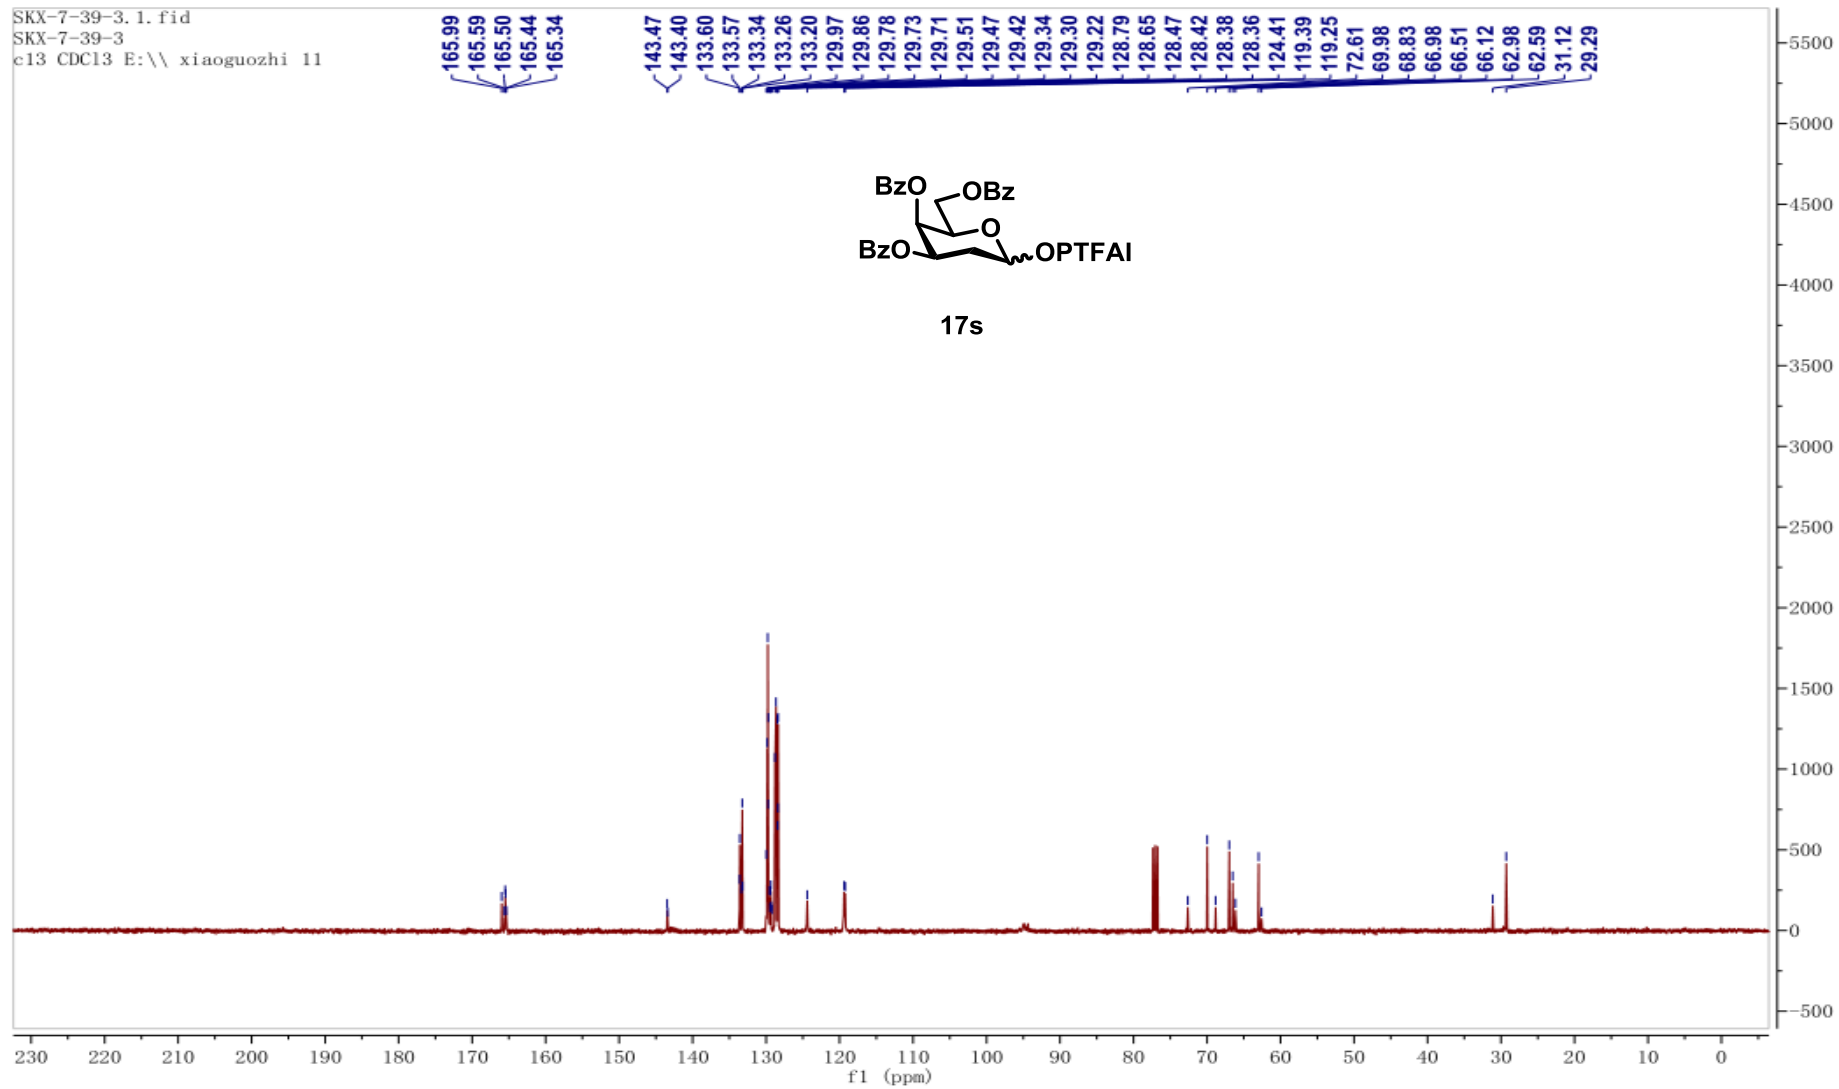

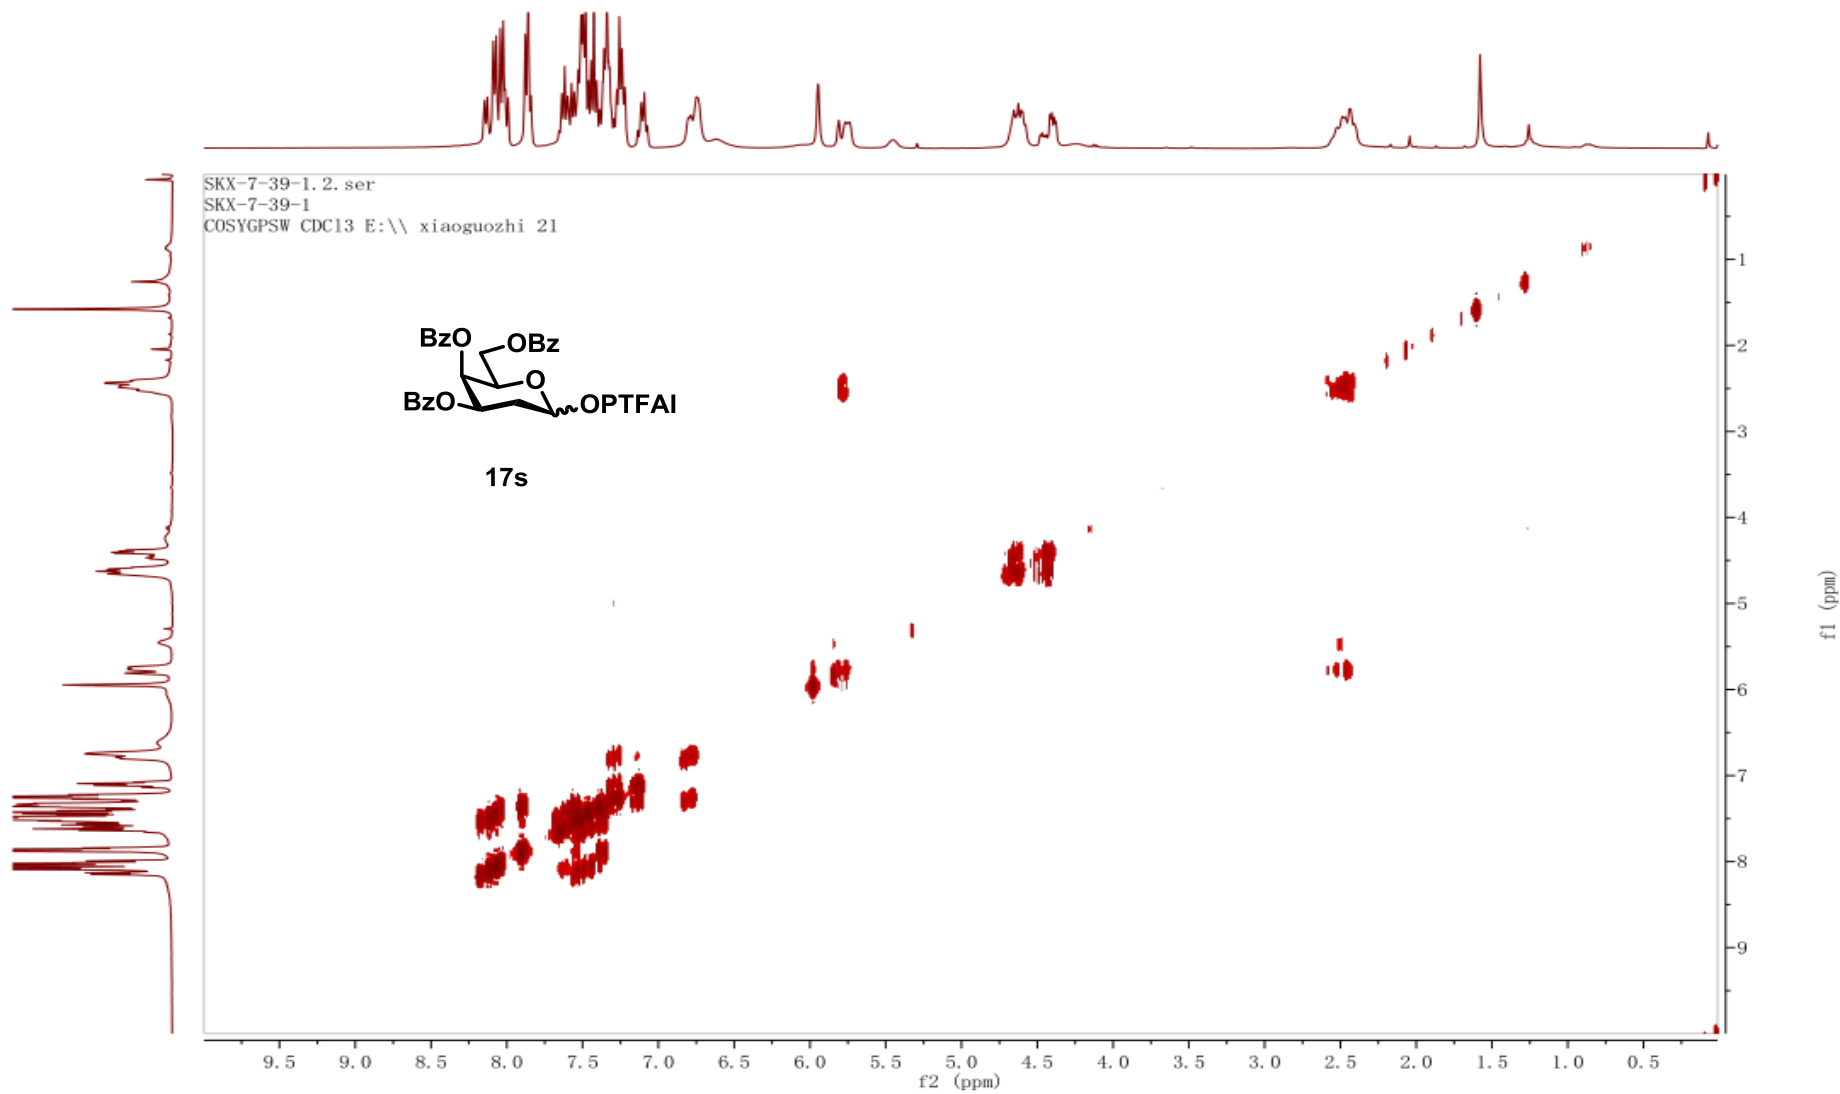

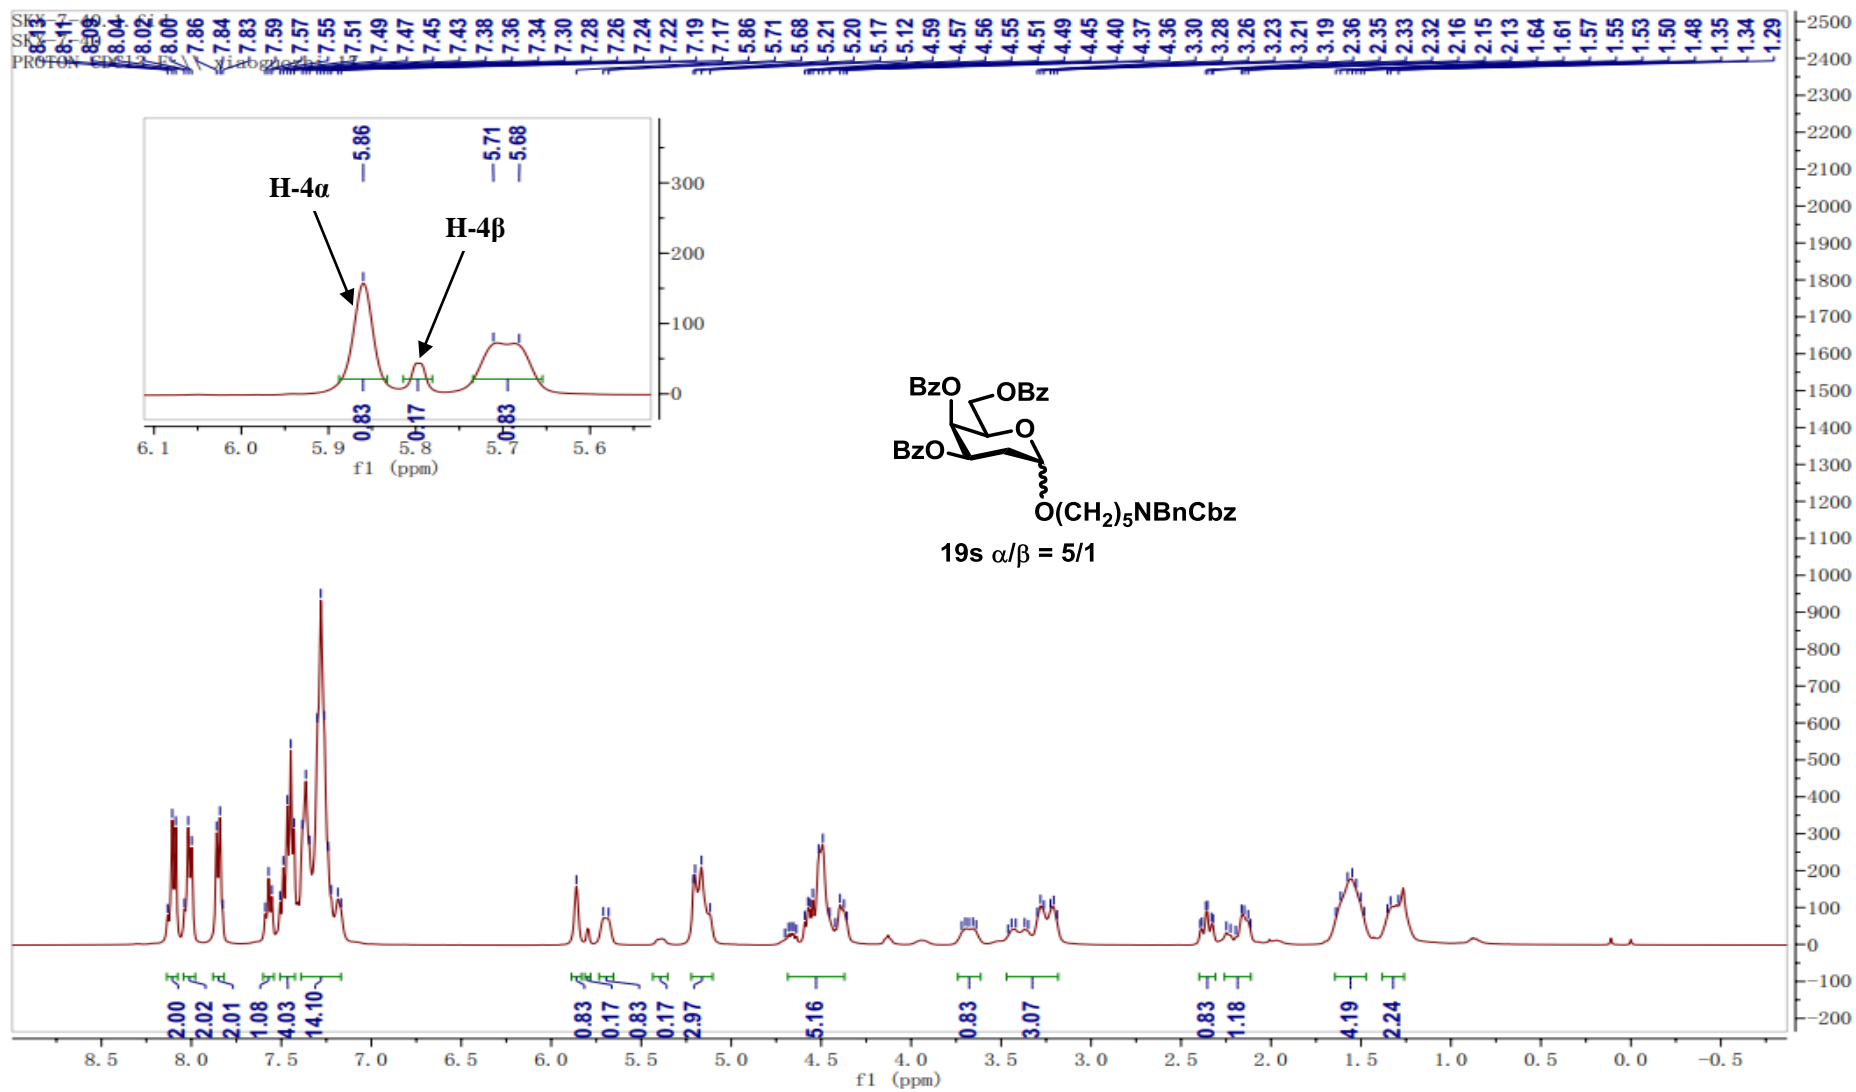

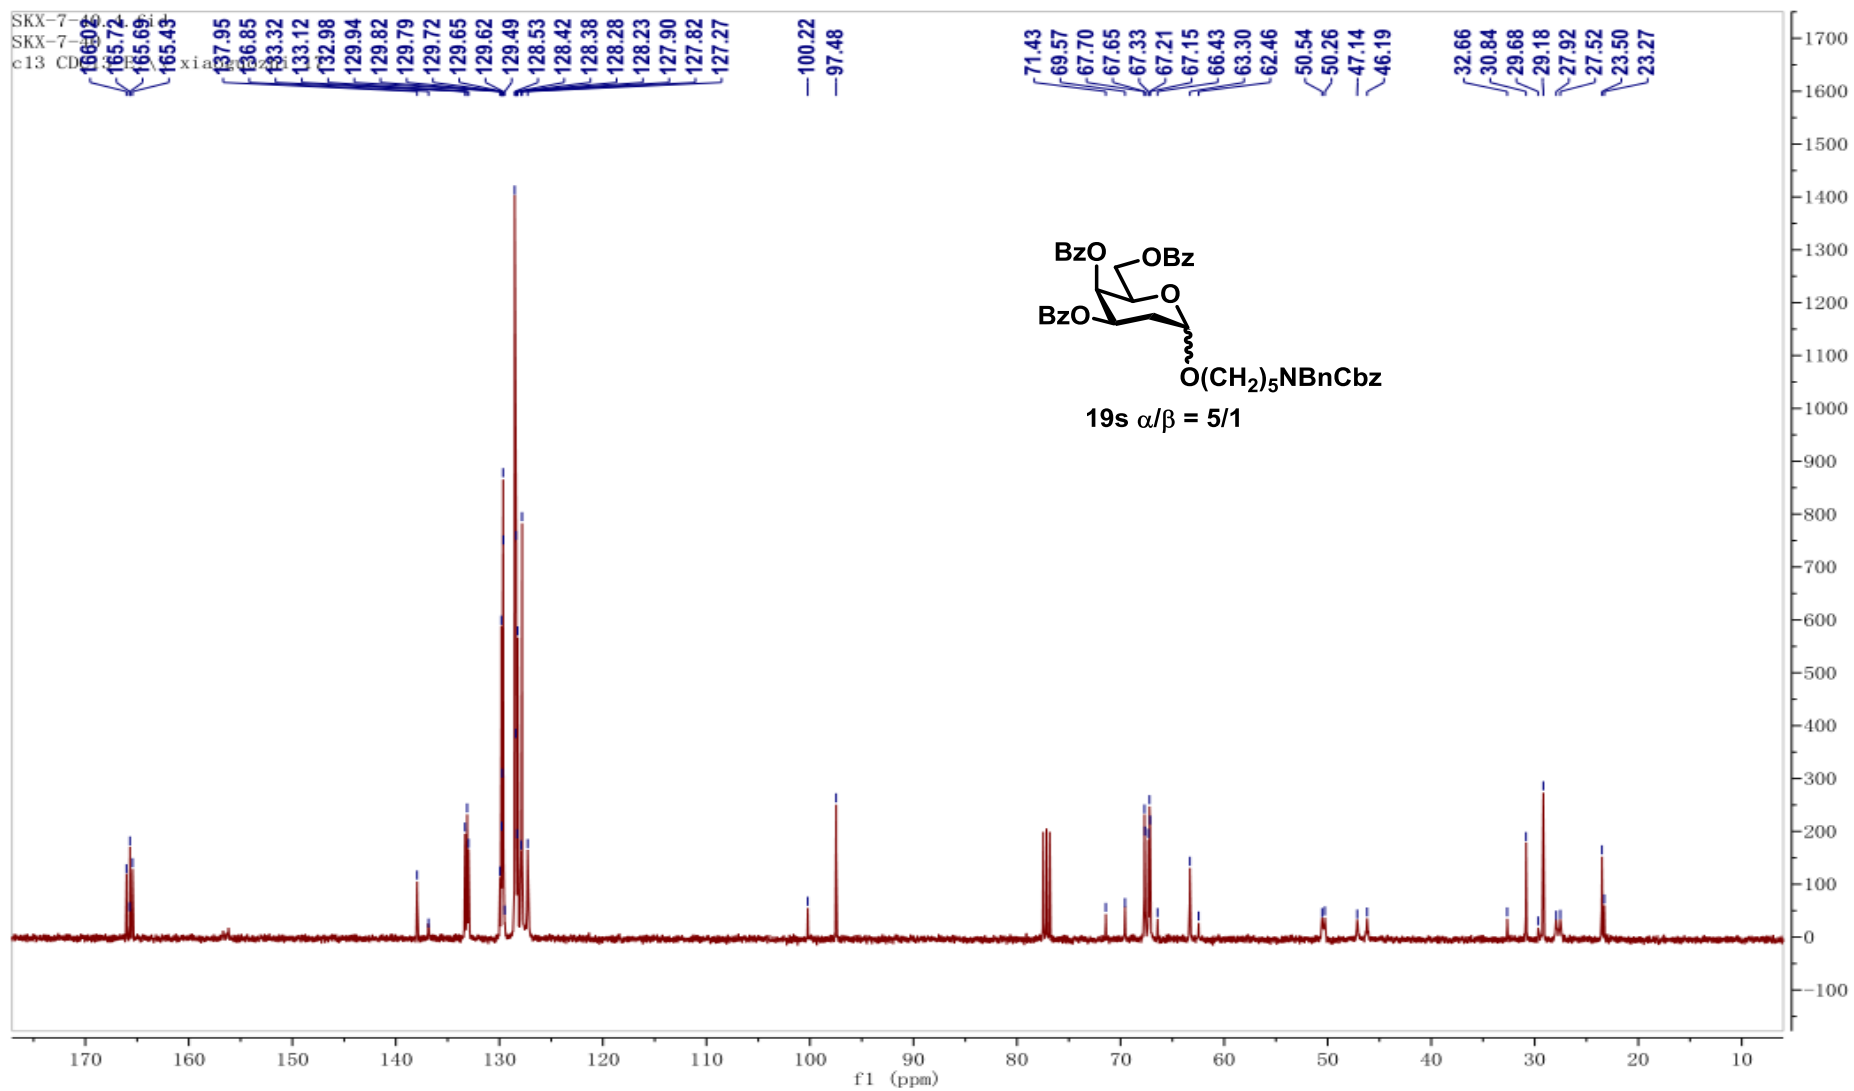

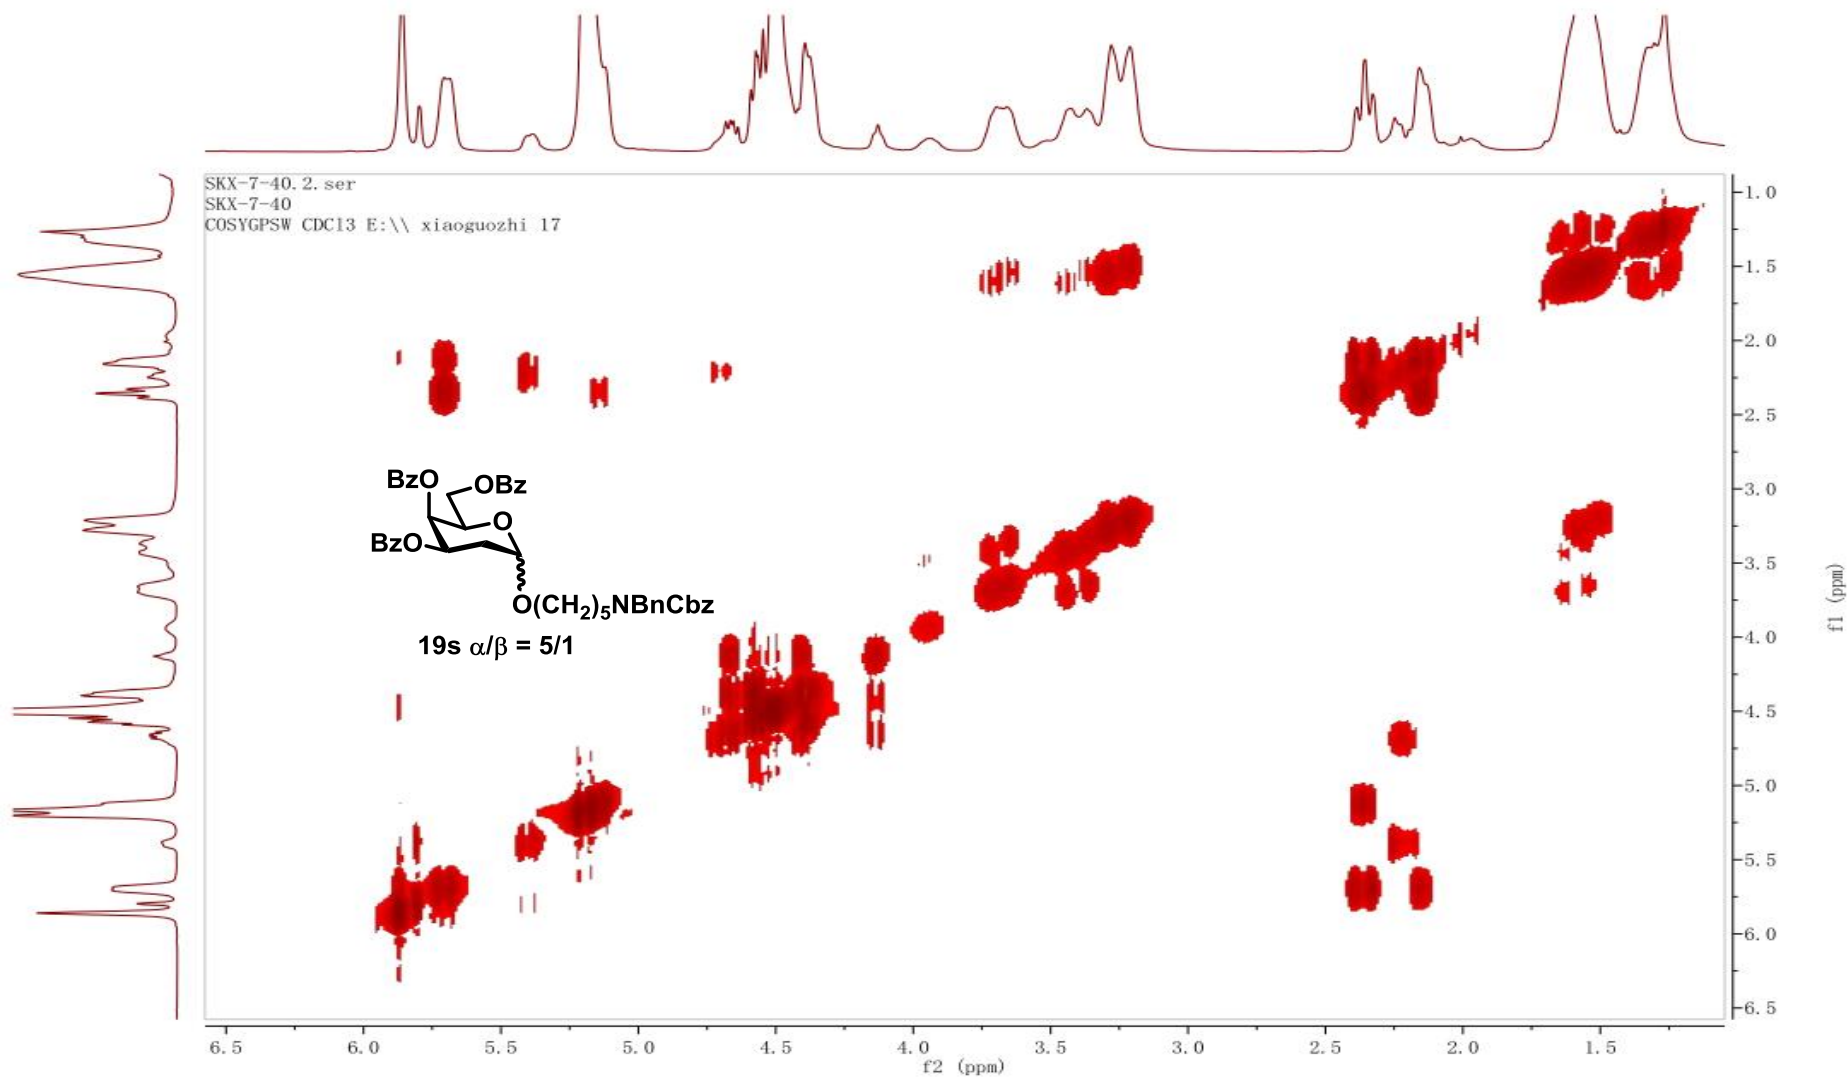



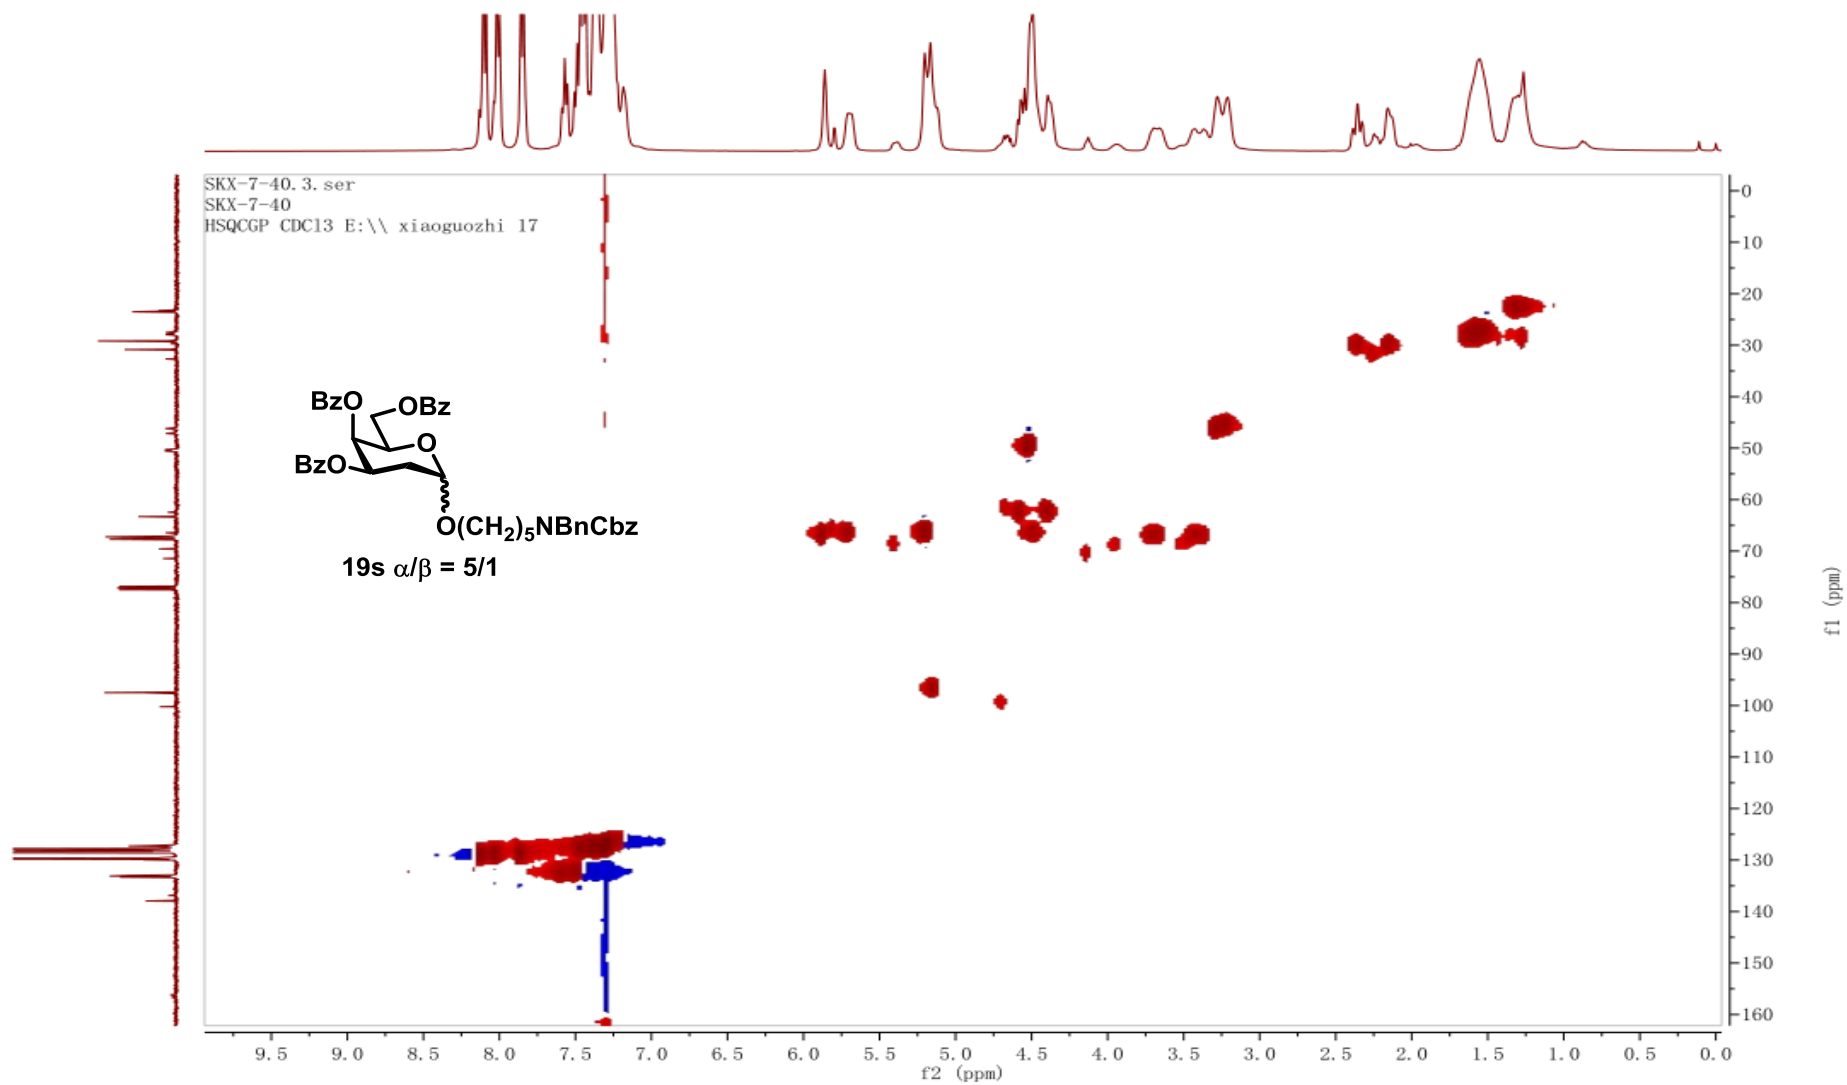

Supplement: d4sc01348d1.pdf [file d4sc01348d1.pdf]
